# Supplementary material
Source: Preprints.org preprint supplement (doi:10.20944/preprints202108.0038.v1)
Supplement: Supplementary file 1 [file supplementary]

## Sheet: Dataset(LysateBanLecp005)
Name of dataset: LysateBanLecp005
No. of identified items: 444 of 453
No. of unidentified items: 9
ID type: GeneSymbol
Number of mapped gene: 444
Is dataset quantitative :NO
Mapped items:
Dataset item (Gene symbol )		Entrez ID	Gene symbol	Description	Alternate names	Chromosome	Map location
ABCB8		11194	ABCB8	ATP-binding cassette, sub-family B (MDR/TAP), member 8	EST328128|M-ABC1|MABC1	7	7q36
ABCC1		4363	ABCC1	ATP-binding cassette, sub-family C (CFTR/MRP), member 1	ABC29|ABCC|GS-X|MRP|MRP1	16	16p13.1
ABCD3		5825	ABCD3	ATP-binding cassette, sub-family D (ALD), member 3	ABC43|CBAS5|PMP70|PXMP1|ZWS2	1	1p21.3
ANAPC4		29945	ANAPC4	anaphase promoting complex subunit 4	APC4	4	4p15.2
ANKHD1		54882	ANKHD1	ankyrin repeat and KH domain containing 1	MASK|MASK1|PP2500|VBARP	5	5q31.3
ARID2		196528	ARID2	AT rich interactive domain 2 (ARID, RFX-like)	BAF200|p200	12	12q12
ARPP19		10776	ARPP19	cAMP-regulated phosphoprotein, 19kDa	ARPP-16|ARPP-19|ARPP16|ENSAL	15	15q21.2
ASAP2		8853	ASAP2	ArfGAP with SH3 domain, ankyrin repeat and PH domain 2	AMAP2|CENTB3|DDEF2|PAG3|PAP|Pap-alpha|SHAG1	2	2p25|2p24
ATM		472	ATM	ATM serine/threonine kinase	AT1|ATA|ATC|ATD|ATDC|ATE|TEL1|TELO1	11	11q22-q23
AUP1		550	AUP1	ancient ubiquitous protein 1	-	2	2p13
AURKB		9212	AURKB	aurora kinase B	AIK2|AIM-1|AIM1|ARK2|AurB|IPL1|PPP1R48|STK12|STK5|aurkb-sv1|aurkb-sv2	17	17p13.1
BCKDHB		594	BCKDHB	branched chain keto acid dehydrogenase E1, beta polypeptide	E1B|dJ279A18.1	6	6q14.1
BCL2		596	BCL2	B-cell CLL/lymphoma 2	Bcl-2|PPP1R50	18	18q21.3
BCL2L1		598	BCL2L1	BCL2-like 1	BCL-XL/S|BCL2L|BCLX|BCLXL|BCLXS|Bcl-X|PPP1R52|bcl-xL|bcl-xS	20	20q11.21
BORA		79866	BORA	bora, aurora kinase A activator	C13orf34	13	13q22.1
BRI3BP		140707	BRI3BP	BRI3 binding protein	BNAS1|HCCR-1|HCCR-2|HCCRBP-1|KG19	12	12q24.31
C1orf112		55732	C1orf112	chromosome 1 open reading frame 112	-	1	1q24.2
C21orf59		56683	C21orf59	chromosome 21 open reading frame 59	C21orf48|CILD26|FBB18	21	21q22.1
C9orf78		51759	C9orf78	chromosome 9 open reading frame 78	HCA59|HSPC220|bA409K20.3	9	9q34.11
CAAP1		79886	CAAP1	caspase activity and apoptosis inhibitor 1	C9orf82|CAAP	9	9p21.2
CASP2		835	CASP2	caspase 2, apoptosis-related cysteine peptidase	CASP-2|ICH1|NEDD-2|NEDD2|PPP1R57	7	7q34-q35
CBLL1		79872	CBLL1	Cbl proto-oncogene-like 1, E3 ubiquitin protein ligase	HAKAI|RNF188	7	7q22.3
CCNK		8812	CCNK	cyclin K	CPR4	14	14q32
CCR4		1233	CCR4	chemokine (C-C motif) receptor 4	CC-CKR-4|CD194|CKR4|CMKBR4|ChemR13|HGCN:14099|K5-5	3	3p24
CD69		969	CD69	CD69 molecule	AIM|BL-AC/P26|CLEC2C|EA1|GP32/28|MLR-3	12	12p13
CD82		3732	CD82	CD82 molecule	4F9|C33|GR15|IA4|KAI1|R2|SAR2|ST6|TSPAN27	11	11p11.2
CDC42SE2		56990	CDC42SE2	CDC42 small effector 2	SPEC2	5	5q31.1
CDK1		983	CDK1	cyclin-dependent kinase 1	CDC2|CDC28A|P34CDC2	10	10q21.1
CDK12		51755	CDK12	cyclin-dependent kinase 12	CRK7|CRKR|CRKRS	17	17q12
CDK13		8621	CDK13	cyclin-dependent kinase 13	CDC2L|CDC2L5|CHED|hCDK13	7	7p13
CDK2AP1		8099	CDK2AP1	cyclin-dependent kinase 2 associated protein 1	DOC1|DORC1|ST19|doc-1|p12DOC-1	12	12q24.31
CDK6		1021	CDK6	cyclin-dependent kinase 6	MCPH12|PLSTIRE	7	7q21-q22
CDV3		55573	CDV3	CDV3 homolog (mouse)	H41	3	3q22.1
CEBPB		1051	CEBPB	CCAAT/enhancer binding protein (C/EBP), beta	C/EBP-beta|IL6DBP|NF-IL6|TCF5	20	20q13.1
CELF1		10658	CELF1	CUGBP, Elav-like family member 1	BRUNOL2|CUG-BP|CUGBP|CUGBP1|EDEN-BP|NAB50|NAPOR|hNab50	11	11p11
CEND1		51286	CEND1	cell cycle exit and neuronal differentiation 1	BM88	11	11p15.5
CENPH		64946	CENPH	centromere protein H	-	5	5p15.2
CENPK		64105	CENPK	centromere protein K	AF5alpha|CENP-K|FKSG14|P33|Solt	5	5q12.3
CHAF1B		8208	CHAF1B	chromatin assembly factor 1, subunit B (p60)	CAF-1|CAF-IP60|CAF1|CAF1A|CAF1P60|MPHOSPH7|MPP7	21	21q22.13
CHEK1		1111	CHEK1	checkpoint kinase 1	CHK1	11	11q24.2
CHTF18		63922	CHTF18	chromosome transmission fidelity factor 18	C16orf41|C321D2.2|C321D2.3|C321D2.4|CHL12|Ctf18|RUVBL	16	16p13.3
CKAP2		26586	CKAP2	cytoskeleton associated protein 2	LB1|TMAP|se20-10	13	13q14
CLK3		1198	CLK3	CDC-like kinase 3	PHCLK3|PHCLK3/152	15	15q24
CLUH		23277	CLUH	clustered mitochondria (cluA/CLU1) homolog	CLU1|KIAA0664	17	17p13.3
COG4		25839	COG4	component of oligomeric golgi complex 4	CDG2J|COD1	16	16q22.1
COX6A1		1337	COX6A1	cytochrome c oxidase subunit VIa polypeptide 1	CMTRID|COX6A|COX6AL	12	12q24.2|12q24.2
CRTC2		200186	CRTC2	CREB regulated transcription coactivator 2	TORC-2|TORC2	1	1q21.3
CYP51A1		1595	CYP51A1	cytochrome P450, family 51, subfamily A, polypeptide 1	CP51|CYP51|CYPL1|LDM|P450-14DM|P450L1	7	7q21.2
DAPL1		92196	DAPL1	death associated protein-like 1	-	2	2q24.1
DCAF13		25879	DCAF13	DDB1 and CUL4 associated factor 13	GM83|HSPC064|WDSOF1	8	8q22.3
DCUN1D5		84259	DCUN1D5	DCN1, defective in cullin neddylation 1, domain containing 5	SCCRO5	11	11q22.3
DDX10		1662	DDX10	DEAD (Asp-Glu-Ala-Asp) box polypeptide 10	HRH-J8	11	11q22-q23
DDX18		8886	DDX18	DEAD (Asp-Glu-Ala-Asp) box polypeptide 18	MrDb	2	2q14.1
DDX19B		11269	DDX19B	DEAD (Asp-Glu-Ala-Asp) box polypeptide 19B	DBP5|DDX19|RNAh	16	16q22.1
DDX31		64794	DDX31	DEAD (Asp-Glu-Ala-Asp) box polypeptide 31	PPP1R25	9	9q34.13
DES		1674	DES	desmin	CSM1|CSM2|LGMD2R	2	2q35
DHCR24		1718	DHCR24	24-dehydrocholesterol reductase	DCE|Nbla03646|SELADIN1|seladin-1	1	1p32.3
DHX29		54505	DHX29	DEAH (Asp-Glu-Ala-His) box polypeptide 29	DDX29	5	5q11.2
DHX36		170506	DHX36	DEAH (Asp-Glu-Ala-His) box polypeptide 36	DDX36|G4R1|MLEL1|RHAU	3	3q25.2
DLG1		1739	DLG1	discs, large homolog 1 (Drosophila)	DLGH1|SAP-97|SAP97|dJ1061C18.1.1|hdlg	3	3q29
DLGAP4		22839	DLGAP4	discs, large (Drosophila) homolog-associated protein 4	DAP-4|DAP4|DLP4|SAPAP-4|SAPAP4	20	20q11.23
DPCD		25911	DPCD	deleted in primary ciliary dyskinesia homolog (mouse)	-	10	10q24.32
DPH5		51611	DPH5	diphthamide biosynthesis 5	AD-018|CGI-30|HSPC143|NPD015	1	1p21.2
DSCC1		79075	DSCC1	DNA replication and sister chromatid cohesion 1	DCC1	8	8q24.12
DUS3L		56931	DUS3L	dihydrouridine synthase 3-like	DUS3	19	19p13.3
DUSP12		11266	DUSP12	dual specificity phosphatase 12	DUSP1|YVH1	1	1q21-q22
EBP		10682	EBP	emopamil binding protein (sterol isomerase)	CDPX2|CHO2|CPX|CPXD	X	Xp11.23-p11.22
EHMT2		10919	EHMT2	euchromatic histone-lysine N-methyltransferase 2	BAT8|C6orf30|G9A|GAT8|KMT1C|NG36	6	6p21.31
EIF4EBP1		1978	EIF4EBP1	eukaryotic translation initiation factor 4E binding protein 1	4E-BP1|4EBP1|BP-1|PHAS-I	8	8p12
EIF4ENIF1		56478	EIF4ENIF1	eukaryotic translation initiation factor 4E nuclear import factor 1	4E-T|Clast4	22	22q11.2
ELP5		23587	ELP5	elongator acetyltransferase complex subunit 5	C17orf81|DERP6|HSPC002|MST071|MSTP071	17	17p13.1
ETV6		2120	ETV6	ets variant 6	TEL|TEL/ABL|THC5	12	12p13
F8A1		8263	F8A1	coagulation factor VIII-associated 1	DXS522E|F8A|HAP40	X	Xq28
FAM162A		26355	FAM162A	family with sequence similarity 162, member A	C3orf28|E2IG5|HGTD-P	3	3q21.1
FAM98A		25940	FAM98A	family with sequence similarity 98, member A	-	2	2p22.3
FANCD2		2177	FANCD2	Fanconi anemia, complementation group D2	FA-D2|FA4|FACD|FAD|FAD2|FANCD	3	3p26
FANCI		55215	FANCI	Fanconi anemia, complementation group I	KIAA1794	15	15q26.1
FAR1		84188	FAR1	fatty acyl CoA reductase 1	MLSTD2|PFCRD|SDR10E1	11	11p15.2
FBXO7		25793	FBXO7	F-box protein 7	FBX|FBX07|FBX7|PARK15|PKPS	22	22q12.3
FBXW11		23291	FBXW11	F-box and WD repeat domain containing 11	BTRC2|BTRCP2|FBW1B|FBXW1B|Fbw11|Hos	5	5q35.1
FCF1		51077	FCF1	FCF1 rRNA-processing protein	Bka|C14orf111|CGI-35|UTP24	14	14q24.3
FTSJ3		117246	FTSJ3	FtsJ homolog 3 (E. coli)	EPCS3|SPB1	17	17q23.3
FUBP1		8880	FUBP1	far upstream element (FUSE) binding protein 1	FBP|FUBP|hDH V	1	1p31.1
GALT		2592	GALT	galactose-1-phosphate uridylyltransferase	-	9	9p13
GBP6		163351	GBP6	guanylate binding protein family, member 6	-	1	1p22.2
GRIPAP1		56850	GRIPAP1	GRIP1 associated protein 1	GRASP-1	X	Xp11.23
GRSF1		2926	GRSF1	G-rich RNA sequence binding factor 1	-	4	4q13
GTF2H4		2968	GTF2H4	general transcription factor IIH, polypeptide 4, 52kDa	P52|TFB2|TFIIH	6	6p21.3
HCCS		3052	HCCS	holocytochrome c synthase	CCHL|LSDMCA1|MCOPS7|MLS	X	Xp22.3
HDAC3		8841	HDAC3	histone deacetylase 3	HD3|RPD3|RPD3-2	5	5q31
HIGD1A		25994	HIGD1A	HIG1 hypoxia inducible domain family, member 1A	HIG1|RCF1a	3	3p22.1
HLA-DRB1		3123	HLA-DRB1	major histocompatibility complex, class II, DR beta 1	DRB1|DRw10|HLA-DR1B|HLA-DRB|SS1	6	6p21.3
HN1		51155	HN1	hematological and neurological expressed 1	ARM2|HN1A	17	17q25.1
HPDL		84842	HPDL	4-hydroxyphenylpyruvate dioxygenase-like	4-HPPD-L|GLOXD1	1	1p34.1
IMP3		55272	IMP3	IMP3, U3 small nucleolar ribonucleoprotein	BRMS2|C15orf12|MRPS4	15	15q24
INTS2		57508	INTS2	integrator complex subunit 2	INT2|KIAA1287	17	17q23.2
IPO11		51194	IPO11	importin 11	RanBP11	5	5q12.1
ISY1		57461	ISY1	ISY1 splicing factor homolog	FSAP33	3	3q21.3
KAT7		11143	KAT7	K(lysine) acetyltransferase 7	HBO1|HBOA|MYST2|ZC2HC7	17	17q21.32
KDM3B		51780	KDM3B	lysine (K)-specific demethylase 3B	5qNCA|C5orf7|JMJD1B|NET22	5	5q31
KIAA0101		9768	KIAA0101	KIAA0101	L5|NS5ATP9|OEATC|OEATC-1|OEATC1|PAF|PAF15|p15(PAF)|p15/PAF|p15PAF	15	15q22.31
KIF1BP		26128	KIF1BP	KIF1 binding protein	KBP|KIAA1279|TTC20	10	10q22.1
KIF23		9493	KIF23	kinesin family member 23	CHO1|KNSL5|MKLP-1|MKLP1	15	15q23
KIF4A		24137	KIF4A	kinesin family member 4A	KIF4|KIF4G1|MRX100	X	Xq13.1
KIFC1		3833	KIFC1	kinesin family member C1	HSET|KNSL2	6	6p21.3
KLF13		51621	KLF13	Kruppel-like factor 13	BTEB3|FKLF2|NSLP1|RFLAT-1|RFLAT1	15	15q12
LAG3		3902	LAG3	lymphocyte-activation gene 3	CD223	12	12p13.32
LARP4B		23185	LARP4B	La ribonucleoprotein domain family, member 4B	KIAA0217|LARP5	10	10p15.3
LEMD2		221496	LEMD2	LEM domain containing 2	NET25|dJ482C21.1	6	6p21.31
LIMS1		3987	LIMS1	LIM and senescent cell antigen-like domains 1	PINCH|PINCH-1|PINCH1	2	2q12.3
LIN7C		55327	LIN7C	lin-7 homolog C (C. elegans)	LIN-7-C|LIN-7C|MALS-3|MALS3|VELI3	11	11p14
LPGAT1		9926	LPGAT1	lysophosphatidylglycerol acyltransferase 1	FAM34A|FAM34A1|NET8	1	1q32
MAN1A1		4121	MAN1A1	mannosidase, alpha, class 1A, member 1	HUMM3|HUMM9|MAN9	6	6q22
MAN2A1		4124	MAN2A1	mannosidase, alpha, class 2A, member 1	AMan II|GOLIM7|MANA2|MANII	5	5q21.3
MED14		9282	MED14	mediator complex subunit 14	CRSP150|CRSP2|CSRP|CXorf4|DRIP150|EXLM1|RGR1|TRAP170	X	Xp11.4
MIER1		57708	MIER1	mesoderm induction early response 1, transcriptional regulator	ER1|MI-ER1	1	1p31.3
MMAB		326625	MMAB	methylmalonic aciduria (cobalamin deficiency) cblB type	ATR|CFAP23|cblB|cob	12	12q24
MMP14		4323	MMP14	matrix metallopeptidase 14 (membrane-inserted)	MMP-14|MMP-X1|MT-MMP|MT-MMP 1|MT1-MMP|MT1MMP|MTMMP1|WNCHRS	14	14q11.2
MORF4L1		10933	MORF4L1	mortality factor 4 like 1	Eaf3|FWP006|HsT17725|MEAF3|MORFRG15|MRG15|S863-6	15	15q24
MRPL2		51069	MRPL2	mitochondrial ribosomal protein L2	CGI-22|MRP-L14|RPML14	6	6p21.3
MRPL24		79590	MRPL24	mitochondrial ribosomal protein L24	L24mt|MRP-L18|MRP-L24	1	1q23.1
MRPL47		57129	MRPL47	mitochondrial ribosomal protein L47	CGI-204|L47mt|MRP-L47|NCM1	3	3q26.33
MRPL54		116541	MRPL54	mitochondrial ribosomal protein L54	L54mt|MRP-L54	19	19p13.3
MRPS18B		28973	MRPS18B	mitochondrial ribosomal protein S18B	C6orf14|HSPC183|HumanS18a|MRP-S18-2|MRPS18-2|PTD017|S18amt	6	6p21.3
MRPS21		54460	MRPS21	mitochondrial ribosomal protein S21	MDS016|MRP-S21|RPMS21	1	1q21
MRPS26		64949	MRPS26	mitochondrial ribosomal protein S26	C20orf193|GI008|MRP-S13|MRP-S26|MRPS13|NY-BR-87|RPMS13|dJ534B8.3	20	20p13
MYL12B		103910	MYL12B	myosin, light chain 12B, regulatory	MLC-B|MRLC2	18	18p11.31
MYO9B		4650	MYO9B	myosin IXB	CELIAC4|MYR5	19	19p13.1
NAA40		79829	NAA40	N(alpha)-acetyltransferase 40, NatD catalytic subunit	NAT11|PATT1	11	11q13.1
NCAPD3		23310	NCAPD3	non-SMC condensin II complex, subunit D3	CAP-D3|CAPD3|hCAP-D3|hHCP-6|hcp-6	11	11q25
NDC1		55706	NDC1	NDC1 transmembrane nucleoporin	NET3|TMEM48	1	1p32.3
NDEL1		81565	NDEL1	nudE neurodevelopment protein 1-like 1	EOPA|MITAP1|NDE1L1|NDE2|NUDEL	17	17p13.1
NDUFAF3		25915	NDUFAF3	NADH dehydrogenase (ubiquinone) complex I, assembly factor 3	2P1|C3orf60|E3-3	3	3p21.31
NMD3		51068	NMD3	NMD3 ribosome export adaptor	CGI-07	3	3q26.1
NOB1		28987	NOB1	NIN1/RPN12 binding protein 1 homolog	ART-4|MST158|MSTP158|NOB1P|PSMD8BP1	16	16q22.3
NOC2L		26155	NOC2L	NOC2-like nucleolar associated transcriptional repressor	NET15|NET7|NIR|PPP1R112	1	1p36.33
NOP14		8602	NOP14	NOP14 nucleolar protein	C4orf9|NOL14|RES4-25|RES425|UTP2	4	4p16.3
NSA2		10412	NSA2	NSA2 ribosome biogenesis homolog	CDK105|HCL-G1|HCLG1|HUSSY-29|HUSSY29|TINP1	5	5q13.3
NTMT1		28989	NTMT1	N-terminal Xaa-Pro-Lys N-methyltransferase 1	AD-003|C9orf32|HOMT1A|METTL11A|NRMT|NTM1A	9	9q34.11
NUDT15		55270	NUDT15	nudix (nucleoside diphosphate linked moiety X)-type motif 15	MTH2	13	13q14.2
NUFIP2		57532	NUFIP2	nuclear fragile X mental retardation protein interacting protein 2	182-FIP|82-FIP|FIP-82|PIG1	17	17q11.2
ORC4		5000	ORC4	origin recognition complex, subunit 4	ORC4L|ORC4P	2	2q22-q23
OXA1L		5018	OXA1L	oxidase (cytochrome c) assembly 1-like	OXA1	14	14q11.2
PAIP2		51247	PAIP2	poly(A) binding protein interacting protein 2	PAIP-2|PAIP2A	5	5q31.2
PDK3		5165	PDK3	pyruvate dehydrogenase kinase, isozyme 3	CMTX6|GS1-358P8.4	X	Xp22.11
PEX14		5195	PEX14	peroxisomal biogenesis factor 14	NAPP2|PBD13A|Pex14p|dJ734G22.2	1	1p36.22
PFN2		5217	PFN2	profilin 2	D3S1319E|PFL	3	3q25.1
PHAX		51808	PHAX	phosphorylated adaptor for RNA export	RNUXA	5	5q23.2
PHF14		9678	PHF14	PHD finger protein 14	-	7	7p21.3
PLCB3		5331	PLCB3	phospholipase C, beta 3 (phosphatidylinositol-specific)	-	11	11q13
POLA1		5422	POLA1	polymerase (DNA directed), alpha 1, catalytic subunit	NSX|POLA|p180	X	Xp22.1-p21.3
PRCC		5546	PRCC	papillary renal cell carcinoma (translocation-associated)	RCCP1|TPRC	1	1q21.1
PRKCA		5578	PRKCA	protein kinase C, alpha	AAG6|PKC-alpha|PKCA|PRKACA	17	17q22-q23.2
PRMT3		10196	PRMT3	protein arginine methyltransferase 3	HRMT1L3	11	11p15.1
PSAT1		29968	PSAT1	phosphoserine aminotransferase 1	EPIP|NLS2|PSA|PSAT|PSATD	9	9q21.2
PSMD5		5711	PSMD5	proteasome (prosome, macropain) 26S subunit, non-ATPase, 5	S5B	9	9q33.2
PSMG3		84262	PSMG3	proteasome (prosome, macropain) assembly chaperone 3	C7orf48|PAC3	7	7p22.3
PUM1		9698	PUM1	pumilio RNA-binding family member 1	HSPUM|PUMH|PUMH1|PUML1	1	1p35.2
PYCR1		5831	PYCR1	pyrroline-5-carboxylate reductase 1	ARCL2B|ARCL3B|P5C|P5CR|PIG45|PP222|PRO3|PYCR	17	17q25.3
QTRT1		81890	QTRT1	queuine tRNA-ribosyltransferase 1	FP3235|TGT|TGUT	19	19p13.3
RAC1		5879	RAC1	ras-related C3 botulinum toxin substrate 1 (rho family, small GTP binding protein Rac1)	MIG5|Rac-1|TC-25|p21-Rac1	7	7p22
RAD9A		5883	RAD9A	RAD9 checkpoint clamp component A	RAD9	11	11q13.1-q13.2
RANBP6		26953	RANBP6	RAN binding protein 6	-	9	9p24.1
RB1		5925	RB1	retinoblastoma 1	OSRC|PPP1R130|RB|p105-Rb|pRb|pp110	13	13q14.2
RBM20		282996	RBM20	RNA binding motif protein 20	-	10	10q25.2
REXO4		57109	REXO4	REX4 homolog, 3'-5' exonuclease	REX4|XPMC2|XPMC2H	9	9q34.2
RFK		55312	RFK	riboflavin kinase	RIFK	9	9q21.13
RGS3		5998	RGS3	regulator of G-protein signaling 3	C2PA|RGP3	9	9q32
RIF1		55183	RIF1	replication timing regulatory factor 1	-	2	2q23.3
RMI2		116028	RMI2	RecQ mediated genome instability 2	BLAP18|C16orf75	16	16p13.13
RNASEH2B		79621	RNASEH2B	ribonuclease H2, subunit B	AGS2|DLEU8	13	13q14.3
RPRD2		23248	RPRD2	regulation of nuclear pre-mRNA domain containing 2	HSPC099|KIAA0460	1	1q21.3
RRM2		6241	RRM2	ribonucleotide reductase M2	R2|RR2|RR2M	2	2p25-p24
RSRC2		65117	RSRC2	arginine/serine-rich coiled-coil 2	-	12	12q24.31
SDAD1		55153	SDAD1	SDA1 domain containing 1	-	4	4q21.1
SEC24B		10427	SEC24B	SEC24 family member B	SEC24	4	4q25
SHOC2		8036	SHOC2	SHOC2 leucine-rich repeat scaffold protein	SIAA0862|SOC2|SUR8	10	10q25
SLC35E1		79939	SLC35E1	solute carrier family 35, member E1	-	19	19p13.11
SMC2		10592	SMC2	structural maintenance of chromosomes 2	CAP-E|CAPE|SMC-2|SMC2L1	9	9q31.1
SMN1		6606	SMN1	survival of motor neuron 1, telomeric	BCD541|GEMIN1|SMA|SMA1|SMA2|SMA3|SMA4|SMA@|SMN|SMNT|T-BCD541|TDRD16A	5	5q13.2
SOAT1		6646	SOAT1	sterol O-acyltransferase 1	ACACT|ACAT|ACAT-1|ACAT1|SOAT|STAT	1	1q25
SPATA5L1		79029	SPATA5L1	spermatogenesis associated 5-like 1	-	15	15q21.1
SPC25		57405	SPC25	SPC25, NDC80 kinetochore complex component	AD024|SPBC25|hSpc25	2	2q31.1
SPIN3		169981	SPIN3	spindlin family, member 3	SPIN-3|bA445O16.1	X	Xp11.21
SRBD1		55133	SRBD1	S1 RNA binding domain 1	-	2	2p21
SRSF12		135295	SRSF12	serine/arginine-rich splicing factor 12	SFRS13B|SFRS19|SRrp35	6	6q15
STK17A		9263	STK17A	serine/threonine kinase 17a	DRAK1	7	7p13
STX5		6811	STX5	syntaxin 5	SED5|STX5A	11	11q12.3
SYNJ2BP		55333	SYNJ2BP	synaptojanin 2 binding protein	ARIP2|OMP25	14	14q24.2
SZRD1		26099	SZRD1	SUZ RNA binding domain containing 1	C1orf144	1	1p36.13
TARS2		80222	TARS2	threonyl-tRNA synthetase 2, mitochondrial (putative)	COXPD21|TARSL1|thrRS	1	1q21.3
TBC1D2B		23102	TBC1D2B	TBC1 domain family, member 2B	-	15	15q24.3-q25.1
TEX264		51368	TEX264	testis expressed 264	ZSIG11	3	3p21.31
THUMPD3		25917	THUMPD3	THUMP domain containing 3	-	3	3p25.3
TIMELESS		8914	TIMELESS	timeless circadian clock	TIM|TIM1|hTIM	12	12q13.3
TIMM22		29928	TIMM22	translocase of inner mitochondrial membrane 22 homolog (yeast)	TEX4|TIM22	17	17p13
TMCO6		55374	TMCO6	transmembrane and coiled-coil domains 6	PRO1580	5	5q31.3
TMEM41B		440026	TMEM41B	transmembrane protein 41B	-	11	11p15.4
TMEM70		54968	TMEM70	transmembrane protein 70	MC5DN2	8	8q21.11
TMUB1		83590	TMUB1	transmembrane and ubiquitin-like domain containing 1	C7orf21|DULP|SB144	7	7q36.1
TNIK		23043	TNIK	TRAF2 and NCK interacting kinase	-	3	3q26.31
TOMM34		10953	TOMM34	translocase of outer mitochondrial membrane 34	HTOM34P|TOM34|URCC3	20	-
TOMM40		10452	TOMM40	translocase of outer mitochondrial membrane 40 homolog (yeast)	C19orf1|D19S1177E|PER-EC1|PEREC1|TOM40	19	19q13
TOMM6		100188893	TOMM6	translocase of outer mitochondrial membrane 6 homolog (yeast)	OBTP|TOM6	6	6p21.1
TRAT1		50852	TRAT1	T cell receptor associated transmembrane adaptor 1	HSPC062|TCRIM|TRIM	3	3q13
TTC1		7265	TTC1	tetratricopeptide repeat domain 1	TPR1	5	5q33.3
TTC4		7268	TTC4	tetratricopeptide repeat domain 4	-	1	1p32.3
TUBGCP4		27229	TUBGCP4	tubulin, gamma complex associated protein 4	76P|GCP-4|GCP4|Grip76|MCCRP3	15	15q15
TXNIP		10628	TXNIP	thioredoxin interacting protein	EST01027|HHCPA78|THIF|VDUP1	1	1q21.1
TXNL4A		10907	TXNL4A	thioredoxin-like 4A	BMKS|DIB1|DIM1|SNRNP15|TXNL4|U5-15kD	18	18q23
UBE2C		11065	UBE2C	ubiquitin-conjugating enzyme E2C	UBCH10|dJ447F3.2	20	20q13.12
UNC119B		84747	UNC119B	unc-119 lipid binding chaperone B	POC7B	12	12q24.31
USP8		9101	USP8	ubiquitin specific peptidase 8	HumORF8|SPG59|UBPY	15	15q21.2
VAMP3		9341	VAMP3	vesicle-associated membrane protein 3	CEB	1	1p36.23
VAMP7		6845	VAMP7	vesicle-associated membrane protein 7	SYBL1|TI-VAMP|TIVAMP|VAMP-7	X|Y	Xq28 and Yq12
VPS52		6293	VPS52	vacuolar protein sorting 52 homolog (S. cerevisiae)	ARE1|SAC2|SACM2L|dJ1033B10.5	6	6p21.3
VTI1A		143187	VTI1A	vesicle transport through interaction with t-SNAREs 1A	MMDS3|MVti1|VTI1RP2|Vti1-rp2	10	10q25.2
WDHD1		11169	WDHD1	WD repeat and HMG-box DNA binding protein 1	AND-1|AND1|CHTF4|CTF4	14	14q22.2
WDR73		84942	WDR73	WD repeat domain 73	GAMOS|HSPC264	15	15q25.2
WDR76		79968	WDR76	WD repeat domain 76	CDW14	15	15q15.3
XPO6		23214	XPO6	exportin 6	EXP6|RANBP20	16	16p11.2
ZCCHC6		79670	ZCCHC6	zinc finger, CCHC domain containing 6	PAPD6|TUT7	9	9q21
ZFP36L1		677	ZFP36L1	ZFP36 ring finger protein-like 1	BRF1|Berg36|ERF-1|ERF1|RNF162B|TIS11B|cMG1	14	14q22-q24
ZMYND8		23613	ZMYND8	zinc finger, MYND-type containing 8	PRKCBP1|PRO2893|RACK7	20	20q13.12
ZWINT		11130	ZWINT	ZW10 interacting kinetochore protein	HZwint-1|KNTC2AP|SIP30|ZWINT1	10	10q21-q22
KRT6A		3853	KRT6A	keratin 6A, type II	CK6A|CK6C|CK6D|K6A|K6C|K6D|KRT6C|KRT6D|PC3	12	12q13.13
ACAD9		28976	ACAD9	acyl-CoA dehydrogenase family, member 9	NPD002	3	3q21.3
ADA		100	ADA	adenosine deaminase	-	20	20q13.12
ARHGEF7		8874	ARHGEF7	Rho guanine nucleotide exchange factor (GEF) 7	BETA-PIX|COOL-1|COOL1|Nbla10314|P50|P50BP|P85|P85COOL1|P85SPR|PAK3|PIXB	13	13q34
ARSA		410	ARSA	arylsulfatase A	MLD	22	22q13.33
BCL2L15		440603	BCL2L15	BCL2-like 15	Bfk|C1orf178	1	1p13.2
BLOC1S1		2647	BLOC1S1	biogenesis of lysosomal organelles complex-1, subunit 1	BLOS1|GCN5L1|MICoA|RT14	12	12q13-q14
CPT1A		1374	CPT1A	carnitine palmitoyltransferase 1A (liver)	CPT1|CPT1-L|L-CPT1	11	11q13.2
CST7		8530	CST7	cystatin F (leukocystatin)	CMAP	20	20p11.21
CYSTM1		84418	CYSTM1	cysteine-rich transmembrane module containing 1	C5orf32|ORF1-FL49	5	5q31.3
DSG1		1828	DSG1	desmoglein 1	CDHF4|DG1|DSG|EPKHE|EPKHIA|PPKS1|SPPK1	18	18q12.1
DTX3L		151636	DTX3L	deltex 3 like, E3 ubiquitin ligase	BBAP	3	3q21.1
FGR		2268	FGR	FGR proto-oncogene, Src family tyrosine kinase	SRC2|c-fgr|c-src2|p55-Fgr|p55c-fgr|p58-Fgr|p58c-fgr	1	1p36.2-p36.1
FUCA2		2519	FUCA2	fucosidase, alpha-L- 2, plasma	dJ20N2.5	6	6q24
GAA		2548	GAA	glucosidase, alpha; acid	LYAG	17	17q25.2-q25.3
GGH		8836	GGH	gamma-glutamyl hydrolase (conjugase, folylpolygammaglutamyl hydrolase)	GH	8	8q12.3
HS1BP3		64342	HS1BP3	HCLS1 binding protein 3	ETM2|HS1-BP3	2	2p24.1
IFIT1		3434	IFIT1	interferon-induced protein with tetratricopeptide repeats 1	C56|G10P1|IFI-56|IFI-56K|IFI56|IFIT-1|IFNAI1|ISG56|P56|RNM561	10	10q23.31
KLC4		89953	KLC4	kinesin light chain 4	KNSL8|bA387M24.3	6	6p21.1
KRT13		3860	KRT13	keratin 13, type I	CK13|K13|WSN2	17	17q21.2
KRT19		3880	KRT19	keratin 19, type I	CK19|K19|K1CS	17	17q21.2
LGMN		5641	LGMN	legumain	AEP|LGMN1|PRSC1	14	14q32.1
LRP1		4035	LRP1	low density lipoprotein receptor-related protein 1	A2MR|APOER|APR|CD91|IGFBP3R|LRP|LRP1A|TGFBR5	12	12q13.3
MAVS		57506	MAVS	mitochondrial antiviral signaling protein	CARDIF|IPS-1|IPS1|VISA	20	20p13
MYH2		4620	MYH2	myosin, heavy chain 2, skeletal muscle, adult	IBM3|MYH2A|MYHSA2|MYHas8|MYPOP|MyHC-2A|MyHC-IIa	17	17p13.1
NPL		80896	NPL	N-acetylneuraminate pyruvate lyase (dihydrodipicolinate synthase)	C112|C1orf13|NAL|NPL1	1	1q25
NUP37		79023	NUP37	nucleoporin 37kDa	p37	12	12q23.2
POLR2J		5439	POLR2J	polymerase (RNA) II (DNA directed) polypeptide J, 13.3kDa	POLR2J1|RPB11|RPB11A|RPB11m|hRPB14	7	7q22.1
PRTN3		5657	PRTN3	proteinase 3	ACPA|AGP7|C-ANCA|CANCA|MBN|MBT|NP-4|NP4|P29|PR-3|PR3	19	19p13.3
RAP1GAP2		23108	RAP1GAP2	RAP1 GTPase activating protein 2	GARNL4|RAP1GA3	17	17p13.3
SERPINB2		5055	SERPINB2	serpin peptidase inhibitor, clade B (ovalbumin), member 2	HsT1201|PAI|PAI-2|PAI2|PLANH2	18	18q21.3
STRADA		92335	STRADA	STE20-related kinase adaptor alpha	LYK5|NY-BR-96|PMSE|STRAD|Stlk	17	17q23.3
SYNE1		23345	SYNE1	spectrin repeat containing, nuclear envelope 1	8B|ARCA1|C6orf98|CPG2|EDMD4|MYNE1|Nesp1|SCAR8|dJ45H2.2	6	6q25
TMBIM1		64114	TMBIM1	transmembrane BAX inhibitor motif containing 1	LFG3|MST100|MSTP100|PP1201|RECS1	2	2q35
TSTD1		100131187	TSTD1	thiosulfate sulfurtransferase (rhodanese)-like domain containing 1	KAT	1	1q23.3
VAV2		7410	VAV2	vav 2 guanine nucleotide exchange factor	VAV-2	9	9q34.1
ABHD4		63874	ABHD4	abhydrolase domain containing 4	ABH4	14	14q11.2
AGBL3		340351	AGBL3	ATP/GTP binding protein-like 3	CCP3	7	7q33
BMI1		648	BMI1	BMI1 proto-oncogene, polycomb ring finger	FLVI2/BMI1|PCGF4|RNF51	10	10p11.23
BTNL2		56244	BTNL2	butyrophilin-like 2	BTL-II|BTN7|HSBLMHC1|SS2	6	6p21.3
CCDC9		26093	CCDC9	coiled-coil domain containing 9	-	19	19q13.32
CCNA2		890	CCNA2	cyclin A2	CCN1|CCNA	4	4q27
CD226		10666	CD226	CD226 molecule	DNAM-1|DNAM1|PTA1|TLiSA1	18	18q22.3
CEP170		9859	CEP170	centrosomal protein 170kDa	FAM68A|KAB|KIAA0470	1	1q44
CHST11		50515	CHST11	carbohydrate (chondroitin 4) sulfotransferase 11	C4ST|C4ST-1|C4ST1|HSA269537	12	12q
CLPB		81570	CLPB	ClpB homolog, mitochondrial AAA ATPase chaperonin	ANKCLB|HSP78|MEGCANN|MGCA7|SKD3	11	11q13.4
CSNK1G1		53944	CSNK1G1	casein kinase 1, gamma 1	CK1gamma1	15	15q22.1-q22.31
CUL3		8452	CUL3	cullin 3	CUL-3|PHA2E	2	2q36.2
DGCR8		54487	DGCR8	DGCR8 microprocessor complex subunit	C22orf12|DGCRK6|Gy1|pasha	22	22q11.2
DHCR7		1717	DHCR7	7-dehydrocholesterol reductase	SLOS	11	11q13.4
DPEP2		64174	DPEP2	dipeptidase 2	MBD2	16	16q22.1
ELOVL1		64834	ELOVL1	ELOVL fatty acid elongase 1	CGI-88|Ssc1	1	1p34.2
EZH1		2145	EZH1	enhancer of zeste 1 polycomb repressive complex 2 subunit	KMT6B	17	17q21.1-q21.3
FNBP4		23360	FNBP4	formin binding protein 4	FBP30	11	11p11.2
GEMIN6		79833	GEMIN6	gem (nuclear organelle) associated protein 6	-	2	2p22.1
GPHN		10243	GPHN	gephyrin	GEPH|GPH|GPHRYN|HKPX1|MOCODC	14	14q23.3
HERC6		55008	HERC6	HECT and RLD domain containing E3 ubiquitin protein ligase family member 6	-	4	4q22.1
ICOS		29851	ICOS	inducible T-cell co-stimulator	AILIM|CD278|CVID1	2	2q33
ITIH2		3698	ITIH2	inter-alpha-trypsin inhibitor heavy chain 2	H2P|SHAP	10	10p15
IVNS1ABP		10625	IVNS1ABP	influenza virus NS1A binding protein	FLARA3|HSPC068|KLHL39|ND1|NS-1|NS1-BP|NS1BP	1	1q25.1-q31.1
METTL13		51603	METTL13	methyltransferase like 13	5630401D24Rik|CGI-01|KIAA0859|feat	1	1q24-q25.3
MFF		56947	MFF	mitochondrial fission factor	C2orf33|GL004	2	2q36.3
MRPL28		10573	MRPL28	mitochondrial ribosomal protein L28	MAAT1|p15	16	16p13.3
NBN		4683	NBN	nibrin	AT-V1|AT-V2|ATV|NBS|NBS1|P95	8	8q21
NEDD9		4739	NEDD9	neural precursor cell expressed, developmentally down-regulated 9	CAS-L|CAS2|CASL|CASS2|HEF1	6	6p24.2
PLP2		5355	PLP2	proteolipid protein 2 (colonic epithelium-enriched)	A4|A4LSB	X	Xp11.23
PMVK		10654	PMVK	phosphomevalonate kinase	HUMPMKI|PMK|PMKA|PMKASE	1	1q22
PTPRJ		5795	PTPRJ	protein tyrosine phosphatase, receptor type, J	CD148|DEP1|HPTPeta|R-PTP-ETA|SCC1	11	11p11.2
RCL1		10171	RCL1	RNA terminal phosphate cyclase-like 1	RNAC|RPCL1	9	9p24.1-p23
RFX1		5989	RFX1	regulatory factor X, 1 (influences HLA class II expression)	EFC|RFX	19	19p13.1
RINT1		60561	RINT1	RAD50 interactor 1	RINT-1	7	7q22.3
RPS15A		6210	RPS15A	ribosomal protein S15a	S15a	16	16p
SAP130		79595	SAP130	Sin3A-associated protein, 130kDa	-	2	2q14.3
TGFB3		7043	TGFB3	transforming growth factor, beta 3	ARVD|ARVD1|RNHF|TGF-beta3	14	14q24
THADA		63892	THADA	thyroid adenoma associated	GITA	2	2p21
TUBAL3		79861	TUBAL3	tubulin, alpha-like 3	-	10	10p15.1
VWA9		81556	VWA9	von Willebrand factor A domain containing 9	C15orf44	15	15q22.31
WDR46		9277	WDR46	WD repeat domain 46	BING4|C6orf11|FP221|UTP7	6	6p21.3
ZNF740		283337	ZNF740	zinc finger protein 740	Zfp740	12	12q13.13
ZNRF2		223082	ZNRF2	zinc and ring finger 2, E3 ubiquitin protein ligase	RNF202	7	7p14.3
AP1S2		8905	AP1S2	adaptor-related protein complex 1, sigma 2 subunit	DC22|MRX59|MRXS21|MRXS5|MRXSF|PGS|SIGMA1B	X	Xp22.2
ARHGEF15		22899	ARHGEF15	Rho guanine nucleotide exchange factor (GEF) 15	ARGEF15|E5|Ephexin5|Vsm-RhoGEF	17	17p13.1
CCDC94		55702	CCDC94	coiled-coil domain containing 94	-	19	19p13.3
DNASE1		1773	DNASE1	deoxyribonuclease I	DNL1|DRNI	16	16p13.3
DSN1		79980	DSN1	DSN1 homolog, MIS12 kinetochore complex component	C20orf172|KNL3|MIS13|dJ469A13.2|hKNL-3	20	20q11.23
LRP5		4041	LRP5	low density lipoprotein receptor-related protein 5	BMND1|EVR1|EVR4|HBM|LR3|LRP-5|LRP7|OPPG|OPS|OPTA1|VBCH2	11	11q13.4
MKRN3		7681	MKRN3	makorin ring finger protein 3	CPPB2|D15S9|RNF63|ZFP127|ZNF127	15	15q11-q13
MYO5C		55930	MYO5C	myosin VC	-	15	15q21
P2RY12		64805	P2RY12	purinergic receptor P2Y, G-protein coupled, 12	ADPG-R|BDPLT8|HORK3|P2T(AC)|P2Y(12)R|P2Y(AC)|P2Y(ADP)|P2Y(cyc)|P2Y12|SP1999	3	3q25.1
PDPR		55066	PDPR	pyruvate dehydrogenase phosphatase regulatory subunit	PDP3	16	16q22.1
S100A2		6273	S100A2	S100 calcium binding protein A2	CAN19|S100L	1	1q21
ST6GALNAC2		10610	ST6GALNAC2	ST6 (alpha-N-acetyl-neuraminyl-2,3-beta-galactosyl-1,3)-N-acetylgalactosaminide alpha-2,6-sialyltransferase 2	SAITL1|SIAT7|SIAT7B|SIATL1|ST6GalNAII|STHM	17	17q25.1
FCGR2B		2213	FCGR2B	Fc fragment of IgG, low affinity IIb, receptor (CD32)	CD32|CD32B|FCG2|FCGR2|IGFR2	1	1q23
KRT75		9119	KRT75	keratin 75, type II	K6HF|KB18|PFB	12	12q13
DRP2		1821	DRP2	dystrophin related protein 2	DRP-2	X	Xq22
KRT5		3852	KRT5	keratin 5, type II	CK5|DDD|DDD1|EBS2|K5|KRT5A	12	12q13.13
UTP3		57050	UTP3	UTP3, small subunit (SSU) processome component, homolog (S. cerevisiae)	CRL1|CRLZ1|SAS10	4	4q13.3
KRT82		3888	KRT82	keratin 82, type II	HB2|Hb-2|KRTHB2	12	12q13
KRT79		338785	KRT79	keratin 79, type II	K6L|KRT6L	12	12q13.13
NAAA		27163	NAAA	N-acylethanolamine acid amidase	ASAHL|PLT	4	4q21.1
ARVCF		421	ARVCF	armadillo repeat gene deleted in velocardiofacial syndrome	-	22	22q11.21
KRT3		3850	KRT3	keratin 3, type II	CK3|K3	12	12q13.13
KRT18		3875	KRT18	keratin 18, type I	CYK18|K18	12	12q13
DAB2		1601	DAB2	Dab, mitogen-responsive phosphoprotein, homolog 2 (Drosophila)	DOC-2|DOC2	5	5p13.1
KRT36		8689	KRT36	keratin 36, type I	HA6|KRTHA6|hHa6	17	17q21.2
ALB		213	ALB	albumin	ANALBA|FDAH|PRO0883|PRO0903|PRO1341	4	4q13.3
RRM1		6240	RRM1	ribonucleotide reductase M1	R1|RIR1|RR1	11	11p15.5
CTSZ		1522	CTSZ	cathepsin Z	CTSX	20	20q13.32
KRT8		3856	KRT8	keratin 8, type II	CARD2|CK-8|CK8|CYK8|K2C8|K8|KO	12	12q13
DUT		1854	DUT	deoxyuridine triphosphatase	dUTPase	15	15q21.1
KRT77		374454	KRT77	keratin 77, type II	K1B|KRT1B	12	12q13.13
IL2RA		3559	IL2RA	interleukin 2 receptor, alpha	CD25|IDDM10|IL2R|TCGFR|p55	10	10p15-p14
KRT4		3851	KRT4	keratin 4, type II	CK-4|CK4|CYK4|K4|WSN1	12	12q13.13
UHRF1		29128	UHRF1	ubiquitin-like with PHD and ring finger domains 1	ICBP90|Np95|RNF106|hNP95|hUHRF1|huNp95	19	19p13.3
AZU1		566	AZU1	azurocidin 1	AZAMP|AZU|CAP37|HBP|HUMAZUR|NAZC	19	19p13.3
TYMS		7298	TYMS	thymidylate synthetase	HST422|TMS|TS	18	18p11.32
CTSH		1512	CTSH	cathepsin H	ACC-4|ACC-5|ACC4|ACC5|CPSB|minichain	15	15q25.1
ADAMTSL4		54507	ADAMTSL4	ADAMTS-like 4	ADAMTSL-4|ECTOL2|TSRC1	1	1q21.3
FLG2		388698	FLG2	filaggrin family member 2	IFPS	1	1q21.3
CEP128		145508	CEP128	centrosomal protein 128kDa	C14orf145|C14orf61|LEDP/132	14	14q31.1
ASNS		440	ASNS	asparagine synthetase (glutamine-hydrolyzing)	ASNSD|TS11	7	7q21.3
HARS2		23438	HARS2	histidyl-tRNA synthetase 2, mitochondrial	HARSL|HARSR|HO3|PRLTS2	5	5q31.3
RPL38		6169	RPL38	ribosomal protein L38	L38	17	17q25.1
KRT10		3858	KRT10	keratin 10, type I	BCIE|BIE|CK10|EHK|K10|KPP	17	17q21
NPM3		10360	NPM3	nucleophosmin/nucleoplasmin 3	PORMIN|TMEM123	10	10q24.31
JUP		3728	JUP	junction plakoglobin	ARVD12|CTNNG|DP3|DPIII|PDGB|PKGB	17	17q21
IFI30		10437	IFI30	interferon, gamma-inducible protein 30	GILT|IFI-30|IP-30|IP30	19	19p13.1
ACSL4		2182	ACSL4	acyl-CoA synthetase long-chain family member 4	ACS4|FACL4|LACS4|MRX63|MRX68	X	Xq22.3-q23
SLC16A3		9123	SLC16A3	solute carrier family 16 (monocarboxylate transporter), member 3	MCT 3|MCT 4|MCT-3|MCT-4|MCT3|MCT4	17	17q25
KPNA2		3838	KPNA2	karyopherin alpha 2 (RAG cohort 1, importin alpha 1)	IPOA1|QIP2|RCH1|SRP1alpha	17	17q24.2
NOLC1		9221	NOLC1	nucleolar and coiled-body phosphoprotein 1	NOPP130|NOPP140|NS5ATP13|P130	10	10q24.32
RNASET2		8635	RNASET2	ribonuclease T2	RNASE6PL|bA514O12.3	6	6q27
CEP85		64793	CEP85	centrosomal protein 85kDa	CCDC21	1	1p36.11
BLOC1S4		55330	BLOC1S4	biogenesis of lysosomal organelles complex-1, subunit 4, cappuccino	BCAS4L|BLOS4|CNO	4	4p16.1
UBAP2L		9898	UBAP2L	ubiquitin associated protein 2-like	NICE-4	1	1q21.3
F13A1		2162	F13A1	coagulation factor XIII, A1 polypeptide	F13A	6	6p25.3-p24.3
FUCA1		2517	FUCA1	fucosidase, alpha-L- 1, tissue	FUCA	1	1p34
RNASE6		6039	RNASE6	ribonuclease, RNase A family, k6	RAD1|RNS6|RNasek6	14	14q11.2
MCM3		4172	MCM3	minichromosome maintenance complex component 3	HCC5|P1-MCM3|P1.h|RLFB	6	6p12
ALOX15		246	ALOX15	arachidonate 15-lipoxygenase	12-LOX|15-LOX-1|15LOX-1	17	17p13.3
RFC5		5985	RFC5	replication factor C (activator 1) 5, 36.5kDa	RFC36	12	12q24.23
ASF1B		55723	ASF1B	anti-silencing function 1B histone chaperone	CIA-II	19	19p13.12
MCM4		4173	MCM4	minichromosome maintenance complex component 4	CDC21|CDC54|NKCD|NKGCD|P1-CDC21|hCdc21	8	8q11.2
PBK		55872	PBK	PDZ binding kinase	CT84|HEL164|Nori-3|SPK|TOPK	8	8p21.2
ELANE		1991	ELANE	elastase, neutrophil expressed	ELA2|GE|HLE|HNE|NE|PMN-E|SCN1	19	19p13.3
MCM2		4171	MCM2	minichromosome maintenance complex component 2	BM28|CCNL1|CDCL1|D3S3194|MITOTIN|cdc19	3	3q21
AK4		205	AK4	adenylate kinase 4	AK 4|AK3|AK3L1|AK3L2	1	1p31.3
PAPSS2		9060	PAPSS2	3'-phosphoadenosine 5'-phosphosulfate synthase 2	ATPSK2|BCYM4|SK2	10	10q24
STMN2		11075	STMN2	stathmin 2	SCG10|SCGN10	8	8q21.13
KRT14		3861	KRT14	keratin 14, type I	CK14|EBS3|EBS4|K14|NFJ	17	17q21.2
TJP3		27134	TJP3	tight junction protein 3	ZO-3|ZO3	19	19p13.3
TOP2A		7153	TOP2A	topoisomerase (DNA) II alpha 170kDa	TOP2|TP2A	17	17q21-q22
CDK2		1017	CDK2	cyclin-dependent kinase 2	CDKN2|p33(CDK2)	12	12q13
MSRA		4482	MSRA	methionine sulfoxide reductase A	PMSR	8	8p23.1
LGALS3		3958	LGALS3	lectin, galactoside-binding, soluble, 3	CBP35|GAL3|GALBP|GALIG|L31|LGALS2|MAC2	14	14q22.3
SELENBP1		8991	SELENBP1	selenium binding protein 1	HEL-S-134P|LPSB|SBP56|SP56|hSBP	1	1q21.3
HEXB		3074	HEXB	hexosaminidase B (beta polypeptide)	ENC-1AS|HEL-248	5	5q13
HBD		3045	HBD	hemoglobin, delta	-	11	11p15.5
NPC2		10577	NPC2	Niemann-Pick disease, type C2	EDDM1|HE1	14	14q24.3
CTSA		5476	CTSA	cathepsin A	GLB2|GSL|NGBE|PPCA|PPGB	20	20q13.1
SCD		6319	SCD	stearoyl-CoA desaturase (delta-9-desaturase)	FADS5|MSTP008|SCD1|SCDOS	10	10q24.31
CTSC		1075	CTSC	cathepsin C	CPPI|DPP-I|DPP1|DPPI|HMS|JP|JPD|PALS|PDON1|PLS	11	11q14.2
KRT1		3848	KRT1	keratin 1, type II	CK1|EHK|EHK1|EPPK|K1|KRT1A|NEPPK	12	12q13.13
PCNA		5111	PCNA	proliferating cell nuclear antigen	ATLD2	20	20pter-p12
FASN		2194	FASN	fatty acid synthase	FAS|OA-519|SDR27X1	17	17q25
UBASH3B		84959	UBASH3B	ubiquitin associated and SH3 domain containing B	STS-1|STS1|TULA-2|TULA2|p70	11	11q24.1
SKAP2		8935	SKAP2	src kinase associated phosphoprotein 2	PRAP|RA70|SAPS|SCAP2|SKAP-HOM|SKAP55R	7	7p15.2
CA2		760	CA2	carbonic anhydrase II	CA-II|CAC|CAII|Car2|HEL-76	8	8q22
CAMP		820	CAMP	cathelicidin antimicrobial peptide	CAP-18|CAP18|CRAMP|FALL-39|FALL39|HSD26|LL37	3	3p21.3
RBM3		5935	RBM3	RNA binding motif (RNP1, RRM) protein 3	IS1-RNPL|RNPL	X	Xp11.2
HNMT		3176	HNMT	histamine N-methyltransferase	HMT|HNMT-S1|HNMT-S2	2	2q22.1
MCM5		4174	MCM5	minichromosome maintenance complex component 5	CDC46|P1-CDC46	22	22q13.1
KIAA0196		9897	KIAA0196	KIAA0196	RTSC|SPG8	8	8q24.13
MAN2A2		4122	MAN2A2	mannosidase, alpha, class 2A, member 2	MANA2X	15	15q26.1
TRMT10C		54931	TRMT10C	tRNA methyltransferase 10 homolog C (S. cerevisiae)	HNYA|MRPP1|RG9MTD1	3	3q12.3
HMGCS1		3157	HMGCS1	3-hydroxy-3-methylglutaryl-CoA synthase 1 (soluble)	HMGCS	5	5p14-p13
BRE		9577	BRE	brain and reproductive organ-expressed (TNFRSF1A modulator)	BRCC4|BRCC45	2	2p23.2
PPIF		10105	PPIF	peptidylprolyl isomerase F	CYP3|CyP-M|Cyp-D|CypD	10	10q22.3
POLA2		23649	POLA2	polymerase (DNA directed), alpha 2, accessory subunit	-	11	11q13.1
YBX1		4904	YBX1	Y box binding protein 1	BP-8|CSDA2|CSDB|DBPB|MDR-NF1|NSEP-1|NSEP1|YB-1|YB1	1	1p34
CTSB		1508	CTSB	cathepsin B	APPS|CPSB	8	8p22
CTSS		1520	CTSS	cathepsin S	-	1	1q21
HN1L		90861	HN1L	hematological and neurological expressed 1-like	C16orf34|L11	16	16p13.3
ASAH1		427	ASAH1	N-acylsphingosine amidohydrolase (acid ceramidase) 1	AC|ACDase|ASAH|PHP|PHP32|SMAPME	8	8p22
MTHFD2		10797	MTHFD2	methylenetetrahydrofolate dehydrogenase (NADP+ dependent) 2, methenyltetrahydrofolate cyclohydrolase	NMDMC	2	2p13.1
MRC1		4360	MRC1	mannose receptor, C type 1	CD206|CLEC13D|CLEC13DL|MMR|MRC1L1|bA541I19.1	10	10p12.33
CA1		759	CA1	carbonic anhydrase I	CA-I|CAB|Car1|HEL-S-11	8	8q21.2
PAK1IP1		55003	PAK1IP1	PAK1 interacting protein 1	MAK11|PIP1|WDR84|bA421M1.5|hPIP1	6	6p24.2
MRTO4		51154	MRTO4	MRT4 homolog, ribosome maturation factor	C1orf33|MRT4|dJ657E11.4	1	1p36.13
SERPINB10		5273	SERPINB10	serpin peptidase inhibitor, clade B (ovalbumin), member 10	PI-10|PI10	18	18q21.3
PPT1		5538	PPT1	palmitoyl-protein thioesterase 1	CLN1|INCL|PPT	1	1p32
IL1B		3553	IL1B	interleukin 1, beta	IL-1|IL1-BETA|IL1F2	2	2q14
SEMA4A		64218	SEMA4A	sema domain, immunoglobulin domain (Ig), transmembrane domain (TM) and short cytoplasmic domain, (semaphorin) 4A	CORD10|RP35|SEMAB|SEMB	1	1q22
SSH1		54434	SSH1	slingshot protein phosphatase 1	SSH1L	12	12q24.11
THY1		7070	THY1	Thy-1 cell surface antigen	CD90	11	11q23.3
PRPSAP1		5635	PRPSAP1	phosphoribosyl pyrophosphate synthetase-associated protein 1	PAP39	17	17q24-q25
RORA		6095	RORA	RAR-related orphan receptor A	NR1F1|ROR1|ROR2|ROR3|RZR-ALPHA|RZRA	15	15q22.2
OCSTAMP		128506	OCSTAMP	osteoclast stimulatory transmembrane protein	C20orf123|OC-STAMP|dJ257E24.3	20	20q13.12
CD14		929	CD14	CD14 molecule	-	5	5q31.1
CREG1		8804	CREG1	cellular repressor of E1A-stimulated genes 1	CREG	1	1q24
GALM		130589	GALM	galactose mutarotase (aldose 1-epimerase)	BLOCK25|GLAT|HEL-S-63p|IBD1	2	2p22.1
APOBR		55911	APOBR	apolipoprotein B receptor	APOB100R|APOB48R	16	16p11
HEXA		3073	HEXA	hexosaminidase A (alpha polypeptide)	TSD	15	15q24.1
SLC2A3		6515	SLC2A3	solute carrier family 2 (facilitated glucose transporter), member 3	GLUT3	12	12p13.3
CELA3A		10136	CELA3A	chymotrypsin-like elastase family, member 3A	ELA3|ELA3A	1	1p36.12
ANXA1		301	ANXA1	annexin A1	ANX1|LPC1	9	9q21.13
CSTB		1476	CSTB	cystatin B (stefin B)	CST6|EPM1|EPM1A|PME|STFB|ULD	21	21q22.3
FTL		2512	FTL	ferritin, light polypeptide	LFTD|NBIA3	19	19q13.33
CD320		51293	CD320	CD320 molecule	8D6|8D6A|TCBLR	19	19p13.3-p13.2
GALNS		2588	GALNS	galactosamine (N-acetyl)-6-sulfatase	GALNAC6S|GAS|GalN6S|MPS4A	16	16q24.3
SMPDL3A		10924	SMPDL3A	sphingomyelin phosphodiesterase, acid-like 3A	ASM3A|ASML3a|yR36GH4.1	6	6q22.31
SEPT3		55964	SEPT3	septin 3	SEP3|bK250D10.3	22	22q13.2
ACAD8		27034	ACAD8	acyl-CoA dehydrogenase family, member 8	ACAD-8|ARC42	11	11q25
TGM3		7053	TGM3	transglutaminase 3	TGE	20	20q11.2
PCNP		57092	PCNP	PEST proteolytic signal containing nuclear protein	-	3	3q12.3
STK38		11329	STK38	serine/threonine kinase 38	NDR|NDR1	6	6p21
ITGAM		3684	ITGAM	integrin, alpha M (complement component 3 receptor 3 subunit)	CD11B|CR3A|MAC-1|MAC1A|MO1A|SLEB6	16	16p11.2
NAGA		4668	NAGA	N-acetylgalactosaminidase, alpha-	D22S674|GALB	22	22q11
MRPS9		64965	MRPS9	mitochondrial ribosomal protein S9	MRP-S9|RPMS9|S9mt	2	2q12.1

## Sheet: Cellular component
Analysis: Cellular component
Dataset name: LysateBanLecp005
Number of genes in the dataset: 444
Number of genes in the dataset (which are available in Cellular component database) :399
Number of genes in background: 14553
Is analysis quantitative: No
						Corrected p-values
Cellular component	No. of genes in the dataset	No. of genes in the background dataset	Percentage of genes	Fold enrichment	P-value (Hypergeometric test)	Bonferroni method	BH method	Q-value (Storey-Tibshirani method)	genes mapped (from input data set)
Intermediate filament	11	36	2.75689	11.1515	1.86095e-09	1.45898e-06	1.11819e-06	5.94622e-06	DES; KRT6A; KRT19; KRT5; KRT3; KRT18; KRT8; KRT4; KRT10; KRT14; KRT1;
Nucleolus	71	1257	17.7945	2.06039	2.85254e-09	2.23639e-06	1.11819e-06	5.94622e-06	ATM; AURKB; CDK1; CDK13; DCAF13; DDX10; DDX18; DDX31; ETV6; FANCI; FCF1; FTSJ3; FUBP1; GRSF1; IMP3; ISY1; KAT7; KDM3B; MIER1; MORF4L1; NCAPD3; NMD3; NOB1; NOC2L; NOP14; NSA2; NTMT1; ORC4; POLA1; RAD9A; REXO4; RIF1; SDAD1; SMC2; SMN1; STX5; TNIK; WDHD1; IFIT1; MYH2; SYNE1; DGCR8; EZH1; NBN; RCL1; RPS15A; WDR46; UTP3; KRT18; KRT8; TYMS; RPL38; KRT10; NPM3; JUP; KPNA2; NOLC1; MCM3; RFC5; MCM4; MCM2;…
Nucleoplasm	32	449	8.02005	2.60015	8.08839e-07	0.00063413	0.000179079	0.000952286	ANAPC4; ATM; CDK1; CHAF1B; CHEK1; DSCC1; FANCD2; FANCI; GTF2H4; KAT7; KIF23; ORC4; PHAX; POLA1; RB1; UBE2C; WDHD1; POLR2J; CCNA2; GEMIN6; IVNS1ABP; NBN; KPNA2; MCM3; RFC5; MCM4; MCM2; TOP2A; CDK2; PCNA; MCM5; POLA2;
Mitochondrion	64	1259	16.0401	1.85433	9.13666e-07	0.000716314	0.000179079	0.000952286	ABCB8; ABCD3; AURKB; BCKDHB; BCL2; BCL2L1; CASP2; CDK1; CEND1; CHAF1B; COX6A1; FANCD2; FANCI; GRSF1; HCCS; HIGD1A; KIF1BP; KIF4A; MMAB; MRPL2; MRPL24; MRPL47; MRPL54; MRPS18B; MRPS21; MRPS26; NCAPD3; NDUFAF3; NUFIP2; OXA1L; PDK3; PYCR1; SMC2; SYNJ2BP; TIMM22; TMEM70; TOMM34; TOMM40; ACAD9; CPT1A; LGMN; MFF; MRPL28; PDPR; DUT; UHRF1; AZU1; TYMS; CTSH; ACSL4; MCM3; RFC5; AK4; MSRA; SCD; CTSC; FASN;…
Cytoplasm	201	5684	50.3759	1.28983	2.17876e-06	0.00170815	0.00034163	0.00181669	ABCC1; ANKHD1; ARPP19; ASAP2; ATM; AUP1; BCL2; BCL2L1; BORA; C9orf78; CASP2; CD82; CDK1; CDK13; CDK2AP1; CDK6; CEBPB; CELF1; CHAF1B; CKAP2; CLUH; COG4; CRTC2; DDX19B; DES; DLG1; DUS3L; DUSP12; EBP; EHMT2; EIF4EBP1; EIF4ENIF1; ETV6; F8A1; FBXO7; FBXW11; FTSJ3; FUBP1; GRIPAP1; GRSF1; HDAC3; HN1; INTS2; IPO11; ISY1; KAT7; KDM3B; KIF23; KIF4A; KLF13; LARP4B; LIMS1; LPGAT1; MIER1; MRPL2; MYL12B; MYO9B…
Keratin filament	4	5	1.00251	29.1928	2.7236e-06	0.00213531	0.000355884	0.00189249	KRT5; KRT3; KRT18; KRT14;
Lysosome	71	1620	17.7945	1.59871	3.97254e-05	0.0311447	0.00444925	0.0236598	ABCC1; ABCD3; CD82; HLA-DRB1; LIN7C; MAN2A1; PFN2; PLCB3; PSMD5; RAC1; SEC24B; STX5; TIMM22; USP8; VAMP7; VTI1A; ADA; ARSA; BLOC1S1; CST7; DSG1; FUCA2; GAA; GGH; LGMN; LRP1; PRTN3; SERPINB2; TMBIM1; CUL3; PTPRJ; ZNRF2; NAAA; DAB2; ALB; CTSZ; AZU1; CTSH; ADAMTSL4; JUP; IFI30; ACSL4; SLC16A3; F13A1; FUCA1; ELANE; LGALS3; HEXB; HBD; NPC2; CTSA; CTSC; CA2; KIAA0196; MAN2A2; PPIF; CTSB; CTSS; ASAH1; M…
Nucleus	198	5847	49.6241	1.23516	6.72602e-05	0.052732	0.0065915	0.0350517	ANAPC4; ATM; BCL2; BCL2L1; BORA; C21orf59; C9orf78; CAAP1; CASP2; CCNK; CDK1; CDK12; CDK13; CDK2AP1; CDK6; CDV3; CEBPB; CELF1; CENPH; CENPK; CHAF1B; CHEK1; CHTF18; CLK3; CRTC2; DDX10; DDX18; DDX19B; DDX31; DHCR24; DLG1; DSCC1; DUSP12; EHMT2; EIF4EBP1; EIF4ENIF1; ETV6; F8A1; FAM162A; FAM98A; FANCD2; FANCI; FBXO7; FBXW11; FTSJ3; FUBP1; GRIPAP1; GTF2H4; HDAC3; HN1; IMP3; INTS2; IPO11; ISY1; KAT7; KD…
Exosomes	83	2043	20.802	1.48193	0.000116848	0.0916088	0.0101788	0.0541276	ABCC1; AUP1; BRI3BP; CD82; CDK1; CRTC2; DDX19B; DHX36; DLG1; GBP6; HLA-DRB1; LIN7C; MAN1A1; MAN2A1; MYL12B; PFN2; PRKCA; PSAT1; RAC1; SMC2; TNIK; VAMP3; VAMP7; KRT6A; CYSTM1; FGR; GAA; GGH; KRT13; KRT19; LRP1; PRTN3; SYNE1; TMBIM1; CUL3; DHCR7; ITIH2; PMVK; PTPRJ; RPS15A; KRT75; KRT5; KRT79; ARVCF; KRT3; KRT18; ALB; KRT8; DUT; KRT77; KRT4; AZU1; ASNS; KRT10; JUP; ACSL4; FUCA1; ELANE; KRT14; MSRA;…
Mitochondrial small ribosomal subunit	4	17	1.00251	8.59823	0.000997646	0.782154	0.0782154	0.415926	MRPS18B; MRPS21; MRPS26; MRPS9;
Plasma membrane	65	3479	16.2907	0.681543	0.999934	1	1	1	ABCC1; ASAP2; CCR4; CD69; CD82; CDC42SE2; DHCR24; DHX36; DLG1; DLGAP4; HLA-DRB1; LAG3; MMP14; PRKCA; RAC1; TRAT1; VAMP3; VAMP7; ADA; ARHGEF7; DSG1; GGH; KRT13; LRP1; PRTN3; CD226; ICOS; NEDD9; PLP2; PTPRJ; LRP5; MYO5C; P2RY12; FCGR2B; DRP2; ARVCF; IL2RA; AZU1; JUP; SLC16A3; KPNA2; FUCA1; ALOX15; ELANE; TJP3; LGALS3; SELENBP1; KRT1; SKAP2; CA2; MAN2A2; CTSB; CTSS; MRC1; IL1B; SEMA4A; SSH1; THY1; C…
ER-Golgi intermediate compartment	1	30	0.250627	1.22751	0.566056	1	1	1	MAN1A1;
Integral to membrane	14	1702	3.50877	0.300224	1	1	1	1	ABCC1; LEMD2; SLC35E1; TMEM41B; TMUB1; TOMM34; VAMP3; VTI1A; SYNE1; CHST11; ICOS; MFF; LRP5; FCGR2B;
Integral to plasma membrane	14	934	3.50877	0.547086	0.99658	1	1	1	ABCC1; CCR4; CD69; CD82; EBP; HLA-DRB1; MMP14; TRAT1; LRP1; CD226; PTPRJ; SLC16A3; MRC1; THY1;
Golgi aparatus	27	897	6.76692	1.09824	0.334767	1	1	1	ASAP2; CASP2; COG4; MAN1A1; MAN2A1; NUFIP2; STX5; VAMP7; LRP1; SYNE1; CHST11; CUL3; NBN; NEDD9; AP1S2; ST6GALNAC2; STMN2; SELENBP1; HEXB; CTSA; FASN; CA2; CTSS; MRC1; PPT1; CD14; CREG1;
Perinuclear region of cytoplasm	2	119	0.501253	0.616001	0.841844	1	1	1	MYO9B; STMN2;
Actin cytoskeleton	3	132	0.75188	0.831627	0.705845	1	1	1	MYO9B; PFN2; SEPT3;
Ribonucleoprotein complex	3	65	0.75188	1.68871	0.263609	1	1	1	CELF1; MKRN3; YBX1;
Cytosolic small ribosomal subunit	2	36	0.501253	2.03583	0.259354	1	1	1	RPS15A; FTL;
Cytosol	42	1178	10.5263	1.30069	0.0472935	1	1	1	ANAPC4; BCL2; BCL2L1; C21orf59; CASP2; CDK1; CHAF1B; DLG1; DLGAP4; EIF4EBP1; GALT; LIMS1; PHAX; PLCB3; PRKCA; PSAT1; PUM1; RAC1; RFK; RGS3; SMN1; TUBGCP4; UBE2C; USP8; ADA; ARHGEF7; DSG1; VAV2; GEMIN6; GPHN; RPS15A; AP1S2; KRT5; ASNS; RPL38; KRT14; CDK2; FASN; HNMT; HMGCS1; BRE; FTL;
Ribosome	5	144	1.25313	1.26886	0.360781	1	1	1	NSA2; PRMT3; QTRT1; RPS15A; RPL38;
Membrane fraction	13	346	3.25815	1.37138	0.156875	1	1	1	ABCB8; ABCC1; DLG1; GRIPAP1; MAN1A1; PRKCA; RAC1; RGS3; LRP1; PLP2; SLC16A3; STMN2; PPIF;
Perinuclear region	3	131	0.75188	0.837975	0.700967	1	1	1	EIF4ENIF1; PRKCA; CTSB;
Midbody	2	19	0.501253	3.85641	0.0944011	1	1	1	CDK1; KIF23;
Chromatin	4	32	1.00251	4.56907	0.0109098	1	0.475181	1	DSCC1; POLA1; RB1; MCM2;
Endoplasmic reticulum	30	1104	7.5188	0.99143	0.548556	1	1	1	BCL2; CYP51A1; DHCR24; EBP; LPGAT1; MAN1A1; NDC1; PRKCA; SOAT1; STX5; TMEM41B; LRP1; CCNA2; DHCR7; NEDD9; PLP2; RINT1; DNASE1; CTSZ; CTSH; HEXB; CTSA; SCD; CTSB; CTSS; MRC1; THY1; CD14; CREG1; CD320;
Secretory granule	1	50	0.250627	0.736603	0.751515	1	1	1	CAMP;
Endosome	8	303	2.00501	0.96415	0.593319	1	1	1	GRIPAP1; HLA-DRB1; VAMP7; LRP1; CCNA2; ZNRF2; CTSS; CD14;
Holo TFIIH complex	1	11	0.250627	3.34582	0.263544	1	1	1	GTF2H4;
Cell surface	6	205	1.50376	1.06922	0.493795	1	1	1	CD69; VAMP7; ADA; CD226; ELANE; CD14;
Extracellular	56	1825	14.0351	1.11936	0.199586	1	1	1	CD69; CD82; CKAP2; DES; GALT; KIF23; KIF4A; KLF13; LIN7C; MMP14; NCAPD3; PLCB3; POLA1; PRCC; PSMD5; RRM2; TEX264; ADA; ARSA; CST7; DSG1; GGH; LRP1; MYH2; SERPINB2; CUL3; ITIH2; NBN; PTPRJ; TGFB3; DNASE1; KRT18; ALB; KRT8; AZU1; FLG2; JUP; RNASET2; F13A1; RNASE6; ELANE; LGALS3; HEXB; HBD; CTSA; CTSC; CA2; CAMP; CTSB; CTSS; IL1B; CD14; CREG1; CELA3A; TGM3; NAGA;
Kinetochore	8	90	2.00501	3.24572	0.00325369	1	0.17006	0.904326	CENPH; GTF2H4; NDEL1; SPC25; ZWINT; NUP37; DSN1; TOP2A;
Extracellular region	16	442	4.01003	1.32108	0.157916	1	1	1	ITIH2; TGFB3; DNASE1; ALB; AZU1; IFI30; RNASET2; F13A1; RNASE6; ELANE; CTSS; PPT1; IL1B; CD14; ANXA1; SMPDL3A;
Golgi transport complex	1	9	0.250627	4.08852	0.221408	1	1	1	COG4;
BRISC complex	1	4	0.250627	9.18641	0.10525	1	1	1	BRE;
Integrin complex	1	22	0.250627	1.67367	0.457759	1	1	1	ITGAM;
Internal side of plasma membrane	1	8	0.250627	4.59894	0.199448	1	1	1	DSG1;
Nuclear pore	2	42	0.501253	1.74507	0.3206	1	1	1	DDX19B; NDC1;
Membrane	13	350	3.25815	1.35571	0.166288	1	1	1	ABCC1; BCL2; HLA-DRB1; MMP14; SOAT1; ADA; LRP1; DHCR7; PLP2; P2RY12; SLC16A3; KRT1; THY1;
PML body	1	37	0.250627	0.99534	0.642953	1	1	1	RB1;
Extracellular space	3	404	0.75188	0.271734	0.999085	1	1	1	ALB; CTSZ; IL1B;
Extracellular matrix	3	120	0.75188	0.914783	0.643254	1	1	1	PRTN3; TGFB3; LGALS3;
Endoplasmic reticulum membrane	5	150	1.25313	1.21811	0.393522	1	1	1	CYP51A1; DHCR24; SOAT1; DHCR7; PLP2;
Ubiquitin ligase complex	3	43	0.75188	2.5525	0.113235	1	1	1	FBXO7; FBXW11; BMI1;
NuA4 histone acetyltransferase complex	1	14	0.250627	2.62937	0.32252	1	1	1	MORF4L1;
Dendrite	1	27	0.250627	1.36385	0.528237	1	1	1	GPHN;
Centrosome	28	656	7.01754	1.5573	0.013783	1	0.536561	1	AURKB; CDK1; CDK6; CENPH; KIF23; NDEL1; PSAT1; PYCR1; SEC24B; TUBGCP4; CCNA2; CEP170; RPS15A; KRT5; CEP128; ASNS; RPL38; KRT10; KPNA2; MCM3; MCM4; KRT14; KRT1; PCNA; FASN; UBASH3B; HMGCS1; YBX1;
Soluble fraction	3	180	0.75188	0.609872	0.874893	1	1	1	ASNS; STMN2; HMGCS1;
Nuclear envelope	3	71	0.75188	1.54602	0.308601	1	1	1	POLA1; NUP37; SYNE1;
Focal adhesion	2	45	0.501253	1.62876	0.350814	1	1	1	LIMS1; MYH2;
Cytoskeleton	17	427	4.26065	1.4529	0.0801415	1	1	1	AURKB; CKAP2; KIF23; LIMS1; TNIK; KRT13; SYNE1; KRT5; KRT79; KRT18; ALB; KRT8; KRT77; KRT10; JUP; KRT14; KRT1;
Cul3-RING ubiquitin ligase complex	1	9	0.250627	4.08852	0.221408	1	1	1	CUL3;
Intracellular	4	151	1.00251	0.968518	0.597482	1	1	1	INTS2; ARVCF; PAPSS2; CTSB;
Cell-cell junction	3	38	0.75188	2.88827	0.0853322	1	1	1	DLG1; DSG1; JUP;
Platelet alpha granule lumen	2	35	0.501253	2.09398	0.249118	1	1	1	TGFB3; ALB;
Mediator complex	1	23	0.250627	1.60094	0.472649	1	1	1	MED14;
Microtubule	5	129	1.25313	1.41639	0.279855	1	1	1	CDK1; CKAP2; KIF23; KIF4A; KIFC1;
Ruffle	1	24	0.250627	1.53426	0.48713	1	1	1	CDK6;
Peroxisomal membrane	1	13	0.250627	2.83148	0.303404	1	1	1	PEX14;
Integrator complex	1	13	0.250627	2.83148	0.303404	1	1	1	INTS2;
Condensed nuclear chromosome, centromeric region	1	3	0.250627	12.2384	0.080022	1	1	1	AURKB;
Nuclear matrix	1	37	0.250627	0.99534	0.642953	1	1	1	POLA1;
Centriolar satellite	1	8	0.250627	4.59894	0.199448	1	1	1	KRT18;
Nuclear outer membrane	1	7	0.250627	5.255	0.176869	1	1	1	DHCR7;
Protein complex	6	65	1.50376	3.37181	0.00865529	1	0.424109	1	FBXO7; HIGD1A; OXA1L; MYH2; ALB; TOP2A;
Apical part of cell	1	13	0.250627	2.83148	0.303404	1	1	1	CA2;
Spindle	2	30	0.501253	2.44286	0.198318	1	1	1	KIF23; NEDD9;
Transcription factor complex	1	43	0.250627	0.856487	0.697946	1	1	1	IVNS1ABP;
Nuclear membrane	6	78	1.50376	2.80992	0.0200537	1	0.632204	1	BCL2; LEMD2; NDC1; NUP37; SCD; CTSB;
Proteasome complex	1	34	0.250627	1.08314	0.611819	1	1	1	PSMD5;
AP-type membrane coat adaptor complex	1	5	0.250627	7.3528	0.129788	1	1	1	AP1S2;
Cell cortex	1	20	0.250627	1.84096	0.426711	1	1	1	MYO9B;
Histone deacetylase complex	1	21	0.250627	1.75333	0.442451	1	1	1	HDAC3;
Mitochondrial outer membrane	3	29	0.75188	3.78432	0.0441423	1	0.961322	1	BCL2; BCL2L1; TOMM34;
Mitochondrial ribosome	1	13	0.250627	2.83148	0.303404	1	1	1	MRPL28;
Synaptic vesicle	1	24	0.250627	1.53426	0.48713	1	1	1	PPT1;
Microsome	6	156	1.50376	1.40505	0.257164	1	1	1	ATM; LPGAT1; PYCR1; SOAT1; CTSH; ACSL4;
Microtubule cytoskeleton	2	47	0.501253	1.55946	0.370701	1	1	1	CKAP2; TUBGCP4;
Intracellular membrane-bounded organelle	6	127	1.50376	1.72586	0.136334	1	1	1	EIF4ENIF1; NUFIP2; POLA1; LGMN; CTSH; CTSS;
Cell junction	3	38	0.75188	2.88827	0.0853322	1	1	1	DLG1; PTPRJ; JUP;
Mitochondrial matrix	1	79	0.250627	0.466239	0.889438	1	1	1	HARS2;
Membrane raft	3	36	0.75188	3.04868	0.0751126	1	1	1	CD226; PPT1; THY1;
Mitochondrial alpha-ketoglutarate dehydrogenase complex	1	4	0.250627	9.18641	0.10525	1	1	1	BCKDHB;
Condensed chromosome	1	10	0.250627	3.68007	0.242768	1	1	1	SMC2;
Centriole	1	22	0.250627	1.67367	0.457759	1	1	1	TOP2A;
Axon	2	27	0.501253	2.71419	0.168504	1	1	1	NDEL1; PPT1;
Peroxisome	5	111	1.25313	1.64606	0.189122	1	1	1	ABCD3; ATM; PEX14; DHCR7; PMVK;
Golgi membrane	1	55	0.250627	0.669651	0.783871	1	1	1	MAN2A2;
BRCA1-A complex	1	7	0.250627	5.255	0.176869	1	1	1	BRE;
STAGA complex	1	12	0.250627	3.06724	0.28375	1	1	1	SAP130;
Coated pit	1	13	0.250627	2.83148	0.303404	1	1	1	DAB2;
Recycling endosome	1	10	0.250627	3.68007	0.242768	1	1	1	VAMP3;
External side of plasma membrane	1	35	0.250627	1.0522	0.622487	1	1	1	ADA;
Spliceosomal complex	2	46	0.501253	1.59336	0.360786	1	1	1	TXNL4A; IVNS1ABP;
Clathrin-coated vesicle	1	19	0.250627	1.9378	0.410529	1	1	1	VAMP3;
Cell-cell adherens junction	1	13	0.250627	2.83148	0.303404	1	1	1	JUP;
Basolateral plasma membrane	1	40	0.250627	0.920708	0.671596	1	1	1	DLG1;
Z disc	1	8	0.250627	4.59894	0.199448	1	1	1	DES;
Transcriptional repressor complex	1	17	0.250627	2.16564	0.376784	1	1	1	HDAC3;
Early endosome	1	69	0.250627	0.5338	0.853796	1	1	1	USP8;
Mitochondrial inner membrane	3	58	0.75188	1.89249	0.212382	1	1	1	HCCS; NDUFAF3; LGALS3;
SNARE complex	2	9	0.501253	8.13655	0.023761	1	0.632204	1	STX5; VTI1A;
Hemoglobin complex	1	10	0.250627	3.68007	0.242768	1	1	1	HBD;
SUN-KASH complex	1	5	0.250627	7.3528	0.129788	1	1	1	SYNE1;
Gamma-tubulin ring complex	1	6	0.250627	6.12937	0.153655	1	1	1	TUBGCP4;
Histone acetyltransferase complex	1	5	0.250627	7.3528	0.129788	1	1	1	KAT7;
Spindle microtubule	3	24	0.75188	4.57239	0.0270156	1	0.632204	1	CDK1; HDAC3; KIF4A;
Cytoplasmic vesicle	2	160	0.501253	0.458161	0.936513	1	1	1	CST7; AZU1;
SCF ubiquitin ligase complex	1	15	0.250627	2.4542	0.341112	1	1	1	FBXW11;
ESC/E(Z) complex	1	9	0.250627	4.08852	0.221408	1	1	1	EZH1;
Cytosolic large ribosomal subunit	1	36	0.250627	1.02298	0.632862	1	1	1	RPL38;
Sin3 complex	1	7	0.250627	5.255	0.176869	1	1	1	MORF4L1;
Stored secretory granule	1	19	0.250627	1.9378	0.410529	1	1	1	ELANE;
Cyclin-dependent protein kinase holoenzyme complex	2	7	0.501253	10.458	0.0143722	1	0.536561	1	CDK6; CDK2;
Muscle myosin complex	1	15	0.250627	2.4542	0.341112	1	1	1	MYH2;
Actin filament	1	24	0.250627	1.53426	0.48713	1	1	1	SSH1;
T cell receptor complex	1	12	0.250627	3.06724	0.28375	1	1	1	TRAT1;
Extrinsic to internal side of plasma membrane	1	4	0.250627	9.18641	0.10525	1	1	1	TGM3;
Chromosome	5	59	1.25313	3.09657	0.0225484	1	0.632204	1	AURKB; MCM3; MCM4; MCM2; MCM5;
Intracellular ferritin complex	1	2	0.250627	18.3271	0.0540842	1	1	1	FTL;
Microtubule associated complex	1	24	0.250627	1.53426	0.48713	1	1	1	KIFC1;
Condensed nuclear chromosome	1	12	0.250627	3.06724	0.28375	1	1	1	CHEK1;
Others	5	51	1.25313	3.58221	0.0126206	1	0.520765	1	DES; KIF23; CST7; CAMP; CTSS;
Cornified envelope	1	19	0.250627	1.9378	0.410529	1	1	1	ANXA1;
ATP-binding cassette (ABC) transporter complex	1	7	0.250627	5.255	0.176869	1	1	1	ABCB8;
Integral to membrane of membrane fraction	1	8	0.250627	4.59894	0.199448	1	1	1	TOMM40;
Mre11 complex	1	5	0.250627	7.3528	0.129788	1	1	1	NBN;
Synapse	5	33	1.25313	5.53556	0.00190387	1	0.123685	0.657721	DLGAP4; GRIPAP1; PRKCA; ARHGEF7; GPHN;
Anaphase-promoting complex	2	18	0.501253	4.07053	0.0859695	1	1	1	ANAPC4; UBE2C;
SWI/SNF complex	1	13	0.250627	2.83148	0.303404	1	1	1	RB1;
Nuclear chromosome	2	17	0.501253	4.30984	0.0777828	1	1	1	SMC2; TOP2A;
Alpha DNA polymerase:primase complex	2	3	0.501253	24.3556	0.00220867	1	0.123685	0.657721	POLA1; MCM3;
Integral to peroxisomal membrane	1	11	0.250627	3.34582	0.263544	1	1	1	ABCD3;
Costamere	1	6	0.250627	6.12937	0.153655	1	1	1	KRT19;
Sarcomere	2	15	0.501253	4.8841	0.0622264	1	1	1	MYH2; SYNE1;
Protein-DNA complex	1	5	0.250627	7.3528	0.129788	1	1	1	JUP;
Catenin complex	1	7	0.250627	5.255	0.176869	1	1	1	JUP;
Peroxisomal matrix	1	11	0.250627	3.34582	0.263544	1	1	1	FAR1;
DNA-directed RNA polymerase II, core complex	1	13	0.250627	2.83148	0.303404	1	1	1	POLR2J;
CRD-mediated mRNA stability complex	1	5	0.250627	7.3528	0.129788	1	1	1	YBX1;
Kinesin complex	1	9	0.250627	4.08852	0.221408	1	1	1	KIF23;
DNA replication factor C complex	2	6	0.501253	12.1981	0.0104543	1	0.475181	1	RFC5; PCNA;
Cajal body	1	21	0.250627	1.75333	0.442451	1	1	1	SMN1;
Chromosome, centromeric region	1	19	0.250627	1.9378	0.410529	1	1	1	DSCC1;
Mitochondrial outer membrane translocase complex	1	6	0.250627	6.12937	0.153655	1	1	1	TOMM40;
Filamentous actin	1	9	0.250627	4.08852	0.221408	1	1	1	MYO9B;
Nuclear body	1	12	0.250627	3.06724	0.28375	1	1	1	GEMIN6;
Chromosome passenger complex	1	3	0.250627	12.2384	0.080022	1	1	1	AURKB;
Condensin complex	1	5	0.250627	7.3528	0.129788	1	1	1	SMC2;
CUL4 RING ubiquitin ligase complex	1	11	0.250627	3.34582	0.263544	1	1	1	DCAF13;
MIS12/MIND type complex	1	4	0.250627	9.18641	0.10525	1	1	1	DSN1;
Chromosome, telomeric region	2	17	0.501253	4.30984	0.0777828	1	1	1	ATM; CHEK1;
Mitochondrial membrane	5	56	1.25313	3.26243	0.018378	1	0.632204	1	BCL2; BCL2L1; TIMM22; TOMM6; CPT1A;
Sarcoplasmic reticulum	1	32	0.250627	1.15081	0.589574	1	1	1	SYNE1;
Condensed chromosome kinetochore	1	7	0.250627	5.255	0.176869	1	1	1	SPC25;
BLOC-1 complex	1	3	0.250627	12.2384	0.080022	1	1	1	BLOC1S1;
Mitochondrial respiratory chain	1	8	0.250627	4.59894	0.199448	1	1	1	OXA1L;
MLL5-L complex	1	8	0.250627	4.59894	0.199448	1	1	1	STK38;
Nuclear inclusion body	1	3	0.250627	12.2384	0.080022	1	1	1	NBN;
Integral to mitochondrial membrane	2	3	0.501253	24.3556	0.00220867	1	0.123685	0.657721	OXA1L; TMEM70;
Ribonucleoside-diphosphate reductase complex	1	1	0.250627	36.4728	0.027417	1	0.632204	1	RRM1;
PCNA-p21 complex	1	2	0.250627	18.3271	0.0540842	1	1	1	PCNA;
Protein phosphatase type 1 complex	1	2	0.250627	18.3271	0.0540842	1	1	1	SHOC2;
Desmosome	2	11	0.501253	6.65852	0.0350152	1	0.784341	1	DSG1; JUP;
Nuclear chromosome, telomeric region	1	12	0.250627	3.06724	0.28375	1	1	1	NBN;
Postsynaptic membrane	1	7	0.250627	5.255	0.176869	1	1	1	SYNE1;
Catenin-TCF7L2 complex	1	1	0.250627	36.4728	0.027417	1	0.632204	1	JUP;
Nuclear ubiquitin ligase complex	1	2	0.250627	18.3271	0.0540842	1	1	1	BRE;
Zymogen granule	5	34	1.25313	5.37279	0.00218265	1	0.123685	0.657721	RAC1; MYO5C; ELANE; CTSB; SMPDL3A;
WASH complex	1	7	0.250627	5.255	0.176869	1	1	1	KIAA0196;
Stress granule	1	8	0.250627	4.59894	0.199448	1	1	1	YBX1;
Cell projection	1	41	0.250627	0.898257	0.680624	1	1	1	RAC1;
Nup107-160 complex	1	10	0.250627	3.68007	0.242768	1	1	1	NUP37;
Microtubule organizing center	1	10	0.250627	3.68007	0.242768	1	1	1	KRT18;
Origin recognition complex	1	6	0.250627	6.12937	0.153655	1	1	1	ORC4;
Extrinsic to plasma membrane	1	3	0.250627	12.2384	0.080022	1	1	1	USP8;
Myofibril	1	5	0.250627	7.3528	0.129788	1	1	1	MYH2;
Ndc80 complex	1	4	0.250627	9.18641	0.10525	1	1	1	SPC25;
Polar microtubule	1	4	0.250627	9.18641	0.10525	1	1	1	CUL3;
Proteasome regulatory particle, base subcomplex	1	1	0.250627	36.4728	0.027417	1	0.632204	1	PSMD5;
Nuclear chromatin	1	10	0.250627	3.68007	0.242768	1	1	1	TIMELESS;
Azurophil granule	1	6	0.250627	6.12937	0.153655	1	1	1	AZU1;
Nuclear replication fork	1	4	0.250627	9.18641	0.10525	1	1	1	PCNA;
Polysomal ribosome	1	4	0.250627	9.18641	0.10525	1	1	1	NUFIP2;
Chromatin assembly complex	1	6	0.250627	6.12937	0.153655	1	1	1	CHAF1B;
Mitochondrial envelope	1	5	0.250627	7.3528	0.129788	1	1	1	ABCB8;
Condensed chromosome, centromeric region	1	3	0.250627	12.2384	0.080022	1	1	1	AURKB;
DNA topoisomerase complex (ATP-hydrolyzing)	1	1	0.250627	36.4728	0.027417	1	0.632204	1	TOP2A;
Rb-E2F complex	1	1	0.250627	36.4728	0.027417	1	0.632204	1	RB1;
Viral integration complex	1	1	0.250627	36.4728	0.027417	1	0.632204	1	TOP2A;
Nuclear condensin complex	1	1	0.250627	36.4728	0.027417	1	0.632204	1	NCAPD3;
Gamma-catenin-TCF7L2 complex	1	1	0.250627	36.4728	0.027417	1	0.632204	1	JUP;

## Sheet: Molecular function
Analysis: Molecular function
Dataset name: LysateBanLecp005
Number of genes in the dataset: 444
Number of genes in the dataset (which are available in Molecular function database) :440
Number of genes in background: 18125
Is analysis quantitative: No
						Corrected p-values
Molecular function	No. of genes in the dataset	No. of genes in the background dataset	Percentage of genes	Fold enrichment	P-value (Hypergeometric test)	Bonferroni method	BH method	Q-value (Storey-Tibshirani method)	genes mapped (from input data set)
Cysteine-type peptidase activity	7	46	1.59091	6.27598	0.000111845	0.0250532	0.0250532	0.116354	CASP2; LGMN; CTSZ; CTSH; CTSC; CTSB; CTSS;
Structural molecule activity	15	269	3.40909	2.29841	0.00249632	0.559175	0.210523	0.977729	PFN2; KRT6A; KRT13; MYH2; MRPL28; TUBAL3; KRT75; KRT5; KRT82; KRT79; KRT36; KRT8; KRT77; KRT10; KRT1;
Catalytic activity	24	532	5.45455	1.85904	0.00281951	0.631569	0.210523	0.977729	BCKDHB; DHCR24; FAR1; MAN2A1; MMAB; OXA1L; PDK3; QTRT1; ACAD9; ARSA; DHCR7; IFI30; ALOX15; AK4; MSRA; FASN; CA2; MAN2A2; MTHFD2; CA1; GALNS; SMPDL3A; ACAD8; NAGA;
Structural constituent of ribosome	10	152	2.27273	2.71255	0.00403607	0.904079	0.22602	1	MRPL2; MRPL24; MRPL47; MRPL54; MRPS18B; MRPS21; MRPS26; RPS15A; RPL38; MRPS9;
Molecular function unknown	109	5685	24.7727	0.789861	0.999124	1	1	1	ANAPC4; ANKHD1; ARPP19; AUP1; BORA; BRI3BP; C1orf112; C21orf59; C9orf78; CAAP1; CDC42SE2; CDK2AP1; CDV3; CEND1; CENPK; CYP51A1; DAPL1; DCAF13; DCUN1D5; DLGAP4; DPCD; DPH5; ELP5; FAM162A; FAM98A; FBXW11; FTSJ3; HIGD1A; HN1; HPDL; INTS2; ISY1; KDM3B; KIAA0101; KIF1BP; LAG3; LEMD2; LIN7C; NAA40; NCAPD3; NDEL1; NDUFAF3; NMD3; NOC2L; NOP14; NSA2; NTMT1; PHF14; PRCC; PSMG3; RMI2; RNASEH2B; RPRD2; RSRC2…
Protease inhibitor activity	5	94	1.13636	2.19523	0.0786925	1	1	1	CST7; SERPINB2; ITIH2; SERPINB10; CSTB;
Acyltransferase activity	4	80	0.909091	2.0645	0.12986	1	1	1	KAT7; LPGAT1; SOAT1; BLOC1S1;
Cell adhesion molecule activity	5	356	1.13636	0.579684	0.935853	1	1	1	DLG1; DSG1; CD226; NEDD9; JUP;
Ligase activity	6	112	1.36364	2.21021	0.055405	1	1	1	TARS2; TYMS; ASNS; HARS2; ACSL4; PAPSS2;
Transaminase activity	2	23	0.454545	3.59828	0.106518	1	1	1	PSAT1; TGM3;
Transporter activity	23	576	5.22727	1.64552	0.0139067	1	0.519185	1	ABCB8; ABCC1; COG4; DDX18; IPO11; RANBP6; SEC24B; STX5; TIMM22; TOMM34; TOMM40; VAMP3; VAMP7; VPS52; VTI1A; XPO6; KLC4; NUP37; AP1S2; ALB; KPNA2; HBD; NPC2;
Translation regulator activity	5	101	1.13636	2.0431	0.0994369	1	1	1	CLUH; EIF4EBP1; EIF4ENIF1; PAIP2; REXO4;
ATPase activity	2	111	0.454545	0.745847	0.755083	1	1	1	DDX19B; CLPB;
Protein-tyrosine kinase activity	1	38	0.227273	1.09456	0.607348	1	1	1	FGR;
Transferase activity	2	156	0.454545	0.530713	0.895445	1	1	1	RFK; F13A1;
GTPase activator activity	3	144	0.681818	0.860973	0.682864	1	1	1	ASAP2; RGS3; RAP1GAP2;
Oxidoreductase activity	5	161	1.13636	1.28174	0.352942	1	1	1	COX6A1; PYCR1; RRM2; RRM1; SCD;
Ion channel activity	1	66	0.227273	0.630271	0.803074	1	1	1	PLP2;
Hydrolase activity	11	203	2.5	2.23401	0.010961	1	0.491055	1	MAN1A1; NUDT15; FUCA2; GGH; NAAA; DUT; FUCA1; HEXB; ASAH1; PPT1; HEXA;
Isomerase activity	2	45	0.454545	1.83951	0.298625	1	1	1	EBP; PPIF;
Serine-type peptidase activity	3	98	0.681818	1.26506	0.426276	1	1	1	PRTN3; ELANE; CTSA;
Receptor binding	2	129	0.454545	0.641783	0.824256	1	1	1	GPHN; THADA;
Structural constituent of cytoskeleton	8	137	1.81818	2.40822	0.0187398	1	0.524713	1	DES; MYL12B; TUBGCP4; KRT19; KRT3; KRT18; KRT4; KRT14;
Cytoskeletal protein binding	4	218	0.909091	0.757676	0.778822	1	1	1	CKAP2; DRP2; STMN2; PAK1IP1;
Deaminase activity	1	19	0.227273	2.18854	0.373225	1	1	1	ADA;
Metallopeptidase activity	1	101	0.227273	0.411882	0.917013	1	1	1	MMP14;
G-protein coupled receptor activity	2	736	0.454545	0.112494	1	1	1	1	CCR4; P2RY12;
Protein serine/threonine kinase activity	12	301	2.72727	1.64353	0.0644178	1	1	1	ATM; AURKB; CDK1; CDK12; CDK13; CHEK1; PRKCA; STK17A; TNIK; CSNK1G1; PBK; STK38;
Lyase activity	1	21	0.227273	1.98021	0.403318	1	1	1	HCCS;
Transcription regulator activity	17	832	3.86364	0.842154	0.800722	1	1	1	CCNK; CRTC2; FUBP1; HDAC3; KLF13; MED14; MIER1; MORF4L1; RB1; TBC1D2B; TIMELESS; ZMYND8; EZH1; RFX1; SAP130; LGALS3; HN1L;
Receptor activity	9	361	2.04545	1.02807	0.515098	1	1	1	CD69; CD82; LRP1; ICOS; LRP5; MRC1; SEMA4A; CD14; ITGAM;
Glucosidase activity	1	9	0.227273	4.61756	0.198466	1	1	1	GAA;
Transcription factor activity	9	842	2.04545	0.440781	0.998819	1	1	1	CEBPB; ETV6; GTF2H4; KLF13; RSRC2; ZFP36L1; NOLC1; YBX1; CREG1;
Defense/immunity protein activity	2	61	0.454545	1.3571	0.437988	1	1	1	AZU1; CAMP;
Receptor signaling complex scaffold activity	8	322	1.81818	1.02466	0.52365	1	1	1	BCL2; BCL2L1; LIMS1; SHOC2; TRAT1; TTC1; DAB2; SKAP2;
Calcium ion binding	3	185	0.681818	0.670173	0.830287	1	1	1	S100A2; FLG2; ANXA1;
Transmembrane receptor protein tyrosine kinase activity	1	56	0.227273	0.742799	0.748003	1	1	1	FCGR2B;
Ubiquitin-specific protease activity	10	377	2.27273	1.0937	0.433026	1	1	1	CBLL1; FBXO7; PSMD5; UBE2C; USP8; DTX3L; CUL3; HERC6; ZNRF2; PCNP;
Ribonuclease activity	4	48	0.909091	3.44055	0.0287899	1	0.71655	1	FCF1; NOB1; RNASET2; RNASE6;
Growth factor activity	1	110	0.227273	0.378186	0.933567	1	1	1	TGFB3;
ATP binding	1	6	0.227273	6.92249	0.137114	1	1	1	ABCD3;
Binding	1	22	0.227273	1.89024	0.41782	1	1	1	BRE;
DNA repair protein	3	57	0.681818	2.17486	0.160495	1	1	1	FANCD2; FANCI; RIF1;
Protein binding	8	182	1.81818	1.81281	0.0764885	1	1	1	CDK6; DSCC1; PEX14; SPC25; VAMP3; IFIT1; IVNS1ABP; RINT1;
RNA binding	13	366	2.95455	1.4642	0.111104	1	1	1	CELF1; DDX10; DDX31; DHX36; GRSF1; LARP4B; NUFIP2; PHAX; PUM1; SMN1; SRSF12; RCL1; RBM3;
GTPase activity	3	222	0.681818	0.558483	0.908628	1	1	1	GBP6; RAC1; SEPT3;
Methyltransferase activity	3	59	0.681818	2.10115	0.172382	1	1	1	EHMT2; PRMT3; HNMT;
DNA binding	20	654	4.54545	1.26031	0.172602	1	1	1	ARID2; CENPH; CHTF18; DUS3L; KIF4A; ORC4; RAD9A; WDHD1; ZCCHC6; BMI1; NBN; ZNF740; UHRF1; MCM3; RFC5; MCM4; MCM2; PCNA; MCM5; RORA;
Chaperone activity	4	126	0.909091	1.31086	0.366108	1	1	1	CHAF1B; F8A1; NPM3; ASF1B;
Auxiliary transport protein activity	4	333	0.909091	0.496024	0.962865	1	1	1	SLC35E1; SLC16A3; APOBR; SLC2A3;
Motor activity	4	79	0.909091	2.09063	0.12562	1	1	1	KIF23; KIFC1; MYO9B; MYO5C;
MHC class I receptor activity	1	37	0.227273	1.12413	0.597558	1	1	1	HLA-DRB1;
MHC class II receptor activity	1	38	0.227273	1.09456	0.607348	1	1	1	HLA-DRB1;
Kinase binding	1	16	0.227273	2.59864	0.325222	1	1	1	CCNA2;
DNA-directed RNA polymerase activity	1	29	0.227273	1.43413	0.509948	1	1	1	POLR2J;
Peptidase activity	2	58	0.454545	1.42728	0.412864	1	1	1	DPEP2; CELA3A;
Protein tyrosine/serine/threonine phosphatase activity	2	37	0.454545	2.23714	0.226333	1	1	1	DUSP12; SSH1;
Kinase activity	1	14	0.227273	2.96961	0.291199	1	1	1	CDK2;
Nucleotidyltransferase activity	1	11	0.227273	3.77876	0.236929	1	1	1	GALT;
Guanyl-nucleotide exchange factor activity	4	112	0.909091	1.4747	0.289086	1	1	1	GRIPAP1; ARHGEF7; VAV2; ARHGEF15;
Lipid kinase activity	1	35	0.227273	1.18835	0.577242	1	1	1	PMVK;
Phospholipase activity	1	45	0.227273	0.924332	0.669535	1	1	1	PLCB3;
Protein threonine/tyrosine kinase activity	1	28	0.227273	1.48533	0.497736	1	1	1	CLK3;
Cytokine activity	1	107	0.227273	0.388788	0.928452	1	1	1	IL1B;
Carboxypeptidase activity	1	21	0.227273	1.98021	0.403318	1	1	1	AGBL3;
Enzyme regulator activity	1	13	0.227273	3.19786	0.273551	1	1	1	PRPSAP1;
Palmitoyltransferase activity	1	7	0.227273	5.93498	0.158068	1	1	1	CPT1A;
Transmembrane receptor activity	1	52	0.227273	0.799927	0.721891	1	1	1	IL2RA;
Deoxyribonuclease activity	1	17	0.227273	2.44587	0.341617	1	1	1	DNASE1;
Helicase activity	1	25	0.227273	1.6635	0.459249	1	1	1	DHX29;
DNA-directed DNA polymerase activity	2	20	0.454545	4.13775	0.0838265	1	1	1	POLA1; POLA2;
Ribonucleoprotein	4	41	0.909091	4.02782	0.0170881	1	0.524713	1	IMP3; GEMIN6; MRPL28; MKRN3;
CoA-ligase activity	1	2	0.227273	20.6986	0.0479637	1	0.976716	1	HMGCS1;
Storage protein	1	3	0.227273	13.822	0.0710778	1	1	1	FTL;
Racemase and epimerase activity	1	11	0.227273	3.77876	0.236929	1	1	1	GALM;
Nucleic acid binding	1	9	0.227273	4.61756	0.198466	1	1	1	IFIT1;
Receptor regulator activity	1	6	0.227273	6.92249	0.137114	1	1	1	CD82;
Sulfotransferase activity	1	53	0.227273	0.784837	0.728662	1	1	1	CHST11;
RNA methyltransferase activity	1	12	0.227273	3.46413	0.255465	1	1	1	TRMT10C;
Protein serine/threonine phosphatase activity	1	44	0.227273	0.945335	0.661292	1	1	1	PDPR;
Receptor signaling protein tyrosine phosphatase activity	1	16	0.227273	2.59864	0.325222	1	1	1	PTPRJ;
Sialyltransferase activity	1	19	0.227273	2.18854	0.373225	1	1	1	ST6GALNAC2;
DNA topoisomerase activity	1	6	0.227273	6.92249	0.137114	1	1	1	TOP2A;
Spliceosomal catalysis	1	3	0.227273	13.822	0.0710778	1	1	1	TXNL4A;
Protein domain specific binding	1	6	0.227273	6.92249	0.137114	1	1	1	SYNJ2BP;
Structural constituent of nuclear pore	1	2	0.227273	20.6986	0.0479637	1	0.976716	1	NDC1;

## Sheet: Biological process
Analysis: Biological process
Dataset name: LysateBanLecp005
Number of genes in the dataset: 444
Number of genes in the dataset (which are available in Biological process database) :440
Number of genes in background: 18124
Is analysis quantitative: No
						Corrected p-values
Biological process	No. of genes in the dataset	No. of genes in the background dataset	Percentage of genes	Fold enrichment	P-value (Hypergeometric test)	Bonferroni method	BH method	Q-value (Storey-Tibshirani method)	genes mapped (from input data set)
Protein metabolism	54	1323	12.2727	1.68152	0.000117829	0.0209736	0.0180489	0.10896	CBLL1; CLUH; EIF4EBP1; EIF4ENIF1; F8A1; FBXO7; FBXW11; GRSF1; MMP14; MRPL2; MRPL24; MRPL47; MRPL54; MRPS18B; MRPS21; MRPS26; PSMD5; TARS2; TMUB1; UBE2C; USP8; CST7; DTX3L; LGMN; PRTN3; SERPINB2; AGBL3; CUL3; DPEP2; HERC6; ITIH2; MRPL28; RPS15A; ZNRF2; ST6GALNAC2; CTSZ; CTSH; ASNS; HARS2; RPL38; NPM3; ASF1B; ELANE; SELENBP1; CTSA; CTSC; PPIF; CTSB; CTSS; SERPINB10; CELA3A; CSTB; PCNP; MRPS9;
Metabolism	64	1683	14.5455	1.56658	0.000202796	0.0360977	0.0180489	0.10896	BCKDHB; COX6A1; CYP51A1; DDX19B; DHCR24; EBP; FAR1; GALT; HCCS; LPGAT1; MAN1A1; MAN2A1; MMAB; NAA40; NUDT15; OXA1L; PDK3; PLCB3; PRMT3; PSAT1; PYCR1; QTRT1; RFK; SOAT1; ACAD9; ADA; ARSA; FUCA2; GAA; GGH; NPL; CHST11; CLPB; DHCR7; PMVK; NAAA; TYMS; IFI30; ACSL4; F13A1; FUCA1; ALOX15; AK4; PAPSS2; MSRA; HEXB; NPC2; SCD; FASN; CA2; MAN2A2; HMGCS1; ASAH1; MTHFD2; CA1; PPT1; PRPSAP1; GALM; HEXA; GALNS…
Energy pathways	60	1633	13.6364	1.51365	0.00078008	0.138854	0.0462848	0.279419	COX6A1; CYP51A1; DHCR24; EBP; FAR1; GALT; HCCS; LPGAT1; MAN1A1; MAN2A1; MMAB; NUDT15; OXA1L; PDK3; PLCB3; PRMT3; PSAT1; PYCR1; QTRT1; RFK; SOAT1; ACAD9; ADA; ARSA; FUCA2; GAA; GGH; NPL; CHST11; CLPB; DHCR7; PMVK; NAAA; TYMS; IFI30; ACSL4; F13A1; FUCA1; ALOX15; AK4; MSRA; HEXB; NPC2; SCD; FASN; CA2; MAN2A2; HMGCS1; ASAH1; MTHFD2; CA1; PPT1; PRPSAP1; GALM; HEXA; GALNS; SMPDL3A; ACAD8; TGM3; NAGA;
DNA replication	3	13	0.681818	9.52974	0.00339023	0.603461	0.150865	0.910768	ORC4; DUT; RFC5;
Mitochondrial transport	2	5	0.454545	16.5253	0.00560159	0.997084	0.199417	1	SYNJ2BP; CPT1A;
Biological_process unknown	80	4731	18.1818	0.696598	0.999972	1	1	1	BRI3BP; C1orf112; C21orf59; C9orf78; CAAP1; CENPK; DAPL1; DCUN1D5; DPCD; DPH5; ELP5; FAM162A; FAM98A; FANCI; FCF1; FTSJ3; HIGD1A; HPDL; INTS2; ISY1; KDM3B; KIAA0101; KIF1BP; LEMD2; NCAPD3; NDUFAF3; NMD3; NOC2L; NOP14; NTMT1; PHF14; PSMG3; RMI2; RNASEH2B; RPRD2; RSRC2; SDAD1; SMC2; SPATA5L1; SPIN3; SRBD1; SYNJ2BP; SZRD1; TEX264; THUMPD3; TMCO6; TMEM41B; TMEM70; TTC4; TXNL4A; UNC119B; WDR73; BCL2L1…
Cell growth and/or maintenance	33	1125	7.5	1.2086	0.149884	1	1	1	CEND1; CKAP2; DES; KIF23; MYL12B; MYO9B; NDEL1; PFN2; TUBGCP4; KRT6A; DSG1; KRT13; KRT19; MYH2; SYNE1; TUBAL3; MYO5C; KRT75; DRP2; KRT5; KRT82; KRT79; ARVCF; KRT3; KRT18; KRT36; KRT8; KRT77; KRT4; KRT10; KRT14; KRT1; SSH1;
Transport	27	1215	6.13636	0.915665	0.712398	1	1	1	ABCB8; ABCC1; ABCD3; COG4; DDX18; RANBP6; SEC24B; SLC35E1; STX5; TIMM22; TOMM34; TOMM40; VAMP3; VAMP7; VPS52; VTI1A; XPO6; KLC4; NUP37; PLP2; AP1S2; ALB; SLC16A3; TJP3; HBD; SLC2A3; FTL;
Cell communication	73	3713	16.5909	0.809931	0.984329	1	1	1	ANAPC4; ARPP19; ASAP2; ATM; AUP1; AURKB; CCR4; CD82; CDC42SE2; CDK1; CDK12; CDK13; CDK6; CHEK1; CLK3; DLG1; DLGAP4; DUSP12; FANCD2; GBP6; GRIPAP1; HN1; IPO11; LIMS1; LIN7C; PEX14; PRCC; PRKCA; RAC1; RGS3; SHOC2; STK17A; TNIK; TRAT1; TTC1; TXNIP; WDR76; ARHGEF7; FGR; LRP1; RAP1GAP2; VAV2; CCNA2; CSNK1G1; GPHN; NEDD9; PTPRJ; RINT1; TGFB3; WDR46; ARHGEF15; LRP5; P2RY12; PDPR; S100A2; DAB2; FLG2; JUP…
Signal transduction	72	3934	16.3636	0.753961	0.998098	1	1	1	ANAPC4; ARPP19; ASAP2; ATM; AUP1; AURKB; CCR4; CD82; CDC42SE2; CDK1; CDK12; CDK13; CDK6; CHEK1; CLK3; DLG1; DLGAP4; DUSP12; FANCD2; GBP6; GRIPAP1; HN1; IPO11; LIMS1; LIN7C; PEX14; PRCC; PRKCA; RAC1; RGS3; SHOC2; STK17A; TNIK; TRAT1; TTC1; TXNIP; ARHGEF7; FGR; LRP1; RAP1GAP2; VAV2; CCNA2; CSNK1G1; GPHN; NEDD9; PTPRJ; RINT1; TGFB3; WDR46; ARHGEF15; LRP5; P2RY12; PDPR; S100A2; DAB2; FLG2; JUP; KPNA2…
Regulation of nucleobase, nucleoside, nucleotide and nucleic acid metabolism	77	2828	17.5	1.12165	0.148629	1	1	1	ARID2; CCNK; CDK2AP1; CEBPB; CELF1; CENPH; CHAF1B; CHTF18; CRTC2; DCAF13; DDX10; DDX31; DHX29; DHX36; DSCC1; DUS3L; EHMT2; ETV6; FUBP1; GTF2H4; HDAC3; IMP3; KAT7; KIF4A; KLF13; LARP4B; MED14; MIER1; MORF4L1; NOB1; NSA2; NUFIP2; PAIP2; PHAX; POLA1; RAD9A; RB1; REXO4; RIF1; RRM2; SMN1; SRSF12; TBC1D2B; TIMELESS; WDHD1; ZCCHC6; ZFP36L1; ZMYND8; BLOC1S1; POLR2J; BMI1; EZH1; GEMIN6; IVNS1ABP; RCL1; RF…
RNA metabolism	1	26	0.227273	1.59946	0.472413	1	1	1	MRPL28;
Regulation of cell cycle	1	57	0.227273	0.72973	0.754159	1	1	1	CCNK;
Amino acid and derivative metabolism	1	4	0.227273	10.3745	0.0936369	1	1	1	HNMT;
Immune response	11	576	2.5	0.787316	0.830739	1	1	1	CD69; HLA-DRB1; LAG3; CD226; ICOS; IL2RA; AZU1; CAMP; IL1B; THY1; CD14;
Anti-apoptosis	2	32	0.454545	2.58644	0.181831	1	1	1	ANKHD1; SERPINB2;
Synapse organization and biogenesis	1	5	0.227273	8.30377	0.115646	1	1	1	GPHN;
Cell cycle	2	22	0.454545	3.76156	0.0987904	1	1	1	BORA; ZWINT;
Apoptosis	7	220	1.59091	1.3124	0.287259	1	1	1	BCL2; BCL2L1; CASP2; CCNK; RGS3; SPC25; BCL2L15;
Regulation of gene expression, epigenetic	3	66	0.681818	1.87823	0.215746	1	1	1	CCNK; CELF1; MORF4L1;
Bone remodeling	1	3	0.227273	13.8212	0.0710816	1	1	1	RORA;
Cell proliferation	3	39	0.681818	3.17821	0.0683121	1	1	1	CDV3; RSRC2; BRE;
DNA repair	2	58	0.454545	1.4272	0.412891	1	1	1	NBN; PCNA;
Protein modification	1	20	0.227273	2.07906	0.388473	1	1	1	EHMT2;
Regulation of signal transduction	3	24	0.681818	5.16376	0.0197012	1	0.584468	1	ARHGEF7; FCGR2B; BRE;
Regulation of translation	1	13	0.227273	3.19769	0.273564	1	1	1	PUM1;
Microtubule-based process	1	5	0.227273	8.30377	0.115646	1	1	1	KIFC1;
Protein transport	1	11	0.227273	3.77856	0.236941	1	1	1	NDC1;

## Sheet: Biological pathway
Analysis: Biological pathway
Dataset name: LysateBanLecp005
Number of genes in the dataset: 444
Number of genes in the dataset (which are available in Biological pathway database) :196
Number of genes in background: 6290
Is analysis quantitative: No
						Corrected p-values
Biological pathway	No. of genes in the dataset	No. of genes in the background dataset	Percentage of genes	Fold enrichment	P-value (Hypergeometric test)	Bonferroni method	BH method	Q-value (Storey-Tibshirani method)	genes mapped (from input data set)
Cell Cycle, Mitotic	30	317	15.3061	3.03785	3.28271e-08	5.47557e-05	4.0754e-05	0.000165137	ANAPC4; AURKB; CDK1; CDK6; CENPH; CENPK; KIF23; NDEL1; ORC4; POLA1; PSMD5; RB1; RRM2; SPC25; TUBGCP4; UBE2C; ZWINT; NUP37; CCNA2; DSN1; TYMS; MCM3; RFC5; MCM4; MCM2; TOP2A; CDK2; PCNA; MCM5; POLA2;
G2/M Checkpoints	11	43	5.61224	8.21469	4.88658e-08	8.15081e-05	4.0754e-05	0.000165137	ATM; CDK1; CHEK1; ORC4; RAD9A; MCM3; RFC5; MCM4; MCM2; CDK2; MCM5;
G2/M DNA damage checkpoint	9	29	4.59184	9.96667	1.34601e-07	0.000224514	7.48381e-05	0.000303246	ATM; CDK1; CHEK1; ORC4; MCM3; MCM4; MCM2; CDK2; MCM5;
Mitotic G1-G1/S phases	18	140	9.18367	4.12789	2.65669e-07	0.000443136	0.000110784	0.0004489	ANAPC4; CDK1; CDK6; ORC4; POLA1; PSMD5; RB1; RRM2; UBE2C; TYMS; MCM3; MCM4; MCM2; TOP2A; CDK2; PCNA; MCM5; POLA2;
G1/S Transition	16	117	8.16327	4.39078	5.41157e-07	0.00090265	0.00018053	0.000731512	ANAPC4; CDK1; ORC4; POLA1; PSMD5; RB1; RRM2; UBE2C; TYMS; MCM3; MCM4; MCM2; CDK2; PCNA; MCM5; POLA2;
ATM pathway	27	307	13.7755	2.82322	7.6354e-07	0.00127358	0.000212264	0.0008601	ATM; BCL2; BCL2L1; CCNK; CD82; CDK1; CHEK1; FANCD2; FANCI; FBXW11; POLA1; RAD9A; RB1; RRM2; TIMELESS; CCNA2; CSNK1G1; DGCR8; NBN; S100A2; RRM1; TYMS; MCM3; RFC5; MCM2; CDK2; PCNA;
Activation of ATR in response to replication stress	9	37	4.59184	7.8123	1.34648e-06	0.00224593	0.000279739	0.00113351	CHEK1; ORC4; RAD9A; MCM3; RFC5; MCM4; MCM2; CDK2; MCM5;
E2F mediated regulation of DNA replication	8	28	4.08163	9.17683	1.40187e-06	0.00233833	0.000279739	0.00113351	CDK1; ORC4; POLA1; RB1; RRM2; TYMS; PCNA; POLA2;
DNA Replication	24	261	12.2449	2.95194	1.50938e-06	0.00251765	0.000279739	0.00113351	ANAPC4; AURKB; CDK1; CENPH; CENPK; KIF23; NDEL1; ORC4; POLA1; PSMD5; RB1; SPC25; UBE2C; ZWINT; NUP37; DSN1; MCM3; RFC5; MCM4; MCM2; CDK2; PCNA; MCM5; POLA2;
Activation of the pre-replicative complex	8	30	4.08163	8.56524	2.50192e-06	0.0041732	0.00041732	0.00169099	ORC4; POLA1; MCM3; MCM4; MCM2; CDK2; MCM5; POLA2;
DNA strand elongation	8	31	4.08163	8.28903	3.28287e-06	0.00547583	0.000497803	0.00201711	POLA1; MCM3; RFC5; MCM4; MCM2; PCNA; MCM5; POLA2;
S Phase	15	121	7.65306	3.98045	4.37839e-06	0.00730316	0.000608597	0.00246605	ANAPC4; CDK1; ORC4; POLA1; PSMD5; RB1; UBE2C; MCM3; RFC5; MCM4; MCM2; CDK2; PCNA; MCM5; POLA2;
Synthesis of DNA	14	109	7.14286	4.12425	6.06383e-06	0.0101145	0.000778036	0.00315262	ANAPC4; ORC4; POLA1; PSMD5; RB1; UBE2C; MCM3; RFC5; MCM4; MCM2; CDK2; PCNA; MCM5; POLA2;
Cell Cycle Checkpoints	14	118	7.14286	3.80971	1.54151e-05	0.0257124	0.0018366	0.00744196	ANAPC4; ATM; CDK1; CHEK1; ORC4; PSMD5; RAD9A; UBE2C; MCM3; RFC5; MCM4; MCM2; CDK2; MCM5;
Mitotic M-M/G1 phases	21	242	10.7143	2.7859	1.75897e-05	0.0293396	0.00195597	0.00792565	ANAPC4; AURKB; CDK1; CENPH; CENPK; KIF23; NDEL1; ORC4; POLA1; PSMD5; SPC25; UBE2C; ZWINT; NUP37; DSN1; MCM3; MCM4; MCM2; CDK2; MCM5; POLA2;
Cholesterol biosynthesis	6	20	3.06122	9.6383	2.28191e-05	0.0380623	0.00237889	0.00963935	CYP51A1; DHCR24; EBP; DHCR7; PMVK; HMGCS1;
ATR signaling pathway	21	250	10.7143	2.69676	2.8788e-05	0.0480184	0.00282461	0.0114454	ATM; BCL2; BCL2L1; CCNK; CD82; CHEK1; FANCD2; FANCI; FBXW11; RAD9A; RB1; TIMELESS; CCNA2; CSNK1G1; DGCR8; NBN; S100A2; RFC5; MCM2; CDK2; PCNA;
G1/S-Specific Transcription	5	15	2.55102	10.711	6.49915e-05	0.108406	0.00602255	0.0244035	CDK1; POLA1; RRM2; TYMS; PCNA;
E2F transcription factor network	10	73	5.10204	4.39972	7.70649e-05	0.128544	0.00676548	0.0274139	ATM; CDK1; POLA1; RB1; RRM2; CCNA2; RRM1; TYMS; MCM3; CDK2;
superpathway of cholesterol biosynthesis	6	25	3.06122	7.71141	9.15213e-05	0.152657	0.00755304	0.0306051	CYP51A1; DHCR24; EBP; DHCR7; PMVK; HMGCS1;
Cyclin A:Cdk2-associated events at S phase entry	11	90	5.61224	3.92527	9.81189e-05	0.163662	0.00755304	0.0306051	ANAPC4; CDK1; ORC4; PSMD5; RB1; UBE2C; MCM3; MCM4; MCM2; CDK2; MCM5;
Fanconi anemia pathway	8	48	4.08163	5.35395	9.96205e-05	0.166167	0.00755304	0.0306051	ATM; CHEK1; FANCD2; FANCI; FBXW11; RAD9A; NBN; RFC5;
DNA Replication Pre-Initiation	11	98	5.61224	3.60487	0.000212599	0.354614	0.0147655	0.0598301	ANAPC4; ORC4; POLA1; PSMD5; UBE2C; MCM3; MCM4; MCM2; CDK2; MCM5; POLA2;
M/G1 Transition	11	98	5.61224	3.60487	0.000212599	0.354614	0.0147655	0.0598301	ANAPC4; ORC4; POLA1; PSMD5; UBE2C; MCM3; MCM4; MCM2; CDK2; MCM5; POLA2;
Switching of origins to a post-replicative state	10	83	5.10204	3.8697	0.000230157	0.383902	0.0147655	0.0598301	ANAPC4; ORC4; PSMD5; RB1; UBE2C; MCM3; MCM4; MCM2; CDK2; MCM5;
Orc1 removal from chromatin	10	83	5.10204	3.8697	0.000230157	0.383902	0.0147655	0.0598301	ANAPC4; ORC4; PSMD5; RB1; UBE2C; MCM3; MCM4; MCM2; CDK2; MCM5;
Unwinding of DNA	4	11	2.04082	11.6877	0.000254085	0.423814	0.0156968	0.0636039	MCM3; MCM4; MCM2; MCM5;
Removal of licensing factors from origins	10	85	5.10204	3.77865	0.000280509	0.46789	0.0167103	0.0677108	ANAPC4; ORC4; PSMD5; RB1; UBE2C; MCM3; MCM4; MCM2; CDK2; MCM5;
Regulation of DNA replication	10	88	5.10204	3.64985	0.000373114	0.622354	0.0214605	0.0869584	ANAPC4; ORC4; PSMD5; RB1; UBE2C; MCM3; MCM4; MCM2; CDK2; MCM5;
trans-Golgi Network Vesicle Budding	6	33	3.06122	5.84254	0.000464923	0.775492	0.0250159	0.101365	PUM1; VAMP7; BLOC1S1; AP1S2; BLOC1S4; FTL;
Clathrin derived vesicle budding	6	33	3.06122	5.84254	0.000464923	0.775492	0.0250159	0.101365	PUM1; VAMP7; BLOC1S1; AP1S2; BLOC1S4; FTL;
cholesterol biosynthesis II (via 24,25-dihydrolanosterol)	4	13	2.04082	9.891	0.000524125	0.874241	0.025713	0.10419	CYP51A1; DHCR24; EBP; DHCR7;
cholesterol biosynthesis I	4	13	2.04082	9.891	0.000524125	0.874241	0.025713	0.10419	CYP51A1; DHCR24; EBP; DHCR7;
cholesterol biosynthesis III (via desmosterol)	4	13	2.04082	9.891	0.000524125	0.874241	0.025713	0.10419	CYP51A1; DHCR24; EBP; DHCR7;
ATM mediated response to DNA double-strand break	3	6	1.53061	16.0718	0.000555999	0.927407	0.0257613	0.104385	ATM; CHEK1; NBN;
ATM mediated phosphorylation of repair proteins	3	6	1.53061	16.0718	0.000555999	0.927407	0.0257613	0.104385	ATM; CHEK1; NBN;
The role of Nef in HIV-1 replication and disease pathogenesis	2	27	1.02041	2.38806	0.205032	1	1	1	RAC1; AP1S2;
Vif-mediated degradation of APOBEC3G	3	69	1.53061	1.39968	0.364673	1	1	1	ANAPC4; PSMD5; UBE2C;
Nuclear import of Rev protein	1	30	0.510204	1.08001	0.614002	1	1	1	NUP37;
Interactions of Rev with host cellular proteins	1	33	0.510204	0.981859	0.649141	1	1	1	NUP37;
Nef mediated downregulation of MHC class I complex cell surface expression	1	9	0.510204	3.59724	0.248055	1	1	1	AP1S2;
Nef-mediates down modulation of cell surface receptors by recruiting them to clathrin adapters	1	20	0.510204	1.61975	0.469588	1	1	1	AP1S2;
Nef and signal transduction	1	8	0.510204	4.04634	0.223838	1	1	1	RAC1;
Developmental Biology	12	432	6.12245	0.892118	0.703849	1	1	1	CDK1; CEBPB; DLG1; HDAC3; KIF4A; MED14; MYL12B; RAC1; VAV2; RPS15A; RPL38; SEMA4A;
Vpu mediated degradation of CD4	3	67	1.53061	1.44145	0.3475	1	1	1	ANAPC4; PSMD5; UBE2C;
MicroRNA (miRNA) Biogenesis	2	22	1.02041	2.93055	0.148806	1	0.947944	1	POLR2J; DGCR8;
Regulatory RNA pathways	2	22	1.02041	2.93055	0.148806	1	0.947944	1	POLR2J; DGCR8;
Sema4D in semaphorin signaling	2	27	1.02041	2.38806	0.205032	1	1	1	MYL12B; RAC1;
Sema4D mediated inhibition of cell attachment and migration	1	8	0.510204	4.04634	0.223838	1	1	1	RAC1;
Sema4D induced cell migration and growth-cone collapse	2	22	1.02041	2.93055	0.148806	1	0.947944	1	MYL12B; RAC1;
SEMA3A-Plexin repulsion signaling by inhibiting Integrin adhesion	1	14	0.510204	2.31343	0.358314	1	1	1	RAC1;
Axon guidance	7	219	3.57143	1.02713	0.527947	1	1	1	CDK1; DLG1; KIF4A; MYL12B; RAC1; VAV2; SEMA4A;
Semaphorin interactions	3	64	1.53061	1.50901	0.321673	1	1	1	MYL12B; RAC1; SEMA4A;
NCAM signaling for neurite out-growth	1	57	0.510204	0.568517	0.836775	1	1	1	CDK1;
Other semaphorin interactions	1	16	0.510204	2.02443	0.397771	1	1	1	SEMA4A;
Sema3A PAK dependent Axon repulsion	1	15	0.510204	2.1593	0.378353	1	1	1	RAC1;
Signal transduction by L1	2	35	1.02041	1.84237	0.298097	1	1	1	RAC1; VAV2;
NrCAM interactions	1	7	0.510204	4.62356	0.198846	1	1	1	DLG1;
Regulation of beta-cell development	2	108	1.02041	0.59718	0.855837	1	1	1	RPS15A; RPL38;
Signaling by Robo receptor	1	23	0.510204	1.40857	0.517799	1	1	1	RAC1;
Inactivation of Cdc42 and Rac	1	8	0.510204	4.04634	0.223838	1	1	1	RAC1;
Activation of Rac	1	8	0.510204	4.04634	0.223838	1	1	1	RAC1;
Recycling pathway of L1	1	32	0.510204	1.01253	0.637797	1	1	1	KIF4A;
L1CAM interactions	4	79	2.04082	1.62868	0.231647	1	1	1	DLG1; KIF4A; RAC1; VAV2;
Signal amplification	1	16	0.510204	2.02443	0.397771	1	1	1	P2RY12;
Platelet sensitization by LDL	1	8	0.510204	4.04634	0.223838	1	1	1	FGR;
Platelet activation, signaling and aggregation	4	138	2.04082	0.93241	0.629149	1	1	1	PRKCA; RAC1; VAV2; P2RY12;
Transcriptional Regulation of White Adipocyte Differentiation	3	69	1.53061	1.39968	0.364673	1	1	1	CEBPB; HDAC3; MED14;
Elongation arrest and recovery	1	31	0.510204	1.04518	0.626088	1	1	1	POLR2J;
Regulation of gene expression in beta cells	2	98	1.02041	0.65811	0.815684	1	1	1	RPS15A; RPL38;
Hemostasis	14	375	7.14286	1.19886	0.279183	1	1	1	KIF23; KIF4A; KIFC1; PRKCA; RAC1; FGR; SERPINB2; VAV2; P2RY12; SLC16A3; F13A1; CDK2; HBD; ITGAM;
APC-Cdc20 mediated degradation of Nek2A	2	23	1.02041	2.80319	0.159801	1	0.990884	1	ANAPC4; UBE2C;
Platelet homeostasis	1	40	0.510204	0.810076	0.719242	1	1	1	FGR;
Cell surface interactions at the vascular wall	2	72	1.02041	0.895728	0.662286	1	1	1	SLC16A3; ITGAM;
Dissolution of Fibrin Clot	1	10	0.510204	3.23788	0.271519	1	1	1	SERPINB2;
Response to elevated platelet cytosolic Ca2+	1	39	0.510204	0.830842	0.710154	1	1	1	PRKCA;
Common Pathway	1	16	0.510204	2.02443	0.397771	1	1	1	F13A1;
Formation of Fibrin Clot (Clotting Cascade)	1	33	0.510204	0.981859	0.649141	1	1	1	F13A1;
ADP signalling through P2Y purinoceptor 12	1	6	0.510204	5.39287	0.173053	1	0.998799	1	P2RY12;
GPVI-mediated activation cascade	2	27	1.02041	2.38806	0.205032	1	1	1	RAC1; VAV2;
Mitotic Telophase /Cytokinesis	3	18	1.53061	5.36322	0.0172144	1	0.224326	0.908974	ANAPC4; KIF23; UBE2C;
Mitotic Metaphase/Anaphase Transition	2	22	1.02041	2.93055	0.148806	1	0.947944	1	ANAPC4; UBE2C;
Mitotic Prometaphase	10	99	5.10204	3.24435	0.000957054	1	0.0380087	0.154012	ANAPC4; AURKB; CENPH; CENPK; NDEL1; SPC25; UBE2C; ZWINT; NUP37; DSN1;
Mitotic Prophase	1	62	0.510204	0.522676	0.860882	1	1	1	CDK1;
Golgi Cisternae Pericentriolar Stack Reorganization	1	62	0.510204	0.522676	0.860882	1	1	1	CDK1;
M Phase	12	158	6.12245	2.43911	0.0036671	1	0.113273	0.458983	ANAPC4; AURKB; CDK1; CENPH; CENPK; KIF23; NDEL1; SPC25; UBE2C; ZWINT; NUP37; DSN1;
Basigin interactions	1	9	0.510204	3.59724	0.248055	1	1	1	SLC16A3;
Factors involved in megakaryocyte development and platelet production	6	119	3.06122	1.62056	0.166284	1	0.998799	1	KIF23; KIF4A; KIFC1; RAC1; CDK2; HBD;
Kinesins	3	21	1.53061	4.59741	0.026209	1	0.319099	1	KIF23; KIF4A; KIFC1;
Netrin-1 signaling	1	45	0.510204	0.720088	0.760601	1	1	1	RAC1;
DCC mediated attractive signaling	1	10	0.510204	3.23788	0.271519	1	1	1	RAC1;
ERK activation	1	6	0.510204	5.39287	0.173053	1	0.998799	1	CDK1;
ERK1 activation	1	3	0.510204	10.7678	0.090613	1	0.696509	1	CDK1;
RAF/MAP kinase cascade	1	11	0.510204	2.94379	0.294255	1	1	1	CDK1;
Neurotransmitter Receptor Binding And Downstream Transmission In The Postsynaptic Cell	2	89	1.02041	0.724653	0.771341	1	1	1	DLG1; PLCB3;
Glutamate Binding, Activation of AMPA Receptors and Synaptic Plasticity	1	21	0.510204	1.54265	0.486169	1	1	1	DLG1;
Trafficking of AMPA receptors	1	21	0.510204	1.54265	0.486169	1	1	1	DLG1;
Neuronal System	2	188	1.02041	0.343074	0.982816	1	1	1	DLG1; PLCB3;
Smooth Muscle Contraction	1	24	0.510204	1.3499	0.53288	1	1	1	MYL12B;
Striated Muscle Contraction	1	30	0.510204	1.08001	0.614002	1	1	1	DES;
Muscle contraction	2	50	1.02041	1.28977	0.465003	1	1	1	DES; MYL12B;
Inactivation of APC/C via direct inhibition of the APC/C complex	2	18	1.02041	3.58142	0.106694	1	0.78399	1	ANAPC4; UBE2C;
Inhibition of the proteolytic activity of APC/C required for the onset of anaphase by mitotic spindle checkpoint components	2	18	1.02041	3.58142	0.106694	1	0.78399	1	ANAPC4; UBE2C;
Transmission across Chemical Synapses	2	121	1.02041	0.533025	0.896133	1	1	1	DLG1; PLCB3;
Presynaptic function of Kainate receptors	1	6	0.510204	5.39287	0.173053	1	0.998799	1	PLCB3;
Activation of Kainate Receptors upon glutamate binding	1	8	0.510204	4.04634	0.223838	1	1	1	PLCB3;
Vpr-mediated nuclear import of PICs	1	31	0.510204	1.04518	0.626088	1	1	1	NUP37;
Interactions of Vpr with host cellular proteins	1	34	0.510204	0.952989	0.660131	1	1	1	NUP37;
Host Interactions of HIV factors	6	141	3.06122	1.36772	0.276122	1	1	1	ANAPC4; PSMD5; RAC1; UBE2C; NUP37; AP1S2;
Rev-mediated nuclear export of HIV-1 RNA	1	32	0.510204	1.01253	0.637797	1	1	1	NUP37;
Pausing and recovery of Tat-mediated HIV-1 elongation	1	30	0.510204	1.08001	0.614002	1	1	1	POLR2J;
Pausing and recovery of HIV-1 elongation	1	31	0.510204	1.04518	0.626088	1	1	1	POLR2J;
Tat-mediated HIV-1 elongation arrest and recovery	1	30	0.510204	1.08001	0.614002	1	1	1	POLR2J;
Abortive elongation of HIV-1 transcript in the absence of Tat	1	23	0.510204	1.40857	0.517799	1	1	1	POLR2J;
Formation of HIV-1 elongation complex in the absence of HIV-1 Tat	2	42	1.02041	1.53538	0.378323	1	1	1	GTF2H4; POLR2J;
HIV-1 elongation arrest and recovery	1	31	0.510204	1.04518	0.626088	1	1	1	POLR2J;
HIV-1 Transcription Elongation	2	41	1.02041	1.57282	0.367058	1	1	1	GTF2H4; POLR2J;
Formation of the HIV-1 Early Elongation Complex	2	32	1.02041	2.01504	0.263108	1	1	1	GTF2H4; POLR2J;
Tat-mediated elongation of the HIV-1 transcript	2	41	1.02041	1.57282	0.367058	1	1	1	GTF2H4; POLR2J;
Formation of HIV-1 elongation complex containing HIV-1 Tat	2	41	1.02041	1.57282	0.367058	1	1	1	GTF2H4; POLR2J;
Transcription of the HIV genome	2	60	1.02041	1.07484	0.562707	1	1	1	GTF2H4; POLR2J;
HIV-1 Transcription Initiation	2	39	1.02041	1.65346	0.344304	1	1	1	GTF2H4; POLR2J;
RNA Polymerase II HIV-1 Promoter Escape	2	39	1.02041	1.65346	0.344304	1	1	1	GTF2H4; POLR2J;
RNA Pol II CTD phosphorylation and interaction with CE	2	26	1.02041	2.47987	0.193573	1	1	1	GTF2H4; POLR2J;
Late Phase of HIV Life Cycle	3	92	1.53061	1.0498	0.550982	1	1	1	GTF2H4; NUP37; POLR2J;
HIV Life Cycle	3	103	1.53061	0.937692	0.62812	1	1	1	GTF2H4; NUP37; POLR2J;
HIV Infection	8	203	4.08163	1.26616	0.298655	1	1	1	ANAPC4; GTF2H4; PSMD5; RAC1; UBE2C; NUP37; POLR2J; AP1S2;
PLC-gamma1 signalling	1	30	0.510204	1.08001	0.614002	1	1	1	PRKCA;
SOS-mediated signalling	1	15	0.510204	2.1593	0.378353	1	1	1	CDK1;
p75 NTR receptor-mediated signalling	1	39	0.510204	0.830842	0.710154	1	1	1	RAC1;
Signalling by NGF	3	143	1.53061	0.675419	0.829075	1	1	1	CDK1; PRKCA; RAC1;
NRAGE signals death through JNK	1	8	0.510204	4.04634	0.223838	1	1	1	RAC1;
Cell death signalling via NRAGE, NRIF and NADE	1	21	0.510204	1.54265	0.486169	1	1	1	RAC1;
mTOR signalling	2	27	1.02041	2.38806	0.205032	1	1	1	EIF4EBP1; STRADA;
S6K1-mediated signalling	1	11	0.510204	2.94379	0.294255	1	1	1	EIF4EBP1;
mTORC1-mediated signalling	1	11	0.510204	2.94379	0.294255	1	1	1	EIF4EBP1;
Release of eIF4E	1	6	0.510204	5.39287	0.173053	1	0.998799	1	EIF4EBP1;
Regulation of AMPK activity via LKB1	1	16	0.510204	2.02443	0.397771	1	1	1	STRADA;
Energy dependent regulation of mTOR by LKB1-AMPK	1	17	0.510204	1.90542	0.416584	1	1	1	STRADA;
Signalling to p38 via RIT and RIN	1	16	0.510204	2.02443	0.397771	1	1	1	CDK1;
Signalling to RAS	1	21	0.510204	1.54265	0.486169	1	1	1	CDK1;
Signalling to ERKs	1	30	0.510204	1.08001	0.614002	1	1	1	CDK1;
Frs2-mediated activation	1	19	0.510204	1.70495	0.452475	1	1	1	CDK1;
ARMS-mediated activation	1	18	0.510204	1.79962	0.434813	1	1	1	CDK1;
Prolonged ERK activation events	1	20	0.510204	1.61975	0.469588	1	1	1	CDK1;
NGF signalling via TRKA from the plasma membrane	2	107	1.02041	0.602761	0.852211	1	1	1	CDK1; PRKCA;
EGFR downregulation	1	27	0.510204	1.19997	0.575364	1	1	1	ARHGEF7;
Signaling by FGFR	2	95	1.02041	0.678891	0.801829	1	1	1	CDK1; PRKCA;
SHC1 events in EGFR signaling	1	16	0.510204	2.02443	0.397771	1	1	1	CDK1;
GRB2 events in EGFR signaling	1	15	0.510204	2.1593	0.378353	1	1	1	CDK1;
IRS-mediated signalling	3	51	1.53061	1.89358	0.211665	1	1	1	CDK1; EIF4EBP1; STRADA;
PI3K Cascade	2	38	1.02041	1.69696	0.332828	1	1	1	EIF4EBP1; STRADA;
PKB-mediated events	2	28	1.02041	2.3028	0.216562	1	1	1	EIF4EBP1; STRADA;
SHC-related events	1	16	0.510204	2.02443	0.397771	1	1	1	CDK1;
SHC-mediated signalling	1	13	0.510204	2.49125	0.337631	1	1	1	CDK1;
IRS-related events	3	53	1.53061	1.82214	0.228127	1	1	1	CDK1; EIF4EBP1; STRADA;
Signaling by Insulin receptor	3	79	1.53061	1.22252	0.44892	1	1	1	CDK1; EIF4EBP1; STRADA;
Insulin receptor signalling cascade	3	56	1.53061	1.72454	0.253244	1	1	1	CDK1; EIF4EBP1; STRADA;
Phospholipase C-mediated cascade	1	27	0.510204	1.19997	0.575364	1	1	1	PRKCA;
Downstream signaling of activated FGFR	2	66	1.02041	0.977146	0.614939	1	1	1	CDK1; PRKCA;
FRS2-mediated cascade	1	15	0.510204	2.1593	0.378353	1	1	1	CDK1;
Signaling by EGFR	3	98	1.53061	0.985529	0.594208	1	1	1	CDK1; PRKCA; ARHGEF7;
Signal Transduction	15	1208	7.65306	0.398734	0.999999	1	1	1	ANAPC4; CCR4; CDK1; CHEK1; EIF4EBP1; PLCB3; PRKCA; PSMD5; RAC1; UBE2C; ARHGEF7; STRADA; P2RY12; ANXA1; ITGAM;
DAG and IP3 signaling	1	27	0.510204	1.19997	0.575364	1	1	1	PRKCA;
EGFR interacts with phospholipase C-gamma	1	29	0.510204	1.11724	0.601528	1	1	1	PRKCA;
Calmodulin induced events	1	25	0.510204	1.29593	0.547491	1	1	1	PRKCA;
CaM pathway	1	25	0.510204	1.29593	0.547491	1	1	1	PRKCA;
CDC6 association with the ORC:origin complex	1	11	0.510204	2.94379	0.294255	1	1	1	ORC4;
Assembly of the ORC complex at the origin of replication	1	6	0.510204	5.39287	0.173053	1	0.998799	1	ORC4;
Assembly of the pre-replicative complex	8	83	4.08163	3.09653	0.00410923	1	0.11388	0.461446	ANAPC4; ORC4; PSMD5; UBE2C; MCM3; MCM4; MCM2; MCM5;
Autodegradation of Cdh1 by Cdh1:APC/C	3	60	1.53061	1.60959	0.28729	1	1	1	ANAPC4; PSMD5; UBE2C;
APC/C:Cdc20 mediated degradation of Cyclin B	3	22	1.53061	4.38853	0.0296677	1	0.358592	1	ANAPC4; CDK1; UBE2C;
APC/C:Cdc20 mediated degradation of Securin	3	66	1.53061	1.46329	0.338896	1	1	1	ANAPC4; PSMD5; UBE2C;
Conversion from APC/C:Cdc20 to APC/C:Cdh1 in late anaphase	2	16	1.02041	4.02882	0.0870959	1	0.696509	1	ANAPC4; UBE2C;
APC/C:Cdh1 mediated degradation of Cdc20 and other APC/C:Cdh1 targeted proteins in late mitosis/early G1	4	69	2.04082	1.86468	0.167342	1	0.998799	1	ANAPC4; AURKB; PSMD5; UBE2C;
Loss of Nlp from mitotic centrosomes	1	61	0.510204	0.531243	0.856362	1	1	1	CDK1;
Regulation of mitotic cell cycle	6	81	3.06122	2.38072	0.0399104	1	0.437964	1	ANAPC4; AURKB; CDK1; PSMD5; UBE2C; CDK2;
Recruitment of NuMA to mitotic centrosomes	2	12	1.02041	5.37064	0.0519261	1	0.544735	1	CDK1; TUBGCP4;
Loss of proteins required for interphase microtubule organizationÃÂ from the centrosome	1	61	0.510204	0.531243	0.856362	1	1	1	CDK1;
Phosphorylation of Emi1	3	20	1.53061	4.82717	0.0229803	1	0.290387	1	ANAPC4; CDK1; UBE2C;
APC/C-mediated degradation of cell cycle proteins	6	81	3.06122	2.38072	0.0399104	1	0.437964	1	ANAPC4; AURKB; CDK1; PSMD5; UBE2C; CDK2;
Regulation of APC/C activators between G1/S and early anaphase	5	78	2.55102	2.06092	0.0952682	1	0.715799	1	ANAPC4; CDK1; PSMD5; UBE2C; CDK2;
APC/C:Cdc20 mediated degradation of mitotic proteins	4	71	2.04082	1.81217	0.179663	1	1	1	ANAPC4; CDK1; PSMD5; UBE2C;
Phosphorylation of the APC/C	3	18	1.53061	5.36322	0.0172144	1	0.224326	0.908974	ANAPC4; CDK1; UBE2C;
Activation of APC/C and APC/C:Cdc20 mediated degradation of mitotic proteins	4	72	2.04082	1.787	0.185935	1	1	1	ANAPC4; CDK1; PSMD5; UBE2C;
SCF-beta-TrCP mediated degradation of Emi1	3	70	1.53061	1.37968	0.373235	1	1	1	ANAPC4; PSMD5; UBE2C;
Ubiquitin-dependent degradation of Cyclin D	3	66	1.53061	1.46329	0.338896	1	1	1	ANAPC4; PSMD5; UBE2C;
Ubiquitin-dependent degradation of Cyclin D1	3	66	1.53061	1.46329	0.338896	1	1	1	ANAPC4; PSMD5; UBE2C;
Mitotic G2-G2/M phases	6	99	3.06122	1.94791	0.0878515	1	0.696509	1	ANAPC4; CDK1; TUBGCP4; UBE2C; CCNA2; CDK2;
G2 Phase	1	3	0.510204	10.7678	0.090613	1	0.696509	1	CDK2;
G2/M Transition	5	96	2.55102	1.67454	0.179232	1	1	1	ANAPC4; CDK1; TUBGCP4; UBE2C; CCNA2;
Cyclin A/B1 associated events during G2/M transition	2	14	1.02041	4.60395	0.0687579	1	0.59602	1	CDK1; CCNA2;
Phosphorylation of proteins involved in the G2/M transition by Cyclin A:Cdc2 complexes	2	3	1.02041	21.429	0.00283892	1	0.0966393	0.391585	CDK1; CCNA2;
Cyclin B2 mediated events	1	6	0.510204	5.39287	0.173053	1	0.998799	1	CDK1;
Polo-like kinase mediated events	2	18	1.02041	3.58142	0.106694	1	0.78399	1	ANAPC4; UBE2C;
Recruitment of mitotic centrosome proteins and complexes	2	70	1.02041	0.921317	0.647042	1	1	1	CDK1; TUBGCP4;
Centrosome maturation	2	70	1.02041	0.921317	0.647042	1	1	1	CDK1; TUBGCP4;
E2F-enabled inhibition of pre-replication complex formation	2	10	1.02041	6.4437	0.0368732	1	0.41003	1	CDK1; ORC4;
Inhibition of replication initiation of damaged DNA by Rb/E2F1	3	8	1.53061	12.0589	0.00148629	1	0.056344	0.228308	POLA1; RB1; POLA2;
Phosphorylation of proteins involved in G1/S transition by active Cyclin E:Cdk2 complexes	2	4	1.02041	16.0851	0.00556136	1	0.11388	0.461446	RB1; CDK2;
SCF(Skp2)-mediated degradation of p27/p21	4	67	2.04082	1.92034	0.15534	1	0.978864	1	ANAPC4; PSMD5; UBE2C; CDK2;
Cyclin E associated events during G1/S transition	6	78	3.06122	2.47228	0.0340676	1	0.386563	1	ANAPC4; CDK1; PSMD5; RB1; UBE2C; CDK2;
G1 Phase	3	31	1.53061	3.11486	0.0707496	1	0.599037	1	CDK1; CDK6; RB1;
G0 and Early G1	4	21	2.04082	6.12479	0.00360807	1	0.113273	0.458983	CDK1; TOP2A; CDK2; PCNA;
Transport of Mature mRNA Derived from an Intronless Transcript	1	35	0.510204	0.925768	0.670779	1	1	1	NUP37;
Transport of the SLBP independent Mature mRNA	1	32	0.510204	1.01253	0.637797	1	1	1	NUP37;
Transport of Mature mRNA derived from an Intron-Containing Transcript	1	51	0.510204	0.635388	0.802305	1	1	1	NUP37;
Transport of Mature Transcript to Cytoplasm	1	55	0.510204	0.589187	0.826007	1	1	1	NUP37;
Transport of the SLBP Dependant Mature mRNA	1	33	0.510204	0.981859	0.649141	1	1	1	NUP37;
Transport of Mature mRNAs Derived from Intronless Transcripts	1	36	0.510204	0.90006	0.681096	1	1	1	NUP37;
Cyclin D associated events in G1	3	31	1.53061	3.11486	0.0707496	1	0.599037	1	CDK1; CDK6; RB1;
mRNA Splicing - Minor Pathway	2	42	1.02041	1.53538	0.378323	1	1	1	TXNL4A; POLR2J;
mRNA Splicing - Major Pathway	3	107	1.53061	0.902641	0.653822	1	1	1	TXNL4A; POLR2J; YBX1;
mRNA Splicing	3	107	1.53061	0.902641	0.653822	1	1	1	TXNL4A; POLR2J; YBX1;
Processing of Capped Intron-Containing Pre-mRNA	4	138	2.04082	0.93241	0.629149	1	1	1	TXNL4A; NUP37; POLR2J; YBX1;
mRNA Capping	2	28	1.02041	2.3028	0.216562	1	1	1	GTF2H4; POLR2J;
mRNA Processing	5	157	2.55102	1.02396	0.54491	1	1	1	GTF2H4; TXNL4A; NUP37; POLR2J; YBX1;
Unfolded Protein Response	1	63	0.510204	0.514381	0.86526	1	1	1	ASNS;
Insulin Synthesis and Processing	2	132	1.02041	0.48861	0.921801	1	1	1	RPS15A; RPL38;
PERK regulated gene expression	1	11	0.510204	2.94379	0.294255	1	1	1	ASNS;
Extension of Telomeres	4	28	2.04082	4.59414	0.0104162	1	0.155127	0.628578	POLA1; RFC5; PCNA; POLA2;
Telomere C-strand (Lagging Strand) Synthesis	4	22	2.04082	5.84652	0.00430387	1	0.11388	0.461446	POLA1; RFC5; PCNA; POLA2;
Telomere C-strand synthesis initiation	2	6	1.02041	10.7323	0.0133409	1	0.190193	0.770667	POLA1; POLA2;
Telomere Maintenance	4	49	2.04082	2.62563	0.0652952	1	0.588493	1	POLA1; RFC5; PCNA; POLA2;
Diabetes pathways	3	216	1.53061	0.447163	0.967829	1	1	1	RPS15A; ASNS; RPL38;
Polymerase switching on the C-strand of the telomere	4	14	2.04082	9.185	0.000715997	1	0.0291288	0.118031	POLA1; RFC5; PCNA; POLA2;
Processive synthesis on the C-strand of the telomere	1	11	0.510204	2.94379	0.294255	1	1	1	PCNA;
Removal of the Flap Intermediate from the C-strand	1	10	0.510204	3.23788	0.271519	1	1	1	PCNA;
Processive synthesis on the lagging strand	3	15	1.53061	6.43515	0.0102793	1	0.154467	0.625906	POLA1; PCNA; POLA2;
Removal of the Flap Intermediate	3	14	1.53061	6.89448	0.00841399	1	0.134824	0.546312	POLA1; PCNA; POLA2;
Polymerase switching	4	14	2.04082	9.185	0.000715997	1	0.0291288	0.118031	POLA1; RFC5; PCNA; POLA2;
Lagging Strand Synthesis	4	20	2.04082	6.43088	0.00299283	1	0.0998407	0.404557	POLA1; RFC5; PCNA; POLA2;
Nucleosome assembly	2	35	1.02041	1.84237	0.298097	1	1	1	CENPH; CENPK;
Deposition of New CENPA-containing Nucleosomes at the Centromere	2	35	1.02041	1.84237	0.298097	1	1	1	CENPH; CENPK;
Chromosome Maintenance	6	69	3.06122	2.7947	0.0199681	1	0.254494	1	CENPH; CENPK; POLA1; RFC5; PCNA; POLA2;
Association of licensing factors with the pre-replicative complex	1	15	0.510204	2.1593	0.378353	1	1	1	ORC4;
CDT1 association with the CDC6:ORC:origin complex	4	74	2.04082	1.73871	0.198688	1	1	1	ANAPC4; ORC4; PSMD5; UBE2C;
DNA replication initiation	2	6	1.02041	10.7323	0.0133409	1	0.190193	0.770667	POLA1; POLA2;
CDK-mediated phosphorylation and removal of Cdc6	4	66	2.04082	1.94943	0.149466	1	0.947944	1	ANAPC4; PSMD5; UBE2C; CDK2;
Leading Strand Synthesis	4	14	2.04082	9.185	0.000715997	1	0.0291288	0.118031	POLA1; RFC5; PCNA; POLA2;
Chemokine receptors bind chemokines	1	42	0.510204	0.77151	0.736576	1	1	1	CCR4;
Signaling by GPCR	6	800	3.06122	0.241075	1	1	1	1	CCR4; PLCB3; PRKCA; RAC1; P2RY12; ANXA1;
GPCR ligand binding	3	336	1.53061	0.287467	0.998623	1	1	1	CCR4; P2RY12; ANXA1;
Class A/1 (Rhodopsin-like receptors)	3	274	1.53061	0.352511	0.992642	1	1	1	CCR4; P2RY12; ANXA1;
Peptide ligand-binding receptors	2	167	1.02041	0.386213	0.969305	1	1	1	CCR4; ANXA1;
Signaling by PDGF	2	78	1.02041	0.826835	0.704867	1	1	1	CDK1; PRKCA;
Downstream signal transduction	2	75	1.02041	0.859904	0.684161	1	1	1	CDK1; PRKCA;
Signaling by SCF-KIT	4	66	2.04082	1.94943	0.149466	1	0.947944	1	CDK1; CHEK1; PRKCA; RAC1;
Regulation of KIT signaling	1	9	0.510204	3.59724	0.248055	1	1	1	PRKCA;
GPCR downstream signaling	2	530	1.02041	0.121698	1	1	1	1	PLCB3; RAC1;
G-protein beta:gamma signalling	1	11	0.510204	2.94379	0.294255	1	1	1	PLCB3;
G alpha (12/13) signalling events	1	21	0.510204	1.54265	0.486169	1	1	1	RAC1;
G alpha (q) signalling events	1	120	0.510204	0.27007	0.978415	1	1	1	PLCB3;
Opioid Signalling	2	53	1.02041	1.21678	0.495658	1	1	1	PLCB3; PRKCA;
PLC beta mediated events	2	39	1.02041	1.65346	0.344304	1	1	1	PLCB3; PRKCA;
G-protein mediated events	2	40	1.02041	1.61213	0.355716	1	1	1	PLCB3; PRKCA;
G beta:gamma signalling through PLC beta	1	5	0.510204	6.46929	0.146435	1	0.947944	1	PLCB3;
Ca-dependent events	1	27	0.510204	1.19997	0.575364	1	1	1	PRKCA;
Formyl peptide receptors bind formyl peptides and many other ligands	1	5	0.510204	6.46929	0.146435	1	0.947944	1	ANXA1;
P2Y receptors	1	11	0.510204	2.94379	0.294255	1	1	1	P2RY12;
Nucleotide-like (purinergic) receptors	1	15	0.510204	2.1593	0.378353	1	1	1	P2RY12;
Adaptive Immune System	11	237	5.61224	1.49071	0.120468	1	0.823527	1	ANAPC4; PSMD5; RAC1; SEC24B; TRAT1; UBE2C; RAP1GAP2; CD226; ICOS; FCGR2B; CTSS;
TCR signaling	1	47	0.510204	0.689452	0.775394	1	1	1	TRAT1;
tRNA Aminoacylation	2	42	1.02041	1.53538	0.378323	1	1	1	TARS2; HARS2;
Mitochondrial tRNA aminoacylation	2	21	1.02041	3.07003	0.137975	1	0.927992	1	TARS2; HARS2;
Immune System	20	522	10.2041	1.2301	0.194608	1	1	1	ANAPC4; CDK1; PSMD5; RAC1; SEC24B; TRAT1; TXNIP; UBE2C; IFIT1; MAVS; RAP1GAP2; CD226; ICOS; FCGR2B; IL2RA; IFI30; LGALS3; CTSS; IL1B; CD14;
RNA Polymerase II Transcription	2	101	1.02041	0.638565	0.828672	1	1	1	GTF2H4; POLR2J;
Formation and Maturation of mRNA Transcript	5	185	2.55102	0.868992	0.690032	1	1	1	GTF2H4; TXNL4A; NUP37; POLR2J; YBX1;
Signaling by Wnt	3	75	1.53061	1.28772	0.41565	1	1	1	ANAPC4; PSMD5; UBE2C;
Degradation of beta-catenin by the destruction complex	3	75	1.53061	1.28772	0.41565	1	1	1	ANAPC4; PSMD5; UBE2C;
Integrin cell surface interactions	1	72	0.510204	0.450092	0.898979	1	1	1	ITGAM;
Gene Expression	11	378	5.61224	0.934667	0.638214	1	1	1	EIF4EBP1; GTF2H4; MED14; TARS2; TXNL4A; NUP37; POLR2J; RPS15A; HARS2; RPL38; YBX1;
Generic Transcription Pathway	1	35	0.510204	0.925768	0.670779	1	1	1	MED14;
Formation of RNA Pol II elongation complex	2	42	1.02041	1.53538	0.378323	1	1	1	GTF2H4; POLR2J;
RNA Polymerase II Transcription Initiation And Promoter Clearance	2	39	1.02041	1.65346	0.344304	1	1	1	GTF2H4; POLR2J;
RNA Polymerase II Transcription Initiation	2	39	1.02041	1.65346	0.344304	1	1	1	GTF2H4; POLR2J;
RNA Polymerase II Pre-transcription Events	2	58	1.02041	1.1119	0.544211	1	1	1	GTF2H4; POLR2J;
RNA Polymerase II Transcription Pre-Initiation And Promoter Opening	2	39	1.02041	1.65346	0.344304	1	1	1	GTF2H4; POLR2J;
RNA Polymerase II Transcription Elongation	2	42	1.02041	1.53538	0.378323	1	1	1	GTF2H4; POLR2J;
Formation of the Early Elongation Complex	2	32	1.02041	2.01504	0.263108	1	1	1	GTF2H4; POLR2J;
RNA Polymerase II Promoter Escape	2	39	1.02041	1.65346	0.344304	1	1	1	GTF2H4; POLR2J;
RNA Pol II CTD phosphorylation and interaction with CE - 11	2	26	1.02041	2.47987	0.193573	1	1	1	GTF2H4; POLR2J;
Pyruvate metabolism	1	10	0.510204	3.23788	0.271519	1	1	1	PDK3;
Pyruvate metabolism and Citric Acid (TCA) cycle	1	31	0.510204	1.04518	0.626088	1	1	1	PDK3;
The citric acid (TCA) cycle and respiratory electron transport	2	118	1.02041	0.546576	0.887883	1	1	1	COX6A1; PDK3;
Pyrimidine biosynthesis	2	6	1.02041	10.7323	0.0133409	1	0.190193	0.770667	DUT; TYMS;
Synthesis and interconversion of nucleotide di- and triphosphates	2	16	1.02041	4.02882	0.0870959	1	0.696509	1	RRM2; RRM1;
Purine salvage	1	7	0.510204	4.62356	0.198846	1	1	1	ADA;
Pyrimidine metabolism	2	22	1.02041	2.93055	0.148806	1	0.947944	1	DUT; TYMS;
Vitamin D (calciferol) metabolism	1	7	0.510204	4.62356	0.198846	1	1	1	LGMN;
Base Excision Repair	1	19	0.510204	1.70495	0.452475	1	1	1	PCNA;
DNA Repair	9	106	4.59184	2.72741	0.00557542	1	0.11388	0.461446	ATM; CHEK1; FANCD2; FANCI; GTF2H4; POLR2J; NBN; RFC5; PCNA;
Prostanoid metabolism	2	13	1.02041	4.95783	0.0601374	1	0.568556	1	ABCC1; DPEP2;
Leukotriene synthesis	2	9	1.02041	7.15887	0.0301068	1	0.360792	1	ABCC1; DPEP2;
Bile acid and bile salt metabolism	1	27	0.510204	1.19997	0.575364	1	1	1	ALB;
Metabolism of steroid hormones and vitamins A and D	1	32	0.510204	1.01253	0.637797	1	1	1	LGMN;
Recycling of bile acids and salts	1	11	0.510204	2.94379	0.294255	1	1	1	ALB;
Regulation of Lipid Metabolism by Peroxisome proliferator-activated receptor alpha (PPARalpha)	2	32	1.02041	2.01504	0.263108	1	1	1	CPT1A; FASN;
Peroxisomal lipid metabolism	1	20	0.510204	1.61975	0.469588	1	1	1	FAR1;
Plasmalogen biosynthesis	1	4	0.510204	8.08258	0.118964	1	0.816589	1	FAR1;
Resolution of D-loop structures through Holliday junction intermediates	1	6	0.510204	5.39287	0.173053	1	0.998799	1	PCNA;
Resolution of D-loop structures	1	6	0.510204	5.39287	0.173053	1	0.998799	1	PCNA;
Formation of incision complex in GG-NER	1	20	0.510204	1.61975	0.469588	1	1	1	GTF2H4;
Nucleotide Excision Repair	4	49	2.04082	2.62563	0.0652952	1	0.588493	1	GTF2H4; POLR2J; RFC5; PCNA;
Global Genomic NER (GG-NER)	3	33	1.53061	2.92613	0.0821395	1	0.67492	1	GTF2H4; RFC5; PCNA;
Homologous Recombination Repair	4	22	2.04082	5.84652	0.00430387	1	0.11388	0.461446	ATM; CHEK1; NBN; PCNA;
Double-Strand Break Repair	4	27	2.04082	4.76423	0.00914661	1	0.142585	0.577757	ATM; CHEK1; NBN; PCNA;
Homologous recombination repair of replication-independent double-strand breaks	4	22	2.04082	5.84652	0.00430387	1	0.11388	0.461446	ATM; CHEK1; NBN; PCNA;
Recruitment of repair and signaling proteins to double-strand breaks	2	8	1.02041	8.05261	0.0239005	1	0.295799	1	ATM; NBN;
MRN complex relocalizes to nuclear foci	1	4	0.510204	8.08258	0.118964	1	0.816589	1	NBN;
Assembly of the RAD50-MRE11-NBS1 complex at DNA double-strand breaks	1	4	0.510204	8.08258	0.118964	1	0.816589	1	NBN;
Removal of DNA patch containing abasic residue	1	17	0.510204	1.90542	0.416584	1	1	1	PCNA;
Resolution of AP sites via the multiple-nucleotide patch replacement pathway	1	17	0.510204	1.90542	0.416584	1	1	1	PCNA;
Resolution of Abasic Sites (AP sites)	1	19	0.510204	1.70495	0.452475	1	1	1	PCNA;
Metabolism	27	823	13.7755	1.05316	0.417659	1	1	1	ANAPC4; BCKDHB; COX6A1; CYP51A1; PDK3; PHAX; PRKCA; PSMD5; PYCR1; RFK; RRM2; SMN1; UBE2C; ZFP36L1; ADA; NUP37; GEMIN6; GPHN; RPS15A; RRM1; DUT; TYMS; ASNS; RPL38; FASN; SLC2A3; ACAD8;
L13a-mediated translational silencing of Ceruloplasmin expression	2	102	1.02041	0.632305	0.832815	1	1	1	RPS15A; RPL38;
Purine metabolism	1	24	0.510204	1.3499	0.53288	1	1	1	ADA;
Metabolism of nucleotides	5	58	2.55102	2.77146	0.0337034	1	0.38505	1	RRM2; ADA; RRM1; DUT; TYMS;
3' -UTR-mediated translational regulation	2	102	1.02041	0.632305	0.832815	1	1	1	RPS15A; RPL38;
Repair synthesis of patch ~27-30 bases long by DNA polymerase	2	15	1.02041	4.29723	0.0777546	1	0.648474	1	RFC5; PCNA;
Regulation of the Fanconi anemia pathway	2	8	1.02041	8.05261	0.0239005	1	0.295799	1	FANCD2; FANCI;
Fanconi Anemia pathway	2	22	1.02041	2.93055	0.148806	1	0.947944	1	FANCD2; FANCI;
Repair synthesis for gap-filling by DNA polymerase in TC-NER	2	15	1.02041	4.29723	0.0777546	1	0.648474	1	RFC5; PCNA;
Gap-filling DNA repair synthesis and ligation in TC-NER	2	16	1.02041	4.02882	0.0870959	1	0.696509	1	RFC5; PCNA;
Dual incision reaction in TC-NER	2	28	1.02041	2.3028	0.216562	1	1	1	GTF2H4; POLR2J;
Formation of transcription-coupled NER (TC-NER) repair complex	2	28	1.02041	2.3028	0.216562	1	1	1	GTF2H4; POLR2J;
Transcription-coupled NER (TC-NER)	4	44	2.04082	2.92392	0.0470842	1	0.506686	1	GTF2H4; POLR2J; RFC5; PCNA;
Dual incision reaction in GG-NER	1	20	0.510204	1.61975	0.469588	1	1	1	GTF2H4;
Gap-filling DNA repair synthesis and ligation in GG-NER	2	16	1.02041	4.02882	0.0870959	1	0.696509	1	RFC5; PCNA;
Stabilization of p53	5	69	2.55102	2.32969	0.063112	1	0.578411	1	ANAPC4; ATM; CHEK1; PSMD5; UBE2C;
p53-Dependent G1 DNA Damage Response	6	72	3.06122	2.67827	0.0241179	1	0.295799	1	ANAPC4; ATM; CHEK1; PSMD5; UBE2C; CDK2;
p53-Dependent G1/S DNA damage checkpoint	6	72	3.06122	2.67827	0.0241179	1	0.295799	1	ANAPC4; ATM; CHEK1; PSMD5; UBE2C; CDK2;
G1/S DNA Damage Checkpoints	6	76	3.06122	2.53733	0.0304986	1	0.360792	1	ANAPC4; ATM; CHEK1; PSMD5; UBE2C; CDK2;
Pausing and recovery of elongation	1	31	0.510204	1.04518	0.626088	1	1	1	POLR2J;
Autodegradation of the E3 ubiquitin ligase COP1	5	68	2.55102	2.36395	0.0599857	1	0.568556	1	ANAPC4; ATM; CHEK1; PSMD5; UBE2C;
G2/M DNA replication checkpoint	1	4	0.510204	8.08258	0.118964	1	0.816589	1	CDK1;
Chk1/Chk2(Cds1) mediated inactivation of Cyclin B:Cdk1 complex	2	5	1.02041	12.8745	0.00907924	1	0.142585	0.577757	CDK1; CHEK1;
p53-Independent G1/S DNA damage checkpoint	5	70	2.55102	2.29642	0.0663289	1	0.588493	1	ANAPC4; ATM; CHEK1; PSMD5; UBE2C;
Ubiquitin Mediated Degradation of Phosphorylated Cdc25A	5	69	2.55102	2.32969	0.063112	1	0.578411	1	ANAPC4; ATM; CHEK1; PSMD5; UBE2C;
p53-Independent DNA Damage Response	5	70	2.55102	2.29642	0.0663289	1	0.588493	1	ANAPC4; ATM; CHEK1; PSMD5; UBE2C;
Mitotic Spindle Checkpoint	2	19	1.02041	3.39302	0.116895	1	0.816589	1	ANAPC4; UBE2C;
Asparagine N-linked glycosylation	2	77	1.02041	0.837572	0.698093	1	1	1	MAN1A1; SEC24B;
Progressive trimming of alpha-1,2-linked mannose residues from Man9/8/7GlcNAc2 to produce Man5GlcNAc2	1	3	0.510204	10.7678	0.090613	1	0.696509	1	MAN1A1;
N-glycan trimming and elongation in the cis-Golgi	1	5	0.510204	6.46929	0.146435	1	0.947944	1	MAN1A1;
Transport to the Golgi and subsequent modification	2	28	1.02041	2.3028	0.216562	1	1	1	MAN1A1; SEC24B;
Post-translational protein modification	2	114	1.02041	0.565752	0.875943	1	1	1	MAN1A1; SEC24B;
Eukaryotic Translation Termination	2	82	1.02041	0.786507	0.730714	1	1	1	RPS15A; RPL38;
Eukaryotic Translation Elongation	2	85	1.02041	0.758751	0.748823	1	1	1	RPS15A; RPL38;
Peptide chain elongation	2	82	1.02041	0.786507	0.730714	1	1	1	RPS15A; RPL38;
Ribosomal scanning and start codon recognition	1	54	0.510204	0.600095	0.820361	1	1	1	RPS15A;
GTP hydrolysis and joining of the 60S ribosomal subunit	2	103	1.02041	0.626166	0.836868	1	1	1	RPS15A; RPL38;
Translation initiation complex formation	1	54	0.510204	0.600095	0.820361	1	1	1	RPS15A;
Activation of the mRNA upon binding of the cap-binding complex and eIFs, and subsequent binding to 43S	2	55	1.02041	1.17254	0.51547	1	1	1	EIF4EBP1; RPS15A;
Formation of the ternary complex, and subsequently, the 43S complex	1	47	0.510204	0.689452	0.775394	1	1	1	RPS15A;
Translation	3	117	1.53061	0.825499	0.71245	1	1	1	EIF4EBP1; RPS15A; RPL38;
Eukaryotic Translation Initiation	3	110	1.53061	0.878026	0.672255	1	1	1	EIF4EBP1; RPS15A; RPL38;
Cap-dependent Translation Initiation	3	110	1.53061	0.878026	0.672255	1	1	1	EIF4EBP1; RPS15A; RPL38;
Formation of a pool of free 40S subunits	2	92	1.02041	0.701026	0.787062	1	1	1	RPS15A; RPL38;
Metabolism of proteins	5	259	2.55102	0.620718	0.912447	1	1	1	EIF4EBP1; MAN1A1; SEC24B; RPS15A; RPL38;
NEP/NS2 Interacts with the Cellular Export Machinery	1	29	0.510204	1.11724	0.601528	1	1	1	NUP37;
Viral mRNA Translation	3	82	1.53061	1.1778	0.473371	1	1	1	GRSF1; RPS15A; RPL38;
Export of Viral Ribonucleoproteins from Nucleus	1	31	0.510204	1.04518	0.626088	1	1	1	NUP37;
Influenza Viral RNA Transcription and Replication	4	98	2.04082	1.31295	0.365015	1	1	1	GRSF1; POLR2J; RPS15A; RPL38;
Viral Messenger RNA Synthesis	1	14	0.510204	2.31343	0.358314	1	1	1	POLR2J;
Influenza Life Cycle	5	135	2.55102	1.19082	0.412468	1	1	1	GRSF1; NUP37; POLR2J; RPS15A; RPL38;
Transport of Ribonucleoproteins into the Host Nucleus	1	29	0.510204	1.11724	0.601528	1	1	1	NUP37;
Influenza Infection	5	140	2.55102	1.14829	0.443434	1	1	1	GRSF1; NUP37; POLR2J; RPS15A; RPL38;
Meiotic Synapsis	1	47	0.510204	0.689452	0.775394	1	1	1	SYNE1;
Meiotic Recombination	3	42	1.53061	2.29925	0.141766	1	0.947944	1	ATM; NBN; CDK2;
Meiosis	4	72	2.04082	1.787	0.185935	1	1	1	ATM; SYNE1; NBN; CDK2;
Activated AMPK stimulates fatty-acid oxidation in muscle	2	18	1.02041	3.58142	0.106694	1	0.78399	1	CPT1A; STRADA;
Golgi Associated Vesicle Biogenesis	5	27	2.55102	5.95232	0.00128825	1	0.049972	0.202488	PUM1; BLOC1S1; AP1S2; BLOC1S4; FTL;
Lysosome Vesicle Biogenesis	1	15	0.510204	2.1593	0.378353	1	1	1	AP1S2;
Bile salt and organic anion SLC transporters	1	12	0.510204	2.69868	0.316285	1	1	1	SLC16A3;
ER to Golgi Transport	1	9	0.510204	3.59724	0.248055	1	1	1	SEC24B;
Membrane Trafficking	7	84	3.57143	2.67769	0.0153371	1	0.209452	0.848705	PUM1; SEC24B; VAMP7; BLOC1S1; AP1S2; BLOC1S4; FTL;
COPII (Coat Protein 2) Mediated Vesicle Transport	1	9	0.510204	3.59724	0.248055	1	1	1	SEC24B;
Regulation of Insulin Secretion	1	48	0.510204	0.675092	0.782445	1	1	1	PRKCA;
Integration of energy metabolism	2	83	1.02041	0.777032	0.73687	1	1	1	PRKCA; FASN;
Regulation of ornithine decarboxylase (ODC)	3	70	1.53061	1.37968	0.373235	1	1	1	ANAPC4; PSMD5; UBE2C;
ChREBP activates metabolic gene expression	1	6	0.510204	5.39287	0.173053	1	0.998799	1	FASN;
Biological oxidations	1	98	0.510204	0.330692	0.956146	1	1	1	CYP51A1;
Endogenous sterols	1	15	0.510204	2.1593	0.378353	1	1	1	CYP51A1;
Phase 1 - Functionalization of compounds	1	60	0.510204	0.540096	0.851696	1	1	1	CYP51A1;
Cytochrome P450 - arranged by substrate type	1	48	0.510204	0.675092	0.782445	1	1	1	CYP51A1;
Regulation of Insulin Secretion by Acetylcholine	1	3	0.510204	10.7678	0.090613	1	0.696509	1	PRKCA;
Nonsense-Mediated Decay	2	104	1.02041	0.620146	0.840833	1	1	1	RPS15A; RPL38;
Stabilization of mRNA by HuR	1	8	0.510204	4.04634	0.223838	1	1	1	PRKCA;
Destabilization of mRNA by Butyrate Response Factor 1 (BRF1)	1	20	0.510204	1.61975	0.469588	1	1	1	ZFP36L1;
Regulation of mRNA Stability by Proteins that Bind AU-rich Elements	5	104	2.55102	1.54574	0.223271	1	1	1	ANAPC4; PRKCA; PSMD5; UBE2C; ZFP36L1;
Destabilization of mRNA by AUF1 (hnRNP D0)	3	71	1.53061	1.36025	0.381775	1	1	1	ANAPC4; PSMD5; UBE2C;
Metabolism of mRNA	7	234	3.57143	0.961295	0.599143	1	1	1	ANAPC4; PRKCA; PSMD5; UBE2C; ZFP36L1; RPS15A; RPL38;
Metabolism of RNA	11	281	5.61224	1.2573	0.259785	1	1	1	ANAPC4; PHAX; PRKCA; PSMD5; SMN1; UBE2C; ZFP36L1; NUP37; GEMIN6; RPS15A; RPL38;
Respiratory electron transport	1	76	0.510204	0.426406	0.91113	1	1	1	COX6A1;
Regulation of pyruvate dehydrogenase (PDH) complex	1	9	0.510204	3.59724	0.248055	1	1	1	PDK3;
Respiratory electron transport, ATP synthesis by chemiosmotic coupling, and heat production by uncoupling proteins.	1	91	0.510204	0.356127	0.94508	1	1	1	COX6A1;
Metabolism of amino acids and derivatives	7	188	3.57143	1.19649	0.370113	1	1	1	ANAPC4; BCKDHB; PSMD5; PYCR1; UBE2C; ASNS; ACAD8;
Branched-chain amino acid catabolism	2	17	1.02041	3.79197	0.0967519	1	0.723687	1	BCKDHB; ACAD8;
Amino acid synthesis and interconversion (transamination)	2	10	1.02041	6.4437	0.0368732	1	0.41003	1	PYCR1; ASNS;
Molybdenum cofactor biosynthesis	1	6	0.510204	5.39287	0.173053	1	0.998799	1	GPHN;
Vitamin B2 (riboflavin) metabolism	1	4	0.510204	8.08258	0.118964	1	0.816589	1	RFK;
Vitamin B5 (pantothenate) metabolism	1	9	0.510204	3.59724	0.248055	1	1	1	FASN;
Nonsense Mediated Decay Enhanced by the Exon Junction Complex	2	104	1.02041	0.620146	0.840833	1	1	1	RPS15A; RPL38;
Nonsense Mediated Decay Independent of the Exon Junction Complex	2	87	1.02041	0.74131	0.76031	1	1	1	RPS15A; RPL38;
Metabolism of non-coding RNA	4	50	2.04082	2.57312	0.0693212	1	0.59602	1	PHAX; SMN1; NUP37; GEMIN6;
snRNP Assembly	4	50	2.04082	2.57312	0.0693212	1	0.59602	1	PHAX; SMN1; NUP37; GEMIN6;
Metabolism of vitamins and cofactors	4	47	2.04082	2.73733	0.057624	1	0.568556	1	RFK; GPHN; FASN; SLC2A3;
Metabolism of water-soluble vitamins and cofactors	4	47	2.04082	2.73733	0.057624	1	0.568556	1	RFK; GPHN; FASN; SLC2A3;
Vitamin C (ascorbate) metabolism	1	6	0.510204	5.39287	0.173053	1	0.998799	1	SLC2A3;
Glucose transport	1	38	0.510204	0.852701	0.700773	1	1	1	NUP37;
Regulation of Glucokinase by Glucokinase Regulatory Protein	1	29	0.510204	1.11724	0.601528	1	1	1	NUP37;
Hexose transport	1	40	0.510204	0.810076	0.719242	1	1	1	NUP37;
BMAL1:CLOCK/NPAS2 Activates Gene Expression	2	23	1.02041	2.80319	0.159801	1	0.990884	1	HDAC3; RORA;
Metabolism of carbohydrates	2	92	1.02041	0.701026	0.787062	1	1	1	GALT; NUP37;
Circadian Clock	2	32	1.02041	2.01504	0.263108	1	1	1	HDAC3; RORA;
Import of palmitoyl-CoA into the mitochondrial matrix	1	8	0.510204	4.04634	0.223838	1	1	1	CPT1A;
Fatty Acyl-CoA Biosynthesis	3	18	1.53061	5.36322	0.0172144	1	0.224326	0.908974	ELOVL1; ACSL4; FASN;
Synthesis of very long-chain fatty acyl-CoAs	2	14	1.02041	4.60395	0.0687579	1	0.59602	1	ELOVL1; ACSL4;
Fatty acid, triacylglycerol, and ketone body metabolism	4	83	2.04082	1.5502	0.258918	1	1	1	CPT1A; ELOVL1; ACSL4; FASN;
Triglyceride Biosynthesis	3	28	1.53061	3.44847	0.0551368	1	0.557383	1	ELOVL1; ACSL4; FASN;
Lipoprotein metabolism	1	27	0.510204	1.19997	0.575364	1	1	1	ALB;
HDL-mediated lipid transport	1	15	0.510204	2.1593	0.378353	1	1	1	ALB;
Galactose catabolism	1	3	0.510204	10.7678	0.090613	1	0.696509	1	GALT;
Cell-cell junction organization	1	45	0.510204	0.720088	0.760601	1	1	1	JUP;
Cell-Cell communication	4	117	2.04082	1.09975	0.497866	1	1	1	LIMS1; RAC1; JUP; SKAP2;
Cell junction organization	2	69	1.02041	0.934667	0.639219	1	1	1	LIMS1; JUP;
Transmembrane transport of small molecules	5	378	2.55102	0.425312	0.993167	1	1	1	ABCC1; NUP37; ALB; SLC16A3; SLC2A3;
SLC-mediated transmembrane transport	4	247	2.04082	0.520958	0.953683	1	1	1	NUP37; ALB; SLC16A3; SLC2A3;
ABC-family proteins mediated transport	1	25	0.510204	1.29593	0.547491	1	1	1	ABCC1;
Regulation of cytoskeletal remodeling and cell spreading by IPP complex components	1	8	0.510204	4.04634	0.223838	1	1	1	LIMS1;
Signal regulatory protein (SIRP) family interactions	1	11	0.510204	2.94379	0.294255	1	1	1	SKAP2;
Adherens junctions interactions	1	27	0.510204	1.19997	0.575364	1	1	1	JUP;
Cell-extracellular matrix interactions	1	16	0.510204	2.02443	0.397771	1	1	1	LIMS1;
DSCAM interactions	1	9	0.510204	3.59724	0.248055	1	1	1	RAC1;
Proton-coupled monocarboxylate transport	1	4	0.510204	8.08258	0.118964	1	0.816589	1	SLC16A3;
Transport of glucose and other sugars, bile salts and organic acids, metal ions and amine compounds	2	94	1.02041	0.686112	0.79701	1	1	1	SLC16A3; SLC2A3;
Facilitative Na+-independent glucose transporters	1	12	0.510204	2.69868	0.316285	1	1	1	SLC2A3;
Lipid digestion, mobilization, and transport	1	46	0.510204	0.704437	0.768115	1	1	1	ALB;
Metabolism of lipids and lipoproteins	15	257	7.65306	1.87415	0.0138931	1	0.196387	0.795764	ABCC1; CYP51A1; DHCR24; EBP; FAR1; CPT1A; LGMN; DHCR7; DPEP2; ELOVL1; PMVK; ALB; ACSL4; FASN; HMGCS1;
Transport of vitamins, nucleosides, and related molecules	1	30	0.510204	1.08001	0.614002	1	1	1	ALB;
Transport of organic anions	1	10	0.510204	3.23788	0.271519	1	1	1	ALB;
Class I MHC mediated antigen processing & presentation	5	101	2.55102	1.59165	0.20637	1	1	1	ANAPC4; PSMD5; SEC24B; UBE2C; CTSS;
Antigen processing: Ubiquitination & Proteasome degradation	3	69	1.53061	1.39968	0.364673	1	1	1	ANAPC4; PSMD5; UBE2C;
CD28 co-stimulation	1	36	0.510204	0.90006	0.681096	1	1	1	RAC1;
CD28 dependent Vav1 pathway	1	18	0.510204	1.79962	0.434813	1	1	1	RAC1;
Downstream TCR signaling	1	32	0.510204	1.01253	0.637797	1	1	1	TRAT1;
Costimulation by the CD28 family	2	52	1.02041	1.24017	0.485563	1	1	1	RAC1; ICOS;
Transcription	3	178	1.53061	0.542619	0.92075	1	1	1	EHMT2; GTF2H4; POLR2J;
RNA Polymerase I, RNA Polymerase III, and Mitochondrial Transcription	2	92	1.02041	0.701026	0.787062	1	1	1	EHMT2; GTF2H4;
RNA Polymerase I Transcription	2	56	1.02041	1.15161	0.525182	1	1	1	EHMT2; GTF2H4;
RNA Polymerase I Promoter Clearance	2	54	1.02041	1.19425	0.505628	1	1	1	EHMT2; GTF2H4;
Regulation of Apoptosis	3	75	1.53061	1.28772	0.41565	1	1	1	ANAPC4; PSMD5; UBE2C;
Regulation of activated PAK-2p34 by proteasome mediated degradation	3	66	1.53061	1.46329	0.338896	1	1	1	ANAPC4; PSMD5; UBE2C;
RNA Polymerase I Promoter Escape	1	20	0.510204	1.61975	0.469588	1	1	1	GTF2H4;
RNA Polymerase I Transcription Initiation	2	24	1.02041	2.68644	0.17094	1	0.998799	1	EHMT2; GTF2H4;
RNA Polymerase I Chain Elongation	1	48	0.510204	0.675092	0.782445	1	1	1	GTF2H4;
RNA Polymerase I Transcription Termination	1	21	0.510204	1.54265	0.486169	1	1	1	GTF2H4;
Cdc20:Phospho-APC/C mediated degradation of Cyclin A	4	69	2.04082	1.86468	0.167342	1	0.998799	1	ANAPC4; CDK1; PSMD5; UBE2C;
Apoptotic cleavage of cellular proteins	1	39	0.510204	0.830842	0.710154	1	1	1	DSG1;
Apoptotic cleavage of cell adhesion proteins	1	12	0.510204	2.69868	0.316285	1	1	1	DSG1;
Apoptotic execution phase	1	48	0.510204	0.675092	0.782445	1	1	1	DSG1;
BH3-only proteins associate with and inactivate anti-apoptotic BCL-2 members	2	3	1.02041	21.429	0.00283892	1	0.0966393	0.391585	BCL2; BCL2L1;
Intrinsic Pathway for Apoptosis	2	31	1.02041	2.08002	0.251435	1	1	1	BCL2; BCL2L1;
Activation of BH3-only proteins	1	17	0.510204	1.90542	0.416584	1	1	1	BCL2;
Activation of BAD and translocation to mitochondria	1	7	0.510204	4.62356	0.198846	1	1	1	BCL2;
Apoptosis	6	158	3.06122	1.22057	0.370112	1	1	1	ANAPC4; BCL2; BCL2L1; PSMD5; UBE2C; DSG1;
Steroid hormones	1	25	0.510204	1.29593	0.547491	1	1	1	LGMN;
TRIF mediated TLR3 signaling	1	56	0.510204	0.578667	0.831476	1	1	1	CDK1;
Toll Like Receptor 3 (TLR3) Cascade	1	56	0.510204	0.578667	0.831476	1	1	1	CDK1;
TRAF6 Mediated Induction of proinflammatory cytokines	1	50	0.510204	0.648093	0.795894	1	1	1	CDK1;
Toll Like Receptor 5 (TLR5) Cascade	1	60	0.510204	0.540096	0.851696	1	1	1	CDK1;
Toll Like Receptor 7/8 (TLR7/8) Cascade	1	62	0.510204	0.522676	0.860882	1	1	1	CDK1;
MyD88 dependent cascade initiated on endosome	1	60	0.510204	0.540096	0.851696	1	1	1	CDK1;
TRAF6 mediated induction of NFkB and MAP kinases upon TLR7/8 or 9 activation	1	59	0.510204	0.549248	0.84688	1	1	1	CDK1;
Toll Like Receptor 9 (TLR9) Cascade	1	65	0.510204	0.498556	0.873609	1	1	1	CDK1;
Activated TLR4 signalling	1	72	0.510204	0.450092	0.898979	1	1	1	CDK1;
MyD88:Mal cascade initiated on plasma membrane	1	62	0.510204	0.522676	0.860882	1	1	1	CDK1;
Toll Like Receptor 4 (TLR4) Cascade	2	76	1.02041	0.848591	0.691191	1	1	1	CDK1; CD14;
LPS transferred from LBP carrier to CD14	1	2	0.510204	16.125	0.061355	1	0.568556	1	CD14;
NFkB and MAP kinases activation mediated by TLR4 signaling repertoire	1	54	0.510204	0.600095	0.820361	1	1	1	CDK1;
MyD88-independent cascade initiated on plasma membrane	1	58	0.510204	0.558717	0.841908	1	1	1	CDK1;
Innate Immune System	5	183	2.55102	0.878488	0.68078	1	1	1	CDK1; TXNIP; MAVS; LGALS3; CD14;
Toll Receptor Cascades	2	90	1.02041	0.716603	0.77669	1	1	1	CDK1; CD14;
Endosomal/Vacuolar pathway	1	9	0.510204	3.59724	0.248055	1	1	1	CTSS;
Cross-presentation of soluble exogenous antigens (endosomes)	3	67	1.53061	1.44145	0.3475	1	1	1	ANAPC4; PSMD5; UBE2C;
Immunoregulatory interactions between a Lymphoid and a non-Lymphoid cell	2	52	1.02041	1.24017	0.485563	1	1	1	CD226; FCGR2B;
Rap1 signalling	1	10	0.510204	3.23788	0.271519	1	1	1	RAP1GAP2;
Antigen Presentation: Folding, assembly and peptide loading of class I MHC	1	23	0.510204	1.40857	0.517799	1	1	1	SEC24B;
Antigen processing-Cross presentation	4	86	2.04082	1.49613	0.279773	1	1	1	ANAPC4; PSMD5; UBE2C; CTSS;
ER-Phagosome pathway	3	80	1.53061	1.20724	0.457122	1	1	1	ANAPC4; PSMD5; UBE2C;
Toll Like Receptor 10 (TLR10) Cascade	1	60	0.510204	0.540096	0.851696	1	1	1	CDK1;
MAP kinase activation in TLR cascade	1	30	0.510204	1.08001	0.614002	1	1	1	CDK1;
MyD88 cascade initiated on plasma membrane	1	59	0.510204	0.549248	0.84688	1	1	1	CDK1;
Advanced glycosylation endproduct receptor signaling	1	9	0.510204	3.59724	0.248055	1	1	1	LGALS3;
RIG-I/MDA5 mediated induction of IFN-alpha/beta pathways	1	67	0.510204	0.483676	0.881443	1	1	1	MAVS;
TRAF3-dependent IRF activation pathway	1	10	0.510204	3.23788	0.271519	1	1	1	MAVS;
NF-kB activation through FADD/RIP-1 pathway mediated by caspase-8 and -10	1	8	0.510204	4.04634	0.223838	1	1	1	MAVS;
TRAF6 mediated IRF7 activation	1	25	0.510204	1.29593	0.547491	1	1	1	MAVS;
TRAF6 mediated NF-kB activation	1	13	0.510204	2.49125	0.337631	1	1	1	MAVS;
Cytokine Signaling in Immune system	5	193	2.55102	0.832973	0.725218	1	1	1	CDK1; IFIT1; IL2RA; IFI30; IL1B;
Negative regulators of RIG-I/MDA5 signaling	1	28	0.510204	1.15713	0.588653	1	1	1	MAVS;
Interferon alpha/beta signaling	1	77	0.510204	0.420869	0.913933	1	1	1	IFIT1;
Interferon Signaling	2	98	1.02041	0.65811	0.815684	1	1	1	IFIT1; IFI30;
Interferon gamma signaling	1	47	0.510204	0.689452	0.775394	1	1	1	IFI30;
Interleukin-1 signaling	1	39	0.510204	0.830842	0.710154	1	1	1	IL1B;
Interleukin-2 signaling	2	28	1.02041	2.3028	0.216562	1	1	1	CDK1; IL2RA;
Signaling by Interleukins	3	92	1.53061	1.0498	0.550982	1	1	1	CDK1; IL2RA; IL1B;
Interleukin-1 processing	1	6	0.510204	5.39287	0.173053	1	0.998799	1	IL1B;
Toll Like Receptor 2 (TLR2) Cascade	1	65	0.510204	0.498556	0.873609	1	1	1	CDK1;
Toll Like Receptor TLR1:TLR2 Cascade	1	64	0.510204	0.506345	0.869501	1	1	1	CDK1;
Toll Like Receptor TLR6:TLR2 Cascade	1	64	0.510204	0.506345	0.869501	1	1	1	CDK1;
Nucleotide-binding domain, leucine rich repeat containing receptor (NLR) signaling pathways	1	43	0.510204	0.753572	0.74484	1	1	1	TXNIP;
The NLRP3 inflammasome	1	11	0.510204	2.94379	0.294255	1	1	1	TXNIP;
Inflammasomes	1	17	0.510204	1.90542	0.416584	1	1	1	TXNIP;
fatty acid activation	1	6	0.510204	5.39287	0.173053	1	0.998799	1	ACSL4;
sulfate activation for sulfonation	1	2	0.510204	16.125	0.061355	1	0.568556	1	PAPSS2;
superpathway of serine and glycine biosynthesis I	1	4	0.510204	8.08258	0.118964	1	0.816589	1	PSAT1;
diphthamide biosynthesis	1	1	0.510204	32.0903	0.0311606	1	0.360943	1	DPH5;
proline biosynthesis I	1	4	0.510204	8.08258	0.118964	1	0.816589	1	PYCR1;
arginine degradation VI (arginase 2 pathway)	1	6	0.510204	5.39287	0.173053	1	0.998799	1	PYCR1;
proline biosynthesis II (from arginine)	1	5	0.510204	6.46929	0.146435	1	0.947944	1	PYCR1;
serine biosynthesis	1	2	0.510204	16.125	0.061355	1	0.568556	1	PSAT1;
asparagine biosynthesis I	1	1	0.510204	32.0903	0.0311606	1	0.360943	1	ASNS;
chondroitin sulfate biosynthesis	1	20	0.510204	1.61975	0.469588	1	1	1	CHST11;
chondroitin sulfate biosynthesis (late stages)	1	12	0.510204	2.69868	0.316285	1	1	1	CHST11;
colanic acid building blocks biosynthesis	1	13	0.510204	2.49125	0.337631	1	1	1	GALT;
mevalonate pathway I	2	10	1.02041	6.4437	0.0368732	1	0.41003	1	PMVK; HMGCS1;
superpathway of geranylgeranyldiphosphate biosynthesis I (via mevalonate)	2	13	1.02041	4.95783	0.0601374	1	0.568556	1	PMVK; HMGCS1;
flavin biosynthesis IV (mammalian)	1	2	0.510204	16.125	0.061355	1	0.568556	1	RFK;
tetrahydrofolate salvage from 5,10-methenyltetrahydrofolate	1	4	0.510204	8.08258	0.118964	1	0.816589	1	MTHFD2;
glutamate removal from folates	1	1	0.510204	32.0903	0.0311606	1	0.360943	1	GGH;
folate transformations	1	9	0.510204	3.59724	0.248055	1	1	1	MTHFD2;
leukotriene biosynthesis	1	6	0.510204	5.39287	0.173053	1	0.998799	1	DPEP2;
fatty acid biosynthesis initiation II	1	2	0.510204	16.125	0.061355	1	0.568556	1	FASN;
gamma-linolenate biosynthesis II (animals)	1	7	0.510204	4.62356	0.198846	1	1	1	ACSL4;
oleate biosynthesis II (animals)	1	7	0.510204	4.62356	0.198846	1	1	1	SCD;
palmitate biosynthesis I (animals)	1	2	0.510204	16.125	0.061355	1	0.568556	1	FASN;
stearate biosynthesis I (animals)	2	12	1.02041	5.37064	0.0519261	1	0.544735	1	ELOVL1; ACSL4;
zymosterol biosynthesis	1	6	0.510204	5.39287	0.173053	1	0.998799	1	CYP51A1;
guanosine nucleotides de novo biosynthesis	2	14	1.02041	4.60395	0.0687579	1	0.59602	1	RRM2; RRM1;
adenine and adenosine salvage III	1	4	0.510204	8.08258	0.118964	1	0.816589	1	ADA;
pyrimidine deoxyribonucleotides de novo biosynthesis	4	14	2.04082	9.185	0.000715997	1	0.0291288	0.118031	RRM2; RRM1; DUT; TYMS;
superpathway of N-acetylglucosamine, N-acetylmannosamine and N-acetylneuraminate degradation	1	5	0.510204	6.46929	0.146435	1	0.947944	1	NPL;
histamine degradation	1	2	0.510204	16.125	0.061355	1	0.568556	1	HNMT;
N-acetylneuraminate and N-acetylmannosamine degradation	1	2	0.510204	16.125	0.061355	1	0.568556	1	NPL;
branched-chain alpha-keto acid dehydrogenase complex	1	4	0.510204	8.08258	0.118964	1	0.816589	1	BCKDHB;
histidine degradation III	1	7	0.510204	4.62356	0.198846	1	1	1	MTHFD2;
valine degradation I	1	12	0.510204	2.69868	0.316285	1	1	1	ACAD8;
galactose degradation I (Leloir pathway)	2	4	1.02041	16.0851	0.00556136	1	0.11388	0.461446	GALT; GALM;
sucrose degradation	1	7	0.510204	4.62356	0.198846	1	1	1	GALM;
mitochondrial L-carnitine shuttle pathway	1	2	0.510204	16.125	0.061355	1	0.568556	1	CPT1A;
sphingosine and sphingosine-1-phosphate metabolism	1	7	0.510204	4.62356	0.198846	1	1	1	ASAH1;
fatty acid beta-oxidation I	1	19	0.510204	1.70495	0.452475	1	1	1	ACSL4;
purine ribonucleosides degradation to ribose-1-phosphate	1	3	0.510204	10.7678	0.090613	1	0.696509	1	ADA;
purine nucleotides degradation II (aerobic)	1	12	0.510204	2.69868	0.316285	1	1	1	ADA;
adenosine nucleotides degradation II	1	9	0.510204	3.59724	0.248055	1	1	1	ADA;
glutathione-mediated detoxification	1	19	0.510204	1.70495	0.452475	1	1	1	GGH;
Validated transcriptional targets of TAp63 isoforms	3	54	1.53061	1.7884	0.236448	1	1	1	NOC2L; ADA; S100A2;
Wnt signaling network	7	200	3.57143	1.12471	0.432024	1	1	1	CDK6; RAC1; TNIK; CSNK1G1; CUL3; LRP5; KRT1;
Beta2 integrin cell surface interactions	2	28	1.02041	2.3028	0.216562	1	1	1	THY1; ITGAM;
Osteopontin-mediated events	1	29	0.510204	1.11724	0.601528	1	1	1	RAC1;
Regulation of cytoplasmic and nuclear SMAD2/3 signaling	14	305	7.14286	1.474	0.093331	1	0.707619	1	ATM; BCL2; BCL2L1; CEBPB; EIF4EBP1; PRKCA; RAC1; FGR; KRT19; DAB2; KRT8; IL2RA; KPNA2; CDK2;
Aurora C signaling	1	5	0.510204	6.46929	0.146435	1	0.947944	1	AURKB;
IL2 signaling events mediated by STAT5	5	28	2.55102	5.73981	0.00152916	1	0.0566807	0.229672	BCL2; BCL2L1; CDK6; CCNA2; IL2RA;
ErbB2/ErbB3 signaling events	2	38	1.02041	1.69696	0.332828	1	1	1	RAC1; USP8;
Validated targets of C-MYC transcriptional repression	3	63	1.53061	1.53296	0.313063	1	1	1	BCL2; HDAC3; ZFP36L1;
IL6-mediated signaling events	3	47	1.53061	2.0547	0.17963	1	1	1	BCL2L1; CEBPB; RAC1;
Signaling events mediated by the Hedgehog family	3	65	1.53061	1.4858	0.330285	1	1	1	FBXW11; CSNK1G1; LGALS3;
EphrinA-EPHA pathway	4	43	2.04082	2.99191	0.0438316	1	0.474747	1	RAC1; FGR; VAV2; ARHGEF15;
Circadian rhythm pathway	2	16	1.02041	4.02882	0.0870959	1	0.696509	1	CHEK1; TIMELESS;
Canonical NF-kappaB pathway	2	35	1.02041	1.84237	0.298097	1	1	1	ATM; PRKCA;
Signaling events mediated by HDAC Class I	1	113	0.510204	0.286799	0.972946	1	1	1	HDAC3;
EPHA forward signaling	3	31	1.53061	3.11486	0.0707496	1	0.599037	1	FGR; VAV2; ARHGEF15;
Integrins in angiogenesis	1	64	0.510204	0.506345	0.869501	1	1	1	RAC1;
Syndecan-1-mediated signaling events	55	1297	28.0612	1.36104	0.00711821	1	0.121155	0.490923	ABCC1; ASAP2; ATM; BCL2; BCL2L1; CBLL1; CCNK; CD82; CDK1; CDK6; CEBPB; CHEK1; DDX18; DLG1; EIF4EBP1; FBXW11; HDAC3; MMP14; PRKCA; RAC1; RB1; TNIK; USP8; VAMP3; ZFP36L1; ARHGEF7; FGR; KRT19; LRP1; VAV2; BMI1; CCNA2; CSNK1G1; CUL3; DGCR8; NBN; PTPRJ; S100A2; FCGR2B; KRT5; DAB2; KRT8; IL2RA; JUP; KPNA2; ALOX15; ELANE; KRT14; CDK2; KRT1; PCNA; SSH1; THY1; RORA; ITGAM;
Downstream signaling in na&#xef;ve CD8+ T cells	2	65	1.02041	0.992177	0.606574	1	1	1	PRKCA; IL2RA;
Regulation of CDC42 activity	29	768	14.7959	1.21214	0.155515	1	0.978864	1	ATM; BCL2; BCL2L1; CDK1; CDK6; CEBPB; DLG1; EIF4EBP1; MYO9B; PRKCA; RAC1; RB1; TNIK; ARHGEF7; FGR; KRT19; VAV2; CCNA2; CUL3; ARHGEF15; KRT5; DAB2; KRT8; IL2RA; KPNA2; KRT14; CDK2; KRT1; RORA;
Notch-mediated HES/HEY network	2	94	1.02041	0.686112	0.79701	1	1	1	RB1; GAA;
Glypican pathway	56	1335	28.5714	1.34634	0.00824399	1	0.134824	0.546312	ABCC1; ASAP2; ATM; BCL2; BCL2L1; CBLL1; CCNK; CD82; CDK1; CDK6; CEBPB; CHEK1; DDX18; DLG1; EIF4EBP1; FBXW11; HDAC3; MMP14; PRKCA; RAC1; RB1; TNIK; USP8; VAMP3; ZFP36L1; ARHGEF7; FGR; KRT19; LRP1; VAV2; BMI1; CCNA2; CSNK1G1; CUL3; DGCR8; NBN; PTPRJ; LRP5; S100A2; FCGR2B; KRT5; DAB2; KRT8; IL2RA; JUP; KPNA2; ALOX15; ELANE; KRT14; CDK2; KRT1; PCNA; SSH1; THY1; RORA; ITGAM;
Arf1 pathway	1	20	0.510204	1.61975	0.469588	1	1	1	RAC1;
GMCSF-mediated signaling events	55	1289	28.0612	1.36949	0.00624566	1	0.11388	0.461446	ABCC1; ASAP2; ATM; BCL2; BCL2L1; CBLL1; CCNK; CD82; CDK1; CDK6; CEBPB; CHEK1; DDX18; DLG1; EIF4EBP1; FBXW11; HDAC3; MMP14; PRKCA; RAC1; RB1; TNIK; USP8; VAMP3; ZFP36L1; ARHGEF7; FGR; KRT19; LRP1; VAV2; BMI1; CCNA2; CSNK1G1; CUL3; DGCR8; NBN; PTPRJ; S100A2; FCGR2B; KRT5; DAB2; KRT8; IL2RA; JUP; KPNA2; ALOX15; ELANE; KRT14; CDK2; KRT1; PCNA; SSH1; THY1; RORA; ITGAM;
Validated transcriptional targets of deltaNp63 isoforms	6	64	3.06122	3.013	0.0141821	1	0.197597	0.800671	ATM; ADA; KRT5; KRT14; TOP2A; FASN;
IL27-mediated signaling events	1	26	0.510204	1.2461	0.561648	1	1	1	IL1B;
Insulin Pathway	55	1285	28.0612	1.37375	0.00584504	1	0.11388	0.461446	ABCC1; ASAP2; ATM; BCL2; BCL2L1; CBLL1; CCNK; CD82; CDK1; CDK6; CEBPB; CHEK1; DDX18; DLG1; EIF4EBP1; FBXW11; HDAC3; MMP14; PRKCA; RAC1; RB1; TNIK; USP8; VAMP3; ZFP36L1; ARHGEF7; FGR; KRT19; LRP1; VAV2; BMI1; CCNA2; CSNK1G1; CUL3; DGCR8; NBN; PTPRJ; S100A2; FCGR2B; KRT5; DAB2; KRT8; IL2RA; JUP; KPNA2; ALOX15; ELANE; KRT14; CDK2; KRT1; PCNA; SSH1; THY1; RORA; ITGAM;
C-MYC pathway	6	149	3.06122	1.29429	0.319827	1	1	1	BCL2; DDX18; HDAC3; ZFP36L1; BMI1; NBN;
Signaling events mediated by HDAC Class II	1	38	0.510204	0.852701	0.700773	1	1	1	HDAC3;
Stabilization and expansion of the E-cadherin adherens junction	9	275	4.59184	1.05136	0.489287	1	1	1	CBLL1; CDK6; DLG1; RAC1; TNIK; VAV2; JUP; KRT1; SSH1;
FOXA transcription factor networks	4	81	2.04082	1.58847	0.245196	1	1	1	CEBPB; CPT1A; ALB; HMGCS1;
Glypican 3 network	7	206	3.57143	1.09195	0.462776	1	1	1	CDK6; RAC1; TNIK; CSNK1G1; CUL3; LRP5; KRT1;
Nectin adhesion pathway	55	1292	28.0612	1.36631	0.00656143	1	0.115205	0.466814	ABCC1; ASAP2; ATM; BCL2; BCL2L1; CBLL1; CCNK; CD82; CDK1; CDK6; CEBPB; CHEK1; DDX18; DLG1; EIF4EBP1; FBXW11; HDAC3; MMP14; PRKCA; RAC1; RB1; TNIK; USP8; VAMP3; ZFP36L1; ARHGEF7; FGR; KRT19; LRP1; VAV2; BMI1; CCNA2; CSNK1G1; CUL3; DGCR8; NBN; PTPRJ; S100A2; FCGR2B; KRT5; DAB2; KRT8; IL2RA; JUP; KPNA2; ALOX15; ELANE; KRT14; CDK2; KRT1; PCNA; SSH1; THY1; RORA; ITGAM;
FGF signaling pathway	1	48	0.510204	0.675092	0.782445	1	1	1	SSH1;
Neurotrophic factor-mediated Trk receptor signaling	1	101	0.510204	0.320871	0.960181	1	1	1	RAC1;
Nephrin/Neph1 signaling in the kidney podocyte	1	25	0.510204	1.29593	0.547491	1	1	1	RAC1;
Aurora B signaling	5	41	2.55102	3.92032	0.00840876	1	0.134824	0.546312	AURKB; DES; KIF23; SMC2; CUL3;
CD40/CD40L signaling	3	58	1.53061	1.66509	0.270205	1	1	1	ATM; BCL2L1; PRKCA;
TRAIL signaling pathway	58	1325	29.5918	1.40494	0.00265989	1	0.0943977	0.382502	ABCC1; ASAP2; ATM; BCL2; BCL2L1; CASP2; CBLL1; CCNK; CD82; CDK1; CDK6; CEBPB; CHEK1; DDX18; DLG1; EIF4EBP1; FBXW11; HDAC3; MMP14; PRKCA; RAC1; RB1; TNIK; USP8; VAMP3; ZFP36L1; ARHGEF7; FGR; KRT19; LRP1; VAV2; BMI1; CCNA2; CSNK1G1; CUL3; DGCR8; NBN; PTPRJ; S100A2; FCGR2B; KRT5; KRT18; DAB2; KRT8; IL2RA; JUP; KPNA2; ALOX15; ELANE; KRT14; CDK2; KRT1; PCNA; ASAH1; SSH1; THY1; RORA; ITGAM;
LPA receptor mediated events	4	100	2.04082	1.28669	0.379297	1	1	1	ATM; PLCB3; PRKCA; RAC1;
IGF1 pathway	55	1288	28.0612	1.37055	0.00614336	1	0.11388	0.461446	ABCC1; ASAP2; ATM; BCL2; BCL2L1; CBLL1; CCNK; CD82; CDK1; CDK6; CEBPB; CHEK1; DDX18; DLG1; EIF4EBP1; FBXW11; HDAC3; MMP14; PRKCA; RAC1; RB1; TNIK; USP8; VAMP3; ZFP36L1; ARHGEF7; FGR; KRT19; LRP1; VAV2; BMI1; CCNA2; CSNK1G1; CUL3; DGCR8; NBN; PTPRJ; S100A2; FCGR2B; KRT5; DAB2; KRT8; IL2RA; JUP; KPNA2; ALOX15; ELANE; KRT14; CDK2; KRT1; PCNA; SSH1; THY1; RORA; ITGAM;
PLK1 signaling events	8	104	4.08163	2.47133	0.0154452	1	0.209452	0.848705	ATM; AURKB; BORA; CDK1; FBXW11; NDEL1; PRKCA; ARHGEF7;
Lissencephaly gene (LIS1) in neuronal migration and development	2	31	1.02041	2.08002	0.251435	1	1	1	NDEL1; RAC1;
ATF-2 transcription factor network	6	59	3.06122	3.2683	0.00968279	1	0.146826	0.594945	BCL2; BCL2L1; PRKCA; RB1; CCNA2; CUL3;
HIF-1-alpha transcription factor network	1	66	0.510204	0.491004	0.877589	1	1	1	RORA;
CDC42 signaling events	29	755	14.7959	1.23301	0.134354	1	0.910987	1	ATM; BCL2; BCL2L1; CDK1; CDK6; CEBPB; DLG1; EIF4EBP1; MYO9B; PRKCA; RAC1; RB1; TNIK; ARHGEF7; FGR; KRT19; VAV2; CCNA2; CUL3; ARHGEF15; KRT5; DAB2; KRT8; IL2RA; KPNA2; KRT14; CDK2; KRT1; RORA;
Signaling events mediated by Hepatocyte Growth Factor Receptor (c-Met)	55	1290	28.0612	1.36843	0.00634943	1	0.11388	0.461446	ABCC1; ASAP2; ATM; BCL2; BCL2L1; CBLL1; CCNK; CD82; CDK1; CDK6; CEBPB; CHEK1; DDX18; DLG1; EIF4EBP1; FBXW11; HDAC3; MMP14; PRKCA; RAC1; RB1; TNIK; USP8; VAMP3; ZFP36L1; ARHGEF7; FGR; KRT19; LRP1; VAV2; BMI1; CCNA2; CSNK1G1; CUL3; DGCR8; NBN; PTPRJ; S100A2; FCGR2B; KRT5; DAB2; KRT8; IL2RA; JUP; KPNA2; ALOX15; ELANE; KRT14; CDK2; KRT1; PCNA; SSH1; THY1; RORA; ITGAM;
Glypican 1 network	55	1296	28.0612	1.36209	0.00700373	1	0.120435	0.488007	ABCC1; ASAP2; ATM; BCL2; BCL2L1; CBLL1; CCNK; CD82; CDK1; CDK6; CEBPB; CHEK1; DDX18; DLG1; EIF4EBP1; FBXW11; HDAC3; MMP14; PRKCA; RAC1; RB1; TNIK; USP8; VAMP3; ZFP36L1; ARHGEF7; FGR; KRT19; LRP1; VAV2; BMI1; CCNA2; CSNK1G1; CUL3; DGCR8; NBN; PTPRJ; S100A2; FCGR2B; KRT5; DAB2; KRT8; IL2RA; JUP; KPNA2; ALOX15; ELANE; KRT14; CDK2; KRT1; PCNA; SSH1; THY1; RORA; ITGAM;
Validated targets of C-MYC transcriptional activation	3	81	1.53061	1.19234	0.465273	1	1	1	DDX18; BMI1; NBN;
N-cadherin signaling events	8	251	4.08163	1.02403	0.526018	1	1	1	CBLL1; CDK6; RAC1; TNIK; LRP5; JUP; KRT1; SSH1;
Fc-epsilon receptor I signaling in mast cells	1	61	0.510204	0.531243	0.856362	1	1	1	FCGR2B;
PDGF receptor signaling network	55	1290	28.0612	1.36843	0.00634943	1	0.11388	0.461446	ABCC1; ASAP2; ATM; BCL2; BCL2L1; CBLL1; CCNK; CD82; CDK1; CDK6; CEBPB; CHEK1; DDX18; DLG1; EIF4EBP1; FBXW11; HDAC3; MMP14; PRKCA; RAC1; RB1; TNIK; USP8; VAMP3; ZFP36L1; ARHGEF7; FGR; KRT19; LRP1; VAV2; BMI1; CCNA2; CSNK1G1; CUL3; DGCR8; NBN; PTPRJ; S100A2; FCGR2B; KRT5; DAB2; KRT8; IL2RA; JUP; KPNA2; ALOX15; ELANE; KRT14; CDK2; KRT1; PCNA; SSH1; THY1; RORA; ITGAM;
EphrinB-EPHB pathway	3	60	1.53061	1.60959	0.28729	1	1	1	RAC1; RGS3; FGR;
Integrin family cell surface interactions	58	1375	29.5918	1.35385	0.00621833	1	0.11388	0.461446	ABCC1; ASAP2; ATM; BCL2; BCL2L1; CBLL1; CCNK; CD82; CDK1; CDK6; CEBPB; CHEK1; DDX18; DLG1; EIF4EBP1; FBXW11; HDAC3; MMP14; PRKCA; RAC1; RB1; TNIK; USP8; VAMP3; ZFP36L1; ARHGEF7; FGR; KRT19; LRP1; MYH2; VAV2; BMI1; CCNA2; CSNK1G1; CUL3; DGCR8; NBN; PTPRJ; S100A2; FCGR2B; KRT5; DAB2; KRT8; IL2RA; JUP; KPNA2; F13A1; ALOX15; ELANE; KRT14; CDK2; KRT1; PCNA; SSH1; THY1; RORA; CD14; ITGAM;
IL1-mediated signaling events	13	234	6.63265	1.78409	0.0304324	1	0.360792	1	ATM; BCL2; BCL2L1; CEBPB; EIF4EBP1; PRKCA; RAC1; FGR; KRT19; KRT8; IL2RA; KPNA2; IL1B;
Caspase cascade in apoptosis	3	52	1.53061	1.85717	0.219864	1	1	1	BCL2; CASP2; KRT18;
Calcineurin-regulated NFAT-dependent transcription in lymphocytes	1	49	0.510204	0.661317	0.789276	1	1	1	IL2RA;
S1P2 pathway	1	26	0.510204	1.2461	0.561648	1	1	1	RAC1;
BARD1 signaling events	5	29	2.55102	5.54196	0.00180164	1	0.0653291	0.264715	ATM; FANCD2; NBN; CDK2; PCNA;
Coregulation of Androgen receptor activity	1	61	0.510204	0.531243	0.856362	1	1	1	CDK6;
Regulation of Telomerase	3	68	1.53061	1.42026	0.356094	1	1	1	ATM; RAD9A; NBN;
Cellular roles of Anthrax toxin	1	22	0.510204	1.47256	0.502234	1	1	1	IL1B;
Internalization of ErbB1	55	1285	28.0612	1.37375	0.00584504	1	0.11388	0.461446	ABCC1; ASAP2; ATM; BCL2; BCL2L1; CBLL1; CCNK; CD82; CDK1; CDK6; CEBPB; CHEK1; DDX18; DLG1; EIF4EBP1; FBXW11; HDAC3; MMP14; PRKCA; RAC1; RB1; TNIK; USP8; VAMP3; ZFP36L1; ARHGEF7; FGR; KRT19; LRP1; VAV2; BMI1; CCNA2; CSNK1G1; CUL3; DGCR8; NBN; PTPRJ; S100A2; FCGR2B; KRT5; DAB2; KRT8; IL2RA; JUP; KPNA2; ALOX15; ELANE; KRT14; CDK2; KRT1; PCNA; SSH1; THY1; RORA; ITGAM;
TGF-beta receptor signaling	14	305	7.14286	1.474	0.093331	1	0.707619	1	ATM; BCL2; BCL2L1; CEBPB; EIF4EBP1; PRKCA; RAC1; FGR; KRT19; DAB2; KRT8; IL2RA; KPNA2; CDK2;
FOXA2 and FOXA3 transcription factor networks	4	43	2.04082	2.99191	0.0438316	1	0.474747	1	CEBPB; CPT1A; ALB; HMGCS1;
Posttranslational regulation of adherens junction stability and dissassembly	7	231	3.57143	0.973779	0.585328	1	1	1	CBLL1; CDK6; RAC1; TNIK; JUP; KRT1; SSH1;
BCR signaling pathway	3	67	1.53061	1.44145	0.3475	1	1	1	RAC1; VAV2; FCGR2B;
Signaling events mediated by TCPTP	5	92	2.55102	1.74733	0.158581	1	0.990683	1	BCL2L1; CEBPB; KPNA2; ALOX15; THY1;
Signaling events mediated by VEGFR1 and VEGFR2	55	1293	28.0612	1.36525	0.00666969	1	0.115886	0.469573	ABCC1; ASAP2; ATM; BCL2; BCL2L1; CBLL1; CCNK; CD82; CDK1; CDK6; CEBPB; CHEK1; DDX18; DLG1; EIF4EBP1; FBXW11; HDAC3; MMP14; PRKCA; RAC1; RB1; TNIK; USP8; VAMP3; ZFP36L1; ARHGEF7; FGR; KRT19; LRP1; VAV2; BMI1; CCNA2; CSNK1G1; CUL3; DGCR8; NBN; PTPRJ; S100A2; FCGR2B; KRT5; DAB2; KRT8; IL2RA; JUP; KPNA2; ALOX15; ELANE; KRT14; CDK2; KRT1; PCNA; SSH1; THY1; RORA; ITGAM;
Beta1 integrin cell surface interactions	58	1348	29.5918	1.38097	0.00397644	1	0.11388	0.461446	ABCC1; ASAP2; ATM; BCL2; BCL2L1; CBLL1; CCNK; CD82; CDK1; CDK6; CEBPB; CHEK1; DDX18; DLG1; EIF4EBP1; FBXW11; HDAC3; MMP14; PRKCA; RAC1; RB1; TNIK; USP8; VAMP3; ZFP36L1; ARHGEF7; FGR; KRT19; LRP1; MYH2; VAV2; BMI1; CCNA2; CSNK1G1; CUL3; DGCR8; NBN; PTPRJ; S100A2; FCGR2B; KRT5; DAB2; KRT8; IL2RA; JUP; KPNA2; F13A1; ALOX15; ELANE; KRT14; CDK2; KRT1; PCNA; SSH1; THY1; RORA; CD14; ITGAM;
Thromboxane A2 receptor signaling	3	54	1.53061	1.7884	0.236448	1	1	1	PRKCA; RAC1; FGR;
Urokinase-type plasminogen activator (uPA) and uPAR-mediated signaling	55	1285	28.0612	1.37375	0.00584504	1	0.11388	0.461446	ABCC1; ASAP2; ATM; BCL2; BCL2L1; CBLL1; CCNK; CD82; CDK1; CDK6; CEBPB; CHEK1; DDX18; DLG1; EIF4EBP1; FBXW11; HDAC3; MMP14; PRKCA; RAC1; RB1; TNIK; USP8; VAMP3; ZFP36L1; ARHGEF7; FGR; KRT19; LRP1; VAV2; BMI1; CCNA2; CSNK1G1; CUL3; DGCR8; NBN; PTPRJ; S100A2; FCGR2B; KRT5; DAB2; KRT8; IL2RA; JUP; KPNA2; ALOX15; ELANE; KRT14; CDK2; KRT1; PCNA; SSH1; THY1; RORA; ITGAM;
Ras signaling in the CD4+ TCR pathway	2	42	1.02041	1.53538	0.378323	1	1	1	PRKCA; IL2RA;
TCR signaling in na&#xef;ve CD8+ T cells	3	127	1.53061	0.760504	0.763172	1	1	1	ATM; PRKCA; IL2RA;
Ceramide signaling pathway	3	49	1.53061	1.97086	0.195483	1	1	1	BCL2; RB1; ASAH1;
Signaling mediated by p38-alpha and p38-beta	4	50	2.04082	2.57312	0.0693212	1	0.59602	1	CEBPB; EIF4EBP1; KRT19; KRT8;
Signaling by Aurora kinases	9	98	4.59184	2.95004	0.00330641	1	0.10606	0.429756	ATM; AURKB; DES; KIF23; NDEL1; PRKCA; SMC2; ARHGEF7; CUL3;
S1P3 pathway	1	29	0.510204	1.11724	0.601528	1	1	1	RAC1;
Validated nuclear estrogen receptor alpha network	3	64	1.53061	1.50901	0.321673	1	1	1	CD82; CEBPB; PCNA;
Polo-like kinase signaling events in the cell cycle	8	109	4.08163	2.35798	0.0199873	1	0.254494	1	ATM; AURKB; BORA; CDK1; FBXW11; NDEL1; PRKCA; ARHGEF7;
IFN-gamma pathway	56	1293	28.5714	1.39007	0.00412459	1	0.11388	0.461446	ABCC1; ASAP2; ATM; BCL2; BCL2L1; CBLL1; CCNK; CD82; CDK1; CDK6; CEBPB; CHEK1; DDX18; DLG1; EIF4EBP1; FBXW11; HDAC3; MMP14; PRKCA; RAC1; RB1; TNIK; USP8; VAMP3; ZFP36L1; ARHGEF7; FGR; KRT19; LRP1; VAV2; BMI1; CCNA2; CSNK1G1; CUL3; DGCR8; NBN; PTPRJ; S100A2; FCGR2B; KRT5; DAB2; KRT8; IL2RA; JUP; KPNA2; ALOX15; ELANE; KRT14; CDK2; KRT1; PCNA; IL1B; SSH1; THY1; RORA; ITGAM;
Regulation of RAC1 activity	11	205	5.61224	1.7234	0.0547279	1	0.557383	1	BCL2; BCL2L1; MYO9B; PRKCA; RAC1; RB1; ARHGEF7; VAV2; CCNA2; CUL3; ARHGEF15;
PAR1-mediated thrombin signaling events	56	1296	28.5714	1.38685	0.0043433	1	0.11388	0.461446	ABCC1; ASAP2; ATM; BCL2; BCL2L1; CBLL1; CCNK; CD82; CDK1; CDK6; CEBPB; CHEK1; DDX18; DLG1; EIF4EBP1; FBXW11; HDAC3; MMP14; PLCB3; PRKCA; RAC1; RB1; TNIK; USP8; VAMP3; ZFP36L1; ARHGEF7; FGR; KRT19; LRP1; VAV2; BMI1; CCNA2; CSNK1G1; CUL3; DGCR8; NBN; PTPRJ; S100A2; FCGR2B; KRT5; DAB2; KRT8; IL2RA; JUP; KPNA2; ALOX15; ELANE; KRT14; CDK2; KRT1; PCNA; SSH1; THY1; RORA; ITGAM;
IL12 signaling mediated by STAT4	1	29	0.510204	1.11724	0.601528	1	1	1	IL2RA;
Beta3 integrin cell surface interactions	1	43	0.510204	0.753572	0.74484	1	1	1	THY1;
Noncanonical Wnt signaling pathway	6	182	3.06122	1.05963	0.503576	1	1	1	CDK6; RAC1; TNIK; CSNK1G1; CUL3; KRT1;
Regulation of p38-alpha and p38-beta	11	164	5.61224	2.15422	0.0130939	1	0.190193	0.770667	BCL2; BCL2L1; CEBPB; EIF4EBP1; PRKCA; RAC1; FGR; KRT19; KRT8; IL2RA; KPNA2;
Alpha4 beta1 integrin signaling events	3	33	1.53061	2.92613	0.0821395	1	0.67492	1	RAC1; MYH2; CD14;
VEGFR1 specific signals	1	29	0.510204	1.11724	0.601528	1	1	1	PRKCA;
PDGFR-beta signaling pathway	55	1285	28.0612	1.37375	0.00584504	1	0.11388	0.461446	ABCC1; ASAP2; ATM; BCL2; BCL2L1; CBLL1; CCNK; CD82; CDK1; CDK6; CEBPB; CHEK1; DDX18; DLG1; EIF4EBP1; FBXW11; HDAC3; MMP14; PRKCA; RAC1; RB1; TNIK; USP8; VAMP3; ZFP36L1; ARHGEF7; FGR; KRT19; LRP1; VAV2; BMI1; CCNA2; CSNK1G1; CUL3; DGCR8; NBN; PTPRJ; S100A2; FCGR2B; KRT5; DAB2; KRT8; IL2RA; JUP; KPNA2; ALOX15; ELANE; KRT14; CDK2; KRT1; PCNA; SSH1; THY1; RORA; ITGAM;
p63 transcription factor network	8	105	4.08163	2.44779	0.0162869	1	0.217955	0.883161	ATM; NOC2L; ADA; S100A2; KRT5; KRT14; TOP2A; FASN;
Canonical Wnt signaling pathway	5	155	2.55102	1.03717	0.533386	1	1	1	CDK6; TNIK; CSNK1G1; CUL3; KRT1;
HIF-2-alpha transcription factor network	1	34	0.510204	0.952989	0.660131	1	1	1	MMP14;
E-cadherin signaling in the nascent adherens junction	9	275	4.59184	1.05136	0.489287	1	1	1	CBLL1; CDK6; DLG1; RAC1; TNIK; VAV2; JUP; KRT1; SSH1;
EPHB forward signaling	1	40	0.510204	0.810076	0.719242	1	1	1	RAC1;
Integrin-linked kinase signaling	26	654	13.2653	1.27623	0.113874	1	0.816589	1	ATM; BCL2; BCL2L1; CDK1; CDK6; CEBPB; EIF4EBP1; LIMS1; PRKCA; RAC1; RB1; TNIK; ARHGEF7; FGR; KRT19; CCNA2; CUL3; KRT5; DAB2; KRT8; IL2RA; KPNA2; KRT14; CDK2; KRT1; RORA;
Regulation of nuclear beta catenin signaling and target gene transcription	3	135	1.53061	0.715441	0.79835	1	1	1	CDK6; TNIK; KRT1;
Ephrin B reverse signaling	3	30	1.53061	3.21865	0.0653438	1	0.588493	1	RAC1; RGS3; FGR;
p38 MAPK signaling pathway	12	189	6.12245	2.03907	0.0146287	1	0.201658	0.817124	ATM; BCL2; BCL2L1; CEBPB; EIF4EBP1; PRKCA; RAC1; FGR; KRT19; KRT8; IL2RA; KPNA2;
EGF receptor (ErbB1) signaling pathway	55	1285	28.0612	1.37375	0.00584504	1	0.11388	0.461446	ABCC1; ASAP2; ATM; BCL2; BCL2L1; CBLL1; CCNK; CD82; CDK1; CDK6; CEBPB; CHEK1; DDX18; DLG1; EIF4EBP1; FBXW11; HDAC3; MMP14; PRKCA; RAC1; RB1; TNIK; USP8; VAMP3; ZFP36L1; ARHGEF7; FGR; KRT19; LRP1; VAV2; BMI1; CCNA2; CSNK1G1; CUL3; DGCR8; NBN; PTPRJ; S100A2; FCGR2B; KRT5; DAB2; KRT8; IL2RA; JUP; KPNA2; ALOX15; ELANE; KRT14; CDK2; KRT1; PCNA; SSH1; THY1; RORA; ITGAM;
p75(NTR)-mediated signaling	3	178	1.53061	0.542619	0.92075	1	1	1	ATM; PRKCA; RAC1;
Thrombin/protease-activated receptor (PAR) pathway	56	1297	28.5714	1.38578	0.00441842	1	0.11388	0.461446	ABCC1; ASAP2; ATM; BCL2; BCL2L1; CBLL1; CCNK; CD82; CDK1; CDK6; CEBPB; CHEK1; DDX18; DLG1; EIF4EBP1; FBXW11; HDAC3; MMP14; PLCB3; PRKCA; RAC1; RB1; TNIK; USP8; VAMP3; ZFP36L1; ARHGEF7; FGR; KRT19; LRP1; VAV2; BMI1; CCNA2; CSNK1G1; CUL3; DGCR8; NBN; PTPRJ; S100A2; FCGR2B; KRT5; DAB2; KRT8; IL2RA; JUP; KPNA2; ALOX15; ELANE; KRT14; CDK2; KRT1; PCNA; SSH1; THY1; RORA; ITGAM;
Class I PI3K signaling events	55	1285	28.0612	1.37375	0.00584504	1	0.11388	0.461446	ABCC1; ASAP2; ATM; BCL2; BCL2L1; CBLL1; CCNK; CD82; CDK1; CDK6; CEBPB; CHEK1; DDX18; DLG1; EIF4EBP1; FBXW11; HDAC3; MMP14; PRKCA; RAC1; RB1; TNIK; USP8; VAMP3; ZFP36L1; ARHGEF7; FGR; KRT19; LRP1; VAV2; BMI1; CCNA2; CSNK1G1; CUL3; DGCR8; NBN; PTPRJ; S100A2; FCGR2B; KRT5; DAB2; KRT8; IL2RA; JUP; KPNA2; ALOX15; ELANE; KRT14; CDK2; KRT1; PCNA; SSH1; THY1; RORA; ITGAM;
Arf6 signaling events	55	1285	28.0612	1.37375	0.00584504	1	0.11388	0.461446	ABCC1; ASAP2; ATM; BCL2; BCL2L1; CBLL1; CCNK; CD82; CDK1; CDK6; CEBPB; CHEK1; DDX18; DLG1; EIF4EBP1; FBXW11; HDAC3; MMP14; PRKCA; RAC1; RB1; TNIK; USP8; VAMP3; ZFP36L1; ARHGEF7; FGR; KRT19; LRP1; VAV2; BMI1; CCNA2; CSNK1G1; CUL3; DGCR8; NBN; PTPRJ; S100A2; FCGR2B; KRT5; DAB2; KRT8; IL2RA; JUP; KPNA2; ALOX15; ELANE; KRT14; CDK2; KRT1; PCNA; SSH1; THY1; RORA; ITGAM;
EPO signaling pathway	3	34	1.53061	2.8401	0.0881125	1	0.696509	1	BCL2; BCL2L1; VAV2;
Plasma membrane estrogen receptor signaling	56	1298	28.5714	1.38472	0.00449466	1	0.11388	0.461446	ABCC1; ASAP2; ATM; BCL2; BCL2L1; CBLL1; CCNK; CD82; CDK1; CDK6; CEBPB; CHEK1; DDX18; DLG1; EIF4EBP1; FBXW11; HDAC3; MMP14; PLCB3; PRKCA; RAC1; RB1; TNIK; USP8; VAMP3; ZFP36L1; ARHGEF7; FGR; KRT19; LRP1; VAV2; BMI1; CCNA2; CSNK1G1; CUL3; DGCR8; NBN; PTPRJ; S100A2; FCGR2B; KRT5; DAB2; KRT8; IL2RA; JUP; KPNA2; ALOX15; ELANE; KRT14; CDK2; KRT1; PCNA; SSH1; THY1; RORA; ITGAM;
FoxO family signaling	2	49	1.02041	1.31609	0.454544	1	1	1	CSNK1G1; CDK2;
IL2-mediated signaling events	9	115	4.59184	2.51398	0.00940004	1	0.143846	0.58287	ATM; BCL2; BCL2L1; CDK6; PRKCA; RAC1; CCNA2; IL2RA; CDK2;
FAS (CD95) signaling pathway	7	130	3.57143	1.73027	0.110527	1	0.808594	1	ATM; BCL2; CASP2; PRKCA; RB1; KRT18; ASAH1;
C-MYB transcription factor network	8	84	4.08163	3.05967	0.00442342	1	0.11388	0.461446	BCL2; CDK6; CEBPB; ADA; PRTN3; MCM4; ELANE; CA1;
p73 transcription factor network	9	78	4.59184	3.70636	0.000654153	1	0.0291288	0.118031	CDK1; CDK6; CHEK1; RB1; ADA; CCNA2; S100A2; CDK2; FASN;
FOXM1 transcription factor network	5	42	2.55102	3.827	0.00930933	1	0.143777	0.58259	AURKB; CDK1; RB1; CCNA2; CDK2;
IL3-mediated signaling events	55	1292	28.0612	1.36631	0.00656143	1	0.115205	0.466814	ABCC1; ASAP2; ATM; BCL2; BCL2L1; CBLL1; CCNK; CD82; CDK1; CDK6; CEBPB; CHEK1; DDX18; DLG1; EIF4EBP1; FBXW11; HDAC3; MMP14; PRKCA; RAC1; RB1; TNIK; USP8; VAMP3; ZFP36L1; ARHGEF7; FGR; KRT19; LRP1; VAV2; BMI1; CCNA2; CSNK1G1; CUL3; DGCR8; NBN; PTPRJ; S100A2; FCGR2B; KRT5; DAB2; KRT8; IL2RA; JUP; KPNA2; ALOX15; ELANE; KRT14; CDK2; KRT1; PCNA; SSH1; THY1; RORA; ITGAM;
AP-1 transcription factor network	24	621	12.2449	1.2407	0.156182	1	0.979369	1	ATM; BCL2; BCL2L1; CDK1; CDK6; CEBPB; EIF4EBP1; PRKCA; RAC1; RB1; TNIK; FGR; KRT19; CCNA2; CUL3; KRT5; DAB2; KRT8; IL2RA; KPNA2; KRT14; CDK2; KRT1; RORA;
Signaling events regulated by Ret tyrosine kinase	3	69	1.53061	1.39968	0.364673	1	1	1	ATM; PRKCA; RAC1;
Hypoxic and oxygen homeostasis regulation of HIF-1-alpha	1	80	0.510204	0.405089	0.921825	1	1	1	RORA;
amb2 Integrin signaling	5	40	2.55102	4.0183	0.00757043	1	0.12664	0.51315	FGR; LRP1; MYH2; THY1; ITGAM;
Glucocorticoid receptor signaling	2	85	1.02041	0.758751	0.748823	1	1	1	KRT5; KRT14;
Hedgehog signaling events mediated by Gli proteins	3	48	1.53061	2.01191	0.187512	1	1	1	FBXW11; CSNK1G1; LGALS3;
mTOR signaling pathway	55	1285	28.0612	1.37375	0.00584504	1	0.11388	0.461446	ABCC1; ASAP2; ATM; BCL2; BCL2L1; CBLL1; CCNK; CD82; CDK1; CDK6; CEBPB; CHEK1; DDX18; DLG1; EIF4EBP1; FBXW11; HDAC3; MMP14; PRKCA; RAC1; RB1; TNIK; USP8; VAMP3; ZFP36L1; ARHGEF7; FGR; KRT19; LRP1; VAV2; BMI1; CCNA2; CSNK1G1; CUL3; DGCR8; NBN; PTPRJ; S100A2; FCGR2B; KRT5; DAB2; KRT8; IL2RA; JUP; KPNA2; ALOX15; ELANE; KRT14; CDK2; KRT1; PCNA; SSH1; THY1; RORA; ITGAM;
RAC1 signaling pathway	11	205	5.61224	1.7234	0.0547279	1	0.557383	1	BCL2; BCL2L1; MYO9B; PRKCA; RAC1; RB1; ARHGEF7; VAV2; CCNA2; CUL3; ARHGEF15;
ErbB receptor signaling network	55	1308	28.0612	1.3496	0.00848714	1	0.134824	0.546312	ABCC1; ASAP2; ATM; BCL2; BCL2L1; CBLL1; CCNK; CD82; CDK1; CDK6; CEBPB; CHEK1; DDX18; DLG1; EIF4EBP1; FBXW11; HDAC3; MMP14; PRKCA; RAC1; RB1; TNIK; USP8; VAMP3; ZFP36L1; ARHGEF7; FGR; KRT19; LRP1; VAV2; BMI1; CCNA2; CSNK1G1; CUL3; DGCR8; NBN; PTPRJ; S100A2; FCGR2B; KRT5; DAB2; KRT8; IL2RA; JUP; KPNA2; ALOX15; ELANE; KRT14; CDK2; KRT1; PCNA; SSH1; THY1; RORA; ITGAM;
Signaling events mediated by focal adhesion kinase	55	1285	28.0612	1.37375	0.00584504	1	0.11388	0.461446	ABCC1; ASAP2; ATM; BCL2; BCL2L1; CBLL1; CCNK; CD82; CDK1; CDK6; CEBPB; CHEK1; DDX18; DLG1; EIF4EBP1; FBXW11; HDAC3; MMP14; PRKCA; RAC1; RB1; TNIK; USP8; VAMP3; ZFP36L1; ARHGEF7; FGR; KRT19; LRP1; VAV2; BMI1; CCNA2; CSNK1G1; CUL3; DGCR8; NBN; PTPRJ; S100A2; FCGR2B; KRT5; DAB2; KRT8; IL2RA; JUP; KPNA2; ALOX15; ELANE; KRT14; CDK2; KRT1; PCNA; SSH1; THY1; RORA; ITGAM;
VEGF and VEGFR signaling network	55	1301	28.0612	1.35686	0.00759234	1	0.12664	0.51315	ABCC1; ASAP2; ATM; BCL2; BCL2L1; CBLL1; CCNK; CD82; CDK1; CDK6; CEBPB; CHEK1; DDX18; DLG1; EIF4EBP1; FBXW11; HDAC3; MMP14; PRKCA; RAC1; RB1; TNIK; USP8; VAMP3; ZFP36L1; ARHGEF7; FGR; KRT19; LRP1; VAV2; BMI1; CCNA2; CSNK1G1; CUL3; DGCR8; NBN; PTPRJ; S100A2; FCGR2B; KRT5; DAB2; KRT8; IL2RA; JUP; KPNA2; ALOX15; ELANE; KRT14; CDK2; KRT1; PCNA; SSH1; THY1; RORA; ITGAM;
Glucocorticoid receptor regulatory network	2	80	1.02041	0.806167	0.718038	1	1	1	KRT5; KRT14;
Alpha9 beta1 integrin signaling events	56	1302	28.5714	1.38046	0.00481117	1	0.11388	0.461446	ABCC1; ASAP2; ATM; BCL2; BCL2L1; CBLL1; CCNK; CD82; CDK1; CDK6; CEBPB; CHEK1; DDX18; DLG1; EIF4EBP1; FBXW11; HDAC3; MMP14; PRKCA; RAC1; RB1; TNIK; USP8; VAMP3; ZFP36L1; ARHGEF7; FGR; KRT19; LRP1; VAV2; BMI1; CCNA2; CSNK1G1; CUL3; DGCR8; NBN; PTPRJ; S100A2; FCGR2B; KRT5; DAB2; KRT8; IL2RA; JUP; KPNA2; F13A1; ALOX15; ELANE; KRT14; CDK2; KRT1; PCNA; SSH1; THY1; RORA; ITGAM;
IL8- and CXCR1-mediated signaling events	3	28	1.53061	3.44847	0.0551368	1	0.557383	1	PLCB3; PRKCA; FGR;
Syndecan-2-mediated signaling events	1	77	0.510204	0.420869	0.913933	1	1	1	SSH1;
Signaling events mediated by Stem cell factor receptor (c-Kit)	1	52	0.510204	0.623172	0.808516	1	1	1	BCL2;
ALK1 pathway	15	324	7.65306	1.4866	0.0796935	1	0.661337	1	ATM; BCL2; BCL2L1; CEBPB; EIF4EBP1; PRKCA; RAC1; FGR; KRT19; TGFB3; DAB2; KRT8; IL2RA; KPNA2; CDK2;
Arf6 downstream pathway	55	1285	28.0612	1.37375	0.00584504	1	0.11388	0.461446	ABCC1; ASAP2; ATM; BCL2; BCL2L1; CBLL1; CCNK; CD82; CDK1; CDK6; CEBPB; CHEK1; DDX18; DLG1; EIF4EBP1; FBXW11; HDAC3; MMP14; PRKCA; RAC1; RB1; TNIK; USP8; VAMP3; ZFP36L1; ARHGEF7; FGR; KRT19; LRP1; VAV2; BMI1; CCNA2; CSNK1G1; CUL3; DGCR8; NBN; PTPRJ; S100A2; FCGR2B; KRT5; DAB2; KRT8; IL2RA; JUP; KPNA2; ALOX15; ELANE; KRT14; CDK2; KRT1; PCNA; SSH1; THY1; RORA; ITGAM;
JNK signaling in the CD4+ TCR pathway	1	42	0.510204	0.77151	0.736576	1	1	1	IL2RA;
Role of Calcineurin-dependent NFAT signaling in lymphocytes	5	95	2.55102	1.69216	0.173976	1	1	1	BCL2; BCL2L1; PRKCA; IL2RA; KPNA2;
IL4-mediated signaling events	4	62	2.04082	2.07518	0.126884	1	0.863844	1	BCL2L1; CEBPB; ALOX15; THY1;
HIV-1 Nef: Negative effector of Fas and TNF-alpha	2	35	1.02041	1.84237	0.298097	1	1	1	BCL2; CASP2;
Signaling events mediated by PTP1B	2	52	1.02041	1.24017	0.485563	1	1	1	FGR; YBX1;
Validated transcriptional targets of AP1 family members Fra1 and Fra2	3	134	1.53061	0.720779	0.794203	1	1	1	PRKCA; CCNA2; IL2RA;
CXCR4-mediated signaling events	7	190	3.57143	1.1839	0.380423	1	1	1	ATM; PLCB3; PRKCA; RAC1; FGR; IL2RA; SSH1;
S1P1 pathway	55	1285	28.0612	1.37375	0.00584504	1	0.11388	0.461446	ABCC1; ASAP2; ATM; BCL2; BCL2L1; CBLL1; CCNK; CD82; CDK1; CDK6; CEBPB; CHEK1; DDX18; DLG1; EIF4EBP1; FBXW11; HDAC3; MMP14; PRKCA; RAC1; RB1; TNIK; USP8; VAMP3; ZFP36L1; ARHGEF7; FGR; KRT19; LRP1; VAV2; BMI1; CCNA2; CSNK1G1; CUL3; DGCR8; NBN; PTPRJ; S100A2; FCGR2B; KRT5; DAB2; KRT8; IL2RA; JUP; KPNA2; ALOX15; ELANE; KRT14; CDK2; KRT1; PCNA; SSH1; THY1; RORA; ITGAM;
FOXA1 transcription factor network	1	44	0.510204	0.73645	0.752845	1	1	1	CEBPB;
Alpha-synuclein signaling	1	33	0.510204	0.981859	0.649141	1	1	1	FGR;
Netrin-mediated signaling events	1	32	0.510204	1.01253	0.637797	1	1	1	RAC1;
EPHA2 forward signaling	2	19	1.02041	3.39302	0.116895	1	0.816589	1	RAC1; VAV2;
TNF receptor signaling pathway	17	299	8.67347	1.82554	0.0115845	1	0.171	0.692895	ATM; BCL2; BCL2L1; CASP2; CEBPB; EIF4EBP1; PRKCA; RAC1; RB1; TNIK; FGR; KRT19; KRT18; KRT8; IL2RA; KPNA2; ASAH1;
p53 pathway	13	189	6.63265	2.20885	0.00589485	1	0.11388	0.461446	ATM; BCL2; BCL2L1; CCNK; CD82; CHEK1; RB1; CCNA2; CSNK1G1; DGCR8; S100A2; CDK2; PCNA;
ErbB1 downstream signaling	55	1285	28.0612	1.37375	0.00584504	1	0.11388	0.461446	ABCC1; ASAP2; ATM; BCL2; BCL2L1; CBLL1; CCNK; CD82; CDK1; CDK6; CEBPB; CHEK1; DDX18; DLG1; EIF4EBP1; FBXW11; HDAC3; MMP14; PRKCA; RAC1; RB1; TNIK; USP8; VAMP3; ZFP36L1; ARHGEF7; FGR; KRT19; LRP1; VAV2; BMI1; CCNA2; CSNK1G1; CUL3; DGCR8; NBN; PTPRJ; S100A2; FCGR2B; KRT5; DAB2; KRT8; IL2RA; JUP; KPNA2; ALOX15; ELANE; KRT14; CDK2; KRT1; PCNA; SSH1; THY1; RORA; ITGAM;
EGFR-dependent Endothelin signaling events	55	1286	28.0612	1.37268	0.00594306	1	0.11388	0.461446	ABCC1; ASAP2; ATM; BCL2; BCL2L1; CBLL1; CCNK; CD82; CDK1; CDK6; CEBPB; CHEK1; DDX18; DLG1; EIF4EBP1; FBXW11; HDAC3; MMP14; PRKCA; RAC1; RB1; TNIK; USP8; VAMP3; ZFP36L1; ARHGEF7; FGR; KRT19; LRP1; VAV2; BMI1; CCNA2; CSNK1G1; CUL3; DGCR8; NBN; PTPRJ; S100A2; FCGR2B; KRT5; DAB2; KRT8; IL2RA; JUP; KPNA2; ALOX15; ELANE; KRT14; CDK2; KRT1; PCNA; SSH1; THY1; RORA; ITGAM;
Syndecan-4-mediated signaling events	7	209	3.57143	1.07628	0.478025	1	1	1	CDK6; PRKCA; RAC1; TNIK; CSNK1G1; CUL3; KRT1;
Nongenotropic Androgen signaling	1	26	0.510204	1.2461	0.561648	1	1	1	RAC1;
IL8-mediated signaling events	3	38	1.53061	2.54122	0.113719	1	0.816589	1	PLCB3; PRKCA; FGR;
RXR and RAR heterodimerization with other nuclear receptor	1	26	0.510204	1.2461	0.561648	1	1	1	BCL2;
Regulation of nuclear SMAD2/3 signaling	14	305	7.14286	1.474	0.093331	1	0.707619	1	ATM; BCL2; BCL2L1; CEBPB; EIF4EBP1; PRKCA; RAC1; FGR; KRT19; DAB2; KRT8; IL2RA; KPNA2; CDK2;
ALK1 signaling events	15	321	7.65306	1.5005	0.0749147	1	0.631099	1	ATM; BCL2; BCL2L1; CEBPB; EIF4EBP1; PRKCA; RAC1; FGR; KRT19; TGFB3; DAB2; KRT8; IL2RA; KPNA2; CDK2;
Angiopoietin receptor Tie2-mediated signaling	1	50	0.510204	0.648093	0.795894	1	1	1	RAC1;
Arf6 trafficking events	55	1285	28.0612	1.37375	0.00584504	1	0.11388	0.461446	ABCC1; ASAP2; ATM; BCL2; BCL2L1; CBLL1; CCNK; CD82; CDK1; CDK6; CEBPB; CHEK1; DDX18; DLG1; EIF4EBP1; FBXW11; HDAC3; MMP14; PRKCA; RAC1; RB1; TNIK; USP8; VAMP3; ZFP36L1; ARHGEF7; FGR; KRT19; LRP1; VAV2; BMI1; CCNA2; CSNK1G1; CUL3; DGCR8; NBN; PTPRJ; S100A2; FCGR2B; KRT5; DAB2; KRT8; IL2RA; JUP; KPNA2; ALOX15; ELANE; KRT14; CDK2; KRT1; PCNA; SSH1; THY1; RORA; ITGAM;
E-cadherin signaling events	9	280	4.59184	1.03258	0.511325	1	1	1	CBLL1; CDK6; DLG1; RAC1; TNIK; VAV2; JUP; KRT1; SSH1;
Androgen-mediated signaling	4	130	2.04082	0.989785	0.581705	1	1	1	CDK6; EHMT2; KAT7; RAC1;
Endothelins	56	1304	28.5714	1.37834	0.00497655	1	0.11388	0.461446	ABCC1; ASAP2; ATM; BCL2; BCL2L1; CBLL1; CCNK; CD82; CDK1; CDK6; CEBPB; CHEK1; DDX18; DLG1; EIF4EBP1; FBXW11; HDAC3; MMP14; PLCB3; PRKCA; RAC1; RB1; TNIK; USP8; VAMP3; ZFP36L1; ARHGEF7; FGR; KRT19; LRP1; VAV2; BMI1; CCNA2; CSNK1G1; CUL3; DGCR8; NBN; PTPRJ; S100A2; FCGR2B; KRT5; DAB2; KRT8; IL2RA; JUP; KPNA2; ALOX15; ELANE; KRT14; CDK2; KRT1; PCNA; SSH1; THY1; RORA; ITGAM;
Presenilin action in Notch and Wnt signaling	1	46	0.510204	0.704437	0.768115	1	1	1	FBXW11;
a6b1 and a6b4 Integrin signaling	2	35	1.02041	1.84237	0.298097	1	1	1	PRKCA; RAC1;
Regulation of retinoblastoma protein	6	66	3.06122	2.92171	0.0163336	1	0.217955	0.883161	CDK6; CEBPB; HDAC3; RB1; CCNA2; CDK2;
TCR signaling in na&#xef;ve CD4+ T cells	3	133	1.53061	0.726198	0.789986	1	1	1	ATM; PRKCA; IL2RA;
Notch signaling pathway	2	94	1.02041	0.686112	0.79701	1	1	1	RB1; GAA;
IL5-mediated signaling events	55	1289	28.0612	1.36949	0.00624566	1	0.11388	0.461446	ABCC1; ASAP2; ATM; BCL2; BCL2L1; CBLL1; CCNK; CD82; CDK1; CDK6; CEBPB; CHEK1; DDX18; DLG1; EIF4EBP1; FBXW11; HDAC3; MMP14; PRKCA; RAC1; RB1; TNIK; USP8; VAMP3; ZFP36L1; ARHGEF7; FGR; KRT19; LRP1; VAV2; BMI1; CCNA2; CSNK1G1; CUL3; DGCR8; NBN; PTPRJ; S100A2; FCGR2B; KRT5; DAB2; KRT8; IL2RA; JUP; KPNA2; ALOX15; ELANE; KRT14; CDK2; KRT1; PCNA; SSH1; THY1; RORA; ITGAM;
IL23-mediated signaling events	3	66	1.53061	1.46329	0.338896	1	1	1	ATM; PRKCA; IL1B;
Direct p53 effectors	8	138	4.08163	1.86249	0.0657524	1	0.588493	1	BCL2; BCL2L1; CCNK; CD82; RB1; DGCR8; S100A2; PCNA;
Retinoic acid receptors-mediated signaling	4	47	2.04082	2.73733	0.057624	1	0.568556	1	BCL2; CDK1; HDAC3; PRKCA;
E-cadherin signaling in keratinocytes	2	21	1.02041	3.07003	0.137975	1	0.927992	1	RAC1; JUP;
IL12-mediated signaling events	4	111	2.04082	1.15919	0.456867	1	1	1	ATM; PRKCA; IL2RA; IL1B;
IL2 signaling events mediated by PI3K	6	67	3.06122	2.87811	0.0174896	1	0.226145	0.916346	ATM; BCL2; BCL2L1; PRKCA; RAC1; IL2RA;
Sphingosine 1-phosphate (S1P) pathway	56	1308	28.5714	1.37413	0.00532215	1	0.11388	0.461446	ABCC1; ASAP2; ATM; BCL2; BCL2L1; CBLL1; CCNK; CD82; CDK1; CDK6; CEBPB; CHEK1; DDX18; DLG1; EIF4EBP1; FBXW11; HDAC3; MMP14; PRKCA; RAC1; RB1; TNIK; USP8; VAMP3; ZFP36L1; ARHGEF7; FGR; KRT19; LRP1; VAV2; BMI1; CCNA2; CSNK1G1; CUL3; DGCR8; NBN; PTPRJ; S100A2; FCGR2B; KRT5; DAB2; KRT8; IL2RA; JUP; KPNA2; ALOX15; ELANE; KRT14; CDK2; KRT1; PCNA; ASAH1; SSH1; THY1; RORA; ITGAM;
Regulation of Androgen receptor activity	3	108	1.53061	0.894284	0.660047	1	1	1	CDK6; EHMT2; KAT7;
Proteoglycan syndecan-mediated signaling events	55	1342	28.0612	1.3154	0.0142156	1	0.197597	0.800671	ABCC1; ASAP2; ATM; BCL2; BCL2L1; CBLL1; CCNK; CD82; CDK1; CDK6; CEBPB; CHEK1; DDX18; DLG1; EIF4EBP1; FBXW11; HDAC3; MMP14; PRKCA; RAC1; RB1; TNIK; USP8; VAMP3; ZFP36L1; ARHGEF7; FGR; KRT19; LRP1; VAV2; BMI1; CCNA2; CSNK1G1; CUL3; DGCR8; NBN; PTPRJ; S100A2; FCGR2B; KRT5; DAB2; KRT8; IL2RA; JUP; KPNA2; ALOX15; ELANE; KRT14; CDK2; KRT1; PCNA; SSH1; THY1; RORA; ITGAM;
Calcium signaling in the CD4+ TCR pathway	1	29	0.510204	1.11724	0.601528	1	1	1	IL2RA;
IL8- and CXCR2-mediated signaling events	3	34	1.53061	2.8401	0.0881125	1	0.696509	1	PLCB3; PRKCA; FGR;
BMP receptor signaling	12	226	6.12245	1.70525	0.0491524	1	0.522205	1	ATM; BCL2; BCL2L1; CEBPB; EIF4EBP1; PRKCA; RAC1; FGR; KRT19; KRT8; IL2RA; KPNA2;
Endogenous TLR signaling	3	57	1.53061	1.69429	0.261706	1	1	1	ATM; PRKCA; CD14;
Aurora A signaling	5	64	2.55102	2.51167	0.0483882	1	0.517382	1	ATM; AURKB; NDEL1; PRKCA; ARHGEF7;
RhoA signaling pathway	11	205	5.61224	1.7234	0.0547279	1	0.557383	1	BCL2; BCL2L1; MYO9B; PRKCA; RAC1; RB1; ARHGEF7; VAV2; CCNA2; CUL3; ARHGEF15;
Class I PI3K signaling events mediated by Akt	55	1285	28.0612	1.37375	0.00584504	1	0.11388	0.461446	ABCC1; ASAP2; ATM; BCL2; BCL2L1; CBLL1; CCNK; CD82; CDK1; CDK6; CEBPB; CHEK1; DDX18; DLG1; EIF4EBP1; FBXW11; HDAC3; MMP14; PRKCA; RAC1; RB1; TNIK; USP8; VAMP3; ZFP36L1; ARHGEF7; FGR; KRT19; LRP1; VAV2; BMI1; CCNA2; CSNK1G1; CUL3; DGCR8; NBN; PTPRJ; S100A2; FCGR2B; KRT5; DAB2; KRT8; IL2RA; JUP; KPNA2; ALOX15; ELANE; KRT14; CDK2; KRT1; PCNA; SSH1; THY1; RORA; ITGAM;
LKB1 signaling events	57	1305	29.0816	1.40188	0.00309139	1	0.101107	0.409687	ABCC1; ASAP2; ATM; BCL2; BCL2L1; CBLL1; CCNK; CD82; CDK1; CDK6; CEBPB; CHEK1; CRTC2; DDX18; DLG1; EIF4EBP1; FBXW11; HDAC3; MMP14; PRKCA; RAC1; RB1; TNIK; USP8; VAMP3; ZFP36L1; ARHGEF7; FGR; KRT19; LRP1; STRADA; VAV2; BMI1; CCNA2; CSNK1G1; CUL3; DGCR8; NBN; PTPRJ; S100A2; FCGR2B; KRT5; DAB2; KRT8; IL2RA; JUP; KPNA2; ALOX15; ELANE; KRT14; CDK2; KRT1; PCNA; SSH1; THY1; RORA; ITGAM;
Regulation of RhoA activity	11	205	5.61224	1.7234	0.0547279	1	0.557383	1	BCL2; BCL2L1; MYO9B; PRKCA; RAC1; RB1; ARHGEF7; VAV2; CCNA2; CUL3; ARHGEF15;
Signaling events mediated by PRL	3	23	1.53061	4.19781	0.0333551	1	0.383699	1	RAC1; CCNA2; CDK2;
AndrogenReceptor	3	78	1.53061	1.2382	0.440669	1	1	1	CDK1; KAT7; RB1;
Wnt	8	82	4.08163	3.13429	0.00381255	1	0.11388	0.461446	CDK1; DLG1; PRKCA; RAC1; LRP1; LRP5; DAB2; JUP;
KitReceptor	3	54	1.53061	1.7884	0.236448	1	1	1	PRKCA; FGR; VAV2;
Hedgehog	1	16	0.510204	2.02443	0.397771	1	1	1	CDK1;
Alpha6Beta4Integrin	3	48	1.53061	2.01191	0.187512	1	1	1	EIF4EBP1; PRKCA; RAC1;
TNF alpha/NF-kB	5	171	2.55102	0.940133	0.621528	1	1	1	CASP2; FANCD2; FBXW11; KPNA2; MCM5;
TGFBR	7	125	3.57143	1.79948	0.0946341	1	0.714252	1	ANAPC4; CDK1; CDK6; RB1; TGFB3; DAB2; CDK2;
ID	3	14	1.53061	6.89448	0.00841399	1	0.134824	0.546312	RB1; CCNA2; CDK2;
EGFR1	6	138	3.06122	1.39745	0.260115	1	1	1	CEBPB; PRKCA; RAC1; SHOC2; KRT18; KRT8;
Mesenchymal-to-epithelial transition	9	223	4.59184	1.2965	0.259488	1	1	1	DHCR24; KRT19; MYO5C; KRT18; KRT8; CTSH; JUP; TJP3; HNMT;
Epithelial-to-mesenchymal transition	7	185	3.57143	1.21589	0.354687	1	1	1	SOAT1; SYNE1; CEP170; AP1S2; F13A1; MRC1; SLC2A3;

## Sheet: Protein domain
Analysis: Protein domain
Dataset name: LysateBanLecp005
Number of genes in the dataset: 444
Number of genes in the dataset (which are available in Protein domain database) :322
Number of genes in background: 14847
Is analysis quantitative: No
						Corrected p-values
Protein domain	No. of genes in the dataset	No. of genes in the background dataset	Percentage of genes	Fold enrichment	P-value (Hypergeometric test)	Bonferroni method	BH method	Q-value (Storey-Tibshirani method)	genes mapped (from input data set)
Pept_C1	5	13	1.5528	17.7554	5.18935e-06	0.00503367	0.00503367	0.0286455	CTSZ; CTSH; CTSC; CTSB; CTSS;
MCM	4	9	1.24224	20.5206	2.51075e-05	0.0243543	0.0121771	0.0692974	MCM3; MCM4; MCM2; MCM5;
DUF4217	3	4	0.931677	34.6092	3.97819e-05	0.0385885	0.0128628	0.0731995	DDX10; DDX18; DDX31;
Alpha_L_fucos	2	2	0.621118	46.1073	0.000468935	0.454867	0.113717	0.647137	FUCA2; FUCA1;
coiled coil region	86	2968	26.7081	1.33614	0.00195217	1	0.270515	1	ANKHD1; BRI3BP; CAAP1; CENPH; CENPK; CHTF18; COG4; DDX10; DES; DHX29; EHMT2; FTSJ3; GBP6; GRIPAP1; ISY1; KIF23; KIF4A; MAN1A1; MAN2A1; MRPL47; MRPS26; MYO9B; NCAPD3; NDEL1; PEX14; PHF14; PLCB3; PRMT3; RANBP6; RPRD2; RSRC2; SDAD1; SMC2; SPC25; SRBD1; TBC1D2B; TIMELESS; TNIK; TTC4; USP8; VAMP3; VTI1A; WDHD1; ZMYND8; ZWINT; KRT6A; ARHGEF7; BLOC1S1; KLC4; KRT13; KRT19; MYH2; CCDC9; CEP170; CLPB; FNBP…
UBCc	1	42	0.310559	1.10851	0.602358	1	1	1	UBE2C;
signal peptide	70	3668	21.7391	0.880034	0.906818	1	1	1	ABCD3; BCKDHB; BRI3BP; CD82; CYP51A1; HLA-DRB1; KDM3B; LAG3; MIER1; MMP14; MRPL2; NDC1; PYCR1; RGS3; TEX264; TMUB1; VAMP7; ARSA; CST7; DSG1; FUCA2; GAA; GGH; LGMN; LRP1; PRTN3; CD226; CLPB; DPEP2; ICOS; ITIH2; PTPRJ; TGFB3; LRP5; ST6GALNAC2; FCGR2B; NAAA; ALB; CTSZ; IL2RA; AZU1; CTSH; ADAMTSL4; IFI30; RNASET2; FUCA1; RNASE6; ELANE; MSRA; HEXB; NPC2; CTSA; CTSC; CAMP; CTSB; CTSS; ASAH1; MRC1; PPT1…
transmembrane domain	68	4771	21.118	0.657252	0.999997	1	1	1	ABCB8; ABCC1; ABCD3; AUP1; BCL2; BCL2L1; BRI3BP; CCR4; CD69; CD82; CEND1; COX6A1; CYP51A1; DHCR24; EBP; FAM162A; FAR1; HIGD1A; HLA-DRB1; LAG3; LEMD2; LPGAT1; MAN1A1; MAN2A1; MMP14; NDC1; OXA1L; PEX14; SLC35E1; SOAT1; STX5; TEX264; TIMM22; TMEM41B; TMEM70; TMUB1; TRAT1; VAMP3; VAMP7; VTI1A; CPT1A; LRP1; MAVS; TMBIM1; BTNL2; CD226; CHST11; DHCR7; ELOVL1; ICOS; MFF; PLP2; PTPRJ; VWA9; LRP5; P2RY12; …
TPR	5	93	1.5528	2.48358	0.051637	1	1	1	TOMM34; TTC1; TTC4; IFIT1; KLC4;
WW	3	49	0.931677	2.83173	0.0898577	1	1	1	DGCR8; FNBP4; DRP2;
RhoGAP	1	65	0.310559	0.716326	0.760293	1	1	1	MYO9B;
IG	4	340	1.24224	0.543779	0.939818	1	1	1	LAG3; BTNL2; FCGR2B; THY1;
DSPc	2	28	0.621118	3.30866	0.122714	1	1	1	DUSP12; SSH1;
ZnF_U1	1	26	0.310559	1.7904	0.4348	1	1	1	RBM20;
ZnF_C2H2	7	799	2.17391	0.404516	0.998782	1	1	1	ARID2; CBLL1; KAT7; KLF13; PRMT3; RBM20; ZNF740;
CA	1	114	0.310559	0.408459	0.918674	1	1	1	DSG1;
TBC	1	50	0.310559	0.931181	0.666516	1	1	1	TBC1D2B;
EXOIII	1	13	0.310559	3.57943	0.248107	1	1	1	REXO4;
EFh	1	144	0.310559	0.323369	0.958118	1	1	1	MYL12B;
S_TKc	13	307	4.03727	1.95386	0.0168001	1	1	1	AURKB; CDK1; CDK12; CDK13; CDK6; CHEK1; CLK3; PRKCA; STK17A; TNIK; PBK; CDK2; STK38;
BRCT	1	22	0.310559	2.11578	0.382903	1	1	1	NBN;
ZnMc	1	29	0.310559	1.60525	0.470846	1	1	1	MMP14;
HX	1	23	0.310559	2.02383	0.396306	1	1	1	MMP14;
DEXDc	6	112	1.86335	2.47393	0.0351167	1	1	1	DDX10; DDX18; DDX19B; DDX31; DHX29; DHX36;
HELICc	6	111	1.86335	2.49622	0.033826	1	1	1	DDX10; DDX18; DDX19B; DDX31; DHX29; DHX36;
RRM	6	221	1.86335	1.25381	0.347061	1	1	1	CELF1; GRSF1; LARP4B; RBM20; SRSF12; RBM3;
Sema	1	30	0.310559	1.55176	0.482345	1	1	1	SEMA4A;
PSI	1	44	0.310559	1.05813	0.619467	1	1	1	SEMA4A;
RING	6	311	1.86335	0.890984	0.670681	1	1	1	CBLL1; DTX3L; BMI1; ZNRF2; MKRN3; UHRF1;
SH3	9	216	2.79503	1.92318	0.046244	1	1	1	ASAP2; DLG1; ARHGEF7; FGR; VAV2; NEDD9; TJP3; UBASH3B; SKAP2;
PTB	1	36	0.310559	1.29321	0.54629	1	1	1	DAB2;
CH	2	66	0.621118	1.40396	0.42089	1	1	1	ARHGEF7; VAV2;
SPEC	2	32	0.621118	2.89521	0.152413	1	1	1	DRP2; KRT77;
ZnF_ZZ	1	19	0.310559	2.44968	0.340886	1	1	1	DRP2;
LRR	1	233	0.310559	0.199856	0.994199	1	1	1	SHOC2;
LRR_TYP	1	132	0.310559	0.352764	0.945376	1	1	1	SHOC2;
IGc2	1	211	0.310559	0.220693	0.990533	1	1	1	CD226;
KH	2	40	0.621118	2.31631	0.215029	1	1	1	ANKHD1; FUBP1;
IG_like	2	128	0.621118	0.723972	0.769489	1	1	1	BTNL2; CD226;
ANK	4	249	1.24224	0.742501	0.792245	1	1	1	ANKHD1; ASAP2; EHMT2; CLPB;
FN3	1	187	0.310559	0.249015	0.98386	1	1	1	PTPRJ;
BTB	1	179	0.310559	0.260144	0.980723	1	1	1	IVNS1ABP;
SET	2	47	0.621118	1.9714	0.271414	1	1	1	EHMT2; EZH1;
ZnF_C4	1	46	0.310559	1.01214	0.635842	1	1	1	RORA;
HOLI	1	48	0.310559	0.969972	0.651515	1	1	1	RORA;
WD40	9	269	2.79503	1.54428	0.131836	1	1	1	CHAF1B; DCAF13; FBXW11; WDHD1; WDR73; WDR76; NUP37; WDR46; PAK1IP1;
RGS	1	35	0.310559	1.33014	0.536208	1	1	1	RGS3;
CSP	1	9	0.310559	5.16852	0.179132	1	1	1	YBX1;
EGF	2	208	0.621118	0.445535	0.942537	1	1	1	LRP1; LRP5;
EGF_like	1	87	0.310559	0.535207	0.852395	1	1	1	LRP1;
VIT	1	9	0.310559	5.16852	0.179132	1	1	1	ITIH2;
VWA	2	84	0.621118	1.10315	0.546945	1	1	1	ITIH2; ITGAM;
SANT	2	49	0.621118	1.89095	0.28756	1	1	1	MIER1; EZH1;
FN2	1	14	0.310559	3.32394	0.264428	1	1	1	MRC1;
Tryp_SPc	4	115	1.24224	1.6076	0.239521	1	1	1	PRTN3; AZU1; ELANE; CELA3A;
UBQ	2	45	0.621118	2.059	0.255258	1	1	1	TMUB1; UHRF1;
EGF_CA	1	98	0.310559	0.475139	0.884204	1	1	1	LRP1;
ANX	1	13	0.310559	3.57943	0.248107	1	1	1	ANXA1;
AAA	10	145	3.10559	3.18277	0.00124791	1	0.224165	1	ABCB8; ABCC1; ABCD3; CHTF18; ORC4; SPATA5L1; CLPB; MCM3; RFC5; MCM4;
Zn_pept	1	21	0.310559	2.21649	0.369203	1	1	1	AGBL3;
CCP	1	55	0.310559	0.846544	0.70126	1	1	1	IL2RA;
IQ	3	84	0.931677	1.65198	0.274525	1	1	1	MYO9B; MYH2; MYO5C;
CYCLIN	3	37	0.931677	3.74988	0.0456558	1	1	1	CCNK; RB1; CCNA2;
CXC	2	7	0.621118	13.2205	0.00916247	1	0.740633	1	KIF4A; EZH1;
PDZ	5	150	1.5528	1.53988	0.226715	1	1	1	DLG1; LIN7C; RGS3; SYNJ2BP; TJP3;
PH	5	278	1.5528	0.830897	0.724318	1	1	1	ASAP2; TBC1D2B; ARHGEF7; VAV2; SKAP2;
Arrestin_C	1	10	0.310559	4.65218	0.196945	1	1	1	TXNIP;
RHOD	2	22	0.621118	4.21062	0.081502	1	1	1	USP8; TSTD1;
S_TK_X	2	56	0.621118	1.65463	0.343588	1	1	1	PRKCA; STK38;
C2	3	138	0.931677	1.0056	0.5787	1	1	1	PLCB3; PRKCA; RGS3;
HECTc	1	28	0.310559	1.66256	0.459093	1	1	1	HERC6;
Gal-bind_lectin	1	16	0.310559	2.90871	0.296019	1	1	1	LGALS3;
GLECT	1	16	0.310559	2.90871	0.296019	1	1	1	LGALS3;
Kelch	1	58	0.310559	0.802764	0.720349	1	1	1	IVNS1ABP;
BCL	2	12	0.621118	7.71654	0.0268103	1	1	1	BCL2; BCL2L1;
FBOX	2	52	0.621118	1.78188	0.311695	1	1	1	FBXO7; FBXW11;
HATPase_c	2	18	0.621118	5.14579	0.0570937	1	1	1	PDK3; TOP2A;
LIM	1	73	0.310559	0.637835	0.799025	1	1	1	LIMS1;
PD	1	8	0.310559	5.81378	0.160924	1	1	1	GAA;
Cyclin_C	2	17	0.621118	5.4483	0.0514695	1	1	1	CCNK; CCNA2;
SH2	2	111	0.621118	0.834841	0.697634	1	1	1	FGR; VAV2;
TyrKc	1	88	0.310559	0.529126	0.855615	1	1	1	FGR;
GuKc	2	26	0.621118	3.56308	0.108465	1	1	1	DLG1; TJP3;
PTPc	1	37	0.310559	1.25826	0.556154	1	1	1	PTPRJ;
PLCXc	1	16	0.310559	2.90871	0.296019	1	1	1	PLCB3;
PLCYc	1	15	0.310559	3.10249	0.280396	1	1	1	PLCB3;
PWWP	1	19	0.310559	2.44968	0.340886	1	1	1	ZMYND8;
S4	1	5	0.310559	9.29508	0.10385	1	1	1	IMP3;
JmjC	1	33	0.310559	1.41074	0.515368	1	1	1	KDM3B;
CHROMO	1	34	0.310559	1.36926	0.525902	1	1	1	MORF4L1;
STYKc	2	48	0.621118	1.93034	0.27949	1	1	1	CDK1; STRADA;
TSP1	1	64	0.310559	0.727517	0.754956	1	1	1	ADAMTSL4;
DSRM	1	20	0.310559	2.32725	0.3552	1	1	1	DGCR8;
Cog4	1	1	0.310559	46.1073	0.0216879	1	1	1	COG4;
ARM	4	29	1.24224	6.37333	0.00336107	1	0.407529	1	TMCO6; ARVCF; JUP; KPNA2;
TUDOR	1	27	0.310559	1.72412	0.447079	1	1	1	SMN1;
PHD	3	92	0.931677	1.50835	0.321999	1	1	1	PHF14; ZMYND8; UHRF1;
L27	2	13	0.621118	7.12342	0.0312378	1	1	1	DLG1; LIN7C;
BRLZ	1	52	0.310559	0.895373	0.680872	1	1	1	CEBPB;
PX	1	45	0.310559	1.03462	0.627744	1	1	1	HS1BP3;
ZnF_C2HC	1	42	0.310559	1.10851	0.602358	1	1	1	ZCCHC6;
HA2	2	18	0.621118	5.14579	0.0570937	1	1	1	DHX29; DHX36;
MHC_II_beta	1	10	0.310559	4.65218	0.196945	1	1	1	HLA-DRB1;
IGc1	1	41	0.310559	1.13554	0.593517	1	1	1	HLA-DRB1;
TGFB	1	38	0.310559	1.22516	0.565804	1	1	1	TGFB3;
ZnF_C3H1	2	44	0.621118	2.10579	0.247185	1	1	1	ZFP36L1; MKRN3;
BACK	1	61	0.310559	0.763291	0.738222	1	1	1	IVNS1ABP;
S1	1	12	0.310559	3.87747	0.231425	1	1	1	SRBD1;
CLECT	2	86	0.621118	1.0775	0.559724	1	1	1	CD69; MRC1;
C1	3	67	0.931677	2.07108	0.177652	1	1	1	MYO9B; PRKCA; VAV2;
RA	1	31	0.310559	1.50172	0.493594	1	1	1	MYO9B;
MYSc	3	38	0.931677	3.65122	0.0488004	1	1	1	MYO9B; MYH2; MYO5C;
CARD	1	17	0.310559	2.73771	0.311303	1	1	1	CASP2;
CASc	1	14	0.310559	3.32394	0.264428	1	1	1	CASP2;
RhoGEF	3	67	0.931677	2.07108	0.177652	1	1	1	ARHGEF7; VAV2; ARHGEF15;
LDLa	3	47	0.931677	2.9522	0.0815617	1	1	1	LRP1; LRP5; CD320;
FHA	2	28	0.621118	3.30866	0.122714	1	1	1	CEP170; NBN;
DIL	1	6	0.310559	7.74848	0.123292	1	1	1	MYO5C;
LEM	1	7	0.310559	6.64313	0.142314	1	1	1	LEMD2;
Carb_anhydrase	2	17	0.621118	5.4483	0.0514695	1	1	1	CA2; CA1;
Tubulin	1	23	0.310559	2.02383	0.396306	1	1	1	TUBAL3;
Tubulin_C	1	22	0.310559	2.11578	0.382903	1	1	1	TUBAL3;
SERPIN	2	35	0.621118	2.64712	0.175505	1	1	1	SERPINB2; SERPINB10;
ETS	1	28	0.310559	1.66256	0.459093	1	1	1	ETV6;
DHDPS	1	2	0.310559	23.1683	0.0429068	1	1	1	NPL;
CNH	1	13	0.310559	3.57943	0.248107	1	1	1	TNIK;
RHO	1	20	0.310559	2.32725	0.3552	1	1	1	RAC1;
Beta-TrCP_D	1	2	0.310559	23.1683	0.0429068	1	1	1	FBXW11;
RNAse_Pc	1	9	0.310559	5.16852	0.179132	1	1	1	RNASE6;
KOW	1	8	0.310559	5.81378	0.160924	1	1	1	MRPL24;
SAM_PNT	1	13	0.310559	3.57943	0.248107	1	1	1	ETV6;
PlsC	2	18	0.621118	5.14579	0.0570937	1	1	1	AUP1; LPGAT1;
HMG	1	51	0.310559	0.912926	0.673773	1	1	1	WDHD1;
ArfGap	1	28	0.310559	1.66256	0.459093	1	1	1	ASAP2;
LisH	1	28	0.310559	1.66256	0.459093	1	1	1	NOLC1;
t_SNARE	2	22	0.621118	4.21062	0.081502	1	1	1	STX5; VTI1A;
MAGUK_N_PEST	1	4	0.310559	11.6131	0.0839781	1	1	1	DLG1;
Transket_pyr	1	8	0.310559	5.81378	0.160924	1	1	1	BCKDHB;
BROMO	1	43	0.310559	1.08273	0.611006	1	1	1	ZMYND8;
IBN_N	2	16	0.621118	5.78861	0.0460594	1	1	1	IPO11; XPO6;
LY	2	15	0.621118	6.17426	0.0408756	1	1	1	LRP1; LRP5;
ELM2	1	13	0.310559	3.57943	0.248107	1	1	1	MIER1;
KISc	3	44	0.931677	3.15344	0.0697831	1	1	1	KIF23; KIF4A; KIFC1;
PI3Kc	1	16	0.310559	2.90871	0.296019	1	1	1	ATM;
PROF	1	2	0.310559	23.1683	0.0429068	1	1	1	PFN2;
DNaseIc	1	4	0.310559	11.6131	0.0839781	1	1	1	DNASE1;
RPR	1	8	0.310559	5.81378	0.160924	1	1	1	RPRD2;
POLBc	1	4	0.310559	11.6131	0.0839781	1	1	1	POLA1;
RICIN	1	28	0.310559	1.66256	0.459093	1	1	1	MRC1;
UBA	2	32	0.621118	2.89521	0.152413	1	1	1	UBAP2L; UBASH3B;
YqgFc	1	2	0.310559	23.1683	0.0429068	1	1	1	SRBD1;
Longin	1	5	0.310559	9.29508	0.10385	1	1	1	VAMP7;
TGc	2	11	0.621118	8.41741	0.0226623	1	1	1	F13A1; TGM3;
tRNA_SAD	1	7	0.310559	6.64313	0.142314	1	1	1	TARS2;
THUMP	1	3	0.310559	15.4712	0.063667	1	1	1	THUMPD3;
CY	2	17	0.621118	5.4483	0.0514695	1	1	1	CST7; CSTB;
FATC	1	6	0.310559	7.74848	0.123292	1	1	1	ATM;
Int_alpha	1	19	0.310559	2.44968	0.340886	1	1	1	ITGAM;
CULLIN	1	8	0.310559	5.81378	0.160924	1	1	1	CUL3;
Cullin_Nedd8	1	8	0.310559	5.81378	0.160924	1	1	1	CUL3;
ML	1	4	0.310559	11.6131	0.0839781	1	1	1	NPC2;
PostSET	1	18	0.310559	2.5857	0.326257	1	1	1	EHMT2;
BRIGHT	1	15	0.310559	3.10249	0.280396	1	1	1	ARID2;
ARID	1	15	0.310559	3.10249	0.280396	1	1	1	ARID2;
Inhibitor_I29	2	7	0.621118	13.2205	0.00916247	1	0.740633	1	CTSH; CTSS;
PINc	2	6	0.621118	15.4202	0.00663935	1	0.644017	1	FCF1; NOB1;
ClpB_D2-small	1	2	0.310559	23.1683	0.0429068	1	1	1	CLPB;
SMC_hinge	1	6	0.310559	7.74848	0.123292	1	1	1	SMC2;
BH4	2	3	0.621118	30.7893	0.00138659	1	0.224165	1	BCL2; BCL2L1;
PreSET	1	6	0.310559	7.74848	0.123292	1	1	1	EHMT2;
LA	1	7	0.310559	6.64313	0.142314	1	1	1	LARP4B;
ALBUMIN	1	4	0.310559	11.6131	0.0839781	1	1	1	ALB;
LH2	1	16	0.310559	2.90871	0.296019	1	1	1	ALOX15;
TOP2c	1	2	0.310559	23.1683	0.0429068	1	1	1	TOP2A;
TOP4c	1	2	0.310559	23.1683	0.0429068	1	1	1	TOP2A;
SRA	1	2	0.310559	23.1683	0.0429068	1	1	1	UHRF1;
IL1	1	10	0.310559	4.65218	0.196945	1	1	1	IL1B;
CUE	1	7	0.310559	6.64313	0.142314	1	1	1	AUP1;
MoCF_biosynth	1	2	0.310559	23.1683	0.0429068	1	1	1	GPHN;
TAN	1	1	0.310559	46.1073	0.0216879	1	1	1	ATM;
PKS_ER	1	1	0.310559	46.1073	0.0216879	1	1	1	FASN;
PKS_KR	1	1	0.310559	46.1073	0.0216879	1	1	1	FASN;
BING4CT	1	1	0.310559	46.1073	0.0216879	1	1	1	WDR46;
Pumilio	1	4	0.310559	11.6131	0.0839781	1	1	1	PUM1;
Alpha-mann_mid	2	5	0.621118	18.4981	0.00449042	1	0.483968	1	MAN2A1; MAN2A2;
Nbs1_C	1	1	0.310559	46.1073	0.0216879	1	1	1	NBN;
Flavokinase	1	1	0.310559	46.1073	0.0216879	1	1	1	RFK;

## Sheet: Site of expression
Analysis: Site of expression
Dataset name: LysateBanLecp005
Number of genes in the dataset: 444
Number of genes in the dataset (which are available in Site of expression database) :444
Number of genes in background: 18297
Is analysis quantitative: No
						Corrected p-values
Site of expression	No. of genes in the dataset	No. of genes in the background dataset	Percentage of genes	Fold enrichment	P-value (Hypergeometric test)	Bonferroni method	BH method	Q-value (Storey-Tibshirani method)	genes mapped (from input data set)
H293	331	6792	74.5495	2.00831	2.79255e-59	2.36809e-56	2.36809e-56	9.27417e-56	ABCB8; ABCC1; ABCD3; ANAPC4; ANKHD1; ARID2; ARPP19; ASAP2; ATM; AUP1; AURKB; BCKDHB; BCL2; BRI3BP; C21orf59; C9orf78; CAAP1; CASP2; CBLL1; CCNK; CDK1; CDK12; CDK13; CDK2AP1; CDK6; CDV3; CEBPB; CELF1; CENPH; CHAF1B; CHEK1; CHTF18; CKAP2; CLUH; COG4; CRTC2; CYP51A1; DCUN1D5; DDX10; DDX18; DDX19B; DDX31; DES; DHCR24; DHX29; DHX36; DLG1; DLGAP4; DPCD; DUSP12; EBP; EHMT2; EIF4EBP1; EIF4ENIF1; ETV6; F8…
HEK293	231	4439	52.027	2.14453	2.67005e-37	2.2642e-34	1.1321e-34	4.43366e-34	ABCB8; ABCC1; ABCD3; ANKHD1; ARID2; ARPP19; ASAP2; AUP1; BCL2; BRI3BP; C21orf59; C9orf78; CAAP1; CASP2; CCNK; CDK1; CDK12; CDK13; CDV3; CELF1; CENPH; CHAF1B; CHEK1; CHTF18; CKAP2; CLUH; CRTC2; CYP51A1; DCUN1D5; DDX10; DDX18; DDX19B; DHCR24; DHX29; DHX36; DLG1; DUSP12; EHMT2; EIF4ENIF1; F8A1; FAM162A; FAM98A; FANCD2; FANCI; FBXO7; FTSJ3; FUBP1; HCCS; HDAC3; HN1; IMP3; INTS2; IPO11; ISY1; KAT7; KDM…
Jurkat A3	213	4200	47.973	2.08996	1.25002e-31	1.06002e-28	3.53339e-29	1.38379e-28	ABCC1; ARID2; ATM; AUP1; BCKDHB; BCL2; BRI3BP; C1orf112; C9orf78; CBLL1; CCR4; CD82; CDC42SE2; CDK1; CDK13; CDK6; CDV3; CENPH; CENPK; CHEK1; CHTF18; CKAP2; CLK3; CLUH; COG4; DCAF13; DCUN1D5; DDX31; DES; DHX29; DHX36; DLG1; DPH5; DSCC1; DUS3L; EBP; EIF4ENIF1; ELP5; ETV6; F8A1; FAM162A; FAM98A; FANCD2; FANCI; FAR1; FBXO7; FTSJ3; GRIPAP1; HCCS; HIGD1A; HN1; INTS2; ISY1; KAT7; KDM3B; KIF1BP; LARP4B; …
CRC	206	4247	46.3964	1.99891	1.69549e-27	1.43778e-24	3.59444e-25	1.4077e-24	ABCC1; ABCD3; ASAP2; AUP1; AURKB; BRI3BP; C9orf78; CAAP1; CDC42SE2; CDK1; CDK12; CDK13; CDK2AP1; CDK6; CDV3; CKAP2; CLUH; CYP51A1; DDX18; DDX19B; DDX31; DES; DHCR24; DHX29; DLG1; DPCD; EBP; FAM162A; FANCI; FCF1; FUBP1; GRSF1; HIGD1A; HN1; IPO11; KIAA0101; LARP4B; LEMD2; LIN7C; MAN1A1; MAN2A1; MED14; MMAB; MMP14; MORF4L1; MRPL2; MRPL47; MRPL54; MRPS26; MYL12B; NCAPD3; NDEL1; NDUFAF3; NUDT15; ORC4;…
CD8	168	3327	37.8378	2.08098	4.22027e-23	3.57878e-20	7.15757e-21	2.80313e-20	ANKHD1; ATM; BCKDHB; BCL2; C21orf59; C9orf78; CASP2; CCNK; CDC42SE2; CDK1; CDK12; CDK6; CDV3; CENPH; CKAP2; CLUH; DDX10; DDX18; DDX19B; DLG1; DLGAP4; EBP; EIF4EBP1; FAM162A; FAM98A; FANCD2; FANCI; FBXO7; FTSJ3; FUBP1; HLA-DRB1; HN1; HPDL; IMP3; ISY1; KDM3B; KIAA0101; KIF1BP; KIFC1; MMAB; MYL12B; MYO9B; NOC2L; NUFIP2; ORC4; OXA1L; PHAX; POLA1; PRCC; PRKCA; PRMT3; PSAT1; PSMD5; PSMG3; PYCR1; RAC1; …
Serum	285	7685	64.1892	1.52828	1.35305e-21	1.14739e-18	1.91231e-19	7.48921e-19	ABCB8; ABCC1; ANAPC4; ANKHD1; ARID2; ARPP19; ASAP2; ATM; AUP1; AURKB; BCL2; C21orf59; C9orf78; CASP2; CBLL1; CCNK; CD69; CDK1; CDK12; CDK13; CDK6; CDV3; CEBPB; CELF1; CENPH; CHAF1B; CHEK1; CHTF18; CKAP2; CLUH; COG4; COX6A1; CYP51A1; DAPL1; DCUN1D5; DDX10; DDX18; DDX19B; DDX31; DES; DHCR24; DHX29; DHX36; DPCD; DPH5; DUSP12; EBP; EHMT2; EIF4EBP1; FAM162A; FAM98A; FANCD2; FANCI; FBXO7; FBXW11; FTSJ3…
Embryonic stem cells	154	3047	34.6847	2.08287	7.40777e-21	6.28179e-18	8.97398e-19	3.51449e-18	ABCB8; ABCC1; ABCD3; ANKHD1; AUP1; BCKDHB; BRI3BP; CDK1; CDV3; CELF1; CHEK1; CHTF18; CLUH; CYP51A1; DDX10; DDX18; DHCR24; DHX29; DHX36; DUS3L; FAM162A; FANCD2; FANCI; FAR1; FCF1; FTSJ3; FUBP1; HCCS; HIGD1A; IMP3; IPO11; KDM3B; LEMD2; LPGAT1; MAN2A1; MMP14; MRPL2; MRPL24; MRPL47; MRPS26; MYO9B; NAA40; NCAPD3; NDC1; NDUFAF3; NMD3; NOC2L; NOP14; NSA2; ORC4; OXA1L; PDK3; PEX14; PFN2; PRMT3; PSMD5; PY…
CaOV3	163	3355	36.7117	2.0022	1.68105e-20	1.42553e-17	1.78191e-18	6.97852e-18	ABCC1; ABCD3; AUP1; BCKDHB; BCL2L1; BRI3BP; CASP2; CBLL1; CDK1; CDK13; CDK2AP1; CDV3; CEBPB; CELF1; CLUH; COX6A1; CYP51A1; DDX18; DHCR24; DLG1; ETV6; F8A1; FAM162A; FAM98A; HIGD1A; HLA-DRB1; HN1; HPDL; KAT7; KDM3B; KIF23; LEMD2; LIN7C; MAN2A1; MMAB; MMP14; MORF4L1; MRPL2; MRPL47; MRPL54; MRPS18B; MRPS21; MRPS26; MYL12B; NDEL1; NUFIP2; PAIP2; PEX14; PFN2; PHAX; PLCB3; PSAT1; PSMD5; PYCR1; RAC1; RF…
OVCAR3	174	3714	39.1892	1.93072	1.91167e-20	1.62109e-17	1.80122e-18	7.05413e-18	ABCD3; ARPP19; BCKDHB; BCL2L1; BRI3BP; C21orf59; CASP2; CCNK; CDC42SE2; CDK1; CDK12; CDV3; CELF1; CEND1; CENPH; CHTF18; CLUH; COX6A1; DDX18; DHCR24; DHX36; DLG1; DLGAP4; DPCD; DSCC1; DUSP12; EBP; EIF4EBP1; EIF4ENIF1; FAM162A; GALT; HCCS; HIGD1A; HN1; IMP3; ISY1; KDM3B; KIF4A; LEMD2; LIN7C; MMAB; MRPL47; MRPS18B; MRPS21; MRPS26; MYL12B; NDC1; NDUFAF3; NTMT1; NUDT15; NUFIP2; PAIP2; PEX14; PFN2; PHA…
ES2	167	3527	37.6126	1.9513	6.35794e-20	5.39153e-17	5.39153e-18	2.11149e-17	ABCC1; ABCD3; ANKHD1; ARPP19; BRI3BP; C9orf78; CBLL1; CCNK; CDK1; CDV3; CEBPB; CELF1; CLUH; COG4; COX6A1; CYP51A1; DCUN1D5; DDX18; DDX19B; DHCR24; DHX29; DHX36; DLG1; DPH5; EBP; EIF4EBP1; FAM162A; FAM98A; FTSJ3; GTF2H4; HCCS; HN1; IPO11; ISY1; KDM3B; KIAA0101; KIF1BP; KIFC1; LIN7C; LPGAT1; MAN2A1; MIER1; MMAB; MMP14; MRPL2; MRPL47; MRPL54; MRPS18B; MRPS21; MYL12B; NDC1; NMD3; NOB1; NTMT1; NUFIP2;…
Ascites cancer cell	165	3509	37.1622	1.93782	2.52791e-19	2.14366e-16	1.94879e-17	7.63206e-17	ABCB8; ABCC1; ABCD3; ANAPC4; ANKHD1; AUP1; BCL2L1; BRI3BP; CBLL1; CCNK; CDC42SE2; CDK13; CDV3; CEBPB; CELF1; CHTF18; CLUH; CYP51A1; DDX19B; DES; DHCR24; DHX36; DLGAP4; DSCC1; EBP; EHMT2; FAM162A; FAM98A; HLA-DRB1; HN1; KAT7; LEMD2; LIN7C; MAN2A1; MIER1; MMP14; MORF4L1; MRPL2; MRPL47; MRPS18B; MRPS21; MRPS26; MYL12B; MYO9B; NDUFAF3; NUFIP2; PAIP2; PEX14; PLCB3; PRCC; PYCR1; RAC1; RAD9A; RIF1; RPRD…
HeLa	230	5789	51.8018	1.63731	3.97797e-19	3.37332e-16	2.8111e-17	1.10092e-16	ABCB8; ABCD3; ANAPC4; ANKHD1; ARID2; ARPP19; ATM; AURKB; BRI3BP; C1orf112; C21orf59; C9orf78; CASP2; CCNK; CDK1; CDK12; CDK13; CDK6; CDV3; CEBPB; CENPH; CENPK; CHAF1B; CHEK1; CKAP2; CLUH; DCAF13; DCUN1D5; DDX10; DDX18; DDX31; DES; DUSP12; EBP; EHMT2; FAM98A; FANCD2; FANCI; FAR1; FBXW11; FCF1; FTSJ3; FUBP1; GRIPAP1; HCCS; HDAC3; HN1; IMP3; IPO11; ISY1; KAT7; KDM3B; KIF23; KIF4A; KIFC1; LAG3; LARP4…
global_SCX_fractionated	131	2476	29.5045	2.18042	5.10378e-19	4.32801e-16	3.11944e-17	1.22167e-16	ABCC1; ABCD3; AUP1; BCKDHB; BCL2L1; CCNK; CDK1; CDK12; CDK2AP1; CDV3; CELF1; CLUH; COX6A1; DDX18; DDX19B; DHCR24; DHX29; DHX36; DLG1; EBP; ELP5; FAM162A; FAM98A; FBXO7; FBXW11; FTSJ3; FUBP1; GALT; HCCS; HN1; INTS2; IPO11; LIN7C; MRPS18B; MYL12B; NMD3; NOB1; NOP14; NTMT1; NUDT15; OXA1L; PEX14; PLCB3; PSAT1; PSMD5; PYCR1; QTRT1; RAC1; RFK; RPRD2; SMN1; SPATA5L1; SRBD1; TMEM41B; TOMM34; TOMM40; KRT6…
Jurkat	144	2869	32.4324	2.06846	5.15001e-19	4.36721e-16	3.11944e-17	1.22167e-16	ABCB8; ABCD3; ANAPC4; ASAP2; ATM; AUP1; AURKB; BCKDHB; BCL2L1; BRI3BP; C1orf112; C21orf59; C9orf78; CCNK; CD69; CD82; CDK1; CDK12; CDK6; CELF1; CENPH; CHEK1; CLK3; CLUH; COG4; DDX10; DDX31; DHCR24; DHX29; DLG1; EBP; FANCD2; FAR1; FCF1; FUBP1; GRIPAP1; GRSF1; HCCS; HDAC3; HIGD1A; HN1; INTS2; IPO11; KDM3B; KIFC1; LEMD2; LIMS1; LIN7C; MAN1A1; MRPS21; NDC1; NOB1; NOP14; PDK3; PFN2; PHAX; PLCB3; PRCC;…
Ramos	96	1566	21.6216	2.52644	9.39956e-18	7.97082e-15	5.31388e-16	2.08108e-15	ABCB8; ABCD3; ANAPC4; ATM; AUP1; AURKB; BRI3BP; CASP2; CCNK; CDK1; CDK12; CDK6; CHEK1; CKAP2; CLUH; COG4; DHX36; EBP; FAM98A; FANCD2; FBXW11; HCCS; IPO11; KIAA0101; KIF4A; KIFC1; LIN7C; MMAB; MRPS21; MYO9B; NDC1; NDUFAF3; NTMT1; PDK3; PFN2; PRKCA; PRMT3; PUM1; PYCR1; RANBP6; RIF1; RRM2; SEC24B; SLC35E1; SMC2; SMN1; SOAT1; TEX264; UBE2C; UNC119B; XPO6; ACAD9; ADA; BLOC1S1; CPT1A; DSG1; FGR; NUP37;…
Sy5y	123	2490	27.7027	2.03576	2.00843e-15	1.70315e-12	1.06447e-13	4.16879e-13	ASAP2; CBLL1; CDK2AP1; CEND1; CENPK; CHEK1; CKAP2; CYP51A1; DCUN1D5; DDX19B; DPCD; EIF4ENIF1; FAM98A; FUBP1; GRSF1; ISY1; KIF4A; LEMD2; MORF4L1; MRPL2; MRPL24; MRPL54; MRPS18B; MRPS21; MRPS26; MYL12B; MYO9B; NDEL1; NDUFAF3; NMD3; NOB1; NUFIP2; PEX14; PFN2; PHAX; PLCB3; PRCC; PRKCA; PYCR1; RAC1; RIF1; RMI2; RPRD2; SEC24B; SHOC2; SMC2; SRSF12; STX5; SYNJ2BP; TMUB1; TOMM34; TOMM40; TOMM6; TTC1; UBE2…
YTS	101	1888	22.7477	2.20469	1.02703e-14	8.70918e-12	5.12305e-13	2.00635e-12	ABCC1; ABCD3; AUP1; CDK1; CELF1; CHEK1; CHTF18; CLK3; CLUH; CYP51A1; DDX18; DDX19B; DHCR24; EIF4ENIF1; FAM98A; FANCI; FTSJ3; HLA-DRB1; IMP3; INTS2; KIF4A; KIFC1; LARP4B; LEMD2; LPGAT1; MAN1A1; MAN2A1; MED14; MYO9B; NCAPD3; NDC1; NMD3; NOB1; NOP14; NUFIP2; PEX14; PUM1; RAC1; RB1; RIF1; RRM2; SEC24B; SLC35E1; SMC2; SOAT1; SPATA5L1; STX5; TEX264; TMEM41B; TMUB1; TOMM34; TOMM40; TTC4; TUBGCP4; VAMP3;…
HCT116	126	2651	28.3784	1.95876	1.50683e-14	1.2778e-11	7.09887e-13	2.78014e-12	ABCC1; BRI3BP; CDK1; CDK12; CDV3; CELF1; CLUH; CYP51A1; DCAF13; DDX10; DDX18; DDX19B; DDX31; DES; DHX29; DPCD; EBP; FAM162A; FANCI; FCF1; FTSJ3; FUBP1; GRSF1; GTF2H4; IMP3; IPO11; KIF1BP; KIF4A; LARP4B; MYL12B; NCAPD3; NOC2L; NOP14; NSA2; NTMT1; NUDT15; OXA1L; PFN2; PLCB3; PSAT1; PSMD5; PSMG3; PYCR1; RAC1; RANBP6; REXO4; RRM2; RSRC2; SDAD1; SEC24B; SLC35E1; SMC2; TMEM70; TOMM34; TOMM40; UBE2C; VA…
K-562	120	2513	27.027	1.96793	5.99268e-14	5.0818e-11	2.67463e-12	1.04747e-11	ANAPC4; ATM; AURKB; BRI3BP; C21orf59; C9orf78; CCNK; CDK1; CDK12; CDK13; CDK6; CDV3; CENPH; CLUH; COG4; DDX10; DDX18; DDX19B; DHX36; EIF4EBP1; FAM98A; FANCD2; FANCI; FBXO7; FTSJ3; FUBP1; GRSF1; GTF2H4; HCCS; HN1; IPO11; KIFC1; LIN7C; MRPS21; MRPS26; MYL12B; MYO9B; NDUFAF3; NUFIP2; ORC4; PDK3; POLA1; PRCC; PRKCA; PRMT3; PSAT1; PSMD5; PSMG3; PYCR1; RIF1; RRM2; SLC35E1; SMC2; SOAT1; SPC25; TEX264; T…
Monocyte	130	2842	29.2793	1.88512	8.97998e-14	7.61502e-11	3.80751e-12	1.49114e-11	ABCC1; ANKHD1; ASAP2; ATM; BCL2; BRI3BP; CDK1; CEBPB; CYP51A1; DCUN1D5; DDX18; DHCR24; DHX36; DLG1; DLGAP4; DUSP12; EBP; FAM162A; FUBP1; HLA-DRB1; IMP3; KDM3B; KIF1BP; LIN7C; MAN2A1; MMAB; MRPL54; MRPS18B; MYL12B; MYO9B; NDC1; NMD3; OXA1L; PSAT1; PSMD5; PYCR1; RAC1; SEC24B; SMN1; STX5; TARS2; TEX264; TOMM34; TOMM40; VAMP7; ZCCHC6; ZFP36L1; KRT6A; ACAD9; BLOC1S1; CPT1A; DSG1; GAA; KRT13; KRT19; LG…
Placenta	334	10894	75.2252	1.26345	1.54882e-12	1.3134e-09	6.25428e-11	2.44937e-10	ABCB8; ABCC1; ABCD3; ANKHD1; ARID2; ASAP2; ATM; AUP1; AURKB; BCKDHB; BCL2; BORA; BRI3BP; C1orf112; C21orf59; C9orf78; CAAP1; CASP2; CBLL1; CCR4; CD82; CDK1; CDK12; CDK13; CDK2AP1; CDK6; CDV3; CEBPB; CELF1; CHAF1B; CKAP2; CRTC2; CYP51A1; DDX10; DDX18; DES; DHCR24; DHX29; DLG1; DLGAP4; DUSP12; EBP; EIF4EBP1; EIF4ENIF1; ELP5; ETV6; FAM162A; FAM98A; FANCD2; FAR1; FBXO7; FBXW11; FUBP1; GALT; GBP6; GRI…
R	97	1948	21.8468	2.05217	3.02195e-12	2.56262e-09	1.16483e-10	4.56182e-10	ANAPC4; ANKHD1; AUP1; C9orf78; CCNK; CDK1; CDK6; CDV3; CLUH; DCUN1D5; DDX18; DDX19B; DHX29; DHX36; DPH5; DUSP12; FAM98A; FBXO7; FUBP1; HN1; IPO11; KDM3B; KIFC1; MMAB; MYL12B; NCAPD3; NMD3; NOC2L; ORC4; PLCB3; POLA1; PRCC; PRMT3; PSAT1; PSMD5; PYCR1; QTRT1; RAC1; RAD9A; RNASEH2B; RRM2; SEC24B; SMC2; SPATA5L1; THUMPD3; TOMM34; TTC1; TTC4; USP8; WDHD1; KRT19; SERPINB2; BMI1; CCDC9; FNBP4; UTP3; KRT1…
Bone marrow	254	7808	57.2072	1.3406	3.26598e-10	2.76955e-07	1.20415e-08	4.71584e-08	ABCC1; ABCD3; ANKHD1; ASAP2; ATM; AUP1; AURKB; BCL2; BCL2L1; BRI3BP; C1orf112; C9orf78; CAAP1; CASP2; CBLL1; CCNK; CCR4; CD82; CDK1; CDK12; CDK13; CDK2AP1; CDK6; CDV3; CEBPB; CELF1; CHAF1B; CKAP2; CRTC2; DDX10; DDX18; DDX19B; DHX36; DLG1; DLGAP4; DUSP12; EHMT2; EIF4EBP1; EIF4ENIF1; ELP5; ETV6; FAR1; FTSJ3; FUBP1; GALT; GRIPAP1; GRSF1; HCCS; HDAC3; HLA-DRB1; HPDL; ISY1; KDM3B; KIF1BP; KIF23; KIF4A…
CPE_SCX_fractionated	103	2331	23.1982	1.82105	6.15917e-10	5.22298e-07	2.17624e-08	8.52284e-08	ANKHD1; ASAP2; BCKDHB; CASP2; CEBPB; CLUH; DDX19B; DDX31; DHCR24; DHX36; DLG1; DLGAP4; ELP5; FTSJ3; FUBP1; GALT; HCCS; INTS2; KDM3B; LEMD2; MAN2A1; MYL12B; MYO9B; NMD3; NOB1; NSA2; NUDT15; ORC4; PHF14; PSAT1; PSMD5; PUM1; QTRT1; RPRD2; SHOC2; TOMM34; TOMM40; TTC4; UNC119B; KRT6A; ACAD9; ARHGEF7; DTX3L; GAA; HS1BP3; KLC4; LGMN; LRP1; MAVS; SERPINB2; CUL3; DHCR7; GPHN; HERC6; METTL13; NBN; PLP2; PM…
050603_BALF11	58	1019	13.0631	2.34591	1.22502e-09	1.03882e-06	4.15526e-08	1.62733e-07	ABCD3; CDC42SE2; CDK1; CDV3; COX6A1; CYP51A1; DHCR24; EBP; FAM162A; FANCI; HLA-DRB1; KDM3B; LIN7C; MRPL54; MYL12B; MYO9B; OXA1L; PEX14; PYCR1; SLC35E1; SMC2; STX5; TEX264; THUMPD3; TMEM70; TMUB1; TOMM40; ACAD9; MAVS; PRTN3; CSNK1G1; ITIH2; MFF; RPS15A; ALB; RRM1; KRT77; TYMS; ASNS; KRT10; NPM3; NOLC1; F13A1; TOP2A; NPC2; SCD; KRT1; FASN; HMGCS1; PPIF; YBX1; CTSB; MTHFD2; CA1; IL1B; SEMA4A; ANXA1;…
H358	73	1489	16.4414	2.02056	5.07867e-09	4.30671e-06	1.65643e-07	6.48709e-07	ARPP19; C9orf78; CDK1; CDK6; CELF1; DDX19B; DLG1; EIF4EBP1; FAM98A; FUBP1; GALT; HN1; ISY1; MAN1A1; MAN2A1; PFN2; PLCB3; PSAT1; PSMD5; PUM1; RRM2; WDHD1; KRT6A; ARSA; FUCA2; GAA; GGH; KRT19; LGMN; TSTD1; RPS15A; S100A2; ARVCF; KRT18; ALB; CTSZ; KRT8; DUT; CTSH; ASNS; JUP; IFI30; SLC16A3; NOLC1; RNASET2; UBAP2L; FUCA1; MCM3; MCM4; MCM2; TOP2A; LGALS3; HEXB; NPC2; CTSA; CTSC; KRT1; PCNA; FASN; RBM3…
Pancreatic fluid	18	136	4.05405	5.4567	5.31344e-09	4.5058e-06	1.66881e-07	6.5356e-07	KRT6A; KRT13; KRT19; ITIH2; KRT75; KRT5; KRT79; KRT18; ALB; KRT8; KRT77; KRT10; KRT14; HBD; KRT1; CA2; CA1; CELA3A;
RMUG	36	499	8.10811	2.97373	6.1241e-09	5.19324e-06	1.85473e-07	7.2637e-07	CD82; FUBP1; KIF23; MAN1A1; MAN2A1; MYL12B; PSAT1; ARSA; FUCA2; GGH; KRT19; LGMN; CHST11; RPS15A; ALB; CTSZ; KRT8; CTSH; ADAMTSL4; RNASET2; LGALS3; HEXB; HBD; NPC2; CTSA; CTSC; FASN; CTSB; ASAH1; PPT1; CREG1; HEXA; ANXA1; CSTB; GALNS; SMPDL3A;
Nipple aspirate fluid	46	754	10.3604	2.51456	9.20569e-09	7.80643e-06	2.69187e-07	1.05422e-06	HLA-DRB1; MAN1A1; MMP14; MYL12B; RAC1; KRT6A; FUCA2; GAA; GGH; KRT13; KRT19; LGMN; PRTN3; ITIH2; KRT75; KRT5; KRT79; KRT18; ALB; CTSZ; KRT8; CTSH; KRT10; IFI30; RNASET2; FUCA1; KRT14; LGALS3; SELENBP1; HEXB; HBD; NPC2; CTSA; KRT1; FASN; CA2; YBX1; CTSB; ASAH1; CA1; CD14; CREG1; HEXA; ANXA1; CSTB; GALNS;
Neutrophil	89	2031	20.045	1.80598	1.87763e-08	1.59223e-05	5.30742e-07	2.07855e-06	ATM; BRI3BP; CAAP1; CDK12; CEBPB; CELF1; CHTF18; DHX29; DLG1; EBP; EIF4ENIF1; ETV6; FUBP1; HLA-DRB1; KIAA0101; KIF23; KIF4A; KIFC1; MED14; MYL12B; NCAPD3; NUFIP2; OXA1L; PSAT1; RAC1; RSRC2; SMC2; SMN1; STX5; KRT6A; KRT13; KRT19; LRP1; POLR2J; PRTN3; DHCR7; DPEP2; FNBP4; ITIH2; NBN; PLP2; PTPRJ; KRT5; KRT18; ALB; CTSZ; KRT8; KRT77; KRT4; UHRF1; AZU1; KRT10; NPM3; JUP; IFI30; KPNA2; RNASET2; UBAP2L…
Gastric juice	23	243	5.18018	3.90193	2.91189e-08	2.46928e-05	7.96542e-07	3.11951e-06	KRT6A; KRT13; KRT19; MYH2; PRTN3; S100A2; KRT5; KRT3; ALB; KRT8; KRT4; KRT10; JUP; ELANE; KRT14; LGALS3; KRT1; CA2; CTSS; CELA3A; ANXA1; CSTB; TGM3;
MicroProt	32	440	7.20721	2.99785	3.64847e-08	3.0939e-05	9.66844e-07	3.78647e-06	DLG1; DLGAP4; FANCI; MMP14; MYO9B; SEC24B; KRT6A; GGH; KRT13; KRT19; ITIH2; KRT5; KRT82; ALB; KRT77; KRT4; UHRF1; CTSH; FLG2; KRT10; RNASET2; RNASE6; KRT14; HBD; NPC2; KRT1; CA2; CAMP; CTSS; CA1; THY1; CD14;
Pancreatic cancer	258	8316	58.1081	1.27852	4.1007e-08	3.47739e-05	1.05376e-06	4.12684e-06	ABCC1; ABCD3; ANKHD1; ASAP2; ATM; AUP1; AURKB; BCL2L1; BRI3BP; C1orf112; C21orf59; C9orf78; CAAP1; CASP2; CBLL1; CCNK; CCR4; CD82; CDK1; CDK12; CDK2AP1; CDK6; CDV3; CEBPB; CELF1; CHAF1B; CKAP2; COX6A1; CRTC2; CYP51A1; DDX10; DDX18; DES; DHCR24; DLG1; DUSP12; EBP; EIF4EBP1; EIF4ENIF1; ELP5; ETV6; FAM162A; FANCD2; FAR1; FUBP1; GALT; GRIPAP1; HCCS; HDAC3; HLA-DRB1; HPDL; ISY1; KDM3B; KIF1BP; KIF23; …
Embryonal carcinoma cells	61	1232	13.7387	2.04068	7.92214e-08	6.71797e-05	1.97587e-06	7.73815e-06	ABCC1; ABCD3; AUP1; CELF1; CYP51A1; DDX18; DDX19B; DHCR24; EBP; FAM162A; HCCS; KIFC1; LEMD2; MAN2A1; MMP14; MRPL2; MRPL47; MRPS21; NCAPD3; NDC1; OXA1L; PEX14; PYCR1; RAC1; RANBP6; SMC2; SYNJ2BP; TMEM41B; TOMM40; USP8; KRT6A; ACAD9; DSG1; GAA; KRT13; LRP1; MAVS; CEP170; ELOVL1; RPS15A; KRT5; KRT18; ALB; KRT8; KRT4; FLG2; KRT10; JUP; ACSL4; KPNA2; UBAP2L; MCM3; MCM4; KRT14; KRT1; FASN; MCM5; TRMT10…
MDA468	44	760	9.90991	2.38627	8.97846e-08	7.61374e-05	2.17535e-06	8.51937e-06	CD82; CDV3; FUBP1; HN1; KIF23; LIN7C; MYL12B; PLCB3; PSAT1; TTC1; KRT6A; GAA; GGH; KRT19; LGMN; KRT5; KRT18; ALB; CTSZ; KRT8; CTSH; KRT10; IFI30; RNASET2; MCM3; LGALS3; HEXB; HBD; NPC2; CTSA; CTSC; KRT1; PCNA; FASN; YBX1; CTSB; CTSS; PPT1; CD14; CREG1; ANXA1; CSTB; GALNS; PCNP;
B Cell	93	2254	20.9459	1.70044	1.46824e-07	0.000124506	3.45851e-06	1.35446e-05	ABCD3; ATM; BCL2; CASP2; CCR4; CD82; CLUH; DDX18; DES; DLG1; DPH5; FAM162A; FUBP1; GALT; HLA-DRB1; KIAA0101; LPGAT1; MAN2A1; MMAB; MYL12B; NDC1; PDK3; PSAT1; PSMD5; QTRT1; RAC1; TOMM40; VAMP3; VAMP7; KRT6A; ACAD9; FGR; IFIT1; KRT13; KRT19; LGMN; MAVS; NUP37; PRTN3; TSTD1; NEDD9; PLP2; PTPRJ; RPS15A; FCGR2B; KRT5; KRT82; KRT18; ALB; RRM1; CTSZ; KRT8; DUT; KRT77; IL2RA; KRT4; AZU1; RPL38; KRT10; JU…
Plasma	340	11971	76.5766	1.17044	1.69572e-07	0.000143797	3.88641e-06	1.52204e-05	ABCB8; ABCC1; ANAPC4; ANKHD1; ARID2; ARPP19; ASAP2; ATM; AUP1; BCKDHB; BCL2; BCL2L1; BRI3BP; C21orf59; CASP2; CBLL1; CCNK; CD69; CD82; CDK1; CDK12; CDK13; CDV3; CEBPB; CELF1; CENPH; CENPK; CHEK1; CHTF18; CKAP2; CLK3; COG4; COX6A1; CRTC2; CYP51A1; DCAF13; DCUN1D5; DDX18; DDX19B; DDX31; DES; DHX29; DHX36; DLG1; DLGAP4; DPH5; DUS3L; EBP; EHMT2; EIF4ENIF1; ELP5; ETV6; FANCD2; FANCI; FAR1; FBXO7; FBXW…
Oesophagus	49	921	11.036	2.19284	2.11811e-07	0.000179616	4.72673e-06	1.85113e-05	ATM; BCL2; CASP2; CD82; CDK1; CDK6; EIF4EBP1; EIF4ENIF1; ETV6; GRIPAP1; HCCS; OXA1L; PAIP2; PHF14; POLA1; RB1; SYNJ2BP; WDHD1; DSG1; KRT13; KRT19; LGMN; SYNE1; ABHD4; CCNA2; NBN; S100A2; KRT5; KRT18; KRT4; TYMS; KRT10; JUP; MCM3; MCM2; KRT14; TOP2A; MSRA; LGALS3; NPC2; KRT1; PCNA; CAMP; MCM5; CTSB; IL1B; CD14; CSTB; STK38;
Urine	122	3267	27.4775	1.53898	2.59802e-07	0.000220312	5.64903e-06	2.21234e-05	ATM; C9orf78; CDK1; CDV3; CLUH; CRTC2; DDX19B; DHX29; DLG1; FBXO7; GALT; GBP6; HLA-DRB1; MAN1A1; MAN2A1; MYL12B; MYO9B; OXA1L; PFN2; PRKCA; PSAT1; RAC1; RSRC2; SMC2; TNIK; VAMP3; VAMP7; WDHD1; ZCCHC6; KRT6A; ADA; ARSA; CST7; CYSTM1; DSG1; FUCA2; GAA; GGH; KRT13; KRT19; LGMN; LRP1; PRTN3; SERPINB2; SYNE1; TMBIM1; TSTD1; CUL3; ITIH2; NBN; PMVK; PTPRJ; DNASE1; S100A2; KRT75; KRT5; KRT82; NAAA; KRT18…
Saliva	48	912	10.8108	2.1693	3.89927e-07	0.000330658	8.26646e-06	3.23741e-05	CD82; GBP6; MAN2A1; MYO9B; KRT6A; DSG1; KRT13; KRT19; LRP1; PRTN3; ITIH2; S100A2; KRT75; KRT5; KRT82; KRT79; KRT3; KRT18; ALB; CTSZ; KRT8; KRT77; KRT4; AZU1; FLG2; KRT10; JUP; RNASET2; ELANE; KRT14; MSRA; LGALS3; HBD; NPC2; CTSA; CTSC; KRT1; CAMP; HNMT; TRMT10C; PPIF; CTSB; CA1; CD14; ANXA1; CSTB; TGM3; ITGAM;
Cervico-vaginal fluid	35	565	7.88288	2.55343	4.19152e-07	0.000355441	8.66929e-06	3.39517e-05	GBP6; MRPS21; MYL12B; ARSA; DSG1; GGH; KRT13; LGMN; PRTN3; SYNE1; RPS15A; KRT75; ALB; CTSZ; AZU1; CTSH; FLG2; JUP; RNASET2; ELANE; LGALS3; HEXB; HBD; CTSA; FASN; CTSB; CTSS; SSH1; CREG1; APOBR; ANXA1; CSTB; FTL; GALNS; TGM3;
Urothelial cancer	233	7521	52.4775	1.27669	6.50678e-07	0.000551775	1.31375e-05	5.14506e-05	ABCC1; ABCD3; ANKHD1; ASAP2; ATM; AUP1; AURKB; BCL2; BRI3BP; C1orf112; C21orf59; C9orf78; CAAP1; CASP2; CBLL1; CCR4; CD82; CDK1; CDK12; CDK2AP1; CDK6; CDV3; CEBPB; CELF1; CHAF1B; CKAP2; CRTC2; DDX10; DHCR24; DLG1; DUSP12; EBP; EIF4EBP1; EIF4ENIF1; ELP5; ETV6; FAM162A; FANCD2; FAR1; FUBP1; GALT; GBP6; GRIPAP1; HCCS; HDAC3; HLA-DRB1; HPDL; ISY1; KDM3B; KIF1BP; KIF23; LEMD2; LPGAT1; MAN2A1; MIER1; M…
hupo1_b2-hep_cam	45	848	10.1351	2.18723	7.39056e-07	0.00062672	1.45749e-05	5.70798e-05	ABCC1; ABCD3; AUP1; CDC42SE2; COX6A1; DHCR24; DLG1; EBP; FAM162A; HCCS; LEMD2; LIN7C; MAN2A1; MRPS18B; MYL12B; PEX14; RAC1; RB1; SEC24B; SLC35E1; STX5; TEX264; TOMM40; TXNIP; VTI1A; MAVS; SYNE1; CEP170; CHST11; CSNK1G1; DHCR7; ITIH2; MFF; RPS15A; ALB; KRT77; KRT10; JUP; KPNA2; KRT14; SCD; KRT1; FASN; KIAA0196; THY1;
Semen	49	966	11.036	2.09069	8.58044e-07	0.000727621	1.65368e-05	6.47635e-05	DPCD; MAN2A1; MMP14; PFN2; PSAT1; RAC1; VAMP3; ARSA; CYSTM1; FUCA2; GAA; GGH; LGMN; TMBIM1; CUL3; PTPRJ; TGFB3; DNASE1; KRT5; NAAA; ALB; CTSZ; KRT8; CTSH; KRT10; RNASET2; FUCA1; LGALS3; SELENBP1; HEXB; NPC2; CTSA; KRT1; FASN; CA2; CAMP; MAN2A2; CTSB; ASAH1; PPT1; CD14; CREG1; HEXA; SLC2A3; ANXA1; FTL; GALNS; SMPDL3A; NAGA;
Oral mucosa	190	5861	42.7928	1.33595	9.648e-07	0.00081815	1.81811e-05	7.1203e-05	ABCC1; ABCD3; ANKHD1; ASAP2; ATM; AUP1; AURKB; BRI3BP; C1orf112; C21orf59; C9orf78; CAAP1; CASP2; CBLL1; CCR4; CD82; CDK1; CDK12; CDK6; CDV3; CEBPB; CELF1; CHAF1B; CKAP2; CRTC2; DLG1; EIF4EBP1; EIF4ENIF1; ELP5; ETV6; FAM162A; FANCD2; FAR1; FUBP1; GBP6; HCCS; HDAC3; HPDL; ISY1; KDM3B; KIF1BP; KIF23; LEMD2; LPGAT1; MAN2A1; MIER1; MMP14; MRPL2; MRPL24; NDEL1; NTMT1; NUFIP2; ORC4; OXA1L; PHF14; PLCB3…
Cerebrospinal fluid	52	1059	11.7117	2.02383	1.02499e-06	0.000869189	1.88954e-05	7.40004e-05	MAN1A1; MAN2A1; PFN2; PLCB3; PSAT1; REXO4; KRT6A; ARSA; FUCA2; GAA; GGH; KRT13; KRT19; LRP1; MYH2; ITIH2; KRT5; KRT82; KRT3; KRT18; KRT36; ALB; CTSZ; KRT8; KRT77; KRT4; CTSH; FLG2; KRT10; JUP; RNASET2; FUCA1; RNASE6; KRT14; SELENBP1; HBD; NPC2; KRT1; CA2; MAN2A2; CTSB; CTSS; ASAH1; MRC1; CA1; PPT1; THY1; CD14; HEXA; ANXA1; FTL; TGM3;
Liver	330	11680	74.3243	1.16432	1.17907e-06	0.000999853	2.12735e-05	8.33136e-05	ABCC1; ABCD3; ANKHD1; ARID2; ASAP2; ATM; AUP1; BCKDHB; BCL2L1; BRI3BP; C1orf112; C21orf59; C9orf78; CAAP1; CASP2; CBLL1; CCNK; CD82; CDK1; CDK12; CDK13; CDK2AP1; CDK6; CEBPB; CELF1; CHAF1B; CHTF18; CKAP2; COG4; COX6A1; CYP51A1; DCAF13; DDX10; DDX19B; DDX31; DES; DHCR24; DHX29; DHX36; DLG1; DLGAP4; DSCC1; DUSP12; EBP; EIF4EBP1; EIF4ENIF1; ELP5; FAM162A; FAM98A; FANCD2; FANCI; FAR1; FBXO7; FBXW11; …
Pancreas	290	9936	65.3153	1.20279	1.21875e-06	0.0010335	2.13078e-05	8.34481e-05	ABCC1; ABCD3; ANKHD1; ARID2; ASAP2; ATM; AUP1; BORA; BRI3BP; C1orf112; C21orf59; C9orf78; CAAP1; CASP2; CBLL1; CCR4; CD82; CDK1; CDK12; CDK13; CDK2AP1; CDK6; CDV3; CEBPB; CELF1; CHAF1B; CKAP2; CRTC2; DDX10; DDX18; DES; DLG1; DUSP12; EIF4EBP1; EIF4ENIF1; ELP5; ETV6; FAM162A; FANCD2; FANCI; FAR1; FBXO7; FBXW11; FUBP1; GALT; GRIPAP1; HCCS; HDAC3; HLA-DRB1; HPDL; IMP3; IPO11; ISY1; KAT7; KDM3B; KIF1B…
Vagina	175	5307	39.4144	1.35894	1.23123e-06	0.00104408	2.13078e-05	8.34481e-05	ABCD3; ANKHD1; ASAP2; ATM; AUP1; AURKB; C1orf112; C21orf59; C9orf78; CAAP1; CASP2; CBLL1; CCR4; CD82; CDK1; CDK12; CDK6; CDV3; CEBPB; CELF1; CHAF1B; CKAP2; CRTC2; DLG1; EIF4EBP1; EIF4ENIF1; ELP5; ETV6; FAM162A; FAR1; FUBP1; GALT; GBP6; HCCS; HPDL; ISY1; KDM3B; KIF23; LEMD2; MAN2A1; MIER1; MMP14; MRPL2; MRPL24; NUFIP2; ORC4; PHF14; PLCB3; POLA1; PRCC; PRKCA; PRMT3; PSAT1; PSMD5; PSMG3; PUM1; RAD9A…
Breast cancer	230	7467	51.8018	1.26937	1.43389e-06	0.00121594	2.43188e-05	9.524e-05	ABCC1; ABCD3; ANKHD1; ASAP2; ATM; AUP1; AURKB; BCL2; BCL2L1; BRI3BP; C1orf112; C21orf59; C9orf78; CAAP1; CASP2; CBLL1; CCR4; CD82; CDK1; CDK12; CDK2AP1; CDK6; CDV3; CEBPB; CELF1; CHAF1B; CKAP2; CRTC2; DDX10; DHCR24; DLG1; DUSP12; EBP; EIF4EBP1; EIF4ENIF1; ELP5; ETV6; FAM162A; FANCD2; FAR1; FUBP1; GALT; GRIPAP1; HCCS; HDAC3; HPDL; ISY1; KDM3B; KIF1BP; KIF23; LEMD2; LPGAT1; MAN2A1; MIER1; MMP14; MR…
Stomach cancer	228	7399	51.3514	1.26989	1.65449e-06	0.001403	2.75099e-05	0.000107737	ABCC1; ABCD3; ANKHD1; ASAP2; ATM; AUP1; AURKB; BCL2L1; BRI3BP; C1orf112; C21orf59; C9orf78; CAAP1; CASP2; CBLL1; CCNK; CCR4; CD82; CDK1; CDK12; CDK2AP1; CDK6; CDV3; CEBPB; CELF1; CHAF1B; CKAP2; CRTC2; DDX10; DHCR24; DLG1; DUSP12; EBP; EIF4EBP1; EIF4ENIF1; ELP5; ETV6; FAM162A; FANCD2; FAR1; FUBP1; GALT; GRIPAP1; HCCS; HDAC3; HLA-DRB1; HPDL; ISY1; KDM3B; KIF23; LEMD2; LPGAT1; MAN2A1; MIER1; MMP14; …
Skin	225	7292	50.6757	1.27157	1.92769e-06	0.00163468	3.13884e-05	0.000122927	ABCC1; ABCD3; ANKHD1; ASAP2; ATM; AUP1; AURKB; BCL2; C1orf112; C21orf59; C9orf78; CAAP1; CASP2; CBLL1; CCR4; CD82; CDK1; CDK12; CDK6; CDV3; CEBPB; CELF1; CHAF1B; CKAP2; CRTC2; DDX10; DES; DLG1; EIF4EBP1; EIF4ENIF1; ELP5; ETV6; FAM162A; FANCD2; FAR1; FUBP1; GALT; GRIPAP1; HCCS; HPDL; ISY1; KDM3B; KIF1BP; KIF23; LEMD2; LPGAT1; MMP14; MORF4L1; MRPL2; MRPL24; NDEL1; NMD3; NTMT1; ORC4; PHF14; PLCB3; P…
Endometrium	56	1202	12.6126	1.92019	1.96178e-06	0.00166359	3.13884e-05	0.000122927	ATM; BCL2; CASP2; CDK1; CDK6; CEBPB; DES; EIF4EBP1; EIF4ENIF1; GRIPAP1; HCCS; PHF14; POLA1; PRKCA; RAC1; RB1; SYNJ2BP; WDHD1; ZFP36L1; ADA; KRT19; LGMN; LRP1; ABHD4; CCNA2; CUL3; GPHN; NBN; S100A2; KRT5; KRT18; ALB; KRT8; KRT4; TYMS; CTSH; JUP; F13A1; MCM2; TOP2A; CDK2; LGALS3; NPC2; KRT1; PCNA; FASN; MCM5; CTSB; CTSS; CD14; SLC2A3; ANXA1; SEPT3; STK38; ITGAM; NAGA;
A549	49	997	11.036	2.02569	2.10444e-06	0.00178456	3.30474e-05	0.000129424	ABCD3; AUP1; C21orf59; CEBPB; CLUH; COG4; DHX29; DHX36; EIF4EBP1; FUBP1; HN1; MRPL47; NOB1; PDK3; SEC24B; SMC2; SOAT1; VAMP3; VAMP7; ZCCHC6; KRT6A; KRT19; BTNL2; CLPB; CUL3; GPHN; NEDD9; RPS15A; TUBAL3; KRT18; DAB2; RRM1; KRT8; DUT; KPNA2; F13A1; MCM3; MCM4; MCM2; KRT14; SCD; FASN; RBM3; HMGCS1; HN1L; MTHFD2; MRC1; PCNP; MRPS9;
Skin cancer	218	7029	49.0991	1.27811	2.32374e-06	0.00197053	3.58278e-05	0.000140313	ABCC1; ABCD3; ANKHD1; ASAP2; ATM; AUP1; AURKB; BCL2L1; BRI3BP; C1orf112; C21orf59; C9orf78; CAAP1; CASP2; CBLL1; CD82; CDK1; CDK12; CDK2AP1; CDK6; CDV3; CEBPB; CELF1; CHAF1B; CKAP2; CRTC2; DDX10; DLG1; EBP; EIF4EBP1; EIF4ENIF1; ELP5; ETV6; FAM162A; FANCD2; FAR1; FUBP1; GALT; GBP6; GRIPAP1; HCCS; HDAC3; HLA-DRB1; HPDL; ISY1; KDM3B; KIF23; LEMD2; LPGAT1; MAN2A1; MIER1; MMP14; MRPL2; MRPL24; NDEL1; …
Ovarian cancer	233	7644	52.4775	1.25615	2.73967e-06	0.00232324	4.14864e-05	0.000162474	ABCC1; ABCD3; ANKHD1; ASAP2; ATM; AUP1; AURKB; BCL2; BCL2L1; BRI3BP; C1orf112; C21orf59; C9orf78; CAAP1; CASP2; CBLL1; CCNK; CCR4; CD82; CDK1; CDK12; CDK2AP1; CDK6; CDV3; CEBPB; CELF1; CHAF1B; CKAP2; CRTC2; DDX10; DHCR24; DLG1; DUSP12; EIF4EBP1; EIF4ENIF1; ELP5; ETV6; FAM162A; FANCD2; FAR1; FUBP1; GALT; GBP6; GRIPAP1; HCCS; HDAC3; HLA-DRB1; HPDL; ISY1; KDM3B; KIF1BP; KIF23; LEMD2; LPGAT1; MAN2A1;…
Cervical cancer	227	7426	51.1261	1.25973	3.5703e-06	0.00302762	5.31161e-05	0.000208019	ABCC1; ABCD3; ANKHD1; ASAP2; ATM; AUP1; AURKB; BCL2; BRI3BP; C1orf112; C21orf59; C9orf78; CAAP1; CASP2; CBLL1; CCR4; CD82; CDK1; CDK12; CDK2AP1; CDK6; CDV3; CEBPB; CELF1; CHAF1B; CKAP2; CRTC2; DDX10; DLG1; DUSP12; EIF4EBP1; EIF4ENIF1; ELP5; ETV6; FAM162A; FANCD2; FAR1; FUBP1; GALT; GBP6; GRIPAP1; HCCS; HDAC3; HLA-DRB1; HPDL; ISY1; KDM3B; KIF1BP; KIF23; LEMD2; LPGAT1; MAN2A1; MIER1; MMP14; MRPL2; …
Tonsils	223	7274	50.2252	1.26339	3.91902e-06	0.00332333	5.67789e-05	0.000222364	ABCC1; ABCD3; ANKHD1; ASAP2; ATM; AUP1; AURKB; BCL2; BCL2L1; BRI3BP; C1orf112; C21orf59; C9orf78; CAAP1; CASP2; CBLL1; CCR4; CD69; CD82; CDK1; CDK12; CDK6; CDV3; CEBPB; CELF1; CHAF1B; CHEK1; CKAP2; CRTC2; DDX10; DLG1; DUSP12; EBP; EIF4EBP1; EIF4ENIF1; ELP5; ETV6; FAM162A; FANCD2; FAR1; FUBP1; GALT; GBP6; GRIPAP1; HCCS; HLA-DRB1; HPDL; ISY1; KDM3B; KIF23; LAG3; LEMD2; MAN2A1; MIER1; MMP14; MRPL2; …
Lung cancer	227	7435	51.1261	1.2582	3.95042e-06	0.00334995	5.67789e-05	0.000222364	ABCC1; ABCD3; ANKHD1; ASAP2; ATM; AUP1; AURKB; BCL2; BCL2L1; BRI3BP; C1orf112; C21orf59; C9orf78; CAAP1; CASP2; CBLL1; CCNK; CCR4; CDK1; CDK12; CDK2AP1; CDK6; CDV3; CEBPB; CELF1; CHAF1B; CKAP2; CRTC2; DDX10; DHCR24; DLG1; DUSP12; EIF4EBP1; EIF4ENIF1; ELP5; ETV6; FAM162A; FANCD2; FAR1; FUBP1; GALT; GBP6; GRIPAP1; HCCS; HDAC3; HLA-DRB1; HPDL; ISY1; KDM3B; KIF1BP; KIF23; LEMD2; LPGAT1; MAN2A1; MIER1…
CD4	77	1901	17.3423	1.66936	4.42759e-06	0.00375459	6.25766e-05	0.00024507	BCL2; BRI3BP; CDC42SE2; CDV3; DDX18; EBP; FUBP1; GALT; HLA-DRB1; HN1; IMP3; MMAB; MYL12B; PRKCA; PSMD5; RAC1; SEC24B; TMEM70; TOMM40; VAMP7; KRT6A; ACAD9; DSG1; GGH; KRT19; MAVS; PRTN3; TSTD1; ITIH2; PLP2; PTPRJ; RPS15A; AP1S2; KRT5; KRT82; NAAA; ALB; RRM1; CTSZ; DUT; KRT77; AZU1; CTSH; FLG2; RPL38; KRT10; IFI30; ACSL4; UBAP2L; F13A1; ELANE; KRT14; HBD; CTSA; CTSC; KRT1; PCNA; FASN; CA2; CAMP; RB…
Testis	295	10269	66.4414	1.18385	4.55647e-06	0.00386389	6.27264e-05	0.000245656	ABCC1; ABCD3; ANKHD1; ARID2; ASAP2; ATM; AUP1; AURKB; BRI3BP; C1orf112; C21orf59; C9orf78; CAAP1; CASP2; CBLL1; CCNK; CCR4; CD82; CDK1; CDK12; CDK13; CDK2AP1; CDK6; CDV3; CEBPB; CELF1; CHAF1B; CHEK1; CKAP2; CLK3; COG4; CRTC2; CYP51A1; DDX10; DDX19B; DES; DHCR24; DHX36; DLG1; DUSP12; EBP; EIF4EBP1; EIF4ENIF1; ELP5; ETV6; FAM162A; FAM98A; FANCD2; FANCI; FAR1; FBXO7; FBXW11; FUBP1; GALT; GBP6; GRIPA…
Testis cancer	222	7248	50	1.26224	4.58613e-06	0.00388904	6.27264e-05	0.000245656	ABCC1; ABCD3; ANKHD1; ASAP2; ATM; AUP1; AURKB; BRI3BP; C1orf112; C21orf59; C9orf78; CAAP1; CASP2; CBLL1; CCR4; CD82; CDK1; CDK12; CDK2AP1; CDK6; CDV3; CEBPB; CELF1; CHAF1B; CKAP2; CRTC2; DDX10; DLG1; DUSP12; EBP; EIF4EBP1; EIF4ENIF1; ELP5; ETV6; FAM162A; FANCD2; FAR1; FUBP1; GALT; GRIPAP1; HCCS; HDAC3; HLA-DRB1; HPDL; ISY1; KDM3B; KIF1BP; KIF23; LEMD2; LPGAT1; MAN2A1; MIER1; MMP14; MRPL2; MRPL24;…
Liver cancer	233	7697	52.4775	1.2475	4.95347e-06	0.00420054	6.60053e-05	0.000258497	ABCC1; ABCD3; ANKHD1; ASAP2; ATM; AUP1; AURKB; BCL2L1; BRI3BP; C1orf112; C21orf59; C9orf78; CAAP1; CASP2; CBLL1; CCR4; CD82; CDK1; CDK12; CDK2AP1; CDK6; CDV3; CEBPB; CELF1; CHAF1B; CKAP2; CRTC2; DDX10; DHCR24; DLG1; DUSP12; EBP; EIF4EBP1; EIF4ENIF1; ELP5; ETV6; FAM162A; FANCD2; FAR1; FUBP1; GALT; GBP6; GRIPAP1; HCCS; HDAC3; HLA-DRB1; HPDL; ISY1; KDM3B; KIF1BP; KIF23; LEMD2; LPGAT1; MAN2A1; MIER1;…
Esophagus	191	6034	43.018	1.30448	4.98153e-06	0.00422434	6.60053e-05	0.000258497	ABCD3; ANKHD1; ASAP2; ATM; AURKB; BCL2; BRI3BP; C1orf112; C21orf59; C9orf78; CAAP1; CASP2; CBLL1; CCR4; CD82; CDK1; CDK12; CDK6; CDV3; CEBPB; CELF1; CHAF1B; CKAP2; CRTC2; DHCR24; DLG1; EIF4EBP1; EIF4ENIF1; ELP5; ETV6; FAM162A; FANCD2; FAR1; FUBP1; GALT; GBP6; GRIPAP1; HCCS; HPDL; ISY1; KDM3B; KIF1BP; KIF23; LEMD2; LPGAT1; MAN2A1; MIER1; MMP14; MRPL2; MRPL24; NDEL1; NTMT1; NUFIP2; ORC4; OXA1L; PHF…
Head & neck cancer	217	7062	48.8739	1.26631	5.33203e-06	0.00452156	6.95624e-05	0.000272428	ABCC1; ABCD3; ANKHD1; ASAP2; ATM; AUP1; AURKB; BRI3BP; C1orf112; C21orf59; C9orf78; CAAP1; CASP2; CBLL1; CCR4; CD82; CDK1; CDK12; CDK2AP1; CDK6; CDV3; CEBPB; CELF1; CHAF1B; CKAP2; CRTC2; DDX10; DLG1; DUSP12; EIF4EBP1; EIF4ENIF1; ELP5; ETV6; FAM162A; FANCD2; FAR1; FUBP1; GALT; GBP6; GRIPAP1; HCCS; HDAC3; ISY1; KDM3B; KIF23; LEMD2; LPGAT1; MAN2A1; MIER1; MMP14; MRPL2; MRPL24; NDEL1; NTMT1; NUFIP2; …
Dendritic cells	78	1954	17.5676	1.64517	6.49558e-06	0.00550825	8.29121e-05	0.00032471	ARID2; CDV3; COX6A1; FAM162A; FUBP1; GRIPAP1; GRSF1; HCCS; HLA-DRB1; HN1; KIF1BP; LIMS1; MRPS21; MYO9B; PFN2; PLCB3; RAC1; RANBP6; SEC24B; TOMM40; USP8; ZMYND8; BLOC1S1; CPT1A; CST7; FGR; GAA; IFIT1; SERPINB2; TSTD1; PLP2; PMVK; PTPRJ; RPS15A; NAAA; CTSZ; DUT; CTSH; ADAMTSL4; RPL38; IFI30; SLC16A3; RNASET2; UBAP2L; F13A1; RNASE6; ALOX15; MSRA; LGALS3; HEXB; NPC2; CTSA; CTSC; FASN; CA2; RBM3; HNMT…
17_wcx	62	1438	13.964	1.777	6.55084e-06	0.00555511	8.29121e-05	0.00032471	ATM; CDK12; DDX19B; DHCR24; FTSJ3; FUBP1; HLA-DRB1; KIFC1; MAN2A1; MYL12B; PFN2; PHAX; PSAT1; PYCR1; REXO4; RIF1; SHOC2; STX5; TEX264; TOMM40; KRT6A; ACAD9; DSG1; DTX3L; LGMN; CLPB; DHCR7; FNBP4; ITIH2; NBN; KRT5; KRT18; ALB; CTSZ; KRT8; DUT; KRT4; CTSH; KRT10; NPM3; JUP; RNASET2; MCM3; MCM4; PBK; MCM2; AK4; KRT14; HEXB; HBD; NPC2; KRT1; PCNA; FASN; MCM5; TRMT10C; BRE; PPIF; CTSB; HN1L; MTHFD2; C…
Melanoma	74	1826	16.6667	1.67022	6.92862e-06	0.00587547	8.6404e-05	0.000338385	CAAP1; DES; FAM162A; FUBP1; HIGD1A; HLA-DRB1; NDUFAF3; NUFIP2; PFN2; PHF14; PRKCA; PSAT1; PSMD5; RAC1; SRBD1; VAMP7; KRT6A; ACAD9; ARSA; FGR; FUCA2; GAA; GGH; KRT13; LGMN; LRP1; SERPINB2; VAV2; PMVK; RPS15A; VWA9; KRT5; KRT3; DAB2; ALB; RRM1; CTSZ; DUT; CTSH; FLG2; RPL38; KRT10; JUP; RNASET2; UBAP2L; F13A1; FUCA1; MCM3; KRT14; LGALS3; SELENBP1; HEXB; HBD; CTSA; CTSC; KRT1; PCNA; FASN; CA2; RBM3; …
Ovary	254	8592	57.2072	1.21827	7.46572e-06	0.00633093	9.17526e-05	0.000359332	ABCC1; ABCD3; ANKHD1; ARID2; ASAP2; ATM; AUP1; BCL2; BORA; BRI3BP; C1orf112; C21orf59; C9orf78; CAAP1; CASP2; CBLL1; CCNK; CD82; CDK1; CDK12; CDK13; CDK2AP1; CDK6; CDV3; CEBPB; CELF1; CHAF1B; CHEK1; CKAP2; CLUH; COX6A1; CRTC2; CYP51A1; DDX10; DDX18; DDX19B; DES; DLG1; DUSP12; EBP; EIF4EBP1; EIF4ENIF1; ELP5; FANCI; FBXW11; FUBP1; GALT; GRIPAP1; HCCS; HDAC3; HLA-DRB1; INTS2; IPO11; ISY1; KAT7; KDM3…
Endometrial cancer	226	7460	50.9009	1.24846	8.10582e-06	0.00687374	9.81963e-05	0.000384568	ABCC1; ABCD3; ANKHD1; ASAP2; ATM; AUP1; AURKB; BCL2; BRI3BP; C1orf112; C21orf59; C9orf78; CAAP1; CASP2; CBLL1; CCNK; CCR4; CD82; CDK1; CDK12; CDK2AP1; CDK6; CDV3; CEBPB; CELF1; CHAF1B; CKAP2; CRTC2; DDX10; DHCR24; DLG1; DUSP12; EBP; EIF4EBP1; EIF4ENIF1; ELP5; ETV6; FAR1; FUBP1; GALT; GRIPAP1; HCCS; HDAC3; HLA-DRB1; HPDL; ISY1; KDM3B; KIF23; LEMD2; LPGAT1; MAN2A1; MIER1; MMP14; MRPL2; MRPL24; NDEL…
Urinary bladder	215	7054	48.4234	1.25606	1.17205e-05	0.00993896	0.000139985	0.000548227	ABCC1; ABCD3; ANKHD1; ASAP2; ATM; AUP1; AURKB; BCL2; BRI3BP; C1orf112; C21orf59; C9orf78; CAAP1; CASP2; CBLL1; CCR4; CD82; CDK1; CDK12; CDK2AP1; CDK6; CDV3; CEBPB; CELF1; CHAF1B; CKAP2; CRTC2; DDX10; DHCR24; DLG1; DUSP12; EIF4EBP1; EIF4ENIF1; ELP5; ETV6; FAM162A; FANCD2; FAR1; FUBP1; GALT; GBP6; GRIPAP1; HCCS; HDAC3; ISY1; KDM3B; KIF23; LEMD2; LPGAT1; MAN2A1; MIER1; MMP14; MRPL2; MRPL24; NDEL1; N…
Malignant lymphoma	203	6586	45.7207	1.27023	1.27061e-05	0.0107748	0.00014965	0.000586076	ABCC1; ABCD3; ANKHD1; ASAP2; ATM; AUP1; AURKB; BCL2; BRI3BP; C1orf112; C21orf59; C9orf78; CAAP1; CASP2; CBLL1; CCR4; CD69; CD82; CDK1; CDK12; CDK2AP1; CDK6; CDV3; CEBPB; CELF1; CHAF1B; CKAP2; CRTC2; DDX10; DLG1; EIF4EBP1; EIF4ENIF1; ELP5; ETV6; FANCD2; FAR1; FUBP1; GALT; GRIPAP1; HCCS; HDAC3; HLA-DRB1; HPDL; ISY1; KDM3B; KIF23; LAG3; LEMD2; MAN2A1; MIER1; MRPL2; MRPL24; NTMT1; NUFIP2; ORC4; OXA1L…
Renal cancer	216	7121	48.6486	1.25003	1.56694e-05	0.0132877	0.000182023	0.00071286	ABCC1; ABCD3; ANKHD1; ASAP2; ATM; AUP1; AURKB; BCL2; BRI3BP; C1orf112; C21orf59; C9orf78; CAAP1; CASP2; CBLL1; CCR4; CD82; CDK1; CDK12; CDK2AP1; CDK6; CDV3; CEBPB; CELF1; CHAF1B; CKAP2; CRTC2; DDX10; DLG1; DUSP12; EIF4EBP1; EIF4ENIF1; ELP5; ETV6; FAM162A; FANCD2; FAR1; FUBP1; GALT; GBP6; GRIPAP1; HCCS; HDAC3; HLA-DRB1; HPDL; ISY1; KDM3B; KIF23; LEMD2; LPGAT1; MAN2A1; MIER1; MMP14; MRPL2; MRPL24; …
Appendix	213	7004	47.973	1.25326	1.61008e-05	0.0136535	0.000184506	0.000722585	ABCC1; ABCD3; ANKHD1; ASAP2; ATM; AUP1; AURKB; BRI3BP; C1orf112; C21orf59; C9orf78; CAAP1; CASP2; CBLL1; CD69; CD82; CDK1; CDK12; CDK2AP1; CDK6; CDV3; CEBPB; CELF1; CHAF1B; CKAP2; CRTC2; DDX10; DLG1; DUSP12; EIF4EBP1; EIF4ENIF1; ELP5; ETV6; FAM162A; FAR1; FUBP1; GALT; GRIPAP1; HCCS; HDAC3; HLA-DRB1; HPDL; ISY1; KDM3B; KIF23; LAG3; LEMD2; LPGAT1; MAN2A1; MIER1; MMP14; MRPL2; MRPL24; NDEL1; NMD3; N…
BT474	31	558	6.98198	2.29006	1.74282e-05	0.0147791	0.000197055	0.000771728	CDV3; FUBP1; HN1; LIN7C; MYL12B; PSMD5; GAA; GGH; KRT19; KRT18; ALB; CTSZ; KRT8; DUT; CTSH; KRT10; RNASET2; UBAP2L; KRT14; LGALS3; HBD; NPC2; KRT1; PCNA; FASN; RBM3; HN1L; ASAH1; HEXA; CSTB; PCNP;
Uterine cervix	43	902	9.68468	1.96492	1.92941e-05	0.0163614	0.000210186	0.000823155	ATM; CASP2; CDK1; CDK6; EIF4EBP1; EIF4ENIF1; ETV6; GRIPAP1; HCCS; OXA1L; PHF14; POLA1; RB1; SPIN3; WDHD1; ZFP36L1; ADA; KRT19; LGMN; CUL3; GPHN; NBN; S100A2; KRT5; KRT18; KRT8; KRT4; TYMS; CTSH; KRT10; JUP; MCM2; KRT14; TOP2A; LGALS3; KRT1; PCNA; CTSB; CTSS; SLC2A3; SEPT3; STK38; NAGA;
MicroProt2	31	561	6.98198	2.27782	1.93332e-05	0.0163945	0.000210186	0.000823155	MMP14; RFK; KRT6A; GGH; KRT13; KRT19; ITIH2; KRT5; KRT82; KRT79; ALB; KRT77; KRT4; CTSH; ADAMTSL4; KRT10; RNASET2; RNASE6; KRT14; HBD; NPC2; KRT1; FASN; CA2; CAMP; CTSB; CTSS; CA1; THY1; CD14; CSTB;
Colorectal cancer cells	31	561	6.98198	2.27782	1.93332e-05	0.0163945	0.000210186	0.000823155	BRI3BP; CD82; LIN7C; MAN1A1; RAC1; TNIK; VAMP3; KRT6A; CYSTM1; KRT13; KRT19; RPS15A; KRT75; KRT5; KRT79; ARVCF; KRT3; KRT18; ALB; KRT8; KRT77; KRT4; ASNS; KRT10; JUP; KRT14; LGALS3; KRT1; PCNA; FASN; ANXA1;
Colorectal cancer	225	7513	50.6757	1.23417	2.17306e-05	0.0184276	0.00023326	0.000913521	ABCC1; ABCD3; ANKHD1; ASAP2; ATM; AUP1; AURKB; BCL2L1; BRI3BP; C1orf112; C21orf59; C9orf78; CAAP1; CASP2; CBLL1; CCNK; CCR4; CDK1; CDK12; CDK2AP1; CDK6; CDV3; CEBPB; CELF1; CHAF1B; CKAP2; CRTC2; DDX10; DLG1; DUSP12; EBP; EIF4EBP1; EIF4ENIF1; ELP5; ETV6; FAM162A; FANCD2; FAR1; FUBP1; GALT; GRIPAP1; HCCS; HDAC3; HLA-DRB1; HPDL; ISY1; KDM3B; KIF1BP; KIF23; LEMD2; LPGAT1; MAN2A1; MIER1; MMP14; MRPL2;…
Thyroid cancer	219	7281	49.3243	1.23954	2.38354e-05	0.0202124	0.000252655	0.000989477	ABCC1; ABCD3; ANKHD1; ASAP2; ATM; AUP1; AURKB; BCL2; BCL2L1; BRI3BP; C1orf112; C21orf59; C9orf78; CAAP1; CASP2; CBLL1; CCR4; CDK1; CDK12; CDK2AP1; CDK6; CDV3; CEBPB; CELF1; CHAF1B; CKAP2; CRTC2; DDX10; DHCR24; DLG1; DUSP12; EIF4EBP1; EIF4ENIF1; ELP5; ETV6; FAM162A; FANCD2; FAR1; FUBP1; GALT; GRIPAP1; HCCS; HDAC3; HLA-DRB1; HPDL; ISY1; KDM3B; KIF1BP; KIF23; LEMD2; LPGAT1; MAN2A1; MIER1; MMP14; MRP…
Platelets	82	2168	18.4685	1.55881	2.65793e-05	0.0225393	0.000278262	0.00108976	ASAP2; AUP1; AURKB; BRI3BP; CCR4; CD69; CD82; DDX18; EIF4EBP1; FAM162A; HIGD1A; LIMS1; LPGAT1; MAN2A1; MYL12B; MYO9B; NOP14; NTMT1; PDK3; PRKCA; PSMD5; RAC1; SMC2; TEX264; TNIK; VAMP3; VAMP7; KRT6A; ACAD9; ARHGEF7; CPT1A; FGR; GGH; KRT13; LGMN; MAVS; RAP1GAP2; SYNE1; CD226; ELOVL1; ITIH2; MFF; PLP2; PMVK; PTPRJ; TUBAL3; AP1S2; P2RY12; KRT75; KRT5; KRT82; KRT36; ALB; DUT; KRT77; KRT4; KRT10; JUP; …
Prostate cancer	217	7214	48.8739	1.23963	2.72723e-05	0.0231269	0.000282036	0.00110454	ABCC1; ABCD3; ANKHD1; ASAP2; ATM; AUP1; AURKB; BCL2L1; BRI3BP; C1orf112; C21orf59; C9orf78; CAAP1; CASP2; CBLL1; CDK1; CDK12; CDK2AP1; CDK6; CDV3; CEBPB; CELF1; CHAF1B; CKAP2; CRTC2; DDX10; DLG1; DUSP12; EBP; EIF4EBP1; EIF4ENIF1; ELP5; ETV6; FAM162A; FANCD2; FAR1; FUBP1; GALT; GRIPAP1; HCCS; HDAC3; HPDL; ISY1; KDM3B; KIF23; LEMD2; LPGAT1; MAN2A1; MIER1; MMP14; MRPL2; MRPL24; NMD3; NTMT1; NUFIP2; …
Lung	283	9992	63.7387	1.16718	4.94954e-05	0.0419721	0.000505688	0.00198043	ABCC1; ABCD3; ANKHD1; ARID2; ASAP2; ATM; AUP1; AURKB; BCL2L1; BRI3BP; C1orf112; C21orf59; C9orf78; CAAP1; CASP2; CBLL1; CCNK; CCR4; CD82; CDK1; CDK12; CDK13; CDK2AP1; CDK6; CDV3; CEBPB; CELF1; CHAF1B; CKAP2; CRTC2; CYP51A1; DDX10; DLG1; DUSP12; EIF4EBP1; EIF4ENIF1; ELP5; ETV6; FAM162A; FANCD2; FANCI; FAR1; FBXO7; FBXW11; FUBP1; GALT; GRIPAP1; HCCS; HDAC3; HLA-DRB1; HPDL; INTS2; IPO11; ISY1; KAT7;…
Vulva/anal skin	194	6377	43.6937	1.2537	5.89206e-05	0.0499647	0.000594818	0.00232949	ABCC1; ABCD3; ANKHD1; ASAP2; ATM; AUP1; AURKB; BRI3BP; C1orf112; C21orf59; C9orf78; CAAP1; CASP2; CBLL1; CD82; CDK1; CDK12; CDK2AP1; CDK6; CDV3; CEBPB; CELF1; CHAF1B; CKAP2; CRTC2; DDX10; DHCR24; DLG1; EIF4EBP1; EIF4ENIF1; ELP5; FAM162A; FANCD2; FAR1; FUBP1; GALT; GBP6; GRIPAP1; HCCS; HPDL; ISY1; KDM3B; KIF1BP; KIF23; LEMD2; LPGAT1; MAN2A1; MIER1; MMP14; MRPL2; MRPL24; NDEL1; NMD3; NTMT1; NUFIP2;…
WM1158	16	212	3.6036	3.11188	6.36664e-05	0.0539891	0.000635166	0.00248751	DES; FUBP1; TMUB1; KRT6A; KRT13; KRT19; KRT5; KRT3; KRT18; KRT77; KRT10; JUP; KRT14; KRT1; FASN; ANXA1;
PC3(AR)6	18	262	4.05405	2.83259	7.70794e-05	0.0653634	0.000760039	0.00297655	ARSA; GAA; KRT19; LGMN; KRT75; KRT18; CTSZ; KRT8; KRT10; RNASET2; LGALS3; HEXB; NPC2; CTSA; CTSC; KRT1; PPT1; ANXA1;
HTB75	53	1277	11.9369	1.71061	8.91718e-05	0.0756177	0.000869169	0.00340394	CDV3; DLG1; FUBP1; GRSF1; LIMS1; MAN2A1; MYL12B; PAIP2; PFN2; TOMM34; TTC1; ARSA; FUCA2; GGH; KRT19; LGMN; MAVS; RPS15A; KRT18; ALB; CTSZ; KRT8; DUT; ADAMTSL4; RPL38; KRT10; KPNA2; RNASET2; MCM3; MCM4; AK4; LGALS3; HEXB; NPC2; CTSA; CTSC; KRT1; PCNA; FASN; RBM3; HMGCS1; PPIF; YBX1; CTSB; ASAH1; MTHFD2; PPT1; CREG1; HEXA; SLC2A3; ANXA1; CSTB; GALNS;
Malignant melanoma	220	7459	49.5495	1.21548	9.36105e-05	0.0793817	0.000902065	0.00353277	ABCC1; ABCD3; ANKHD1; ASAP2; ATM; AUP1; AURKB; BCL2; BCL2L1; BRI3BP; C1orf112; C21orf59; C9orf78; CAAP1; CASP2; CBLL1; CCR4; CD82; CDK1; CDK12; CDK2AP1; CDK6; CDV3; CEBPB; CELF1; CHAF1B; CHEK1; CKAP2; CRTC2; DDX10; DHCR24; DLG1; EBP; EIF4EBP1; EIF4ENIF1; ELP5; ETV6; FAM162A; FANCD2; FAR1; FUBP1; GALT; GRIPAP1; HCCS; HLA-DRB1; HPDL; ISY1; KDM3B; KIF23; LEMD2; LPGAT1; MAN2A1; MIER1; MMP14; MRPL2; M…
DU145	42	941	9.45946	1.83969	0.000107317	0.0910052	0.00102253	0.00400455	ABCC1; AUP1; CDC42SE2; DHX36; MAN2A1; MMP14; PLCB3; PRKCA; RAC1; VAMP3; VAMP7; CPT1A; DSG1; FUCA2; GAA; GGH; LGMN; LRP1; CSNK1G1; DHCR7; ELOVL1; PLP2; RPS15A; CTSZ; FLG2; ASNS; JUP; ACSL4; SLC16A3; FUCA1; MCM2; HEXB; NPC2; CTSA; PCNA; FASN; HMGCS1; CTSB; ASAH1; HEXA; ANXA1; TGM3;
Prostate	231	7923	52.027	1.20151	0.000112089	0.0950515	0.00105613	0.00413613	ABCC1; ABCD3; ANKHD1; ARID2; ASAP2; ATM; AUP1; BCL2; BCL2L1; BRI3BP; C1orf112; C21orf59; C9orf78; CAAP1; CASP2; CBLL1; CCNK; CD82; CDK1; CDK12; CDK2AP1; CDK6; CDV3; CEBPB; CELF1; CHAF1B; CHEK1; CKAP2; CLK3; CRTC2; CYP51A1; DDX10; DHCR24; DLG1; DUSP12; EBP; EIF4EBP1; EIF4ENIF1; ELP5; ETV6; FAM162A; FAR1; FBXW11; FUBP1; GALT; GBP6; GRIPAP1; HCCS; HDAC3; HN1; ISY1; KAT7; KDM3B; KIF1BP; KIF23; KIF4A;…
031003_BALF2	47	1102	10.5856	1.75789	0.000122091	0.103533	0.00113773	0.0044557	DES; DLG1; FAM98A; FUBP1; GALT; MYL12B; PFN2; PSAT1; SEC24B; ARSA; FUCA2; IFIT1; KRT19; LGMN; LRP1; MAVS; ITIH2; KRT18; ALB; CTSZ; KRT8; JUP; IFI30; ACSL4; RNASET2; F13A1; MCM4; HEXB; NPC2; CTSA; CTSC; KRT1; PCNA; FASN; HNMT; HMGCS1; YBX1; CTSB; PPT1; CREG1; GALM; HEXA; ANXA1; CSTB; FTL; PCNP; NAGA;
Malignant glioma	212	7169	47.7477	1.21867	0.000125777	0.106659	0.00115795	0.00453488	ABCC1; ABCD3; ANKHD1; ASAP2; ATM; AUP1; AURKB; BCL2L1; BRI3BP; C1orf112; C21orf59; C9orf78; CAAP1; CASP2; CBLL1; CDK1; CDK12; CDK2AP1; CDK6; CDV3; CEBPB; CELF1; CHAF1B; CKAP2; CRTC2; DDX10; DLG1; DUSP12; EIF4EBP1; EIF4ENIF1; ELP5; ETV6; FAM162A; FANCD2; FAR1; FUBP1; GALT; GRIPAP1; HCCS; HDAC3; HPDL; ISY1; KDM3B; KIF1BP; KIF23; LEMD2; LPGAT1; MAN2A1; MIER1; MMP14; MRPL2; MRPL24; NTMT1; NUFIP2; ORC…
Epididymis	210	7090	47.2973	1.22062	0.000126992	0.107689	0.00115795	0.00453488	ABCC1; ABCD3; ANKHD1; ASAP2; ATM; AUP1; BCL2; BRI3BP; C1orf112; C21orf59; C9orf78; CAAP1; CASP2; CBLL1; CCR4; CD82; CDK1; CDK12; CDK2AP1; CDK6; CDV3; CEBPB; CELF1; CHAF1B; CKAP2; CRTC2; DDX10; DLG1; DUSP12; EIF4EBP1; EIF4ENIF1; ELP5; ETV6; FAM162A; FANCD2; FAR1; FUBP1; GALT; GRIPAP1; HCCS; HDAC3; HPDL; ISY1; KDM3B; KIF23; LEMD2; LPGAT1; MAN2A1; MIER1; MMP14; MRPL2; MRPL24; NDEL1; NMD3; NTMT1; NUF…
Seminal vesicle	198	6620	44.5946	1.23258	0.000136415	0.11568	0.00123064	0.00481957	ABCD3; ANKHD1; ASAP2; ATM; AUP1; AURKB; BCL2; BRI3BP; C1orf112; C21orf59; C9orf78; CAAP1; CASP2; CBLL1; CCR4; CDK12; CDK6; CDV3; CEBPB; CELF1; CHAF1B; CHEK1; CKAP2; CRTC2; DHCR24; DLG1; DUSP12; EIF4EBP1; EIF4ENIF1; ELP5; ETV6; FANCD2; FAR1; FUBP1; GALT; GBP6; GRIPAP1; HCCS; HDAC3; HPDL; ISY1; KDM3B; KIF23; LEMD2; LPGAT1; MAN2A1; MIER1; MMP14; MRPL2; MRPL24; NTMT1; NUFIP2; ORC4; OXA1L; PHF14; PLCB…
Nasopharynx	205	6904	46.1712	1.22366	0.000144309	0.122374	0.00128815	0.0050448	ABCC1; ABCD3; ANKHD1; ASAP2; AUP1; BCL2; BCL2L1; BRI3BP; C1orf112; C21orf59; C9orf78; CAAP1; CASP2; CBLL1; CD82; CDK1; CDK12; CDK2AP1; CDK6; CDV3; CEBPB; CELF1; CHAF1B; CKAP2; CRTC2; DDX10; DHCR24; DLG1; DUSP12; EIF4EBP1; EIF4ENIF1; ELP5; ETV6; FAR1; FUBP1; GALT; GRIPAP1; HCCS; HPDL; ISY1; KDM3B; KIF1BP; KIF23; LEMD2; LPGAT1; MAN2A1; MIER1; MMP14; MRPL2; MRPL24; NDEL1; NMD3; NTMT1; NUFIP2; ORC4; …
TOV112D	52	1276	11.7117	1.67966	0.000164321	0.139345	0.00145151	0.00568455	CDK1; CDV3; DDX19B; DHX36; FUBP1; HN1; LIMS1; MAN2A1; PFN2; PSAT1; PSMD5; SEC24B; TTC1; KRT6A; FUCA2; GGH; KRT19; KRT18; ALB; CTSZ; KRT8; DUT; CTSH; ASNS; RPL38; NPM3; KPNA2; RNASET2; UBAP2L; MCM3; MCM4; MCM2; KRT14; LGALS3; HEXB; HBD; NPC2; CTSC; KRT1; PCNA; FASN; RBM3; HMGCS1; PPIF; CTSB; HN1L; ASAH1; PPT1; HEXA; ANXA1; CSTB; PCNP;
Vulva	38	838	8.55856	1.86912	0.000167568	0.142098	0.00146492	0.0057371	ATM; CASP2; CD82; CDK1; CDK6; EIF4EBP1; EIF4ENIF1; GRIPAP1; HCCS; OXA1L; PHF14; POLA1; RB1; WDHD1; ZFP36L1; KRT19; LGMN; CCNA2; CUL3; GPHN; NBN; S100A2; KRT5; KRT4; TYMS; KRT10; JUP; MCM2; KRT14; TOP2A; LGALS3; NPC2; KRT1; PCNA; MCM5; CD14; CSTB; STK38;
MCF10A	32	661	7.20721	1.99556	0.000174568	0.148034	0.00151055	0.00591578	ARPP19; CDV3; FUBP1; HN1; LIN7C; MYL12B; TTC1; KRT6A; ADA; GGH; MAVS; CEP170; S100A2; KRT5; CTSZ; DUT; KRT10; UBAP2L; KRT14; LGALS3; NPC2; CTSC; KRT1; RBM3; PPIF; YBX1; CTSB; HN1L; CREG1; ANXA1; CSTB; PCNP;
Lymph nodes	199	6700	44.8198	1.22402	0.000199599	0.16926	0.00170969	0.00669569	ABCC1; ABCD3; ANKHD1; ASAP2; ATM; AUP1; AURKB; BCL2; BRI3BP; C1orf112; C21orf59; C9orf78; CAAP1; CASP2; CBLL1; CCR4; CDK1; CDK12; CDK6; CDV3; CEBPB; CELF1; CHAF1B; CKAP2; CRTC2; DDX10; DLG1; EHMT2; EIF4EBP1; EIF4ENIF1; ELP5; ETV6; FAR1; FUBP1; GALT; GRIPAP1; HCCS; HDAC3; HLA-DRB1; HPDL; ISY1; KDM3B; KIF23; KIF4A; KLF13; LAG3; LEMD2; LPGAT1; MAN2A1; MIER1; MRPL2; MRPL24; NMD3; NTMT1; NUFIP2; ORC4;…
HPDE6	23	414	5.18018	2.2903	0.000211719	0.179538	0.00179538	0.00703126	PFN2; FUCA2; GAA; GGH; LGMN; SERPINB2; CTSZ; DUT; CTSH; HEXB; NPC2; CTSA; CTSC; PCNA; FASN; CA2; PPIF; CTSB; PPT1; HEXA; ANXA1; CSTB; SMPDL3A;
PC3	52	1294	11.7117	1.65629	0.000231089	0.195963	0.00193692	0.0075856	ARPP19; CDV3; HN1; KIF23; KIF4A; LIN7C; MAN1A1; MYL12B; PFN2; RAC1; TOMM34; TTC1; GAA; GGH; KRT13; KRT19; LGMN; CHST11; TUBAL3; KRT18; CTSZ; KRT8; KRT4; CTSH; JUP; ACSL4; KPNA2; RNASET2; UBAP2L; FUCA1; LGALS3; HEXB; NPC2; CTSA; CTSC; KRT1; PCNA; FASN; RBM3; PPIF; YBX1; CTSB; ASAH1; PPT1; CREG1; ANXA1; CSTB; CD320; GALNS; SMPDL3A; PCNP; NAGA;
Fallopian tubes	198	6677	44.5946	1.22206	0.000232979	0.197566	0.00193692	0.0075856	ABCC1; ABCD3; ANKHD1; ASAP2; ATM; AUP1; BCL2; BRI3BP; C1orf112; C21orf59; C9orf78; CAAP1; CASP2; CBLL1; CD82; CDK1; CDK12; CDK2AP1; CDK6; CDV3; CEBPB; CELF1; CHAF1B; CKAP2; CRTC2; DDX10; DLG1; DUSP12; EBP; EIF4EBP1; EIF4ENIF1; ELP5; FAR1; FUBP1; GALT; GRIPAP1; HCCS; HLA-DRB1; HPDL; ISY1; KDM3B; KIF23; LEMD2; LPGAT1; MAN2A1; MIER1; MMP14; MRPL2; MRPL24; NMD3; NUFIP2; ORC4; OXA1L; PHF14; PLCB3; POL…
Spleen	228	7887	51.3514	1.19132	0.000244456	0.207298	0.00199663	0.00781944	ANKHD1; ARID2; ASAP2; ATM; AUP1; AURKB; BCL2; BRI3BP; C1orf112; C9orf78; CAAP1; CASP2; CBLL1; CCNK; CCR4; CD82; CDK1; CDK12; CDK13; CDK2AP1; CDK6; CDV3; CEBPB; CELF1; CHAF1B; CHEK1; CKAP2; CRTC2; CYP51A1; DDX10; DLG1; DUSP12; EHMT2; EIF4EBP1; EIF4ENIF1; ELP5; ETV6; FANCD2; FANCI; FAR1; FBXW11; FUBP1; GALT; GRIPAP1; HCCS; HDAC3; HLA-DRB1; ISY1; KAT7; KDM3B; KIF1BP; KIF23; KIF4A; LARP4B; LEMD2; LIM…
Malignant carcinoid	208	7081	46.8468	1.21053	0.00024487	0.20765	0.00199663	0.00781944	ABCC1; ABCD3; ANKHD1; ASAP2; ATM; AUP1; AURKB; BRI3BP; C1orf112; C21orf59; C9orf78; CAAP1; CASP2; CBLL1; CCR4; CD82; CDK1; CDK12; CDK6; CDV3; CEBPB; CELF1; CHAF1B; CKAP2; CRTC2; DDX10; DHCR24; DLG1; DUSP12; EIF4EBP1; EIF4ENIF1; ELP5; ETV6; FANCD2; FAR1; FUBP1; GALT; GRIPAP1; HCCS; HDAC3; HPDL; ISY1; KDM3B; KIF23; LEMD2; LPGAT1; MAN2A1; MIER1; MMP14; MRPL2; MRPL24; NDEL1; NMD3; NTMT1; NUFIP2; ORC4…
Colon	241	8429	54.2793	1.17827	0.000270431	0.229325	0.00218405	0.00855343	ABCC1; ABCD3; ANKHD1; ARID2; ASAP2; ATM; AUP1; AURKB; BRI3BP; C1orf112; C21orf59; C9orf78; CAAP1; CASP2; CBLL1; CCNK; CD82; CDK1; CDK12; CDK13; CDK2AP1; CDK6; CDV3; CEBPB; CELF1; CHAF1B; CHEK1; CKAP2; CRTC2; CYP51A1; DDX10; DLG1; DUSP12; EBP; EIF4EBP1; EIF4ENIF1; ELP5; FAM162A; FANCD2; FAR1; FBXW11; FUBP1; GALT; GRIPAP1; HCCS; HDAC3; HN1; HPDL; ISY1; KAT7; KDM3B; KIF1BP; KIF23; KIF4A; LARP4B; LEM…
HUVEC	349	13061	78.6036	1.10116	0.000289516	0.245509	0.00231613	0.00907068	ABCB8; ABCC1; ABCD3; ANAPC4; ANKHD1; ARID2; ARPP19; ASAP2; ATM; AUP1; AURKB; BCL2; BCL2L1; BORA; C1orf112; C21orf59; C9orf78; CAAP1; CASP2; CBLL1; CCNK; CD69; CD82; CDK12; CDK13; CDK6; CDV3; CEBPB; CELF1; CEND1; CENPH; CENPK; CHAF1B; CHEK1; CHTF18; CKAP2; CLK3; CLUH; COG4; CRTC2; CYP51A1; DAPL1; DCAF13; DDX10; DDX18; DDX31; DHCR24; DHX29; DHX36; DLG1; DLGAP4; DPCD; DPH5; DSCC1; DUS3L; DUSP12; EHM…
Ubiquitous	44	1052	9.90991	1.72393	0.000309008	0.262039	0.00244896	0.00959091	ABCB8; AUP1; CCNK; CDK12; CDK13; COX6A1; DDX19B; EHMT2; F8A1; FBXW11; KIF1BP; MIER1; NOP14; PFN2; PRCC; RAC1; RIF1; RSRC2; SOAT1; STK17A; TNIK; TTC1; TTC4; TUBGCP4; WDR76; ACAD9; ADA; GGH; POLR2J; VAV2; DGCR8; GPHN; NEDD9; RCL1; RFX1; KPNA2; RNASET2; MCM3; MCM2; MSRA; NPC2; SKAP2; CTSB; PPT1;
Rectum	208	7113	46.8468	1.20509	0.000326165	0.276588	0.002561	0.0100297	ABCC1; ABCD3; ANKHD1; ASAP2; ATM; AUP1; AURKB; BCL2L1; BRI3BP; C1orf112; C21orf59; C9orf78; CAAP1; CASP2; CBLL1; CCR4; CDK1; CDK12; CDK2AP1; CDK6; CDV3; CEBPB; CELF1; CHAF1B; CKAP2; CRTC2; DDX10; DLG1; DUSP12; EBP; EIF4EBP1; EIF4ENIF1; ELP5; FAM162A; FANCD2; FAR1; FUBP1; GALT; GRIPAP1; HCCS; HDAC3; HPDL; ISY1; KDM3B; KIF23; LEMD2; LPGAT1; MAN2A1; MIER1; MMP14; MRPL2; MRPL24; NDEL1; NMD3; NTMT1; N…
Stomach	231	8044	52.027	1.18344	0.000332044	0.281574	0.00258324	0.0101168	ABCC1; ABCD3; ANKHD1; ASAP2; ATM; AUP1; AURKB; BCL2L1; BRI3BP; C1orf112; C21orf59; C9orf78; CAAP1; CASP2; CBLL1; CCNK; CCR4; CD82; CDK1; CDK12; CDK2AP1; CDK6; CDV3; CEBPB; CELF1; CHAF1B; CKAP2; CRTC2; DDX10; DLG1; DUSP12; EBP; EIF4EBP1; EIF4ENIF1; ELP5; ETV6; FAM162A; FANCD2; FAR1; FUBP1; GALT; GRIPAP1; HCCS; HDAC3; HPDL; ISY1; KDM3B; KIF23; KIF4A; KLF13; LEMD2; LPGAT1; MAN2A1; MIER1; MMP14; MRPL…
Cervix, uterine	189	6391	42.5676	1.21872	0.000441648	0.374517	0.0034047	0.0133339	ABCD3; ANKHD1; ASAP2; ATM; AUP1; C1orf112; C21orf59; C9orf78; CAAP1; CASP2; CBLL1; CD82; CDK1; CDK12; CDK2AP1; CDK6; CDV3; CEBPB; CELF1; CHAF1B; CKAP2; CRTC2; DDX10; DLG1; DUSP12; EIF4EBP1; EIF4ENIF1; ELP5; ETV6; FAM162A; FAR1; FUBP1; GALT; GBP6; GRIPAP1; HCCS; HPDL; ISY1; KDM3B; KIF23; LEMD2; MAN2A1; MIER1; MMP14; MRPL2; MRPL24; NDEL1; NTMT1; NUFIP2; ORC4; OXA1L; PHF14; PLCB3; POLA1; PRCC; PRKCA…
Duodenum	211	7275	47.5225	1.19524	0.00046909	0.397788	0.00358368	0.0140348	ABCC1; ABCD3; ANKHD1; ASAP2; ATM; AUP1; AURKB; BRI3BP; C1orf112; C21orf59; C9orf78; CAAP1; CASP2; CBLL1; CCNK; CCR4; CD82; CDK1; CDK12; CDK2AP1; CDK6; CDV3; CEBPB; CELF1; CHAF1B; CKAP2; CRTC2; DDX10; DLG1; DUSP12; EBP; EIF4EBP1; EIF4ENIF1; ELP5; FANCD2; FAR1; FUBP1; GALT; GRIPAP1; HCCS; HDAC3; HPDL; ISY1; KDM3B; KIF23; LEMD2; LPGAT1; MAN2A1; MIER1; MMP14; MRPL2; MRPL24; NDEL1; NMD3; NTMT1; NUFIP2…
Salivary glands	194	6607	43.6937	1.21006	0.000516916	0.438345	0.0039138	0.0153277	ABCC1; ABCD3; ANKHD1; ASAP2; ATM; AUP1; BRI3BP; C1orf112; C21orf59; C9orf78; CAAP1; CASP2; CBLL1; CCR4; CD82; CDK12; CDK2AP1; CDK6; CDV3; CEBPB; CELF1; CHAF1B; CKAP2; CRTC2; DDX10; DHCR24; DLG1; DUSP12; EIF4EBP1; EIF4ENIF1; ELP5; ETV6; FAR1; FUBP1; GALT; GRIPAP1; HCCS; HLA-DRB1; HPDL; ISY1; KDM3B; KIF1BP; KIF23; KIF4A; LEMD2; MAN2A1; MIER1; MRPL2; MRPL24; NDEL1; NMD3; NTMT1; NUFIP2; ORC4; OXA1L; …
Thyroid	38	889	8.55856	1.76189	0.000530706	0.450038	0.00398264	0.0155973	ATM; BCL2; CASP2; CDK6; EIF4ENIF1; ETV6; GRIPAP1; HCCS; OXA1L; PHF14; PRKCA; RB1; SYNJ2BP; ZFP36L1; ADA; KRT19; LGMN; ABHD4; CUL3; GPHN; NBN; MYO5C; S100A2; KRT18; KRT8; TYMS; CEP128; JUP; LGALS3; NPC2; PCNA; CTSB; CTSS; CD14; CSTB; SEPT3; STK38; NAGA;
Breast	189	6413	42.5676	1.21454	0.000536475	0.454931	0.00399062	0.0156285	ABCC1; ABCD3; ANKHD1; ASAP2; ATM; AUP1; AURKB; BCL2; BRI3BP; C1orf112; C21orf59; C9orf78; CAAP1; CASP2; CBLL1; CCR4; CDK1; CDK12; CDK2AP1; CDK6; CDV3; CEBPB; CELF1; CHAF1B; CKAP2; CRTC2; DDX10; DLG1; DUSP12; EIF4EBP1; EIF4ENIF1; ELP5; ETV6; FAR1; FUBP1; GALT; GRIPAP1; HCCS; HDAC3; HPDL; ISY1; KDM3B; KIF23; LEMD2; MAN2A1; MMP14; MRPL2; MRPL24; NDEL1; NTMT1; NUFIP2; ORC4; PHF14; PLCB3; POLA1; PRCC;…
NB4	32	711	7.20721	1.85523	0.000621351	0.526905	0.00458179	0.0179437	ABCC1; AUP1; CD82; DDX18; FAM162A; MRPS18B; OXA1L; TIMM22; CPT1A; LRP1; CHST11; DHCR7; ELOVL1; PLP2; PTPRJ; TUBAL3; FCGR2B; ALB; AZU1; CTSH; ACSL4; MCM2; CTSA; CTSC; FASN; MCM5; TRMT10C; PPIF; YBX1; SEMA4A; CD320; ITGAM;
19_proteinag	9	98	2.02703	3.78828	0.000628354	0.532844	0.00459348	0.0179895	ITIH2; KRT5; ALB; KRT77; KRT10; JUP; KRT14; HBD; KRT1;
Corpus, uterine	203	6997	45.7207	1.19562	0.000675361	0.572706	0.00489493	0.0191701	ABCC1; ABCD3; ANKHD1; ASAP2; ATM; AUP1; AURKB; BCL2; BRI3BP; C1orf112; C21orf59; C9orf78; CAAP1; CASP2; CBLL1; CD82; CDK1; CDK12; CDK2AP1; CDK6; CDV3; CEBPB; CELF1; CHAF1B; CKAP2; CRTC2; DDX10; DLG1; DUSP12; EIF4EBP1; EIF4ENIF1; ELP5; FAR1; FUBP1; GALT; GRIPAP1; HCCS; HDAC3; ISY1; KDM3B; KIF23; LEMD2; LPGAT1; MAN2A1; MIER1; MMP14; MRPL2; MRPL24; NDEL1; NMD3; NTMT1; NUFIP2; ORC4; PHF14; PLCB3; POL…
Amniotic fluid	27	566	6.08108	1.96647	0.000694108	0.588603	0.00498816	0.0195352	MAN1A1; MAN2A1; MYL12B; KRT6A; GAA; KRT13; KRT19; LRP1; SERPINB2; ITIH2; KRT5; KRT18; ALB; KRT8; KRT4; ADAMTSL4; RNASET2; HBD; NPC2; KRT1; CA1; SERPINB10; THY1; CD14; HEXA; CELA3A; ANXA1;
Tears	25	510	5.63063	2.0208	0.000738822	0.626521	0.00526488	0.0206189	CENPH; GRSF1; MAN2A1; PSMD5; PRTN3; SERPINB2; ITIH2; ALB; CTSZ; AZU1; JUP; FUCA1; ELANE; LGALS3; SELENBP1; FASN; CA2; CTSB; ASAH1; SERPINB10; PPT1; CD14; ANXA1; CSTB; ITGAM;
Small intestine	236	8360	53.1532	1.16335	0.000842512	0.71445	0.00595375	0.0233168	ABCC1; ABCD3; ANKHD1; ARID2; ASAP2; ATM; AUP1; AURKB; BRI3BP; C1orf112; C21orf59; C9orf78; CAAP1; CASP2; CBLL1; CCNK; CCR4; CD82; CDK1; CDK12; CDK2AP1; CDK6; CDV3; CEBPB; CELF1; CHAF1B; CHEK1; CKAP2; CRTC2; CYP51A1; DDX10; DLG1; DUSP12; EBP; EIF4EBP1; EIF4ENIF1; ELP5; ETV6; FANCD2; FAR1; FBXW11; FUBP1; GALT; GRIPAP1; HCCS; HDAC3; HPDL; ISY1; KAT7; KDM3B; KIF1BP; KIF23; KIF4A; LARP4B; LEMD2; LIMS1…
Hair follicle	8	83	1.8018	3.97639	0.000907691	0.769722	0.00636134	0.024913	CEBPB; DSG1; S100A2; KRT75; KRT82; KRT36; KRT14; TGM3;
18_size	9	104	2.02703	3.56974	0.000965908	0.81909	0.00671385	0.0262936	ITIH2; ALB; KRT77; KRT10; F13A1; KRT14; KRT1; CA1; CD14;
hupo1_b2-cit_cam	7	65	1.57658	4.4435	0.000977837	0.829206	0.00674151	0.0264019	KRT19; ITIH2; KRT5; ALB; KRT10; KRT14; KRT1;
Brain	209	7290	47.0721	1.18148	0.00103868	0.880802	0.00710324	0.0278185	ABCD3; ANKHD1; ARID2; ARPP19; ASAP2; AUP1; AURKB; BCKDHB; BCL2L1; BRI3BP; CAAP1; CCNK; CD82; CDK1; CDK12; CDK13; CDK2AP1; CDK6; CDV3; CELF1; CEND1; CKAP2; COX6A1; DES; DHCR24; DLG1; DPH5; EIF4ENIF1; FANCD2; FANCI; FBXO7; FBXW11; HCCS; HDAC3; HN1; INTS2; IPO11; ISY1; KAT7; KDM3B; KIF1BP; KIF4A; KLF13; LARP4B; LIN7C; LPGAT1; MAN1A1; MED14; MIER1; NDEL1; NMD3; NOP14; NUFIP2; ORC4; PAIP2; PDK3; PEX14…
H460	32	736	7.20721	1.79221	0.00110022	0.932984	0.00746387	0.0292309	FUBP1; HN1; MAN2A1; MYL12B; PSAT1; FUCA2; GGH; KRT19; LGMN; SERPINB2; CTSZ; DUT; KPNA2; RNASET2; LGALS3; HEXB; NPC2; CTSC; PCNA; RBM3; PPIF; YBX1; CTSB; ASAH1; SERPINB10; PPT1; CD14; CREG1; HEXA; ANXA1; CSTB; GALNS;
T cells	60	1726	13.5135	1.43274	0.00285276	1	0.01753	0.0686529	ATM; CCNK; CCR4; CD82; CDK12; CDK6; CDV3; DDX18; DHX29; DLG1; FAM98A; FUBP1; IMP3; ISY1; KLF13; LAG3; MORF4L1; NUFIP2; ORC4; PRCC; PYCR1; RIF1; RSRC2; TNIK; TRAT1; CST7; SYNE1; CUL3; ICOS; NBN; NEDD9; PTPRJ; RPS15A; FCGR2B; ALB; DUT; IL2RA; UHRF1; RPL38; KRT10; IFI30; KPNA2; NOLC1; UBAP2L; MCM3; RFC5; HBD; KRT1; PCNA; CAMP; RBM3; TRMT10C; YBX1; CTSB; HN1L; CA1; MRTO4; SEMA4A; ANXA1; STK38;
Parathyroid gland	167	5997	37.6126	1.14761	0.0166403	1	0.0825202	0.323175	ABCC1; ABCD3; ANKHD1; ASAP2; ATM; AURKB; BRI3BP; C1orf112; C21orf59; C9orf78; CAAP1; CASP2; CBLL1; CDK1; CDK12; CDK2AP1; CDK6; CDV3; CEBPB; CELF1; CHAF1B; CKAP2; CRTC2; DHCR24; DLG1; DUSP12; EIF4EBP1; EIF4ENIF1; ELP5; FAM162A; FAR1; FUBP1; GALT; GRIPAP1; HCCS; HPDL; ISY1; KDM3B; KIF23; LAG3; LEMD2; LPGAT1; MAN2A1; MMP14; MRPL24; NTMT1; NUFIP2; ORC4; OXA1L; PHF14; PLCB3; POLA1; PRCC; PRMT3; PSAT1;…
Skeletal muscles	243	9060	54.7297	1.10531	0.0147334	1	0.0743687	0.291251	ABCD3; ANKHD1; ARID2; ATM; AUP1; AURKB; BRI3BP; C1orf112; C21orf59; C9orf78; CAAP1; CASP2; CBLL1; CCNK; CD82; CDK12; CDK13; CDK2AP1; CDK6; CDV3; CEBPB; CELF1; CHAF1B; CKAP2; CLUH; CRTC2; DES; DHCR24; DLG1; DUSP12; EIF4EBP1; EIF4ENIF1; ELP5; ETV6; FAM162A; FANCD2; FAR1; FBXO7; FBXW11; FUBP1; GALT; HCCS; HDAC3; HN1; HPDL; INTS2; IPO11; ISY1; KAT7; KDM3B; KIF1BP; KIF23; KIF4A; KLF13; LARP4B; LEMD2; …
Lateral ventricle	184	6620	41.4414	1.14543	0.0116345	1	0.0609017	0.23851	ABCC1; ABCD3; ANKHD1; ASAP2; ATM; AUP1; AURKB; BRI3BP; C1orf112; C21orf59; C9orf78; CAAP1; CASP2; CBLL1; CCR4; CDK1; CDK12; CDK2AP1; CDV3; CEBPB; CELF1; CHAF1B; CKAP2; CRTC2; DDX10; DES; DHCR24; EIF4EBP1; EIF4ENIF1; ELP5; FAR1; FUBP1; GALT; GBP6; GRIPAP1; HCCS; HDAC3; HPDL; ISY1; KDM3B; KIF23; LEMD2; LPGAT1; MAN2A1; MMP14; MRPL2; MRPL24; NDEL1; NMD3; NTMT1; NUFIP2; ORC4; OXA1L; PHF14; PLCB3; POLA…
Gall bladder	203	7295	45.7207	1.14678	0.00645938	1	0.035801	0.140208	ABCC1; ABCD3; ANKHD1; ASAP2; ATM; AUP1; AURKB; BCL2L1; BRI3BP; C1orf112; C21orf59; C9orf78; CAAP1; CASP2; CBLL1; CCNK; CCR4; CD82; CDK12; CDK2AP1; CDK6; CDV3; CEBPB; CELF1; CHAF1B; CKAP2; CRTC2; DDX10; DLG1; DUSP12; EIF4EBP1; EIF4ENIF1; ELP5; ETV6; FAM162A; FAR1; FUBP1; GALT; GRIPAP1; HCCS; HPDL; ISY1; KDM3B; KIF1BP; KIF23; LEMD2; LPGAT1; MAN2A1; MIER1; MMP14; MRPL2; MRPL24; NDEL1; NMD3; NTMT1; N…
Cerebellum	203	7633	45.7207	1.096	0.0465611	1	0.19654	0.769712	ABCC1; ABCD3; ANKHD1; ARID2; ASAP2; ATM; AUP1; AURKB; BRI3BP; C1orf112; C21orf59; C9orf78; CAAP1; CASP2; CBLL1; CCR4; CDK12; CDK13; CDK2AP1; CDK6; CDV3; CEBPB; CELF1; CEND1; CHAF1B; CKAP2; CRTC2; DDX10; DES; DHCR24; DLG1; DUSP12; EBP; EIF4EBP1; EIF4ENIF1; ELP5; FAM162A; FANCI; FAR1; FBXO7; FUBP1; GALT; GRIPAP1; HCCS; HDAC3; HPDL; ISY1; KDM3B; KIF1BP; KIF23; LEMD2; LPGAT1; MAN2A1; MIER1; MRPL2; MR…
Hippocampus	199	7355	44.8198	1.11501	0.0253294	1	0.116105	0.454702	ABCC1; ABCD3; ANKHD1; ARID2; ARPP19; ASAP2; ATM; AUP1; AURKB; BRI3BP; C1orf112; C21orf59; C9orf78; CAAP1; CASP2; CBLL1; CCR4; CDK1; CDK12; CDK13; CDK2AP1; CDK6; CDV3; CEBPB; CELF1; CHAF1B; CKAP2; CRTC2; DDX10; DES; DHCR24; DLG1; DUSP12; EIF4EBP1; EIF4ENIF1; ELP5; FAM162A; FANCI; FAR1; FBXO7; FUBP1; GALT; GRIPAP1; HCCS; HDAC3; ISY1; KDM3B; KIF1BP; KIF23; LEMD2; LIMS1; LPGAT1; MAN2A1; MIER1; MMP14;…
Cerebral cortex	197	7099	44.3694	1.14361	0.00877155	1	0.0470777	0.184371	ABCC1; ABCD3; ANKHD1; ARPP19; ASAP2; ATM; AUP1; AURKB; BRI3BP; C1orf112; C21orf59; C9orf78; CAAP1; CASP2; CBLL1; CDK1; CDK12; CDK2AP1; CDK6; CDV3; CEBPB; CELF1; CEND1; CHAF1B; CKAP2; CRTC2; DDX10; DES; DHCR24; DLG1; EIF4EBP1; EIF4ENIF1; ELP5; FAM162A; FAR1; FBXO7; FUBP1; GALT; GBP6; GRIPAP1; HCCS; HDAC3; HPDL; ISY1; KDM3B; KIF1BP; KIF23; LEMD2; LPGAT1; MAN2A1; MIER1; MMP14; MRPL2; MRPL24; NDEL1; …
Kidney	280	10256	63.0631	1.12508	0.00142465	1	0.00936516	0.0366769	ABCC1; ABCD3; ANKHD1; ARID2; ASAP2; ATM; AUP1; AURKB; BCL2; BORA; BRI3BP; C1orf112; C21orf59; C9orf78; CAAP1; CASP2; CBLL1; CCNK; CD82; CDK1; CDK12; CDK13; CDK2AP1; CDK6; CDV3; CEBPB; CELF1; CHAF1B; CKAP2; CRTC2; CYP51A1; DDX10; DHCR24; DLG1; DUSP12; EBP; EIF4EBP1; EIF4ENIF1; ELP5; FAM162A; FANCD2; FANCI; FAR1; FBXO7; FBXW11; FUBP1; GALT; GBP6; GRIPAP1; HCCS; HDAC3; HLA-DRB1; HPDL; IPO11; ISY1; K…
H1688	30	1007	6.75676	1.22806	0.143573	1	0.466474	1	DLG1; HN1; MAN1A1; MYL12B; PFN2; ARSA; GGH; KRT19; LGMN; MAVS; TSTD1; CHST11; KRT8; RPL38; KPNA2; UBAP2L; MCM3; TOP2A; HEXB; NPC2; CTSA; CTSC; PCNA; PPIF; YBX1; PPT1; CREG1; HEXA; CSTB; GALNS;
Bronchus	197	6923	44.3694	1.17268	0.00254548	1	0.015756	0.0617053	ABCC1; ABCD3; ANKHD1; ASAP2; ATM; AUP1; AURKB; C1orf112; C21orf59; C9orf78; CAAP1; CASP2; CBLL1; CCR4; CDK1; CDK12; CDK2AP1; CDK6; CDV3; CEBPB; CELF1; CHAF1B; CKAP2; CRTC2; DDX10; DLG1; DUSP12; EIF4EBP1; EIF4ENIF1; ELP5; ETV6; FAR1; FUBP1; GALT; GBP6; GRIPAP1; HCCS; HPDL; ISY1; KDM3B; KIF23; LEMD2; LPGAT1; MAN2A1; MIER1; MMP14; MRPL2; MRPL24; NDEL1; NMD3; NTMT1; NUFIP2; OXA1L; PHF14; PLCB3; POLA1…
MDA231	13	336	2.92793	1.59556	0.067199	1	0.256688	1	MYL12B; FUCA2; LGMN; CTSZ; RNASET2; FUCA1; HEXB; NPC2; CTSA; FASN; CTSB; HEXA; CSTB;
Soft tissue	195	6969	43.9189	1.15312	0.00630177	1	0.0351573	0.137687	ABCC1; ABCD3; ANKHD1; ASAP2; ATM; AUP1; AURKB; BRI3BP; C1orf112; C21orf59; C9orf78; CAAP1; CASP2; CBLL1; CCR4; CD82; CDK1; CDK12; CDK2AP1; CDK6; CDV3; CEBPB; CELF1; CHAF1B; CKAP2; CRTC2; DDX10; DHCR24; DLG1; EIF4EBP1; EIF4ENIF1; ELP5; FAM162A; FAR1; FUBP1; GALT; HCCS; HPDL; ISY1; KDM3B; KIF1BP; KIF23; LAG3; LEMD2; LPGAT1; MAN2A1; MIER1; MMP14; MRPL2; NDEL1; NUFIP2; ORC4; OXA1L; PHF14; PLCB3; POLA…
Adrenal glands	212	7554	47.7477	1.15655	0.00310167	1	0.0187873	0.0735769	ABCC1; ABCD3; ANKHD1; ASAP2; ATM; AUP1; AURKB; BORA; BRI3BP; C1orf112; C21orf59; C9orf78; CAAP1; CASP2; CBLL1; CDK12; CDK2AP1; CDK6; CDV3; CEBPB; CELF1; CHAF1B; CKAP2; CRTC2; CYP51A1; DDX10; DHCR24; DLG1; EBP; EIF4EBP1; EIF4ENIF1; ELP5; FAM162A; FAR1; FUBP1; GALT; GBP6; GRIPAP1; HCCS; HLA-DRB1; HPDL; ISY1; KDM3B; KIF1BP; KIF23; KIF4A; KLF13; LEMD2; LPGAT1; MAN2A1; MIER1; MMP14; MRPL2; MRPL24; NMD…
LNCaP	51	1455	11.4865	1.4447	0.00503572	1	0.0292486	0.114547	ARPP19; CDV3; CELF1; DLG1; FUBP1; GRSF1; HN1; LIN7C; MYL12B; PAIP2; PHAX; PSAT1; PYCR1; TTC1; TXNL4A; ADA; ARHGEF7; GAA; GGH; LGMN; MAVS; CHST11; TUBAL3; DNASE1; KRT18; CTSZ; KRT8; DUT; KRT4; CTSH; ASNS; KRT10; JUP; NOLC1; RNASET2; SELENBP1; HEXB; NPC2; CTSA; KRT1; PCNA; FASN; RBM3; PPIF; YBX1; CTSB; HN1L; ASAH1; PPT1; CSTB; PCNP;
Erythrocytes	51	1539	11.4865	1.36584	0.0140781	1	0.0719172	0.28165	BCL2L1; CDK13; DAPL1; DDX19B; DPCD; F8A1; FBXO7; FUBP1; GALT; GBP6; IPO11; LIN7C; MYL12B; PHAX; PLCB3; PSMD5; PSMG3; RAC1; SMC2; VAMP3; VTI1A; HS1BP3; KLC4; NPL; CCDC9; CUL3; GPHN; PLP2; RPS15A; AP1S2; S100A2; ALB; RRM1; FLG2; JUP; ACSL4; PBK; ELANE; CDK2; SELENBP1; HBD; FASN; CA2; RBM3; BRE; CA1; ANXA1; CSTB; TGM3; PCNP; STK38;
Smooth muscle cells	135	5124	30.4054	1.08578	0.138771	1	0.456272	1	ANKHD1; ASAP2; ATM; AUP1; AURKB; BCL2; C1orf112; C21orf59; C9orf78; CAAP1; CASP2; CBLL1; CDK12; CDK2AP1; CDK6; CDV3; CELF1; CHAF1B; CKAP2; CRTC2; DES; DHCR24; DLG1; EIF4EBP1; EIF4ENIF1; ELP5; ETV6; FANCD2; FAR1; FUBP1; HCCS; ISY1; KDM3B; KIF23; LEMD2; MAN2A1; MIER1; MMP14; MRPL2; MRPL24; NDEL1; NTMT1; NUFIP2; ORC4; PHF14; PRCC; PRKCA; PRMT3; PSMD5; PSMG3; PUM1; RAC1; RAD9A; RB1; SMN1; SOAT1; SRBD…
Thymocyte	1	48	0.225225	0.866916	0.692931	1	1	1	DUT;
Heart	147	5507	33.1081	1.10007	0.0897011	1	0.327783	1	ANKHD1; ARID2; ASAP2; ATM; AUP1; BORA; BRI3BP; CASP2; CCNK; CD82; CDK12; CDK13; CDK2AP1; CKAP2; DES; DLG1; EIF4EBP1; EIF4ENIF1; ETV6; FANCD2; FANCI; FBXO7; FBXW11; HCCS; HDAC3; IPO11; ISY1; KAT7; KDM3B; KIF1BP; KIF4A; KLF13; LARP4B; LIMS1; LPGAT1; MAN1A1; MED14; MIER1; MMAB; NMD3; NOP14; NUFIP2; ORC4; PAIP2; PDK3; PEX14; PHF14; PLCB3; PRCC; PUM1; RAC1; RB1; RRM2; RSRC2; SHOC2; SOAT1; STK17A; SYNJ…
Amygdala	26	1204	5.85586	0.890221	0.760308	1	1	1	ANKHD1; ARID2; CDK13; FANCI; FBXO7; INTS2; ISY1; KDM3B; KIF1BP; MIER1; NMD3; NUFIP2; TBC1D2B; ZCCHC6; ZMYND8; MAVS; RAP1GAP2; SYNE1; CHST11; FNBP4; P2RY12; IL2RA; MSRA; UBASH3B; BRE; TGM3;
Red blood cells	6	166	1.35135	1.49186	0.216673	1	0.652799	1	GALT; PYCR1; ALOX15; CA2; CA1; GALM;
Thyroid gland	206	7306	46.3964	1.16197	0.00297804	1	0.0181682	0.0711525	ABCC1; ABCD3; ANKHD1; ASAP2; ATM; AUP1; AURKB; BCL2; BRI3BP; C1orf112; C21orf59; C9orf78; CAAP1; CASP2; CBLL1; CDK12; CDK2AP1; CDK6; CDV3; CEBPB; CELF1; CHAF1B; CKAP2; CRTC2; DDX10; DHCR24; DLG1; DUSP12; EIF4EBP1; EIF4ENIF1; ELP5; ETV6; FAR1; FBXO7; FUBP1; GALT; GRIPAP1; HCCS; HDAC3; HPDL; ISY1; KDM3B; KIF1BP; KIF23; KIF4A; KLF13; LEMD2; LPGAT1; MAN2A1; MIER1; MRPL2; MRPL24; NDEL1; NMD3; NSA2; NT…
Heart muscle	166	6191	37.3874	1.10499	0.0613484	1	0.241176	0.944521	ABCD3; ANKHD1; ATM; AUP1; BRI3BP; C1orf112; C21orf59; C9orf78; CAAP1; CBLL1; CCR4; CDK12; CDK2AP1; CELF1; CHAF1B; CKAP2; CRTC2; DDX10; DES; DHCR24; EIF4EBP1; EIF4ENIF1; ELP5; ETV6; FANCD2; FAR1; FUBP1; GALT; GBP6; HCCS; HDAC3; HPDL; ISY1; KDM3B; KIF1BP; KIF23; LEMD2; MAN2A1; MMP14; MRPL2; NDEL1; NMD3; NTMT1; NUFIP2; ORC4; PHF14; POLA1; PRCC; PRKCA; PRMT3; PSMD5; PSMG3; PUM1; RAC1; RAD9A; RB1; SMN…
Spinal cord	36	1465	8.10811	1.01291	0.494096	1	1	1	ANKHD1; ARID2; CDK13; CEND1; FANCI; FBXO7; INTS2; ISY1; KDM3B; KIF1BP; KLF13; MIER1; NUFIP2; SMN1; SOAT1; TBC1D2B; ZCCHC6; ZMYND8; MAVS; RAP1GAP2; SYNE1; CHST11; DGCR8; FNBP4; GPHN; ZNRF2; MYO5C; P2RY12; DRP2; IL2RA; ACSL4; MSRA; SCD; UBASH3B; HNMT; BRE;
Huh7	80	2976	18.018	1.10789	0.171097	1	0.539369	1	AUP1; CASP2; CHTF18; CKAP2; DHCR24; DLGAP4; DPH5; ELP5; FAM98A; HLA-DRB1; HN1; KAT7; KDM3B; KIAA0101; KIF4A; KIFC1; LAG3; MRPS21; MYO9B; NMD3; NSA2; NUFIP2; PHAX; POLA1; PSAT1; PSMD5; PUM1; QTRT1; REXO4; RIF1; SDAD1; THUMPD3; TUBGCP4; TXNIP; WDR76; ZCCHC6; KRT6A; DTX3L; HS1BP3; IFIT1; LRP1; MYH2; NUP37; VAV2; CLPB; CUL3; DGCR8; EZH1; NBN; WDR46; KRT79; ALB; RRM1; DUT; AZU1; NPM3; IFI30; ACSL4; RN…
Lens	38	1037	8.55856	1.51044	0.00755078	1	0.0410453	0.160746	CASP2; CELF1; DPH5; FUBP1; HLA-DRB1; MYL12B; PAIP2; PSAT1; QTRT1; RAC1; RANBP6; ARHGEF7; DTX3L; IFIT1; LGMN; ALB; RRM1; KRT8; KRT77; ASNS; RNASET2; MCM3; MCM4; MCM2; NPC2; CTSA; KRT1; PCNA; FASN; CA2; MCM5; TRMT10C; CTSB; CTSS; PPT1; GALM; ANXA1; CSTB;
Hair	34	817	7.65766	1.7154	0.00162008	1	0.0104078	0.0407603	ABCD3; DDX19B; RAC1; SEC24B; TMEM41B; VAMP7; CPT1A; DSG1; GGH; DHCR7; PLP2; RPS15A; KRT82; KRT36; ALB; KRT8; KRT4; KRT10; JUP; RNASET2; FUCA1; KRT14; LGALS3; HEXB; SCD; KRT1; FASN; CA2; RBM3; CTSB; ASAH1; ANXA1; CSTB; TGM3;
H520	35	843	7.88288	1.71138	0.00144473	1	0.00942411	0.0369078	CDV3; DDX19B; HN1; MAN1A1; MAN2A1; PFN2; PSAT1; FUCA2; GGH; KRT19; LGMN; CUL3; KRT3; KRT18; ALB; RRM1; CTSZ; KRT8; DUT; KPNA2; RNASET2; MCM3; MCM4; LGALS3; HBD; NPC2; CTSC; KRT1; PCNA; RBM3; YBX1; HN1L; PPT1; HEXA; CSTB;
Uterus	19	917	4.27928	0.854271	0.792925	1	1	1	KIF4A; MIER1; NMD3; BCL2L15; KRT13; NPL; SYNE1; CHST11; TGFB3; ZNRF2; MYO5C; P2RY12; CTSH; NPM3; MSRA; CAMP; BRE; CTSS; HN1L;
Tracheobronchial cells	1	47	0.225225	0.885357	0.685274	1	1	1	ANXA1;
T24	5	123	1.12613	1.67836	0.179486	1	0.555488	1	GGH; CTSZ; FUCA1; NPC2; HEXA;
Preadipocytes	19	510	4.27928	1.536	0.0434956	1	0.186284	0.729548	MAN1A1; PSAT1; KRT6A; LRP1; ITIH2; KRT5; ALB; CTSZ; KRT14; LGALS3; SELENBP1; KRT1; FASN; CTSB; IL1B; THY1; SLC2A3; ANXA1; FTL;
Fetal hepatocytes	96	3784	21.6216	1.04557	0.328173	1	0.903541	1	ATM; CCR4; CD82; CDK12; CDK6; CELF1; CHTF18; COG4; CYP51A1; DCAF13; DHX29; DUSP12; EHMT2; ETV6; FAM162A; FAM98A; FBXW11; HDAC3; HLA-DRB1; KIF4A; LIN7C; MRPS21; NDEL1; PFN2; PSAT1; PUM1; RIF1; RRM2; SEC24B; SPATA5L1; SRSF12; TEX264; TMEM70; TOMM40; UNC119B; ZCCHC6; ARSA; DSG1; DTX3L; FUCA2; IFIT1; LRP1; MAVS; SYNE1; TMBIM1; VAV2; AGBL3; DGCR8; DHCR7; ELOVL1; IVNS1ABP; NEDD9; TGFB3; VWA9; CCDC94; M…
	44	1183	9.90991	1.53303	0.00318227	1	0.0191388	0.0749534	ABCD3; ATM; CDK1; COG4; DLG1; IPO11; LIN7C; PFN2; PRKCA; RAC1; SEC24B; SLC35E1; TEX264; CPT1A; DSG1; FGR; GAA; LGMN; LRP1; SERPINB2; DHCR7; PLP2; RPS15A; DAB2; ALB; CTSZ; DUT; ADAMTSL4; FLG2; RPL38; JUP; SLC16A3; F13A1; CDK2; CTSA; FASN; CA2; RBM3; CTSB; MRC1; CA1; PPT1; ANXA1; CSTB;
HH4	87	2684	19.5946	1.3359	0.00252372	1	0.0157362	0.0616278	ABCC1; ANAPC4; AURKB; BCKDHB; CDK12; CDK13; CEBPB; CELF1; CHEK1; COG4; DHCR24; FANCD2; FBXW11; HLA-DRB1; LIN7C; MMAB; MMP14; MRPL47; MRPS18B; MRPS21; NUFIP2; PFN2; PSAT1; REXO4; RIF1; SEC24B; SMC2; SRBD1; TRAT1; TTC1; ZMYND8; ACAD9; FUCA2; GAA; LGMN; LRP1; NUP37; SERPINB2; SYNE1; VAV2; AGBL3; CLPB; CUL3; DHCR7; IVNS1ABP; MRPL28; NBN; NEDD9; RCL1; TUBAL3; DSN1; PDPR; NAAA; KRT36; ALB; CTSZ; DUT; A…
Leukocytes	89	2845	20.045	1.28927	0.00606665	1	0.0340697	0.133428	AUP1; BRI3BP; CCNK; CCR4; CD82; CDK13; CDV3; CKAP2; CLK3; CYP51A1; DUSP12; EHMT2; EIF4EBP1; FBXW11; FUBP1; GRIPAP1; HDAC3; HN1; KAT7; KDM3B; KIF4A; LARP4B; LIMS1; LPGAT1; MAN1A1; MIER1; MYO9B; NMD3; NSA2; ORC4; PAIP2; RRM2; TXNIP; CST7; FGR; GGH; NPL; PRTN3; SERPINB2; SYNE1; VAV2; CHST11; DGCR8; NBN; NEDD9; PTPRJ; MKRN3; MYO5C; P2RY12; ST6GALNAC2; FCGR2B; ALB; CTSZ; IL2RA; AZU1; NPM3; ACSL4; SLC1…
Aorta	18	530	4.05405	1.40029	0.0961986	1	0.342758	1	DES; FBXO7; KIF4A; MIER1; NMD3; LRP1; SERPINB2; SYNE1; CHST11; MYO5C; P2RY12; ALB; UHRF1; KRT10; MSRA; BRE; CTSB; FTL;
hupo46_reference_cam	34	1042	7.65766	1.345	0.0488568	1	0.200335	0.784574	ABCD3; BCKDHB; CDC42SE2; DLG1; FAM162A; LEMD2; MRPL2; MRPS18B; MYL12B; PDK3; PRKCA; RAC1; SYNJ2BP; TOMM40; ACAD9; MAVS; CSNK1G1; DHCR7; GPHN; ITIH2; MFF; ALB; HBD; SCD; FASN; PPIF; YBX1; CTSB; CA1; PPT1; THY1; PRPSAP1; FTL; SEPT3;
Substantia nigra	24	1146	5.40541	0.863358	0.801612	1	1	1	ANKHD1; ARID2; CDK13; FANCI; FBXO7; INTS2; ISY1; KDM3B; KIF1BP; MIER1; NMD3; NUFIP2; TBC1D2B; ZCCHC6; MAVS; RAP1GAP2; SYNE1; CHST11; FNBP4; P2RY12; MSRA; CTSA; UBASH3B; BRE;
Monocytes	30	745	6.75676	1.65994	0.00479351	1	0.0280338	0.109789	ASAP2; BRI3BP; CCR4; CD69; CD82; RAC1; CPT1A; FGR; PRTN3; SERPINB2; ELOVL1; PLP2; FCGR2B; KRT10; RNASE6; ALOX15; ELANE; LGALS3; CTSC; KRT1; CA2; CAMP; BRE; PPIF; THY1; CD14; ANXA1; CSTB; FTL; ITGAM;
MDA-MB-468	26	770	5.85586	1.39197	0.0567033	1	0.225748	0.884102	ABCD3; DHCR24; FUBP1; MYL12B; PSAT1; RAC1; SYNJ2BP; TTC1; KRT6A; GAA; KRT19; RPS15A; KRT5; KRT18; ALB; KRT8; KRT10; MCM3; LGALS3; SELENBP1; KRT1; FASN; YBX1; CTSB; ANXA1; CSTB;
HL60	25	545	5.63063	1.89102	0.00185308	1	0.0118152	0.0462719	ABCC1; CD82; DDX18; HLA-DRB1; LRP1; PRTN3; ELOVL1; PLP2; PTPRJ; FCGR2B; KRT75; ALB; IL2RA; KRT10; SLC16A3; ELANE; KRT14; KRT1; FASN; MAN2A2; CTSS; SEMA4A; CD14; FTL; ITGAM;
TOV21G	37	904	8.33333	1.68707	0.00136901	1	0.00906971	0.0355198	CDV3; FUBP1; HN1; MYL12B; PFN2; PSAT1; TTC1; FUCA2; GAA; GGH; KRT19; ALB; CTSZ; KRT8; DUT; CTSH; KPNA2; RNASET2; MCM3; MCM4; KRT14; LGALS3; HEXB; NPC2; CTSA; CTSC; KRT1; PCNA; RBM3; CTSB; HN1L; ASAH1; PPT1; HEXA; ANXA1; CSTB; GALNS;
Corpus callosum	23	988	5.18018	0.959716	0.612556	1	1	1	ANKHD1; ARID2; CDK13; FANCI; FBXO7; INTS2; ISY1; KDM3B; KIF1BP; LIMS1; MIER1; NUFIP2; TBC1D2B; ZCCHC6; ZMYND8; MAVS; RAP1GAP2; SYNE1; FNBP4; IL2RA; MSRA; UBASH3B; TGM3;
Mammary gland	18	760	4.05405	0.976521	0.576577	1	1	1	CASP2; KIF4A; MIER1; NMD3; TUBGCP4; TXNIP; SYNE1; ZNRF2; MYO5C; P2RY12; KRT18; DAB2; ALB; KRT8; CDK2; MSRA; FASN; BRE;
Cellzome_Abl_inhibitors_NatureBiotechnology_exp144	7	186	1.57658	1.55299	0.167321	1	0.531416	1	NDUFAF3; PRKCA; SMC2; UBE2C; ALB; SLC16A3; NOLC1;
hupo1_b1-hep_cam	4	80	0.900901	2.06532	0.12973	1	0.434827	1	ITIH2; ALB; KRT10; KRT1;
Subthalamic nucleus	22	882	4.95495	1.02833	0.478439	1	1	1	ANKHD1; ARID2; CDK13; FANCI; ISY1; KDM3B; KIF1BP; LIMS1; MIER1; NMD3; NUFIP2; TBC1D2B; ZCCHC6; ZMYND8; MAVS; RAP1GAP2; SYNE1; FNBP4; P2RY12; IL2RA; UBASH3B; BRE;
Dentin	7	246	1.57658	1.17423	0.388667	1	1	1	LRP1; ITIH2; KRT82; KRT36; ALB; FLG2; LGALS3;
J82	4	216	0.900901	0.764994	0.772426	1	1	1	PSAT1; RBM3; ANXA1; CSTB;
15_clinprot_c3	30	749	6.75676	1.65107	0.00516533	1	0.0296739	0.116212	FUBP1; HLA-DRB1; KIFC1; PDK3; PHF14; REXO4; RIF1; DSG1; LGMN; POLR2J; CLPB; CUL3; ITIH2; KRT5; ALB; KRT77; CTSH; HARS2; KRT10; NPM3; JUP; MCM2; KRT14; CTSC; KRT1; PCNA; RBM3; PPIF; MTHFD2; ACAD8;
Cortex	13	683	2.92793	0.784942	0.850228	1	1	1	CEND1; PDK3; PFN2; PRKCA; PSAT1; RAC1; ALB; HBD; KRT1; CA2; CA1; THY1; SEPT3;
N06cs122	7	123	1.57658	2.34836	0.0304334	1	0.135118	0.529165	CDK1; KRT6A; KRT5; ALB; KRT8; ANXA1; MRPS9;
hupo1_b2-edta_cam	15	316	3.37838	1.95734	0.0106486	1	0.0567925	0.222417	ABCB8; DHCR24; DHX36; FANCI; TIMELESS; CLPB; ITIH2; RPS15A; KRT79; ALB; KRT10; KPNA2; MCM3; KRT1; CD14;
H23	33	896	7.43243	1.51817	0.0115434	1	0.0607998	0.238111	CDV3; FUBP1; HN1; MYL12B; ADA; GAA; GGH; LGMN; CHST11; CUL3; CTSZ; KRT8; DUT; RPL38; KPNA2; RNASET2; UBAP2L; MCM3; TOP2A; HEXB; NPC2; CTSA; CTSC; PCNA; FASN; CA2; CTSB; PPT1; CD14; HEXA; ANXA1; CSTB; GALNS;
Ileum	3	201	0.675676	0.617073	0.86925	1	1	1	SYNE1; ACSL4; MSRA;
Nuclear	47	1319	10.5856	1.46869	0.00521393	1	0.0296739	0.116212	CCNK; CELF1; CLUH; DDX31; DHX29; DHX36; DLG1; FTSJ3; FUBP1; KIF1BP; NCAPD3; NMD3; PSAT1; PYCR1; REXO4; SEC24B; SHOC2; SMN1; TOMM34; ZCCHC6; ACAD9; DTX3L; FUCA2; KLC4; TSTD1; FNBP4; METTL13; RINT1; RPS15A; SAP130; CTSH; NPM3; JUP; RNASET2; UBAP2L; RFC5; MCM4; NPC2; PCNA; FASN; KIAA0196; PPIF; CTSB; MTHFD2; PPT1; CREG1; ACAD8;
N06CS98-2	6	165	1.35135	1.5009	0.212821	1	0.646854	1	CDK1; DLG1; FGR; NEDD9; KRT8; ANXA1;
MV4-11	16	382	3.6036	1.72705	0.0248277	1	0.114423	0.448118	ATM; AURKB; CCNK; CDK1; CDK12; CDK13; CDK6; DPH5; MED14; FGR; STRADA; CCNA2; RPS15A; THADA; CDK2; ACAD8;
Caudate nucleus	27	1204	6.08108	0.924447	0.693845	1	1	1	ANKHD1; ARID2; ARPP19; CDK13; FANCI; FBXO7; INTS2; ISY1; KDM3B; KIF1BP; LIMS1; MIER1; NMD3; NUFIP2; TBC1D2B; ZCCHC6; ZMYND8; MAVS; RAP1GAP2; SYNE1; CHST11; FNBP4; P2RY12; IL2RA; MSRA; UBASH3B; BRE;
Retina	5	364	1.12613	0.567168	0.943048	1	1	1	TUBGCP4; KRT13; LRP1; MRPL28; SCD;
Medulla oblongata	11	473	2.47748	0.959189	0.600024	1	1	1	CEND1; FBXO7; KIF1BP; MIER1; NMD3; SYNE1; CHST11; GPHN; P2RY12; MSRA; BRE;
Bladder cancer cells	16	369	3.6036	1.78789	0.0186888	1	0.09214	0.360849	MYL12B; RAC1; KRT13; KRT19; TMBIM1; KRT5; KRT18; ALB; KRT8; JUP; KRT14; LGALS3; HBD; KRT1; FASN; ANXA1;
Neutrophils	20	393	4.5045	2.09812	0.00157175	1	0.0101744	0.0398461	CD69; STX5; PRTN3; PTPRJ; ALB; AZU1; RNASET2; RNASE6; ELANE; LGALS3; CAMP; ASAH1; SERPINB10; THY1; CD14; HEXA; SLC2A3; ANXA1; FTL; ITGAM;
Parathyroid	28	782	6.30631	1.47601	0.0263626	1	0.118912	0.465697	ATM; CDK1; CDK6; EIF4EBP1; EIF4ENIF1; GRIPAP1; HCCS; LAG3; OXA1L; PHF14; POLA1; RAC1; RB1; SYNJ2BP; TRAT1; WDHD1; ZFP36L1; KRT19; LGMN; CUL3; KRT18; KRT8; TYMS; JUP; TOP2A; LGALS3; CTSB; NAGA;
Temporal cortex	1	51	0.225225	0.815931	0.714804	1	1	1	P2RY12;
Keratinocytes	15	250	3.37838	2.47406	0.00121805	1	0.00819767	0.0321047	CDK1; CDK2AP1; CEBPB; POLA1; DSG1; SERPINB2; S100A2; KRT75; UBAP2L; CDK2; SCD; KRT1; CAMP; CTSS; TGM3;
Fetus	66	2992	14.8649	0.909147	0.821485	1	1	1	ANKHD1; ARID2; BRI3BP; CDK13; EHMT2; EIF4ENIF1; FANCD2; FANCI; FBXO7; FUBP1; HDAC3; INTS2; KDM3B; KIF1BP; KIF4A; MIER1; NDEL1; NMD3; NUFIP2; PRCC; RB1; REXO4; RIF1; SDAD1; SPC25; TBC1D2B; ZCCHC6; ZMYND8; MAVS; RAP1GAP2; STRADA; SYNE1; VAV2; CHST11; DGCR8; EZH1; FNBP4; GPHN; HERC6; ICOS; MRPL28; ZNRF2; MKRN3; P2RY12; KRT18; DAB2; CTSZ; IL2RA; UHRF1; CTSH; ACSL4; PBK; MSRA; LGALS3; SCD; PCNA; FASN;…
MCF7	17	317	3.82883	2.21115	0.00200222	1	0.0126708	0.0496227	KIF23; MAN2A1; FUCA2; GAA; GGH; KRT19; LGMN; PTPRJ; KRT18; KRT8; RNASET2; FUCA1; HEXB; CTSA; FASN; PPT1; HEXA;
051503_BAL20_gly_hui	14	268	3.15315	2.15414	0.00604768	1	0.0340697	0.133428	DHCR24; MYL12B; NCAPD3; KRT6A; CLPB; CUL3; ITIH2; ALB; CTSH; KRT10; KRT1; PCNA; MCM5; MTHFD2;
Adducin	22	486	4.95495	1.86622	0.00397591	1	0.0234137	0.0916954	CDK6; CELF1; CRTC2; FUBP1; LIN7C; MYL12B; PHF14; SYNE1; UHRF1; NPM3; ACSL4; MCM3; MCM2; TOP2A; HEXB; NPC2; CTSC; PCNA; FASN; MCM5; PPIF; CTSS;
22_mars	10	196	2.25225	2.10447	0.0216622	1	0.104372	0.408754	KRT6A; GGH; KRT19; ITIH2; ALB; KRT77; KRT10; KRT1; CA1; CD14;
041803_BALF3	39	1103	8.78378	1.45742	0.0118868	1	0.0618404	0.242186	ANKHD1; CDV3; FUBP1; HLA-DRB1; LIN7C; MYL12B; NUFIP2; PHAX; SHOC2; MAVS; PRTN3; CUL3; ITIH2; RPS15A; ALB; RRM1; DUT; F13A1; MCM3; MCM4; MCM2; HBD; CTSC; PCNA; FASN; CA2; MCM5; HMGCS1; YBX1; ASAH1; CA1; IL1B; CD14; APOBR; HEXA; ANXA1; CSTB; FTL; ITGAM;
Macrophages	14	274	3.15315	2.10697	0.00729717	1	0.0399226	0.156349	SOAT1; FGR; LRP1; SERPINB2; PTPRJ; DAB2; LGALS3; CTSC; MRC1; IL1B; CD14; APOBR; FTL; ITGAM;
Muscle	30	904	6.75676	1.36798	0.0516991	1	0.209765	0.821505	ANKHD1; BCL2L1; CDK13; CLK3; DES; DLG1; MAN1A1; PEX14; PLCB3; PRKCA; PUM1; VAMP3; ARHGEF7; GAA; KRT19; MYH2; TGFB3; AP1S2; LRP5; NPM3; SLC16A3; FUCA1; NPC2; CTSC; CTSB; ASAH1; CA1; PAK1IP1; PPT1; RORA;
Synovial membrane	1	8	0.225225	5.19608	0.17845	1	0.554306	1	CAMP;
Hypothalamus	2	147	0.45045	0.563426	0.875222	1	1	1	LIMS1; P2RY12;
Ventricles	2	151	0.45045	0.548501	0.884553	1	1	1	SYNE1; MSRA;
Thalamus	24	1141	5.40541	0.867142	0.794998	1	1	1	ANKHD1; ARID2; CDK13; FANCI; FBXO7; INTS2; ISY1; KDM3B; KIF1BP; LIMS1; MIER1; NUFIP2; ZCCHC6; ZMYND8; MAVS; RAP1GAP2; SYNE1; CHST11; FNBP4; GPHN; P2RY12; MSRA; UBASH3B; BRE;
Putamen	12	527	2.7027	0.939099	0.630052	1	1	1	ARPP19; CEND1; FBXO7; KIF1BP; MIER1; NMD3; SYNE1; CHST11; GPHN; P2RY12; MSRA; BRE;
PT45	15	361	3.37838	1.71336	0.030994	1	0.13689	0.536105	MAN2A1; FUCA2; GAA; GGH; LGMN; PTPRJ; CTSZ; DUT; RNASET2; HEXB; NPC2; CTSC; CTSB; HEXA; ANXA1;
Jejunum	3	194	0.675676	0.639337	0.853203	1	1	1	SYNE1; MSRA; SLC2A3;
ARPE-19	18	330	4.05405	2.24892	0.00123819	1	0.00826761	0.0323786	DES; MMP14; MRPS26; TOMM40; GGH; KRT13; ELOVL1; KRT18; ALB; KRT8; KRT10; HEXB; KRT1; RBM3; CTSB; ASAH1; HEXA; ANXA1;
BOB2H_ISB	6	98	1.35135	2.52692	0.0320873	1	0.140984	0.552139	DHX36; ITIH2; ALB; KRT77; KRT10; KRT1;
Temporal lobe	9	477	2.02703	0.778367	0.821923	1	1	1	CEND1; FBXO7; KIF1BP; MIER1; NMD3; SYNE1; CHST11; MSRA; BRE;
hupo53_reference_cam	6	104	1.35135	2.38115	0.0410779	1	0.176822	0.692492	ITIH2; ALB; KRT10; F13A1; HBD; KRT1;
Lacrimal glands	21	453	4.72973	1.9112	0.0036912	1	0.0218891	0.0857244	CENPH; MAN2A1; PSMD5; PRTN3; SERPINB2; ITIH2; CTSZ; AZU1; JUP; FUCA1; ELANE; LGALS3; SELENBP1; FASN; CA2; CTSB; ASAH1; PPT1; CD14; CSTB; ITGAM;
hupo1_b1-edta_cam	2	42	0.45045	1.97165	0.271365	1	0.785383	1	ITIH2; ALB;
Cervix	5	104	1.12613	1.98495	0.10896	1	0.382504	1	ANKHD1; PAIP2; KRT8; PCNA; CAMP;
Megakaryocytes	2	47	0.45045	1.76195	0.316447	1	0.885634	1	VAMP3; AZU1;
Epidermis	5	95	1.12613	2.17298	0.0813992	1	0.304082	1	CEBPB; DSG1; S100A2; KRT5; TGM3;
Embryo	1	104	0.225225	0.40016	0.922859	1	1	1	SEMA4A;
Thymus	20	456	4.5045	1.80826	0.00821396	1	0.0443659	0.173751	CD82; CHEK1; CKAP2; FANCD2; KAT7; KDM3B; KIF4A; MAN1A1; MIER1; NCAPD3; RRM2; KRT6A; CST7; TSTD1; NBN; PTPRJ; MYO5C; CTSZ; CTSC; CAMP;
Aspc1	20	483	4.5045	1.70718	0.0146941	1	0.0743687	0.291251	MAN1A1; MAN2A1; PLCB3; GGH; LGMN; CTSZ; ASNS; RNASET2; LGALS3; HEXB; NPC2; CTSA; CTSC; PCNA; CTSB; CTSS; HEXA; ANXA1; CSTB; SMPDL3A;
Vermiform appendix	11	286	2.47748	1.58633	0.0900629	1	0.327783	1	HDAC3; KIF4A; MIER1; NMD3; SYNE1; CHST11; MYO5C; P2RY12; UHRF1; MSRA; FASN;
Mast cells	2	62	0.45045	1.33574	0.446028	1	1	1	CCR4; FASN;
Cardiomyocytes	1	31	0.225225	1.34217	0.533345	1	1	1	SOAT1;
Bone	6	112	1.35135	2.21108	0.0553249	1	0.222349	0.870787	BORA; TGFB3; CTSC; CTSB; CTSS; FTL;
Trachea	17	612	3.82883	1.14534	0.318344	1	0.888013	1	KIF4A; KLF13; MIER1; NMD3; PAIP2; SYNE1; CHST11; DGCR8; GPHN; ZNRF2; MYO5C; P2RY12; ACSL4; MSRA; SCD; CAMP; BRE;
Astrocytes	2	58	0.45045	1.42784	0.412667	1	1	1	LRP1; FASN;
HCC78	10	249	2.25225	1.65655	0.0828937	1	0.308306	1	CDK1; CDV3; SLC35E1; NEDD9; KRT18; KRT8; JUP; UBAP2L; CDK2; RBM3;
RBC	11	267	2.47748	1.69921	0.0618931	1	0.241176	0.944521	ABCC1; MYL12B; RAC1; CPT1A; TMBIM1; ALB; LGALS3; CA2; CA1; SLC2A3; ANXA1;
Hepatocytes	3	73	0.675676	1.69891	0.260837	1	0.7575	1	MAN2A1; SOAT1; FASN;
Nervous system	4	212	0.900901	0.779427	0.759794	1	1	1	DHCR24; GEMIN6; GPHN; P2RY12;
Transverse colon	1	48	0.225225	0.866916	0.692931	1	1	1	SYNE1;
Occipital lobe	7	359	1.57658	0.804635	0.771675	1	1	1	FBXO7; KIF1BP; MIER1; SYNE1; CHST11; MSRA; BRE;
N06CS97	13	270	2.92793	1.98557	0.0150397	1	0.0754655	0.295547	CDK1; DLG1; PFN2; FGR; KRT19; KRT5; KRT18; ALB; KRT8; JUP; CDK2; HBD; SKAP2;
Blood vessels	3	130	0.675676	0.954063	0.614421	1	1	1	F13A1; CTSB; FTL;
NIBSC_glyco_qstar	2	60	0.45045	1.38026	0.429476	1	1	1	ITIH2; ALB;
Cartilage	2	89	0.45045	0.930561	0.639742	1	1	1	MMP14; CTSB;
MiaPaCa2	11	289	2.47748	1.56986	0.0951247	1	0.340362	1	GAA; GGH; ITIH2; CTSZ; CTSH; HEXB; NPC2; CTSB; HEXA; ANXA1; FTL;
Intestine	14	508	3.15315	1.13646	0.351444	1	0.96137	1	ABCC1; CDK13; FANCD2; MAN1A1; PUM1; WDR76; KRT19; LRP5; KRT8; CTSH; SELENBP1; NPC2; CTSC; CTSB;
Blood	7	227	1.57658	1.27251	0.313812	1	0.881168	1	PSMD5; F13A1; TOP2A; CD14; ANXA1; FTL; NAGA;
Stem cell	8	138	1.8018	2.39171	0.0194507	1	0.0953421	0.37339	ARSA; ALB; KRT77; KRT10; HEXB; KRT1; CTSB; FTL;
Adipocytes	3	147	0.675676	0.843737	0.695977	1	1	1	FASN; IL1B; SLC2A3;
Pituitary gland	11	494	2.47748	0.918415	0.656891	1	1	1	FBXO7; KIF4A; MIER1; NMD3; SOAT1; CHST11; RFX1; MYO5C; P2RY12; MSRA; BRE;
BOBFreezeThaw	2	64	0.45045	1.294	0.462308	1	1	1	ITIH2; ALB;
032403_BALF4_glypep	4	43	0.900901	3.84204	0.0200304	1	0.0970614	0.380123	PRTN3; ITIH2; ALB; ELANE;
B cells	19	533	4.27928	1.46972	0.0620002	1	0.241176	0.944521	ABCC1; CD82; DLG1; HLA-DRB1; MYL12B; PSAT1; RAC1; TNIK; FGR; DHCR7; ITIH2; RPS15A; ALB; DUT; ACSL4; PCNA; FASN; YBX1; SLC2A3;
SH-SY5Y	22	537	4.95495	1.68898	0.0121374	1	0.0627595	0.245786	BCKDHB; DLGAP4; FUBP1; HN1; MORF4L1; MRPS21; NOB1; POLA1; PRKCA; PSMD5; QTRT1; RMI2; UBE2C; ALB; NPM3; MCM3; MCM2; STMN2; FASN; BRE; YBX1; PCNP;
Adrenal cortex	5	82	1.12613	2.51744	0.0491387	1	0.200335	0.784574	NSA2; SOAT1; ACSL4; FASN; BRE;
Mesothelioma cells	1	29	0.225225	1.4347	0.509806	1	1	1	ANXA1;
Hematopoietic stem cells	12	200	2.7027	2.47445	0.00363885	1	0.0217306	0.0851039	ABCC1; CD69; CDK1; CDK6; FGR; BMI1; CCNA2; KRT5; CDK2; CTSC; CD14; ITGAM;
20_cys	4	96	0.900901	1.72114	0.2046	1	0.624104	1	ITIH2; ALB; KRT1; CD14;
hupo1_b1-cit_cam	3	71	0.675676	1.74676	0.247755	1	0.724469	1	ITIH2; ALB; F13A1;
Natural killer cell	5	106	1.12613	1.9475	0.115633	1	0.396991	1	CCR4; CD69; LAG3; CST7; CAMP;
Panc1	8	346	1.8018	0.953962	0.60485	1	1	1	DSG1; GGH; DUT; NPC2; PCNA; FASN; ANXA1; CSTB;
Frontal lobe	10	480	2.25225	0.859352	0.731922	1	1	1	CEND1; FBXO7; KIF1BP; MIER1; NMD3; SYNE1; CHST11; P2RY12; MSRA; BRE;
Pons	5	134	1.12613	1.54059	0.226454	1	0.673801	1	FBXO7; SYNE1; GPHN; MSRA; CTSA;
Breast milk	2	73	0.45045	1.13449	0.531923	1	1	1	SELENBP1; FASN;
Lymphocytes	20	468	4.5045	1.76189	0.0107259	1	0.0568474	0.222632	CD69; LIN7C; MAN1A1; POLA1; RAC1; SEC24B; TRAT1; FGR; SYNE1; ICOS; FCGR2B; RRM1; TOP2A; CDK2; CTSC; PCNA; CAMP; MAN2A2; THY1; ITGAM;
01_glyco	23	667	5.18018	1.42158	0.0583364	1	0.231165	0.905314	ABCB8; CYP51A1; DLG1; FUBP1; PYCR1; ACAD9; CPT1A; NUP37; CLPB; ITIH2; ALB; CTSH; JUP; RNASET2; RFC5; NPC2; KRT1; PCNA; FASN; TRMT10C; PPIF; MTHFD2; CD14;
Nucleus accumbens	4	166	0.900901	0.9954	0.575371	1	1	1	ARPP19; FBXO7; SYNE1; CHST11;
Bronchoalveolar fluid	8	186	1.8018	1.77453	0.0841148	1	0.309304	1	CDK6; KIF23; VAV2; ITIH2; MYO5C; MCM3; NPC2; ANXA1;
21_unfract	6	95	1.35135	2.60671	0.0281178	1	0.126158	0.494075	ITIH2; KRT5; ALB; KRT10; KRT14; KRT1;
Bronchial epithelial cells	5	69	1.12613	2.99167	0.0260126	1	0.117961	0.461972	SOAT1; MYO5C; ALOX15; CTSA; PCNA;
Frontal cortex	3	113	0.675676	1.09758	0.519384	1	1	1	ARPP19; SMN1; TGM3;
Kidney cancer	15	352	3.37838	1.75717	0.0255615	1	0.116539	0.456402	ASAP2; PLCB3; PYCR1; TMEM70; KRT13; LRP1; ITIH2; ALB; KRT8; KRT4; KRT10; AK4; HBD; KRT1; THY1;
Umbilical vein endothelial cells	3	178	0.675676	0.696802	0.809986	1	1	1	KRT1; MTHFD2; THY1;
Eyes	7	122	1.57658	2.36761	0.0292871	1	0.130713	0.511913	CCNK; ZMYND8; KRT13; LRP1; FUCA1; LGALS3; FTL;
H2228	8	168	1.8018	1.96465	0.0527439	1	0.212985	0.834115	ABCC1; CDK1; CDV3; NEDD9; KRT18; CDK2; RBM3; ANXA1;
Dentate nucleus	1	14	0.225225	2.97078	0.2911	1	0.828366	1	CTSA;
Granulocytes	4	89	0.900901	1.85649	0.170349	1	0.539014	1	CD82; PRTN3; AZU1; CAMP;
Ventricular septum	1	82	0.225225	0.507507	0.867199	1	1	1	SYNE1;
Peripheral blood leukocytes	6	125	1.35135	1.98115	0.0841186	1	0.309304	1	CD82; KAT7; KRT6A; CST7; CTSZ; CAMP;
BJ635	6	175	1.35135	1.41514	0.252334	1	0.735324	1	CDK1; CDV3; NEDD9; CDK2; HBD; ANXA1;
Mesenchymal stromal cells	7	178	1.57658	1.62279	0.143034	1	0.466474	1	ABCC1; MMP14; LRP1; DHCR7; PLP2; SLC16A3; THY1;
H1703	6	138	1.35135	1.79453	0.119765	1	0.409519	1	CDK1; CDV3; CDK2; RBM3; YBX1; ANXA1;
T lymphocytes	1	32	0.225225	1.30024	0.544688	1	1	1	PTPRJ;
Cellzome_Abl_inhibitors_NatureBiotechnology_exp142	3	83	0.675676	1.49425	0.327167	1	0.903541	1	UNC119B; TUBAL3; CDK2;
Adipose tissue	6	155	1.35135	1.59773	0.175731	1	0.54989	1	EIF4EBP1; PAIP2; DHCR7; CTSS; PRPSAP1; SLC2A3;
Occipital pole	2	129	0.45045	0.642037	0.824076	1	1	1	CEND1; NMD3;
Chondrocytes	2	65	0.45045	1.2741	0.470342	1	1	1	TXNIP; CTSB;
hupo55_b1-cit_cam	4	78	0.900901	2.11827	0.121316	1	0.411505	1	ALB; KRT10; KRT1; PRPSAP1;
Tongue	3	54	0.675676	2.29657	0.14305	1	0.466474	1	DSG1; KRT14; CAMP;
Adrenal medulla	3	71	0.675676	1.74676	0.247755	1	0.724469	1	NSA2; ACSL4; BRE;
N06cs110	1	87	0.225225	0.478343	0.882616	1	1	1	SEC24B;
Cerebellar cortex	2	59	0.45045	1.40365	0.421103	1	1	1	ARPP19; NMD3;
BOB2L	5	96	1.12613	2.15035	0.0842561	1	0.309304	1	ITIH2; KRT5; ALB; KRT10; KRT1;
Gastrointestinal tract	1	23	0.225225	1.80881	0.43184	1	1	1	LRP1;
Peripheral blood cells	2	140	0.45045	0.591595	0.857209	1	1	1	DDX10; CST7;
Syncytiotrophoblast	1	54	0.225225	0.77061	0.735123	1	1	1	LRP1;
Ascending colon	1	50	0.225225	0.832246	0.707692	1	1	1	SYNE1;
Neurons	5	68	1.12613	3.03565	0.0246004	1	0.113995	0.446441	ZMYND8; LRP1; GPHN; DRP2; STMN2;
Hematopoietic cells	3	22	0.675676	5.63552	0.0155156	1	0.0773956	0.303105	ALB; HBD; FASN;
Melanoma cells	1	47	0.225225	0.885357	0.685274	1	1	1	KRT10;
Nasal mucosa	3	24	0.675676	5.16609	0.0196787	1	0.0959053	0.375595	ABCC1; CA2; CAMP;
Umbilical cord	1	34	0.225225	1.22378	0.566556	1	1	1	SERPINB2;
Cornea	5	82	1.12613	2.51744	0.0491387	1	0.200335	0.784574	SERPINB2; TGFB3; KRT3; KRT4; AZU1;
Retinal pigmented epithelial cells	3	51	0.675676	2.43164	0.126411	1	0.425383	1	ABCC1; SLC16A3; SCD;
Decidua	1	43	0.225225	0.967697	0.652694	1	1	1	FASN;
16_clinprot_c8	7	92	1.57658	3.13957	0.00705347	1	0.0388399	0.152109	KRT6A; ITIH2; KRT5; ALB; KRT10; KRT14; KRT1;
Descending colon	1	56	0.225225	0.743093	0.747859	1	1	1	SYNE1;
Collecting duct	1	23	0.225225	1.80881	0.43184	1	1	1	CA2;
b1-SE_nonglyco_qstar	2	90	0.45045	0.920222	0.645789	1	1	1	ITIH2; ALB;
Eosinophils	6	100	1.35135	2.47639	0.0349263	1	0.15111	0.591793	CD69; FGR; PTPRJ; ALOX15; BRE; ITGAM;
Prostrate	1	15	0.225225	2.77286	0.308316	1	0.871507	1	CTSZ;
Occipital cortex	2	39	0.45045	2.12328	0.244233	1	0.71913	1	ARPP19; P2RY12;
AdducinII	4	116	0.900901	1.42441	0.310704	1	0.875339	1	ITIH2; ALB; KRT1; CSTB;
Granulosa lutein cells	2	28	0.45045	2.95713	0.147214	1	0.474669	1	SOAT1; LRP1;
Proximal convoluted tubule	1	32	0.225225	1.30024	0.544688	1	1	1	AK4;
Leydig cells	3	36	0.675676	3.44454	0.0561799	1	0.22472	0.880073	LRP1; CTSA; CA2;
Myeloid stem cell	1	16	0.225225	2.59967	0.325114	1	0.90097	1	CAMP;
Thyroid follicular cells	2	12	0.45045	6.89669	0.0330159	1	0.143577	0.562292	SOAT1; UBE2C;
BOB_Sensitivity	8	129	1.8018	2.55857	0.0134534	1	0.0691425	0.270784	KRT19; ITIH2; KRT5; ALB; KRT77; KRT10; KRT14; KRT1;
Pulmonary artery	1	15	0.225225	2.77286	0.308316	1	0.871507	1	F8A1;
Cellzome_Abl_inhibitors_NatureBiotechnology_exp143	1	87	0.225225	0.478343	0.882616	1	1	1	CDK2;
Skin fibroblasts	4	162	0.900901	1.01998	0.556048	1	1	1	ARSA; CTSA; THY1; ACAD8;
Alveolar macrophage	1	18	0.225225	2.31097	0.3575	1	0.968562	1	VAMP7;
Urothelium	2	33	0.45045	2.50922	0.19051	1	0.585334	1	FASN; SMPDL3A;
Islets of Langerhans	7	135	1.57658	2.13963	0.0465855	1	0.19654	0.769712	ZMYND8; KRT19; KRT18; ALB; KRT8; KRT10; CA2;
Atrium	2	146	0.45045	0.567284	0.872784	1	1	1	SYNE1; MSRA;
Parietal lobe	3	111	0.675676	1.11736	0.507393	1	1	1	FBXO7; SYNE1; MSRA;
Cardiac muscle	1	64	0.225225	0.650221	0.79298	1	1	1	DLG1;
Uterine myometrium	1	77	0.225225	0.540458	0.849762	1	1	1	ALOX15;
Sebaceous glands	3	29	0.675676	4.27569	0.0325145	1	0.142125	0.556607	CEBPB; SCD; FASN;
Neural stem cells	2	67	0.45045	1.23607	0.486192	1	1	1	AUP1; DHX36;
Spermatozoa	1	102	0.225225	0.408005	0.918952	1	1	1	CAMP;
Choroid plexus	1	18	0.225225	2.31097	0.3575	1	0.968562	1	ARPP19;
Large intestine	2	39	0.45045	2.12328	0.244233	1	0.71913	1	MYO9B; FASN;
Cytotrophoblasts	1	39	0.225225	1.06692	0.616749	1	1	1	LRP1;
Lymphoblast	1	13	0.225225	3.19913	0.273457	1	0.786074	1	IFIT1;
Bile duct	2	31	0.45045	2.67105	0.172966	1	0.54324	1	SOAT1; KRT19;
Mammary epithelium	7	75	1.57658	3.85111	0.00226696	1	0.0142399	0.0557678	ABCC1; CDK1; CELF1; RRM2; DSG1; JUP; HN1L;
Placental tissue	1	6	0.225225	6.92523	0.137063	1	0.454021	1	ABCC1;
Karpas 299	1	24	0.225225	1.73347	0.445644	1	1	1	KRT1;
Diaphragm	1	10	0.225225	4.15791	0.217856	1	0.652799	1	GAA;
Pancreatic duct epithelium	1	5	0.225225	8.30751	0.115596	1	0.396991	1	CA2;
Cochlea	1	28	0.225225	1.48592	0.497596	1	1	1	CCNK;
B lymphocytes	1	27	0.225225	1.54093	0.485082	1	1	1	PTPRJ;
Malignant pleural effusions	1	31	0.225225	1.34217	0.533345	1	1	1	ALB;
N06BJ504	4	78	0.900901	2.11827	0.121316	1	0.411505	1	CDK1; COG4; DLGAP4; CDK2;
Paracentral gyrus	1	48	0.225225	0.866916	0.692931	1	1	1	SYNE1;
Sweat glands	1	37	0.225225	1.12458	0.597408	1	1	1	CAMP;
Trophoblast	1	44	0.225225	0.945709	0.661141	1	1	1	SERPINB2;
Vascular endothelial cells	1	63	0.225225	0.66054	0.787814	1	1	1	THY1;
Tooth	1	32	0.225225	1.30024	0.544688	1	1	1	FUCA1;
Dentate gyrus	1	26	0.225225	1.60018	0.472257	1	1	1	ARPP19;
Vas deferens	2	17	0.45045	4.86944	0.0628537	1	0.241176	0.944521	CA2; CAMP;
Anterior pituitary	1	1	0.225225	41.2086	0.0242663	1	0.113065	0.442797	FASN;
Microglia	1	17	0.225225	2.44683	0.341506	1	0.937206	1	CTSB;
Colon mucosa	3	46	0.675676	2.69589	0.100405	1	0.356248	1	ORC4; CST7; CTSB;
Hypoglossal nucleus	1	3	0.225225	13.8275	0.0710503	1	0.266596	1	GPHN;
Seminiferous tubule	2	23	0.45045	3.5997	0.106448	1	0.376118	1	CYP51A1; FASN;
Intestinal epithelial cells	2	27	0.45045	3.06661	0.138818	1	0.456272	1	KRT10; KRT1;
Spermatids	1	38	0.225225	1.09499	0.607197	1	1	1	CAMP;
Reticulocytes	2	25	0.45045	3.31184	0.122369	1	0.413421	1	ASNS; ALOX15;
Pancreatic acinus	2	17	0.45045	4.86944	0.0628537	1	0.241176	0.944521	MAN2A1; SOAT1;
Umbilical vein	1	10	0.225225	4.15791	0.217856	1	0.652799	1	PRTN3;
BOB2L_ISB	7	87	1.57658	3.31999	0.00521293	1	0.0296739	0.116212	KRT19; ITIH2; KRT5; ALB; KRT10; KRT14; KRT1;
Insular cortex membrane micro domains	4	75	0.900901	2.20299	0.109158	1	0.382504	1	DSG1; ALB; THY1; FTL;
Duodenum epithelium	1	7	0.225225	5.93732	0.15801	1	0.505633	1	FASN;
Breast cancer cells	1	36	0.225225	1.15581	0.587375	1	1	1	PFN2;
Zona fasciculata	1	11	0.225225	3.78026	0.236846	1	0.702258	1	FASN;
Alveolus	1	14	0.225225	2.97078	0.2911	1	0.828366	1	SOAT1;
Lung epithelium	1	9	0.225225	4.61938	0.198395	1	0.60736	1	KRT18;
Articular cartilage	2	17	0.45045	4.86944	0.0628537	1	0.241176	0.944521	CTSB; SLC2A3;
Subthalamus	1	10	0.225225	4.15791	0.217856	1	0.652799	1	NMD3;
Osteoclast	1	18	0.225225	2.31097	0.3575	1	0.968562	1	CA2;
Cerebrum	2	30	0.45045	2.76005	0.164298	1	0.523776	1	CTSA; SLC2A3;
Nasal tissue epithelial cells	2	24	0.45045	3.44978	0.114337	1	0.396991	1	PCNA; CAMP;
Renal tubule	2	18	0.45045	4.59907	0.0696066	1	0.264692	1	SOAT1; CA2;
Urinary tract	1	3	0.225225	13.8275	0.0710503	1	0.266596	1	SOAT1;
051503_BAL20_gly_lec	1	30	0.225225	1.38689	0.52172	1	1	1	ITIH2;
Seminal plasma	1	8	0.225225	5.19608	0.17845	1	0.554306	1	CAMP;
Basophils	2	28	0.45045	2.95713	0.147214	1	0.474669	1	CCR4; CD69;
Midbrain	2	14	0.45045	5.91215	0.0440982	1	0.187916	0.735939	GPHN; CTSA;
Dermal microvascular endothelial cells	1	14	0.225225	2.97078	0.2911	1	0.828366	1	THY1;
Small intestine epithelium	1	5	0.225225	8.30751	0.115596	1	0.396991	1	PCNA;
Submucosa	1	6	0.225225	6.92523	0.137063	1	0.454021	1	CAMP;
Colon epithelium	2	32	0.45045	2.5876	0.181706	1	0.560314	1	KRT18; ACSL4;
Parietal cells	1	6	0.225225	6.92523	0.137063	1	0.454021	1	CA2;
Enterocyte	1	16	0.225225	2.59967	0.325114	1	0.90097	1	MAN2A1;
Gonadotroph	1	2	0.225225	20.7068	0.047945	1	0.198329	0.776717	CEBPB;
Cerebral neurons	1	7	0.225225	5.93732	0.15801	1	0.505633	1	FASN;
HUPO28_b1-CIT	2	37	0.45045	2.23802	0.226202	1	0.673801	1	ITIH2; ALB;
Lymphoid stem cell	2	17	0.45045	4.86944	0.0628537	1	0.241176	0.944521	LRP1; DUT;
Adenohypophysis	1	13	0.225225	3.19913	0.273457	1	0.786074	1	FASN;
Lactiferous ducts	1	4	0.225225	10.3792	0.0935962	1	0.336312	1	FASN;
Mucous cell	1	5	0.225225	8.30751	0.115596	1	0.396991	1	CAMP;
Vagus nucleus	1	2	0.225225	20.7068	0.047945	1	0.198329	0.776717	GPHN;
Centromedial amygdaloid complex	1	2	0.225225	20.7068	0.047945	1	0.198329	0.776717	ARPP19;
Pre-B cells	1	4	0.225225	10.3792	0.0935962	1	0.336312	1	GTF2H4;
Peripheral blood lymphocytes	1	3	0.225225	13.8275	0.0710503	1	0.266596	1	CKAP2;
Anagen follicle	1	2	0.225225	20.7068	0.047945	1	0.198329	0.776717	KRT75;
Lymphoid	1	4	0.225225	10.3792	0.0935962	1	0.336312	1	LRP1;
Osteoclasts	1	1	0.225225	41.2086	0.0242663	1	0.113065	0.442797	CA2;
Epididymidis	1	1	0.225225	41.2086	0.0242663	1	0.113065	0.442797	CA2;
Ductus deferens	1	1	0.225225	41.2086	0.0242663	1	0.113065	0.442797	CA2;
Semicircular canal	1	1	0.225225	41.2086	0.0242663	1	0.113065	0.442797	CCNK;
Liver endothelium	1	1	0.225225	41.2086	0.0242663	1	0.113065	0.442797	MRC1;

## Sheet: Transcription factor
Analysis: Transcription factor
Dataset name: LysateBanLecp005
Number of genes in the dataset: 444
Number of genes in the dataset (which are available in Transcription factor database) :405
Number of genes in background: 15253
Is analysis quantitative: No
						Corrected p-values
Transcription factor	No. of genes in the dataset	No. of genes in the background dataset	Percentage of genes	Fold enrichment	P-value (Hypergeometric test)	Bonferroni method	BH method	Q-value (Storey-Tibshirani method)	genes mapped (from input data set)
ELF1	31	585	7.65432	1.99631	0.00020843	0.0437703	0.0437703	0.0794541	ASAP2; BRI3BP; CDV3; EIF4EBP1; EIF4ENIF1; KLF13; LAG3; LIMS1; MRPL24; NUFIP2; ORC4; RAC1; RGS3; RSRC2; SHOC2; STX5; TBC1D2B; TXNIP; WDHD1; ZMYND8; SERPINB2; SYNE1; BMI1; RCL1; THADA; FCGR2B; ACSL4; UBAP2L; CTSA; HNMT; APOBR;
E2F1	49	1188	12.0988	1.55365	0.00134665	0.282797	0.141398	0.256674	BCL2L1; CCNK; CDK13; CDK6; CENPH; CHEK1; COG4; DLGAP4; DPCD; EHMT2; FANCD2; FANCI; FAR1; FBXO7; FTSJ3; IPO11; KIAA0101; MMAB; MORF4L1; NDC1; NUFIP2; POLA1; PRCC; RB1; RGS3; RMI2; RRM2; SHOC2; SOAT1; TIMELESS; TMEM41B; TNIK; VTI1A; WDR76; DGCR8; GEMIN6; ZNRF2; RRM1; DUT; UHRF1; TYMS; NOLC1; MCM3; MCM4; MCM2; CTSC; PCNA; MCM5; POLA2;
MAFB	7	352	1.7284	0.749985	0.829731	1	1	1	NUFIP2; ORC4; POLA1; RGS3; RIF1; USP8; NOLC1;
NFIC	53	2040	13.0864	0.978623	0.591087	1	1	1	ABCD3; ANKHD1; CASP2; CD69; CDK6; CEND1; CLK3; COX6A1; DDX31; DES; DPH5; ETV6; FAM98A; FANCI; FBXW11; GALT; GRIPAP1; HLA-DRB1; KAT7; LPGAT1; MAN2A1; NUFIP2; PRCC; PUM1; RGS3; SHOC2; STX5; TNIK; XPO6; ZMYND8; FGR; KRT13; LRP1; MYH2; BMI1; EZH1; GPHN; MFF; NEDD9; PTPRJ; THADA; AP1S2; KRT5; IL2RA; CTSH; PAPSS2; CDK2; CAMP; CTSS; SEMA4A; GALM; SLC2A3; SEPT3;
NR1H3	24	1020	5.92593	0.886498	0.760897	1	1	1	BCKDHB; ELP5; GALT; GRSF1; HDAC3; HPDL; KAT7; KDM3B; PEX14; PLCB3; POLA1; TOMM40; VAMP3; BLOC1S1; LRP1; CCDC9; ELOVL1; TGFB3; ADAMTSL4; UBAP2L; AK4; BRE; SSH1; ACAD8;
PITX3	2	265	0.493827	0.285643	0.993726	1	1	1	THADA; AP1S2;
RXRA	25	1113	6.17284	0.846261	0.836003	1	1	1	BCKDHB; CEND1; DPCD; ELP5; GALT; KAT7; NAA40; PEX14; PLCB3; POLA1; TOMM40; VAMP3; LRP1; ELOVL1; IVNS1ABP; NEDD9; MKRN3; ARVCF; UBAP2L; AK4; SKAP2; BRE; SSH1; ACAD8; NAGA;
SOAT1	39	1261	9.62963	1.16506	0.178254	1	1	1	ANKHD1; BCL2L1; C21orf59; DCAF13; DPCD; EHMT2; ETV6; FAM98A; FANCD2; GTF2H4; HLA-DRB1; MAN1A1; NUFIP2; ORC4; POLA1; RGS3; SRBD1; SYNJ2BP; TMEM41B; ZCCHC6; ZFP36L1; ZMYND8; KRT6A; ADA; ARHGEF7; CLPB; RPS15A; TGFB3; THADA; LRP5; FCGR2B; KRT8; RPL38; CEP85; UBAP2L; MCM3; MTHFD2; CA1; RORA;
STAT1	39	1261	9.62963	1.16506	0.178254	1	1	1	ANKHD1; BCL2L1; C21orf59; DCAF13; DPCD; EHMT2; ETV6; FAM98A; FANCD2; GTF2H4; HLA-DRB1; MAN1A1; NUFIP2; ORC4; POLA1; RGS3; SRBD1; SYNJ2BP; TMEM41B; ZCCHC6; ZFP36L1; ZMYND8; KRT6A; ADA; ARHGEF7; CLPB; RPS15A; TGFB3; THADA; LRP5; FCGR2B; KRT8; RPL38; CEP85; UBAP2L; MCM3; MTHFD2; CA1; RORA;
DLX2	3	171	0.740741	0.66288	0.836216	1	1	1	CDK13; GRSF1; KRT6A;
DLX3	14	413	3.45679	1.27752	0.210402	1	1	1	ANKHD1; DLGAP4; FBXO7; FUBP1; SPIN3; ZCCHC6; ZFP36L1; MYH2; SERPINB2; SYNE1; CUL3; THADA; LRP5; HNMT;
ETS1	71	2496	17.5309	1.07143	0.279312	1	1	1	ARID2; ARPP19; ASAP2; ATM; AURKB; BCL2L1; CASP2; CDK12; CDK13; CHAF1B; CRTC2; DDX19B; DES; DLG1; DLGAP4; DPCD; ELP5; FANCD2; IPO11; KIF4A; KLF13; LAG3; LIMS1; LIN7C; MAN2A1; MRPL24; MRPL54; MYL12B; NCAPD3; ORC4; PDK3; PRCC; PSAT1; PUM1; RAC1; RGS3; SHOC2; SRBD1; STX5; SZRD1; TOMM40; TUBGCP4; VTI1A; ZCCHC6; ZMYND8; BCL2L15; DSG1; NUP37; VAV2; CCDC9; CEP170; ELOVL1; METTL13; NEDD9; TGFB3; AP1S2; LR…
HNF1A	23	831	5.67901	1.0428	0.44926	1	1	1	CDC42SE2; CDK6; DLG1; EIF4ENIF1; FAM162A; HN1; KDM3B; NOC2L; POLA1; PUM1; RPRD2; ZMYND8; BCL2L15; MYH2; BMI1; IVNS1ABP; THADA; ALB; UBAP2L; STMN2; LGALS3; HMGCS1; MRPS9;
HOXC9	15	573	3.7037	0.986525	0.560125	1	1	1	DUSP12; FANCD2; IPO11; NMD3; PEX14; PUM1; BMI1; CD226; THADA; DUT; SKAP2; CA1; CREG1; CD320; MRPS9;
IRF1	20	811	4.93827	0.929203	0.666735	1	1	1	ANKHD1; BCL2; CDK6; FAM98A; FBXO7; GRIPAP1; PDK3; PHF14; RGS3; SOAT1; CPT1A; DTX3L; IFIT1; SYNE1; CHST11; HERC6; THADA; ZNRF2; FCGR2B; KRT10;
LHX3	28	1210	6.91358	0.871794	0.804133	1	1	1	ANKHD1; ARID2; DAPL1; DES; DLG1; DPCD; ETV6; FAM98A; FCF1; LIMS1; NOC2L; PDK3; POLA1; RFK; SRSF12; ZMYND8; DSG1; SYNE1; CUL3; THADA; AP1S2; KRT3; ALB; UHRF1; F13A1; CA1; RORA; ANXA1;
MEF2A	44	1835	10.8642	0.903239	0.788802	1	1	1	ANKHD1; ARPP19; ATM; CEBPB; CYP51A1; DAPL1; DDX18; DLG1; FBXO7; FBXW11; FUBP1; LARP4B; MIER1; NAA40; ORC4; OXA1L; PDK3; POLA1; PRKCA; PUM1; RGS3; RIF1; TRAT1; ZCCHC6; DSG1; FGR; HS1BP3; MYH2; SYNE1; CEP170; CUL3; EZH1; THADA; AP1S2; ARHGEF15; KRT5; SLC16A3; CEP85; UBAP2L; F13A1; KIAA0196; SSH1; CELA3A; MRPS9;
NKX6-1	37	1408	9.1358	0.989927	0.552511	1	1	1	ABCD3; ANKHD1; DAPL1; DCUN1D5; DES; DLG1; DUSP12; ETV6; FAM98A; NOC2L; PEX14; PHF14; PSMD5; PUM1; RIF1; RNASEH2B; TNIK; WDR76; ZCCHC6; ZMYND8; DSG1; SYNE1; CD226; CUL3; ICOS; MFF; NBN; THADA; VWA9; AP1S2; LRP5; MCM3; LGALS3; HEXB; SKAP2; CTSS; MRPS9;
OTX2	15	324	3.7037	1.74467	0.0267278	1	0.83535	1	CDK6; DLG1; KIF1BP; MED14; PRCC; PUM1; ZMYND8; BMI1; THADA; KRT3; UBAP2L; CA1; RORA; CD14; ANXA1;
PHOX2A	9	442	2.22222	0.767684	0.834374	1	1	1	ANKHD1; DLG1; DLGAP4; NOC2L; TNIK; ZCCHC6; THADA; CD14; ANXA1;
POU2F1	59	2209	14.5679	1.00605	0.502359	1	1	1	ABCD3; ANKHD1; BCL2; CDK13; CDK6; CDV3; CELF1; DAPL1; DLG1; DLGAP4; DPCD; EHMT2; EIF4ENIF1; FAM162A; FAM98A; FBXO7; FBXW11; FUBP1; HN1; IPO11; KDM3B; KIAA0101; MRPS18B; NUFIP2; PDK3; POLA1; PRKCA; PUM1; REXO4; RGS3; RIF1; SHOC2; SRBD1; STK17A; TBC1D2B; ZCCHC6; ZMYND8; MYH2; SERPINB2; SYNE1; BMI1; CUL3; FNBP4; GEMIN6; MFF; NBN; NEDD9; THADA; DAB2; CEP128; UBAP2L; AK4; STMN2; CDK2; SKAP2; IL1B; SEM…
POU3F2	18	789	4.44444	0.859649	0.780014	1	1	1	ABCD3; ANKHD1; CDK13; DAPL1; DLG1; FUBP1; NOC2L; NUFIP2; PDK3; PUM1; TNIK; ABHD4; CEP170; NBN; THADA; ALB; CD14; ANXA1;
SRF	9	462	2.22222	0.734452	0.868996	1	1	1	BCL2; PLCB3; SRBD1; SYNE1; GPHN; JUP; SKAP2; APOBR; TGM3;
ARID3A	24	1250	5.92593	0.723383	0.967223	1	1	1	ABCD3; ARPP19; CYP51A1; DES; DLG1; DPH5; HDAC3; IPO11; LIMS1; MIER1; NUFIP2; ORC4; PEX14; PHF14; DSG1; SYNE1; CD226; MFF; THADA; AP1S2; ALB; ACSL4; RORA; STK38;
EHF	30	753	7.40741	1.50091	0.0176393	1	0.740852	1	ANKHD1; C21orf59; CDK13; CELF1; COX6A1; DPCD; FTSJ3; KAT7; LARP4B; MIER1; SHOC2; TMEM41B; TUBGCP4; WDR73; ZCCHC6; ARHGEF7; FUCA2; NUP37; TSTD1; CSNK1G1; ZNRF2; CCDC94; KRT18; HARS2; JUP; IFI30; RNASE6; TJP3; CTSS; RORA;
FOXA1	19	804	4.69136	0.890452	0.733314	1	1	1	ABCD3; DLGAP4; FUBP1; ORC4; PUM1; RIF1; RNASEH2B; DSG1; CEP170; ITIH2; NEDD9; TGFB3; THADA; LRP5; DRP2; DAB2; SKAP2; ANXA1; MRPS9;
ATF1	29	1037	7.16049	1.05355	0.413183	1	1	1	AURKB; BRI3BP; CRTC2; DDX10; DDX19B; DHX36; ELP5; HN1; IPO11; KIF4A; MRPL54; SRBD1; TTC1; VAMP7; CYSTM1; CCNA2; MFF; RFX1; TGFB3; THADA; VWA9; ZNF740; NOLC1; PAPSS2; CDK2; BRE; ASAH1; MTHFD2; RORA;
CREB1	26	973	6.41975	1.00673	0.516207	1	1	1	AURKB; CDV3; DDX10; DHX36; ELP5; HN1; KAT7; KLF13; MMAB; PRCC; RNASEH2B; SLC35E1; SZRD1; TTC1; VAMP7; ACAD9; CYSTM1; CCNA2; PMVK; RFX1; THADA; IFI30; NOLC1; PCNA; TRMT10C; BRE;
JDP2	21	763	5.18519	1.03702	0.464761	1	1	1	CDK6; DDX10; DHX36; DPCD; GRIPAP1; HN1; MMAB; TTC1; VAMP7; ACAD9; ARHGEF7; CYSTM1; TMBIM1; MFF; RFX1; THADA; AP1S2; KPNA2; NOLC1; BRE; PCNP;
NFYA	78	2544	19.2593	1.15484	0.0910911	1	1	1	AURKB; BCKDHB; BCL2L1; C9orf78; CASP2; CCNK; CDK1; CDV3; CELF1; CKAP2; CRTC2; DDX10; DHCR24; DLG1; DPCD; EBP; EIF4ENIF1; ETV6; F8A1; FANCD2; FAR1; GALT; HLA-DRB1; KAT7; KDM3B; KIAA0101; KIF1BP; KIF23; MMAB; MRPS18B; NCAPD3; ORC4; PDK3; POLA1; PSAT1; PUM1; PYCR1; RGS3; RMI2; RPRD2; SLC35E1; STX5; THUMPD3; TOMM40; TXNIP; UBE2C; ZMYND8; ARHGEF7; CPT1A; FUCA2; KRT19; SYNE1; CD226; CUL3; DGCR8; DHCR7;…
PLAU	29	1037	7.16049	1.05355	0.413183	1	1	1	AURKB; BRI3BP; CRTC2; DDX10; DDX19B; DHX36; ELP5; HN1; IPO11; KIF4A; MRPL54; SRBD1; TTC1; VAMP7; CYSTM1; CCNA2; MFF; RFX1; TGFB3; THADA; VWA9; ZNF740; NOLC1; PAPSS2; CDK2; BRE; ASAH1; MTHFD2; RORA;
RORA	31	1168	7.65432	0.999873	0.528651	1	1	1	CDK6; COX6A1; CRTC2; DPCD; DSCC1; FBXW11; GALT; KDM3B; KIF1BP; LIMS1; MED14; MMP14; ORC4; PSMD5; SEC24B; SHOC2; ZFP36L1; SYNE1; TSTD1; BMI1; FNBP4; IVNS1ABP; METTL13; NEDD9; THADA; VWA9; AP1S2; DAB2; SKAP2; RORA; STK38;
YY1	43	1317	10.6173	1.2299	0.091147	1	1	1	ARPP19; AUP1; CCNK; CDC42SE2; CELF1; DHCR24; DLG1; DLGAP4; FTSJ3; FUBP1; IPO11; KAT7; LARP4B; LEMD2; LIMS1; MAN2A1; MORF4L1; NUFIP2; PFN2; QTRT1; RAC1; RPRD2; RSRC2; SZRD1; TTC1; UNC119B; XPO6; ZMYND8; BMI1; CCNA2; CLPB; GEMIN6; RFX1; RPS15A; RRM1; UHRF1; NOLC1; UBAP2L; AK4; PCNA; MCM5; YBX1; FTL;
ELK1	65	1986	16.0494	1.23279	0.0419636	1	0.979152	1	ANAPC4; ANKHD1; ARID2; ATM; AURKB; BCL2L1; C1orf112; CDK13; CDK6; CELF1; COG4; COX6A1; CRTC2; DPCD; ELP5; FANCD2; FANCI; FAR1; FBXW11; HDAC3; KAT7; KIAA0101; LARP4B; LIN7C; MRPL24; NSA2; PFN2; PHAX; PLCB3; POLA1; PRCC; RAC1; RIF1; SHOC2; SLC35E1; STX5; TMEM41B; TOMM40; TUBGCP4; VTI1A; WDR73; XPO6; ZCCHC6; ARHGEF7; ARSA; FGR; SYNE1; CCDC9; CSNK1G1; IVNS1ABP; NEDD9; ZNRF2; AP1S2; UTP3; AZU1; HARS2;…
GABPA	86	2702	21.2346	1.19881	0.0369898	1	0.970983	1	ANAPC4; ATM; AURKB; BCL2L1; C1orf112; C21orf59; CAAP1; CASP2; CCNK; CDK13; CELF1; COG4; COX6A1; DCUN1D5; DDX10; DDX18; DDX19B; DLG1; DPCD; EIF4ENIF1; ELP5; FANCI; FBXO7; FCF1; FTSJ3; GALT; GBP6; HCCS; KAT7; KIF23; KIF4A; LARP4B; MAN1A1; MAN2A1; MRPL24; MRPS18B; MRPS26; NCAPD3; NOB1; NSA2; NTMT1; PAIP2; PEX14; PHAX; PSMG3; RB1; REXO4; RIF1; RNASEH2B; SEC24B; SHOC2; SLC35E1; SRBD1; SZRD1; THUMPD3; …
CTCF	60	2605	14.8148	0.867569	0.903942	1	1	1	ANAPC4; BCL2L1; C9orf78; CEBPB; CLK3; DDX18; DLGAP4; DPCD; EHMT2; EIF4ENIF1; FBXO7; FTSJ3; GALT; KAT7; KDM3B; MAN1A1; MIER1; MMP14; NDC1; NOB1; NUDT15; ORC4; PEX14; PLCB3; PRCC; PRMT3; QTRT1; RGS3; RIF1; SEC24B; TARS2; WDR73; ARHGEF7; FGR; GAA; HS1BP3; LRP1; MAVS; POLR2J; VAV2; DGCR8; FNBP4; NBN; VWA9; S100A2; ST6GALNAC2; UTP3; DAB2; UHRF1; RPL38; NPM3; CEP85; FUCA1; MCM3; MCM4; KRT14; CTSA; UBAS…
FEV	16	526	3.95062	1.14627	0.324053	1	1	1	BCL2; DAPL1; ETV6; LIMS1; LIN7C; RAC1; RGS3; RNASEH2B; TRAT1; XPO6; ZMYND8; FGR; KRT18; SKAP2; HNMT; BRE;
HERPUD1	8	421	1.97531	0.716523	0.874829	1	1	1	ARID2; BCL2L1; DLGAP4; MORF4L1; RFK; FGR; NEDD9; HMGCS1;
KLF7	131	4448	32.3457	1.10925	0.0857149	1	1	1	ANAPC4; ANKHD1; ATM; BCKDHB; C9orf78; CD82; CDK2AP1; CEBPB; CHAF1B; CHEK1; CKAP2; CYP51A1; DCUN1D5; DLGAP4; DPCD; EBP; FAM98A; FTSJ3; GALT; GRIPAP1; HDAC3; INTS2; KIF4A; KLF13; LIMS1; LIN7C; MAN1A1; MAN2A1; MED14; MORF4L1; MRPL2; NAA40; NDEL1; NOB1; NUFIP2; ORC4; PAIP2; PEX14; PLCB3; POLA1; PRMT3; PYCR1; RAD9A; RANBP6; RGS3; RMI2; RPRD2; RSRC2; SHOC2; SRSF12; STX5; SZRD1; TIMELESS; TMEM41B; TOMM3…
MAF	12	466	2.96296	0.970594	0.584751	1	1	1	FTSJ3; PFN2; TTC1; FGR; LRP1; TMBIM1; ABHD4; S100A2; KRT18; STMN2; CD14; FTL;
NANOG	7	204	1.7284	1.29407	0.299026	1	1	1	GALT; RAC1; TNIK; FGR; TGFB3; TUBAL3; RORA;
NR5A1	26	1129	6.41975	0.867626	0.803728	1	1	1	COX6A1; DLGAP4; DPCD; ELP5; FANCD2; LPGAT1; MRPL2; NTMT1; PEX14; PRMT3; RGS3; RPRD2; SPATA5L1; THUMPD3; TOMM40; VAMP3; FGR; KLC4; MAVS; NUP37; THADA; ADAMTSL4; SLC16A3; CA2; CAMP; PPIF;
RFX1	52	2158	12.8395	0.90766	0.797662	1	1	1	BCKDHB; BCL2L1; CDK1; CDK12; CEBPB; CENPH; CENPK; DAPL1; DDX10; DLG1; DLGAP4; DPCD; EIF4ENIF1; ELP5; FAM98A; FTSJ3; IPO11; KIF1BP; MMAB; NAA40; ORC4; PDK3; PLCB3; PUM1; QTRT1; RFK; RIF1; SRSF12; ZMYND8; CYSTM1; FGR; MYH2; SYNE1; BMI1; CSNK1G1; DGCR8; METTL13; MFF; DRP2; ARVCF; DAB2; UBAP2L; LGALS3; FASN; SKAP2; CA2; HMGCS1; POLA2; SEMA4A; ANXA1; PCNP; NAGA;
RREB1	57	2136	14.0741	1.00517	0.505877	1	1	1	ARID2; CD69; CDK6; CRTC2; DES; DHCR24; EIF4EBP1; ELP5; ETV6; FUBP1; HN1; KDM3B; LAG3; MMP14; NOC2L; NUFIP2; PLCB3; PSMG3; PUM1; RGS3; RIF1; RNASEH2B; RSRC2; TNIK; ZFP36L1; ZMYND8; FGR; RAP1GAP2; SYNE1; TMBIM1; CHST11; CSNK1G1; PLP2; RCL1; RFX1; ARHGEF15; S100A2; KRT5; KRT82; ARVCF; DAB2; KRT77; ADAMTSL4; JUP; UBAP2L; PAPSS2; CDK2; CTSA; SKAP2; CAMP; HNMT; BRE; SSH1; RORA; APOBR; FTL; CD320;
SF1	26	1129	6.41975	0.867626	0.803728	1	1	1	COX6A1; DLGAP4; DPCD; ELP5; FANCD2; LPGAT1; MRPL2; NTMT1; PEX14; PRMT3; RGS3; RPRD2; SPATA5L1; THUMPD3; TOMM40; VAMP3; FGR; KLC4; MAVS; NUP37; THADA; ADAMTSL4; SLC16A3; CA2; CAMP; PPIF;
SP1	205	7140	50.6173	1.08135	0.0661925	1	1	1	ANAPC4; ANKHD1; ARID2; ATM; AURKB; BCL2; BORA; BRI3BP; C9orf78; CASP2; CCNK; CD69; CD82; CDC42SE2; CDK12; CDK2AP1; CDK6; CDV3; CEBPB; CELF1; CHAF1B; CHEK1; CKAP2; CRTC2; CYP51A1; DAPL1; DDX31; DES; DLG1; DLGAP4; DPCD; DSCC1; DUS3L; EBP; EIF4ENIF1; ELP5; ETV6; FAM98A; FBXW11; FTSJ3; FUBP1; GALT; GRIPAP1; GRSF1; HCCS; HDAC3; HN1; HPDL; INTS2; IPO11; KDM3B; KIF1BP; KLF13; LAG3; LEMD2; LIN7C; MAN1A1;…
SP4	110	4345	27.1605	0.953523	0.742312	1	1	1	ANKHD1; ARID2; BCL2; BORA; C9orf78; CD69; CD82; CDK12; CDK6; CDV3; CEBPB; CHAF1B; DES; DLGAP4; DPCD; DSCC1; DUS3L; EBP; GALT; GRIPAP1; HDAC3; HN1; INTS2; IPO11; KDM3B; KIAA0101; KLF13; LAG3; LIMS1; LIN7C; MAN1A1; MAN2A1; MIER1; MORF4L1; MRPL2; MRPS26; NAA40; NDEL1; NTMT1; NUFIP2; ORC4; PFN2; PLCB3; POLA1; PRMT3; PYCR1; RAD9A; RFK; RGS3; RIF1; RRM2; SLC35E1; SOAT1; STX5; TIMELESS; TMEM41B; TOMM34;…
TCF3	52	2140	12.8395	0.915295	0.77788	1	1	1	ABCD3; ANKHD1; DAPL1; DLG1; DLGAP4; DPCD; EIF4ENIF1; ELP5; FAM98A; HDAC3; NAA40; NCAPD3; PFN2; PLCB3; RB1; RGS3; ZMYND8; BLOC1S1; CPT1A; FGR; KRT19; LRP1; VAV2; CCDC9; PLP2; SAP130; TGFB3; THADA; ZNF740; DNASE1; LRP5; S100A2; ST6GALNAC2; DRP2; KRT79; ARVCF; KRT36; CTSH; NPM3; CDK2; SELENBP1; PCNA; UBASH3B; SKAP2; CA1; MRTO4; PPT1; CELA3A; CD320; SEPT3; TGM3; MRPS9;
OTX1	22	848	5.4321	0.977482	0.57677	1	1	1	ABCD3; DLG1; FAM162A; IPO11; MIER1; NOC2L; ORC4; PDK3; PEX14; PUM1; RNASEH2B; TMEM70; THADA; AP1S2; KRT3; DUT; UHRF1; UBAP2L; MCM3; PAPSS2; CD14; MRPS9;
PITX1	22	848	5.4321	0.977482	0.57677	1	1	1	ABCD3; DLG1; FAM162A; IPO11; MIER1; NOC2L; ORC4; PDK3; PEX14; PUM1; RNASEH2B; TMEM70; THADA; AP1S2; KRT3; DUT; UHRF1; UBAP2L; MCM3; PAPSS2; CD14; MRPS9;
EGR1	81	3215	20	0.948956	0.72356	1	1	1	ANKHD1; BCL2; BCL2L1; C9orf78; CCNK; CDK6; CEBPB; DES; DHCR24; DLG1; DLGAP4; DUS3L; ELP5; FAM98A; FANCI; GALT; GRSF1; HDAC3; HN1; KAT7; KDM3B; LARP4B; MAN1A1; MAN2A1; MIER1; MMP14; MRPL2; MYL12B; NAA40; NDEL1; NUFIP2; ORC4; PHAX; PLCB3; PRCC; PRMT3; PSMG3; RAD9A; RB1; RIF1; SHOC2; STX5; TNIK; TOMM34; WDHD1; ZFP36L1; ZMYND8; CPT1A; KLC4; LRP1; SYNE1; TSTD1; VAV2; BMI1; CSNK1G1; EZH1; GEMIN6; IVNS1…
NKX2-1	15	711	3.7037	0.795051	0.853486	1	1	1	CDK13; DLG1; EIF4ENIF1; KIF1BP; LEMD2; PDK3; PHF14; PLCB3; MYH2; CUL3; THADA; KRT36; CTSC; HMGCS1; ANXA1;
NRF1	61	2037	15.0617	1.12797	0.170664	1	1	1	ABCD3; BCKDHB; CASP2; CDV3; COX6A1; DDX10; DDX18; DUS3L; EBP; EIF4ENIF1; ELP5; FAM98A; FBXO7; FBXW11; FTSJ3; INTS2; IPO11; KAT7; KIF23; LARP4B; MIER1; MRPL54; MRPS18B; NAA40; NCAPD3; NDC1; NOB1; NTMT1; PAIP2; PHF14; POLA1; RMI2; RPRD2; SPATA5L1; TIMELESS; TMEM70; TUBGCP4; ZWINT; ACAD9; GAA; LRP1; POLR2J; CCNA2; CEP170; DHCR7; EZH1; FNBP4; GEMIN6; ARHGEF15; DSN1; UHRF1; CEP85; MSRA; PCNA; FASN; SK…
BACH1	11	648	2.71605	0.639875	0.96057	1	1	1	PDK3; PRCC; LRP1; NPL; ABHD4; THADA; KRT5; ALB; KRT8; ANXA1; FTL;
HOXB4	17	718	4.19753	0.892203	0.721744	1	1	1	ANKHD1; DAPL1; DES; DLG1; DLGAP4; NOC2L; POLA1; PUM1; RIF1; TNIK; ZCCHC6; ZMYND8; CEP170; RPS15A; THADA; CD14; ANXA1;
MEIS2	13	527	3.20988	0.929712	0.646957	1	1	1	AUP1; CD82; DPCD; POLA1; RB1; SEC24B; SYNE1; BMI1; THADA; UBAP2L; CDK2; KRT1; SEMA4A;
NR4A2	34	1042	8.39506	1.22921	0.123696	1	1	1	CDK13; CDK6; CEND1; COX6A1; DLGAP4; DPH5; FANCD2; GRSF1; MRPL2; NUFIP2; PRMT3; PSMD5; RPRD2; TMEM41B; TOMM40; ZMYND8; KLC4; MAVS; NUP37; SYNE1; CHST11; RFX1; THADA; AP1S2; DNASE1; PDPR; ADAMTSL4; SLC16A3; ASF1B; SKAP2; CA1; APOBR; SLC2A3; MRPS9;
PPARA	8	370	1.97531	0.815284	0.770413	1	1	1	GALT; LIMS1; NCAPD3; TOMM40; DSG1; ELOVL1; KRT5; BRE;
PPARG	46	2016	11.358	0.859507	0.885399	1	1	1	BCKDHB; CDK13; CRTC2; DDX10; DLG1; GALT; HDAC3; KAT7; LAG3; LIMS1; MRPL2; NCAPD3; PDK3; PEX14; POLA1; PRCC; RGS3; TBC1D2B; THUMPD3; TOMM40; TXNIP; ZMYND8; ACAD9; DSG1; KLC4; LRP1; TSTD1; ELOVL1; IVNS1ABP; NEDD9; RCL1; THADA; KRT5; KRT79; ARVCF; KRT4; ADAMTSL4; RPL38; AK4; PAPSS2; CAMP; BRE; YBX1; IL1B; SSH1; GALM;
HSF1	28	806	6.91358	1.30877	0.0885539	1	1	1	ARID2; C9orf78; COG4; DLG1; EHMT2; GRIPAP1; KAT7; LIMS1; LPGAT1; MRPL2; MYL12B; PDK3; ZFP36L1; ZMYND8; KLC4; LRP1; RAP1GAP2; TMBIM1; CEP170; CUL3; GPHN; AP1S2; KRT18; JUP; MRC1; SEMA4A; SSH1; PCNP;
ETV7	40	1049	9.87654	1.43641	0.0132506	1	0.695657	1	BCL2L1; C21orf59; CAAP1; CDC42SE2; CDK13; DCUN1D5; DES; DLG1; DPCD; ELP5; IPO11; KAT7; KIF23; LARP4B; NSA2; NTMT1; NUDT15; PAIP2; PSMG3; RGS3; SHOC2; TMEM41B; VTI1A; XPO6; ZCCHC6; ZMYND8; ARHGEF7; VAV2; CCDC9; CSNK1G1; NEDD9; THADA; MKRN3; DRP2; RNASE6; PAPSS2; SELENBP1; SKAP2; HNMT; CTSS;
NR5A2	11	486	2.71605	0.853163	0.747569	1	1	1	ARID2; COX6A1; DLGAP4; DPCD; ELP5; FUBP1; PUM1; RGS3; THADA; CAMP; CELA3A;
TEAD1	17	422	4.19753	1.518	0.0585752	1	1	1	CDK6; FUBP1; HN1; KIF23; MED14; MRPL2; PDK3; SEC24B; SZRD1; TBC1D2B; KLC4; PTPRJ; RFX1; TGFB3; DAB2; NPM3; KRT14;
TFAP2A	5	258	1.23457	0.731292	0.818982	1	1	1	CRTC2; KAT7; PLCB3; LRP1; STMN2;
ARNT	12	403	2.96296	1.12232	0.384005	1	1	1	ANKHD1; ORC4; QTRT1; RAD9A; BLOC1S1; CPT1A; GAA; BMI1; DGCR8; DNASE1; PPIF; GALNS;
BARX1	8	382	1.97531	0.789674	0.799438	1	1	1	ABCC1; EHMT2; PRKCA; ZCCHC6; IVNS1ABP; KRT10; CA2; MRPS9;
BSX	6	268	1.48148	0.844527	0.719682	1	1	1	FANCD2; GRSF1; PRKCA; ZMYND8; SYNE1; KRT8;
DMBX1	8	368	1.97531	0.819715	0.765295	1	1	1	DLG1; PUM1; CEP170; CUL3; THADA; CA1; RORA; ANXA1;
GSC	10	379	2.46914	0.994657	0.553388	1	1	1	ABCD3; DLG1; MED14; PRCC; VAMP3; ZMYND8; THADA; UBAP2L; YBX1; CA1;
HNF4A	68	3015	16.7901	0.84952	0.94608	1	1	1	ANKHD1; ARPP19; AUP1; BCKDHB; BCL2L1; BORA; CASP2; CCNK; CDK6; CEBPB; DAPL1; DHX29; DLG1; DLGAP4; DPH5; EHMT2; EIF4ENIF1; FUBP1; KDM3B; KIF4A; LIMS1; MRPL2; NAA40; NCAPD3; PEX14; PLCB3; POLA1; PRCC; PRKCA; PSAT1; PUM1; RB1; RGS3; SMC2; TARS2; TOMM40; ZMYND8; ARSA; KLC4; LRP1; TMBIM1; VAV2; BMI1; DGCR8; ELOVL1; GEMIN6; ICOS; IVNS1ABP; NBN; RFX1; THADA; ARHGEF15; PDPR; KRT5; ARVCF; KRT36; ALB; CTSZ…
HOXA3	10	573	2.46914	0.657903	0.942665	1	1	1	CDK6; CELF1; DLGAP4; NSA2; POLA1; PRKCA; ZCCHC6; SYNE1; DAB2; RORA;
HOXB3	11	335	2.71605	1.23771	0.278374	1	1	1	DPH5; KDM3B; NOC2L; ZCCHC6; ZFP36L1; KRT6A; IVNS1ABP; NBN; ALB; KRT14; HNMT;
HOXD8	22	811	5.4321	1.02208	0.490321	1	1	1	ANKHD1; ARPP19; CDK13; CDK6; DAPL1; DLG1; FBXW11; ORC4; PUM1; RIF1; TNIK; ZMYND8; SYNE1; ABHD4; CUL3; MFF; NBN; THADA; ALB; LGALS3; RORA; MRPS9;
ONECUT1	18	564	4.44444	1.20259	0.24342	1	1	1	ANKHD1; ARID2; BCKDHB; DLG1; ORC4; PDK3; RAC1; RIF1; RNASEH2B; DSG1; MYH2; SYNE1; FNBP4; GPHN; IVNS1ABP; DAB2; SKAP2; HMGCS1;
PAX7	6	467	1.48148	0.484661	0.986255	1	1	1	CD69; PUM1; SRSF12; THADA; AP1S2; ANXA1;
POU4F3	19	687	4.69136	1.0421	0.461089	1	1	1	ANKHD1; DAPL1; DLG1; DUSP12; FUBP1; HLA-DRB1; NOC2L; NUFIP2; ORC4; ZMYND8; SYNE1; CUL3; NBN; THADA; KRT3; ALB; KRT10; CD14; MRPS9;
PRRX2	16	597	3.95062	1.00995	0.521292	1	1	1	ANKHD1; DAPL1; FANCD2; HN1; MIER1; POLA1; PUM1; TARS2; TBC1D2B; SYNE1; THADA; ALB; SKAP2; CA2; ANXA1; MRPS9;
VAX2	14	434	3.45679	1.21571	0.265098	1	1	1	CDK13; CHAF1B; DAPL1; DHX29; DLG1; ETV6; NOC2L; PEX14; SMC2; ZCCHC6; CEP170; THADA; RORA; CD14;
VSX2	18	595	4.44444	1.13993	0.318157	1	1	1	CDK13; DAPL1; DLG1; EIF4ENIF1; FAM162A; PHF14; PRKCA; RAC1; RIF1; STK17A; GEMIN6; IVNS1ABP; RCL1; THADA; FLG2; AK4; CA2; ANXA1;
CUX1	9	350	2.22222	0.969469	0.58642	1	1	1	ANKHD1; ARID2; CYP51A1; FBXO7; RIF1; SYNE1; CEP170; MFF; SKAP2;
CACD	15	514	3.7037	1.09976	0.39107	1	1	1	DES; DLGAP4; IPO11; MIER1; RAC1; TNIK; BCL2L15; CYSTM1; RAP1GAP2; SYNE1; JUP; LGALS3; MTHFD2; RORA; ANXA1;
HOXB13	14	526	3.45679	1.00308	0.535155	1	1	1	ANKHD1; BCL2; IPO11; RGS3; TNIK; ZMYND8; DSG1; NEDD9; KRT82; STMN2; LGALS3; SELENBP1; SKAP2; GALM;
ZNF238	15	799	3.7037	0.707487	0.941688	1	1	1	CDK13; CRTC2; DLGAP4; MAN1A1; MED14; PHF14; ZMYND8; ARHGEF7; CHST11; PTPRJ; TGFB3; ALB; JUP; ACSL4; UBAP2L;
ZNF513	15	799	3.7037	0.707487	0.941688	1	1	1	CDK13; CRTC2; DLGAP4; MAN1A1; MED14; PHF14; ZMYND8; ARHGEF7; CHST11; PTPRJ; TGFB3; ALB; JUP; ACSL4; UBAP2L;
MYC	30	1086	7.40741	1.04069	0.437951	1	1	1	ANKHD1; DCAF13; DLG1; DLGAP4; GALT; IPO11; NTMT1; ORC4; PFN2; QTRT1; RAD9A; BLOC1S1; CPT1A; GAA; RCL1; RFX1; THADA; ZNRF2; AP1S2; PDPR; FLG2; UBAP2L; CTSA; PPIF; HN1L; MRTO4; HEXA; CSTB; CD320; GALNS;
MYF5	45	1856	11.1111	0.913311	0.76671	1	1	1	ABCD3; ANKHD1; CELF1; DLGAP4; DPCD; EIF4EBP1; ELP5; HN1; LARP4B; MAN2A1; MIER1; ORC4; PLCB3; RGS3; SZRD1; TBC1D2B; WDR73; ZMYND8; ADA; BLOC1S1; KRT19; TSTD1; CCDC9; CEP170; NEDD9; PLP2; RFX1; AP1S2; LRP5; ST6GALNAC2; DRP2; ARVCF; KRT36; KRT8; AK4; KRT14; PCNA; SKAP2; BRE; PPIF; CA1; MRTO4; CREG1; CELA3A; PCNP;
FOXD1	10	334	2.46914	1.12866	0.394778	1	1	1	FUBP1; RB1; RNASEH2B; SRBD1; TARS2; ZMYND8; SYNE1; ICOS; TGFB3; DAB2;
POU6F1	20	655	4.93827	1.15051	0.291268	1	1	1	ANKHD1; CCNK; CD69; DAPL1; FUBP1; IPO11; MIER1; ORC4; PDK3; PHF14; POLA1; RNASEH2B; BMI1; CEP170; CUL3; NEDD9; THADA; KRT10; CDK2; MRPS9;
ASCL2	34	1499	8.39506	0.85446	0.857696	1	1	1	C9orf78; CDK6; CELF1; CHEK1; CLK3; DES; DLG1; DPCD; EIF4ENIF1; HLA-DRB1; KIF1BP; ORC4; PDK3; PRCC; PSAT1; RPRD2; USP8; BLOC1S1; CPT1A; MYH2; SYNE1; RCL1; DRP2; ARVCF; NPM3; NOLC1; CEP85; UBAP2L; CDK2; PCNA; CA1; PPT1; SSH1; SEPT3;
BARHL1	13	509	3.20988	0.962589	0.597072	1	1	1	DAPL1; DLG1; GRSF1; KAT7; NOC2L; ORC4; PUM1; TNIK; ZMYND8; DSG1; KRT75; SKAP2; ANXA1;
ESRRA	28	917	6.91358	1.15035	0.246944	1	1	1	CDK13; COX6A1; DLGAP4; DPCD; DPH5; GRIPAP1; LIMS1; MRPS18B; NDEL1; PRMT3; PSMD5; RB1; SHOC2; TMEM70; SYNE1; TMBIM1; THADA; PDPR; KRT5; ADAMTSL4; SLC16A3; CTSA; SKAP2; CAMP; PPIF; CA1; APOBR; SMPDL3A;
GBX1	4	199	0.987654	0.758856	0.77827	1	1	1	CDK6; NOC2L; AP1S2; LRP5;
GBX2	6	302	1.48148	0.749451	0.816884	1	1	1	CDK6; DLGAP4; MIER1; NOC2L; SMC2; ZCCHC6;
LHX4	8	392	1.97531	0.769529	0.821458	1	1	1	DAPL1; DLG1; NOC2L; PHF14; ZCCHC6; ABHD4; ALB; CA2;
POU3F4	10	366	2.46914	1.02999	0.508674	1	1	1	ANKHD1; DAPL1; DLG1; HLA-DRB1; NOC2L; ORC4; ZMYND8; CEP170; NBN; ANXA1;
TCF12	32	1099	7.90123	1.09692	0.318276	1	1	1	CLK3; DAPL1; DPCD; EIF4ENIF1; MAN1A1; MED14; NOB1; PRCC; PRKCA; PRMT3; PSAT1; RGS3; TBC1D2B; BLOC1S1; MYH2; SYNE1; TMBIM1; TGFB3; VWA9; DNASE1; DRP2; KRT5; ARVCF; UHRF1; HARS2; SELENBP1; KRT1; MCM5; PPIF; CA1; SEMA4A; NAGA;
ELF2	21	780	5.18519	1.01442	0.506219	1	1	1	DLGAP4; HN1; KLF13; RGS3; SHOC2; TNIK; ZCCHC6; ARHGEF7; LRP1; SYNE1; TMBIM1; VAV2; CEP170; ELOVL1; ICOS; ARVCF; PAPSS2; TJP3; HEXB; UBASH3B; CD14;
ESR1	20	696	4.93827	1.08273	0.390308	1	1	1	CELF1; DCUN1D5; DES; DLGAP4; DPCD; MRPL24; NOC2L; NUFIP2; RGS3; SDAD1; ZMYND8; ACAD9; LRP1; SYNE1; TMBIM1; ICOS; THADA; DNASE1; SKAP2; MRTO4;
FOS	46	1754	11.358	0.987893	0.559826	1	1	1	CASP2; CCR4; CDV3; DLGAP4; EIF4ENIF1; HDAC3; HN1; LIMS1; MRPL2; PDK3; PRCC; RAC1; RGS3; ZMYND8; BLOC1S1; KLC4; NPL; SYNE1; TSTD1; ABHD4; CD226; CUL3; PLP2; PMVK; THADA; AP1S2; ARHGEF15; S100A2; FCGR2B; KRT5; KRT79; ARVCF; KRT18; KRT8; HARS2; KRT10; JUP; NOLC1; LGALS3; SKAP2; PPT1; CD14; APOBR; CELA3A; ANXA1; FTL;
FOSB	46	1754	11.358	0.987893	0.559826	1	1	1	CASP2; CCR4; CDV3; DLGAP4; EIF4ENIF1; HDAC3; HN1; LIMS1; MRPL2; PDK3; PRCC; RAC1; RGS3; ZMYND8; BLOC1S1; KLC4; NPL; SYNE1; TSTD1; ABHD4; CD226; CUL3; PLP2; PMVK; THADA; AP1S2; ARHGEF15; S100A2; FCGR2B; KRT5; KRT79; ARVCF; KRT18; KRT8; HARS2; KRT10; JUP; NOLC1; LGALS3; SKAP2; PPT1; CD14; APOBR; CELA3A; ANXA1; FTL;
JUN	46	1754	11.358	0.987893	0.559826	1	1	1	CASP2; CCR4; CDV3; DLGAP4; EIF4ENIF1; HDAC3; HN1; LIMS1; MRPL2; PDK3; PRCC; RAC1; RGS3; ZMYND8; BLOC1S1; KLC4; NPL; SYNE1; TSTD1; ABHD4; CD226; CUL3; PLP2; PMVK; THADA; AP1S2; ARHGEF15; S100A2; FCGR2B; KRT5; KRT79; ARVCF; KRT18; KRT8; HARS2; KRT10; JUP; NOLC1; LGALS3; SKAP2; PPT1; CD14; APOBR; CELA3A; ANXA1; FTL;
JUNB	46	1754	11.358	0.987893	0.559826	1	1	1	CASP2; CCR4; CDV3; DLGAP4; EIF4ENIF1; HDAC3; HN1; LIMS1; MRPL2; PDK3; PRCC; RAC1; RGS3; ZMYND8; BLOC1S1; KLC4; NPL; SYNE1; TSTD1; ABHD4; CD226; CUL3; PLP2; PMVK; THADA; AP1S2; ARHGEF15; S100A2; FCGR2B; KRT5; KRT79; ARVCF; KRT18; KRT8; HARS2; KRT10; JUP; NOLC1; LGALS3; SKAP2; PPT1; CD14; APOBR; CELA3A; ANXA1; FTL;
JUND	46	1754	11.358	0.987893	0.559826	1	1	1	CASP2; CCR4; CDV3; DLGAP4; EIF4ENIF1; HDAC3; HN1; LIMS1; MRPL2; PDK3; PRCC; RAC1; RGS3; ZMYND8; BLOC1S1; KLC4; NPL; SYNE1; TSTD1; ABHD4; CD226; CUL3; PLP2; PMVK; THADA; AP1S2; ARHGEF15; S100A2; FCGR2B; KRT5; KRT79; ARVCF; KRT18; KRT8; HARS2; KRT10; JUP; NOLC1; LGALS3; SKAP2; PPT1; CD14; APOBR; CELA3A; ANXA1; FTL;
NR6A1	20	769	4.93827	0.979952	0.571331	1	1	1	CDK6; FAM162A; FUBP1; HDAC3; MRPL2; ORC4; PUM1; RGS3; CPT1A; KLC4; SYNE1; BMI1; CUL3; TUBAL3; IL2RA; CEP85; UBAP2L; PPIF; POLA2; RORA;
RAB40B	20	806	4.93827	0.934967	0.655957	1	1	1	CDK13; CELF1; DPCD; DPH5; MRPL2; POLA1; PSMD5; RGS3; ZMYND8; KLC4; STRADA; SYNE1; RFX1; THADA; PAPSS2; PCNA; SKAP2; CA1; SSH1; MRPS9;
RARA	20	806	4.93827	0.934967	0.655957	1	1	1	CDK13; CELF1; DPCD; DPH5; MRPL2; POLA1; PSMD5; RGS3; ZMYND8; KLC4; STRADA; SYNE1; RFX1; THADA; PAPSS2; PCNA; SKAP2; CA1; SSH1; MRPS9;
SPI1	31	814	7.65432	1.4347	0.027845	1	0.83535	1	ANKHD1; ARPP19; ASAP2; BRI3BP; CDV3; COX6A1; DHX36; EIF4ENIF1; FTSJ3; HCCS; KDM3B; LIMS1; LPGAT1; MED14; POLA1; RSRC2; TBC1D2B; ZMYND8; PRTN3; SYNE1; BMI1; CSNK1G1; FCGR2B; KRT4; ACSL4; SLC16A3; CTSA; HNMT; CTSS; APOBR; PCNP;
BARX2	8	296	1.97531	1.0191	0.530071	1	1	1	DAPL1; NOC2L; PEX14; TNIK; ZCCHC6; KRT10; ANXA1; MRPS9;
DBX2	8	408	1.97531	0.739352	0.852757	1	1	1	ANKHD1; DAPL1; NOC2L; TNIK; ZMYND8; NBN; THADA; MRPS9;
EN1	13	466	3.20988	1.05141	0.467832	1	1	1	CDK13; CHAF1B; DAPL1; DLGAP4; ETV6; NOC2L; SMC2; TNIK; ABHD4; NBN; AP1S2; LRP5; ANXA1;
FOXC1	7	301	1.7284	0.877055	0.69138	1	1	1	CDK6; ORC4; RMI2; RSRC2; ZMYND8; BMI1; EZH1;
HOXA5	26	916	6.41975	1.06937	0.390789	1	1	1	CDK6; DAPL1; DLG1; DPCD; ETV6; GRSF1; NOC2L; ORC4; PDK3; PEX14; PHF14; PRKCA; PUM1; RB1; RIF1; SEC24B; TARS2; ZCCHC6; SYNE1; ABHD4; BMI1; THADA; KRT10; UBAP2L; SKAP2; CA2;
HOXA7	10	527	2.46914	0.715328	0.897518	1	1	1	ANKHD1; DAPL1; DES; EBP; EIF4ENIF1; POLA1; PUM1; ZCCHC6; BMI1; ANXA1;
HOXB6	3	123	0.740741	0.921544	0.638184	1	1	1	DLGAP4; PEX14; POLA1;
HOXB7	12	388	2.96296	1.16571	0.335841	1	1	1	DLG1; ETV6; NOC2L; PEX14; POLA1; SMC2; TNIK; BMI1; CEP170; NBN; THADA; RORA;
HOXB8	4	225	0.987654	0.67117	0.852055	1	1	1	DUSP12; MMP14; ZMYND8; AP1S2;
HOXC6	5	237	1.23457	0.796088	0.758118	1	1	1	CDK6; DAPL1; DES; ORC4; POLA1;
ISX	3	265	0.740741	0.427754	0.973531	1	1	1	MIER1; JUP; HMGCS1;
LHX8	5	223	1.23457	0.846064	0.709734	1	1	1	DLG1; MIER1; PHF14; POLA1; LRP5;
MNX1	7	311	1.7284	0.848855	0.723198	1	1	1	CDK13; ETV6; NOC2L; PEX14; SMC2; ZCCHC6; CEP170;
MSX1	4	234	0.987654	0.645357	0.872232	1	1	1	DAPL1; NOC2L; TNIK; AP1S2;
NKX1-1	4	146	0.987654	1.03431	0.54527	1	1	1	DLGAP4; NOC2L; CEP170; KRT14;
PAX6	11	557	2.71605	0.744413	0.878848	1	1	1	ANKHD1; DLG1; KIF4A; NOC2L; PEX14; SRSF12; DSG1; BMI1; CTSS; CD14; ANXA1;
PBX1	15	741	3.7037	0.762863	0.891065	1	1	1	ABCD3; BCL2; DAPL1; DLG1; DLGAP4; KAT7; ORC4; RNASEH2B; TBC1D2B; SYNE1; CD226; RCL1; AP1S2; BRE; THY1;
PKNOX1	1	95	0.246914	0.400352	0.923047	1	1	1	BCL2;
POU5F1	9	373	2.22222	0.909691	0.661909	1	1	1	LEMD2; NUFIP2; PDK3; PUM1; RGS3; ZMYND8; AK4; STMN2; SKAP2;
PRRX1	8	389	1.97531	0.775464	0.815055	1	1	1	ANKHD1; DLGAP4; NOC2L; ZCCHC6; ABHD4; DAB2; ALB; ANXA1;
REST	18	765	4.44444	0.886618	0.735549	1	1	1	ANKHD1; DLGAP4; FAM162A; KAT7; MMP14; ORC4; POLA1; PRMT3; TARS2; HS1BP3; KRT13; RAP1GAP2; CLPB; RCL1; JUP; UBAP2L; STMN2; SSH1;
SOX1	7	276	1.7284	0.956496	0.602222	1	1	1	ANKHD1; LEMD2; PUM1; RGS3; SHOC2; CEP170; AP1S2;
TGIF1	26	1034	6.41975	0.947339	0.643603	1	1	1	ARID2; CD82; CDV3; CELF1; COX6A1; DCAF13; DES; DLG1; DPCD; POLA1; BLOC1S1; STRADA; SYNE1; BMI1; CUL3; GPHN; NBN; RCL1; THADA; ZNRF2; LRP5; MCM3; HEXB; KRT1; CA1; TGM3;
CRX	10	349	2.46914	1.08015	0.448519	1	1	1	DLG1; FANCD2; PDK3; PEX14; ZMYND8; BLOC1S1; BMI1; KRT5; MCM3; KRT14;
ESR2	13	464	3.20988	1.05594	0.46161	1	1	1	CELF1; DPCD; NTMT1; NUFIP2; RGS3; ZMYND8; KRT13; SYNE1; TSTD1; THADA; CEP128; PPT1; SEPT3;
GLI1	6	148	1.48148	1.52923	0.200922	1	1	1	DLGAP4; PUM1; KRT19; CEP170; KRT79; ACSL4;
HENMT1	26	1144	6.41975	0.85625	0.823701	1	1	1	CDC42SE2; CDK13; CEND1; CLK3; DLGAP4; DPCD; EHMT2; GRIPAP1; KLF13; MAN1A1; MIER1; PEX14; RGS3; RIF1; TUBGCP4; LRP1; TMBIM1; DGCR8; RCL1; KRT5; JUP; UBAP2L; CDK2; CA2; SEMA4A; SSH1;
INSM1	7	487	1.7284	0.542088	0.976153	1	1	1	BCL2L1; NTMT1; PLCB3; PRCC; SZRD1; ADA; KRT13;
NHLH1	26	1144	6.41975	0.85625	0.823701	1	1	1	CDC42SE2; CDK13; CEND1; CLK3; DLGAP4; DPCD; EHMT2; GRIPAP1; KLF13; MAN1A1; MIER1; PEX14; RGS3; RIF1; TUBGCP4; LRP1; TMBIM1; DGCR8; RCL1; KRT5; JUP; UBAP2L; CDK2; CA2; SEMA4A; SSH1;
NR1H4	1	62	0.246914	0.613408	0.812106	1	1	1	ANKHD1;
ZEB1	3	401	0.740741	0.282684	0.998665	1	1	1	EIF4ENIF1; CEP170; AP1S2;
ZFP161	31	1137	7.65432	1.02713	0.466054	1	1	1	ANAPC4; BORA; CCNK; CDV3; CHEK1; DDX18; DLGAP4; KLF13; LARP4B; MAN1A1; NCAPD3; PAIP2; PDK3; PFN2; PRKCA; TNIK; TXNL4A; GAA; TMBIM1; RFX1; DSN1; LRP5; ACSL4; ASF1B; PAPSS2; CTSC; PCNA; POLA2; YBX1; MTHFD2; SSH1;
BACH2	13	628	3.20988	0.78019	0.856636	1	1	1	LAG3; MRPL2; PRCC; KLC4; LRP1; VAV2; GEMIN6; KRT5; ARVCF; KRT18; MCM5; CD14; SEPT3;
EBF1	5	205	1.23457	0.920349	0.638174	1	1	1	DLGAP4; MRPL2; KLC4; JUP; AK4;
HOXA13	10	309	2.46914	1.21998	0.306601	1	1	1	DES; LPGAT1; PFN2; PHF14; RPRD2; ZMYND8; KRT1; SKAP2; GALM; MRPS9;
MSX2	9	344	2.22222	0.986378	0.565505	1	1	1	CDK6; DAPL1; FUBP1; NOC2L; SMC2; TARS2; TOMM40; ABHD4; HNMT;
NOBOX	17	621	4.19753	1.03156	0.484027	1	1	1	CHAF1B; DAPL1; DLG1; DLGAP4; EIF4ENIF1; KAT7; NOC2L; PFN2; RB1; TOMM40; VAMP3; ZMYND8; DSG1; MCM3; KIAA0196; CD14; ANXA1;
TFAP4	35	1280	8.64198	1.03007	0.453473	1	1	1	ABCC1; BCL2L1; CD82; CDK13; CDK6; DES; DLG1; DPCD; EIF4EBP1; EIF4ENIF1; HN1; KLF13; MIER1; POLA1; RPRD2; USP8; ZMYND8; BLOC1S1; KRT19; LRP1; RAP1GAP2; CLPB; NEDD9; RCL1; DRP2; KRT5; UHRF1; CEP85; UBAP2L; SELENBP1; SKAP2; PPIF; CA1; SEPT3; TGM3;
ATF3	22	800	5.4321	1.03613	0.464039	1	1	1	DES; DHX36; DLG1; HN1; KLF13; LIN7C; MAN2A1; MMAB; MORF4L1; SLC35E1; TTC1; ZFP36L1; ARHGEF7; CYSTM1; RFX1; TGFB3; THADA; NOLC1; AK4; CA2; BRE; PCNP;
TAL1	30	1113	7.40741	1.01545	0.493599	1	1	1	BCL2L1; CDK6; DCAF13; DLG1; DLGAP4; EIF4ENIF1; LEMD2; NOC2L; PDK3; PHF14; PUM1; RAC1; RGS3; STX5; TBC1D2B; USP8; ZMYND8; BCL2L15; BLOC1S1; CEP170; CHST11; DGCR8; IVNS1ABP; ZNF740; DRP2; ARVCF; UHRF1; ACSL4; AK4; ASAH1;
HOXA9	24	729	5.92593	1.24036	0.163255	1	1	1	ARID2; BCKDHB; CDK6; CELF1; DES; DLG1; ETV6; FAM98A; FANCD2; GBP6; MED14; RGS3; SRBD1; TNIK; WDHD1; BMI1; CEP170; AP1S2; KRT36; KRT10; STMN2; YBX1; IL1B; ANXA1;
NFE2	7	518	1.7284	0.509647	0.985739	1	1	1	HDAC3; HN1; ABHD4; PLP2; S100A2; CELA3A; FTL;
RUNX1	1	37	0.246914	1.02776	0.630979	1	1	1	ZMYND8;
LMO2	15	610	3.7037	0.926688	0.657314	1	1	1	CEBPB; DLG1; DPCD; MAN1A1; MAN2A1; NAA40; PRCC; PTPRJ; TGFB3; AP1S2; DRP2; KRT36; TJP3; PCNA; PCNP;
RUNX2	7	315	1.7284	0.838076	0.735282	1	1	1	CRTC2; ETV6; TBC1D2B; SYNE1; RCL1; LRP5; SLC2A3;
GATA1	15	728	3.7037	0.776485	0.875848	1	1	1	DAPL1; ETV6; KDM3B; PDK3; PFN2; PUM1; ZMYND8; NPL; TMBIM1; THADA; AP1S2; KRT3; NPM3; STMN2; HNMT;
FOXD3	12	361	2.96296	1.25289	0.2532	1	1	1	ABCD3; DLG1; DPCD; ORC4; POLA1; PUM1; RIF1; CEP170; ITIH2; THADA; P2RY12; RORA;
ISL2	15	515	3.7037	1.09763	0.393958	1	1	1	DAPL1; DPH5; FAM98A; NOC2L; ORC4; PHF14; RIF1; SYNE1; BMI1; MFF; THADA; KRT3; UBAP2L; SKAP2; ANXA1;
ZNF143	22	618	5.4321	1.34126	0.100261	1	1	1	AUP1; DHX29; DLGAP4; DUS3L; EHMT2; GTF2H4; HCCS; MRPL24; MRPL54; MRPS18B; NDC1; NOP14; RGS3; TBC1D2B; TOMM40; TTC1; CEP170; AP1S2; KRT8; MRTO4; THY1; ACAD8;
CDX2	6	253	1.48148	0.894595	0.666959	1	1	1	PUM1; RGS3; SYNE1; MFF; KRT36; SKAP2;
FOXK1	2	121	0.493827	0.625554	0.835416	1	1	1	TGFB3; MRPS9;
FOXO1	7	192	1.7284	1.37494	0.249566	1	1	1	CDK6; CRTC2; LEMD2; RGS3; TXNIP; TGFB3; MRPS9;
GFI1	9	552	2.22222	0.614706	0.959997	1	1	1	ANKHD1; ASAP2; DLG1; GTF2H4; IPO11; RPRD2; UHRF1; CA1; IL1B;
HMX1	9	240	2.22222	1.41379	0.189442	1	1	1	DLG1; DUSP12; ZMYND8; CUL3; MFF; THADA; AP1S2; DAB2; SKAP2;
HOXB9	15	537	3.7037	1.05266	0.457743	1	1	1	DLG1; FAM98A; FANCD2; FUBP1; RGS3; USP8; ZMYND8; MFF; THADA; KRT36; RNASE6; STMN2; SKAP2; IL1B; CD14;
PAX4	6	175	1.48148	1.29331	0.321073	1	1	1	CDK13; CDK2AP1; ZCCHC6; IVNS1ABP; AP1S2; LRP5;
PDX1	10	372	2.46914	1.01337	0.529487	1	1	1	ARID2; ARPP19; IPO11; PDK3; ZMYND8; CYSTM1; DSG1; SYNE1; PAPSS2; CTSA;
EOMES	4	291	0.987654	0.518951	0.95271	1	1	1	DLGAP4; MRPL54; RGS3; RIF1;
POU3F3	1	59	0.246914	0.644593	0.796241	1	1	1	FUBP1;
ATF6	4	195	0.987654	0.774421	0.764669	1	1	1	HCCS; PUM1; SLC35E1; STX5;
STRA13	21	574	5.18519	1.37847	0.0864711	1	1	1	ANKHD1; CELF1; DLG1; GALT; NAA40; NTMT1; PRMT3; QTRT1; RAD9A; TIMM22; BLOC1S1; GAA; PMVK; IFI30; UBAP2L; MCM2; CTSA; PPIF; HEXA; CSTB; GALNS;
ZIC1	17	548	4.19753	1.16898	0.289084	1	1	1	CDK6; DLGAP4; ETV6; FTSJ3; GRIPAP1; HDAC3; KIF1BP; MORF4L1; LGMN; LRP1; CEP170; TGFB3; KRT3; JUP; HEXB; BRE; ANXA1;
DBX1	6	239	1.48148	0.946996	0.612493	1	1	1	DAPL1; ORC4; RSRC2; ZMYND8; THADA; SKAP2;
FOXJ2	8	299	1.97531	1.00887	0.541574	1	1	1	ABCD3; ANKHD1; DLGAP4; ORC4; SRSF12; STX5; THADA; SKAP2;
HOXD10	2	48	0.493827	1.57672	0.365566	1	1	1	KRT36; SKAP2;
FOXJ1	2	31	0.493827	2.44109	0.198572	1	1	1	CRTC2; TGFB3;
E4F1	4	158	0.987654	0.955762	0.607843	1	1	1	AURKB; RANBP6; STX5; DSN1;
ITGAL	4	178	0.987654	0.848379	0.699625	1	1	1	CEBPB; DLGAP4; ARHGEF15; YBX1;
ESX1	5	266	1.23457	0.709299	0.83868	1	1	1	NOC2L; SRSF12; TNIK; THADA; ANXA1;
TLX2	3	60	0.740741	1.889	0.213203	1	1	1	FUBP1; NUFIP2; ZMYND8;
DLX5	9	220	2.22222	1.54231	0.132432	1	1	1	ATM; CDK6; ETV6; PEX14; PHF14; PRKCA; SMC2; ZCCHC6; RCL1;
ATF4	11	315	2.71605	1.31629	0.217523	1	1	1	DHX36; HN1; KIF4A; RB1; SOAT1; CYSTM1; ABHD4; RFX1; THADA; NOLC1; BRE;
ELF3	14	437	3.45679	1.20736	0.273304	1	1	1	ARID2; CRTC2; DLG1; KDM3B; NUFIP2; RIF1; WDHD1; ZCCHC6; ZMYND8; THADA; RNASE6; HNMT; BRE; CTSS;
SPDEF	5	189	1.23457	0.998258	0.566217	1	1	1	MIER1; TMEM41B; WDHD1; LRP1; DRP2;
PAX5	6	149	1.48148	1.51897	0.205059	1	1	1	HDAC3; KDM3B; RGS3; BMI1; RCL1; S100A2;
NKX3-1	3	61	0.740741	1.85804	0.220169	1	1	1	CDK6; RIF1; KRT5;
WT1	3	17	0.740741	6.66426	0.00957875	1	0.670513	1	CDK12; CDK6; ZMYND8;
RBPJ	8	235	1.97531	1.28362	0.287273	1	1	1	CDK6; CEND1; EIF4ENIF1; MED14; HS1BP3; LGMN; MFF; KRT8;
PATZ1	2	38	0.493827	1.99154	0.26756	1	1	1	CDK12; ORC4;
MAFK	2	128	0.493827	0.591346	0.857781	1	1	1	PDK3; RGS3;
ALX1	1	56	0.246914	0.679119	0.779041	1	1	1	DPCD;
PLAGL1	1	7	0.246914	5.42617	0.171729	1	1	1	PLCB3;

## Sheet: Clinical phenotype
Analysis: Clinical phenotype
Dataset name: LysateBanLecp005
Number of genes in the dataset: 444
Number of genes in the dataset (which are available in Clinical phenotype database) :61
Number of genes in background: 1820
Is analysis quantitative: No
						Corrected p-values
Clinical phenotype	No. of genes in the dataset	No. of genes in the background dataset	Percentage of genes	Fold enrichment	P-value (Hypergeometric test)	Bonferroni method	BH method	Q-value (Storey-Tibshirani method)	genes mapped (from input data set)
Hyperkeratosis of the palms and soles	4	5	6.55738	23.877	5.58256e-06	0.123397	0.123397	0.802846	KRT5; KRT10; KRT14; KRT1;
Abdomen	22	621	36.0656	1.05729	0.420178	1	1	1	BCKDHB; DES; GALT; HCCS; HLA-DRB1; MMAB; NDUFAF3; ADA; ARSA; CPT1A; GAA; DHCR7; ICOS; NBN; KRT18; KRT8; FUCA1; NPC2; KIAA0196; ASAH1; FTL; GALNS;
Abnormal brain myelination	1	1	1.63934	29.8313	0.0335165	1	1	1	GAA;
Abnormal cholesterol homeostasis	1	2	1.63934	14.9899	0.0659274	1	1	1	NPC2;
Abnormal sleep pattern	1	1	1.63934	29.8313	0.0335165	1	1	1	DHCR7;
Abnormal tonofibrils with formation of concentric unbroken shells of tonofilaments surrounding the nucleus on EM	1	1	1.63934	29.8313	0.0335165	1	1	1	KRT1;
Absence of premature birth, low birthweight, and exposure to oxygen	1	2	1.63934	14.9899	0.0659274	1	1	1	LRP5;
Absence of septum pellucidum	1	1	1.63934	29.8313	0.0335165	1	1	1	HCCS;
Absence seizures (stage 2 and 3)	1	1	1.63934	29.8313	0.0335165	1	1	1	CSTB;
Absent anterior eye chamber	1	1	1.63934	29.8313	0.0335165	1	1	1	LRP5;
Absent B cells	1	4	1.63934	7.51363	0.127575	1	1	1	ADA;
Absent deep tendon reflexes	1	2	1.63934	14.9899	0.0659274	1	1	1	GAA;
Absent fingerprints	1	1	1.63934	29.8313	0.0335165	1	1	1	KRT14;
Absent/hypoplastic coccyx	1	1	1.63934	29.8313	0.0335165	1	1	1	FUCA1;
Absent/hypoplastic paranasal sinuses	1	1	1.63934	29.8313	0.0335165	1	1	1	FUCA1;
Absent IgG2 subclass	1	1	1.63934	29.8313	0.0335165	1	1	1	ADA;
Absent or reduced CD3+ cells	1	1	1.63934	29.8313	0.0335165	1	1	1	ADA;
Absent or small dysplastic thymus	1	1	1.63934	29.8313	0.0335165	1	1	1	ADA;
Absent ribs	1	4	1.63934	7.51363	0.127575	1	1	1	KIAA0196;
Absent specific antibody response	1	1	1.63934	29.8313	0.0335165	1	1	1	ADA;
Absent T cells	1	1	1.63934	29.8313	0.0335165	1	1	1	ADA;
Acantholytic changes (in some patients)	1	1	1.63934	29.8313	0.0335165	1	1	1	KRT5;
Acanthosis	1	5	1.63934	6.0139	0.15688	1	1	1	DSG1;
Acanthotic epidermis	2	2	3.27869	29.8313	0.00110555	1	0.452537	1	KRT10; KRT1;
Acroosteolysis	1	6	1.63934	5.01325	0.185216	1	1	1	CTSC;
Action myoclonus (triggered by voluntary movements)	1	1	1.63934	29.8313	0.0335165	1	1	1	CSTB;
Activated mononuclear phagocytes	1	1	1.63934	29.8313	0.0335165	1	1	1	HLA-DRB1;
Activated T-helper cells	1	1	1.63934	29.8313	0.0335165	1	1	1	HLA-DRB1;
Acute fatty liver in pregnancy (fetus with carnitine palmitoyltransferase I (CPT1) deficiency)	1	1	1.63934	29.8313	0.0335165	1	1	1	CPT1A;
Acute intraocular hypertension (rare)	1	1	1.63934	29.8313	0.0335165	1	1	1	ADAMTSL4;
Acute necrotizing encephalopathy	1	18	1.63934	1.67294	0.460209	1	1	1	NDUFAF3;
Adermatoglyphia	1	2	1.63934	14.9899	0.0659274	1	1	1	KRT14;
Adrenal hypoplasia	1	5	1.63934	6.0139	0.15688	1	1	1	KIAA0196;
Adult height 82 to 115 cm	1	1	1.63934	29.8313	0.0335165	1	1	1	GALNS;
Adult onset (18 to 60 years)	1	1	1.63934	29.8313	0.0335165	1	1	1	KIAA0196;
Adult onset after puberty	1	1	1.63934	29.8313	0.0335165	1	1	1	ARSA;
Adult onset form usually presents with psychiatric manifestations	1	1	1.63934	29.8313	0.0335165	1	1	1	ARSA;
Affected children are unable to sit without support	1	1	1.63934	29.8313	0.0335165	1	1	1	SMN1;
Affected muscles show atrophy	1	1	1.63934	29.8313	0.0335165	1	1	1	DES;
Age at diagnosis of cataract may range up to 40 years	1	1	1.63934	29.8313	0.0335165	1	1	1	FTL;
Agenesis of corpus callosum	1	16	1.63934	1.88193	0.421754	1	1	1	HCCS;
Aggregated tonofilaments at cell surface	1	2	1.63934	14.9899	0.0659274	1	1	1	KRT1;
Aggressive behavior	1	20	1.63934	1.50573	0.496145	1	1	1	DHCR7;
Airways	6	66	9.83607	2.71605	0.0209115	1	1	1	ATM; EBP; ADA; ICOS; NBN; HEXA;
All cases occur in a Jewish religious isolate originally from Cochin, India	1	1	1.63934	29.8313	0.0335165	1	1	1	CTSC;
Allelic disorder to EBS Dowling-Meara (	1	1	1.63934	29.8313	0.0335165	1	1	1	KRT5;
Allelic disorder to osteoporosis-pseudoglioma syndrome (OPPG,	1	1	1.63934	29.8313	0.0335165	1	1	1	LRP5;
Allelic disorder to spinal muscular atrophy type I (	1	1	1.63934	29.8313	0.0335165	1	1	1	SMN1;
Allelic to osteoporosis-pseudoglioma syndrome (	1	1	1.63934	29.8313	0.0335165	1	1	1	LRP5;
Allelic to Papillon-Lefevre syndrome (	1	1	1.63934	29.8313	0.0335165	1	1	1	CTSC;
Allelic to type I osteopetrosis (	1	1	1.63934	29.8313	0.0335165	1	1	1	LRP5;
Alpha-L-fucosidase deficiency	1	1	1.63934	29.8313	0.0335165	1	1	1	FUCA1;
Alternate periods of remission and exacerbation	1	1	1.63934	29.8313	0.0335165	1	1	1	KRT4;
Alveolar bone destruction	1	1	1.63934	29.8313	0.0335165	1	1	1	CTSC;
Ambiguous genitalia	2	11	3.27869	5.44605	0.050035	1	1	1	DHCR24; DHCR7;
Amniotic Fluid	1	68	1.63934	0.443018	0.905836	1	1	1	EBP;
Anal atresia	2	10	3.27869	5.99011	0.0418252	1	1	1	NBN; KIAA0196;
Anal stenosis	1	11	1.63934	2.73657	0.313434	1	1	1	NBN;
Anarthria	1	3	1.63934	10.0099	0.0972687	1	1	1	FTL;
Anemia	3	43	4.91803	2.08771	0.172379	1	1	1	FANCD2; MMAB; CA2;
Anemia, mild	1	1	1.63934	29.8313	0.0335165	1	1	1	ELANE;
Anemic pallor	1	3	1.63934	10.0099	0.0972687	1	1	1	FANCD2;
Angiokeratoma	1	4	1.63934	7.51363	0.127575	1	1	1	FUCA1;
Anhidrosis	1	7	1.63934	4.2981	0.212615	1	1	1	FUCA1;
Ankle hyporeflexia	1	1	1.63934	29.8313	0.0335165	1	1	1	PDK3;
Anorexia	1	3	1.63934	10.0099	0.0972687	1	1	1	HLA-DRB1;
Anterior beaking of thoracic and lumbar vertebrae	1	1	1.63934	29.8313	0.0335165	1	1	1	FUCA1;
Anteriorly placed anus	1	7	1.63934	4.2981	0.212615	1	1	1	HCCS;
Anteverted nares	2	36	3.27869	1.66512	0.341637	1	1	1	DHCR24; DHCR7;
Anti dsDNA antibody	2	6	3.27869	9.97687	0.0151987	1	1	1	DNASE1; FCGR2B;
Antiphospholipid antibody	2	6	3.27869	9.97687	0.0151987	1	1	1	DNASE1; FCGR2B;
Aortic stenosis	1	9	1.63934	3.34402	0.264723	1	1	1	KIAA0196;
Apathy	1	11	1.63934	2.73657	0.313434	1	1	1	HEXA;
Appear normal at birth	1	2	1.63934	14.9899	0.0659274	1	1	1	GALNS;
Approximately 40% of cases are inherited or new germline mutations	1	1	1.63934	29.8313	0.0335165	1	1	1	RB1;
Approximately 45% of SMA1 patients also are missing both homologs of neuronal apoptosis inhibitory protein (NAIP,	1	1	1.63934	29.8313	0.0335165	1	1	1	SMN1;
Approximately 60% of cases are due to somatic mutations and are unilateral	1	1	1.63934	29.8313	0.0335165	1	1	1	RB1;
Arachnodactyly	1	16	1.63934	1.88193	0.421754	1	1	1	CTSC;
Areflexia	2	38	3.27869	1.57751	0.366368	1	1	1	SMN1; ASAH1;
Areflexia in lower limbs	1	2	1.63934	14.9899	0.0659274	1	1	1	SMN1;
Areflexia of the lower limbs	1	4	1.63934	7.51363	0.127575	1	1	1	SMN1;
Arrhythmias	1	7	1.63934	4.2981	0.212615	1	1	1	DES;
Arrhythmogenic right ventricular dysplasia	1	1	1.63934	29.8313	0.0335165	1	1	1	JUP;
Arthritis	3	14	4.91803	6.40916	0.0100207	1	1	1	DNASE1; FCGR2B; ASAH1;
Arthrogryposis	1	5	1.63934	6.0139	0.15688	1	1	1	DHCR24;
Aspiration	1	4	1.63934	7.51363	0.127575	1	1	1	HEXA;
Associated inflammatory bowel disease	1	1	1.63934	29.8313	0.0335165	1	1	1	HLA-DRB1;
Association between HLA class II alleles and presence of autoantibodies	2	6	3.27869	9.97687	0.0151987	1	1	1	DNASE1; FCGR2B;
Association with the HLA-DRB1*1501-DQB1*0602 haplotype has been repeatedly demonstrated in high-risk (northern European) populations.	1	3	1.63934	10.0099	0.0972687	1	1	1	HLA-DRB1;
Asthma	2	31	3.27869	1.9336	0.278811	1	1	1	ADA; HNMT;
ASTHMA, SUSCEPTIBILITY TO	1	13	1.63934	2.31588	0.358968	1	1	1	HNMT;
A subset of patients are responsive to vitamin B12 therapy	1	1	1.63934	29.8313	0.0335165	1	1	1	MMAB;
Asymmetric limb shortening	1	1	1.63934	29.8313	0.0335165	1	1	1	EBP;
Asymmetric, linear skin defects (anterior face and neck)	1	1	1.63934	29.8313	0.0335165	1	1	1	HCCS;
Ataxia	5	130	8.19672	1.14957	0.444062	1	1	1	BCKDHB; NDUFAF3; ARSA; PPT1; CSTB;
Ataxia becomes evident at the end of the first year of life	1	1	1.63934	29.8313	0.0335165	1	1	1	ATM;
Atrial septal defect	4	47	6.55738	2.54464	0.0696156	1	1	1	HCCS; SMN1; DHCR7; KIAA0196;
Atrophic scarring (less common)	2	2	3.27869	29.8313	0.00110555	1	0.452537	1	KRT5; KRT14;
Atrophic scarring (rare)	2	3	3.27869	19.9206	0.00324488	1	0.982533	1	KRT5; KRT14;
Atrophy of alveolar ridges	1	1	1.63934	29.8313	0.0335165	1	1	1	CTSC;
Atrophy of shins	1	1	1.63934	29.8313	0.0335165	1	1	1	KIAA0196;
Autofluorescent lipopigment in neurons	1	7	1.63934	4.2981	0.212615	1	1	1	PPT1;
Autoimmune hemolytic anemia	2	5	3.27869	11.9683	0.0103549	1	1	1	ADA; NBN;
Autoimmune neutropenia (less common)	1	1	1.63934	29.8313	0.0335165	1	1	1	ICOS;
Autonomic features may occur	1	1	1.63934	29.8313	0.0335165	1	1	1	FTL;
Autosomal dominant (11p)	1	5	1.63934	6.0139	0.15688	1	1	1	RB1;
Autosomal dominant	21	747	34.4262	0.83902	0.885951	1	1	1	ATM; DES; ETV6; RB1; DSG1; TGFB3; DNASE1; LRP5; FCGR2B; KRT5; KRT3; ALB; KRT4; KRT10; F13A1; ELANE; KRT14; KRT1; KIAA0196; IL1B; FTL;
Autosomal dominant and autosomal recessive forms	1	1	1.63934	29.8313	0.0335165	1	1	1	DES;
Autosomal dominant form	1	37	1.63934	0.814095	0.720355	1	1	1	CD82;
Autosomal dominantly acting oncogene plus loss of suppressor gene(s)	1	25	1.63934	1.2047	0.57601	1	1	1	PTPRJ;
Autosomal dominant vs. multifactorial	1	14	1.63934	2.15058	0.380608	1	1	1	HNMT;
Autosomal locus and allelic heterogeneity	1	1	1.63934	29.8313	0.0335165	1	1	1	IL2RA;
Autosomal recessive	33	924	54.0984	1.06572	0.345387	1	1	1	ATM; BCKDHB; DES; DHCR24; FBXO7; GALT; MMAB; NDUFAF3; RB1; SMN1; ADA; ARSA; CPT1A; GAA; DHCR7; ICOS; NBN; LRP5; KRT5; ADAMTSL4; JUP; FUCA1; KRT14; NPC2; CTSA; CTSC; CA2; KIAA0196; ASAH1; PPT1; HEXA; CSTB; GALNS;
Autosomal recessive cases, probably heterogeneous	2	2	3.27869	29.8313	0.00110555	1	0.452537	1	KRT18; KRT8;
Autosomal recessive with at least two loci and multiple alleles	1	2	1.63934	14.9899	0.0659274	1	1	1	FANCD2;
Autosomal recessive with multiple alleles and compounds	1	1	1.63934	29.8313	0.0335165	1	1	1	HEXB;
Average age at onset 38 years	1	4	1.63934	7.51363	0.127575	1	1	1	IL1B;
Axonal sensorimotor polyneuropathy	1	1	1.63934	29.8313	0.0335165	1	1	1	PDK3;
Ballooned neurons	1	2	1.63934	14.9899	0.0659274	1	1	1	HEXA;
Barrel chest	1	3	1.63934	10.0099	0.0972687	1	1	1	LRP5;
Basal cell layer contains clumped keratin filaments	1	1	1.63934	29.8313	0.0335165	1	1	1	KRT5;
Basal ganglion calcification	1	2	1.63934	14.9899	0.0659274	1	1	1	CA2;
B-cell lymphoma	1	1	1.63934	29.8313	0.0335165	1	1	1	ADA;
Behavioral disturbances	1	2	1.63934	14.9899	0.0659274	1	1	1	ARSA;
Behavioral problems	1	9	1.63934	3.34402	0.264723	1	1	1	NPC2;
Behavioral Psychiatric Manifestations	6	200	9.83607	0.896387	0.677547	1	1	1	ARSA; DHCR7; NPC2; PPT1; HEXA; FTL;
Bifid scrotum	1	10	1.63934	3.00996	0.289489	1	1	1	DHCR7;
Bilateral club feet	1	2	1.63934	14.9899	0.0659274	1	1	1	EBP;
Bilateral hilar adenopathy	1	1	1.63934	29.8313	0.0335165	1	1	1	HLA-DRB1;
Biliary Tract	1	30	1.63934	1.00399	0.64339	1	1	1	ARSA;
Biopsy shows degenerative changes consistent with myopathy	1	1	1.63934	29.8313	0.0335165	1	1	1	DES;
Birth weight	1	2	1.63934	14.9899	0.0659274	1	1	1	DHCR7;
Bitemporal narrowing	1	8	1.63934	3.7615	0.239108	1	1	1	DHCR7;
Bladder	3	90	4.91803	0.997582	0.590014	1	1	1	HLA-DRB1; ARSA; KIAA0196;
BLADDER CANCER	1	5	1.63934	6.0139	0.15688	1	1	1	RB1;
Blepharospasm	1	4	1.63934	7.51363	0.127575	1	1	1	FTL;
Blindness	3	41	4.91803	2.18952	0.155871	1	1	1	NDUFAF3; LRP5; HEXA;
Blindness by age 2	1	1	1.63934	29.8313	0.0335165	1	1	1	PPT1;
Blindness (onset in infancy)	1	1	1.63934	29.8313	0.0335165	1	1	1	LRP5;
Blistering at acral sites	1	1	1.63934	29.8313	0.0335165	1	1	1	KRT5;
Blistering becomes confined to the palms and soles with age	2	2	3.27869	29.8313	0.00110555	1	0.452537	1	KRT5; KRT14;
Blistering, generalized, recurrent (occurs after mild physical trauma)	2	2	3.27869	29.8313	0.00110555	1	0.452537	1	KRT5; KRT14;
Blistering, generalized, recurrent, severe (occurs after mild physical trauma)	2	2	3.27869	29.8313	0.00110555	1	0.452537	1	KRT5; KRT14;
Blistering may be generalized or localized	2	2	3.27869	29.8313	0.00110555	1	0.452537	1	KRT5; KRT14;
Blistering occurs in clusters ('herpetiform', 'arcuate')	2	2	3.27869	29.8313	0.00110555	1	0.452537	1	KRT5; KRT14;
Blistering of hands, elbows, feet, knees	2	2	3.27869	29.8313	0.00110555	1	0.452537	1	KRT5; KRT14;
Blistering, recurrent	2	4	3.27869	14.9529	0.00634969	1	1	1	KRT5; KRT14;
Blistering, recurrent, of the palms and soles	2	3	3.27869	19.9206	0.00324488	1	0.982533	1	KRT5; KRT14;
Blistering tends to improve with age	2	2	3.27869	29.8313	0.00110555	1	0.452537	1	KRT5; KRT14;
Blonde hair	1	1	1.63934	29.8313	0.0335165	1	1	1	DHCR7;
Blurred vision	1	3	1.63934	10.0099	0.0972687	1	1	1	HLA-DRB1;
Bone cysts	1	1	1.63934	29.8313	0.0335165	1	1	1	HLA-DRB1;
Bone destruction and mineralized soft tissue mass	1	3	1.63934	10.0099	0.0972687	1	1	1	RB1;
Bone marrow involvement may cause pancytopenia	1	1	1.63934	29.8313	0.0335165	1	1	1	HLA-DRB1;
Brachycephaly	1	37	1.63934	0.814095	0.720355	1	1	1	KIAA0196;
Bradykinesia	2	24	3.27869	2.49733	0.190973	1	1	1	FBXO7; FTL;
Brain edema	1	19	1.63934	1.58494	0.478482	1	1	1	NDUFAF3;
Brain MRI shows diffusion abnormalities	1	3	1.63934	10.0099	0.0972687	1	1	1	BCKDHB;
Brainstem lesions, hyperintense on T2-weighted imaging	1	18	1.63934	1.67294	0.460209	1	1	1	NDUFAF3;
Brain tissue shows abnormal spherical aggregates of iron and ferritin in the basal ganglia, forebrain, and cerebellum	1	1	1.63934	29.8313	0.0335165	1	1	1	FTL;
Brain tissue shows cavitation of the basal ganglia	1	1	1.63934	29.8313	0.0335165	1	1	1	FTL;
Branched chain ketoaciduria (alpha-keto isocaproate, alpha-keto-beta methylisovalerate, alpha-keto isovalerate)	1	3	1.63934	10.0099	0.0972687	1	1	1	BCKDHB;
BREAST CANCER	1	23	1.63934	1.30942	0.545681	1	1	1	ATM;
Breast cancer, lobular	1	4	1.63934	7.51363	0.127575	1	1	1	IL1B;
Breast carcinoma	1	23	1.63934	1.30942	0.545681	1	1	1	ATM;
Breech presentation	1	7	1.63934	4.2981	0.212615	1	1	1	DHCR7;
Brittle nails	1	7	1.63934	4.2981	0.212615	1	1	1	KRT14;
Broad alveolar margins	1	1	1.63934	29.8313	0.0335165	1	1	1	DHCR7;
Broad chest	1	3	1.63934	10.0099	0.0972687	1	1	1	FUCA1;
Broad, flat nasal bridge	1	2	1.63934	14.9899	0.0659274	1	1	1	DHCR7;
Broad mouth	1	4	1.63934	7.51363	0.127575	1	1	1	GALNS;
Broad nose	1	9	1.63934	3.34402	0.264723	1	1	1	FUCA1;
Bronchiectasis	3	11	4.91803	8.15553	0.00488083	1	1	1	ATM; ICOS; NBN;
Bronchitis	2	6	3.27869	9.97687	0.0151987	1	1	1	ATM; NBN;
Bronchitis, recurrent	1	2	1.63934	14.9899	0.0659274	1	1	1	ICOS;
Bulbar palsies	1	2	1.63934	14.9899	0.0659274	1	1	1	ARSA;
Bulbar weakness	1	6	1.63934	5.01325	0.185216	1	1	1	DES;
Cafe-au-lait spots	1	13	1.63934	2.31588	0.358968	1	1	1	ATM;
Cafe au lait spots	1	4	1.63934	7.51363	0.127575	1	1	1	NBN;
Calcific deposits of ischium and pubis	1	1	1.63934	29.8313	0.0335165	1	1	1	EBP;
Can be caused by mutations in nuclear-encoded or mitochondrial-encoded genes	1	18	1.63934	1.67294	0.460209	1	1	1	NDUFAF3;
Cardiac	3	55	4.91803	1.63229	0.279452	1	1	1	FANCD2; HEXB; CTSA;
Cardiac conduction defects	1	5	1.63934	6.0139	0.15688	1	1	1	HCCS;
Cardiac rhythm disturbances	1	1	1.63934	29.8313	0.0335165	1	1	1	CPT1A;
Cardiomegaly	5	21	8.19672	7.11352	0.000482655	1	0.452537	1	CPT1A; GAA; JUP; FUCA1; HEXB;
Cardiomyopathy, right ventricular	1	2	1.63934	14.9899	0.0659274	1	1	1	TGFB3;
Cardiovascular	17	446	27.8689	1.13771	0.312722	1	1	1	DES; DHCR24; HCCS; NDUFAF3; SMN1; CPT1A; GAA; DHCR7; TGFB3; DNASE1; LRP5; FCGR2B; JUP; F13A1; FUCA1; KIAA0196; GALNS;
Carious teeth	1	2	1.63934	14.9899	0.0659274	1	1	1	KRT14;
CARNITINE PALMITOYLTRANSFERASE I DEFICIENCY	1	1	1.63934	29.8313	0.0335165	1	1	1	CPT1A;
Carnitine palmitoyltransferase I deficiency (fibroblast, liver, leukocytes)	1	1	1.63934	29.8313	0.0335165	1	1	1	CPT1A;
Cataplexy	1	2	1.63934	14.9899	0.0659274	1	1	1	NPC2;
Cataract	3	36	4.91803	2.49354	0.117139	1	1	1	GALT; LRP5; ADAMTSL4;
Cataracts	3	49	4.91803	1.83212	0.224557	1	1	1	EBP; HCCS; DHCR7;
Cataracts may be subclinical in some patients	1	1	1.63934	29.8313	0.0335165	1	1	1	FTL;
Cavitating leukoencephalopathy	1	23	1.63934	1.30942	0.545681	1	1	1	NDUFAF3;
CD4+/CD8+ ratio is reversed	1	1	1.63934	29.8313	0.0335165	1	1	1	ATM;
CD4+/CD8+ ratio often reversed	1	1	1.63934	29.8313	0.0335165	1	1	1	ADA;
Central Nervous System	29	887	47.541	0.975645	0.62512	1	1	1	ATM; BCKDHB; DHCR24; EBP; FBXO7; HCCS; HLA-DRB1; MMAB; NDUFAF3; SMN1; ARSA; CPT1A; GAA; DHCR7; NBN; DNASE1; LRP5; FCGR2B; F13A1; FUCA1; NPC2; CTSC; KIAA0196; ASAH1; PPT1; HEXA; CSTB; FTL; GALNS;
Ceramidase deficiency	1	1	1.63934	29.8313	0.0335165	1	1	1	ASAH1;
Cerebellar ataxia	3	27	4.91803	3.32441	0.0591802	1	1	1	ATM; NPC2; FTL;
Cerebellar atrophy	1	56	1.63934	0.537933	0.856161	1	1	1	NDUFAF3;
Cerebellar cortical degeneration	1	1	1.63934	29.8313	0.0335165	1	1	1	ATM;
Cerebellar lesions	1	18	1.63934	1.67294	0.460209	1	1	1	NDUFAF3;
Cerebellar signs	1	11	1.63934	2.73657	0.313434	1	1	1	FTL;
Cerebellar vermis hypoplasia	1	9	1.63934	3.34402	0.264723	1	1	1	KIAA0196;
Cerebral artery aneurysm	1	1	1.63934	29.8313	0.0335165	1	1	1	GAA;
Cerebral atrophy	1	48	1.63934	0.62757	0.809528	1	1	1	FUCA1;
Cerebral atrophy, progressive	1	3	1.63934	10.0099	0.0972687	1	1	1	PPT1;
Cerebral edema	1	8	1.63934	3.7615	0.239108	1	1	1	BCKDHB;
Cerebral thrombosis	1	4	1.63934	7.51363	0.127575	1	1	1	F13A1;
Cerebral white matter abnormalities	1	2	1.63934	14.9899	0.0659274	1	1	1	ARSA;
Cervical myelopathy	1	6	1.63934	5.01325	0.185216	1	1	1	GALNS;
Cervical platyspondyly	1	1	1.63934	29.8313	0.0335165	1	1	1	FUCA1;
Cervical subluxation	1	2	1.63934	14.9899	0.0659274	1	1	1	GALNS;
Characteristic cell-within-cell histologic change	1	1	1.63934	29.8313	0.0335165	1	1	1	KRT4;
Chest	8	243	13.1148	0.983289	0.580914	1	1	1	EBP; HCCS; ADA; GAA; LRP5; FUCA1; KIAA0196; GALNS;
Childhood onset has been reported in 1 family	1	1	1.63934	29.8313	0.0335165	1	1	1	FBXO7;
Child often can sit unsupported but never ambulates	1	1	1.63934	29.8313	0.0335165	1	1	1	SMN1;
Choanal atresia	1	17	1.63934	1.77129	0.441307	1	1	1	NBN;
Cholecystitis	1	3	1.63934	10.0099	0.0972687	1	1	1	ARSA;
Chondroitin 6-sulfate excretion in urine	1	1	1.63934	29.8313	0.0335165	1	1	1	GALNS;
Chordee	1	5	1.63934	6.0139	0.15688	1	1	1	HCCS;
Chorea	1	14	1.63934	2.15058	0.380608	1	1	1	ARSA;
Choreoathetosis	2	17	3.27869	3.52504	0.108912	1	1	1	ATM; FTL;
Chorio-retinitis	1	1	1.63934	29.8313	0.0335165	1	1	1	HLA-DRB1;
Chromosomal hypersensitivity to ionizing radiation and alkylating agents	1	1	1.63934	29.8313	0.0335165	1	1	1	NBN;
Chronic denervation seen on EMG	1	3	1.63934	10.0099	0.0972687	1	1	1	SMN1;
Chronic diarrhea	1	4	1.63934	7.51363	0.127575	1	1	1	HEXB;
Circumscribed clumps of keratin filaments (some associated with desmosomes)	2	2	3.27869	29.8313	0.00110555	1	0.452537	1	KRT10; KRT1;
CIRRHOSIS, FAMILIAL	2	2	3.27869	29.8313	0.00110555	1	0.452537	1	KRT18; KRT8;
Cirrhosis if untreated	1	1	1.63934	29.8313	0.0335165	1	1	1	GALT;
Classic severe (onset of symptoms 4 to 7 days of age)	1	3	1.63934	10.0099	0.0972687	1	1	1	BCKDHB;
Claw-like volar curve	1	1	1.63934	29.8313	0.0335165	1	1	1	CTSC;
Cleavage within basal keratinocytes	2	3	3.27869	19.9206	0.00324488	1	0.982533	1	KRT5; KRT14;
Cleft lip	1	43	1.63934	0.700527	0.773135	1	1	1	NBN;
Cleft lip (in some patients)	1	6	1.63934	5.01325	0.185216	1	1	1	IL1B;
Cleft palate	4	97	6.55738	1.23311	0.411088	1	1	1	DHCR24; DHCR7; NBN; KIAA0196;
Cleft palate (in some patients)	1	7	1.63934	4.2981	0.212615	1	1	1	IL1B;
Cleft palate (rare)	1	4	1.63934	7.51363	0.127575	1	1	1	RB1;
Clinical variability	1	6	1.63934	5.01325	0.185216	1	1	1	LRP5;
Clumping of keratin filaments in basal epidermal cells	2	2	3.27869	29.8313	0.00110555	1	0.452537	1	KRT5; KRT14;
Coarctation of aorta	1	6	1.63934	5.01325	0.185216	1	1	1	DHCR7;
Coarse facial features	1	15	1.63934	2.00731	0.401529	1	1	1	FUCA1;
Coarse facies	1	28	1.63934	1.07567	0.617806	1	1	1	CTSA;
Coarse, sparse hair	1	1	1.63934	29.8313	0.0335165	1	1	1	EBP;
Cognitive decline in older patients	1	1	1.63934	29.8313	0.0335165	1	1	1	PPT1;
Cognitive defects develop later in the disease	1	1	1.63934	29.8313	0.0335165	1	1	1	FTL;
Cognitive dysfunction	1	3	1.63934	10.0099	0.0972687	1	1	1	HLA-DRB1;
Coloboma	1	6	1.63934	5.01325	0.185216	1	1	1	KIAA0196;
Colorectal cancer (in some patients)	1	4	1.63934	7.51363	0.127575	1	1	1	IL1B;
Colpocephaly	1	2	1.63934	14.9899	0.0659274	1	1	1	HCCS;
Coma	4	48	6.55738	2.49164	0.0741027	1	1	1	BCKDHB; MMAB; NDUFAF3; CPT1A;
Complement deficiency (e.g. C2 and C4 null alleles) are susceptible to developing SLE	2	6	3.27869	9.97687	0.0151987	1	1	1	DNASE1; FCGR2B;
Conduction abnormalities	1	1	1.63934	29.8313	0.0335165	1	1	1	DES;
Conductive hearing loss	1	22	1.63934	1.36891	0.529726	1	1	1	LRP5;
Congenital cardiac malformations have been rarely reported in severe cases	1	1	1.63934	29.8313	0.0335165	1	1	1	SMN1;
Congenital cirrhosis	2	2	3.27869	29.8313	0.00110555	1	0.452537	1	KRT18; KRT8;
Congenital heart defect	1	21	1.63934	1.43406	0.51322	1	1	1	FANCD2;
Congenital ichthyosiform erythroderma	1	1	1.63934	29.8313	0.0335165	1	1	1	EBP;
Congenital malalignment of great toenails	1	1	1.63934	29.8313	0.0335165	1	1	1	KRT14;
Congenital nuclear cataract (in some patients)	1	1	1.63934	29.8313	0.0335165	1	1	1	FTL;
Congenital palmoplantar keratosis	1	1	1.63934	29.8313	0.0335165	1	1	1	CTSC;
Conjunctivitis	1	17	1.63934	1.77129	0.441307	1	1	1	ICOS;
Constipation	1	41	1.63934	0.73469	0.756733	1	1	1	DHCR7;
Constipation due to smooth muscle involvement	1	1	1.63934	29.8313	0.0335165	1	1	1	DES;
Constricted iliac wings	1	2	1.63934	14.9899	0.0659274	1	1	1	GALNS;
Contractures of the hands	1	2	1.63934	14.9899	0.0659274	1	1	1	DHCR24;
Corneal opacities	1	15	1.63934	2.00731	0.401529	1	1	1	GALNS;
Cough	1	2	1.63934	14.9899	0.0659274	1	1	1	HLA-DRB1;
Coxa valga	2	22	3.27869	2.72426	0.166603	1	1	1	FUCA1; GALNS;
Cranial hyperostosis	1	3	1.63934	10.0099	0.0972687	1	1	1	CA2;
Cranial osteosclerosis	1	1	1.63934	29.8313	0.0335165	1	1	1	LRP5;
Cranium	1	2	1.63934	14.9899	0.0659274	1	1	1	HEXB;
Cryptorchidism	2	101	3.27869	0.593614	0.863675	1	1	1	POLA1; DHCR7;
Cupping and flaring of costochondral junctions	1	1	1.63934	29.8313	0.0335165	1	1	1	ADA;
Curly hair	1	4	1.63934	7.51363	0.127575	1	1	1	JUP;
Cutaneous telangiectasia	1	1	1.63934	29.8313	0.0335165	1	1	1	ATM;
Cyclic neutropenia	1	1	1.63934	29.8313	0.0335165	1	1	1	ELANE;
CYCLIC NEUTROPENIA	1	1	1.63934	29.8313	0.0335165	1	1	1	ELANE;
Cystic kidneys	1	3	1.63934	10.0099	0.0972687	1	1	1	DHCR7;
Cytolysis	2	2	3.27869	29.8313	0.00110555	1	0.452537	1	KRT10; KRT1;
Cytolysis of keratinocytes in spinous and granular layers	1	2	1.63934	14.9899	0.0659274	1	1	1	KRT1;
Dandy-Walker malformation	2	12	3.27869	4.99259	0.0587713	1	1	1	EBP; KIAA0196;
Deafness	1	20	1.63934	1.50573	0.496145	1	1	1	POLA1;
Death between 2 years of age and young adulthood	1	1	1.63934	29.8313	0.0335165	1	1	1	SMN1;
Death in untreated children	1	3	1.63934	10.0099	0.0972687	1	1	1	BCKDHB;
Death secondary to respiratory infection or failure	1	1	1.63934	29.8313	0.0335165	1	1	1	SMN1;
Death secondary to respiratory infection or failure before age 2 years	1	1	1.63934	29.8313	0.0335165	1	1	1	SMN1;
Decreased activity of mitochondrial respiratory chain complex I	1	18	1.63934	1.67294	0.460209	1	1	1	NDUFAF3;
Decreased activity of PPT1	1	1	1.63934	29.8313	0.0335165	1	1	1	PPT1;
Decreased adenosylcobalamin (AdoCbl)	1	5	1.63934	6.0139	0.15688	1	1	1	MMAB;
Decreased arylsulfatase A (ARSA) activity in urine, leukocytes, fibroblasts	1	1	1.63934	29.8313	0.0335165	1	1	1	ARSA;
Decreased auditory brainstem responses	1	1	1.63934	29.8313	0.0335165	1	1	1	PDK3;
Decreased bone mineral density	1	3	1.63934	10.0099	0.0972687	1	1	1	LRP5;
Decreased CPT1 activity	1	1	1.63934	29.8313	0.0335165	1	1	1	CPT1A;
Decreased fetal movement	2	10	3.27869	5.99011	0.0418252	1	1	1	SMN1; DHCR7;
Decreased gonial angle (endosteal hyperostosis)	1	1	1.63934	29.8313	0.0335165	1	1	1	LRP5;
Decreased liver function, progressive	1	1	1.63934	29.8313	0.0335165	1	1	1	GALT;
Decreased long-chain fatty acid oxidation	1	1	1.63934	29.8313	0.0335165	1	1	1	CPT1A;
Decreased methylmalonyl-CoA mutase (MUT,	1	4	1.63934	7.51363	0.127575	1	1	1	MMAB;
Decreased serum ferritin	1	1	1.63934	29.8313	0.0335165	1	1	1	FTL;
Decreased vibratory sense in the lower limbs	1	9	1.63934	3.34402	0.264723	1	1	1	KIAA0196;
Decreased visual acuity	1	21	1.63934	1.43406	0.51322	1	1	1	LRP5;
Decreased white matter	1	1	1.63934	29.8313	0.0335165	1	1	1	DHCR24;
Deep fissures of skin creases	1	1	1.63934	29.8313	0.0335165	1	1	1	KRT1;
Deep vein thrombosis	1	5	1.63934	6.0139	0.15688	1	1	1	F13A1;
Defective antibody production	1	2	1.63934	14.9899	0.0659274	1	1	1	ICOS;
Defective B cell differentiation	1	1	1.63934	29.8313	0.0335165	1	1	1	ATM;
Deficiency of alpha-1,4-glucosidase (acid maltase)	1	1	1.63934	29.8313	0.0335165	1	1	1	GAA;
Degeneration of anterior horn cells	1	2	1.63934	14.9899	0.0659274	1	1	1	SMN1;
Degeneration of basal epidermal cells	1	1	1.63934	29.8313	0.0335165	1	1	1	KRT5;
Degeneration of spinal cord anterior horn cells	1	1	1.63934	29.8313	0.0335165	1	1	1	SMN1;
Degeneration of the lateral corticospinal tracts	1	6	1.63934	5.01325	0.185216	1	1	1	KIAA0196;
Dehydration	1	23	1.63934	1.30942	0.545681	1	1	1	MMAB;
Delayed nerve conduction velocity	1	1	1.63934	29.8313	0.0335165	1	1	1	ARSA;
Delayed psychomotor development	1	30	1.63934	1.00399	0.64339	1	1	1	KIAA0196;
Delayed psychomotor development, severe	1	5	1.63934	6.0139	0.15688	1	1	1	DHCR24;
Delayed puberty	1	16	1.63934	1.88193	0.421754	1	1	1	ATM;
Deletions in NAIP gene (	1	2	1.63934	14.9899	0.0659274	1	1	1	SMN1;
Delivery	1	43	1.63934	0.700527	0.773135	1	1	1	DHCR7;
Delusions	1	28	1.63934	1.07567	0.617806	1	1	1	ARSA;
Dementia	2	34	3.27869	1.76304	0.316635	1	1	1	NPC2; HEXA;
Demyelination	1	9	1.63934	3.34402	0.264723	1	1	1	ARSA;
Dense bones with thick cortices	1	1	1.63934	29.8313	0.0335165	1	1	1	LRP5;
Dense, rough, and bristly hair	1	1	1.63934	29.8313	0.0335165	1	1	1	JUP;
Dense whorls of keratin filaments in the lower and middle spinous layers	2	2	3.27869	29.8313	0.00110555	1	0.452537	1	KRT10; KRT1;
Dental crowding	1	29	1.63934	1.0386	0.630816	1	1	1	DHCR7;
Depigmented spots	1	1	1.63934	29.8313	0.0335165	1	1	1	NBN;
Depressed nasal bridge	1	38	1.63934	0.792677	0.729922	1	1	1	KIAA0196;
Depression	2	37	3.27869	1.62013	0.354041	1	1	1	HLA-DRB1; PPT1;
DESMOSTEROLOSIS	1	1	1.63934	29.8313	0.0335165	1	1	1	DHCR24;
Developmental delay	4	141	6.55738	0.848335	0.709721	1	1	1	MMAB; NDUFAF3; NPC2; PPT1;
Diabetes mellitus	1	27	1.63934	1.1155	0.604345	1	1	1	ATM;
Diabetes mellitus, insulin-dependent	1	2	1.63934	14.9899	0.0659274	1	1	1	IL2RA;
Diaphragm	1	20	1.63934	1.50573	0.496145	1	1	1	HCCS;
Diaphragmatic hernia	1	10	1.63934	3.00996	0.289489	1	1	1	HCCS;
Diaphragmatic paralysis	1	2	1.63934	14.9899	0.0659274	1	1	1	GAA;
Diaphyseal sclerosis	1	3	1.63934	10.0099	0.0972687	1	1	1	CA2;
Diarrhea	4	56	6.55738	2.13576	0.115046	1	1	1	GALT; ADA; CPT1A; ICOS;
Diarrhea and recurrent GI infections	1	1	1.63934	29.8313	0.0335165	1	1	1	NBN;
Diarrhea due to smooth muscle involvement	1	1	1.63934	29.8313	0.0335165	1	1	1	DES;
Difficulty swallowing	1	1	1.63934	29.8313	0.0335165	1	1	1	ASAH1;
Difficulty walking	1	11	1.63934	2.73657	0.313434	1	1	1	ASAH1;
Diffuse hyperkeratosis (in some patients)	1	1	1.63934	29.8313	0.0335165	1	1	1	DSG1;
Diffuse, symmetrical osteosclerosis	1	1	1.63934	29.8313	0.0335165	1	1	1	LRP5;
Dihydrolipoyl dehydrogenase (E3)-deficient	1	3	1.63934	10.0099	0.0972687	1	1	1	BCKDHB;
Dilated cardiomyopathy	2	10	3.27869	5.99011	0.0418252	1	1	1	DES; JUP;
Diplopia	1	8	1.63934	3.7615	0.239108	1	1	1	HLA-DRB1;
Discoid rash	2	6	3.27869	9.97687	0.0151987	1	1	1	DNASE1; FCGR2B;
Discrete 2 to 5-mm hyper- and hypopigmented macules	1	1	1.63934	29.8313	0.0335165	1	1	1	KRT5;
Disease exacerbation during summer due to heat	2	3	3.27869	19.9206	0.00324488	1	0.982533	1	KRT5; KRT14;
Disinhibition	1	10	1.63934	3.00996	0.289489	1	1	1	FTL;
Dislocation of patella	1	2	1.63934	14.9899	0.0659274	1	1	1	EBP;
Disorders with overlapping phenotypes can be caused by mutation in the keratin-14 gene (	1	1	1.63934	29.8313	0.0335165	1	1	1	KRT5;
Disorganized thinking	1	1	1.63934	29.8313	0.0335165	1	1	1	ARSA;
Distal muscle weakness and atrophy, predominantly lower limbs, due to peripheral neuropathy	1	1	1.63934	29.8313	0.0335165	1	1	1	PDK3;
Distal muscle weakness occurs initially	1	1	1.63934	29.8313	0.0335165	1	1	1	DES;
Distal sensory impairment, predominantly lower limbs	1	1	1.63934	29.8313	0.0335165	1	1	1	PDK3;
Distal Xp22.3 segmental monosomy	1	1	1.63934	29.8313	0.0335165	1	1	1	HCCS;
Doll-like face	1	1	1.63934	29.8313	0.0335165	1	1	1	HEXB;
Double outlet right ventricle	1	1	1.63934	29.8313	0.0335165	1	1	1	KIAA0196;
Downslanting palpebral fissures	2	57	3.27869	1.05176	0.577617	1	1	1	EBP; KIAA0196;
Dural and choroid plexus calcifications	1	1	1.63934	29.8313	0.0335165	1	1	1	CTSC;
Dwarfism	1	9	1.63934	3.34402	0.264723	1	1	1	CTSA;
Dysarthria	5	118	8.19672	1.26646	0.361589	1	1	1	FBXO7; ARSA; NPC2; CSTB; FTL;
Dysarthric speech	1	4	1.63934	7.51363	0.127575	1	1	1	ATM;
Dysgammaglobulinemia	1	2	1.63934	14.9899	0.0659274	1	1	1	NBN;
Dysmorphic facial features may not be present	1	1	1.63934	29.8313	0.0335165	1	1	1	DHCR24;
Dysostosis multiplex	2	9	3.27869	6.65494	0.0341873	1	1	1	FUCA1; CTSA;
Dysphagia	2	67	3.27869	0.894807	0.666929	1	1	1	NPC2; FTL;
Dysphonia	1	6	1.63934	5.01325	0.185216	1	1	1	FTL;
Dysplastic ears	1	9	1.63934	3.34402	0.264723	1	1	1	EBP;
Dyspnea	2	13	3.27869	4.60884	0.0679908	1	1	1	HLA-DRB1; GAA;
Dystonia	4	71	6.55738	1.6846	0.212009	1	1	1	ATM; FBXO7; ARSA; NPC2;
Dystonia, focal	1	1	1.63934	29.8313	0.0335165	1	1	1	FTL;
Dystrophic nails	2	14	3.27869	4.27987	0.0776525	1	1	1	KRT5; KRT14;
Dystrophic nails (less common)	2	2	3.27869	29.8313	0.00110555	1	0.452537	1	KRT5; KRT14;
Early adult onset has been reported	2	3	3.27869	19.9206	0.00324488	1	0.982533	1	KRT5; KRT14;
Early blindness	1	1	1.63934	29.8313	0.0335165	1	1	1	HEXB;
Early death from respiratory failure may occur	1	1	1.63934	29.8313	0.0335165	1	1	1	NPC2;
Early death (in some patients)	1	1	1.63934	29.8313	0.0335165	1	1	1	ASAH1;
Early onset prostate cancer	1	12	1.63934	2.50871	0.336586	1	1	1	CD82;
Ears	15	442	24.5902	1.01303	0.52828	1	1	1	DHCR24; EBP; HCCS; NDUFAF3; PDK3; POLA1; GAA; DHCR7; ICOS; NBN; AP1S2; LRP5; FUCA1; KIAA0196; GALNS;
ECTOPIA LENTIS ET PUPILLAE	1	1	1.63934	29.8313	0.0335165	1	1	1	ADAMTSL4;
Ectopia lentis, uncomplicated	1	1	1.63934	29.8313	0.0335165	1	1	1	ADAMTSL4;
Ectopic lens	1	1	1.63934	29.8313	0.0335165	1	1	1	ADAMTSL4;
Ectopic pupil	1	1	1.63934	29.8313	0.0335165	1	1	1	ADAMTSL4;
Eczema	1	16	1.63934	1.88193	0.421754	1	1	1	DHCR7;
EEG - alpha abolished, continuous spike waves, intense myoclonus on photic stimulation (stage 3)	1	1	1.63934	29.8313	0.0335165	1	1	1	CSTB;
EEG - alpha slowing, 4-6 Hz spike waves, myoclonus on photic stimulation (stage 2)	1	1	1.63934	29.8313	0.0335165	1	1	1	CSTB;
EEG - polyspike on photic stimulation (stage 1)	1	1	1.63934	29.8313	0.0335165	1	1	1	CSTB;
Effaced gyral pattern	1	1	1.63934	29.8313	0.0335165	1	1	1	DHCR24;
EKG abnormalities	1	2	1.63934	14.9899	0.0659274	1	1	1	JUP;
Electroencephalogram (EEG) abnormalities	1	1	1.63934	29.8313	0.0335165	1	1	1	PPT1;
Electron Microscopy	5	27	8.19672	5.53332	0.00163937	1	0.647084	1	DSG1; KRT5; KRT10; KRT14; KRT1;
Elevated 7-dehydrocholesterol	1	1	1.63934	29.8313	0.0335165	1	1	1	DHCR7;
Elevated 8(9)-cholestenol	1	2	1.63934	14.9899	0.0659274	1	1	1	EBP;
Elevated 8-dehydrocholesterol	1	2	1.63934	14.9899	0.0659274	1	1	1	EBP;
Elevated AST and LDH, especially infantile-onset	1	1	1.63934	29.8313	0.0335165	1	1	1	GAA;
Elevated bone mass	1	1	1.63934	29.8313	0.0335165	1	1	1	LRP5;
Elevated creatine kinase	1	3	1.63934	10.0099	0.0972687	1	1	1	CPT1A;
Elevated CSF protein	1	2	1.63934	14.9899	0.0659274	1	1	1	ARSA;
Elevated erythrocyte sedimentation rate (ESR)	1	1	1.63934	29.8313	0.0335165	1	1	1	HLA-DRB1;
Elevated ferritin L subunit	1	1	1.63934	29.8313	0.0335165	1	1	1	FTL;
Elevated free carnitine	1	1	1.63934	29.8313	0.0335165	1	1	1	CPT1A;
Elevated liver function tests may occur	1	1	1.63934	29.8313	0.0335165	1	1	1	HLA-DRB1;
Elevated plasma alloisoleucine	1	3	1.63934	10.0099	0.0972687	1	1	1	BCKDHB;
Elevated plasma branched chain amino acids (leucine, isoleucine, valine)	1	3	1.63934	10.0099	0.0972687	1	1	1	BCKDHB;
Elevated plasma desmosterol	1	1	1.63934	29.8313	0.0335165	1	1	1	DHCR24;
Elevated plasma zinc	1	1	1.63934	29.8313	0.0335165	1	1	1	ALB;
Elevated serum angiotensin-converting enzyme (ACE)	1	1	1.63934	29.8313	0.0335165	1	1	1	HLA-DRB1;
Elevated serum creatine kinase	1	4	1.63934	7.51363	0.127575	1	1	1	GAA;
Elevated serum ferritin	1	1	1.63934	29.8313	0.0335165	1	1	1	FTL;
Elevated serum levels of 2-prime deoxyadenosine	1	1	1.63934	29.8313	0.0335165	1	1	1	ADA;
Elevated serum levels of adenosine	1	1	1.63934	29.8313	0.0335165	1	1	1	ADA;
Elevated sweat chloride	1	1	1.63934	29.8313	0.0335165	1	1	1	FUCA1;
Elevated transaminases	1	6	1.63934	5.01325	0.185216	1	1	1	CPT1A;
Elevated urine ceramide levels	1	1	1.63934	29.8313	0.0335165	1	1	1	ASAH1;
Elongated mandible	1	1	1.63934	29.8313	0.0335165	1	1	1	LRP5;
EMG shows chronic denervation	1	2	1.63934	14.9899	0.0659274	1	1	1	ASAH1;
EMG shows myopathy	1	2	1.63934	14.9899	0.0659274	1	1	1	DES;
EMG shows neurogenic abnormalities	1	3	1.63934	10.0099	0.0972687	1	1	1	SMN1;
EMG shows neuropathic changes	1	1	1.63934	29.8313	0.0335165	1	1	1	ARSA;
EM of skin biopsy and peripheral blood lymphocytes shows membrane-bound fibrillogranular inclusions	1	1	1.63934	29.8313	0.0335165	1	1	1	CTSA;
Emotional lability	3	30	4.91803	2.99208	0.0765739	1	1	1	HLA-DRB1; ARSA; FTL;
Encephalopathy	1	21	1.63934	1.43406	0.51322	1	1	1	NDUFAF3;
Encephalopathy, recurrent	1	1	1.63934	29.8313	0.0335165	1	1	1	CPT1A;
Endocrine	1	44	1.63934	0.684609	0.780922	1	1	1	IL2RA;
Endocrine Features	3	155	4.91803	0.579268	0.905037	1	1	1	ATM; NBN; KIAA0196;
Endosteal sclerosis of cranium	1	1	1.63934	29.8313	0.0335165	1	1	1	LRP5;
Enlarged corneal diameters (in some patients)	1	1	1.63934	29.8313	0.0335165	1	1	1	ADAMTSL4;
Enlarged lacrimal glands	1	1	1.63934	29.8313	0.0335165	1	1	1	HLA-DRB1;
Enlarged mandible	1	2	1.63934	14.9899	0.0659274	1	1	1	LRP5;
Enlarged salivary glands	1	1	1.63934	29.8313	0.0335165	1	1	1	HLA-DRB1;
Enteritis, recurrent	1	2	1.63934	14.9899	0.0659274	1	1	1	ICOS;
Eosinophilia	2	11	3.27869	5.44605	0.050035	1	1	1	ADA; ELANE;
Eosinophils and neutrophils in the epidermis	2	2	3.27869	29.8313	0.00110555	1	0.452537	1	KRT10; KRT1;
Epicanthal folds	1	61	1.63934	0.493848	0.879394	1	1	1	DHCR7;
Epidermal spongiosis	2	2	3.27869	29.8313	0.00110555	1	0.452537	1	KRT10; KRT1;
Epidermolysis bullosa simplex	2	2	3.27869	29.8313	0.00110555	1	0.452537	1	KRT5; KRT14;
EPIDERMOLYSIS BULLOSA SIMPLEX, DOWLING-MEARA TYPE	2	2	3.27869	29.8313	0.00110555	1	0.452537	1	KRT5; KRT14;
EPIDERMOLYSIS BULLOSA SIMPLEX, GENERALIZED	2	2	3.27869	29.8313	0.00110555	1	0.452537	1	KRT5; KRT14;
EPIDERMOLYSIS BULLOSA SIMPLEX, LOCALIZED	2	3	3.27869	19.9206	0.00324488	1	0.982533	1	KRT5; KRT14;
Epiphyseal deformities of tubular bones	1	2	1.63934	14.9899	0.0659274	1	1	1	GALNS;
Epiphyseal stippling	1	2	1.63934	14.9899	0.0659274	1	1	1	EBP;
Episodes of ventricular tachycardia	1	1	1.63934	29.8313	0.0335165	1	1	1	JUP;
Erythema, blisters, pustules (cyclical, explosive episodes)	2	2	3.27869	29.8313	0.00110555	1	0.452537	1	KRT10; KRT1;
Erythematous malar rash	2	6	3.27869	9.97687	0.0151987	1	1	1	DNASE1; FCGR2B;
Estimated incidence 1/20,000 - 1/40,000	1	1	1.63934	29.8313	0.0335165	1	1	1	DHCR7;
Evidence of anticipation	1	21	1.63934	1.43406	0.51322	1	1	1	ETV6;
Ewing sarcoma	1	1	1.63934	29.8313	0.0335165	1	1	1	RB1;
Exaggerated cellular immune processes	1	1	1.63934	29.8313	0.0335165	1	1	1	HLA-DRB1;
Exercise intolerance	1	37	1.63934	0.814095	0.720355	1	1	1	NDUFAF3;
Exon 7 of SMN1 is absent in 95.6% of SMA1 patients	1	1	1.63934	29.8313	0.0335165	1	1	1	SMN1;
Extensor plantar responses	4	65	6.55738	1.84008	0.170577	1	1	1	FBXO7; NDUFAF3; KIAA0196; FTL;
Extensor plantar responses (later)	1	1	1.63934	29.8313	0.0335165	1	1	1	ARSA;
External Features	4	180	6.55738	0.664539	0.869621	1	1	1	ADA; LRP5; FUCA1; GALNS;
External Genitalia (Female)	3	50	4.91803	1.79549	0.23356	1	1	1	DHCR24; GALT; HCCS;
External Genitalia (Male)	4	151	6.55738	0.792157	0.76033	1	1	1	DHCR24; HCCS; DHCR7; KIAA0196;
Extrapyramidal signs	2	19	3.27869	3.15418	0.131302	1	1	1	FBXO7; FTL;
Extrapyramidal signs show a favorable response to levodopa	1	1	1.63934	29.8313	0.0335165	1	1	1	FBXO7;
Eyes	26	826	42.623	0.939351	0.715121	1	1	1	DHCR24; EBP; FBXO7; GALT; HCCS; HLA-DRB1; NDUFAF3; POLA1; RB1; ARSA; DHCR7; ICOS; LRP5; KRT3; KRT4; ADAMTSL4; FUCA1; KRT14; HEXB; NPC2; KIAA0196; ASAH1; PPT1; HEXA; FTL; GALNS;
Face	10	433	16.3934	0.689618	0.942464	1	1	1	DHCR24; EBP; DHCR7; NBN; LRP5; FUCA1; KIAA0196; ASAH1; FTL; GALNS;
Facial capillary hemangioma	1	2	1.63934	14.9899	0.0659274	1	1	1	DHCR7;
Facial muscle sparing	1	1	1.63934	29.8313	0.0335165	1	1	1	SMN1;
Facial weakness	2	16	3.27869	3.74522	0.0981489	1	1	1	DES; ASAH1;
Facies	1	22	1.63934	1.36891	0.529726	1	1	1	HEXB;
Failure to thrive	7	202	11.4754	1.03518	0.524353	1	1	1	DHCR24; GALT; MMAB; NDUFAF3; ADA; DHCR7; ASAH1;
Failure to thrive (early infancy)	1	1	1.63934	29.8313	0.0335165	1	1	1	EBP;
Falciform retinal folds	1	2	1.63934	14.9899	0.0659274	1	1	1	LRP5;
Familial acute myelogenous leukemia (AML)	1	21	1.63934	1.43406	0.51322	1	1	1	ETV6;
FARBER LIPOGRANULOMATOSIS	1	1	1.63934	29.8313	0.0335165	1	1	1	ASAH1;
Fasciculations	1	15	1.63934	2.00731	0.401529	1	1	1	ASAH1;
Fatty acid pattern of serum lecithin shows increased arachidonic acid and decreased linoleic acid	1	1	1.63934	29.8313	0.0335165	1	1	1	PPT1;
Feeding problems	1	11	1.63934	2.73657	0.313434	1	1	1	BCKDHB;
Feet	7	345	11.4754	0.606121	0.960835	1	1	1	EBP; FBXO7; PDK3; DHCR7; LRP5; CTSC; KIAA0196;
Felty syndrome	1	8	1.63934	3.7615	0.239108	1	1	1	HLA-DRB1;
Fetal ascites	1	3	1.63934	10.0099	0.0972687	1	1	1	NPC2;
Fever	3	17	4.91803	5.2788	0.0174269	1	1	1	HLA-DRB1; KRT18; KRT8;
Fever of central origin	1	1	1.63934	29.8313	0.0335165	1	1	1	GAA;
Fibrofatty replacement of right ventricular myocardium	1	1	1.63934	29.8313	0.0335165	1	1	1	TGFB3;
Filiform epithelial downgrowth of epidermal rete ridges	1	1	1.63934	29.8313	0.0335165	1	1	1	KRT5;
Firm muscles	1	2	1.63934	14.9899	0.0659274	1	1	1	GAA;
Five clinical variants of MSUD unassociated with genotype	1	3	1.63934	10.0099	0.0972687	1	1	1	BCKDHB;
Flaring of rib cage	1	2	1.63934	14.9899	0.0659274	1	1	1	GALNS;
Flat-appearing iris	1	1	1.63934	29.8313	0.0335165	1	1	1	ADAMTSL4;
Flat face	1	20	1.63934	1.50573	0.496145	1	1	1	EBP;
Flattened forehead (adolescence)	1	1	1.63934	29.8313	0.0335165	1	1	1	LRP5;
Flexion contractures	1	8	1.63934	3.7615	0.239108	1	1	1	PPT1;
Foam cells contain polymorphic cytoplasmic inclusions consisting of lamellar osmiophilic membranes on electron microscopy	1	2	1.63934	14.9899	0.0659274	1	1	1	NPC2;
Foam cells in visceral organs and CNS	1	2	1.63934	14.9899	0.0659274	1	1	1	NPC2;
Foam cells on bone marrow biopsy	1	2	1.63934	14.9899	0.0659274	1	1	1	NPC2;
Focal hyperkeratosis (in some patients)	1	1	1.63934	29.8313	0.0335165	1	1	1	DSG1;
Follicular atrophoderma	1	1	1.63934	29.8313	0.0335165	1	1	1	EBP;
Fracture resistance	1	1	1.63934	29.8313	0.0335165	1	1	1	LRP5;
Frequent caries	1	3	1.63934	10.0099	0.0972687	1	1	1	GALNS;
Frequent falls	1	7	1.63934	4.2981	0.212615	1	1	1	ASAH1;
Frequent fungal, viral, and opportunistic infections	1	1	1.63934	29.8313	0.0335165	1	1	1	ADA;
Frequent upper respiratory tract infections	1	4	1.63934	7.51363	0.127575	1	1	1	GALNS;
Frontal bossing	2	58	3.27869	1.03363	0.587266	1	1	1	DHCR24; EBP;
Frontal lobe hypoplasia	1	2	1.63934	14.9899	0.0659274	1	1	1	DHCR7;
Frontotemporal/subcortical dementia	1	1	1.63934	29.8313	0.0335165	1	1	1	FTL;
FUCOSIDOSIS	1	1	1.63934	29.8313	0.0335165	1	1	1	FUCA1;
Gait disability	1	1	1.63934	29.8313	0.0335165	1	1	1	FTL;
Gait disturbances	1	9	1.63934	3.34402	0.264723	1	1	1	ARSA;
Galactose-1-phosphate uridyltransferase deficiency	1	1	1.63934	29.8313	0.0335165	1	1	1	GALT;
GALACTOSEMIA	1	1	1.63934	29.8313	0.0335165	1	1	1	GALT;
Gallbladder dysfunction	1	1	1.63934	29.8313	0.0335165	1	1	1	ARSA;
Gastric cancer, diffuse type, poorly differentiated, high-grade submucosal lesions	1	4	1.63934	7.51363	0.127575	1	1	1	IL1B;
Gastrointestinal	16	425	26.2295	1.12374	0.341694	1	1	1	BCKDHB; DES; GALT; HCCS; HLA-DRB1; MMAB; NDUFAF3; ADA; CPT1A; DHCR7; ICOS; NBN; NPC2; KIAA0196; ASAH1; FTL;
Generalized erythroderma	2	3	3.27869	19.9206	0.00324488	1	0.982533	1	KRT10; KRT1;
Generalized fatigue	1	1	1.63934	29.8313	0.0335165	1	1	1	HLA-DRB1;
Generalized lymphadenopathy	1	1	1.63934	29.8313	0.0335165	1	1	1	HLA-DRB1;
Generalized seizures	1	3	1.63934	10.0099	0.0972687	1	1	1	ASAH1;
Generalized tonic-clonic seizures (stage 2 and 3)	1	1	1.63934	29.8313	0.0335165	1	1	1	CSTB;
Genetic heterogeneity	3	142	4.91803	0.632296	0.868631	1	1	1	ATM; TGFB3; CTSC;
Genetic heterogeneity (see	1	18	1.63934	1.67294	0.460209	1	1	1	LRP5;
Genetic heterogeneity, see EVR1 (	1	1	1.63934	29.8313	0.0335165	1	1	1	LRP5;
Genetic heterogeneity (see NPC1,	1	1	1.63934	29.8313	0.0335165	1	1	1	NPC2;
Genitourinary	13	478	21.3115	0.81192	0.851931	1	1	1	ATM; DHCR24; EBP; GALT; HCCS; HLA-DRB1; ADA; ARSA; DHCR7; NBN; DNASE1; FCGR2B; KIAA0196;
Genu valgum	1	20	1.63934	1.50573	0.496145	1	1	1	GALNS;
GI	5	63	8.19672	2.37193	0.0567421	1	1	1	KRT18; KRT8; HEXB; CTSA; CA2;
Gingival nodules	1	1	1.63934	29.8313	0.0335165	1	1	1	DHCR24;
Gingival recession	1	1	1.63934	29.8313	0.0335165	1	1	1	CTSC;
Glaucoma	2	35	3.27869	1.71268	0.329164	1	1	1	EBP; HLA-DRB1;
Glioma	1	2	1.63934	14.9899	0.0659274	1	1	1	NBN;
Glucose intolerance	1	2	1.63934	14.9899	0.0659274	1	1	1	ATM;
Gm2-ganglioside accumulation	1	2	1.63934	14.9899	0.0659274	1	1	1	HEXA;
Gowers sign	1	6	1.63934	5.01325	0.185216	1	1	1	ASAH1;
Granular material in neurons	1	1	1.63934	29.8313	0.0335165	1	1	1	PPT1;
Granular osmiophilic cytoplasmic deposits (GROD) ultrastructurally in cells	1	1	1.63934	29.8313	0.0335165	1	1	1	PPT1;
Grayish enamel	1	2	1.63934	14.9899	0.0659274	1	1	1	GALNS;
Growth	22	609	36.0656	1.07812	0.37712	1	1	1	ATM; DHCR24; EBP; FANCD2; GALT; HCCS; HLA-DRB1; MMAB; NDUFAF3; ADA; DHCR7; NBN; LRP5; KRT5; FUCA1; KRT14; CTSA; CA2; KIAA0196; ASAH1; PPT1; GALNS;
Growth hormone deficiency	1	11	1.63934	2.73657	0.313434	1	1	1	KIAA0196;
Growth retardation	4	57	6.55738	2.09829	0.120758	1	1	1	NDUFAF3; KRT5; FUCA1; KRT14;
GU	4	73	6.55738	1.63846	0.226435	1	1	1	FANCD2; POLA1; RB1; HEXB;
Hair	8	240	13.1148	0.995579	0.565828	1	1	1	ATM; EBP; DHCR7; KRT10; JUP; KRT14; KRT1; KIAA0196;
Hallucinations	3	30	4.91803	2.99208	0.0765739	1	1	1	BCKDHB; ARSA; PPT1;
Hand muscle weakness	1	2	1.63934	14.9899	0.0659274	1	1	1	PDK3;
Hands	8	349	13.1148	0.684648	0.923131	1	1	1	DHCR24; EBP; DHCR7; LRP5; CTSC; KIAA0196; FTL; GALNS;
Hand tremor	2	3	3.27869	19.9206	0.00324488	1	0.982533	1	PDK3; SMN1;
Head	11	345	18.0328	0.951981	0.627046	1	1	1	ATM; DHCR24; HCCS; NDUFAF3; DHCR7; ICOS; NBN; LRP5; FUCA1; KIAA0196; PPT1;
Headache	1	12	1.63934	2.50871	0.336586	1	1	1	LRP5;
Head and Neck	31	954	50.8197	0.969665	0.650191	1	1	1	ATM; DHCR24; EBP; FBXO7; GALT; HCCS; HLA-DRB1; NDUFAF3; PDK3; RB1; ADA; ARSA; DSG1; GAA; DHCR7; ICOS; NBN; LRP5; KRT5; ADAMTSL4; FUCA1; KRT14; NPC2; CTSC; KIAA0196; ASAH1; PPT1; IL1B; HEXA; FTL; GALNS;
Hearing loss	5	41	8.19672	3.64436	0.0106084	1	1	1	EBP; HCCS; GAA; FUCA1; GALNS;
Hearing loss, sensorineural	1	38	1.63934	0.792677	0.729922	1	1	1	LRP5;
Hearing loss, sensorineural (in some patients)	1	3	1.63934	10.0099	0.0972687	1	1	1	PDK3;
Heart	16	351	26.2295	1.36064	0.111125	1	1	1	DES; DHCR24; HCCS; NDUFAF3; SMN1; CPT1A; GAA; DHCR7; TGFB3; DNASE1; LRP5; FCGR2B; JUP; FUCA1; KIAA0196; GALNS;
Heat intolerance	1	1	1.63934	29.8313	0.0335165	1	1	1	KRT14;
Heavy eyebrows	1	4	1.63934	7.51363	0.127575	1	1	1	FUCA1;
HEENT	3	28	4.91803	3.20572	0.0647461	1	1	1	FANCD2; CTSA; CA2;
Height	7	290	11.4754	0.721071	0.877394	1	1	1	ATM; HCCS; DHCR7; NBN; LRP5; FUCA1; GALNS;
HELLP syndrome	1	1	1.63934	29.8313	0.0335165	1	1	1	CPT1A;
Hematology	9	229	14.7541	1.17366	0.357723	1	1	1	GALT; HLA-DRB1; MMAB; ADA; NBN; DNASE1; FCGR2B; ELANE; NPC2;
Heme	5	78	8.19672	1.91584	0.116749	1	1	1	ETV6; FANCD2; HLA-DRB1; ELANE; CA2;
Hemivertebrae	2	12	3.27869	4.99259	0.0587713	1	1	1	EBP; KIAA0196;
Hemolytic anemia	3	24	4.91803	3.73979	0.043944	1	1	1	GALT; DNASE1; FCGR2B;
Hemorrhagic blisters	2	2	3.27869	29.8313	0.00110555	1	0.452537	1	KRT5; KRT14;
Hepatic failure	1	20	1.63934	1.50573	0.496145	1	1	1	NDUFAF3;
Hepatomegaly	9	130	14.7541	2.06738	0.0262959	1	1	1	GALT; MMAB; ADA; CPT1A; GAA; ICOS; FUCA1; NPC2; ASAH1;
Hepatomegaly may occur	1	1	1.63934	29.8313	0.0335165	1	1	1	HLA-DRB1;
Hepatosplenomegaly	1	3	1.63934	10.0099	0.0972687	1	1	1	CA2;
Hereditary nonpolyposis colorectal carcinoma	1	25	1.63934	1.2047	0.57601	1	1	1	PTPRJ;
Hernia	1	1	1.63934	29.8313	0.0335165	1	1	1	FUCA1;
Herpes infections	1	1	1.63934	29.8313	0.0335165	1	1	1	ICOS;
Hesitancy	1	3	1.63934	10.0099	0.0972687	1	1	1	HLA-DRB1;
Heterozygotes are not affected	2	2	3.27869	29.8313	0.00110555	1	0.452537	1	KRT5; KRT14;
Hexosaminidase A deficiency	1	1	1.63934	29.8313	0.0335165	1	1	1	HEXA;
Hexosaminidase B beta chain deficiency	1	1	1.63934	29.8313	0.0335165	1	1	1	HEXB;
High-frequency hearing loss	1	1	1.63934	29.8313	0.0335165	1	1	1	AP1S2;
High frequency in Finnish population	1	1	1.63934	29.8313	0.0335165	1	1	1	CSTB;
High incidence of E. coli sepsis in untreated neonates	1	1	1.63934	29.8313	0.0335165	1	1	1	GALT;
High intensity area in white matter on head MRI	1	3	1.63934	10.0099	0.0972687	1	1	1	HLA-DRB1;
High lumbar gibbus	1	1	1.63934	29.8313	0.0335165	1	1	1	HEXB;
Highly variable age at onset	1	18	1.63934	1.67294	0.460209	1	1	1	NDUFAF3;
Highly variable phenotype	1	51	1.63934	0.590662	0.82854	1	1	1	NDUFAF3;
Highly variable phenotype and age of onset	1	1	1.63934	29.8313	0.0335165	1	1	1	NPC2;
High myopia (in some patients)	1	1	1.63934	29.8313	0.0335165	1	1	1	ADAMTSL4;
Hip dislocation	1	28	1.63934	1.07567	0.617806	1	1	1	DHCR7;
Hip subluxation	1	4	1.63934	7.51363	0.127575	1	1	1	DHCR7;
Histiocytic infiltration of liver, spleen, and lungs	1	1	1.63934	29.8313	0.0335165	1	1	1	ASAH1;
HLA-DRB1 association	1	8	1.63934	3.7615	0.239108	1	1	1	HLA-DRB1;
Hoarse cry due to laryngeal involvement	1	1	1.63934	29.8313	0.0335165	1	1	1	ASAH1;
Hodgkin lymphoma	1	1	1.63934	29.8313	0.0335165	1	1	1	ATM;
Horizontal pendular nystagmus	1	2	1.63934	14.9899	0.0659274	1	1	1	LRP5;
Huge QRS complexes	1	1	1.63934	29.8313	0.0335165	1	1	1	GAA;
Hydrocephalus	4	49	6.55738	2.4408	0.0787351	1	1	1	DHCR24; HCCS; DHCR7; KIAA0196;
Hydronephrosis	4	38	6.55738	3.14716	0.0359727	1	1	1	EBP; DHCR7; NBN; KIAA0196;
Hydrops	1	7	1.63934	4.2981	0.212615	1	1	1	EBP;
Hyperactivity	1	36	1.63934	0.836702	0.710454	1	1	1	NBN;
Hyperammonemia	1	17	1.63934	1.77129	0.441307	1	1	1	MMAB;
Hypercalciuria	1	17	1.63934	1.77129	0.441307	1	1	1	HLA-DRB1;
Hyperexcitability	1	1	1.63934	29.8313	0.0335165	1	1	1	PPT1;
Hyperextensible joints	1	5	1.63934	6.0139	0.15688	1	1	1	LRP5;
HYPERFERRITINEMIA WITH OR WITHOUT CATARACT	1	1	1.63934	29.8313	0.0335165	1	1	1	FTL;
Hyperglobulinemia	1	1	1.63934	29.8313	0.0335165	1	1	1	HLA-DRB1;
Hyperglycinemia	1	8	1.63934	3.7615	0.239108	1	1	1	MMAB;
Hyperhidrosis (in some patients)	1	1	1.63934	29.8313	0.0335165	1	1	1	DSG1;
Hyperkeratosis at corners of mouth (in some patients)	1	1	1.63934	29.8313	0.0335165	1	1	1	DSG1;
Hyperkeratosis, focal, on the palms and soles (in adulthood in some)	2	3	3.27869	19.9206	0.00324488	1	0.982533	1	KRT5; KRT14;
Hyperkeratosis, marked	1	1	1.63934	29.8313	0.0335165	1	1	1	DSG1;
Hyperkeratosis of palms and soles	3	4	4.91803	22.3921	0.000140078	1	0.452537	1	KRT10; CTSC; KRT1;
Hyperkeratosis of pressure sites of palms and soles	1	1	1.63934	29.8313	0.0335165	1	1	1	DSG1;
Hyperkeratosis of skin at nipples and umbilicus	1	1	1.63934	29.8313	0.0335165	1	1	1	KRT1;
Hyperkeratosis of stratum corneum	2	2	3.27869	29.8313	0.00110555	1	0.452537	1	KRT10; KRT1;
Hyperkeratosis on dorsal surface of fingers and toes (knuckle pads, in some patients)	1	2	1.63934	14.9899	0.0659274	1	1	1	KRT1;
Hyperkeratotic dark-brown papules	1	1	1.63934	29.8313	0.0335165	1	1	1	KRT5;
Hyperkeratotic plaques on anterior knee area (in some patients)	1	1	1.63934	29.8313	0.0335165	1	1	1	DSG1;
Hyperkeratotic plaques on anterolateral ankle area (in some patients)	1	1	1.63934	29.8313	0.0335165	1	1	1	DSG1;
Hyperlordosis	1	8	1.63934	3.7615	0.239108	1	1	1	GALNS;
HYPEROSTOSIS CORTICALIS GENERALISATA, BENIGN FORM OF WORTH, WITH TORUS PALATINUS	1	1	1.63934	29.8313	0.0335165	1	1	1	LRP5;
Hyperreflexia	4	122	6.55738	0.980442	0.594405	1	1	1	FBXO7; NDUFAF3; KIAA0196; FTL;
Hyperreflexia (later)	1	1	1.63934	29.8313	0.0335165	1	1	1	ARSA;
Hypersensitivity to ionizing radiation	1	1	1.63934	29.8313	0.0335165	1	1	1	ATM;
Hypertelorism	3	121	4.91803	0.742024	0.784815	1	1	1	DHCR7; FUCA1; KIAA0196;
Hypertonia	1	21	1.63934	1.43406	0.51322	1	1	1	BCKDHB;
Hypertonia (childhood)	1	1	1.63934	29.8313	0.0335165	1	1	1	DHCR7;
Hypertrophic cardiomyopathy	2	45	3.27869	1.33217	0.449839	1	1	1	DES; NDUFAF3;
Hypertrophic clitoris	1	1	1.63934	29.8313	0.0335165	1	1	1	HCCS;
Hypertrophy of calves (in 3 of 6 patients)	1	1	1.63934	29.8313	0.0335165	1	1	1	SMN1;
Hypogammaglobulinemia	1	9	1.63934	3.34402	0.264723	1	1	1	ICOS;
Hypoglycemia	2	55	3.27869	1.09	0.557843	1	1	1	BCKDHB; NDUFAF3;
Hypogonadism	1	19	1.63934	1.58494	0.478482	1	1	1	ATM;
Hypohidrosis	1	5	1.63934	6.0139	0.15688	1	1	1	KRT14;
Hypohidrosis/hyperhidrosis	1	1	1.63934	29.8313	0.0335165	1	1	1	KRT14;
Hypoketotic hypoglycemia	1	2	1.63934	14.9899	0.0659274	1	1	1	CPT1A;
Hypomimia	2	2	3.27869	29.8313	0.00110555	1	0.452537	1	FBXO7; FTL;
Hypoplasia of malar eminences	1	1	1.63934	29.8313	0.0335165	1	1	1	EBP;
Hypoplastic left heart	1	3	1.63934	10.0099	0.0972687	1	1	1	KIAA0196;
Hypoplastic lungs	1	5	1.63934	6.0139	0.15688	1	1	1	DHCR7;
Hypoplastic nasal bridge	1	1	1.63934	29.8313	0.0335165	1	1	1	DHCR24;
Hypoplastic scrotum	1	7	1.63934	4.2981	0.212615	1	1	1	DHCR7;
Hypoplastic tongue	1	1	1.63934	29.8313	0.0335165	1	1	1	DHCR7;
Hypoplastic uterus	1	3	1.63934	10.0099	0.0972687	1	1	1	HCCS;
Hyporeflexia	2	75	3.27869	0.799373	0.727142	1	1	1	NDUFAF3; SMN1;
Hyporeflexia (early)	1	1	1.63934	29.8313	0.0335165	1	1	1	ARSA;
Hyporeflexia in lower limbs	1	1	1.63934	29.8313	0.0335165	1	1	1	DES;
Hypospadias	3	55	4.91803	1.63229	0.279452	1	1	1	HCCS; DHCR7; KIAA0196;
Hypotonia	11	233	18.0328	1.40957	0.147331	1	1	1	BCKDHB; MMAB; NDUFAF3; ARSA; CPT1A; GAA; LRP5; NPC2; KIAA0196; PPT1; HEXA;
Hypotonia changing to hypertonia	1	1	1.63934	29.8313	0.0335165	1	1	1	FUCA1;
Hypotonia (early infancy)	1	1	1.63934	29.8313	0.0335165	1	1	1	DHCR7;
Hz slow sharp waves seen on EEG	1	1	1.63934	29.8313	0.0335165	1	1	1	ASAH1;
Ichthyosis	1	11	1.63934	2.73657	0.313434	1	1	1	EBP;
ICHTHYOSIS, CYCLIC, WITH EPIDERMOLYTIC HYPERKERATOSIS	2	2	3.27869	29.8313	0.00110555	1	0.452537	1	KRT10; KRT1;
Ichthyosis hystrix	1	3	1.63934	10.0099	0.0972687	1	1	1	KRT1;
Ichthyosis of scalp and flexural areas	2	2	3.27869	29.8313	0.00110555	1	0.452537	1	KRT10; KRT1;
Idiopathic thrombocytopenia	1	1	1.63934	29.8313	0.0335165	1	1	1	ADA;
Immunoglobulin antibodies present	1	1	1.63934	29.8313	0.0335165	1	1	1	ATM;
Immunology	8	148	13.1148	1.61441	0.116565	1	1	1	ATM; HLA-DRB1; ADA; ICOS; NBN; DNASE1; FCGR2B; ELANE;
Impaired spermatogenesis	1	1	1.63934	29.8313	0.0335165	1	1	1	ATM;
Impaired sweating	1	1	1.63934	29.8313	0.0335165	1	1	1	HEXB;
Imperforate anus	1	16	1.63934	1.88193	0.421754	1	1	1	HCCS;
Impotence	1	5	1.63934	6.0139	0.15688	1	1	1	HEXB;
Improvement with age	2	3	3.27869	19.9206	0.00324488	1	0.982533	1	KRT5; KRT14;
Incidence 1 in 15,000-28,000 births	1	1	1.63934	29.8313	0.0335165	1	1	1	RB1;
Incidence 1 in 6,000 to 1 in 8,000 live births	1	1	1.63934	29.8313	0.0335165	1	1	1	SMN1;
Incidence of 1 in 20,000 live births	1	1	1.63934	29.8313	0.0335165	1	1	1	CSTB;
Incidence of 1 in 320,000 births among non-Jewish persons	1	1	1.63934	29.8313	0.0335165	1	1	1	HEXA;
Incidence of 1 in 3,900 births among Jewish persons	1	1	1.63934	29.8313	0.0335165	1	1	1	HEXA;
Incidence of 1 in 40,000 infants worldwide	1	1	1.63934	29.8313	0.0335165	1	1	1	GAA;
Incomplete bladder emptying	1	4	1.63934	7.51363	0.127575	1	1	1	HLA-DRB1;
Incomplete lobulation of the lungs	1	1	1.63934	29.8313	0.0335165	1	1	1	DHCR7;
Incontinence	1	9	1.63934	3.34402	0.264723	1	1	1	HLA-DRB1;
Incoordination	1	7	1.63934	4.2981	0.212615	1	1	1	HLA-DRB1;
Increased absolute neutrophil count (ANC) within 0.0-0.2 x 10(9)/l	1	1	1.63934	29.8313	0.0335165	1	1	1	ELANE;
Increased calvarial density	1	1	1.63934	29.8313	0.0335165	1	1	1	LRP5;
Increased calvarial thickness	1	1	1.63934	29.8313	0.0335165	1	1	1	LRP5;
Increased chromosome breakage	1	1	1.63934	29.8313	0.0335165	1	1	1	POLA1;
Increased CSF immunoglobulin levels	1	3	1.63934	10.0099	0.0972687	1	1	1	HLA-DRB1;
Increased CSF lactate	1	39	1.63934	0.772357	0.739167	1	1	1	NDUFAF3;
Increased CSF protein	1	8	1.63934	3.7615	0.239108	1	1	1	ARSA;
Increased gonial angle (AD osteosclerosis)	1	1	1.63934	29.8313	0.0335165	1	1	1	LRP5;
Increased IgE levels	1	2	1.63934	14.9899	0.0659274	1	1	1	ADA;
Increased incidence in retinoblastoma cases	1	3	1.63934	10.0099	0.0972687	1	1	1	RB1;
Increased levels of alpha fetoprotein	1	1	1.63934	29.8313	0.0335165	1	1	1	ATM;
Increased levels of carcinoembryonic antigen	1	1	1.63934	29.8313	0.0335165	1	1	1	ATM;
Increased levels of T cells bearing gamma/delta antigen receptor	1	1	1.63934	29.8313	0.0335165	1	1	1	ATM;
Increased mandibular bone density	1	1	1.63934	29.8313	0.0335165	1	1	1	LRP5;
Increased promyelocytes	1	1	1.63934	29.8313	0.0335165	1	1	1	ELANE;
Increased risk in heterozygotes	1	1	1.63934	29.8313	0.0335165	1	1	1	ATM;
Increased spinal bone density Z(BMD)	1	1	1.63934	29.8313	0.0335165	1	1	1	LRP5;
Increased startle response	1	2	1.63934	14.9899	0.0659274	1	1	1	HEXA;
Increased urinary sulfatide excretion	1	1	1.63934	29.8313	0.0335165	1	1	1	ARSA;
Increased urine oligosaccharides	1	1	1.63934	29.8313	0.0335165	1	1	1	FUCA1;
Increase in blood monocytes (2-3 times normal)	1	1	1.63934	29.8313	0.0335165	1	1	1	ELANE;
Individuals develop ability to stand and walk	1	2	1.63934	14.9899	0.0659274	1	1	1	SMN1;
Infant death may occur secondary to sepsis	2	2	3.27869	29.8313	0.00110555	1	0.452537	1	KRT5; KRT14;
Infantile, late-infantile, juvenile, and adult onset have been reported	1	1	1.63934	29.8313	0.0335165	1	1	1	PPT1;
Infantile muscle weakness	1	1	1.63934	29.8313	0.0335165	1	1	1	HEXB;
Infantile onset	1	1	1.63934	29.8313	0.0335165	1	1	1	HEXA;
Infantile seizures	1	1	1.63934	29.8313	0.0335165	1	1	1	HCCS;
Inguinal hernia	1	44	1.63934	0.684609	0.780922	1	1	1	GALNS;
In inbred Old Order Mennonite population of Lancaster County, MSUD prevalence is 1/176 newborns	1	3	1.63934	10.0099	0.0972687	1	1	1	BCKDHB;
Insidious onset	1	11	1.63934	2.73657	0.313434	1	1	1	KIAA0196;
Intermediate	1	3	1.63934	10.0099	0.0972687	1	1	1	BCKDHB;
Intermittent	1	3	1.63934	10.0099	0.0972687	1	1	1	BCKDHB;
Intermittent wheelchair dependence (stage 3)	1	1	1.63934	29.8313	0.0335165	1	1	1	CSTB;
Internal Genitalia (Female)	2	96	3.27869	0.624529	0.84347	1	1	1	ATM; HCCS;
Internal Genitalia (Male)	2	148	3.27869	0.405114	0.965876	1	1	1	ATM; DHCR7;
Intraepidermal vesicles	2	2	3.27869	29.8313	0.00110555	1	0.452537	1	KRT10; KRT1;
Intraocular calcification	1	1	1.63934	29.8313	0.0335165	1	1	1	LRP5;
Intrasarcoplasmic dense granulofilamentous aggregates that are immunoreactive with desmin	1	1	1.63934	29.8313	0.0335165	1	1	1	DES;
Intrauterine growth retardation	1	39	1.63934	0.772357	0.739167	1	1	1	KIAA0196;
In untreated patients - elevated blood galactose urine reducing substances (galactosuria), hyperchloremic metabolic acidosis, aminoaciduria, elevated liver enzymes, albuminuria	1	1	1.63934	29.8313	0.0335165	1	1	1	GALT;
Involuntary movements, asymmetric	1	1	1.63934	29.8313	0.0335165	1	1	1	FTL;
Iridocyclitis	1	1	1.63934	29.8313	0.0335165	1	1	1	HLA-DRB1;
Iris atrophy	1	1	1.63934	29.8313	0.0335165	1	1	1	LRP5;
Iris coloboma	1	13	1.63934	2.31588	0.358968	1	1	1	HCCS;
Iris crypts and clefts underdeveloped	1	1	1.63934	29.8313	0.0335165	1	1	1	ADAMTSL4;
Irritability	2	34	3.27869	1.76304	0.316635	1	1	1	ASAH1; PPT1;
Isolated cases	1	49	1.63934	0.614765	0.816085	1	1	1	HLA-DRB1;
Jaundice	2	28	3.27869	2.1407	0.240907	1	1	1	KRT18; KRT8;
Joint contracture	1	1	1.63934	29.8313	0.0335165	1	1	1	FUCA1;
Joint laxity	1	36	1.63934	0.836702	0.710454	1	1	1	GALNS;
Joints	1	23	1.63934	1.30942	0.545681	1	1	1	HLA-DRB1;
Juvenile onset 4 years to puberty	1	1	1.63934	29.8313	0.0335165	1	1	1	ARSA;
Keratan sulfate excretion in urine that decreases with age	1	2	1.63934	14.9899	0.0659274	1	1	1	GALNS;
Keratin clumping in suprabasal epidermal layers	2	2	3.27869	29.8313	0.00110555	1	0.452537	1	KRT10; KRT1;
Keratosis palmaris	1	2	1.63934	14.9899	0.0659274	1	1	1	KRT1;
Keratosis plantaris	1	2	1.63934	14.9899	0.0659274	1	1	1	KRT1;
Ketonuria	1	3	1.63934	10.0099	0.0972687	1	1	1	MMAB;
Ketosis	2	7	3.27869	8.55364	0.0208222	1	1	1	BCKDHB; MMAB;
Kidney malformation	1	3	1.63934	10.0099	0.0972687	1	1	1	FANCD2;
Kidneys	7	276	11.4754	0.757645	0.841502	1	1	1	EBP; ADA; DHCR7; NBN; DNASE1; FCGR2B; KIAA0196;
Kyphoscoliosis	1	34	1.63934	0.885906	0.689608	1	1	1	LRP5;
Kyphosis	1	56	1.63934	0.537933	0.856161	1	1	1	GALNS;
Lab	11	266	18.0328	1.2347	0.270688	1	1	1	FANCD2; POLA1; RB1; KRT18; ALB; KRT8; KRT4; HEXB; CTSA; KRT1; CA2;
Laboratory Abnormalities	26	712	42.623	1.08975	0.328679	1	1	1	ATM; BCKDHB; DHCR24; EBP; GALT; HCCS; HLA-DRB1; MMAB; NDUFAF3; ADA; ARSA; CPT1A; GAA; DHCR7; ICOS; NBN; DNASE1; LRP5; FCGR2B; FUCA1; NPC2; ASAH1; PPT1; HEXA; FTL; GALNS;
Lack of scarring	2	2	3.27869	29.8313	0.00110555	1	0.452537	1	KRT5; KRT14;
Lactic acidemia	1	22	1.63934	1.36891	0.529726	1	1	1	NDUFAF3;
Lactic acidosis	1	58	1.63934	0.519387	0.86594	1	1	1	NDUFAF3;
Lactic acidosis in E3-deficiency	1	3	1.63934	10.0099	0.0972687	1	1	1	BCKDHB;
Large central front teeth	1	1	1.63934	29.8313	0.0335165	1	1	1	DHCR7;
Large dysplastic ears	1	2	1.63934	14.9899	0.0659274	1	1	1	NBN;
Large irregularly shaped keratohyalin granules	1	2	1.63934	14.9899	0.0659274	1	1	1	KRT1;
Large tongue	1	1	1.63934	29.8313	0.0335165	1	1	1	FUCA1;
Laryngeal dystonia	1	2	1.63934	14.9899	0.0659274	1	1	1	FTL;
Laryngeal nodules	1	1	1.63934	29.8313	0.0335165	1	1	1	ASAH1;
Larynx	2	46	3.27869	1.30322	0.461284	1	1	1	ASAH1; FTL;
Late hypertonia	1	1	1.63934	29.8313	0.0335165	1	1	1	HEXA;
Late infantile onset 6-24 months	1	1	1.63934	29.8313	0.0335165	1	1	1	ARSA;
Late onset combined immunodeficiency with allelic variant	1	1	1.63934	29.8313	0.0335165	1	1	1	ADA;
Leigh syndrome (	1	20	1.63934	1.50573	0.496145	1	1	1	NDUFAF3;
Lethal usually by age 3 years	1	1	1.63934	29.8313	0.0335165	1	1	1	HEXB;
Lethargy	6	64	9.83607	2.80091	0.0181775	1	1	1	BCKDHB; MMAB; NDUFAF3; CPT1A; KRT18; KRT8;
Leukemia	2	8	3.27869	7.48577	0.0271695	1	1	1	ATM; RB1;
Leukocoria	1	3	1.63934	10.0099	0.0972687	1	1	1	RB1;
Leukodystrophy	1	19	1.63934	1.58494	0.478482	1	1	1	NDUFAF3;
Leukopenia	2	15	3.27869	3.99474	0.0877175	1	1	1	DNASE1; FCGR2B;
Life-threatening metabolic decompensation	1	3	1.63934	10.0099	0.0972687	1	1	1	BCKDHB;
Limb fasciculation	1	2	1.63934	14.9899	0.0659274	1	1	1	SMN1;
Limbs	13	339	21.3115	1.14482	0.34155	1	1	1	DES; DHCR24; EBP; HLA-DRB1; ADA; DHCR7; DNASE1; LRP5; FCGR2B; FUCA1; CA2; PPT1; GALNS;
Limb shortening	1	1	1.63934	29.8313	0.0335165	1	1	1	DHCR7;
Lipogranulomatosis	1	1	1.63934	29.8313	0.0335165	1	1	1	ASAH1;
Liver	12	256	19.6721	1.39945	0.138006	1	1	1	GALT; HLA-DRB1; MMAB; NDUFAF3; ADA; CPT1A; GAA; ICOS; FUCA1; NPC2; ASAH1; GALNS;
Liver histopathology shows severe panlobular liver-cell swelling with Mallory body formation, prominent pericellular fibrosis, 'micro-micronodular' cirrhosis, and marked deposits of copper and copper-binding protein	2	2	3.27869	29.8313	0.00110555	1	0.452537	1	KRT18; KRT8;
Localized epidermolytic hyperkeratosis	1	2	1.63934	14.9899	0.0659274	1	1	1	KRT1;
Long bone deformities	1	1	1.63934	29.8313	0.0335165	1	1	1	LRP5;
Longitudinal hyperkeratotic lesions along flexor surface of each finger, extending to palm	1	1	1.63934	29.8313	0.0335165	1	1	1	DSG1;
Long nose (beaked or upturned)	1	1	1.63934	29.8313	0.0335165	1	1	1	NBN;
Loss of diploe	1	1	1.63934	29.8313	0.0335165	1	1	1	LRP5;
Loss of independent ambulation	1	1	1.63934	29.8313	0.0335165	1	1	1	ASAH1;
Loss of lower alpha-motor neurons in the anterior horn of the spinal cord and lower brainstem	1	1	1.63934	29.8313	0.0335165	1	1	1	SMN1;
Loss of speech	3	7	4.91803	12.8092	0.00113995	1	0.458135	1	ARSA; NPC2; PPT1;
Low B cell count	1	1	1.63934	29.8313	0.0335165	1	1	1	NBN;
Low birth weight	1	25	1.63934	1.2047	0.57601	1	1	1	FANCD2;
Low CD4+/CD8+ ratio	1	1	1.63934	29.8313	0.0335165	1	1	1	NBN;
Low CD4+ count	1	1	1.63934	29.8313	0.0335165	1	1	1	NBN;
Low cholesterol	1	1	1.63934	29.8313	0.0335165	1	1	1	DHCR7;
Low cholesterol esterification rates	1	2	1.63934	14.9899	0.0659274	1	1	1	NPC2;
Lower limb spasticity	1	17	1.63934	1.77129	0.441307	1	1	1	KIAA0196;
Lower limb weakness	1	16	1.63934	1.88193	0.421754	1	1	1	KIAA0196;
Low or absent IgA levels	1	1	1.63934	29.8313	0.0335165	1	1	1	ADA;
Low or absent IgM levels	1	1	1.63934	29.8313	0.0335165	1	1	1	ADA;
Low posterior hairline	1	13	1.63934	2.31588	0.358968	1	1	1	KIAA0196;
Low-set ears	3	97	4.91803	0.925599	0.641963	1	1	1	DHCR24; DHCR7; KIAA0196;
Low T cell count	1	1	1.63934	29.8313	0.0335165	1	1	1	NBN;
Lumbar hyperlordosis	1	7	1.63934	4.2981	0.212615	1	1	1	FUCA1;
Lung	10	171	16.3934	1.74617	0.054023	1	1	1	HLA-DRB1; ADA; DHCR7; ICOS; NBN; DNASE1; FCGR2B; F13A1; NPC2; GALNS;
Lymphadenopathy	1	13	1.63934	2.31588	0.358968	1	1	1	ICOS;
Lymphoblastic leukemia with mediastinal mass	1	1	1.63934	29.8313	0.0335165	1	1	1	POLA1;
Lymphocytopenia	1	1	1.63934	29.8313	0.0335165	1	1	1	ATM;
Lymphoma	2	9	3.27869	6.65494	0.0341873	1	1	1	RB1; NBN;
Lymphopenia	1	6	1.63934	5.01325	0.185216	1	1	1	ADA;
Macrocephaly	1	60	1.63934	0.502077	0.875064	1	1	1	HEXB;
Macrocephaly, progressive	1	18	1.63934	1.67294	0.460209	1	1	1	NDUFAF3;
Macrocephaly, relative	1	4	1.63934	7.51363	0.127575	1	1	1	DHCR24;
Macroglossia	2	18	3.27869	3.32932	0.119973	1	1	1	GAA; HEXB;
Macular cherry-red spots (in some patients)	1	1	1.63934	29.8313	0.0335165	1	1	1	ASAH1;
Macular degeneration	1	10	1.63934	3.00996	0.289489	1	1	1	PPT1;
Macular ectopia	1	2	1.63934	14.9899	0.0659274	1	1	1	LRP5;
Macular pallor with prominence of fovea centralis (cherry red spot)	1	1	1.63934	29.8313	0.0335165	1	1	1	HEXA;
Majority of patients from Italy and Southwestern United States	1	1	1.63934	29.8313	0.0335165	1	1	1	FUCA1;
Male predominance	1	1	1.63934	29.8313	0.0335165	1	1	1	DSG1;
Males are more severely affected	1	2	1.63934	14.9899	0.0659274	1	1	1	PDK3;
Malocclusion	1	15	1.63934	2.00731	0.401529	1	1	1	LRP5;
Malrotation	1	3	1.63934	10.0099	0.0972687	1	1	1	DHCR7;
Maple syrup urine odor	1	3	1.63934	10.0099	0.0972687	1	1	1	BCKDHB;
Markedly reduced IgA levels	1	2	1.63934	14.9899	0.0659274	1	1	1	ICOS;
Markedly reduced IgG levels	1	2	1.63934	14.9899	0.0659274	1	1	1	ICOS;
Mastoiditis	1	3	1.63934	10.0099	0.0972687	1	1	1	NBN;
Maternal	1	10	1.63934	3.00996	0.289489	1	1	1	CPT1A;
Maturation arrest of neutrophil precursors seen on bone marrow biopsy	1	1	1.63934	29.8313	0.0335165	1	1	1	ELANE;
May have seasonal variance in severity	1	1	1.63934	29.8313	0.0335165	1	1	1	KRT5;
Mean age at onset 35 years (range 20-60)	1	1	1.63934	29.8313	0.0335165	1	1	1	SMN1;
Medulloblastoma	1	11	1.63934	2.73657	0.313434	1	1	1	NBN;
Mental deterioration	2	14	3.27869	4.27987	0.0776525	1	1	1	ARSA; NPC2;
Mental retardation	6	200	9.83607	0.896387	0.677547	1	1	1	FANCD2; POLA1; DHCR7; FUCA1; CTSA; PPT1;
Mental retardation by the age of 7 years	1	1	1.63934	29.8313	0.0335165	1	1	1	NBN;
Mental retardation if untreated	2	5	3.27869	11.9683	0.0103549	1	1	1	BCKDHB; GALT;
Mental retardation (in some patients)	1	12	1.63934	2.50871	0.336586	1	1	1	ASAH1;
Mental retardation, mild	1	11	1.63934	2.73657	0.313434	1	1	1	LRP5;
Mesangial sclerosis	1	1	1.63934	29.8313	0.0335165	1	1	1	ADA;
Metabolic acidosis	1	30	1.63934	1.00399	0.64339	1	1	1	MMAB;
Metabolic Features	6	195	9.83607	0.91937	0.652452	1	1	1	BCKDHB; HLA-DRB1; MMAB; NDUFAF3; CPT1A; GAA;
Metacarpal diaphyseal endosteal sclerosis	1	1	1.63934	29.8313	0.0335165	1	1	1	LRP5;
Metachromatic deposits (sulfatide-containing) in central and peripheral nervous systems and visceral organs	1	1	1.63934	29.8313	0.0335165	1	1	1	ARSA;
METACHROMATIC LEUKODYSTROPHY	1	1	1.63934	29.8313	0.0335165	1	1	1	ARSA;
Metatarsal diaphyseal endosteal sclerosis	1	1	1.63934	29.8313	0.0335165	1	1	1	LRP5;
Metatarsus adductus	1	7	1.63934	4.2981	0.212615	1	1	1	DHCR7;
Methylmalonic acidemia	1	6	1.63934	5.01325	0.185216	1	1	1	MMAB;
Methylmalonic aciduria	1	8	1.63934	3.7615	0.239108	1	1	1	MMAB;
METHYLMALONIC ACIDURIA, cblB TYPE	1	1	1.63934	29.8313	0.0335165	1	1	1	MMAB;
Microcephaly	6	129	9.83607	1.38971	0.260748	1	1	1	DHCR24; FANCD2; HCCS; DHCR7; NBN; LRP5;
Microcephaly, postnatal, progressive	1	1	1.63934	29.8313	0.0335165	1	1	1	PPT1;
Micrognathia	4	121	6.55738	0.988544	0.587675	1	1	1	DHCR24; DHCR7; NBN; KIAA0196;
Micrographia	1	6	1.63934	5.01325	0.185216	1	1	1	FTL;
Micropenis	1	21	1.63934	1.43406	0.51322	1	1	1	DHCR7;
Microphthalmia	2	37	3.27869	1.62013	0.354041	1	1	1	HCCS; LRP5;
Microphthalmos	1	3	1.63934	10.0099	0.0972687	1	1	1	EBP;
Microurethra	1	1	1.63934	29.8313	0.0335165	1	1	1	DHCR7;
Migratory plaques of thickened, sharply demarcated erythema and hyperkeratosis	2	2	3.27869	29.8313	0.00110555	1	0.452537	1	KRT10; KRT1;
Mild clavicular sclerosis	1	1	1.63934	29.8313	0.0335165	1	1	1	LRP5;
Mild hepatomegaly	1	6	1.63934	5.01325	0.185216	1	1	1	GALNS;
Mildly coarse facial features	1	2	1.63934	14.9899	0.0659274	1	1	1	GALNS;
Mild mental deterioration	1	1	1.63934	29.8313	0.0335165	1	1	1	CSTB;
Mild-moderate mental retardation	1	1	1.63934	29.8313	0.0335165	1	1	1	EBP;
Mild rib sclerosis	1	1	1.63934	29.8313	0.0335165	1	1	1	LRP5;
Mild sclerosis	1	1	1.63934	29.8313	0.0335165	1	1	1	LRP5;
Mild to moderate growth deficiency	1	1	1.63934	29.8313	0.0335165	1	1	1	EBP;
Mild to moderate hyperammonemia	1	1	1.63934	29.8313	0.0335165	1	1	1	CPT1A;
Mild to moderately reduced T cell count	1	1	1.63934	29.8313	0.0335165	1	1	1	NBN;
Mild to severe mental retardation (24%)	1	1	1.63934	29.8313	0.0335165	1	1	1	HCCS;
Mild vertebral body sclerosis	1	1	1.63934	29.8313	0.0335165	1	1	1	LRP5;
Milia	2	11	3.27869	5.44605	0.050035	1	1	1	KRT5; KRT14;
Milia (less common)	2	2	3.27869	29.8313	0.00110555	1	0.452537	1	KRT5; KRT14;
Milia (rare)	2	3	3.27869	19.9206	0.00324488	1	0.982533	1	KRT5; KRT14;
Minor motor impairment (stage 2)	1	1	1.63934	29.8313	0.0335165	1	1	1	CSTB;
Misc	8	219	13.1148	1.09104	0.455545	1	1	1	ETV6; RB1; KRT18; KRT8; KRT4; ELANE; HEXB; CA2;
Miscellaneous	42	1228	68.8525	1.02052	0.468213	1	1	1	ATM; BCKDHB; DES; DHCR24; EBP; FBXO7; GALT; HCCS; HLA-DRB1; MMAB; NDUFAF3; PDK3; RB1; SMN1; ADA; ARSA; CPT1A; DSG1; GAA; DHCR7; ICOS; NBN; TGFB3; DNASE1; LRP5; FCGR2B; KRT5; ADAMTSL4; F13A1; FUCA1; ELANE; KRT14; NPC2; CTSC; KIAA0196; ASAH1; PPT1; IL1B; HEXA; CSTB; FTL; GALNS;
Mitochondrial	1	37	1.63934	0.814095	0.720355	1	1	1	NDUFAF3;
MITOCHONDRIAL COMPLEX I DEFICIENCY	1	18	1.63934	1.67294	0.460209	1	1	1	NDUFAF3;
Mitral valvular disease	1	1	1.63934	29.8313	0.0335165	1	1	1	CTSA;
Monomeric IgM	1	1	1.63934	29.8313	0.0335165	1	1	1	ATM;
Mononuclear cell noncaseating granulomatous inflammation on biopsy (lung, skin, lip)	1	1	1.63934	29.8313	0.0335165	1	1	1	HLA-DRB1;
Monotone speech	1	1	1.63934	29.8313	0.0335165	1	1	1	FBXO7;
Motor retardation	1	4	1.63934	7.51363	0.127575	1	1	1	ASAH1;
Mottled' pigmentation of the trunk and proximal extremities	1	1	1.63934	29.8313	0.0335165	1	1	1	KRT5;
Mouth	19	417	31.1475	1.3599	0.0835685	1	1	1	DHCR24; HLA-DRB1; RB1; DSG1; GAA; DHCR7; NBN; LRP5; KRT5; KRT4; FUCA1; ELANE; KRT14; CTSC; KIAA0196; ASAH1; IL1B; FTL; GALNS;
Movement	2	29	3.27869	2.06691	0.253527	1	1	1	SMN1; DHCR7;
MRI imaging shows cavitation of the basal ganglia	1	1	1.63934	29.8313	0.0335165	1	1	1	FTL;
MRI shows high signal intensity of the white matter later	1	1	1.63934	29.8313	0.0335165	1	1	1	PPT1;
MRI shows hypointensity of the thalami early-on	1	1	1.63934	29.8313	0.0335165	1	1	1	PPT1;
Mucosal ulcers	1	1	1.63934	29.8313	0.0335165	1	1	1	ELANE;
Multifactorial	1	31	1.63934	0.971611	0.655542	1	1	1	HLA-DRB1;
Multiple chromosomal breaks	1	3	1.63934	10.0099	0.0972687	1	1	1	FANCD2;
Multiple, small punctate keratoses (palms and soles)	1	1	1.63934	29.8313	0.0335165	1	1	1	KRT14;
Muscle	2	15	3.27869	3.99474	0.0877175	1	1	1	DES; HEXB;
Muscle atrophy	3	39	4.91803	2.30178	0.139911	1	1	1	NDUFAF3; SMN1; ASAH1;
Muscle atrophy, proximal	1	2	1.63934	14.9899	0.0659274	1	1	1	SMN1;
Muscle biopsy showed neurogenic atrophy	1	1	1.63934	29.8313	0.0335165	1	1	1	ASAH1;
Muscle biopsy shows abnormal mitochondria	1	18	1.63934	1.67294	0.460209	1	1	1	NDUFAF3;
Muscle cramps	1	17	1.63934	1.77129	0.441307	1	1	1	SMN1;
Muscle, Soft Tissue	7	341	11.4754	0.61323	0.957157	1	1	1	DES; NDUFAF3; SMN1; CPT1A; GAA; KIAA0196; ASAH1;
Muscle weakness	2	62	3.27869	0.966957	0.624264	1	1	1	NDUFAF3; ARSA;
Muscle weakness is not a feature	1	1	1.63934	29.8313	0.0335165	1	1	1	CPT1A;
Muscle weakness, proximal	1	3	1.63934	10.0099	0.0972687	1	1	1	ASAH1;
Muscle weakness, proximal, symmetric (lower limbs more affected than upper limbs) due to motor neuronopathy	1	1	1.63934	29.8313	0.0335165	1	1	1	SMN1;
Muscle weakness, symmetric, proximal (lower limbs more affected than upper limbs) due to motor neuronopathy	1	2	1.63934	14.9899	0.0659274	1	1	1	SMN1;
Mutism	1	9	1.63934	3.34402	0.264723	1	1	1	FTL;
Myelin basic protein in CSF	1	3	1.63934	10.0099	0.0972687	1	1	1	HLA-DRB1;
Myoclonic epilepsy	1	19	1.63934	1.58494	0.478482	1	1	1	NDUFAF3;
MYOCLONIC EPILEPSY OF UNVERRICHT AND LUNDBORG	1	1	1.63934	29.8313	0.0335165	1	1	1	CSTB;
Myoclonic seizures	1	12	1.63934	2.50871	0.336586	1	1	1	ASAH1;
Myoclonus	2	31	3.27869	1.9336	0.278811	1	1	1	ATM; PPT1;
Myopathic pattern on EMG	1	1	1.63934	29.8313	0.0335165	1	1	1	GAA;
N-acetylgalactosamine-6-sulfatase deficiency in fibroblasts and leukocytes	1	1	1.63934	29.8313	0.0335165	1	1	1	GALNS;
NAEGELI SYNDROME	1	1	1.63934	29.8313	0.0335165	1	1	1	KRT14;
Nail dystrophy, mild (in some patients)	1	1	1.63934	29.8313	0.0335165	1	1	1	DSG1;
Nails	6	123	9.83607	1.45749	0.22653	1	1	1	DSG1; KRT5; KRT10; KRT14; CTSC; KRT1;
Nail shedding	2	2	3.27869	29.8313	0.00110555	1	0.452537	1	KRT5; KRT14;
Narrow diaphyses	1	1	1.63934	29.8313	0.0335165	1	1	1	LRP5;
Nasopharynx	2	34	3.27869	1.76304	0.316635	1	1	1	NBN; GALNS;
NAXOS DISEASE	1	1	1.63934	29.8313	0.0335165	1	1	1	JUP;
Neck	1	130	1.63934	0.231749	0.989946	1	1	1	EBP;
Neck muscle weakness	1	7	1.63934	4.2981	0.212615	1	1	1	DES;
Neonatal blisters and erosions	2	2	3.27869	29.8313	0.00110555	1	0.452537	1	KRT10; KRT1;
Neonatal jaundice	1	4	1.63934	7.51363	0.127575	1	1	1	NPC2;
Neonatal onset	1	4	1.63934	7.51363	0.127575	1	1	1	MMAB;
Neoplasia	5	151	8.19672	0.989703	0.581163	1	1	1	ATM; RB1; ADA; NBN; IL1B;
Neovascularization	1	1	1.63934	29.8313	0.0335165	1	1	1	LRP5;
Nephritis	2	8	3.27869	7.48577	0.0271695	1	1	1	DNASE1; FCGR2B;
Neuro	9	132	14.7541	2.03606	0.0287336	1	1	1	DES; FANCD2; HLA-DRB1; POLA1; KRT18; KRT8; HEXB; CTSA; CA2;
Neuroaxonal spheroids	1	1	1.63934	29.8313	0.0335165	1	1	1	FTL;
Neurodegeneration	1	6	1.63934	5.01325	0.185216	1	1	1	NBN;
Neurofibrillary tangles	1	3	1.63934	10.0099	0.0972687	1	1	1	NPC2;
Neurogenic scapuloperoneal syndrome	1	1	1.63934	29.8313	0.0335165	1	1	1	DES;
Neurologic	31	930	50.8197	0.994688	0.569576	1	1	1	ATM; BCKDHB; DHCR24; EBP; FBXO7; GALT; HCCS; HLA-DRB1; MMAB; NDUFAF3; PDK3; SMN1; ARSA; CPT1A; GAA; DHCR7; NBN; DNASE1; LRP5; FCGR2B; F13A1; FUCA1; NPC2; CTSC; KIAA0196; ASAH1; PPT1; HEXA; CSTB; FTL; GALNS;
Neurologic involvement may occur in the absence of visceral involvement	1	1	1.63934	29.8313	0.0335165	1	1	1	NPC2;
Neuropathic process seen on muscle biopsy	1	2	1.63934	14.9899	0.0659274	1	1	1	SMN1;
Neurosarcoidosis (5-16% of patients)	1	1	1.63934	29.8313	0.0335165	1	1	1	HLA-DRB1;
Neutropenia	1	20	1.63934	1.50573	0.496145	1	1	1	MMAB;
NIJMEGEN BREAKAGE SYNDROME	1	1	1.63934	29.8313	0.0335165	1	1	1	NBN;
No abnormal keratohyalin granules	1	1	1.63934	29.8313	0.0335165	1	1	1	KRT1;
No aggregated tonofilaments	1	1	1.63934	29.8313	0.0335165	1	1	1	KRT1;
No clumping of keratin filaments in basal epidermal cells	2	2	3.27869	29.8313	0.00110555	1	0.452537	1	KRT5; KRT14;
No conjunctival involvement	1	1	1.63934	29.8313	0.0335165	1	1	1	KRT4;
No cytolysis	1	1	1.63934	29.8313	0.0335165	1	1	1	KRT1;
No dicarboxylic aciduria	1	2	1.63934	14.9899	0.0659274	1	1	1	CPT1A;
Nodule show lipid-laden macrophages	1	1	1.63934	29.8313	0.0335165	1	1	1	ASAH1;
No endobones	1	1	1.63934	29.8313	0.0335165	1	1	1	LRP5;
No increased fracture rate	1	1	1.63934	29.8313	0.0335165	1	1	1	LRP5;
No ketonuria	1	1	1.63934	29.8313	0.0335165	1	1	1	CPT1A;
No large keratohyalin granules	1	1	1.63934	29.8313	0.0335165	1	1	1	KRT1;
Noncicatricial alopecia (scalp, eyebrows, axillary hair)	1	1	1.63934	29.8313	0.0335165	1	1	1	KRT14;
Non-Hodgkin lymphoma	1	1	1.63934	29.8313	0.0335165	1	1	1	ATM;
Nonprogressive corneal dystrophy	1	2	1.63934	14.9899	0.0659274	1	1	1	KRT3;
Nonscarring blisters (hand, feet, forearms)	1	1	1.63934	29.8313	0.0335165	1	1	1	KRT14;
No palmoplantar keratosis	1	1	1.63934	29.8313	0.0335165	1	1	1	CTSC;
Normal	2	4	3.27869	14.9529	0.00634969	1	1	1	KRT10; KRT1;
Normal alkaline phosphatase	1	1	1.63934	29.8313	0.0335165	1	1	1	LRP5;
Normal alpha fetoprotein	1	1	1.63934	29.8313	0.0335165	1	1	1	NBN;
Normal early psychomotor development	1	1	1.63934	29.8313	0.0335165	1	1	1	ASAH1;
Normal head circumference	1	3	1.63934	10.0099	0.0972687	1	1	1	FUCA1;
Normal height	1	5	1.63934	6.0139	0.15688	1	1	1	LRP5;
Normal intelligence	1	45	1.63934	0.669399	0.788447	1	1	1	GALNS;
Normal intelligence in most cases	1	1	1.63934	29.8313	0.0335165	1	1	1	LRP5;
Normal IQ in infancy, then IQ drops with age	1	1	1.63934	29.8313	0.0335165	1	1	1	NBN;
Normal keratin intermediate filaments	1	1	1.63934	29.8313	0.0335165	1	1	1	DSG1;
Normal motor conduction studies (initially)	1	1	1.63934	29.8313	0.0335165	1	1	1	SMN1;
Normal numbers of B cells	1	1	1.63934	29.8313	0.0335165	1	1	1	ATM;
Normal numbers of T cells	1	2	1.63934	14.9899	0.0659274	1	1	1	ICOS;
Normal or mildly reduced sphingomyelinase activity	1	2	1.63934	14.9899	0.0659274	1	1	1	NPC2;
Normal or reduced numbers of B cells	1	1	1.63934	29.8313	0.0335165	1	1	1	ICOS;
Normal red cell counts	1	1	1.63934	29.8313	0.0335165	1	1	1	FTL;
Normal serum acid phosphatase	1	1	1.63934	29.8313	0.0335165	1	1	1	LRP5;
Normal serum cobalamin (vitamin B12)	1	2	1.63934	14.9899	0.0659274	1	1	1	MMAB;
Normal serum creatine kinase	1	3	1.63934	10.0099	0.0972687	1	1	1	ASAH1;
Normal serum iron	1	1	1.63934	29.8313	0.0335165	1	1	1	FTL;
Normal to elevated total plasma carnitine	1	1	1.63934	29.8313	0.0335165	1	1	1	CPT1A;
Normal transferrin saturation	1	1	1.63934	29.8313	0.0335165	1	1	1	FTL;
No 'rugger-jersey spine'	1	1	1.63934	29.8313	0.0335165	1	1	1	LRP5;
Nose	6	314	9.83607	0.570957	0.966177	1	1	1	DHCR24; EBP; DHCR7; NBN; FUCA1; KIAA0196;
Nystagmus	3	122	4.91803	0.735942	0.789615	1	1	1	DHCR24; EBP; NDUFAF3;
Oculomotor abnormalities	1	1	1.63934	29.8313	0.0335165	1	1	1	ATM;
Odontoid hypoplasia	1	13	1.63934	2.31588	0.358968	1	1	1	GALNS;
Oligoclonal bands in CSF	1	3	1.63934	10.0099	0.0972687	1	1	1	HLA-DRB1;
Oncocytic cardiomyopathy	1	1	1.63934	29.8313	0.0335165	1	1	1	HCCS;
Oncology	4	80	6.55738	1.49511	0.278739	1	1	1	CD82; POLA1; RB1; PTPRJ;
One family has been reported (last curated August 2013)	1	1	1.63934	29.8313	0.0335165	1	1	1	PDK3;
Onset	1	1	1.63934	29.8313	0.0335165	1	1	1	CPT1A;
Onset 13 to 63 years of age	1	1	1.63934	29.8313	0.0335165	1	1	1	FTL;
Onset 20-55 years of age	1	3	1.63934	10.0099	0.0972687	1	1	1	HLA-DRB1;
Onset 6-13 years	1	1	1.63934	29.8313	0.0335165	1	1	1	CSTB;
Onset after puberty	1	1	1.63934	29.8313	0.0335165	1	1	1	KRT5;
Onset at birth	1	27	1.63934	1.1155	0.604345	1	1	1	EBP;
Onset at birth or early childhood	2	3	3.27869	19.9206	0.00324488	1	0.982533	1	KRT5; KRT14;
Onset at birth or in early infancy	2	5	3.27869	11.9683	0.0103549	1	1	1	KRT5; KRT14;
Onset between 1-3 years	1	2	1.63934	14.9899	0.0659274	1	1	1	GALNS;
Onset between ages 16-55	2	6	3.27869	9.97687	0.0151987	1	1	1	DNASE1; FCGR2B;
Onset birth to 6 months	1	1	1.63934	29.8313	0.0335165	1	1	1	SMN1;
Onset in adolescence or young adulthood	1	1	1.63934	29.8313	0.0335165	1	1	1	FBXO7;
Onset in childhood	1	26	1.63934	1.15839	0.590418	1	1	1	F13A1;
Onset in childhood of blistering and pigmentary changes	1	1	1.63934	29.8313	0.0335165	1	1	1	KRT5;
Onset in early childhood or adolescence	2	3	3.27869	19.9206	0.00324488	1	0.982533	1	KRT5; KRT14;
Onset in first 2 years with fractures	1	1	1.63934	29.8313	0.0335165	1	1	1	CA2;
Onset in first decades (males)	1	1	1.63934	29.8313	0.0335165	1	1	1	PDK3;
Onset in infancy	1	82	1.63934	0.36739	0.942773	1	1	1	ELANE;
Onset in infancy or early childhood	1	25	1.63934	1.2047	0.57601	1	1	1	LRP5;
Onset in infancy or first years of life	1	1	1.63934	29.8313	0.0335165	1	1	1	ASAH1;
Onset in teens has been reported	1	4	1.63934	7.51363	0.127575	1	1	1	IL1B;
Onset of bone fragility in childhood	1	1	1.63934	29.8313	0.0335165	1	1	1	LRP5;
Onset of disease in late childhood	1	1	1.63934	29.8313	0.0335165	1	1	1	LRP5;
Onset of hyperpigmentation in early childhood (3 months-6 years) that fades after puberty	1	1	1.63934	29.8313	0.0335165	1	1	1	KRT14;
Onset of muscle weakness around age 5 years	1	1	1.63934	29.8313	0.0335165	1	1	1	ASAH1;
Onset of seizures around 7 to 12 years	1	1	1.63934	29.8313	0.0335165	1	1	1	ASAH1;
Onset usually before age 40 years	1	1	1.63934	29.8313	0.0335165	1	1	1	HLA-DRB1;
Onset usually in childhood or adolescence	1	5	1.63934	6.0139	0.15688	1	1	1	SMN1;
Onset usually in second or third decades	1	1	1.63934	29.8313	0.0335165	1	1	1	DES;
Onychodystrophy	1	6	1.63934	5.01325	0.185216	1	1	1	KRT14;
Onychogryposis	1	3	1.63934	10.0099	0.0972687	1	1	1	CTSC;
Onycholysis, mild (in some patients)	1	1	1.63934	29.8313	0.0335165	1	1	1	DSG1;
Optic atrophy	2	82	3.27869	0.731142	0.772184	1	1	1	ARSA; PPT1;
Oral blistering	2	2	3.27869	29.8313	0.00110555	1	0.452537	1	KRT5; KRT14;
Orange peel' skin (large pores)	1	1	1.63934	29.8313	0.0335165	1	1	1	EBP;
Orofacial dystonia	1	1	1.63934	29.8313	0.0335165	1	1	1	FTL;
Orolingual dyskinesia	1	1	1.63934	29.8313	0.0335165	1	1	1	FTL;
Oromandibular dyskinesia	1	1	1.63934	29.8313	0.0335165	1	1	1	FTL;
Orthohyperkeratosis	1	1	1.63934	29.8313	0.0335165	1	1	1	DSG1;
Osteogenic sarcoma	1	5	1.63934	6.0139	0.15688	1	1	1	RB1;
OSTEOGENIC SARCOMA	1	3	1.63934	10.0099	0.0972687	1	1	1	RB1;
Osteoporosis	1	42	1.63934	0.717202	0.765075	1	1	1	GALNS;
OSTEOPOROSIS	1	6	1.63934	5.01325	0.185216	1	1	1	LRP5;
Osteoporosis (onset in childhood)	1	1	1.63934	29.8313	0.0335165	1	1	1	LRP5;
Osteosclerosis	2	10	3.27869	5.99011	0.0418252	1	1	1	DHCR24; CA2;
Other	13	384	21.3115	1.01067	0.535588	1	1	1	DHCR24; EBP; GALT; MMAB; NDUFAF3; ADA; DHCR7; NBN; KRT5; FUCA1; KRT14; KIAA0196; ASAH1;
Otitis media	1	11	1.63934	2.73657	0.313434	1	1	1	NBN;
Otitis media, recurrent	1	3	1.63934	10.0099	0.0972687	1	1	1	ICOS;
Ovarian failure due to hypergonadotropic hypogonadism	1	1	1.63934	29.8313	0.0335165	1	1	1	GALT;
Overriding aorta	1	2	1.63934	14.9899	0.0659274	1	1	1	HCCS;
Overriding toes	1	3	1.63934	10.0099	0.0972687	1	1	1	DHCR7;
Ovoid vertebral bodies	1	9	1.63934	3.34402	0.264723	1	1	1	GALNS;
Ovotestis	1	1	1.63934	29.8313	0.0335165	1	1	1	HCCS;
Painful swollen joints	1	1	1.63934	29.8313	0.0335165	1	1	1	ASAH1;
Painful tender mass at long bone metaphysis	1	3	1.63934	10.0099	0.0972687	1	1	1	RB1;
Palatal tremor	1	1	1.63934	29.8313	0.0335165	1	1	1	FTL;
Pale optic disks	1	19	1.63934	1.58494	0.478482	1	1	1	NDUFAF3;
Palmoplantar epidermolytic hyperkeratosis along Blaschko lines (rare)	1	2	1.63934	14.9899	0.0659274	1	1	1	KRT1;
Palmoplantar hyperkeratosis	1	7	1.63934	4.2981	0.212615	1	1	1	KRT14;
Palmoplantar keratoderma	2	7	3.27869	8.55364	0.0208222	1	1	1	JUP; KRT14;
Pancreas	1	51	1.63934	0.590662	0.82854	1	1	1	BCKDHB;
Pancreatitis	1	22	1.63934	1.36891	0.529726	1	1	1	BCKDHB;
Pancytopenia (in 50% of patients)	1	2	1.63934	14.9899	0.0659274	1	1	1	MMAB;
Papillomatosis Hypergranulosis	1	1	1.63934	29.8313	0.0335165	1	1	1	DSG1;
Paresthesias	1	14	1.63934	2.15058	0.380608	1	1	1	HLA-DRB1;
Parkinsonism	2	42	3.27869	1.4273	0.414738	1	1	1	FBXO7; FTL;
Partial or complete agenesis of the corpus callosum	1	1	1.63934	29.8313	0.0335165	1	1	1	DHCR24;
Patchy areas of alopecia	1	1	1.63934	29.8313	0.0335165	1	1	1	EBP;
Patent ductus arteriosus	1	41	1.63934	0.73469	0.756733	1	1	1	DHCR7;
Patients from 4 unrelated families have been reported (as of October 2011)	1	1	1.63934	29.8313	0.0335165	1	1	1	DHCR24;
Patients remain ambulatory	1	1	1.63934	29.8313	0.0335165	1	1	1	PDK3;
Patients with adult onset present with psychiatric features	1	1	1.63934	29.8313	0.0335165	1	1	1	PPT1;
Patients with later onset have better prognosis	1	1	1.63934	29.8313	0.0335165	1	1	1	GAA;
Pelvic dysplasia	1	1	1.63934	29.8313	0.0335165	1	1	1	ADA;
Pelvis	6	153	9.83607	1.17173	0.407512	1	1	1	EBP; ADA; DHCR7; LRP5; FUCA1; GALNS;
Penetrance of 70 to 80% over a lifetime in heterozygous mutation carriers	1	4	1.63934	7.51363	0.127575	1	1	1	IL1B;
Periarticular subcutaneous nodules	1	1	1.63934	29.8313	0.0335165	1	1	1	ASAH1;
Pericarditis	2	7	3.27869	8.55364	0.0208222	1	1	1	DNASE1; FCGR2B;
Perinuclear vacuolization of keratinocytes	1	2	1.63934	14.9899	0.0659274	1	1	1	KRT1;
PERIODONTITIS, AGGRESSIVE, 1	1	1	1.63934	29.8313	0.0335165	1	1	1	CTSC;
Periodontium is less severely affected than in Papillon-Lefevre syndrome	1	1	1.63934	29.8313	0.0335165	1	1	1	CTSC;
Peripheral Nervous System	8	178	13.1148	1.34233	0.240993	1	1	1	HLA-DRB1; PDK3; SMN1; ARSA; GAA; FUCA1; KIAA0196; ASAH1;
Peripheral neuropathy	1	26	1.63934	1.15839	0.590418	1	1	1	FUCA1;
Peripheral retinal avascularization	1	2	1.63934	14.9899	0.0659274	1	1	1	LRP5;
Periventricular gray matter heterotopias	1	1	1.63934	29.8313	0.0335165	1	1	1	DHCR7;
Peroneal atrophy	1	1	1.63934	29.8313	0.0335165	1	1	1	DES;
Perseverative behavior	1	1	1.63934	29.8313	0.0335165	1	1	1	NPC2;
Persistent pupillary membrane (in some patients)	1	1	1.63934	29.8313	0.0335165	1	1	1	ADAMTSL4;
Pes cavus	2	58	3.27869	1.03363	0.587266	1	1	1	PDK3; KIAA0196;
Pes equinovarus	1	3	1.63934	10.0099	0.0972687	1	1	1	FBXO7;
Pes planus	1	37	1.63934	0.814095	0.720355	1	1	1	CTSC;
Pharyngeal dystonia	1	1	1.63934	29.8313	0.0335165	1	1	1	FTL;
Photophobia	1	29	1.63934	1.0386	0.630816	1	1	1	HLA-DRB1;
Photosensitivity	2	15	3.27869	3.99474	0.0877175	1	1	1	DNASE1; FCGR2B;
Phthisis bulbi	1	3	1.63934	10.0099	0.0972687	1	1	1	LRP5;
Pigmentary retinopathy	1	34	1.63934	0.885906	0.689608	1	1	1	HCCS;
Pinealoma (trilateral retinoblastoma)	1	1	1.63934	29.8313	0.0335165	1	1	1	RB1;
Pitted, perioral acneiform scars	1	1	1.63934	29.8313	0.0335165	1	1	1	KRT5;
Placenta and Umbilical Cord	1	10	1.63934	3.00996	0.289489	1	1	1	KIAA0196;
Platyspondyly	3	26	4.91803	3.45222	0.0538544	1	1	1	ADA; LRP5; GALNS;
Pleuritis	2	7	3.27869	8.55364	0.0208222	1	1	1	DNASE1; FCGR2B;
Pneumonia	1	15	1.63934	2.00731	0.401529	1	1	1	ADA;
Pneumonia, recurrent	1	2	1.63934	14.9899	0.0659274	1	1	1	ICOS;
Pointed proximal second through fifth metacarpals	1	2	1.63934	14.9899	0.0659274	1	1	1	GALNS;
Polyarthritis	1	1	1.63934	29.8313	0.0335165	1	1	1	HLA-DRB1;
Polyhydramnios	1	45	1.63934	0.669399	0.788447	1	1	1	EBP;
Poor feeding	3	70	4.91803	1.28256	0.41934	1	1	1	MMAB; NDUFAF3; CPT1A;
Poor head control	1	2	1.63934	14.9899	0.0659274	1	1	1	HEXA;
Poor school performance	2	3	3.27869	19.9206	0.00324488	1	0.982533	1	ARSA; NPC2;
Poor suck	1	2	1.63934	14.9899	0.0659274	1	1	1	DHCR7;
Positive Kveim-Siltzbach skin test	1	1	1.63934	29.8313	0.0335165	1	1	1	HLA-DRB1;
Positive urine DNPH screening test	1	3	1.63934	10.0099	0.0972687	1	1	1	BCKDHB;
Postaxial polydactyly	1	23	1.63934	1.30942	0.545681	1	1	1	DHCR7;
Postaxial polydactyly (rare)	1	4	1.63934	7.51363	0.127575	1	1	1	EBP;
Posterior fossa cysts	1	1	1.63934	29.8313	0.0335165	1	1	1	KIAA0196;
Posteriorly rotated ears	2	32	3.27869	1.8732	0.291446	1	1	1	DHCR24; DHCR7;
Postmenopausal osteoporosis	1	6	1.63934	5.01325	0.185216	1	1	1	LRP5;
Postural instability	1	14	1.63934	2.15058	0.380608	1	1	1	FBXO7;
Precipitated by infection, fasting, or intercurrent illness	1	1	1.63934	29.8313	0.0335165	1	1	1	CPT1A;
Premature death	1	1	1.63934	29.8313	0.0335165	1	1	1	NBN;
Premature sudden cardiac death	1	1	1.63934	29.8313	0.0335165	1	1	1	TGFB3;
Premature tooth	1	1	1.63934	29.8313	0.0335165	1	1	1	CTSC;
Premature tooth loss	2	2	3.27869	29.8313	0.00110555	1	0.452537	1	KRT14; CTSC;
Premature tooth loss (both primary and secondary dentition)	1	1	1.63934	29.8313	0.0335165	1	1	1	CTSC;
Prenatal growth retardation	1	5	1.63934	6.0139	0.15688	1	1	1	NBN;
Prenatal Manifestations	6	115	9.83607	1.55888	0.18363	1	1	1	EBP; SMN1; CPT1A; DHCR7; NPC2; KIAA0196;
Presence of vacuoles on muscle biopsy	1	1	1.63934	29.8313	0.0335165	1	1	1	GAA;
Presentation after 18 months	1	2	1.63934	14.9899	0.0659274	1	1	1	SMN1;
Presentation between 6-18 months	1	1	1.63934	29.8313	0.0335165	1	1	1	SMN1;
Primary ovarian failure	1	3	1.63934	10.0099	0.0972687	1	1	1	NBN;
'Primary' pulmonary hypertension	2	2	3.27869	29.8313	0.00110555	1	0.452537	1	KRT18; KRT8;
Progeric hair changes	1	1	1.63934	29.8313	0.0335165	1	1	1	ATM;
Progeric skin changes	1	1	1.63934	29.8313	0.0335165	1	1	1	ATM;
Prognathism	1	18	1.63934	1.67294	0.460209	1	1	1	GALNS;
Progression to tetraplegia and decerebrate state	1	1	1.63934	29.8313	0.0335165	1	1	1	ARSA;
Progressive disorder	4	69	6.55738	1.73343	0.197871	1	1	1	SMN1; KIAA0196; ASAH1; FTL;
Progressive polyneuropathy	1	1	1.63934	29.8313	0.0335165	1	1	1	ARSA;
Progressive reticulate hyperpigmentation (axillae, groin, perineal, perianal)	1	1	1.63934	29.8313	0.0335165	1	1	1	KRT5;
Progressive sclerosis with age	1	2	1.63934	14.9899	0.0659274	1	1	1	LRP5;
Progressive thickening of diploic spaces	1	1	1.63934	29.8313	0.0335165	1	1	1	FUCA1;
Progressive vitiligo	1	1	1.63934	29.8313	0.0335165	1	1	1	NBN;
Prominent forehead	1	36	1.63934	0.836702	0.710454	1	1	1	FUCA1;
Prominent midface	1	2	1.63934	14.9899	0.0659274	1	1	1	NBN;
Prominent occiput	1	9	1.63934	3.34402	0.264723	1	1	1	KIAA0196;
Prominent sternum	1	4	1.63934	7.51363	0.127575	1	1	1	GALNS;
Promyelocytes have atypical nuclei and vacuolization of the cytoplasm	1	1	1.63934	29.8313	0.0335165	1	1	1	ELANE;
Pronounced calvarial sclerosis	1	1	1.63934	29.8313	0.0335165	1	1	1	LRP5;
PROSTATE CANCER	1	12	1.63934	2.50871	0.336586	1	1	1	CD82;
Proximally placed thumbs	1	7	1.63934	4.2981	0.212615	1	1	1	DHCR7;
Proximal muscle weakness	1	12	1.63934	2.50871	0.336586	1	1	1	GAA;
Proximal muscle weakness and atrophy	1	2	1.63934	14.9899	0.0659274	1	1	1	SMN1;
Proximal muscle weakness occurs later	1	1	1.63934	29.8313	0.0335165	1	1	1	DES;
Pseudoarylsulfatase A deficiency is an allelic disorder with reduced levels of ARSA activity, but no neurologic manifestations	1	1	1.63934	29.8313	0.0335165	1	1	1	ARSA;
Pseudoglioma	1	1	1.63934	29.8313	0.0335165	1	1	1	LRP5;
Psychomotor degeneration	2	3	3.27869	19.9206	0.00324488	1	0.982533	1	PPT1; HEXA;
Psychomotor regression	1	20	1.63934	1.50573	0.496145	1	1	1	NDUFAF3;
Psychosis	3	26	4.91803	3.45222	0.0538544	1	1	1	DNASE1; FCGR2B; NPC2;
Ptosis	2	107	3.27869	0.560331	0.884812	1	1	1	NDUFAF3; DHCR7;
Pulm	1	9	1.63934	3.34402	0.264723	1	1	1	HLA-DRB1;
Pulmonary embolism	1	5	1.63934	6.0139	0.15688	1	1	1	F13A1;
Pulmonary function tests show interstitial lung disease	1	1	1.63934	29.8313	0.0335165	1	1	1	HLA-DRB1;
Pulmonary involvement, severe	1	1	1.63934	29.8313	0.0335165	1	1	1	NPC2;
Pulmonary parenchymal infiltration	1	1	1.63934	29.8313	0.0335165	1	1	1	HLA-DRB1;
Pulmonic stenosis	1	7	1.63934	4.2981	0.212615	1	1	1	KIAA0196;
Pulverulent cataract (in some patients)	1	1	1.63934	29.8313	0.0335165	1	1	1	FTL;
Punctate calcifications of carpals	1	1	1.63934	29.8313	0.0335165	1	1	1	EBP;
Punctate calcifications of tarsals	1	1	1.63934	29.8313	0.0335165	1	1	1	EBP;
Punctate calcific stippling sternum, ribs, coracoid process, and glenoid fossae of scapula	1	1	1.63934	29.8313	0.0335165	1	1	1	EBP;
Punctate palmoplantar hyperkeratosis (later onset)	1	1	1.63934	29.8313	0.0335165	1	1	1	KRT5;
Pyloric stenosis	1	10	1.63934	3.00996	0.289489	1	1	1	DHCR7;
Pyramidal signs	1	23	1.63934	1.30942	0.545681	1	1	1	FBXO7;
Radial aplasia	1	6	1.63934	5.01325	0.185216	1	1	1	FANCD2;
Radiology	1	28	1.63934	1.07567	0.617806	1	1	1	RB1;
Radioresistant DNA synthesis	1	1	1.63934	29.8313	0.0335165	1	1	1	NBN;
Recurrent bacterial infections	1	8	1.63934	3.7615	0.239108	1	1	1	ICOS;
Recurrent bacterial, viral, and fungal infections	1	2	1.63934	14.9899	0.0659274	1	1	1	ADA;
Recurrent pneumonia	1	2	1.63934	14.9899	0.0659274	1	1	1	NBN;
Recurrent pyogenic skin infections	1	1	1.63934	29.8313	0.0335165	1	1	1	CTSC;
Recurrent respiratory infections	2	15	3.27869	3.99474	0.0877175	1	1	1	FUCA1; ASAH1;
Recurrent severe infections	1	1	1.63934	29.8313	0.0335165	1	1	1	ELANE;
Recurrent urinary tract infections	1	8	1.63934	3.7615	0.239108	1	1	1	NBN;
Reduced/absent deep tendon reflexes	1	1	1.63934	29.8313	0.0335165	1	1	1	ATM;
Reduced CD4+ T cells	1	1	1.63934	29.8313	0.0335165	1	1	1	ATM;
Reduced erythrocyte adenosine deaminase activity	1	1	1.63934	29.8313	0.0335165	1	1	1	ADA;
Reduced IgA levels	1	1	1.63934	29.8313	0.0335165	1	1	1	ATM;
Reduced IgE levels	1	1	1.63934	29.8313	0.0335165	1	1	1	ATM;
Reduced IgG levels, particularly the IgG2 subclass	1	1	1.63934	29.8313	0.0335165	1	1	1	ATM;
Reduced IgM levels	1	3	1.63934	10.0099	0.0972687	1	1	1	ICOS;
Reduced levels of cells with IgM receptors	1	1	1.63934	29.8313	0.0335165	1	1	1	ATM;
Reduced numbers of T cells	1	1	1.63934	29.8313	0.0335165	1	1	1	ATM;
Reduced or abolished electroretinogram (ERG)	1	1	1.63934	29.8313	0.0335165	1	1	1	PPT1;
Reduced upgaze	1	1	1.63934	29.8313	0.0335165	1	1	1	FBXO7;
Relatively increased number of natural killer cells	1	1	1.63934	29.8313	0.0335165	1	1	1	NBN;
Renal agenesis	1	14	1.63934	2.15058	0.380608	1	1	1	DHCR7;
Renal tubular acidosis	1	5	1.63934	6.0139	0.15688	1	1	1	CPT1A;
Renal tubular acidosis, type I	1	1	1.63934	29.8313	0.0335165	1	1	1	CA2;
Resistance of bone to fractures	1	1	1.63934	29.8313	0.0335165	1	1	1	LRP5;
Resp	1	22	1.63934	1.36891	0.529726	1	1	1	HNMT;
Respiratory	21	360	34.4262	1.74094	0.00456231	1	1	1	ATM; DES; EBP; HLA-DRB1; MMAB; NDUFAF3; SMN1; ADA; GAA; DHCR7; ICOS; NBN; DNASE1; FCGR2B; F13A1; FUCA1; NPC2; ASAH1; HEXA; FTL; GALNS;
Respiratory distress	1	13	1.63934	2.31588	0.358968	1	1	1	MMAB;
Respiratory failure	3	42	4.91803	2.1374	0.16406	1	1	1	NDUFAF3; SMN1; NPC2;
Respiratory failure due to muscle weakness	1	9	1.63934	3.34402	0.264723	1	1	1	GAA;
Respiratory infections	1	1	1.63934	29.8313	0.0335165	1	1	1	GAA;
Respiratory insufficiency	1	35	1.63934	0.860601	0.70021	1	1	1	NDUFAF3;
Respiratory insufficiency due to muscle weakness	1	10	1.63934	3.00996	0.289489	1	1	1	ASAH1;
Respiratory muscle weakness	1	2	1.63934	14.9899	0.0659274	1	1	1	DES;
Restrictive heart failure	1	1	1.63934	29.8313	0.0335165	1	1	1	DES;
Restrictive lung disease	1	9	1.63934	3.34402	0.264723	1	1	1	GALNS;
Reticulate acropigmentation of Kitamura (hyperpigmentation found primarily in hands and feet)	1	1	1.63934	29.8313	0.0335165	1	1	1	KRT5;
Reticulate hyperpigmentation onset birth - 2 years	1	1	1.63934	29.8313	0.0335165	1	1	1	KRT14;
Reticulate hyperpigmentation (periocular, perioral, chest, neck, abdomen)	1	1	1.63934	29.8313	0.0335165	1	1	1	KRT14;
Reticulate hyperpigmentation (primarily trunk)	1	1	1.63934	29.8313	0.0335165	1	1	1	KRT14;
Reticulate pigmentation (bulbar conjunctiva)	1	1	1.63934	29.8313	0.0335165	1	1	1	KRT14;
Reticulate pigmentation (oral mucosa)	1	1	1.63934	29.8313	0.0335165	1	1	1	KRT14;
Retinal calcification	1	1	1.63934	29.8313	0.0335165	1	1	1	RB1;
Retinal degeneration	1	13	1.63934	2.31588	0.358968	1	1	1	PPT1;
Retinal detachment (rare)	1	2	1.63934	14.9899	0.0659274	1	1	1	ADAMTSL4;
Retinal exudates	1	3	1.63934	10.0099	0.0972687	1	1	1	LRP5;
Retinal pigment epithelial migration and proliferation	1	1	1.63934	29.8313	0.0335165	1	1	1	RB1;
Retinoblastoma (25% bilateral, 15% unilateral)	1	1	1.63934	29.8313	0.0335165	1	1	1	RB1;
Retinomas (translucent, grayish retinal mass protruding into the vitreous)	1	1	1.63934	29.8313	0.0335165	1	1	1	RB1;
Rhabdomyosarcoma	1	9	1.63934	3.34402	0.264723	1	1	1	NBN;
Rheumatoid arthritis	1	8	1.63934	3.7615	0.239108	1	1	1	HLA-DRB1;
Rheumatoid lung disease	1	8	1.63934	3.7615	0.239108	1	1	1	HLA-DRB1;
Rheumatoid nodules	1	8	1.63934	3.7615	0.239108	1	1	1	HLA-DRB1;
Rheumatoid vasculitic mononeuritis	1	8	1.63934	3.7615	0.239108	1	1	1	HLA-DRB1;
Rheumatoid vasculitis	1	8	1.63934	3.7615	0.239108	1	1	1	HLA-DRB1;
Rhizomelic shortening	1	8	1.63934	3.7615	0.239108	1	1	1	DHCR24;
Ribs, Sternum, Clavicles and Scapulae	6	162	9.83607	1.10664	0.463452	1	1	1	EBP; GAA; LRP5; FUCA1; KIAA0196; GALNS;
Ridged nails	2	2	3.27869	29.8313	0.00110555	1	0.452537	1	KRT5; KRT14;
Ridging (in some patients)	1	1	1.63934	29.8313	0.0335165	1	1	1	DSG1;
Rigidity	2	28	3.27869	2.1407	0.240907	1	1	1	FBXO7; FTL;
Saddle nose	1	4	1.63934	7.51363	0.127575	1	1	1	EBP;
SANDHOFF DISEASE	1	1	1.63934	29.8313	0.0335165	1	1	1	HEXB;
Sarcoid-associated optic neuropathy (1-5% of patients with neurosarcoidosis)	1	1	1.63934	29.8313	0.0335165	1	1	1	HLA-DRB1;
Scaly skin	2	2	3.27869	29.8313	0.00110555	1	0.452537	1	KRT10; KRT1;
Scattered CNS demyelination	1	3	1.63934	10.0099	0.0972687	1	1	1	HLA-DRB1;
Scissor gait	1	1	1.63934	29.8313	0.0335165	1	1	1	FBXO7;
Sclerocornea	1	3	1.63934	10.0099	0.0972687	1	1	1	HCCS;
Sclerodermatous skin changes	1	1	1.63934	29.8313	0.0335165	1	1	1	ATM;
Scoliosis	4	118	6.55738	1.01367	0.567124	1	1	1	EBP; FUCA1; ASAH1; GALNS;
Sea-blue' histiocytes	1	2	1.63934	14.9899	0.0659274	1	1	1	NPC2;
See also MMAA (	1	1	1.63934	29.8313	0.0335165	1	1	1	MMAB;
Seizures	14	275	22.9508	1.51972	0.0650452	1	1	1	ATM; BCKDHB; DHCR24; NDUFAF3; ARSA; CPT1A; DHCR7; DNASE1; FCGR2B; FUCA1; NPC2; ASAH1; PPT1; HEXA;
Seizures are sensitive to hyperventilation	1	1	1.63934	29.8313	0.0335165	1	1	1	ASAH1;
Self injurious behavior	1	1	1.63934	29.8313	0.0335165	1	1	1	DHCR7;
Sensitive to chemotherapy and radiotherapy	1	1	1.63934	29.8313	0.0335165	1	1	1	RB1;
Sensorineural deafness	1	28	1.63934	1.07567	0.617806	1	1	1	NDUFAF3;
Sensory loss	1	4	1.63934	7.51363	0.127575	1	1	1	HLA-DRB1;
Separation of keratinocytes in spinous layer	1	1	1.63934	29.8313	0.0335165	1	1	1	DSG1;
Separation of keratinocytes in upper spinous and granular cell layers	1	1	1.63934	29.8313	0.0335165	1	1	1	DSG1;
Serum antinuclear antibody	2	6	3.27869	9.97687	0.0151987	1	1	1	DNASE1; FCGR2B;
Serum ferritin hyperglycosylation	1	1	1.63934	29.8313	0.0335165	1	1	1	FTL;
SEVERE COMBINED IMMUNODEFICIENCY, AUTOSOMAL RECESSIVE, T CELL-NEGATIVE, B CELL-NEGATIVE, NK CELL-NEGATIVE, DUE TO ADENOSINE DEAMINASE DEFICIENCY	1	1	1.63934	29.8313	0.0335165	1	1	1	ADA;
Severe, early-onset periodontitis	1	1	1.63934	29.8313	0.0335165	1	1	1	CTSC;
Severe phenotype	1	3	1.63934	10.0099	0.0972687	1	1	1	KIAA0196;
Severe photosensitivity	1	1	1.63934	29.8313	0.0335165	1	1	1	DHCR7;
Severity of clinical phenotype varies both within and between kindreds	1	1	1.63934	29.8313	0.0335165	1	1	1	FTL;
Short, broad toes	1	1	1.63934	29.8313	0.0335165	1	1	1	DHCR7;
Shortened P-R interval on EKG	1	1	1.63934	29.8313	0.0335165	1	1	1	GAA;
Short neck	1	63	1.63934	0.478173	0.887617	1	1	1	EBP;
Short nose	1	26	1.63934	1.15839	0.590418	1	1	1	DHCR24;
Short odontoid	1	1	1.63934	29.8313	0.0335165	1	1	1	FUCA1;
Short stature (3rd-10th percentile)	1	1	1.63934	29.8313	0.0335165	1	1	1	HCCS;
Short stature	5	172	8.19672	0.868874	0.699174	1	1	1	ATM; DHCR7; LRP5; FUCA1; CA2;
Short stature, most below 3rd percentile for height	1	1	1.63934	29.8313	0.0335165	1	1	1	NBN;
Short thumbs	1	3	1.63934	10.0099	0.0972687	1	1	1	DHCR7;
Short-trunked dwarfism	1	4	1.63934	7.51363	0.127575	1	1	1	GALNS;
Shrill screaming	1	1	1.63934	29.8313	0.0335165	1	1	1	DHCR7;
Signet ring cell adenocarcinoma	1	4	1.63934	7.51363	0.127575	1	1	1	IL1B;
Single kidney	1	1	1.63934	29.8313	0.0335165	1	1	1	DHCR7;
Single umbilical artery	1	4	1.63934	7.51363	0.127575	1	1	1	KIAA0196;
Sinusitis	3	8	4.91803	11.21	0.00178046	1	0.690446	1	ATM; ADA; NBN;
Sinusitis, recurrent	1	2	1.63934	14.9899	0.0659274	1	1	1	ICOS;
Skel	6	46	9.83607	3.89668	0.00363308	1	1	1	FANCD2; RB1; LRP5; HEXB; CTSA; CA2;
Skeletal	17	634	27.8689	0.800352	0.904745	1	1	1	DHCR24; EBP; FBXO7; HLA-DRB1; PDK3; ADA; DHCR7; DNASE1; LRP5; FCGR2B; FUCA1; CTSC; KIAA0196; ASAH1; PPT1; FTL; GALNS;
Skin	22	539	36.0656	1.21814	0.163319	1	1	1	ATM; EBP; FANCD2; HCCS; DSG1; DHCR7; NBN; DNASE1; FCGR2B; KRT5; KRT18; KRT8; KRT4; KRT10; JUP; FUCA1; KRT14; HEXB; CTSA; CTSC; KRT1; ASAH1;
Skin blistering	2	2	3.27869	29.8313	0.00110555	1	0.452537	1	KRT10; KRT1;
Skin erythroderma may resolve early, leaving atrophic lesions	1	1	1.63934	29.8313	0.0335165	1	1	1	EBP;
Skin Histology	4	53	6.55738	2.25662	0.0986759	1	1	1	DSG1; KRT5; KRT10; KRT1;
Skin lesions follow the lines of Blaschko	1	1	1.63934	29.8313	0.0335165	1	1	1	EBP;
Skin manifestations are more severe and of later onset than Papillon-Lefevre syndrome	1	1	1.63934	29.8313	0.0335165	1	1	1	CTSC;
[truncated: 175 more rows]

## Sheet: COSMIC
Analysis: COSMIC
[truncated: 38 more rows]
