# Supplementary material
Source: Preprints.org preprint supplement (doi:10.20944/preprints202108.0038.v1)
Supplement: Supplementary file 3 [file Supplementaltables2_SecretomesBanLec.xlsx]

## Sheet: Dataset(BanLecsecretomep005)
Name of dataset: BanLecsecretomep005
No. of identified items: 217 of 225
No. of unidentified items: 8
ID type: GeneSymbol
Number of mapped gene: 217
Is dataset quantitative :NO
Mapped items:
Dataset item (Gene symbol )		Entrez ID	Gene symbol	Description	Alternate names	Chromosome	Map location
ACSL5		51703	ACSL5	acyl-CoA synthetase long-chain family member 5	ACS2|ACS5|FACL5	10	10q25.2
ADPGK		83440	ADPGK	ADP-dependent glucokinase	2610017G09Rik|ADP-GK	15	15q24.1
APPL2		55198	APPL2	adaptor protein, phosphotyrosine interaction, PH domain and leucine zipper containing 2	DIP13B	12	12q24.1
ARL6IP1		23204	ARL6IP1	ADP-ribosylation factor-like 6 interacting protein 1	AIP1|ARL6IP|ARMER|SPG61	16	16p12-p11.2
ATP2B4		493	ATP2B4	ATPase, Ca++ transporting, plasma membrane 4	ATP2B2|MXRA1|PMCA4|PMCA4b|PMCA4x	1	1q32.1
ATRX		546	ATRX	alpha thalassemia/mental retardation syndrome X-linked	ATR2|JMS|MRXHF1|RAD54|RAD54L|SFM1|SHS|XH2|XNP|ZNF-HX	X	Xq21.1
BICD2		23299	BICD2	bicaudal D homolog 2 (Drosophila)	SMALED2|bA526D8.1	9	9q22.31
CD226		10666	CD226	CD226 molecule	DNAM-1|DNAM1|PTA1|TLiSA1	18	18q22.3
CD27		939	CD27	CD27 molecule	S152|S152. LPFS2|T14|TNFRSF7|Tp55	12	12p13
CDK6		1021	CDK6	cyclin-dependent kinase 6	MCPH12|PLSTIRE	7	7q21-q22
CHST11		50515	CHST11	carbohydrate (chondroitin 4) sulfotransferase 11	C4ST|C4ST-1|C4ST1|HSA269537	12	12q
CLEC1B		51266	CLEC1B	C-type lectin domain family 1, member B	1810061I13Rik|CLEC2|CLEC2B|PRO1384|QDED721	12	12p13.2
CLN5		1203	CLN5	ceroid-lipofuscinosis, neuronal 5	NCL	13	13q21.1-q32
CNOT10		25904	CNOT10	CCR4-NOT transcription complex, subunit 10	-	3	3p22.3
DOHH		83475	DOHH	deoxyhypusine hydroxylase/monooxygenase	HLRC1|hDOHH	19	19p13.3
EFR3A		23167	EFR3A	EFR3 homolog A	-	8	8q24.22
EXOSC5		56915	EXOSC5	exosome component 5	RRP41B|RRP46|Rrp46p|hRrp46p|p12B	19	19q13.1
F2RL3		9002	F2RL3	coagulation factor II (thrombin) receptor-like 3	PAR4	19	19p12
FAM45A		404636	FAM45A	family with sequence similarity 45, member A	-	10	10q25
FBXO7		25793	FBXO7	F-box protein 7	FBX|FBX07|FBX7|PARK15|PKPS	22	22q12.3
FGFR1OP		11116	FGFR1OP	FGFR1 oncogene partner	FOP	6	6q27
GIMAP8		155038	GIMAP8	GTPase, IMAP family member 8	IAN-9|IAN6|IAN9|IANT	7	7q36.1
GLRX		2745	GLRX	glutaredoxin (thioltransferase)	GRX|GRX1	5	5q14
GORASP2		26003	GORASP2	golgi reassembly stacking protein 2, 55kDa	GOLPH6|GRASP55|GRS2|p59	2	2q31.1
GZMA		3001	GZMA	granzyme A (granzyme 1, cytotoxic T-lymphocyte-associated serine esterase 3)	CTLA3|HFSP	5	5q11-q12
HDAC3		8841	HDAC3	histone deacetylase 3	HD3|RPD3|RPD3-2	5	5q31
HEATR5B		54497	HEATR5B	HEAT repeat containing 5B	-	2	2p22.2
HNRNPH3		3189	HNRNPH3	heterogeneous nuclear ribonucleoprotein H3 (2H9)	2H9|HNRPH3	10	10q22
IFNG		3458	IFNG	interferon, gamma	IFG|IFI	12	12q14
IL18		3606	IL18	interleukin 18	IGIF|IL-18|IL-1g|IL1F4	11	11q23.1
IL2		3558	IL2	interleukin 2	IL-2|TCGF|lymphokine	4	4q26-q27
IPO11		51194	IPO11	importin 11	RanBP11	5	5q12.1
KIAA1033		23325	KIAA1033	KIAA1033	MRT43|SWIP	12	12q24.11
LIF		3976	LIF	leukemia inhibitory factor	CDF|DIA|HILDA|MLPLI	22	22q12.2
LRPAP1		4043	LRPAP1	low density lipoprotein receptor-related protein associated protein 1	A2MRAP|A2RAP|HBP44|MRAP|MYP23|RAP|alpha-2-MRAP	4	4p16.3
LRRC47		57470	LRRC47	leucine rich repeat containing 47	-	1	1p36.32
LTA		4049	LTA	lymphotoxin alpha	LT|TNFB|TNFSF1	6	6p21.3
M6PR		4074	M6PR	mannose-6-phosphate receptor (cation dependent)	CD-MPR|MPR 46|MPR-46|MPR46|SMPR	12	12p13
MMP8		4317	MMP8	matrix metallopeptidase 8	CLG1|HNC|MMP-8|PMNL-CL	11	11q22.3
NCKAP1		10787	NCKAP1	NCK-associated protein 1	HEM2|NAP1|NAP125|p125Nap1	2	2q32
NUDCD1		84955	NUDCD1	NudC domain containing 1	CML66|OVA66	8	8q23
NUP62		23636	NUP62	nucleoporin 62kDa	IBSN|SNDI|p62	19	19q13.33
OSM		5008	OSM	oncostatin M	-	22	22q12.2
PAF1		54623	PAF1	PAF1 homolog, Paf1/RNA polymerase II complex component	F23149_1|PD2	19	19q13.1
PFKFB3		5209	PFKFB3	6-phosphofructo-2-kinase/fructose-2,6-biphosphatase 3	IPFK2|PFK2	10	10p15.1
PI4KA		5297	PI4KA	phosphatidylinositol 4-kinase, catalytic, alpha	PI4K-ALPHA|PIK4CA|pi4K230	22	22q11.21
PMVK		10654	PMVK	phosphomevalonate kinase	HUMPMKI|PMK|PMKA|PMKASE	1	1q22
PNKP		11284	PNKP	polynucleotide kinase 3'-phosphatase	AOA4|EIEE10|MCSZ|PNK	19	19q13.3-q13.4
POLE3		54107	POLE3	polymerase (DNA directed), epsilon 3, accessory subunit	CHARAC17|CHRAC17|YBL1|p17	9	9q33
PPP1R16B		26051	PPP1R16B	protein phosphatase 1, regulatory subunit 16B	ANKRD4|TIMAP	20	20q11.23
PRF1		5551	PRF1	perforin 1 (pore forming protein)	FLH2|HPLH2|P1|PFN1|PFP	10	10q22
PRPSAP1		5635	PRPSAP1	phosphoribosyl pyrophosphate synthetase-associated protein 1	PAP39	17	17q24-q25
RAB3D		9545	RAB3D	RAB3D, member RAS oncogene family	D2-2|GOV|RAB16|RAD3D	19	19p13.2
RAC1		5879	RAC1	ras-related C3 botulinum toxin substrate 1 (rho family, small GTP binding protein Rac1)	MIG5|Rac-1|TC-25|p21-Rac1	7	7p22
RANGRF		29098	RANGRF	RAN guanine nucleotide release factor	HSPC165|HSPC236|MOG1|RANGNRF	17	17p13.1
RECQL		5965	RECQL	RecQ helicase-like	RECQL1|RecQ1	12	12p12
RNMT		8731	RNMT	RNA (guanine-7-) methyltransferase	CMT1|CMT1c|MET|Met|RG7MT1|cm1p|hCMT1|hMet	18	18p11.21
RPS6KA1		6195	RPS6KA1	ribosomal protein S6 kinase, 90kDa, polypeptide 1	HU-1|MAPKAPK1A|RSK|RSK1|p90Rsk	1	1p
SEMA3F		6405	SEMA3F	sema domain, immunoglobulin domain (Ig), short basic domain, secreted, (semaphorin) 3F	SEMA-IV|SEMA4|SEMAK	3	3p21.3
SEMA4D		10507	SEMA4D	sema domain, immunoglobulin domain (Ig), transmembrane domain (TM) and short cytoplasmic domain, (semaphorin) 4D	C9orf164|CD100|M-sema-G|SEMAJ|coll-4	9	9q22.2
SHOC2		8036	SHOC2	SHOC2 leucine-rich repeat scaffold protein	SIAA0862|SOC2|SUR8	10	10q25
SIGLEC5		8778	SIGLEC5	sialic acid binding Ig-like lectin 5	CD170|CD33L2|OB-BP2|OBBP2|SIGLEC-5	19	19q13.3
SLC2A1		6513	SLC2A1	solute carrier family 2 (facilitated glucose transporter), member 1	CSE|DYT17|DYT18|DYT9|EIG12|GLUT|GLUT-1|GLUT1|GLUT1DS|HTLVR|PED	1	1p34.2
SLC31A1		1317	SLC31A1	solute carrier family 31 (copper transporter), member 1	COPT1|CTR1	9	9q32
SMPD1		6609	SMPD1	sphingomyelin phosphodiesterase 1, acid lysosomal	ASM|ASMASE|NPD	11	11p15.4-p15.1
SP100		6672	SP100	SP100 nuclear antigen	lysp100b	2	2q37.1
SRP72		6731	SRP72	signal recognition particle 72kDa	BMFF|BMFS1|HEL103	4	4q11
SRSF12		135295	SRSF12	serine/arginine-rich splicing factor 12	SFRS13B|SFRS19|SRrp35	6	6q15
SUCLG1		8802	SUCLG1	succinate-CoA ligase, alpha subunit	GALPHA|MTDPS9|SUCLA1	2	2p11.2
THOC2		57187	THOC2	THO complex 2	CXorf3|THO2|dJ506G2.1|hTREX120	X	Xq25-q26.3
TNFRSF18		8784	TNFRSF18	tumor necrosis factor receptor superfamily, member 18	AITR|CD357|GITR|GITR-D	1	1p36.3
TNFRSF4		7293	TNFRSF4	tumor necrosis factor receptor superfamily, member 4	ACT35|CD134|IMD16|OX40|TXGP1L	1	1p36
TNPO2		30000	TNPO2	transportin 2	IPO3|KPNB2B|TRN2	19	19p13.2
TOP2A		7153	TOP2A	topoisomerase (DNA) II alpha 170kDa	TOP2|TP2A	17	17q21-q22
TRMT1		55621	TRMT1	tRNA methyltransferase 1 homolog (S. cerevisiae)	TRM1	19	19p13.2
TSG101		7251	TSG101	tumor susceptibility 101	TSG10|VPS23	11	11p15
TSPAN5		10098	TSPAN5	tetraspanin 5	NET-4|NET4|TM4SF9|TSPAN-5	4	4q23
TUBA1C		84790	TUBA1C	tubulin, alpha 1c	TUBA6|bcm948	12	12q13.12
URM1		81605	URM1	ubiquitin related modifier 1	C9orf74	9	9q34.11
WBSCR22		114049	WBSCR22	Williams Beuren syndrome chromosome region 22	HASJ4442|HUSSY-3|MERM1|PP3381|WBMT	7	7q11.23
WDR4		10785	WDR4	WD repeat domain 4	TRM82|TRMT82	21	21q22.3
XRCC6		2547	XRCC6	X-ray repair complementing defective repair in Chinese hamster cells 6	CTC75|CTCBF|G22P1|KU70|ML8|TLAA	22	22q13.2
ZFP36L1		677	ZFP36L1	ZFP36 ring finger protein-like 1	BRF1|Berg36|ERF-1|ERF1|RNF162B|TIS11B|cMG1	14	14q22-q24
ZNF706		51123	ZNF706	zinc finger protein 706	HSPC038|PNAS-106|PNAS-113	8	8q22.3
CCDC9		26093	CCDC9	coiled-coil domain containing 9	-	19	19q13.32
CLUH		23277	CLUH	clustered mitochondria (cluA/CLU1) homolog	CLU1|KIAA0664	17	17p13.3
CXCL10		3627	CXCL10	chemokine (C-X-C motif) ligand 10	C7|IFI10|INP10|IP-10|SCYB10|crg-2|gIP-10|mob-1	4	4q21
DCK		1633	DCK	deoxycytidine kinase	-	4	4q13.3-q21.1
DXO		1797	DXO	decapping exoribonuclease	DOM3L|DOM3Z|NG6|RAI1	6	6p21.3
FKBP9		11328	FKBP9	FK506 binding protein 9, 63 kDa	FKBP60|FKBP63|PPIase	7	7p11.1
KIAA0040		9674	KIAA0040	KIAA0040	-	1	1q25.1
LAT		27040	LAT	linker for activation of T cells	LAT1|pp36	16	16p11.2
MSH2		4436	MSH2	mutS homolog 2	COCA1|FCC1|HNPCC|HNPCC1|LCFS2	2	2p21
NCBP2		22916	NCBP2	nuclear cap binding protein subunit 2, 20kDa	CBC2|CBP20|NIP1|PIG55	3	3q29
NUP85		79902	NUP85	nucleoporin 85kDa	FROUNT|Nup75	17	17q25.1
POLR1C		9533	POLR1C	polymerase (RNA) I polypeptide C, 30kDa	RPA39|RPA40|RPA5|RPAC1|TCS3	6	6p21.1
PPP2R5B		5526	PPP2R5B	protein phosphatase 2, regulatory subunit B', beta	B56B|PR61B	11	11q12
PRICKLE2		166336	PRICKLE2	prickle homolog 2	EPM5	3	3p14.1
RBM47		54502	RBM47	RNA binding motif protein 47	NET18	4	4p14
SDE2		163859	SDE2	SDE2 telomere maintenance homolog (S. pombe)	C1orf55|dJ671D7.1	1	1q42.12
ICOS		29851	ICOS	inducible T-cell co-stimulator	AILIM|CD278|CVID1	2	2q33
IL2RA		3559	IL2RA	interleukin 2 receptor, alpha	CD25|IDDM10|IL2R|TCGFR|p55	10	10p15-p14
LAG3		3902	LAG3	lymphocyte-activation gene 3	CD223	12	12p13.32
GZMB		3002	GZMB	granzyme B (granzyme 2, cytotoxic T-lymphocyte-associated serine esterase 1)	CCPI|CGL-1|CGL1|CSP-B|CSPB|CTLA1|CTSGL1|HLP|SECT	14	14q11.2
ARHGAP18		93663	ARHGAP18	Rho GTPase activating protein 18	MacGAP|SENEX|bA307O14.2	6	6q22.33
CD300C		10871	CD300C	CD300c molecule	CLM-6|CMRF-35|CMRF-35A|CMRF35|CMRF35-A1|CMRF35A|CMRF35A1|IGSF16|LIR	17	17q25.1
CREM		1390	CREM	cAMP responsive element modulator	CREM-2|ICER|hCREM-2	10	10p11.21
ESYT2		57488	ESYT2	extended synaptotagmin-like protein 2	CHR2SYT|E-Syt2|FAM62B	7	7q36.3
ITIH4		3700	ITIH4	inter-alpha-trypsin inhibitor heavy chain family, member 4	GP120|H4P|IHRP|ITI-HC4|ITIHL1|PK-120|PK120	3	3p21.1
JUP		3728	JUP	junction plakoglobin	ARVD12|CTNNG|DP3|DPIII|PDGB|PKGB	17	17q21
NAAA		27163	NAAA	N-acylethanolamine acid amidase	ASAHL|PLT	4	4q21.1
NOTCH2		4853	NOTCH2	notch 2	AGS2|HJCYS|hN2	1	1p13-p11
OLFML2B		25903	OLFML2B	olfactomedin-like 2B	-	1	1q23.3
PPP1R14A		94274	PPP1R14A	protein phosphatase 1, regulatory (inhibitor) subunit 14A	CPI-17|CPI17|PPP1INL	19	19q13.1
SYTL4		94121	SYTL4	synaptotagmin-like 4	SLP4	X	Xq21.33
TCN2		6948	TCN2	transcobalamin II	D22S676|D22S750|II|TC|TC II|TC-2|TC2|TCII	22	22q12.2
CAMSAP3		57662	CAMSAP3	calmodulin regulated spectrin-associated protein family, member 3	KIAA1543|NEZHA|PPP1R80	19	19p13.2
GCDH		2639	GCDH	glutaryl-CoA dehydrogenase	ACAD5|GCD	19	19p13.2
LDLRAD2		401944	LDLRAD2	low density lipoprotein receptor class A domain containing 2	-	1	1p36.12
LIMD1		8994	LIMD1	LIM domains containing 1	-	3	3p21.3
SPEG		10290	SPEG	SPEG complex locus	APEG-1|APEG1|BPEG|CNM5|SPEGalpha|SPEGbeta	2	2q35
ZNF662		389114	ZNF662	zinc finger protein 662	-	3	3p22.1
HDAC4		9759	HDAC4	histone deacetylase 4	AHO3|BDMR|HA6116|HD4|HDAC-4|HDAC-A|HDACA	2	2q37.3
GZMH		2999	GZMH	granzyme H (cathepsin G-like 2, protein h-CCPX)	CCP-X|CGL-2|CSP-C|CTLA1|CTSGL2	14	14q11.2
TGFBI		7045	TGFBI	transforming growth factor, beta-induced, 68kDa	BIGH3|CDB1|CDG2|CDGG1|CSD|CSD1|CSD2|CSD3|EBMD|LCD1	5	5q31
CD69		969	CD69	CD69 molecule	AIM|BL-AC/P26|CLEC2C|EA1|GP32/28|MLR-3	12	12p13
GFAP		2670	GFAP	glial fibrillary acidic protein	ALXDRD	17	17q21
C1QB		713	C1QB	complement component 1, q subcomponent, B chain	-	1	1p36.12
C1QA		712	C1QA	complement component 1, q subcomponent, A chain	-	1	1p36.12
MMP12		4321	MMP12	matrix metallopeptidase 12	HME|ME|MME|MMP-12	11	11q22.3
CST7		8530	CST7	cystatin F (leukocystatin)	CMAP	20	20p11.21
FOLR1		2348	FOLR1	folate receptor 1 (adult)	FBP|FOLR	11	11q13.3-q14.1
SMPDL3A		10924	SMPDL3A	sphingomyelin phosphodiesterase, acid-like 3A	ASM3A|ASML3a|yR36GH4.1	6	6q22.31
MRC1		4360	MRC1	mannose receptor, C type 1	CD206|CLEC13D|CLEC13DL|MMR|MRC1L1|bA541I19.1	10	10p12.33
CTSW		1521	CTSW	cathepsin W	LYPN	11	11q13.1
RRM1		6240	RRM1	ribonucleotide reductase M1	R1|RIR1|RR1	11	11p15.5
IDO1		3620	IDO1	indoleamine 2,3-dioxygenase 1	IDO|IDO-1|INDO	8	8p12-p11
CSF3		1440	CSF3	colony stimulating factor 3 (granulocyte)	C17orf33|CSF3OS|GCSF	17	17q11.2-q12
XCL2		6846	XCL2	chemokine (C motif) ligand 2	SCM-1b|SCM1B|SCYC2	1	1q24.2
SLC29A1		2030	SLC29A1	solute carrier family 29 (equilibrative nucleoside transporter), member 1	ENT1	6	6p21.1
KRT18		3875	KRT18	keratin 18, type I	CYK18|K18	12	12q13
PHGDH		26227	PHGDH	phosphoglycerate dehydrogenase	3-PGDH|3PGDH|HEL-S-113|NLS|NLS1|PDG|PGAD|PGD|PGDH|PHGDHD|SERA	1	1p12
CCL5		6352	CCL5	chemokine (C-C motif) ligand 5	D17S136E|RANTES|SCYA5|SIS-delta|SISd|TCP228|eoCP	17	17q12
TIMP2		7077	TIMP2	TIMP metallopeptidase inhibitor 2	CSC-21K|DDC8	17	17q25
FAM129B		64855	FAM129B	family with sequence similarity 129, member B	C9orf88|MEG-3|MINERVA|OC58|bA356B19.6	9	9q34.13
KRT5		3852	KRT5	keratin 5, type II	CK5|DDD|DDD1|EBS2|K5|KRT5A	12	12q13.13
KRT75		9119	KRT75	keratin 75, type II	K6HF|KB18|PFB	12	12q13
KRT79		338785	KRT79	keratin 79, type II	K6L|KRT6L	12	12q13.13
SMARCC1		6599	SMARCC1	SWI/SNF related, matrix associated, actin dependent regulator of chromatin, subfamily c, member 1	BAF155|CRACC1|Rsc8|SRG3|SWI3	3	3p21.31
BID		637	BID	BH3 interacting domain death agonist	FP497	22	22q11.1
AOAH		313	AOAH	acyloxyacyl hydrolase (neutrophil)	-	7	7p14.2
OXSR1		9943	OXSR1	oxidative stress responsive 1	OSR1	3	3p22.2
KRT1		3848	KRT1	keratin 1, type II	CK1|EHK|EHK1|EPPK|K1|KRT1A|NEPPK	12	12q13.13
STAB1		23166	STAB1	stabilin 1	CLEVER-1|FEEL-1|FELE-1|FEX1|STAB-1	3	3p21.1
OLFM1		10439	OLFM1	olfactomedin 1	AMY|NOE1|NOELIN1|OlfA	9	9q34.3
ASNS		440	ASNS	asparagine synthetase (glutamine-hydrolyzing)	ASNSD|TS11	7	7q21.3
CFD		1675	CFD	complement factor D (adipsin)	ADIPSIN|ADN|DF|PFD	19	19p13.3
C4BPA		722	C4BPA	complement component 4 binding protein, alpha	C4BP|PRP	1	1q32
CTSS		1520	CTSS	cathepsin S	-	1	1q21
PPP3R1		5534	PPP3R1	protein phosphatase 3, regulatory subunit B, alpha	CALNB1|CNB|CNB1	2	2p15
RALB		5899	RALB	v-ral simian leukemia viral oncogene homolog B	-	2	2q14.2
LIPG		9388	LIPG	lipase, endothelial	EDL|EL|PRO719	18	18q21.1
SLC1A5		6510	SLC1A5	solute carrier family 1 (neutral amino acid transporter), member 5	AAAT|ASCT2|ATBO|M7V1|M7VS1|R16|RDRC	19	19q13.3
GM2A		2760	GM2A	GM2 ganglioside activator	GM2-AP|SAP-3	5	5q33.1
SDS		10993	SDS	serine dehydratase	SDH	12	12q24.13
B4GALT5		9334	B4GALT5	UDP-Gal:betaGlcNAc beta 1,4- galactosyltransferase, polypeptide 5	B4Gal-T5|BETA4-GALT-IV|beta4Gal-T5|beta4GalT-V|gt-V	20	20q13.1-q13.2
RNASE6		6039	RNASE6	ribonuclease, RNase A family, k6	RAD1|RNS6|RNasek6	14	14q11.2
CEP128		145508	CEP128	centrosomal protein 128kDa	C14orf145|C14orf61|LEDP/132	14	14q31.1
GBP2		2634	GBP2	guanylate binding protein 2, interferon-inducible	-	1	1p22.2
KRT8		3856	KRT8	keratin 8, type II	CARD2|CK-8|CK8|CYK8|K2C8|K8|KO	12	12q13
NPL		80896	NPL	N-acetylneuraminate pyruvate lyase (dihydrodipicolinate synthase)	C112|C1orf13|NAL|NPL1	1	1q25
PLBD2		196463	PLBD2	phospholipase B domain containing 2	P76	12	12q24.13
CTSA		5476	CTSA	cathepsin A	GLB2|GSL|NGBE|PPCA|PPGB	20	20q13.1
NPM3		10360	NPM3	nucleophosmin/nucleoplasmin 3	PORMIN|TMEM123	10	10q24.31
CFP		5199	CFP	complement factor properdin	BFD|PFC|PFD|PROPERDIN	X	Xp11.4
PSAT1		29968	PSAT1	phosphoserine aminotransferase 1	EPIP|NLS2|PSA|PSAT|PSATD	9	9q21.2
MCM4		4173	MCM4	minichromosome maintenance complex component 4	CDC21|CDC54|NKCD|NKGCD|P1-CDC21|hCdc21	8	8q11.2
HPSE		10855	HPSE	heparanase	HPA|HPA1|HPR1|HPSE1|HSE1	4	4q21.3
HSPA13		6782	HSPA13	heat shock protein 70kDa family, member 13	STCH	21	21q11
LRP1		4035	LRP1	low density lipoprotein receptor-related protein 1	A2MR|APOER|APR|CD91|IGFBP3R|LRP|LRP1A|TGFBR5	12	12q13.3
KRT77		374454	KRT77	keratin 77, type II	K1B|KRT1B	12	12q13.13
GNS		2799	GNS	glucosamine (N-acetyl)-6-sulfatase	G6S	12	12q14
VPS13A		23230	VPS13A	vacuolar protein sorting 13 homolog A (S. cerevisiae)	CHAC|CHOREIN	9	9q21
C3		718	C3	complement component 3	AHUS5|ARMD9|ASP|C3a|C3b|CPAMD1|HEL-S-62p	19	19p13.3-p13.2
IL1B		3553	IL1B	interleukin 1, beta	IL-1|IL1-BETA|IL1F2	2	2q14
CTSH		1512	CTSH	cathepsin H	ACC-4|ACC-5|ACC4|ACC5|CPSB|minichain	15	15q25.1
ST8SIA4		7903	ST8SIA4	ST8 alpha-N-acetyl-neuraminide alpha-2,8-sialyltransferase 4	PST|PST1|SIAT8D|ST8SIA-IV	5	5q21
SLC7A1		6541	SLC7A1	solute carrier family 7 (cationic amino acid transporter, y+ system), member 1	ATRC1|CAT-1|ERR|HCAT1|REC1L	13	13q12.3
GLA		2717	GLA	galactosidase, alpha	GALA	X	Xq22
SCPEP1		59342	SCPEP1	serine carboxypeptidase 1	HSCP1|RISC	17	17q22
LIPA		3988	LIPA	lipase A, lysosomal acid, cholesterol esterase	CESD|LAL	10	10q23.2-q23.3
ANG		283	ANG	angiogenin, ribonuclease, RNase A family, 5	ALS9|HEL168|RAA1|RNASE4|RNASE5	14	14q11.1-q11.2
TPP1		1200	TPP1	tripeptidyl peptidase I	CLN2|GIG1|LPIC|SCAR7|TPP-1	11	11p15
GGH		8836	GGH	gamma-glutamyl hydrolase (conjugase, folylpolygammaglutamyl hydrolase)	GH	8	8q12.3
NUB1		51667	NUB1	negative regulator of ubiquitin-like proteins 1	BS4|NUB1L|NYREN18	7	7q36
NEU1		4758	NEU1	sialidase 1 (lysosomal sialidase)	NANH|NEU|SIAL1	6	6p21.3
RBM3		5935	RBM3	RNA binding motif (RNP1, RRM) protein 3	IS1-RNPL|RNPL	X	Xp11.2
TPT1		7178	TPT1	tumor protein, translationally-controlled 1	HRF|TCTP|p02|p23	13	13q14
MIF		4282	MIF	macrophage migration inhibitory factor (glycosylation-inhibiting factor)	GIF|GLIF|MMIF	22	22q11.23
CTSD		1509	CTSD	cathepsin D	CLN10|CPSD|HEL-S-130P	11	11p15.5
IQCE		23288	IQCE	IQ motif containing E	1700028P05Rik	7	7p22.3
FYN		2534	FYN	FYN proto-oncogene, Src family tyrosine kinase	SLK|SYN|p59-FYN	6	6q21
CD320		51293	CD320	CD320 molecule	8D6|8D6A|TCBLR	19	19p13.3-p13.2
CTSC		1075	CTSC	cathepsin C	CPPI|DPP-I|DPP1|DPPI|HMS|JP|JPD|PALS|PDON1|PLS	11	11q14.2
HEXA		3073	HEXA	hexosaminidase A (alpha polypeptide)	TSD	15	15q24.1
FASN		2194	FASN	fatty acid synthase	FAS|OA-519|SDR27X1	17	17q25
GUCY1B3		2983	GUCY1B3	guanylate cyclase 1, soluble, beta 3	GC-S-beta-1|GC-SB3|GUC1B3|GUCB3|GUCSB3|GUCY1B1	4	4q31.3-q33
THBS3		7059	THBS3	thrombospondin 3	TSP3	1	1q21
KRT10		3858	KRT10	keratin 10, type I	BCIE|BIE|CK10|EHK|K10|KPP	17	17q21
MERTK		10461	MERTK	MER proto-oncogene, tyrosine kinase	MER|RP38|Tyro12|c-Eyk|c-mer	2	2q14.1
NAGA		4668	NAGA	N-acetylgalactosaminidase, alpha-	D22S674|GALB	22	22q11
PIK3AP1		118788	PIK3AP1	phosphoinositide-3-kinase adaptor protein 1	BCAP	10	10q24.1
NCAPG2		54892	NCAPG2	non-SMC condensin II complex, subunit G2	CAP-G2|CAPG2|LUZP5|MTB|hCAP-G2	7	7q36.3
LRP5		4041	LRP5	low density lipoprotein receptor-related protein 5	BMND1|EVR1|EVR4|HBM|LR3|LRP-5|LRP7|OPPG|OPS|OPTA1|VBCH2	11	11q13.4
NDRG3		57446	NDRG3	NDRG family member 3	-	20	20q11.21-q11.23
SRM		6723	SRM	spermidine synthase	PAPT|SPDSY|SPS1|SRML1	1	1p36-p22
SLC44A1		23446	SLC44A1	solute carrier family 44 (choline transporter), member 1	CD92|CDW92|CHTL1|CTL1	9	9q31.2

## Sheet: Cellular component
Analysis: Cellular component
Dataset name: BanLecsecretomep005
Number of genes in the dataset: 217
Number of genes in the dataset (which are available in Cellular component database) :206
Number of genes in background: 14553
Is analysis quantitative: No
						Corrected p-values
Cellular component	No. of genes in the dataset	No. of genes in the background dataset	Percentage of genes	Fold enrichment	P-value (Hypergeometric test)	Bonferroni method	BH method	Q-value (Storey-Tibshirani method)	genes mapped (from input data set)
Lysosome	53	1620	25.7282	2.31156	3.09697e-09	2.42802e-06	2.42802e-06	1.45588e-05	ADPGK; APPL2; ATP2B4; CLN5; EFR3A; GLRX; GORASP2; KIAA1033; M6PR; NCKAP1; PI4KA; RAB3D; RAC1; SLC2A1; SLC31A1; SMPD1; TSG101; TUBA1C; ESYT2; ITIH4; JUP; NAAA; CST7; FOLR1; MRC1; FAM129B; BID; AOAH; STAB1; C4BPA; CTSS; PPP3R1; RALB; SLC1A5; GM2A; PLBD2; CTSA; HPSE; LRP1; GNS; CTSH; SLC7A1; GLA; LIPA; TPP1; GGH; NEU1; TPT1; CTSD; CTSC; HEXA; NAGA; SLC44A1;
Extracellular	56	1825	27.1845	2.16803	9.84651e-09	7.71966e-06	3.85983e-06	2.31442e-05	CD27; CLN5; GZMA; IFNG; IL18; IL2; LIF; LRPAP1; LTA; MMP8; OSM; SEMA3F; SEMA4D; SMPD1; CXCL10; MSH2; ITIH4; JUP; OLFML2B; TCN2; TGFBI; CD69; C1QB; C1QA; MMP12; CST7; CSF3; XCL2; KRT18; PHGDH; CCL5; TIMP2; AOAH; STAB1; CFD; C4BPA; CTSS; LIPG; GM2A; RNASE6; KRT8; CTSA; CFP; LRP1; C3; IL1B; ST8SIA4; SCPEP1; ANG; GGH; TPT1; MIF; CTSD; CTSC; THBS3; NAGA;
Intermediate filament	6	36	2.91262	11.7901	1.02225e-05	0.00801445	0.00267148	0.0160186	GFAP; KRT18; KRT5; KRT1; KRT8; KRT10;
Extracellular region	19	442	9.2233	3.03819	1.71957e-05	0.0134814	0.00337036	0.0202092	CD27; IL18; CXCL10; ITIH4; C1QB; C1QA; SMPDL3A; CCL5; CFD; C4BPA; CTSS; RNASE6; CFP; C3; IL1B; GLA; MIF; CTSD; THBS3;
Exosomes	51	2043	24.7573	1.7638	2.67505e-05	0.0209724	0.00419447	0.0251507	APPL2; ATP2B4; GLRX; NCKAP1; PI4KA; PMVK; RAB3D; RAC1; SLC2A1; TSG101; TUBA1C; XRCC6; ITIH4; JUP; TGFBI; C1QB; FOLR1; SLC29A1; KRT18; PHGDH; FAM129B; KRT5; KRT75; KRT79; OXSR1; KRT1; ASNS; CFD; C4BPA; RALB; SLC1A5; GM2A; KRT8; CTSA; PSAT1; HSPA13; LRP1; KRT77; C3; SCPEP1; TPP1; GGH; NEU1; RBM3; MIF; CTSD; CTSC; FASN; KRT10; NDRG3; SLC44A1;
Immunological synapse	3	7	1.45631	30.3328	9.38201e-05	0.0735549	0.0122592	0.0735078	GZMA; LAT; GZMB;
Complement component C1 complex	2	2	0.970874	70.6423	0.00019941	0.156337	0.0223339	0.133917	C1QB; C1QA;
Multivesicular body	2	4	0.970874	35.4092	0.00117421	0.92058	0.115072	0.689993	TSG101; TPT1;
Plasma membrane	53	3479	25.7282	1.07638	0.292815	1	1	1	ARL6IP1; ATP2B4; CD226; CD27; CLEC1B; F2RL3; LRPAP1; LTA; M6PR; PPP1R16B; PRF1; RAB3D; RAC1; RPS6KA1; SEMA3F; SEMA4D; SIGLEC5; SLC2A1; SLC31A1; SMPD1; TNFRSF18; TNFRSF4; TSG101; LAT; ICOS; IL2RA; LAG3; CD300C; JUP; NOTCH2; SYTL4; LIMD1; CD69; FOLR1; MRC1; SLC29A1; KRT1; STAB1; CTSS; PPP3R1; RALB; SLC1A5; LRP1; IL1B; ST8SIA4; SLC7A1; GGH; NEU1; TPT1; FYN; CD320; MERTK; LRP5;
Integral to membrane	9	1702	4.36893	0.373962	0.999936	1	1	1	CHST11; CLN5; LRPAP1; TSPAN5; LAT; ICOS; OXSR1; LRP5; SLC44A1;
Integral to plasma membrane	19	934	9.2233	1.43779	0.0707705	1	1	1	ATP2B4; CD226; CD27; CLEC1B; F2RL3; M6PR; SLC31A1; TNFRSF4; CD300C; NOTCH2; CD69; FOLR1; MRC1; SLC29A1; STAB1; SLC1A5; LRP1; SLC7A1; MERTK;
Golgi aparatus	22	897	10.6796	1.73335	0.00839271	1	0.504438	1	BICD2; CHST11; CLN5; GORASP2; LRPAP1; M6PR; PI4KA; SLC2A1; SLC31A1; TSG101; NOTCH2; C1QA; MRC1; CTSS; B4GALT5; CTSA; HPSE; LRP1; ST8SIA4; GLA; CTSD; FASN;
Nucleus	79	5847	38.3495	0.954581	0.72823	1	1	1	ADPGK; APPL2; ATP2B4; ATRX; BICD2; CDK6; EXOSC5; FBXO7; FGFR1OP; GORASP2; GZMA; HDAC3; HNRNPH3; IFNG; IPO11; LRPAP1; NUP62; PAF1; PNKP; POLE3; PPP1R16B; RANGRF; RECQL; RNMT; RPS6KA1; SEMA4D; SHOC2; SP100; SRSF12; THOC2; TNPO2; TOP2A; TRMT1; TSG101; TUBA1C; WBSCR22; WDR4; XRCC6; ZFP36L1; CCDC9; DCK; MSH2; NCBP2; SDE2; GZMB; CREM; JUP; NOTCH2; LIMD1; SPEG; ZNF662; HDAC4; GZMH; TGFBI; KRT18; CCL5; F…
Perinuclear region of cytoplasm	3	119	1.45631	1.78668	0.237721	1	1	1	CLN5; FGFR1OP; THBS3;
Ribonucleoprotein complex	1	65	0.485437	1.0975	0.60494	1	1	1	NUP62;
Heterogeneous nuclear ribonucleoprotein complex	1	17	0.485437	4.19451	0.215329	1	1	1	HNRNPH3;
Nucleolus	23	1257	11.165	1.29313	0.121785	1	1	1	ATRX; EXOSC5; HNRNPH3; PNKP; RECQL; SP100; SRP72; TOP2A; TSG101; WBSCR22; XRCC6; ZNF706; POLR1C; JUP; KRT18; KRT8; NPM3; MCM4; ANG; RBM3; TPT1; KRT10; NCAPG2;
Mitochondrion	16	1259	7.76699	0.898311	0.711125	1	1	1	ACSL5; HNRNPH3; NCKAP1; RECQL; SUCLG1; THOC2; TRMT1; ESYT2; GCDH; BID; CTSH; TPT1; CTSD; IQCE; CTSC; FASN;
Cytosol	18	1178	8.73786	1.08001	0.403	1	1	1	FGFR1OP; GLRX; PFKFB3; RAC1; RPS6KA1; SRP72; NCBP2; GZMB; IDO1; PHGDH; KRT5; BID; ASNS; PPP3R1; PSAT1; FYN; FASN; SRM;
Membrane fraction	10	346	4.85437	2.04367	0.0257049	1	0.667847	1	PI4KA; RAC1; RPS6KA1; SLC2A1; XRCC6; FOLR1; SLC29A1; BID; SLC1A5; LRP1;
Cytoplasm	98	5684	47.5728	1.21809	0.00752869	1	0.491874	1	ADPGK; APPL2; ARL6IP1; ATP2B4; ATRX; BICD2; CDK6; EXOSC5; FBXO7; GLRX; GORASP2; GZMA; HDAC3; HEATR5B; IL18; IPO11; LRPAP1; LRRC47; LTA; NCKAP1; NUP62; PI4KA; PMVK; PRF1; PRPSAP1; RAB3D; RAC1; RANGRF; RNMT; RPS6KA1; SEMA3F; SHOC2; SLC2A1; SP100; SRP72; THOC2; TNPO2; TOP2A; TSG101; TUBA1C; WDR4; XRCC6; CCDC9; CLUH; DCK; NCBP2; PPP2R5B; PRICKLE2; IL2RA; GZMB; ARHGAP18; JUP; NAAA; PPP1R14A; CAMSAP3; …
Midbody	1	19	0.485437	3.75322	0.237413	1	1	1	RALB;
Oncostatin-M receptor complex	1	3	0.485437	23.7039	0.04187	1	0.863845	1	OSM;
Endoplasmic reticulum	21	1104	10.1942	1.34437	0.101655	1	1	1	CLN5; LRPAP1; NUP62; SLC31A1; SMPD1; FKBP9; NOTCH2; MRC1; CTSW; STAB1; OLFM1; CTSS; CTSA; HPSE; HSPA13; LRP1; CTSH; GLA; NEU1; CTSD; CD320;
Secretory granule	2	50	0.970874	2.83925	0.157584	1	1	1	RAB3D; SYTL4;
Endosome	10	303	4.85437	2.33368	0.0112135	1	0.504438	1	APPL2; LRPAP1; M6PR; LAT; GZMH; STAB1; CTSS; LRP1; C3; FYN;
Cell surface	6	205	2.91262	2.07092	0.0715348	1	1	1	CD226; M6PR; TNFRSF18; NOTCH2; CD69; MIF;
Kinetochore	3	90	1.45631	2.36233	0.135227	1	1	1	TOP2A; NUP85; SMARCC1;
Nuclear pore	1	42	0.485437	1.69837	0.450977	1	1	1	NUP62;
Membrane	9	350	4.36893	1.81848	0.0614411	1	1	1	ATP2B4; SLC2A1; ESYT2; TGFBI; KRT1; SLC1A5; LRP1; TPP1; SLC44A1;
PML body	1	37	0.485437	1.92782	0.4103	1	1	1	SP100;
mRNA cap binding complex	1	5	0.485437	14.2413	0.0688095	1	1	1	NCBP2;
Extracellular space	13	404	6.31068	2.27483	0.00502878	1	0.394256	1	IL2; MMP8; OSM; SEMA3F; TCN2; TGFBI; CSF3; LIPG; CFP; IL1B; ANG; TPT1; CTSD;
Extracellular matrix	3	120	1.45631	1.7718	0.241489	1	1	1	TGFBI; CFP; CTSD;
Ubiquitin ligase complex	1	43	0.485437	1.65889	0.458771	1	1	1	FBXO7;
Nucleoplasm	11	449	5.33981	1.73219	0.0548655	1	1	1	RNMT; RPS6KA1; SP100; TNPO2; TOP2A; WDR4; XRCC6; NCBP2; POLR1C; SMARCC1; MCM4;
Centrosome	17	656	8.25243	1.83172	0.012004	1	0.504438	1	BICD2; CDK6; FGFR1OP; NUP62; SRP72; TSG101; XRCC6; NUP85; PHGDH; KRT5; KRT1; ASNS; CEP128; PSAT1; MCM4; FASN; KRT10;
Soluble fraction	3	180	1.45631	1.18123	0.470262	1	1	1	ASNS; TPP1; MERTK;
Nuclear envelope	2	71	0.970874	1.99959	0.266084	1	1	1	NUP62; NUP85;
Cytoskeleton	10	427	4.85437	1.656	0.0824312	1	1	1	JUP; KRT18; KRT5; KRT79; KRT1; KRT8; KRT77; VPS13A; TPT1; KRT10;
Intracellular	1	151	0.485437	0.472476	0.88513	1	1	1	VPS13A;
Cell-cell junction	1	38	0.485437	1.8771	0.418668	1	1	1	JUP;
Platelet alpha granule lumen	2	35	0.970874	4.05572	0.087534	1	1	1	CFD; THBS3;
Microtubule	2	129	0.970874	1.10062	0.547662	1	1	1	BICD2; TUBA1C;
Ruffle	1	24	0.485437	2.97162	0.289953	1	1	1	CDK6;
Endosome membrane	1	27	0.485437	2.64157	0.319731	1	1	1	APPL2;
Centriolar satellite	1	8	0.485437	8.90745	0.107812	1	1	1	KRT18;
Protein complex	2	65	0.970874	2.18414	0.23458	1	1	1	FBXO7; TOP2A;
Transcription factor complex	1	43	0.485437	1.65889	0.458771	1	1	1	XRCC6;
Nuclear membrane	1	78	0.485437	0.914609	0.672073	1	1	1	NUP62;
Late endosome	1	40	0.485437	1.78327	0.435053	1	1	1	TSG101;
Histone deacetylase complex	2	21	0.970874	6.75825	0.0350978	1	0.78619	1	HDAC3; HDAC4;
Mitochondrial outer membrane	1	29	0.485437	2.45945	0.338889	1	1	1	BID;
Microsome	2	156	0.970874	0.91014	0.651086	1	1	1	HSPA13; CTSH;
Intracellular membrane-bounded organelle	5	127	2.42718	2.78653	0.0344272	1	0.78619	1	NUP62; GZMB; ITIH4; CTSS; CTSH;
Cell junction	1	38	0.485437	1.8771	0.418668	1	1	1	JUP;
Lysosomal membrane	1	14	0.485437	5.0927	0.181006	1	1	1	CLN5;
Membrane raft	2	36	0.970874	3.9431	0.0918501	1	1	1	CD226; LAT;
Centriole	1	22	0.485437	3.24165	0.269384	1	1	1	TOP2A;
Peroxisome	1	111	0.485437	0.642723	0.795769	1	1	1	PMVK;
THO complex part of transcription export complex	1	5	0.485437	14.2413	0.0688095	1	1	1	THOC2;
Calcineurin complex	1	2	0.485437	35.4969	0.0281109	1	0.667847	1	PPP3R1;
Cell-cell adherens junction	1	13	0.485437	5.48414	0.169235	1	1	1	JUP;
Transcriptional repressor complex	2	17	0.970874	8.3475	0.0235831	1	0.667847	1	HDAC3; HDAC4;
Early endosome	1	69	0.485437	1.03389	0.626936	1	1	1	TSG101;
Signal recognition particle, endoplasmic reticulum targeting	1	6	0.485437	11.8717	0.0819951	1	1	1	SRP72;
Spindle microtubule	1	24	0.485437	2.97162	0.289953	1	1	1	HDAC3;
Cytoplasmic vesicle	2	160	0.970874	0.887388	0.664709	1	1	1	M6PR; CST7;
Pore complex	1	3	0.485437	23.7039	0.04187	1	0.863845	1	NUP62;
Cyclin-dependent protein kinase holoenzyme complex	1	7	0.485437	10.1781	0.094995	1	1	1	CDK6;
Zonula adherens	1	4	0.485437	17.7927	0.0554353	1	1	1	CAMSAP3;
Chromosome	2	59	0.970874	2.40622	0.203328	1	1	1	PPP2R5B; MCM4;
Golgi-associated vesicle	1	6	0.485437	11.8717	0.0819951	1	1	1	PI4KA;
Cdc73/Paf1 complex	1	4	0.485437	17.7927	0.0554353	1	1	1	PAF1;
Others	4	51	1.94175	5.55333	0.00579644	1	0.413128	1	SYTL4; CST7; STAB1; CTSS;
SWI/SNF-type complex	1	6	0.485437	11.8717	0.0819951	1	1	1	SMARCC1;
SWI/SNF complex	1	13	0.485437	5.48414	0.169235	1	1	1	SMARCC1;
Nuclear chromosome	1	17	0.485437	4.19451	0.215329	1	1	1	TOP2A;
Nucleocytoplasmic shuttling complex	1	1	0.485437	70.6423	0.0141552	1	0.504438	1	NUP62;
Protein-DNA complex	1	5	0.485437	14.2413	0.0688095	1	1	1	JUP;
Nonhomologous end joining complex	1	6	0.485437	11.8717	0.0819951	1	1	1	XRCC6;
Catenin complex	1	7	0.485437	10.1781	0.094995	1	1	1	JUP;
Ku70:Ku80 complex	1	2	0.485437	35.4969	0.0281109	1	0.667847	1	XRCC6;
THO complex	1	5	0.485437	14.2413	0.0688095	1	1	1	THOC2;
NuRD complex	1	12	0.485437	5.94077	0.157297	1	1	1	APPL2;
Nuclear telomere cap complex	1	8	0.485437	8.90745	0.107812	1	1	1	XRCC6;
Tubulin complex	1	2	0.485437	35.4969	0.0281109	1	0.667847	1	TPT1;
Nuclear heterochromatin	1	5	0.485437	14.2413	0.0688095	1	1	1	ATRX;
Basal lamina	1	7	0.485437	10.1781	0.094995	1	1	1	ANG;
Ribonucleoside-diphosphate reductase complex	1	1	0.485437	70.6423	0.0141552	1	0.504438	1	RRM1;
Protein phosphatase type 1 complex	1	2	0.485437	35.4969	0.0281109	1	0.667847	1	SHOC2;
Transcription export complex	1	8	0.485437	8.90745	0.107812	1	1	1	THOC2;
Desmosome	1	11	0.485437	6.48035	0.145188	1	1	1	JUP;
Catenin-TCF7L2 complex	1	1	0.485437	70.6423	0.0141552	1	0.504438	1	JUP;
Guanylate cyclase complex, soluble	1	2	0.485437	35.4969	0.0281109	1	0.667847	1	GUCY1B3;
Zymogen granule	3	34	1.45631	6.25208	0.0121138	1	0.504438	1	RAB3D; RAC1; SMPDL3A;
WASH complex	1	7	0.485437	10.1781	0.094995	1	1	1	KIAA1033;
DNA-directed RNA polymerase I complex	1	2	0.485437	35.4969	0.0281109	1	0.667847	1	POLR1C;
Cell projection	1	41	0.485437	1.73979	0.443072	1	1	1	RAC1;
Nup107-160 complex	1	10	0.485437	7.12774	0.132906	1	1	1	NUP85;
MutSbeta complex	1	2	0.485437	35.4969	0.0281109	1	0.667847	1	MSH2;
Microtubule organizing center	1	10	0.485437	7.12774	0.132906	1	1	1	KRT18;
MutSalpha complex	1	2	0.485437	35.4969	0.0281109	1	0.667847	1	MSH2;
Keratin filament	2	5	0.970874	28.3415	0.00193876	1	0.168888	1	KRT18; KRT5;
Basolateral membrane	1	9	0.485437	7.91883	0.120448	1	1	1	ATP2B4;
DNA topoisomerase complex (ATP-hydrolyzing)	1	1	0.485437	70.6423	0.0141552	1	0.504438	1	TOP2A;
Angiogenin-PRI complex	1	2	0.485437	35.4969	0.0281109	1	0.667847	1	ANG;
Viral integration complex	1	1	0.485437	70.6423	0.0141552	1	0.504438	1	TOP2A;
Nuclear periphery	1	3	0.485437	23.7039	0.04187	1	0.863845	1	SP100;
Gamma-catenin-TCF7L2 complex	1	1	0.485437	70.6423	0.0141552	1	0.504438	1	JUP;

## Sheet: Molecular function
Analysis: Molecular function
Dataset name: BanLecsecretomep005
Number of genes in the dataset: 217
Number of genes in the dataset (which are available in Molecular function database) :216
Number of genes in background: 18125
Is analysis quantitative: No
						Corrected p-values
Molecular function	No. of genes in the dataset	No. of genes in the background dataset	Percentage of genes	Fold enrichment	P-value (Hypergeometric test)	Bonferroni method	BH method	Q-value (Storey-Tibshirani method)	genes mapped (from input data set)
Complement activity	5	28	2.31481	15.0082	1.8038e-05	0.00404052	0.00404052	0.0212049	C1QB; C1QA; C4BPA; CFP; C3;
Cytokine activity	8	107	3.7037	6.28077	4.23775e-05	0.00949256	0.00474628	0.0249088	IFNG; IL18; IL2; LIF; OSM; CSF3; IL1B; MIF;
Receptor activity	13	361	6.01852	3.02387	0.000410148	0.0918732	0.0306244	0.160719	CD27; CLEC1B; M6PR; TNFRSF18; TNFRSF4; ICOS; NOTCH2; CD69; FOLR1; MRC1; STAB1; LRP1; LRP5;
Serine-type peptidase activity	6	98	2.77778	5.14527	0.0011312	0.253388	0.0633471	0.33245	GZMA; GZMB; GZMH; CFD; CTSA; TPP1;
Cysteine-type peptidase activity	4	46	1.85185	7.31302	0.00216345	0.484613	0.0969226	0.508656	CTSW; CTSS; CTSH; CTSC;
Chemokine activity	4	53	1.85185	6.34733	0.00363884	0.815101	0.13585	0.712951	LTA; CXCL10; XCL2; CCL5;
Molecular function unknown	34	5685	15.7407	0.501972	1	1	1	1	APPL2; CLN5; CNOT10; EFR3A; FAM45A; FGFR1OP; HEATR5B; KIAA1033; LRRC47; NUDCD1; PAF1; TSPAN5; URM1; WDR4; CCDC9; DXO; PRICKLE2; SDE2; LAG3; ESYT2; OLFML2B; CAMSAP3; LDLRAD2; SPEG; FAM129B; OLFM1; CEP128; NPL; PLBD2; IQCE; CD320; NCAPG2; NDRG3; SLC44A1;
Protease inhibitor activity	2	94	0.925926	1.79402	0.308731	1	1	1	ITIH4; CST7;
Cell adhesion molecule activity	3	356	1.38889	0.709429	0.799922	1	1	1	CD226; SIGLEC5; JUP;
Ligase activity	3	112	1.38889	2.25483	0.149523	1	1	1	ACSL5; SUCLG1; ASNS;
Transaminase activity	1	23	0.462963	3.68306	0.24112	1	1	1	PSAT1;
Transporter activity	11	576	5.09259	1.60384	0.0845362	1	0.860732	1	GORASP2; IPO11; NUP62; PRF1; RANGRF; SLC31A1; TNPO2; SYTL4; TCN2; GM2A; VPS13A;
Translation regulator activity	1	101	0.462963	0.838999	0.703066	1	1	1	CLUH;
ATPase activity	1	111	0.462963	0.76342	0.736799	1	1	1	ATP2B4;
Protein-tyrosine kinase activity	1	38	0.462963	2.2296	0.366214	1	1	1	FYN;
Catalytic activity	9	532	4.16667	1.42105	0.185761	1	1	1	DCK; GCDH; SMPDL3A; IDO1; PHGDH; HPSE; GNS; FASN; NAGA;
Transferase activity	2	156	0.925926	1.08106	0.557072	1	1	1	ST8SIA4; SRM;
GTPase activator activity	1	144	0.462963	0.588482	0.823296	1	1	1	ARHGAP18;
Oxidoreductase activity	3	161	1.38889	1.56862	0.301073	1	1	1	DOHH; GLRX; RRM1;
Hydrolase activity	6	203	2.77778	2.48406	0.0350125	1	0.560201	1	SMPD1; NAAA; AOAH; GGH; NEU1; HEXA;
Receptor binding	4	129	1.85185	2.60811	0.0685893	1	0.818378	1	SEMA3F; SEMA4D; TGFBI; BID;
Structural molecule activity	8	269	3.7037	2.49844	0.015593	1	0.349283	1	GFAP; KRT5; KRT75; KRT79; KRT1; KRT8; KRT77; KRT10;
Structural constituent of cytoskeleton	2	137	0.925926	1.23097	0.487521	1	1	1	TUBA1C; KRT18;
Metallopeptidase activity	2	101	0.925926	1.66969	0.339321	1	1	1	MMP8; MMP12;
G-protein coupled receptor activity	1	736	0.462963	0.115144	0.999878	1	1	1	F2RL3;
Cytoskeletal anchoring activity	1	39	0.462963	2.17245	0.373783	1	1	1	NUP85;
Protein serine/threonine kinase activity	2	301	0.925926	0.560299	0.876698	1	1	1	RPS6KA1; OXSR1;
Transcription regulator activity	5	832	2.31481	0.505258	0.97244	1	1	1	ATRX; HDAC3; SP100; LIMD1; HDAC4;
Extracellular matrix structural constituent	2	166	0.925926	1.01594	0.590907	1	1	1	TIMP2; THBS3;
Transcription factor activity	4	842	1.85185	0.399606	0.991379	1	1	1	THOC2; ZFP36L1; CREM; SMARCC1;
Receptor signaling complex scaffold activity	3	322	1.38889	0.784335	0.741432	1	1	1	SHOC2; LAT; PIK3AP1;
Calcium ion binding	1	185	0.462963	0.458069	0.8924	1	1	1	TPT1;
Hydro-lyase activity	1	7	0.462963	12.0895	0.0805096	1	0.85877	1	SDS;
Transmembrane receptor protein tyrosine kinase activity	1	56	0.462963	1.51307	0.489518	1	1	1	MERTK;
Lipase activity	2	19	0.925926	8.87193	0.0211571	1	0.394932	1	LIPG; LIPA;
Ubiquitin-specific protease activity	3	377	1.38889	0.669912	0.830231	1	1	1	FBXO7; TSG101; NUB1;
Ribonuclease activity	3	48	1.38889	5.26065	0.0194813	1	0.394932	1	EXOSC5; RNASE6; ANG;
DNA repair protein	3	57	1.38889	4.43016	0.0305018	1	0.525569	1	PNKP; RECQL; MSH2;
Protein binding	4	182	1.85185	1.84865	0.172769	1	1	1	BICD2; CDK6; NCKAP1; PPP1R16B;
RNA binding	5	366	2.31481	1.14855	0.442566	1	1	1	SRP72; SRSF12; NCBP2; RBM47; RBM3;
GTPase activity	5	222	2.31481	1.89352	0.126705	1	1	1	GIMAP8; RAB3D; RAC1; RALB; GBP2;
Methyltransferase activity	2	59	0.925926	2.85808	0.156086	1	1	1	WBSCR22; SRM;
DNA binding	5	654	2.31481	0.642773	0.893729	1	1	1	POLE3; XRCC6; ZNF706; ZNF662; MCM4;
Chaperone activity	4	126	1.85185	2.6702	0.0640515	1	0.818378	1	LRPAP1; FKBP9; NPM3; HSPA13;
Auxiliary transport protein activity	5	333	2.31481	1.26236	0.364873	1	1	1	ARL6IP1; SLC2A1; SLC29A1; SLC1A5; SLC7A1;
DNA-directed RNA polymerase activity	1	29	0.462963	2.92131	0.293863	1	1	1	POLR1C;
Antigen binding	1	42	0.462963	2.01731	0.395954	1	1	1	CD300C;
Phosphatase regulator activity	1	16	0.462963	5.2934	0.174611	1	1	1	PPP3R1;
Lipid kinase activity	2	35	0.925926	4.81735	0.0650686	1	0.818378	1	PI4KA; PMVK;
Carboxypeptidase activity	1	21	0.462963	4.03366	0.222681	1	1	1	SCPEP1;
Enzyme regulator activity	2	13	0.925926	12.9635	0.010113	1	0.283164	1	PRPSAP1; PPP1R14A;
Transmembrane receptor activity	1	52	0.462963	1.62944	0.464365	1	1	1	IL2RA;
Aspartic-type signal peptidase activity	1	7	0.462963	12.0895	0.0805096	1	0.85877	1	CTSD;
Galactosyltransferase activity	1	38	0.462963	2.2296	0.366214	1	1	1	B4GALT5;
Ribonucleoprotein	1	41	0.462963	2.0665	0.388652	1	1	1	HNRNPH3;
Phosphorylase activity	1	20	0.462963	4.23525	0.213296	1	1	1	ADPGK;
Galactosidase activity	1	1	0.462963	83.9082	0.0119172	1	0.296607	1	GLA;
Guanylate cyclase activity	1	8	0.462963	10.5802	0.0914717	1	0.890854	1	GUCY1B3;
Sulfotransferase activity	1	53	0.462963	1.5987	0.470767	1	1	1	CHST11;
RNA methyltransferase activity	2	12	0.925926	14.0429	0.0086244	1	0.275981	1	RNMT; TRMT1;
Sugar-phosphatase activity	1	4	0.462963	21.134	0.0468274	1	0.699289	1	PFKFB3;
Protein serine/threonine phosphatase activity	1	44	0.462963	1.92564	0.410298	1	1	1	PPP2R5B;
DNA topoisomerase activity	1	6	0.462963	14.101	0.069416	1	0.818378	1	TOP2A;

## Sheet: Biological process
Analysis: Biological process
Dataset name: BanLecsecretomep005
Number of genes in the dataset: 217
Number of genes in the dataset (which are available in Biological process database) :216
Number of genes in background: 18124
Is analysis quantitative: No
						Corrected p-values
Biological process	No. of genes in the dataset	No. of genes in the background dataset	Percentage of genes	Fold enrichment	P-value (Hypergeometric test)	Bonferroni method	BH method	Q-value (Storey-Tibshirani method)	genes mapped (from input data set)
Immune response	21	576	9.72222	3.06039	5.74702e-06	0.00102297	0.00102297	0.00636273	CD226; CD27; IFNG; IL18; IL2; CXCL10; LAT; ICOS; IL2RA; LAG3; CD300C; CD69; C1QB; C1QA; CSF3; AOAH; CFD; C4BPA; CFP; C3; IL1B;
Protein metabolism	27	1323	12.5	1.71294	0.00429846	0.765125	0.381767	1	FBXO7; GZMA; LRPAP1; M6PR; MMP8; SRP72; TSG101; CLUH; FKBP9; GZMB; ITIH4; GZMH; MMP12; CST7; CTSW; ASNS; CTSS; CTSA; NPM3; HSPA13; VPS13A; CTSH; SCPEP1; TPP1; NUB1; CTSD; CTSC;
Biological_process unknown	26	4731	12.037	0.461282	1	1	1	1	CLN5; CNOT10; EFR3A; FAM45A; HEATR5B; KIAA1033; LIF; LRRC47; NUDCD1; PAF1; TSPAN5; URM1; WDR4; CCDC9; DXO; PRICKLE2; SDE2; ESYT2; OLFML2B; CAMSAP3; LDLRAD2; FAM129B; OLFM1; CEP128; PLBD2; IQCE;
Metabolism	31	1683	14.3519	1.54595	0.0097696	1	0.424277	1	ACSL5; ADPGK; CHST11; GLRX; PFKFB3; PMVK; PRPSAP1; SUCLG1; WBSCR22; NAAA; GCDH; SMPDL3A; IDO1; PHGDH; LIPG; GM2A; SDS; B4GALT5; NPL; PSAT1; HPSE; GNS; ST8SIA4; GLA; LIPA; GGH; NEU1; HEXA; FASN; NAGA; SRM;
Energy pathways	31	1633	14.3519	1.59328	0.00643427	1	0.381767	1	ACSL5; ADPGK; CHST11; GLRX; PFKFB3; PMVK; PRPSAP1; SUCLG1; WBSCR22; NAAA; GCDH; SMPDL3A; IDO1; PHGDH; LIPG; GM2A; SDS; B4GALT5; NPL; PSAT1; HPSE; GNS; ST8SIA4; GLA; LIPA; GGH; NEU1; HEXA; FASN; NAGA; SRM;
Cell growth and/or maintenance	17	1125	7.87037	1.26861	0.187291	1	1	1	FGFR1OP; TUBA1C; NUP85; SPEG; GFAP; KRT18; TIMP2; KRT5; KRT75; KRT79; KRT1; KRT8; KRT77; TPT1; THBS3; KRT10; NCAPG2;
Transport	17	1215	7.87037	1.17464	0.281118	1	1	1	ARL6IP1; ATP2B4; GORASP2; NUP62; PRF1; RAB3D; RANGRF; SLC2A1; SLC31A1; TNPO2; SYTL4; TCN2; SLC29A1; SLC1A5; VPS13A; SLC7A1; SLC44A1;
Cell communication	43	3713	19.9074	0.971905	0.610997	1	1	1	APPL2; CDK6; CLEC1B; F2RL3; GIMAP8; IPO11; LTA; NCKAP1; OSM; PI4KA; PPP1R16B; RAC1; RPS6KA1; SEMA3F; SEMA4D; SHOC2; SIGLEC5; TNFRSF18; TNFRSF4; PPP2R5B; ARHGAP18; JUP; NOTCH2; PPP1R14A; TGFBI; FOLR1; MRC1; XCL2; CCL5; OXSR1; STAB1; PPP3R1; RALB; GBP2; LRP1; MIF; FYN; CD320; GUCY1B3; MERTK; PIK3AP1; LRP5; NDRG3;
Signal transduction	44	3934	20.3704	0.938634	0.70931	1	1	1	APPL2; CDK6; CLEC1B; F2RL3; GIMAP8; IPO11; LTA; NCKAP1; OSM; PI4KA; PPP1R16B; RAC1; RPS6KA1; SEMA3F; SEMA4D; SHOC2; SIGLEC5; SMPD1; TNFRSF18; TNFRSF4; PPP2R5B; ARHGAP18; JUP; NOTCH2; PPP1R14A; TGFBI; FOLR1; MRC1; XCL2; CCL5; OXSR1; STAB1; PPP3R1; RALB; GBP2; LRP1; MIF; FYN; CD320; GUCY1B3; MERTK; PIK3AP1; LRP5; NDRG3;
Regulation of nucleobase, nucleoside, nucleotide and nucleic acid metabolism	30	2828	13.8889	0.89036	0.783807	1	1	1	ATRX; EXOSC5; HDAC3; HNRNPH3; PNKP; POLE3; RECQL; RNMT; SP100; SRSF12; THOC2; TOP2A; TRMT1; XRCC6; ZFP36L1; ZNF706; DCK; MSH2; NCBP2; POLR1C; CREM; LIMD1; ZNF662; HDAC4; RRM1; SMARCC1; RNASE6; MCM4; ANG; RBM3;
Vesicle-mediated transport	1	17	0.462963	4.98193	0.184466	1	1	1	BICD2;
Anti-apoptosis	2	32	0.925926	5.26855	0.0555089	1	1	1	NCKAP1; TNFRSF18;
Apoptosis	1	220	0.462963	0.385176	0.92962	1	1	1	BID;
Regulation of gene expression, epigenetic	2	66	0.925926	2.55486	0.185779	1	1	1	RBM47; CREM;
Cell differentiation	2	29	0.925926	5.81338	0.0464968	1	1	1	PAF1; NDRG3;
Protein modification	1	20	0.462963	4.23501	0.213306	1	1	1	DOHH;
Drug metabolism	1	4	0.462963	21.1328	0.0468299	1	1	1	PAF1;
Cell development	1	13	0.462963	6.51365	0.144368	1	1	1	PAF1;
Transcription	1	46	0.462963	1.84183	0.424322	1	1	1	PAF1;
Regulation of metabolism	1	5	0.462963	16.9147	0.0581922	1	1	1	PAF1;
Cell homeostasis	1	1	0.462963	83.9036	0.0119179	1	0.424277	1	PAF1;

## Sheet: Biological pathway
Analysis: Biological pathway
Dataset name: BanLecsecretomep005
Number of genes in the dataset: 217
Number of genes in the dataset (which are available in Biological pathway database) :113
Number of genes in background: 6290
Is analysis quantitative: No
						Corrected p-values
Biological pathway	No. of genes in the dataset	No. of genes in the background dataset	Percentage of genes	Fold enrichment	P-value (Hypergeometric test)	Bonferroni method	BH method	Q-value (Storey-Tibshirani method)	genes mapped (from input data set)
Initial triggering of complement	4	15	3.53982	14.8696	0.000115712	0.193007	0.0616013	0.300309	C1QB; C1QA; CFD; C3;
IL2 signaling events mediated by STAT5	5	28	4.42478	9.95541	0.000120985	0.201803	0.0616013	0.300309	CDK6; IL2; LTA; PRF1; IL2RA;
IL12 signaling mediated by STAT4	5	29	4.42478	9.61224	0.000144111	0.240377	0.0616013	0.300309	IFNG; IL18; IL2; PRF1; IL2RA;
Downstream signaling in na&#xef;ve CD8+ T cells	7	65	6.19469	6.00167	0.000147725	0.246405	0.0616013	0.300309	IFNG; IL2; PRF1; TNFRSF18; TNFRSF4; IL2RA; GZMB;
IL2-mediated signaling events	9	115	7.9646	4.36037	0.000202845	0.338345	0.0676691	0.32989	CDK6; IFNG; IL2; LTA; PRF1; RAC1; SMPD1; IL2RA; FYN;
serine biosynthesis	2	2	1.76991	55.6589	0.000319937	0.533655	0.0889424	0.433599	PHGDH; PSAT1;
TCR signaling in na&#xef;ve CD8+ T cells	9	127	7.9646	3.9484	0.000427228	0.712616	0.101802	0.496291	IFNG; IL2; PRF1; TNFRSF18; TNFRSF4; LAT; IL2RA; GZMB; FYN;
Complement cascade	4	22	3.53982	10.1405	0.000562693	0.938572	0.117322	0.571948	C1QB; C1QA; CFD; C3;
The role of Nef in HIV-1 replication and disease pathogenesis	2	27	1.76991	4.14196	0.0839489	1	0.959087	1	RAC1; FYN;
Nuclear import of Rev protein	2	30	1.76991	3.7279	0.100542	1	1	1	NUP62; NUP85;
Interactions of Rev with host cellular proteins	2	33	1.76991	3.3891	0.117953	1	1	1	NUP62; NUP85;
Nef and signal transduction	2	8	1.76991	13.9668	0.00834606	1	0.207779	1	RAC1; FYN;
Developmental Biology	6	432	5.30973	0.77431	0.798106	1	1	1	HDAC3; RAC1; RPS6KA1; SEMA4D; ST8SIA4; FYN;
Sema4D in semaphorin signaling	2	27	1.76991	4.14196	0.0839489	1	0.959087	1	RAC1; SEMA4D;
Sema4D mediated inhibition of cell attachment and migration	2	8	1.76991	13.9668	0.00834606	1	0.207779	1	RAC1; SEMA4D;
Sema4D induced cell migration and growth-cone collapse	2	22	1.76991	5.08289	0.0585089	1	0.744983	1	RAC1; SEMA4D;
SEMA3A-Plexin repulsion signaling by inhibiting Integrin adhesion	2	14	1.76991	7.98532	0.0252861	1	0.458449	1	RAC1; FYN;
Axon guidance	5	219	4.42478	1.27323	0.357901	1	1	1	RAC1; RPS6KA1; SEMA4D; ST8SIA4; FYN;
Semaphorin interactions	3	64	2.65487	2.6173	0.107247	1	1	1	RAC1; SEMA4D; FYN;
NCAM signaling for neurite out-growth	2	57	1.76991	1.96236	0.27315	1	1	1	ST8SIA4; FYN;
CRMPs in Sema3A signaling	1	16	0.884956	3.51127	0.252038	1	1	1	FYN;
Sema3A PAK dependent Axon repulsion	2	15	1.76991	7.45332	0.0288387	1	0.504959	1	RAC1; FYN;
Signal transduction by L1	2	35	1.76991	3.1955	0.12995	1	1	1	RAC1; RPS6KA1;
Signaling by Robo receptor	1	23	0.884956	2.44309	0.341433	1	1	1	RAC1;
Inactivation of Cdc42 and Rac	1	8	0.884956	7.01816	0.135071	1	1	1	RAC1;
Activation of Rac	1	8	0.884956	7.01816	0.135071	1	1	1	RAC1;
Recycling pathway of L1	1	32	0.884956	1.75618	0.440971	1	1	1	RPS6KA1;
L1CAM interactions	2	79	1.76991	1.41595	0.416972	1	1	1	RAC1; RPS6KA1;
Platelet Adhesion to exposed collagen	1	13	0.884956	4.32094	0.210137	1	1	1	FYN;
Reduction of cytosolic Ca++ levels	1	10	0.884956	5.61593	0.16591	1	1	1	ATP2B4;
Platelet calcium homeostasis	1	16	0.884956	3.51127	0.252038	1	1	1	ATP2B4;
Nitric oxide stimulates guanylate cyclase	1	12	0.884956	4.68072	0.195659	1	1	1	GUCY1B3;
Platelet activation, signaling and aggregation	4	138	3.53982	1.61722	0.235668	1	1	1	F2RL3; RAC1; LAT; FYN;
Transcriptional Regulation of White Adipocyte Differentiation	1	69	0.884956	0.814599	0.715701	1	1	1	HDAC3;
Hemostasis	7	375	6.19469	1.04042	0.514866	1	1	1	ATP2B4; F2RL3; RAC1; LAT; FYN; GUCY1B3; MERTK;
Platelet homeostasis	2	40	1.76991	2.79616	0.161047	1	1	1	ATP2B4; GUCY1B3;
Cell surface interactions at the vascular wall	2	72	1.76991	1.55359	0.372373	1	1	1	FYN; MERTK;
Thrombin signalling through proteinase activated receptors (PARs)	1	17	0.884956	3.30485	0.26551	1	1	1	F2RL3;
GPVI-mediated activation cascade	3	27	2.65487	6.20264	0.0120661	1	0.279532	1	RAC1; LAT; FYN;
Mitotic Prometaphase	1	99	0.884956	0.567776	0.836177	1	1	1	NUP85;
Mitotic Prophase	1	62	0.884956	0.906555	0.676803	1	1	1	FGFR1OP;
Golgi Cisternae Pericentriolar Stack Reorganization	1	62	0.884956	0.906555	0.676803	1	1	1	FGFR1OP;
Mitotic M-M/G1 phases	3	242	2.65487	0.692257	0.816697	1	1	1	FGFR1OP; NUP85; MCM4;
M Phase	2	158	1.76991	0.708021	0.782002	1	1	1	FGFR1OP; NUP85;
Processing of Intronless Pre-mRNAs	1	14	0.884956	4.01252	0.224356	1	1	1	NCBP2;
DNA Replication	3	261	2.65487	0.641865	0.854704	1	1	1	FGFR1OP; NUP85; MCM4;
Processing of Capped Intronless Pre-mRNA	1	23	0.884956	2.44309	0.341433	1	1	1	NCBP2;
Post-Elongation Processing of Intronless pre-mRNA	1	23	0.884956	2.44309	0.341433	1	1	1	NCBP2;
SLBP independent Processing of Histone Pre-mRNAs	1	10	0.884956	5.61593	0.16591	1	1	1	NCBP2;
SLBP Dependent Processing of Replication-Dependent Histone Pre-mRNAs	1	11	0.884956	5.10586	0.180919	1	1	1	NCBP2;
Post-Elongation Processing of the Transcript	1	43	0.884956	1.30703	0.542582	1	1	1	NCBP2;
Post-Elongation Processing of Intron-Containing pre-mRNA	1	34	0.884956	1.65291	0.460979	1	1	1	NCBP2;
mRNA 3'-end processing	1	34	0.884956	1.65291	0.460979	1	1	1	NCBP2;
Factors involved in megakaryocyte development and platelet production	1	119	0.884956	0.472359	0.886727	1	1	1	RAC1;
Netrin-1 signaling	1	45	0.884956	1.24896	0.558982	1	1	1	RAC1;
DCC mediated attractive signaling	1	10	0.884956	5.61593	0.16591	1	1	1	RAC1;
NCAM1 interactions	1	23	0.884956	2.44309	0.341433	1	1	1	ST8SIA4;
Neurotransmitter Receptor Binding And Downstream Transmission In The Postsynaptic Cell	1	89	0.884956	0.631564	0.803073	1	1	1	RPS6KA1;
Activation of NMDA receptor upon glutamate binding and postsynaptic events	1	34	0.884956	1.65291	0.460979	1	1	1	RPS6KA1;
Post NMDA receptor activation events	1	34	0.884956	1.65291	0.460979	1	1	1	RPS6KA1;
Neuronal System	1	188	0.884956	0.299003	0.96858	1	1	1	RPS6KA1;
Transmission across Chemical Synapses	1	121	0.884956	0.464552	0.890838	1	1	1	RPS6KA1;
RSK activation	1	7	0.884956	8.01933	0.119231	1	1	1	RPS6KA1;
CREB phosphorylation through the activation of Ras	1	28	0.884956	2.00698	0.398721	1	1	1	RPS6KA1;
Vpr-mediated nuclear import of PICs	2	31	1.76991	3.60769	0.106261	1	1	1	NUP62; NUP85;
Interactions of Vpr with host cellular proteins	2	34	1.76991	3.28945	0.123916	1	1	1	NUP62; NUP85;
Host Interactions of HIV factors	4	141	3.53982	1.58281	0.247387	1	1	1	NUP62; RAC1; NUP85; FYN;
Rev-mediated nuclear export of HIV-1 RNA	2	32	1.76991	3.49498	0.112067	1	1	1	NUP62; NUP85;
Abortive elongation of HIV-1 transcript in the absence of Tat	1	23	0.884956	2.44309	0.341433	1	1	1	NCBP2;
Formation of HIV-1 elongation complex in the absence of HIV-1 Tat	1	42	0.884956	1.33814	0.534157	1	1	1	NCBP2;
HIV-1 Transcription Elongation	1	41	0.884956	1.37077	0.525578	1	1	1	NCBP2;
Formation of the HIV-1 Early Elongation Complex	1	32	0.884956	1.75618	0.440971	1	1	1	NCBP2;
Tat-mediated elongation of the HIV-1 transcript	1	41	0.884956	1.37077	0.525578	1	1	1	NCBP2;
Formation of HIV-1 elongation complex containing HIV-1 Tat	1	41	0.884956	1.37077	0.525578	1	1	1	NCBP2;
Transcription of the HIV genome	2	60	1.76991	1.86426	0.293227	1	1	1	RNMT; NCBP2;
RNA Pol II CTD phosphorylation and interaction with CE	1	26	0.884956	2.1613	0.376424	1	1	1	RNMT;
Late Phase of HIV Life Cycle	4	92	3.53982	2.42574	0.0830445	1	0.959087	1	NUP62; RNMT; NCBP2; NUP85;
Early Phase of HIV Life Cycle	1	11	0.884956	5.10586	0.180919	1	1	1	XRCC6;
Integration of provirus	1	8	0.884956	7.01816	0.135071	1	1	1	XRCC6;
2-LTR circle formation	1	7	0.884956	8.01933	0.119231	1	1	1	XRCC6;
HIV Life Cycle	5	103	4.42478	2.70703	0.0373333	1	0.541495	1	NUP62; RNMT; XRCC6; NCBP2; NUP85;
HIV Infection	7	203	6.19469	1.92192	0.072111	1	0.865332	1	NUP62; RAC1; RNMT; XRCC6; NCBP2; NUP85; FYN;
Nuclear Events (kinase and transcription factor activation)	1	15	0.884956	3.7452	0.238322	1	1	1	RPS6KA1;
ERK/MAPK targets	1	12	0.884956	4.68072	0.195659	1	1	1	RPS6KA1;
p75 NTR receptor-mediated signalling	1	39	0.884956	1.44105	0.507947	1	1	1	RAC1;
Signalling by NGF	2	143	1.76991	0.782283	0.73289	1	1	1	RAC1; RPS6KA1;
NRAGE signals death through JNK	1	8	0.884956	7.01816	0.135071	1	1	1	RAC1;
Cell death signalling via NRAGE, NRIF and NADE	1	21	0.884956	2.67565	0.317032	1	1	1	RAC1;
NGF signalling via TRKA from the plasma membrane	1	107	0.884956	0.525329	0.858636	1	1	1	RPS6KA1;
Signal Transduction	9	1208	7.9646	0.415134	0.999769	1	1	1	F2RL3; RAC1; RPS6KA1; CXCL10; NOTCH2; XCL2; CCL5; PPP3R1; C3;
Assembly of the pre-replicative complex	1	83	0.884956	0.677213	0.780112	1	1	1	MCM4;
DNA Replication Pre-Initiation	1	98	0.884956	0.573569	0.833131	1	1	1	MCM4;
M/G1 Transition	1	98	0.884956	0.573569	0.833131	1	1	1	MCM4;
Loss of Nlp from mitotic centrosomes	1	61	0.884956	0.921414	0.670832	1	1	1	FGFR1OP;
Loss of proteins required for interphase microtubule organizationÃÂ from the centrosome	1	61	0.884956	0.921414	0.670832	1	1	1	FGFR1OP;
Mitotic G2-G2/M phases	1	99	0.884956	0.567776	0.836177	1	1	1	FGFR1OP;
G2/M Transition	1	96	0.884956	0.585517	0.826872	1	1	1	FGFR1OP;
Recruitment of mitotic centrosome proteins and complexes	1	70	0.884956	0.802963	0.720865	1	1	1	FGFR1OP;
Centrosome maturation	1	70	0.884956	0.802963	0.720865	1	1	1	FGFR1OP;
G1/S Transition	1	117	0.884956	0.480433	0.882463	1	1	1	MCM4;
S Phase	1	121	0.884956	0.464552	0.890838	1	1	1	MCM4;
Cyclin A:Cdk2-associated events at S phase entry	1	90	0.884956	0.624547	0.806661	1	1	1	MCM4;
G1 Phase	1	31	0.884956	1.81282	0.430693	1	1	1	CDK6;
G0 and Early G1	1	21	0.884956	2.67565	0.317032	1	1	1	TOP2A;
Transport of Mature mRNA Derived from an Intronless Transcript	3	35	2.65487	4.7853	0.0243488	1	0.448185	1	NUP62; NCBP2; NUP85;
Transport of the SLBP independent Mature mRNA	3	32	2.65487	5.23378	0.0191796	1	0.385441	1	NUP62; NCBP2; NUP85;
Mitotic G1-G1/S phases	3	140	2.65487	1.19658	0.462692	1	1	1	CDK6; TOP2A; MCM4;
Cell Cycle, Mitotic	5	317	4.42478	0.879628	0.680748	1	1	1	CDK6; FGFR1OP; TOP2A; NUP85; MCM4;
Transport of Mature mRNA derived from an Intron-Containing Transcript	3	51	2.65487	3.28432	0.0631486	1	0.786058	1	NUP62; NCBP2; NUP85;
Transport of Mature Transcript to Cytoplasm	3	55	2.65487	3.0455	0.0756257	1	0.888335	1	NUP62; NCBP2; NUP85;
Transport of the SLBP Dependant Mature mRNA	3	33	2.65487	5.07523	0.0208272	1	0.403951	1	NUP62; NCBP2; NUP85;
Transport of Mature mRNAs Derived from Intronless Transcripts	3	36	2.65487	4.65241	0.0262228	1	0.470318	1	NUP62; NCBP2; NUP85;
Cyclin D associated events in G1	1	31	0.884956	1.81282	0.430693	1	1	1	CDK6;
mRNA Splicing - Minor Pathway	1	42	0.884956	1.33814	0.534157	1	1	1	NCBP2;
mRNA Splicing - Major Pathway	1	107	0.884956	0.525329	0.858636	1	1	1	NCBP2;
mRNA Splicing	1	107	0.884956	0.525329	0.858636	1	1	1	NCBP2;
Processing of Capped Intron-Containing Pre-mRNA	3	138	2.65487	1.21392	0.45328	1	1	1	NUP62; NCBP2; NUP85;
mRNA Capping	2	28	1.76991	3.99409	0.0893803	1	0.968093	1	RNMT; NCBP2;
mRNA Processing	4	157	3.53982	1.42152	0.311682	1	1	1	NUP62; RNMT; NCBP2; NUP85;
Unfolded Protein Response	3	63	2.65487	2.65884	0.103508	1	1	1	PPP2R5B; ASNS; TPP1;
Insulin Synthesis and Processing	1	132	0.884956	0.425843	0.91094	1	1	1	SRP72;
Activation of Chaperones by IRE1alpha	2	45	1.76991	2.48554	0.193324	1	1	1	PPP2R5B; TPP1;
PERK regulated gene expression	1	11	0.884956	5.10586	0.180919	1	1	1	ASNS;
Diabetes pathways	4	216	3.53982	1.03325	0.547498	1	1	1	SRP72; PPP2R5B; ASNS; TPP1;
Removal of licensing factors from origins	1	85	0.884956	0.661281	0.788046	1	1	1	MCM4;
Regulation of DNA replication	1	88	0.884956	0.63874	0.799418	1	1	1	MCM4;
Activation of the pre-replicative complex	1	30	0.884956	1.87322	0.420228	1	1	1	MCM4;
Synthesis of DNA	1	109	0.884956	0.515691	0.863756	1	1	1	MCM4;
Switching of origins to a post-replicative state	1	83	0.884956	0.677213	0.780112	1	1	1	MCM4;
Orc1 removal from chromatin	1	83	0.884956	0.677213	0.780112	1	1	1	MCM4;
DNA strand elongation	1	31	0.884956	1.81282	0.430693	1	1	1	MCM4;
Unwinding of DNA	1	11	0.884956	5.10586	0.180919	1	1	1	MCM4;
Mature Notch receptor traffics to plasma membrane	1	4	0.884956	14.0188	0.069963	1	0.845639	1	NOTCH2;
Notch receptor binds with a ligand	1	8	0.884956	7.01816	0.135071	1	1	1	NOTCH2;
Transport of Notch receptor precursor to golgi	1	4	0.884956	14.0188	0.069963	1	0.845639	1	NOTCH2;
Maturation of Notch precursor via proteolytic cleavage	1	5	0.884956	11.2207	0.0866817	1	0.963901	1	NOTCH2;
Signaling by Notch	1	21	0.884956	2.67565	0.317032	1	1	1	NOTCH2;
Chemokine receptors bind chemokines	3	42	2.65487	3.98794	0.0390394	1	0.56136	1	CXCL10; XCL2; CCL5;
Signaling by GPCR	7	800	6.19469	0.487705	0.99256	1	1	1	F2RL3; RAC1; CXCL10; XCL2; CCL5; PPP3R1; C3;
GPCR ligand binding	5	336	4.42478	0.829889	0.729573	1	1	1	F2RL3; CXCL10; XCL2; CCL5; C3;
Class A/1 (Rhodopsin-like receptors)	5	274	4.42478	1.01767	0.550908	1	1	1	F2RL3; CXCL10; XCL2; CCL5; C3;
Peptide ligand-binding receptors	5	167	4.42478	1.66967	0.180896	1	1	1	F2RL3; CXCL10; XCL2; CCL5; C3;
Receptor-ligand binding initiates the second proteolytic cleavage of Notch receptor	1	9	0.884956	6.23923	0.15063	1	1	1	NOTCH2;
A third proteolytic cleavage releases NICD	1	8	0.884956	7.01816	0.135071	1	1	1	NOTCH2;
NICD traffics to nucleus	1	11	0.884956	5.10586	0.180919	1	1	1	NOTCH2;
CREB phosphorylation	1	7	0.884956	8.01933	0.119231	1	1	1	RPS6KA1;
Signaling by SCF-KIT	1	66	0.884956	0.85162	0.699634	1	1	1	RAC1;
GPCR downstream signaling	2	530	1.76991	0.21108	0.999494	1	1	1	F2RL3; RAC1;
G alpha (12/13) signalling events	1	21	0.884956	2.67565	0.317032	1	1	1	RAC1;
G alpha (q) signalling events	1	120	0.884956	0.468423	0.888801	1	1	1	F2RL3;
Opioid Signalling	1	53	0.884956	1.06047	0.618953	1	1	1	PPP3R1;
Adaptive Immune System	7	237	6.19469	1.64621	0.133369	1	1	1	CD226; RAC1; LAT; ICOS; CTSS; C3; FYN;
TCR signaling	1	47	0.884956	1.19582	0.574799	1	1	1	LAT;
Immune System	18	522	15.9292	1.9203	0.00512723	1	0.167686	0.817477	CD226; IFNG; IL18; IL2; RAC1; RPS6KA1; SP100; LAT; ICOS; IL2RA; C1QB; C1QA; CFD; CTSS; GBP2; C3; IL1B; FYN;
RNA Polymerase II Transcription	2	101	1.76991	1.10756	0.545562	1	1	1	RNMT; NCBP2;
Formation and Maturation of mRNA Transcript	4	185	3.53982	1.20638	0.426506	1	1	1	NUP62; RNMT; NCBP2; NUP85;
DARPP-32 events	1	18	0.884956	3.12135	0.27874	1	1	1	PPP3R1;
Gene Expression	5	378	4.42478	0.737682	0.818087	1	1	1	NUP62; RNMT; NCBP2; NUP85; NOTCH2;
Generic Transcription Pathway	1	35	0.884956	1.6057	0.470716	1	1	1	NOTCH2;
Notch-HLH transcription pathway	1	11	0.884956	5.10586	0.180919	1	1	1	NOTCH2;
Cleavage of Growing Transcript in the Termination Region	1	43	0.884956	1.30703	0.542582	1	1	1	NCBP2;
RNA Polymerase II Transcription Termination	1	43	0.884956	1.30703	0.542582	1	1	1	NCBP2;
Formation of RNA Pol II elongation complex	1	42	0.884956	1.33814	0.534157	1	1	1	NCBP2;
RNA Polymerase II Pre-transcription Events	1	58	0.884956	0.969065	0.652254	1	1	1	NCBP2;
RNA Polymerase II Transcription Elongation	1	42	0.884956	1.33814	0.534157	1	1	1	NCBP2;
Formation of the Early Elongation Complex	1	32	0.884956	1.75618	0.440971	1	1	1	NCBP2;
RNA Pol II CTD phosphorylation and interaction with CE - 11	1	26	0.884956	2.1613	0.376424	1	1	1	RNMT;
Pyruvate metabolism and Citric Acid (TCA) cycle	1	31	0.884956	1.81282	0.430693	1	1	1	SUCLG1;
The citric acid (TCA) cycle and respiratory electron transport	1	118	0.884956	0.476362	0.884615	1	1	1	SUCLG1;
Pyrimidine salvage reactions	1	7	0.884956	8.01933	0.119231	1	1	1	DCK;
Synthesis and interconversion of nucleotide di- and triphosphates	2	16	1.76991	6.98778	0.0325777	1	0.525643	1	GLRX; RRM1;
Purine salvage	1	7	0.884956	8.01933	0.119231	1	1	1	DCK;
Pyrimidine metabolism	1	22	0.884956	2.55409	0.329343	1	1	1	DCK;
DNA Repair	1	106	0.884956	0.530285	0.856005	1	1	1	XRCC6;
Amino acid and oligopeptide SLC transporters	2	48	1.76991	2.33023	0.213074	1	1	1	SLC1A5; SLC7A1;
Cholesterol biosynthesis	1	20	0.884956	2.80937	0.304498	1	1	1	PMVK;
Regulation of Lipid Metabolism by Peroxisome proliferator-activated receptor alpha (PPARalpha)	1	32	0.884956	1.75618	0.440971	1	1	1	FASN;
Nonhomologous End-joining (NHEJ)	1	5	0.884956	11.2207	0.0866817	1	0.963901	1	XRCC6;
Processing of DNA ends prior to end rejoining	1	3	0.884956	18.6762	0.0529409	1	0.700837	1	XRCC6;
Double-Strand Break Repair	1	27	0.884956	2.08128	0.387673	1	1	1	XRCC6;
Metabolism	16	823	14.1593	1.08273	0.407807	1	1	1	CNOT10; EXOSC5; GLRX; NUP62; SLC2A1; SUCLG1; ZFP36L1; DCK; NCBP2; NUP85; GCDH; RRM1; IDO1; ASNS; FASN; SRM;
Purine metabolism	1	24	0.884956	2.34134	0.353308	1	1	1	DCK;
Metabolism of nucleotides	3	58	2.65487	2.88801	0.0856428	1	0.963901	1	GLRX; DCK; RRM1;
Amine compound SLC transporters	1	29	0.884956	1.9378	0.409571	1	1	1	SLC44A1;
Cell Cycle Checkpoints	1	118	0.884956	0.476362	0.884615	1	1	1	MCM4;
G2/M DNA damage checkpoint	1	29	0.884956	1.9378	0.409571	1	1	1	MCM4;
G2/M Checkpoints	1	43	0.884956	1.30703	0.542582	1	1	1	MCM4;
Activation of ATR in response to replication stress	1	37	0.884956	1.51893	0.489668	1	1	1	MCM4;
Hypusine synthesis from eIF5A-lysine	1	2	0.884956	27.9679	0.0356101	1	0.525643	1	DOHH;
Post-translational protein modification	1	114	0.884956	0.493075	0.875767	1	1	1	DOHH;
Post-translational modification: gamma carboxylation and hypusine formation	1	14	0.884956	4.01252	0.224356	1	1	1	DOHH;
Metabolism of proteins	1	259	0.884956	0.21704	0.991731	1	1	1	DOHH;
NEP/NS2 Interacts with the Cellular Export Machinery	2	29	1.76991	3.85641	0.0949131	1	0.995692	1	NUP62; NUP85;
Export of Viral Ribonucleoproteins from Nucleus	2	31	1.76991	3.60769	0.106261	1	1	1	NUP62; NUP85;
Influenza Life Cycle	2	135	1.76991	0.828637	0.703084	1	1	1	NUP62; NUP85;
Transport of Ribonucleoproteins into the Host Nucleus	2	29	1.76991	3.85641	0.0949131	1	0.995692	1	NUP62; NUP85;
Influenza Infection	2	140	1.76991	0.799045	0.722019	1	1	1	NUP62; NUP85;
Endosomal Sorting Complex Required For Transport (ESCRT)	1	28	0.884956	2.00698	0.398721	1	1	1	TSG101;
Membrane Trafficking	1	84	0.884956	0.669152	0.784116	1	1	1	TSG101;
Integration of energy metabolism	1	83	0.884956	0.677213	0.780112	1	1	1	FASN;
Metabolism of polyamines	1	15	0.884956	3.7452	0.238322	1	1	1	SRM;
Tryptophan catabolism	1	11	0.884956	5.10586	0.180919	1	1	1	IDO1;
ChREBP activates metabolic gene expression	1	6	0.884956	9.35366	0.103103	1	1	1	FASN;
Nonsense-Mediated Decay	1	104	0.884956	0.540481	0.850596	1	1	1	NCBP2;
Destabilization of mRNA by KSRP	1	19	0.884956	2.95715	0.291735	1	1	1	EXOSC5;
Destabilization of mRNA by Butyrate Response Factor 1 (BRF1)	2	20	1.76991	5.59092	0.0492466	1	0.690281	1	EXOSC5; ZFP36L1;
Destabilization of mRNA by Tristetraprolin (TTP)	1	17	0.884956	3.30485	0.26551	1	1	1	EXOSC5;
Regulation of mRNA Stability by Proteins that Bind AU-rich Elements	2	104	1.76991	1.07561	0.561528	1	1	1	EXOSC5; ZFP36L1;
mRNA Decay by 3' to 5' Exoribonuclease	1	11	0.884956	5.10586	0.180919	1	1	1	EXOSC5;
Deadenylation-dependent mRNA decay	2	46	1.76991	2.43152	0.199882	1	1	1	CNOT10; EXOSC5;
Deadenylation of mRNA	1	22	0.884956	2.55409	0.329343	1	1	1	CNOT10;
Metabolism of mRNA	4	234	3.53982	0.953772	0.611523	1	1	1	CNOT10; EXOSC5; ZFP36L1; NCBP2;
Metabolism of RNA	6	281	5.30973	1.19038	0.392658	1	1	1	CNOT10; EXOSC5; NUP62; ZFP36L1; NCBP2; NUP85;
Citric acid cycle (TCA cycle)	1	19	0.884956	2.95715	0.291735	1	1	1	SUCLG1;
Metabolism of amino acids and derivatives	4	188	3.53982	1.18713	0.43865	1	1	1	GCDH; IDO1; ASNS; SRM;
Lysine catabolism	1	8	0.884956	7.01816	0.135071	1	1	1	GCDH;
Amino acid synthesis and interconversion (transamination)	1	10	0.884956	5.61593	0.16591	1	1	1	ASNS;
Vitamin B5 (pantothenate) metabolism	1	9	0.884956	6.23923	0.15063	1	1	1	FASN;
Nonsense Mediated Decay Enhanced by the Exon Junction Complex	1	104	0.884956	0.540481	0.850596	1	1	1	NCBP2;
Nonsense Mediated Decay Independent of the Exon Junction Complex	1	87	0.884956	0.646081	0.795697	1	1	1	NCBP2;
Metabolism of non-coding RNA	3	50	2.65487	3.34999	0.0601929	1	0.7549	1	NUP62; NCBP2; NUP85;
snRNP Assembly	3	50	2.65487	3.34999	0.0601929	1	0.7549	1	NUP62; NCBP2; NUP85;
Metabolism of vitamins and cofactors	2	47	1.76991	2.3798	0.206466	1	1	1	SLC2A1; FASN;
Metabolism of water-soluble vitamins and cofactors	2	47	1.76991	2.3798	0.206466	1	1	1	SLC2A1; FASN;
Vitamin C (ascorbate) metabolism	1	6	0.884956	9.35366	0.103103	1	1	1	SLC2A1;
Glucose transport	3	38	2.65487	4.40761	0.0301965	1	0.511406	1	NUP62; SLC2A1; NUP85;
Regulation of Glucokinase by Glucokinase Regulatory Protein	2	29	1.76991	3.85641	0.0949131	1	0.995692	1	NUP62; NUP85;
Hexose transport	3	40	2.65487	4.18728	0.0344697	1	0.525643	1	NUP62; SLC2A1; NUP85;
BMAL1:CLOCK/NPAS2 Activates Gene Expression	1	23	0.884956	2.44309	0.341433	1	1	1	HDAC3;
Metabolism of carbohydrates	3	92	2.65487	1.82082	0.228815	1	1	1	NUP62; SLC2A1; NUP85;
Circadian Clock	1	32	0.884956	1.75618	0.440971	1	1	1	HDAC3;
Fatty Acyl-CoA Biosynthesis	2	18	1.76991	6.21179	0.0405843	1	0.573683	1	ACSL5; FASN;
Synthesis of very long-chain fatty acyl-CoAs	1	14	0.884956	4.01252	0.224356	1	1	1	ACSL5;
Fatty acid, triacylglycerol, and ketone body metabolism	2	83	1.76991	1.34772	0.441749	1	1	1	ACSL5; FASN;
Triglyceride Biosynthesis	2	28	1.76991	3.99409	0.0893803	1	0.968093	1	ACSL5; FASN;
Cell-cell junction organization	1	45	0.884956	1.24896	0.558982	1	1	1	JUP;
Cell-Cell communication	3	117	2.65487	1.43179	0.351336	1	1	1	RAC1; JUP; FYN;
Cell junction organization	1	69	0.884956	0.814599	0.715701	1	1	1	JUP;
Transmembrane transport of small molecules	9	378	7.9646	1.32665	0.237747	1	1	1	ATP2B4; NUP62; SLC2A1; SLC31A1; NUP85; SLC29A1; SLC1A5; SLC7A1; SLC44A1;
Transport of inorganic cations/anions and amino acids/oligopeptides	2	94	1.76991	1.19003	0.50678	1	1	1	SLC1A5; SLC7A1;
SLC-mediated transmembrane transport	8	247	7.07965	1.8049	0.0756003	1	0.888335	1	NUP62; SLC2A1; SLC31A1; NUP85; SLC29A1; SLC1A5; SLC7A1; SLC44A1;
Adherens junctions interactions	1	27	0.884956	2.08128	0.387673	1	1	1	JUP;
DSCAM interactions	1	9	0.884956	6.23923	0.15063	1	1	1	RAC1;
Nephrin interactions	1	29	0.884956	1.9378	0.409571	1	1	1	FYN;
Metal ion SLC transporters	1	25	0.884956	2.24772	0.36497	1	1	1	SLC31A1;
Amino acid transport across the plasma membrane	2	31	1.76991	3.60769	0.106261	1	1	1	SLC1A5; SLC7A1;
Transport of glucose and other sugars, bile salts and organic acids, metal ions and amine compounds	3	94	2.65487	1.78208	0.238379	1	1	1	SLC2A1; SLC31A1; SLC44A1;
Facilitative Na+-independent glucose transporters	1	12	0.884956	4.68072	0.195659	1	1	1	SLC2A1;
Ion channel transport	1	46	0.884956	1.22181	0.566962	1	1	1	ATP2B4;
Metabolism of lipids and lipoproteins	3	257	2.65487	0.651855	0.847318	1	1	1	ACSL5; PMVK; FASN;
Ion transport by P-type ATPases	1	29	0.884956	1.9378	0.409571	1	1	1	ATP2B4;
Transport of vitamins, nucleosides, and related molecules	1	30	0.884956	1.87322	0.420228	1	1	1	SLC29A1;
Transport of nucleosides and free purine and pyrimidine bases across the plasma membrane	1	7	0.884956	8.01933	0.119231	1	1	1	SLC29A1;
Class I MHC mediated antigen processing & presentation	1	101	0.884956	0.556534	0.842103	1	1	1	CTSS;
CD28 co-stimulation	2	36	1.76991	3.10676	0.136052	1	1	1	RAC1; FYN;
CD28 dependent PI3K/Akt signaling	1	17	0.884956	3.30485	0.26551	1	1	1	FYN;
CD28 dependent Vav1 pathway	2	18	1.76991	6.21179	0.0405843	1	0.573683	1	RAC1; FYN;
Generation of second messenger molecules	1	19	0.884956	2.95715	0.291735	1	1	1	LAT;
Costimulation by the CD28 family	3	52	2.65487	3.22117	0.0661706	1	0.811563	1	RAC1; ICOS; FYN;
Transcription	3	178	2.65487	0.941145	0.625469	1	1	1	RNMT; NCBP2; POLR1C;
RNA Polymerase I, RNA Polymerase III, and Mitochondrial Transcription	1	92	0.884956	0.610971	0.813645	1	1	1	POLR1C;
RNA Polymerase I Transcription	1	56	0.884956	1.00367	0.639295	1	1	1	POLR1C;
RNA Polymerase I Promoter Clearance	1	54	0.884956	1.04083	0.625857	1	1	1	POLR1C;
RNA Polymerase I Promoter Escape	1	20	0.884956	2.80937	0.304498	1	1	1	POLR1C;
RNA Polymerase I Transcription Initiation	1	24	0.884956	2.34134	0.353308	1	1	1	POLR1C;
RNA Polymerase I Chain Elongation	1	48	0.884956	1.17091	0.582495	1	1	1	POLR1C;
RNA Polymerase I Transcription Termination	1	21	0.884956	2.67565	0.317032	1	1	1	POLR1C;
Activation and oligomerization of BAK protein	1	2	0.884956	27.9679	0.0356101	1	0.525643	1	BID;
Activation, translocation and oligomerization of BAX	1	2	0.884956	27.9679	0.0356101	1	0.525643	1	BID;
BH3-only proteins associate with and inactivate anti-apoptotic BCL-2 members	1	3	0.884956	18.6762	0.0529409	1	0.700837	1	BID;
Intrinsic Pathway for Apoptosis	3	31	2.65487	5.40255	0.0176074	1	0.365934	1	GZMB; BID; PPP3R1;
Activation of BH3-only proteins	2	17	1.76991	6.57698	0.0364954	1	0.533985	1	BID; PPP3R1;
Activation, myristolyation of BID and translocation to mitochondria	2	5	1.76991	22.3302	0.00308789	1	0.167686	0.817477	GZMB; BID;
Activation of BAD and translocation to mitochondria	2	7	1.76991	15.9593	0.00633356	1	0.170338	0.830406	BID; PPP3R1;
Apoptosis	3	158	2.65487	1.06027	0.543944	1	1	1	GZMB; BID; PPP3R1;
TRIF mediated TLR3 signaling	1	56	0.884956	1.00367	0.639295	1	1	1	RPS6KA1;
Toll Like Receptor 3 (TLR3) Cascade	1	56	0.884956	1.00367	0.639295	1	1	1	RPS6KA1;
TRAF6 Mediated Induction of proinflammatory cytokines	1	50	0.884956	1.12408	0.597476	1	1	1	RPS6KA1;
Toll Like Receptor 5 (TLR5) Cascade	1	60	0.884956	0.936768	0.664751	1	1	1	RPS6KA1;
Toll Like Receptor 7/8 (TLR7/8) Cascade	1	62	0.884956	0.906555	0.676803	1	1	1	RPS6KA1;
MyD88 dependent cascade initiated on endosome	1	60	0.884956	0.936768	0.664751	1	1	1	RPS6KA1;
TRAF6 mediated induction of NFkB and MAP kinases upon TLR7/8 or 9 activation	1	59	0.884956	0.952643	0.658559	1	1	1	RPS6KA1;
Toll Like Receptor 9 (TLR9) Cascade	1	65	0.884956	0.86472	0.694081	1	1	1	RPS6KA1;
Activated TLR4 signalling	1	72	0.884956	0.780662	0.730916	1	1	1	RPS6KA1;
MyD88:Mal cascade initiated on plasma membrane	1	62	0.884956	0.906555	0.676803	1	1	1	RPS6KA1;
Toll Like Receptor 4 (TLR4) Cascade	1	76	0.884956	0.73958	0.749954	1	1	1	RPS6KA1;
NFkB and MAP kinases activation mediated by TLR4 signaling repertoire	1	54	0.884956	1.04083	0.625857	1	1	1	RPS6KA1;
MyD88-independent cascade initiated on plasma membrane	1	58	0.884956	0.969065	0.652254	1	1	1	RPS6KA1;
Innate Immune System	5	183	4.42478	1.52369	0.231968	1	1	1	RPS6KA1; C1QB; C1QA; CFD; C3;
Toll Receptor Cascades	1	90	0.884956	0.624547	0.806661	1	1	1	RPS6KA1;
Endosomal/Vacuolar pathway	1	9	0.884956	6.23923	0.15063	1	1	1	CTSS;
Immunoregulatory interactions between a Lymphoid and a non-Lymphoid cell	2	52	1.76991	2.15102	0.239684	1	1	1	CD226; C3;
Antigen processing-Cross presentation	1	86	0.884956	0.653592	0.791906	1	1	1	CTSS;
Toll Like Receptor 10 (TLR10) Cascade	1	60	0.884956	0.936768	0.664751	1	1	1	RPS6KA1;
MAPK targets/ Nuclear events mediated by MAP kinases	1	21	0.884956	2.67565	0.317032	1	1	1	RPS6KA1;
MAP kinase activation in TLR cascade	1	30	0.884956	1.87322	0.420228	1	1	1	RPS6KA1;
MyD88 cascade initiated on plasma membrane	1	59	0.884956	0.952643	0.658559	1	1	1	RPS6KA1;
Cytokine Signaling in Immune system	8	193	7.07965	2.30987	0.0223494	1	0.423622	1	IFNG; IL18; IL2; SP100; IL2RA; GBP2; IL1B; FYN;
Interferon alpha/beta signaling	1	77	0.884956	0.729976	0.754501	1	1	1	GBP2;
Interferon Signaling	3	98	2.65487	1.70935	0.257706	1	1	1	IFNG; SP100; GBP2;
Interferon gamma signaling	3	47	2.65487	3.56378	0.0517332	1	0.700837	1	IFNG; SP100; GBP2;
Regulation of IFNG signaling	1	13	0.884956	4.32094	0.210137	1	1	1	IFNG;
Interleukin-1 signaling	1	39	0.884956	1.44105	0.507947	1	1	1	IL1B;
Interleukin-2 signaling	2	28	1.76991	3.99409	0.0893803	1	0.968093	1	IL2; IL2RA;
Signaling by Interleukins	5	92	4.42478	3.03066	0.0244514	1	0.448185	1	IL18; IL2; IL2RA; IL1B; FYN;
Interleukin-1 processing	2	6	1.76991	18.6147	0.00457755	1	0.167686	0.817477	IL18; IL1B;
Regulation of signaling by CBL	1	6	0.884956	9.35366	0.103103	1	1	1	FYN;
Interleukin-3, 5 and GM-CSF signaling	1	29	0.884956	1.9378	0.409571	1	1	1	FYN;
Toll Like Receptor 2 (TLR2) Cascade	1	65	0.884956	0.86472	0.694081	1	1	1	RPS6KA1;
Toll Like Receptor TLR1:TLR2 Cascade	1	64	0.884956	0.878229	0.688426	1	1	1	RPS6KA1;
Classical antibody-mediated complement activation	2	6	1.76991	18.6147	0.00457755	1	0.167686	0.817477	C1QB; C1QA;
Toll Like Receptor TLR6:TLR2 Cascade	1	64	0.884956	0.878229	0.688426	1	1	1	RPS6KA1;
Creation of C4 and C2 activators	2	9	1.76991	12.4167	0.0106054	1	0.256374	1	C1QB; C1QA;
Activation of C3 and C5	1	3	0.884956	18.6762	0.0529409	1	0.700837	1	C3;
Alternative complement activation	2	3	1.76991	37.1676	0.000948515	1	0.121702	0.593302	CFD; C3;
superpathway of serine and glycine biosynthesis I	2	4	1.76991	27.8988	0.00187474	1	0.167686	0.817477	PHGDH; PSAT1;
hypusine biosynthesis	1	2	0.884956	27.9679	0.0356101	1	0.525643	1	DOHH;
asparagine biosynthesis I	1	1	0.884956	55.6589	0.017965	1	0.365934	1	ASNS;
chondroitin sulfate biosynthesis	1	20	0.884956	2.80937	0.304498	1	1	1	CHST11;
chondroitin sulfate biosynthesis (late stages)	1	12	0.884956	4.68072	0.195659	1	1	1	CHST11;
mevalonate pathway I	1	10	0.884956	5.61593	0.16591	1	1	1	PMVK;
superpathway of geranylgeranyldiphosphate biosynthesis I (via mevalonate)	1	13	0.884956	4.32094	0.210137	1	1	1	PMVK;
glutamate removal from folates	1	1	0.884956	55.6589	0.017965	1	0.365934	1	GGH;
sphingomyelin metabolism	1	7	0.884956	8.01933	0.119231	1	1	1	SMPD1;
fatty acid biosynthesis initiation II	1	2	0.884956	27.9679	0.0356101	1	0.525643	1	FASN;
palmitate biosynthesis I (animals)	1	2	0.884956	27.9679	0.0356101	1	0.525643	1	FASN;
stearate biosynthesis I (animals)	1	12	0.884956	4.68072	0.195659	1	1	1	ACSL5;
3-phosphoinositide biosynthesis	1	26	0.884956	2.1613	0.376424	1	1	1	PI4KA;
superpathway of cholesterol biosynthesis	1	25	0.884956	2.24772	0.36497	1	1	1	PMVK;
guanosine nucleotides de novo biosynthesis	1	14	0.884956	4.01252	0.224356	1	1	1	RRM1;
pyrimidine deoxyribonucleotides de novo biosynthesis	1	14	0.884956	4.01252	0.224356	1	1	1	RRM1;
spermidine biosynthesis	1	2	0.884956	27.9679	0.0356101	1	0.525643	1	SRM;
superpathway of N-acetylglucosamine, N-acetylmannosamine and N-acetylneuraminate degradation	1	5	0.884956	11.2207	0.0866817	1	0.963901	1	NPL;
glycine betaine degradation	1	9	0.884956	6.23923	0.15063	1	1	1	SDS;
N-acetylneuraminate and N-acetylmannosamine degradation	1	2	0.884956	27.9679	0.0356101	1	0.525643	1	NPL;
L-serine degradation	1	2	0.884956	27.9679	0.0356101	1	0.525643	1	SDS;
tryptophan degradation XI (mammalian, via kynurenine)	1	8	0.884956	7.01816	0.135071	1	1	1	IDO1;
tryptophan degradation III (eukaryotic)	1	9	0.884956	6.23923	0.15063	1	1	1	GCDH;
glutaryl-CoA degradation	1	3	0.884956	18.6762	0.0529409	1	0.700837	1	GCDH;
itaconate degradation	1	2	0.884956	27.9679	0.0356101	1	0.525643	1	SUCLG1;
ascorbate recycling (cytosolic)	1	1	0.884956	55.6589	0.017965	1	0.365934	1	GLRX;
triacylglycerol degradation	1	14	0.884956	4.01252	0.224356	1	1	1	LIPG;
fatty acid beta-oxidation I	1	19	0.884956	2.95715	0.291735	1	1	1	ACSL5;
glutathione-mediated detoxification	1	19	0.884956	2.95715	0.291735	1	1	1	GGH;
TCA cycle variation III (eukaryotic)	1	13	0.884956	4.32094	0.210137	1	1	1	SUCLG1;
Wnt signaling network	5	200	4.42478	1.39419	0.29016	1	1	1	CDK6; RAC1; XRCC6; KRT1; LRP5;
Beta2 integrin cell surface interactions	2	28	1.76991	3.99409	0.0893803	1	0.968093	1	TGFBI; C3;
CXCR3-mediated signaling events	1	37	0.884956	1.51893	0.489668	1	1	1	CXCL10;
Osteopontin-mediated events	1	29	0.884956	1.9378	0.409571	1	1	1	RAC1;
Regulation of cytoplasmic and nuclear SMAD2/3 signaling	8	305	7.07965	1.46168	0.181494	1	1	1	IFNG; IL2; RAC1; IL2RA; CREM; RALB; KRT8; FYN;
ErbB2/ErbB3 signaling events	1	38	0.884956	1.47897	0.49889	1	1	1	RAC1;
Validated targets of C-MYC transcriptional repression	3	63	2.65487	2.65884	0.103508	1	1	1	HDAC3; ZFP36L1; CCL5;
IL6-mediated signaling events	1	47	0.884956	1.19582	0.574799	1	1	1	RAC1;
Signaling events mediated by the Hedgehog family	1	65	0.884956	0.86472	0.694081	1	1	1	LRPAP1;
EphrinA-EPHA pathway	2	43	1.76991	2.60112	0.180301	1	1	1	RAC1; FYN;
Signaling events mediated by HDAC Class I	4	113	3.53982	1.97498	0.145064	1	1	1	HDAC3; NUP62; XRCC6; HDAC4;
EPHA forward signaling	1	31	0.884956	1.81282	0.430693	1	1	1	FYN;
Integrins in angiogenesis	2	64	1.76991	1.74776	0.319878	1	1	1	PI4KA; RAC1;
Syndecan-1-mediated signaling events	36	1297	31.8584	1.54531	0.00310509	1	0.167686	0.817477	CDK6; HDAC3; IFNG; IL2; LIF; LTA; NCKAP1; PFKFB3; PRF1; RAC1; RPS6KA1; SLC2A1; TNFRSF18; TNFRSF4; TSG101; XRCC6; ZFP36L1; LAT; MSH2; IL2RA; GZMB; CREM; JUP; CAMSAP3; MMP12; CCL5; KRT5; SMARCC1; BID; KRT1; RALB; KRT8; HPSE; LRP1; CTSD; FYN;
Regulation of CDC42 activity	22	768	19.469	1.5951	0.0168858	1	0.365787	1	CDK6; IFNG; IL2; LIF; NCKAP1; PFKFB3; PRF1; RAC1; SLC2A1; TNFRSF18; TNFRSF4; TSG101; XRCC6; IL2RA; GZMB; CREM; KRT5; SMARCC1; KRT1; RALB; KRT8; FYN;
Notch-mediated HES/HEY network	1	94	0.884956	0.597973	0.820379	1	1	1	NOTCH2;
Glypican pathway	36	1335	31.8584	1.50132	0.00511464	1	0.167686	0.817477	CDK6; HDAC3; IFNG; IL2; LIF; LTA; NCKAP1; PFKFB3; PRF1; RAC1; RPS6KA1; SLC2A1; TNFRSF18; TNFRSF4; TSG101; XRCC6; ZFP36L1; LAT; MSH2; IL2RA; GZMB; CREM; JUP; CAMSAP3; MMP12; CCL5; KRT5; SMARCC1; BID; KRT1; RALB; KRT8; LRP1; CTSD; FYN; LRP5;
Arf1 pathway	1	20	0.884956	2.80937	0.304498	1	1	1	RAC1;
GMCSF-mediated signaling events	36	1289	31.8584	1.5549	0.00278327	1	0.167686	0.817477	CDK6; HDAC3; IFNG; IL2; LIF; LTA; NCKAP1; OSM; PFKFB3; PRF1; RAC1; RPS6KA1; SLC2A1; TNFRSF18; TNFRSF4; TSG101; XRCC6; ZFP36L1; LAT; MSH2; IL2RA; GZMB; CREM; JUP; CAMSAP3; MMP12; CCL5; KRT5; SMARCC1; BID; KRT1; RALB; KRT8; LRP1; CTSD; FYN;
Validated transcriptional targets of deltaNp63 isoforms	3	64	2.65487	2.6173	0.107247	1	1	1	TOP2A; KRT5; FASN;
IL27-mediated signaling events	4	26	3.53982	8.58101	0.00108807	1	0.129636	0.631982	IFNG; IL18; IL2; IL1B;
Sumoylation by RanBP2 regulates transcriptional repression	2	15	1.76991	7.45332	0.0288387	1	0.504959	1	NUP62; HDAC4;
Insulin Pathway	35	1285	30.9735	1.51642	0.00499184	1	0.167686	0.817477	CDK6; HDAC3; IFNG; IL2; LIF; LTA; NCKAP1; PFKFB3; PRF1; RAC1; RPS6KA1; SLC2A1; TNFRSF18; TNFRSF4; TSG101; XRCC6; ZFP36L1; LAT; MSH2; IL2RA; GZMB; CREM; JUP; CAMSAP3; MMP12; CCL5; KRT5; SMARCC1; BID; KRT1; RALB; KRT8; LRP1; CTSD; FYN;
C-MYC pathway	4	149	3.53982	1.49783	0.27922	1	1	1	HDAC3; SLC2A1; ZFP36L1; CCL5;
Signaling events mediated by HDAC Class II	3	38	2.65487	4.40761	0.0301965	1	0.511406	1	HDAC3; NUP62; HDAC4;
Stabilization and expansion of the E-cadherin adherens junction	9	275	7.9646	1.82352	0.0582802	1	0.744983	1	CDK6; NCKAP1; RAC1; RPS6KA1; XRCC6; JUP; CAMSAP3; KRT1; FYN;
Glypican 3 network	5	206	4.42478	1.35358	0.311347	1	1	1	CDK6; RAC1; XRCC6; KRT1; LRP5;
Nectin adhesion pathway	35	1292	30.9735	1.50821	0.00546193	1	0.167686	0.817477	CDK6; HDAC3; IFNG; IL2; LIF; LTA; NCKAP1; PFKFB3; PRF1; RAC1; RPS6KA1; SLC2A1; TNFRSF18; TNFRSF4; TSG101; XRCC6; ZFP36L1; LAT; MSH2; IL2RA; GZMB; CREM; JUP; CAMSAP3; MMP12; CCL5; KRT5; SMARCC1; BID; KRT1; RALB; KRT8; LRP1; CTSD; FYN;
FGF signaling pathway	1	48	0.884956	1.17091	0.582495	1	1	1	RPS6KA1;
Validated nuclear estrogen receptor beta network	1	15	0.884956	3.7452	0.238322	1	1	1	C3;
Neurotrophic factor-mediated Trk receptor signaling	2	101	1.76991	1.10756	0.545562	1	1	1	RAC1; RPS6KA1;
Nephrin/Neph1 signaling in the kidney podocyte	2	25	1.76991	4.47318	0.073412	1	0.874652	1	RAC1; FYN;
CD40/CD40L signaling	1	58	0.884956	0.969065	0.652254	1	1	1	C4BPA;
TRAIL signaling pathway	37	1325	32.7434	1.55466	0.00237147	1	0.167686	0.817477	CDK6; HDAC3; IFNG; IL2; LIF; LTA; NCKAP1; PFKFB3; PRF1; RAC1; RPS6KA1; SLC2A1; SMPD1; TNFRSF18; TNFRSF4; TSG101; XRCC6; ZFP36L1; LAT; MSH2; IL2RA; GZMB; CREM; JUP; CAMSAP3; MMP12; KRT18; CCL5; KRT5; SMARCC1; BID; KRT1; RALB; KRT8; LRP1; CTSD; FYN;
LPA receptor mediated events	1	100	0.884956	0.562098	0.839167	1	1	1	RAC1;
IGF1 pathway	35	1288	30.9735	1.51289	0.00518887	1	0.167686	0.817477	CDK6; HDAC3; IFNG; IL2; LIF; LTA; NCKAP1; PFKFB3; PRF1; RAC1; RPS6KA1; SLC2A1; TNFRSF18; TNFRSF4; TSG101; XRCC6; ZFP36L1; LAT; MSH2; IL2RA; GZMB; CREM; JUP; CAMSAP3; MMP12; CCL5; KRT5; SMARCC1; BID; KRT1; RALB; KRT8; LRP1; CTSD; FYN;
PLK1 signaling events	1	104	0.884956	0.540481	0.850596	1	1	1	TPT1;
Lissencephaly gene (LIS1) in neuronal migration and development	2	31	1.76991	3.60769	0.106261	1	1	1	LRPAP1; RAC1;
ATF-2 transcription factor network	1	59	0.884956	0.952643	0.658559	1	1	1	IFNG;
HIF-1-alpha transcription factor network	2	66	1.76991	1.69481	0.333121	1	1	1	PFKFB3; SLC2A1;
CDC42 signaling events	22	755	19.469	1.62256	0.0140427	1	0.314552	1	CDK6; IFNG; IL2; LIF; NCKAP1; PFKFB3; PRF1; RAC1; SLC2A1; TNFRSF18; TNFRSF4; TSG101; XRCC6; IL2RA; GZMB; CREM; KRT5; SMARCC1; KRT1; RALB; KRT8; FYN;
PAR4-mediated thrombin signaling events	1	15	0.884956	3.7452	0.238322	1	1	1	F2RL3;
Syndecan-3-mediated signaling events	1	17	0.884956	3.30485	0.26551	1	1	1	FYN;
Signaling events mediated by Hepatocyte Growth Factor Receptor (c-Met)	35	1290	30.9735	1.51054	0.0053239	1	0.167686	0.817477	CDK6; HDAC3; IFNG; IL2; LIF; LTA; NCKAP1; PFKFB3; PRF1; RAC1; RPS6KA1; SLC2A1; TNFRSF18; TNFRSF4; TSG101; XRCC6; ZFP36L1; LAT; MSH2; IL2RA; GZMB; CREM; JUP; CAMSAP3; MMP12; CCL5; KRT5; SMARCC1; BID; KRT1; RALB; KRT8; LRP1; CTSD; FYN;
Glypican 1 network	35	1296	30.9735	1.50355	0.00574719	1	0.167686	0.817477	CDK6; HDAC3; IFNG; IL2; LIF; LTA; NCKAP1; PFKFB3; PRF1; RAC1; RPS6KA1; SLC2A1; TNFRSF18; TNFRSF4; TSG101; XRCC6; ZFP36L1; LAT; MSH2; IL2RA; GZMB; CREM; JUP; CAMSAP3; MMP12; CCL5; KRT5; SMARCC1; BID; KRT1; RALB; KRT8; LRP1; CTSD; FYN;
Validated targets of C-MYC transcriptional activation	1	81	0.884956	0.693932	0.771884	1	1	1	SLC2A1;
N-cadherin signaling events	8	251	7.07965	1.77613	0.0812794	1	0.94807	1	CDK6; RAC1; RPS6KA1; XRCC6; JUP; KRT1; FYN; LRP5;
VEGFR3 signaling in lymphatic endothelium	1	25	0.884956	2.24772	0.36497	1	1	1	RPS6KA1;
Fc-epsilon receptor I signaling in mast cells	2	61	1.76991	1.83371	0.299906	1	1	1	LAT; FYN;
PDGF receptor signaling network	35	1290	30.9735	1.51054	0.0053239	1	0.167686	0.817477	CDK6; HDAC3; IFNG; IL2; LIF; LTA; NCKAP1; PFKFB3; PRF1; RAC1; RPS6KA1; SLC2A1; TNFRSF18; TNFRSF4; TSG101; XRCC6; ZFP36L1; LAT; MSH2; IL2RA; GZMB; CREM; JUP; CAMSAP3; MMP12; CCL5; KRT5; SMARCC1; BID; KRT1; RALB; KRT8; LRP1; CTSD; FYN;
EphrinB-EPHB pathway	2	60	1.76991	1.86426	0.293227	1	1	1	RAC1; FYN;
Integrin family cell surface interactions	38	1375	33.6283	1.5386	0.00244315	1	0.167686	0.817477	CDK6; HDAC3; IFNG; IL2; LIF; LTA; NCKAP1; OSM; PFKFB3; PRF1; RAC1; RPS6KA1; SLC2A1; TNFRSF18; TNFRSF4; TSG101; XRCC6; ZFP36L1; LAT; MSH2; IL2RA; GZMB; CREM; JUP; CAMSAP3; TGFBI; MMP12; CCL5; KRT5; SMARCC1; BID; KRT1; RALB; KRT8; LRP1; C3; CTSD; FYN;
IL1-mediated signaling events	9	234	7.9646	2.14301	0.0243503	1	0.448185	1	IFNG; IL2; RAC1; IL2RA; CREM; RALB; KRT8; IL1B; FYN;
Caspase cascade in apoptosis	4	52	3.53982	4.29133	0.0137882	1	0.314552	1	PRF1; GZMB; KRT18; BID;
Calcineurin-regulated NFAT-dependent transcription in lymphocytes	4	49	3.53982	4.55401	0.0112418	1	0.267876	1	IFNG; IL2; IL2RA; CREM;
S1P2 pathway	1	26	0.884956	2.1613	0.376424	1	1	1	RAC1;
BARD1 signaling events	1	29	0.884956	1.9378	0.409571	1	1	1	XRCC6;
Coregulation of Androgen receptor activity	2	61	1.76991	1.83371	0.299906	1	1	1	CDK6; XRCC6;
Regulation of Telomerase	3	68	2.65487	2.46336	0.122713	1	1	1	IFNG; IL2; XRCC6;
Cellular roles of Anthrax toxin	2	22	1.76991	5.08289	0.0585089	1	0.744983	1	IL18; IL1B;
Internalization of ErbB1	35	1285	30.9735	1.51642	0.00499184	1	0.167686	0.817477	CDK6; HDAC3; IFNG; IL2; LIF; LTA; NCKAP1; PFKFB3; PRF1; RAC1; RPS6KA1; SLC2A1; TNFRSF18; TNFRSF4; TSG101; XRCC6; ZFP36L1; LAT; MSH2; IL2RA; GZMB; CREM; JUP; CAMSAP3; MMP12; CCL5; KRT5; SMARCC1; BID; KRT1; RALB; KRT8; LRP1; CTSD; FYN;
TGF-beta receptor signaling	8	305	7.07965	1.46168	0.181494	1	1	1	IFNG; IL2; RAC1; IL2RA; CREM; RALB; KRT8; FYN;
Posttranslational regulation of adherens junction stability and dissassembly	7	231	6.19469	1.68897	0.121063	1	1	1	CDK6; RAC1; RPS6KA1; XRCC6; JUP; KRT1; FYN;
BCR signaling pathway	1	67	0.884956	0.838912	0.705087	1	1	1	RAC1;
Signaling events mediated by TCPTP	1	92	0.884956	0.610971	0.813645	1	1	1	LTA;
Signaling events mediated by VEGFR1 and VEGFR2	35	1293	30.9735	1.50704	0.00553208	1	0.167686	0.817477	CDK6; HDAC3; IFNG; IL2; LIF; LTA; NCKAP1; PFKFB3; PRF1; RAC1; RPS6KA1; SLC2A1; TNFRSF18; TNFRSF4; TSG101; XRCC6; ZFP36L1; LAT; MSH2; IL2RA; GZMB; CREM; JUP; CAMSAP3; MMP12; CCL5; KRT5; SMARCC1; BID; KRT1; RALB; KRT8; LRP1; CTSD; FYN;
Beta1 integrin cell surface interactions	37	1348	32.7434	1.52813	0.00323974	1	0.167686	0.817477	CDK6; HDAC3; IFNG; IL2; LIF; LTA; NCKAP1; OSM; PFKFB3; PRF1; RAC1; RPS6KA1; SLC2A1; TNFRSF18; TNFRSF4; TSG101; XRCC6; ZFP36L1; LAT; MSH2; IL2RA; GZMB; CREM; JUP; CAMSAP3; TGFBI; MMP12; CCL5; KRT5; SMARCC1; BID; KRT1; RALB; KRT8; LRP1; CTSD; FYN;
Thromboxane A2 receptor signaling	2	54	1.76991	2.07136	0.253058	1	1	1	RAC1; FYN;
Urokinase-type plasminogen activator (uPA) and uPAR-mediated signaling	35	1285	30.9735	1.51642	0.00499184	1	0.167686	0.817477	CDK6; HDAC3; IFNG; IL2; LIF; LTA; NCKAP1; PFKFB3; PRF1; RAC1; RPS6KA1; SLC2A1; TNFRSF18; TNFRSF4; TSG101; XRCC6; ZFP36L1; LAT; MSH2; IL2RA; GZMB; CREM; JUP; CAMSAP3; MMP12; CCL5; KRT5; SMARCC1; BID; KRT1; RALB; KRT8; LRP1; CTSD; FYN;
Ras signaling in the CD4+ TCR pathway	4	42	3.53982	5.31283	0.00653575	1	0.170338	0.830406	IFNG; IL2; IL2RA; CREM;
Ceramide signaling pathway	3	49	2.65487	3.41835	0.0573045	1	0.744983	1	SMPD1; BID; CTSD;
Reelin signaling pathway	2	29	1.76991	3.85641	0.0949131	1	0.995692	1	LRPAP1; FYN;
Signaling mediated by p38-alpha and p38-beta	1	50	0.884956	1.12408	0.597476	1	1	1	KRT8;
S1P3 pathway	1	29	0.884956	1.9378	0.409571	1	1	1	RAC1;
Validated nuclear estrogen receptor alpha network	3	64	2.65487	2.6173	0.107247	1	1	1	HDAC4; C3; CTSD;
Polo-like kinase signaling events in the cell cycle	1	109	0.884956	0.515691	0.863756	1	1	1	TPT1;
IFN-gamma pathway	36	1293	31.8584	1.55009	0.00294035	1	0.167686	0.817477	CDK6; HDAC3; IFNG; IL2; LIF; LTA; NCKAP1; PFKFB3; PRF1; RAC1; RPS6KA1; SLC2A1; TNFRSF18; TNFRSF4; TSG101; XRCC6; ZFP36L1; LAT; MSH2; IL2RA; GZMB; CREM; JUP; CAMSAP3; MMP12; CCL5; KRT5; SMARCC1; BID; KRT1; RALB; KRT8; LRP1; IL1B; CTSD; FYN;
Regulation of RAC1 activity	3	205	2.65487	0.817195	0.718978	1	1	1	IFNG; NCKAP1; RAC1;
PAR1-mediated thrombin signaling events	35	1296	30.9735	1.50355	0.00574719	1	0.167686	0.817477	CDK6; HDAC3; IFNG; IL2; LIF; LTA; NCKAP1; PFKFB3; PRF1; RAC1; RPS6KA1; SLC2A1; TNFRSF18; TNFRSF4; TSG101; XRCC6; ZFP36L1; LAT; MSH2; IL2RA; GZMB; CREM; JUP; CAMSAP3; MMP12; CCL5; KRT5; SMARCC1; BID; KRT1; RALB; KRT8; LRP1; CTSD; FYN;
Beta3 integrin cell surface interactions	1	43	0.884956	1.30703	0.542582	1	1	1	TGFBI;
Noncanonical Wnt signaling pathway	4	182	3.53982	1.22626	0.414301	1	1	1	CDK6; RAC1; XRCC6; KRT1;
Regulation of p38-alpha and p38-beta	8	164	7.07965	2.7183	0.00906318	1	0.222314	1	IFNG; IL2; RAC1; IL2RA; CREM; RALB; KRT8; FYN;
Alpha4 beta1 integrin signaling events	1	33	0.884956	1.70298	0.451066	1	1	1	RAC1;
PDGFR-beta signaling pathway	35	1285	30.9735	1.51642	0.00499184	1	0.167686	0.817477	CDK6; HDAC3; IFNG; IL2; LIF; LTA; NCKAP1; PFKFB3; PRF1; RAC1; RPS6KA1; SLC2A1; TNFRSF18; TNFRSF4; TSG101; XRCC6; ZFP36L1; LAT; MSH2; IL2RA; GZMB; CREM; JUP; CAMSAP3; MMP12; CCL5; KRT5; SMARCC1; BID; KRT1; RALB; KRT8; LRP1; CTSD; FYN;
p63 transcription factor network	3	105	2.65487	1.5954	0.291994	1	1	1	TOP2A; KRT5; FASN;
Canonical Wnt signaling pathway	3	155	2.65487	1.08079	0.530879	1	1	1	CDK6; XRCC6; KRT1;
HIF-2-alpha transcription factor network	1	34	0.884956	1.65291	0.460979	1	1	1	SLC2A1;
E-cadherin signaling in the nascent adherens junction	9	275	7.9646	1.82352	0.0582802	1	0.744983	1	CDK6; NCKAP1; RAC1; RPS6KA1; XRCC6; JUP; CAMSAP3; KRT1; FYN;
EPHB forward signaling	1	40	0.884956	1.40504	0.516842	1	1	1	RAC1;
Integrin-linked kinase signaling	22	654	19.469	1.87314	0.0025991	1	0.167686	0.817477	CDK6; IFNG; IL2; LIF; PFKFB3; PRF1; RAC1; SLC2A1; TNFRSF18; TNFRSF4; TSG101; XRCC6; IL2RA; GZMB; CREM; PPP1R14A; KRT5; SMARCC1; KRT1; RALB; KRT8; FYN;
Regulation of nuclear beta catenin signaling and target gene transcription	3	135	2.65487	1.24089	0.439041	1	1	1	CDK6; XRCC6; KRT1;
Ephrin B reverse signaling	2	30	1.76991	3.7279	0.100542	1	1	1	RAC1; FYN;
p38 MAPK signaling pathway	8	189	7.07965	2.35875	0.019981	1	0.396766	1	IFNG; IL2; RAC1; IL2RA; CREM; RALB; KRT8; FYN;
EGF receptor (ErbB1) signaling pathway	35	1285	30.9735	1.51642	0.00499184	1	0.167686	0.817477	CDK6; HDAC3; IFNG; IL2; LIF; LTA; NCKAP1; PFKFB3; PRF1; RAC1; RPS6KA1; SLC2A1; TNFRSF18; TNFRSF4; TSG101; XRCC6; ZFP36L1; LAT; MSH2; IL2RA; GZMB; CREM; JUP; CAMSAP3; MMP12; CCL5; KRT5; SMARCC1; BID; KRT1; RALB; KRT8; LRP1; CTSD; FYN;
p75(NTR)-mediated signaling	2	178	1.76991	0.628472	0.83517	1	1	1	RAC1; RPS6KA1;
Thrombin/protease-activated receptor (PAR) pathway	36	1297	31.8584	1.54531	0.00310509	1	0.167686	0.817477	CDK6; F2RL3; HDAC3; IFNG; IL2; LIF; LTA; NCKAP1; PFKFB3; PRF1; RAC1; RPS6KA1; SLC2A1; TNFRSF18; TNFRSF4; TSG101; XRCC6; ZFP36L1; LAT; MSH2; IL2RA; GZMB; CREM; JUP; CAMSAP3; MMP12; CCL5; KRT5; SMARCC1; BID; KRT1; RALB; KRT8; LRP1; CTSD; FYN;
Class I PI3K signaling events	35	1285	30.9735	1.51642	0.00499184	1	0.167686	0.817477	CDK6; HDAC3; IFNG; IL2; LIF; LTA; NCKAP1; PFKFB3; PRF1; RAC1; RPS6KA1; SLC2A1; TNFRSF18; TNFRSF4; TSG101; XRCC6; ZFP36L1; LAT; MSH2; IL2RA; GZMB; CREM; JUP; CAMSAP3; MMP12; CCL5; KRT5; SMARCC1; BID; KRT1; RALB; KRT8; LRP1; CTSD; FYN;
Arf6 signaling events	35	1285	30.9735	1.51642	0.00499184	1	0.167686	0.817477	CDK6; HDAC3; IFNG; IL2; LIF; LTA; NCKAP1; PFKFB3; PRF1; RAC1; RPS6KA1; SLC2A1; TNFRSF18; TNFRSF4; TSG101; XRCC6; ZFP36L1; LAT; MSH2; IL2RA; GZMB; CREM; JUP; CAMSAP3; MMP12; CCL5; KRT5; SMARCC1; BID; KRT1; RALB; KRT8; LRP1; CTSD; FYN;
Plasma membrane estrogen receptor signaling	35	1298	30.9735	1.50123	0.00589454	1	0.167686	0.817477	CDK6; HDAC3; IFNG; IL2; LIF; LTA; NCKAP1; PFKFB3; PRF1; RAC1; RPS6KA1; SLC2A1; TNFRSF18; TNFRSF4; TSG101; XRCC6; ZFP36L1; LAT; MSH2; IL2RA; GZMB; CREM; JUP; CAMSAP3; MMP12; CCL5; KRT5; SMARCC1; BID; KRT1; RALB; KRT8; LRP1; CTSD; FYN;
FoxO family signaling	1	49	0.884956	1.14702	0.590053	1	1	1	RALB;
FAS (CD95) signaling pathway	6	130	5.30973	2.57295	0.0290624	1	0.504959	1	PRF1; SMPD1; GZMB; KRT18; BID; CTSD;
C-MYB transcription factor network	2	84	1.76991	1.33168	0.447854	1	1	1	CDK6; MCM4;
p73 transcription factor network	2	78	1.76991	1.4341	0.410692	1	1	1	CDK6; FASN;
Signaling events mediated by HDAC Class III	2	39	1.76991	2.86784	0.154718	1	1	1	XRCC6; HDAC4;
IL3-mediated signaling events	36	1292	31.8584	1.55129	0.00290037	1	0.167686	0.817477	CDK6; HDAC3; IFNG; IL2; LIF; LTA; NCKAP1; OSM; PFKFB3; PRF1; RAC1; RPS6KA1; SLC2A1; TNFRSF18; TNFRSF4; TSG101; XRCC6; ZFP36L1; LAT; MSH2; IL2RA; GZMB; CREM; JUP; CAMSAP3; MMP12; CCL5; KRT5; SMARCC1; BID; KRT1; RALB; KRT8; LRP1; CTSD; FYN;
AP-1 transcription factor network	21	621	18.5841	1.88305	0.0030921	1	0.167686	0.817477	CDK6; IFNG; IL2; LIF; PFKFB3; PRF1; RAC1; SLC2A1; TNFRSF18; TNFRSF4; TSG101; XRCC6; IL2RA; GZMB; CREM; KRT5; SMARCC1; KRT1; RALB; KRT8; FYN;
Signaling events regulated by Ret tyrosine kinase	1	69	0.884956	0.814599	0.715701	1	1	1	RAC1;
Hypoxic and oxygen homeostasis regulation of HIF-1-alpha	2	80	1.76991	1.39825	0.423218	1	1	1	PFKFB3; SLC2A1;
amb2 Integrin signaling	2	40	1.76991	2.79616	0.161047	1	1	1	LRP1; FYN;
Glucocorticoid receptor signaling	5	85	4.42478	3.28021	0.0179895	1	0.365934	1	IFNG; IL2; TSG101; KRT5; SMARCC1;
mTOR signaling pathway	35	1285	30.9735	1.51642	0.00499184	1	0.167686	0.817477	CDK6; HDAC3; IFNG; IL2; LIF; LTA; NCKAP1; PFKFB3; PRF1; RAC1; RPS6KA1; SLC2A1; TNFRSF18; TNFRSF4; TSG101; XRCC6; ZFP36L1; LAT; MSH2; IL2RA; GZMB; CREM; JUP; CAMSAP3; MMP12; CCL5; KRT5; SMARCC1; BID; KRT1; RALB; KRT8; LRP1; CTSD; FYN;
RAC1 signaling pathway	3	205	2.65487	0.817195	0.718978	1	1	1	IFNG; NCKAP1; RAC1;
ErbB receptor signaling network	35	1308	30.9735	1.48976	0.00668064	1	0.171435	0.835756	CDK6; HDAC3; IFNG; IL2; LIF; LTA; NCKAP1; PFKFB3; PRF1; RAC1; RPS6KA1; SLC2A1; TNFRSF18; TNFRSF4; TSG101; XRCC6; ZFP36L1; LAT; MSH2; IL2RA; GZMB; CREM; JUP; CAMSAP3; MMP12; CCL5; KRT5; SMARCC1; BID; KRT1; RALB; KRT8; LRP1; CTSD; FYN;
Signaling events mediated by focal adhesion kinase	35	1285	30.9735	1.51642	0.00499184	1	0.167686	0.817477	CDK6; HDAC3; IFNG; IL2; LIF; LTA; NCKAP1; PFKFB3; PRF1; RAC1; RPS6KA1; SLC2A1; TNFRSF18; TNFRSF4; TSG101; XRCC6; ZFP36L1; LAT; MSH2; IL2RA; GZMB; CREM; JUP; CAMSAP3; MMP12; CCL5; KRT5; SMARCC1; BID; KRT1; RALB; KRT8; LRP1; CTSD; FYN;
VEGF and VEGFR signaling network	35	1301	30.9735	1.49777	0.00612161	1	0.170181	0.82964	CDK6; HDAC3; IFNG; IL2; LIF; LTA; NCKAP1; PFKFB3; PRF1; RAC1; RPS6KA1; SLC2A1; TNFRSF18; TNFRSF4; TSG101; XRCC6; ZFP36L1; LAT; MSH2; IL2RA; GZMB; CREM; JUP; CAMSAP3; MMP12; CCL5; KRT5; SMARCC1; BID; KRT1; RALB; KRT8; LRP1; CTSD; FYN;
Glucocorticoid receptor regulatory network	5	80	4.42478	3.4852	0.0141435	1	0.314552	1	IFNG; IL2; TSG101; KRT5; SMARCC1;
Alpha9 beta1 integrin signaling events	36	1302	31.8584	1.53937	0.00332227	1	0.167686	0.817477	CDK6; HDAC3; IFNG; IL2; LIF; LTA; NCKAP1; OSM; PFKFB3; PRF1; RAC1; RPS6KA1; SLC2A1; TNFRSF18; TNFRSF4; TSG101; XRCC6; ZFP36L1; LAT; MSH2; IL2RA; GZMB; CREM; JUP; CAMSAP3; MMP12; CCL5; KRT5; SMARCC1; BID; KRT1; RALB; KRT8; LRP1; CTSD; FYN;
Syndecan-2-mediated signaling events	1	77	0.884956	0.729976	0.754501	1	1	1	RPS6KA1;
ALK1 pathway	8	324	7.07965	1.37597	0.225968	1	1	1	IFNG; IL2; RAC1; IL2RA; CREM; RALB; KRT8; FYN;
ErbB4 signaling events	1	32	0.884956	1.75618	0.440971	1	1	1	FYN;
Arf6 downstream pathway	35	1285	30.9735	1.51642	0.00499184	1	0.167686	0.817477	CDK6; HDAC3; IFNG; IL2; LIF; LTA; NCKAP1; PFKFB3; PRF1; RAC1; RPS6KA1; SLC2A1; TNFRSF18; TNFRSF4; TSG101; XRCC6; ZFP36L1; LAT; MSH2; IL2RA; GZMB; CREM; JUP; CAMSAP3; MMP12; CCL5; KRT5; SMARCC1; BID; KRT1; RALB; KRT8; LRP1; CTSD; FYN;
JNK signaling in the CD4+ TCR pathway	5	42	4.42478	6.63773	0.000857266	1	0.119643	0.583268	IFNG; IL2; LAT; IL2RA; CREM;
Role of Calcineurin-dependent NFAT signaling in lymphocytes	4	95	3.53982	2.34914	0.0909231	1	0.97845	1	IFNG; IL2; IL2RA; CREM;
IL4-mediated signaling events	1	62	0.884956	0.906555	0.676803	1	1	1	LTA;
HIV-1 Nef: Negative effector of Fas and TNF-alpha	1	35	0.884956	1.6057	0.470716	1	1	1	BID;
Ephrin A reverse signaling	1	3	0.884956	18.6762	0.0529409	1	0.700837	1	FYN;
Signaling events mediated by PTP1B	2	52	1.76991	2.15102	0.239684	1	1	1	LAT; FYN;
Validated transcriptional targets of AP1 family members Fra1 and Fra2	9	134	7.9646	3.74216	0.000633371	1	0.117385	0.572257	IFNG; IL2; LIF; PRF1; TNFRSF18; TNFRSF4; IL2RA; GZMB; CREM;
CXCR4-mediated signaling events	8	190	7.07965	2.34634	0.0205554	1	0.40337	1	IFNG; IL2; RAC1; LAT; IL2RA; CREM; RALB; FYN;
S1P1 pathway	35	1285	30.9735	1.51642	0.00499184	1	0.167686	0.817477	CDK6; HDAC3; IFNG; IL2; LIF; LTA; NCKAP1; PFKFB3; PRF1; RAC1; RPS6KA1; SLC2A1; TNFRSF18; TNFRSF4; TSG101; XRCC6; ZFP36L1; LAT; MSH2; IL2RA; GZMB; CREM; JUP; CAMSAP3; MMP12; CCL5; KRT5; SMARCC1; BID; KRT1; RALB; KRT8; LRP1; CTSD; FYN;
Alpha-synuclein signaling	1	33	0.884956	1.70298	0.451066	1	1	1	FYN;
Netrin-mediated signaling events	2	32	1.76991	3.49498	0.112067	1	1	1	RAC1; FYN;
EPHA2 forward signaling	1	19	0.884956	2.95715	0.291735	1	1	1	RAC1;
ATM pathway	5	307	4.42478	0.90828	0.652859	1	1	1	LIF; MSH2; RRM1; BID; CTSD;
TNF receptor signaling pathway	14	299	12.3894	2.60788	0.000860745	1	0.119643	0.583268	IFNG; IL2; PRF1; RAC1; SMPD1; IL2RA; GZMB; CREM; KRT18; BID; RALB; KRT8; CTSD; FYN;
p53 pathway	4	189	3.53982	1.18085	0.442683	1	1	1	LIF; MSH2; BID; CTSD;
ErbB1 downstream signaling	35	1285	30.9735	1.51642	0.00499184	1	0.167686	0.817477	CDK6; HDAC3; IFNG; IL2; LIF; LTA; NCKAP1; PFKFB3; PRF1; RAC1; RPS6KA1; SLC2A1; TNFRSF18; TNFRSF4; TSG101; XRCC6; ZFP36L1; LAT; MSH2; IL2RA; GZMB; CREM; JUP; CAMSAP3; MMP12; CCL5; KRT5; SMARCC1; BID; KRT1; RALB; KRT8; LRP1; CTSD; FYN;
EGFR-dependent Endothelin signaling events	35	1286	30.9735	1.51524	0.00505679	1	0.167686	0.817477	CDK6; HDAC3; IFNG; IL2; LIF; LTA; NCKAP1; PFKFB3; PRF1; RAC1; RPS6KA1; SLC2A1; TNFRSF18; TNFRSF4; TSG101; XRCC6; ZFP36L1; LAT; MSH2; IL2RA; GZMB; CREM; JUP; CAMSAP3; MMP12; CCL5; KRT5; SMARCC1; BID; KRT1; RALB; KRT8; LRP1; CTSD; FYN;
Syndecan-4-mediated signaling events	5	209	4.42478	1.33415	0.322027	1	1	1	CDK6; RAC1; XRCC6; CCL5; KRT1;
Nongenotropic Androgen signaling	1	26	0.884956	2.1613	0.376424	1	1	1	RAC1;
ATR signaling pathway	4	250	3.53982	0.892733	0.663614	1	1	1	LIF; MSH2; BID; CTSD;
Regulation of nuclear SMAD2/3 signaling	8	305	7.07965	1.46168	0.181494	1	1	1	IFNG; IL2; RAC1; IL2RA; CREM; RALB; KRT8; FYN;
ALK1 signaling events	8	321	7.07965	1.38883	0.218683	1	1	1	IFNG; IL2; RAC1; IL2RA; CREM; RALB; KRT8; FYN;
PDGFR-alpha signaling pathway	1	21	0.884956	2.67565	0.317032	1	1	1	IFNG;
Angiopoietin receptor Tie2-mediated signaling	2	50	1.76991	2.23704	0.226349	1	1	1	RAC1; FYN;
Arf6 trafficking events	35	1285	30.9735	1.51642	0.00499184	1	0.167686	0.817477	CDK6; HDAC3; IFNG; IL2; LIF; LTA; NCKAP1; PFKFB3; PRF1; RAC1; RPS6KA1; SLC2A1; TNFRSF18; TNFRSF4; TSG101; XRCC6; ZFP36L1; LAT; MSH2; IL2RA; GZMB; CREM; JUP; CAMSAP3; MMP12; CCL5; KRT5; SMARCC1; BID; KRT1; RALB; KRT8; LRP1; CTSD; FYN;
E-cadherin signaling events	9	280	7.9646	1.79096	0.0638468	1	0.788863	1	CDK6; NCKAP1; RAC1; RPS6KA1; XRCC6; JUP; CAMSAP3; KRT1; FYN;
Androgen-mediated signaling	4	130	3.53982	1.71673	0.205162	1	1	1	CDK6; RAC1; XRCC6; SMARCC1;
Endothelins	35	1304	30.9735	1.49433	0.0063561	1	0.170338	0.830406	CDK6; HDAC3; IFNG; IL2; LIF; LTA; NCKAP1; PFKFB3; PRF1; RAC1; RPS6KA1; SLC2A1; TNFRSF18; TNFRSF4; TSG101; XRCC6; ZFP36L1; LAT; MSH2; IL2RA; GZMB; CREM; JUP; CAMSAP3; MMP12; CCL5; KRT5; SMARCC1; BID; KRT1; RALB; KRT8; LRP1; CTSD; FYN;
a6b1 and a6b4 Integrin signaling	1	35	0.884956	1.6057	0.470716	1	1	1	RAC1;
Regulation of retinoblastoma protein	2	66	1.76991	1.69481	0.333121	1	1	1	CDK6; HDAC3;
TCR signaling in na&#xef;ve CD4+ T cells	6	133	5.30973	2.51492	0.0320166	1	0.525643	1	IFNG; IL2; LAT; IL2RA; CREM; FYN;
Notch signaling pathway	1	94	0.884956	0.597973	0.820379	1	1	1	NOTCH2;
E2F transcription factor network	1	73	0.884956	0.769969	0.735806	1	1	1	RRM1;
IL5-mediated signaling events	35	1289	30.9735	1.51172	0.00525601	1	0.167686	0.817477	CDK6; HDAC3; IFNG; IL2; LIF; LTA; NCKAP1; PFKFB3; PRF1; RAC1; RPS6KA1; SLC2A1; TNFRSF18; TNFRSF4; TSG101; XRCC6; ZFP36L1; LAT; MSH2; IL2RA; GZMB; CREM; JUP; CAMSAP3; MMP12; CCL5; KRT5; SMARCC1; BID; KRT1; RALB; KRT8; LRP1; CTSD; FYN;
IL23-mediated signaling events	4	66	3.53982	3.38119	0.0303532	1	0.511406	1	IFNG; IL18; IL2; IL1B;
Direct p53 effectors	4	138	3.53982	1.61722	0.235668	1	1	1	LIF; MSH2; BID; CTSD;
Retinoic acid receptors-mediated signaling	1	47	0.884956	1.19582	0.574799	1	1	1	HDAC3;
E-cadherin signaling in keratinocytes	3	21	2.65487	7.97398	0.00593133	1	0.167686	0.817477	RAC1; JUP; FYN;
IL12-mediated signaling events	8	111	7.07965	4.0161	0.000803386	1	0.119643	0.583268	GZMA; IFNG; IL18; IL2; PRF1; IL2RA; GZMB; IL1B;
IL2 signaling events mediated by PI3K	4	67	3.53982	3.33073	0.0318471	1	0.525643	1	IL2; RAC1; SMPD1; IL2RA;
Sphingosine 1-phosphate (S1P) pathway	36	1308	31.8584	1.53231	0.00360019	1	0.167686	0.817477	CDK6; HDAC3; IFNG; IL2; LIF; LTA; NCKAP1; PFKFB3; PRF1; RAC1; RPS6KA1; SLC2A1; SMPD1; TNFRSF18; TNFRSF4; TSG101; XRCC6; ZFP36L1; LAT; MSH2; IL2RA; GZMB; CREM; JUP; CAMSAP3; MMP12; CCL5; KRT5; SMARCC1; BID; KRT1; RALB; KRT8; LRP1; CTSD; FYN;
Regulation of Androgen receptor activity	3	108	2.65487	1.55109	0.306802	1	1	1	CDK6; XRCC6; SMARCC1;
Proteoglycan syndecan-mediated signaling events	36	1342	31.8584	1.49349	0.00558681	1	0.167686	0.817477	CDK6; HDAC3; IFNG; IL2; LIF; LTA; NCKAP1; PFKFB3; PRF1; RAC1; RPS6KA1; SLC2A1; TNFRSF18; TNFRSF4; TSG101; XRCC6; ZFP36L1; LAT; MSH2; IL2RA; GZMB; CREM; JUP; CAMSAP3; MMP12; CCL5; KRT5; SMARCC1; BID; KRT1; RALB; KRT8; HPSE; LRP1; CTSD; FYN;
Calcium signaling in the CD4+ TCR pathway	4	29	3.53982	7.69363	0.00165844	1	0.167686	0.817477	IFNG; IL2; IL2RA; CREM;
BMP receptor signaling	8	226	7.07965	1.9726	0.0498462	1	0.692863	1	IFNG; IL2; RAC1; IL2RA; CREM; RALB; KRT8; FYN;
RhoA signaling pathway	3	205	2.65487	0.817195	0.718978	1	1	1	IFNG; NCKAP1; RAC1;
Class I PI3K signaling events mediated by Akt	35	1285	30.9735	1.51642	0.00499184	1	0.167686	0.817477	CDK6; HDAC3; IFNG; IL2; LIF; LTA; NCKAP1; PFKFB3; PRF1; RAC1; RPS6KA1; SLC2A1; TNFRSF18; TNFRSF4; TSG101; XRCC6; ZFP36L1; LAT; MSH2; IL2RA; GZMB; CREM; JUP; CAMSAP3; MMP12; CCL5; KRT5; SMARCC1; BID; KRT1; RALB; KRT8; LRP1; CTSD; FYN;
LKB1 signaling events	35	1305	30.9735	1.49318	0.00643595	1	0.170338	0.830406	CDK6; HDAC3; IFNG; IL2; LIF; LTA; NCKAP1; PFKFB3; PRF1; RAC1; RPS6KA1; SLC2A1; TNFRSF18; TNFRSF4; TSG101; XRCC6; ZFP36L1; LAT; MSH2; IL2RA; GZMB; CREM; JUP; CAMSAP3; MMP12; CCL5; KRT5; SMARCC1; BID; KRT1; RALB; KRT8; LRP1; CTSD; FYN;
Regulation of RhoA activity	3	205	2.65487	0.817195	0.718978	1	1	1	IFNG; NCKAP1; RAC1;
Signaling events mediated by PRL	1	23	0.884956	2.44309	0.341433	1	1	1	RAC1;
Trk receptor signaling mediated by the MAPK pathway	1	34	0.884956	1.65291	0.460979	1	1	1	RPS6KA1;
Trk receptor signaling mediated by PI3K and PLC-gamma	1	63	0.884956	0.892167	0.682667	1	1	1	RPS6KA1;
DNA-PK pathway in nonhomologous end joining	2	13	1.76991	8.5991	0.021928	1	0.420412	1	PNKP; XRCC6;
Wnt	5	82	4.42478	3.40021	0.0156079	1	0.342553	1	RAC1; PPP2R5B; JUP; LRP1; LRP5;
KitReceptor	2	54	1.76991	2.07136	0.253058	1	1	1	RPS6KA1; FYN;
Alpha6Beta4Integrin	2	48	1.76991	2.33023	0.213074	1	1	1	RAC1; FYN;
TNF alpha/NF-kB	1	171	0.884956	0.328726	0.956847	1	1	1	SMARCC1;
TGFBR	1	125	0.884956	0.449688	0.898621	1	1	1	CDK6;
EGFR1	7	138	6.19469	2.8271	0.011775	1	0.276629	1	APPL2; RAC1; RPS6KA1; SHOC2; KRT18; RALB; KRT8;
NOTCH	1	57	0.884956	0.986063	0.645833	1	1	1	NOTCH2;
Mesenchymal-to-epithelial transition	5	223	4.42478	1.2504	0.372317	1	1	1	RBM47; JUP; KRT18; KRT8; CTSH;
Epithelial-to-mesenchymal transition	4	185	3.53982	1.20638	0.426506	1	1	1	OLFML2B; MRC1; FYN; GUCY1B3;

## Sheet: Protein domain
Analysis: Protein domain
Dataset name: BanLecsecretomep005
Number of genes in the dataset: 217
Number of genes in the dataset (which are available in Protein domain database) :181
Number of genes in background: 14847
Is analysis quantitative: No
						Corrected p-values
Protein domain	No. of genes in the dataset	No. of genes in the background dataset	Percentage of genes	Fold enrichment	P-value (Hypergeometric test)	Bonferroni method	BH method	Q-value (Storey-Tibshirani method)	genes mapped (from input data set)
signal peptide	78	3668	43.0939	1.74444	4.02307e-08	3.90238e-05	3.90238e-05	0.000238612	ACSL5; ADPGK; CD226; CD27; F2RL3; FAM45A; GZMA; IFNG; LIF; LRPAP1; LTA; M6PR; MMP8; OSM; PRF1; SEMA3F; SEMA4D; SIGLEC5; TNFRSF18; TNFRSF4; TRMT1; CXCL10; FKBP9; LAT; ICOS; IL2RA; LAG3; GZMB; NAAA; NOTCH2; OLFML2B; TCN2; LDLRAD2; GZMH; TGFBI; C1QB; C1QA; MMP12; CST7; FOLR1; SMPDL3A; MRC1; CTSW; CSF3; XCL2; CCL5; TIMP2; AOAH; STAB1; OLFM1; CFD; CTSS; LIPG; SLC1A5; GM2A; RNASE6; PLBD2; CTSA; CFP; HP…
Pept_C1	4	13	2.20994	25.2815	1.40196e-05	0.013599	0.00679952	0.0415758	CTSW; CTSS; CTSH; CTSC;
Inhibitor_I29	3	7	1.65746	35.2196	6.01676e-05	0.0583626	0.0194542	0.118953	CTSW; CTSS; CTSH;
LIF_OSM	2	2	1.10497	82.0231	0.00014781	0.143375	0.0358439	0.219168	LIF; OSM;
FAS1	2	4	1.10497	41.1138	0.000872664	0.846484	0.169297	1	TGFBI; STAB1;
coiled coil region	36	2968	19.8895	0.995163	0.54363	1	1	1	ATRX; BICD2; CNOT10; KIAA1033; LRPAP1; NUP62; PAF1; POLE3; RECQL; SP100; SRP72; THOC2; TUBA1C; CCDC9; SDE2; OLFML2B; SYTL4; CAMSAP3; HDAC4; GFAP; KRT18; KRT5; KRT75; KRT79; SMARCC1; KRT1; OLFM1; CEP128; GBP2; KRT8; KRT77; VPS13A; NUB1; IQCE; GUCY1B3; KRT10;
UBCc	1	42	0.552486	1.97199	0.403029	1	1	1	TSG101;
transmembrane domain	41	4771	22.6519	0.705043	0.998193	1	1	1	ACSL5; ARL6IP1; ATP2B4; CD226; CD27; CHST11; CLEC1B; F2RL3; M6PR; SEMA4D; SIGLEC5; SLC2A1; SLC31A1; SMPD1; TNFRSF18; TNFRSF4; TSPAN5; KIAA0040; LAT; ICOS; IL2RA; LAG3; CD300C; ESYT2; NOTCH2; CD69; FOLR1; MRC1; SLC29A1; STAB1; SLC1A5; B4GALT5; PLBD2; LRP1; GNS; SLC7A1; NEU1; CD320; MERTK; LRP5; SLC44A1;
TPR	1	93	0.552486	0.890693	0.681554	1	1	1	CNOT10;
RhoGAP	1	65	0.552486	1.27432	0.55023	1	1	1	ARHGAP18;
IG	7	340	3.8674	1.69107	0.122623	1	1	1	SEMA3F; SEMA4D; SIGLEC5; LAG3; CD300C; SPEG; MERTK;
ZnF_C2H2	2	799	1.10497	0.206339	0.999519	1	1	1	ZNF706; ZNF662;
EFh	2	144	1.10497	1.14483	0.526307	1	1	1	FKBP9; PPP3R1;
S_TKc	3	307	1.65746	0.804175	0.726494	1	1	1	CDK6; RPS6KA1; OXSR1;
ZnMc	2	29	1.10497	5.68309	0.0483945	1	1	1	MMP8; MMP12;
HX	2	23	1.10497	7.16499	0.0316179	1	1	1	MMP8; MMP12;
DEXDc	2	112	1.10497	1.47189	0.397411	1	1	1	ATRX; RECQL;
HELICc	2	111	1.10497	1.48515	0.393112	1	1	1	ATRX; RECQL;
RRM	5	221	2.76243	1.85935	0.133567	1	1	1	HNRNPH3; SRSF12; NCBP2; RBM47; RBM3;
Sema	2	30	1.10497	5.49372	0.0514455	1	1	1	SEMA3F; SEMA4D;
PSI	2	44	1.10497	3.74612	0.100315	1	1	1	SEMA3F; SEMA4D;
RING	2	311	1.10497	0.5301	0.895839	1	1	1	ATRX; SYTL4;
SH3	1	216	0.552486	0.383516	0.930674	1	1	1	FYN;
PTB	1	36	0.552486	2.30057	0.357313	1	1	1	APPL2;
SPEC	1	32	0.552486	2.58805	0.324919	1	1	1	KRT77;
LRR	2	233	1.10497	0.707551	0.779999	1	1	1	LRRC47; SHOC2;
LRR_TYP	2	132	1.10497	1.24889	0.480107	1	1	1	LRRC47; SHOC2;
IGc2	3	211	1.65746	1.17004	0.476501	1	1	1	CD226; SIGLEC5; SPEG;
IG_like	3	128	1.65746	1.92867	0.205273	1	1	1	CD226; SEMA4D; SIGLEC5;
ANK	2	249	1.10497	0.662088	0.810411	1	1	1	PPP1R16B; NOTCH2;
FN3	2	187	1.10497	0.881592	0.668155	1	1	1	SPEG; MERTK;
KRAB	1	376	0.552486	0.220322	0.990643	1	1	1	ZNF662;
WD40	1	269	0.552486	0.307957	0.964202	1	1	1	WDR4;
EGF	5	208	2.76243	1.97556	0.110995	1	1	1	NOTCH2; STAB1; LRP1; THBS3; LRP5;
EGF_like	2	87	1.10497	1.8948	0.286712	1	1	1	STAB1; LRP1;
Cation_ATPase_N	1	18	0.552486	4.59985	0.198214	1	1	1	ATP2B4;
VIT	1	9	0.552486	9.1946	0.104545	1	1	1	ITIH4;
VWA	1	84	0.552486	0.986113	0.64415	1	1	1	ITIH4;
SANT	1	49	0.552486	1.69034	0.452291	1	1	1	SMARCC1;
FN2	1	14	0.552486	5.91316	0.157851	1	1	1	MRC1;
Tryp_SPc	4	115	2.20994	2.85986	0.0521386	1	1	1	GZMA; GZMB; GZMH; CFD;
EGF_CA	3	98	1.65746	2.51903	0.11771	1	1	1	NOTCH2; LRP1; THBS3;
AAA	1	145	0.552486	0.571294	0.832588	1	1	1	MCM4;
CCP	2	55	1.10497	2.99703	0.1447	1	1	1	IL2RA; C4BPA;
IQ	1	84	0.552486	0.986113	0.64415	1	1	1	IQCE;
PDZ	1	150	0.552486	0.552252	0.842644	1	1	1	GORASP2;
RAB	1	64	0.552486	1.29423	0.544655	1	1	1	RAB3D;
PH	2	278	1.10497	0.593024	0.856143	1	1	1	APPL2; FAM129B;
S_TK_X	1	56	0.552486	1.47908	0.497508	1	1	1	RPS6KA1;
C2	3	138	1.65746	1.78893	0.237199	1	1	1	PRF1; ESYT2; SYTL4;
FBOX	1	52	0.552486	1.59284	0.472145	1	1	1	FBXO7;
HATPase_c	1	18	0.552486	4.59985	0.198214	1	1	1	TOP2A;
C1Q	2	28	1.10497	5.88599	0.0454126	1	1	1	C1QB; C1QA;
LIM	2	73	1.10497	2.25814	0.223476	1	1	1	PRICKLE2; LIMD1;
SH2	1	111	0.552486	0.74627	0.745032	1	1	1	FYN;
TyrKc	2	88	1.10497	1.87327	0.291229	1	1	1	FYN; MERTK;
LINK	1	14	0.552486	5.91316	0.157851	1	1	1	STAB1;
CHROMO	1	34	0.552486	2.43585	0.341314	1	1	1	SMARCC1;
STYKc	1	48	0.552486	1.72554	0.445509	1	1	1	SPEG;
TSP1	1	64	0.552486	1.29423	0.544655	1	1	1	CFP;
ARM	1	29	0.552486	2.85568	0.299562	1	1	1	JUP;
PHD	1	92	0.552486	0.900374	0.677599	1	1	1	SP100;
BRLZ	1	52	0.552486	1.59284	0.472145	1	1	1	CREM;
CYCc	1	18	0.552486	4.59985	0.198214	1	1	1	GUCY1B3;
MCM	1	9	0.552486	9.1946	0.104545	1	1	1	MCM4;
TSPN	1	26	0.552486	3.18506	0.273259	1	1	1	THBS3;
ZnF_C3H1	2	44	1.10497	3.74612	0.100315	1	1	1	TRMT1; ZFP36L1;
CLECT	3	86	1.65746	2.87048	0.0877531	1	1	1	CLEC1B; CD69; MRC1;
LDLa	4	47	2.20994	6.99666	0.00253221	1	0.350891	1	LDLRAD2; LRP1; CD320; LRP5;
TNFR	3	26	1.65746	9.49211	0.00376936	1	0.457035	1	CD27; TNFRSF18; TNFRSF4;
TNF	1	18	0.552486	4.59985	0.198214	1	1	1	LTA;
OLF	2	13	1.10497	12.6723	0.0105542	1	0.695605	1	OLFML2B; OLFM1;
SCY	3	44	1.65746	5.60985	0.016367	1	0.793802	1	CXCL10; XCL2; CCL5;
SAP	1	23	0.552486	3.60032	0.245973	1	1	1	XRCC6;
Tubulin	1	23	0.552486	3.60032	0.245973	1	1	1	TUBA1C;
Tubulin_C	1	22	0.552486	3.7639	0.236653	1	1	1	TUBA1C;
EGF_Lam	1	33	0.552486	2.50964	0.333167	1	1	1	STAB1;
PGAM	1	10	0.552486	8.27606	0.115468	1	1	1	PFKFB3;
DHDPS	1	2	0.552486	41.2156	0.0242342	1	0.839543	1	NPL;
RHO	1	20	0.552486	4.1401	0.217669	1	1	1	RAC1;
RNAse_Pc	2	9	1.10497	18.2982	0.00502968	1	0.542087	1	RNASE6; ANG;
SAND	1	8	0.552486	10.3425	0.0934878	1	1	1	SP100;
HMG	1	51	0.552486	1.62406	0.465608	1	1	1	SP100;
LisH	1	28	0.552486	2.95764	0.290901	1	1	1	FGFR1OP;
BROMO	1	43	0.552486	1.92614	0.410327	1	1	1	SP100;
IBN_N	2	16	1.10497	10.2977	0.0158534	1	0.793802	1	IPO11; TNPO2;
B3_4	1	2	0.552486	41.2156	0.0242342	1	0.839543	1	LRRC47;
LY	2	15	1.10497	10.9838	0.0139827	1	0.753511	1	LRP1; LRP5;
PI3Ka	1	9	0.552486	9.1946	0.104545	1	1	1	PI4KA;
PI3Kc	1	16	0.552486	5.17448	0.178279	1	1	1	PI4KA;
RICIN	1	28	0.552486	2.95764	0.290901	1	1	1	MRC1;
UBA	1	32	0.552486	2.58805	0.324919	1	1	1	NUB1;
RAS	1	23	0.552486	3.60032	0.245973	1	1	1	RALB;
NL	1	7	0.552486	11.8179	0.0822947	1	1	1	NOTCH2;
CY	1	17	0.552486	4.87028	0.188308	1	1	1	CST7;
ML	1	4	0.552486	20.6592	0.0478843	1	1	1	GM2A;
SapB	2	6	1.10497	27.432	0.00214681	1	0.347068	1	SMPD1; AOAH;
C345C	1	17	0.552486	4.87028	0.188308	1	1	1	C3;
MUTSd	1	5	0.552486	16.5356	0.0594947	1	1	1	MSH2;
MUTSac	1	5	0.552486	16.5356	0.0594947	1	1	1	MSH2;
MACPF	1	12	0.552486	6.89787	0.136918	1	1	1	PRF1;
A2M_N_2	1	9	0.552486	9.1946	0.104545	1	1	1	C3;
ANATO	1	7	0.552486	11.8179	0.0822947	1	1	1	C3;
A2M	1	9	0.552486	9.1946	0.104545	1	1	1	C3;
A2M_recep	1	9	0.552486	9.1946	0.104545	1	1	1	C3;
NTR	1	4	0.552486	20.6592	0.0478843	1	1	1	TIMP2;
LH2	1	16	0.552486	5.17448	0.178279	1	1	1	LIPG;
TOP2c	1	2	0.552486	41.2156	0.0242342	1	0.839543	1	TOP2A;
TOP4c	1	2	0.552486	41.2156	0.0242342	1	0.839543	1	TOP2A;
IL1	2	10	1.10497	16.4702	0.0062369	1	0.604979	1	IL18; IL1B;
IL6	1	2	0.552486	41.2156	0.0242342	1	0.839543	1	CSF3;
DBB	1	2	0.552486	41.2156	0.0242342	1	0.839543	1	PIK3AP1;
PKS_ER	1	1	0.552486	82.0231	0.012191	1	0.695605	1	FASN;
PKS_KR	1	1	0.552486	82.0231	0.012191	1	0.695605	1	FASN;
NOD	1	4	0.552486	20.6592	0.0478843	1	1	1	NOTCH2;
NODP	1	4	0.552486	20.6592	0.0478843	1	1	1	NOTCH2;
EZ_HEAT	1	1	0.552486	82.0231	0.012191	1	0.695605	1	DOHH;
DUF3454	1	3	0.552486	27.5227	0.0361314	1	1	1	NOTCH2;
CAMSAP_CKK	1	3	0.552486	27.5227	0.0361314	1	1	1	CAMSAP3;
IL2	1	1	0.552486	82.0231	0.012191	1	0.695605	1	IL2;
Ku78	1	2	0.552486	41.2156	0.0242342	1	0.839543	1	XRCC6;
CoA_binding	1	1	0.552486	82.0231	0.012191	1	0.695605	1	SUCLG1;
RPOLD	1	2	0.552486	41.2156	0.0242342	1	0.839543	1	POLR1C;
Pro-kuma_activ	1	1	0.552486	82.0231	0.012191	1	0.695605	1	TPP1;

## Sheet: Site of expression
Analysis: Site of expression
Dataset name: BanLecsecretomep005
Number of genes in the dataset: 217
Number of genes in the dataset (which are available in Site of expression database) :217
Number of genes in background: 18297
Is analysis quantitative: No
						Corrected p-values
Site of expression	No. of genes in the dataset	No. of genes in the background dataset	Percentage of genes	Fold enrichment	P-value (Hypergeometric test)	Bonferroni method	BH method	Q-value (Storey-Tibshirani method)	genes mapped (from input data set)
CRC	108	4247	49.7696	2.14428	9.56391e-18	8.11019e-15	8.11019e-15	3.19239e-14	ACSL5; ARL6IP1; CDK6; CNOT10; GLRX; GORASP2; GZMA; HNRNPH3; IL18; IPO11; KIAA1033; LIF; LRRC47; NCKAP1; NUP62; PMVK; POLE3; RAB3D; RAC1; SEMA3F; SEMA4D; SLC2A1; SP100; SRP72; SRSF12; SUCLG1; THOC2; TNPO2; TOP2A; TUBA1C; URM1; XRCC6; ZNF706; CLUH; DCK; MSH2; NCBP2; NUP85; POLR1C; RBM47; GZMB; ARHGAP18; ESYT2; ITIH4; JUP; NOTCH2; OLFML2B; TCN2; CAMSAP3; SPEG; GZMH; TGFBI; GFAP; SMPDL3A; RRM1; CSF3;…
H293	135	6792	62.212	1.67598	4.39177e-14	3.72422e-11	1.86211e-11	7.32977e-11	ACSL5; ADPGK; APPL2; ARL6IP1; ATP2B4; ATRX; BICD2; CDK6; CLN5; CNOT10; DOHH; EFR3A; EXOSC5; FAM45A; FBXO7; FGFR1OP; GLRX; GORASP2; HDAC3; HEATR5B; HNRNPH3; IPO11; KIAA1033; LRPAP1; LRRC47; M6PR; MMP8; NCKAP1; NUDCD1; NUP62; PAF1; PI4KA; PMVK; PNKP; POLE3; PRPSAP1; RAC1; RANGRF; RECQL; RNMT; RPS6KA1; SEMA4D; SHOC2; SLC2A1; SP100; SRP72; THOC2; TNPO2; TOP2A; TRMT1; TSG101; TUBA1C; URM1; WBSCR22; WD…
CD8	86	3327	39.6313	2.17969	8.70901e-14	7.38524e-11	2.46175e-11	9.6901e-11	ARL6IP1; ATP2B4; ATRX; CDK6; DOHH; EXOSC5; FBXO7; FGFR1OP; GLRX; GORASP2; GZMA; HNRNPH3; KIAA1033; LRRC47; M6PR; NUDCD1; NUP62; PI4KA; PMVK; POLE3; PRF1; RAC1; RECQL; RNMT; SEMA4D; SHOC2; SRP72; THOC2; TOP2A; TUBA1C; WDR4; CLUH; DCK; MSH2; NUP85; POLR1C; ESYT2; ITIH4; NAAA; PPP1R14A; LIMD1; GZMH; GFAP; C1QB; C1QA; CTSW; RRM1; KRT18; PHGDH; CCL5; FAM129B; KRT5; KRT75; KRT79; SMARCC1; BID; OXSR1; K…
RMUG	30	499	13.8249	5.07057	2.54076e-13	2.15456e-10	5.38641e-11	2.12024e-10	CHST11; CLN5; SEMA3F; TUBA1C; TGFBI; SMPDL3A; TIMP2; FAM129B; CFD; SLC1A5; GM2A; B4GALT5; KRT8; PLBD2; CTSA; PSAT1; HSPA13; GNS; CTSH; ST8SIA4; GLA; SCPEP1; LIPA; TPP1; GGH; CTSD; CTSC; HEXA; FASN; SLC44A1;
Semen	41	966	18.894	3.57939	8.02695e-13	6.80686e-10	1.36137e-10	5.35873e-10	CLN5; GLRX; RAB3D; RAC1; SEMA3F; SLC31A1; SMPD1; TSG101; TUBA1C; NAAA; SMPDL3A; PHGDH; TIMP2; KRT5; KRT1; OLFM1; RALB; LIPG; GM2A; KRT8; PLBD2; CTSA; PSAT1; HSPA13; GNS; C3; CTSH; GLA; SCPEP1; LIPA; ANG; TPP1; GGH; NEU1; TPT1; MIF; CTSD; HEXA; FASN; KRT10; NAGA;
ES2	86	3527	39.6313	2.05609	2.48483e-12	2.10714e-09	3.51189e-10	1.38238e-09	ARL6IP1; ATP2B4; BICD2; CHST11; CNOT10; DOHH; EXOSC5; FGFR1OP; GLRX; GORASP2; HNRNPH3; IPO11; LIF; LRPAP1; LRRC47; M6PR; NCKAP1; NUDCD1; NUP62; PMVK; POLE3; PRPSAP1; RAC1; RECQL; RNMT; SLC2A1; SP100; SRP72; TOP2A; TRMT1; TSG101; TUBA1C; ZNF706; CCDC9; CLUH; MSH2; NCBP2; POLR1C; RBM47; SDE2; ARHGAP18; CREM; ESYT2; ITIH4; NOTCH2; C1QB; C1QA; KRT18; PHGDH; TIMP2; FAM129B; KRT5; SMARCC1; BID; OXSR1; …
H358	51	1489	23.5023	2.8884	2.98572e-12	2.53189e-09	3.61698e-10	1.42374e-09	CDK6; CLN5; EXOSC5; GORASP2; HNRNPH3; NUP62; RNMT; SLC2A1; SMPD1; TNPO2; TOP2A; TSG101; TUBA1C; WDR4; XRCC6; MSH2; ITIH4; JUP; TGFBI; KRT18; PHGDH; TIMP2; FAM129B; SMARCC1; BID; KRT1; ASNS; CTSS; SLC1A5; GM2A; B4GALT5; KRT8; PLBD2; CTSA; PSAT1; MCM4; HSPA13; GNS; CTSH; GLA; TPP1; GGH; NEU1; RBM3; TPT1; MIF; CTSD; CTSC; HEXA; FASN; SLC44A1;
Placenta	176	10894	81.106	1.36223	6.9049e-12	5.85536e-09	7.31919e-10	2.88103e-09	ACSL5; ADPGK; APPL2; ARL6IP1; ATP2B4; ATRX; BICD2; CDK6; CHST11; CLEC1B; CLN5; CNOT10; EFR3A; F2RL3; FBXO7; FGFR1OP; GIMAP8; GLRX; GORASP2; GZMA; HDAC3; HEATR5B; HNRNPH3; IFNG; IL18; IL2; IPO11; KIAA1033; LIF; LRPAP1; LRRC47; LTA; M6PR; MMP8; NCKAP1; NUDCD1; NUP62; OSM; PFKFB3; PI4KA; PMVK; PNKP; POLE3; PRF1; PRPSAP1; RAB3D; RAC1; RANGRF; RECQL; RNMT; RPS6KA1; SEMA3F; SEMA4D; SHOC2; SIGLEC5; SLC2…
Monocyte	74	2842	34.1014	2.19566	8.66118e-12	7.34468e-09	8.16076e-10	3.2123e-09	ACSL5; ADPGK; APPL2; ARL6IP1; ATP2B4; CLN5; GLRX; GORASP2; GZMA; HNRNPH3; LRRC47; M6PR; MMP8; NCKAP1; PMVK; PRF1; PRPSAP1; RAB3D; RAC1; RECQL; TRMT1; TUBA1C; ZFP36L1; NUP85; ESYT2; ITIH4; JUP; NAAA; NOTCH2; GZMH; GFAP; C1QB; C1QA; SLC29A1; KRT18; PHGDH; CCL5; TIMP2; FAM129B; KRT5; BID; OXSR1; KRT1; ASNS; C4BPA; CTSS; PPP3R1; RALB; SLC1A5; GM2A; KRT8; PLBD2; CTSA; CFP; PSAT1; MCM4; KRT77; GNS; C3;…
CaOV3	81	3355	37.3272	2.03585	2.74623e-11	2.3288e-08	2.3288e-09	9.16681e-09	ADPGK; ARL6IP1; ATP2B4; CLN5; DOHH; GLRX; GORASP2; HNRNPH3; LRPAP1; LRRC47; M6PR; NCKAP1; NUP62; PMVK; PNKP; POLE3; PRPSAP1; RAB3D; RAC1; RNMT; RPS6KA1; SEMA3F; SEMA4D; SLC2A1; SP100; SRP72; TSG101; TUBA1C; CLUH; FKBP9; MSH2; POLR1C; RBM47; ESYT2; JUP; PPP1R14A; TCN2; GCDH; TGFBI; CST7; FOLR1; KRT18; PHGDH; TIMP2; FAM129B; KRT5; KRT79; SMARCC1; BID; OXSR1; KRT1; ASNS; RALB; SLC1A5; GM2A; KRT8; PL…
OVCAR3	86	3714	39.6313	1.95257	4.32185e-11	3.66493e-08	3.33176e-09	1.31147e-08	ADPGK; ARL6IP1; ATP2B4; BICD2; DOHH; EXOSC5; GLRX; GORASP2; HNRNPH3; IL18; LRPAP1; LRRC47; M6PR; NCKAP1; NUDCD1; NUP62; PAF1; PMVK; POLE3; PRPSAP1; RAB3D; RAC1; RECQL; RNMT; RPS6KA1; SEMA4D; SHOC2; SLC2A1; SP100; SRP72; TNPO2; TSG101; TUBA1C; CLUH; DCK; FKBP9; MSH2; NCBP2; POLR1C; RBM47; SDE2; ESYT2; ITIH4; JUP; NOTCH2; PPP1R14A; FOLR1; RRM1; KRT18; PHGDH; TIMP2; FAM129B; KRT5; SMARCC1; BID; OXSR…
Urine	78	3267	35.9447	2.01326	1.39733e-10	1.18493e-07	9.87445e-09	3.88685e-08	APPL2; CD27; CLEC1B; CLN5; FBXO7; GLRX; IL18; KIAA1033; MMP8; NCKAP1; PMVK; RAB3D; RAC1; SLC2A1; SMPD1; THOC2; TOP2A; TSG101; TUBA1C; URM1; CLUH; DCK; RBM47; IL2RA; ITIH4; JUP; NAAA; NOTCH2; TCN2; CAMSAP3; GCDH; GFAP; CST7; FOLR1; SMPDL3A; MRC1; KRT18; PHGDH; TIMP2; FAM129B; KRT5; KRT75; BID; OXSR1; KRT1; CFD; C4BPA; CTSS; RALB; GM2A; KRT8; PLBD2; CTSA; PSAT1; LRP1; KRT77; GNS; C3; CTSH; GLA; SCP…
global_SCX_fractionated	65	2476	29.9539	2.21375	2.02257e-10	1.71514e-07	1.31934e-08	5.19327e-08	ARL6IP1; ATP2B4; BICD2; DOHH; EXOSC5; FBXO7; GLRX; GORASP2; HNRNPH3; IL18; IPO11; KIAA1033; LRPAP1; LRRC47; M6PR; NCKAP1; NUDCD1; NUP62; PI4KA; PMVK; RAC1; RECQL; RPS6KA1; SLC2A1; SP100; SRP72; THOC2; TNPO2; TRMT1; TUBA1C; CLUH; NUP85; POLR1C; JUP; GCDH; RRM1; SLC29A1; KRT18; PHGDH; FAM129B; KRT5; SMARCC1; BID; OXSR1; KRT1; RALB; SLC1A5; GM2A; KRT8; CTSA; NPM3; PSAT1; MCM4; LRP1; GNS; TPP1; NUB1;…
Ascites cancer cell	81	3509	37.3272	1.9465	2.72787e-10	2.31323e-07	1.65231e-08	6.50394e-08	ADPGK; ATP2B4; CLN5; GLRX; GORASP2; HNRNPH3; LRPAP1; LRRC47; M6PR; MMP8; NUP62; PAF1; PNKP; RAB3D; RAC1; RECQL; RNMT; SLC2A1; SLC31A1; SP100; SRP72; TNPO2; TSG101; TUBA1C; ZFP36L1; CLUH; CXCL10; NUP85; POLR1C; RBM47; GZMB; CREM; ESYT2; ITIH4; JUP; NAAA; NOTCH2; GCDH; TGFBI; C1QB; C1QA; FOLR1; MRC1; KRT18; PHGDH; TIMP2; KRT5; SMARCC1; KRT1; STAB1; C4BPA; CTSS; SLC1A5; GM2A; RNASE6; GBP2; KRT8; CTS…
Endometrium	41	1202	18.894	2.87662	7.12127e-10	6.03884e-07	4.02589e-08	1.5847e-07	ATRX; CDK6; GLRX; HNRNPH3; LRPAP1; PRF1; RAC1; RPS6KA1; SLC2A1; TOP2A; TSG101; XRCC6; ZFP36L1; CXCL10; GZMB; CREM; ITIH4; JUP; SYTL4; TCN2; HDAC4; C1QA; IDO1; CSF3; KRT18; PHGDH; KRT5; BID; KRT1; C4BPA; CTSS; PPP3R1; KRT8; LRP1; C3; CTSH; GLA; MIF; CTSD; FASN; NAGA;
PC3	42	1294	19.3548	2.73726	1.88808e-09	1.60109e-06	9.65864e-08	3.8019e-07	CHST11; HNRNPH3; LIF; RAB3D; RAC1; SEMA3F; SMPD1; TNPO2; TUBA1C; JUP; NOTCH2; GFAP; SMPDL3A; SLC29A1; KRT18; PHGDH; TIMP2; KRT1; CFD; GM2A; B4GALT5; KRT8; PLBD2; CTSA; HSPA13; GNS; CTSH; GLA; SCPEP1; LIPA; ANG; TPP1; GGH; NEU1; RBM3; TPT1; MIF; CTSD; CD320; CTSC; FASN; NAGA;
Dendritic cells	54	1954	24.8848	2.33049	1.93628e-09	1.64197e-06	9.65864e-08	3.8019e-07	ADPGK; ATP2B4; BICD2; CLEC1B; GLRX; HNRNPH3; LRRC47; LTA; M6PR; PMVK; RAC1; RPS6KA1; SRP72; SUCLG1; URM1; XRCC6; CXCL10; DCK; ARHGAP18; CD300C; NAAA; PPP1R14A; TGFBI; C1QB; C1QA; CST7; MRC1; CCL5; TIMP2; FAM129B; BID; CFD; CTSS; GM2A; RNASE6; GBP2; PLBD2; CTSA; GNS; C3; IL1B; CTSH; SCPEP1; LIPA; TPP1; RBM3; TPT1; MIF; CTSD; CD320; CTSC; HEXA; FASN; NAGA;
031003_BALF2	38	1102	17.5115	2.90812	2.47655e-09	2.10011e-06	1.16673e-07	4.59256e-07	DOHH; GLRX; GORASP2; HNRNPH3; IL18; LRRC47; SRP72; TNFRSF18; TNPO2; RBM47; ITIH4; JUP; C1QB; C1QA; KRT18; PHGDH; FAM129B; SMARCC1; KRT1; GM2A; GBP2; KRT8; PLBD2; CTSA; PSAT1; MCM4; LRP1; GNS; C3; NEU1; TPT1; MIF; CTSD; CTSC; HEXA; FASN; NAGA; SRM;
YTS	52	1888	23.9631	2.32265	4.75619e-09	4.03325e-06	2.12276e-07	8.35578e-07	ACSL5; ADPGK; ARL6IP1; ATP2B4; CHST11; CNOT10; HEATR5B; M6PR; PI4KA; PMVK; PNKP; PPP1R16B; PRF1; RAC1; RECQL; SEMA4D; SLC2A1; SRP72; THOC2; XRCC6; CLUH; MSH2; NUP85; GZMB; ESYT2; NOTCH2; GZMH; CST7; CTSW; RRM1; SLC29A1; KRT5; KRT1; RALB; SLC1A5; CEP128; CTSA; MCM4; SLC7A1; SCPEP1; LIPA; TPP1; GGH; MIF; FYN; CD320; CTSC; HEXA; FASN; KRT10; NCAPG2; SLC44A1;
Nipple aspirate fluid	30	754	13.8249	3.35575	6.10856e-09	5.18006e-06	2.51581e-07	9.90291e-07	RAC1; TUBA1C; ITIH4; NOTCH2; TGFBI; C1QB; FOLR1; KRT18; TIMP2; KRT5; KRT75; KRT79; BID; KRT1; C4BPA; GM2A; KRT8; CTSA; CFP; C3; CTSH; SCPEP1; TPP1; GGH; TPT1; MIF; CTSD; HEXA; FASN; KRT10;
Plasma	180	11971	82.9493	1.26785	6.23019e-09	5.2832e-06	2.51581e-07	9.90291e-07	ACSL5; ADPGK; APPL2; ARL6IP1; ATP2B4; ATRX; BICD2; CD226; CD27; CLEC1B; CLN5; CNOT10; DOHH; EFR3A; EXOSC5; F2RL3; FAM45A; FBXO7; FGFR1OP; GLRX; GORASP2; HDAC3; HEATR5B; HNRNPH3; IFNG; IL18; IPO11; KIAA1033; LIF; LRPAP1; LRRC47; LTA; M6PR; MMP8; NCKAP1; NUDCD1; PAF1; PFKFB3; PI4KA; PMVK; PNKP; POLE3; PRF1; PRPSAP1; RAB3D; RAC1; RECQL; RNMT; RPS6KA1; SEMA3F; SEMA4D; SHOC2; SIGLEC5; SLC2A1; SMPD1; S…
Tonsils	128	7274	58.9862	1.48378	6.90986e-09	5.85956e-06	2.66344e-07	1.0484e-06	ATP2B4; ATRX; BICD2; CD226; CD27; CDK6; CLEC1B; EFR3A; GIMAP8; GLRX; GORASP2; IFNG; IL18; IL2; LIF; LRPAP1; LRRC47; LTA; MMP8; NCKAP1; NUDCD1; NUP62; OSM; PFKFB3; PI4KA; PMVK; PNKP; PRF1; RAB3D; RAC1; RECQL; RPS6KA1; SEMA3F; SEMA4D; SHOC2; SIGLEC5; SLC2A1; SLC31A1; SMPD1; SP100; SRP72; TNFRSF18; TNFRSF4; TOP2A; TSG101; XRCC6; ZFP36L1; FKBP9; LAT; MSH2; RBM47; SDE2; ICOS; IL2RA; LAG3; GZMB; CD300C…
MDA468	30	760	13.8249	3.32926	7.32035e-09	6.20765e-06	2.69898e-07	1.06239e-06	SEMA3F; SLC2A1; TUBA1C; XRCC6; TGFBI; KRT18; PHGDH; TIMP2; KRT5; BID; KRT1; CTSS; SLC1A5; GM2A; B4GALT5; KRT8; CTSA; PSAT1; HSPA13; GNS; CTSH; LIPA; TPP1; GGH; TPT1; MIF; CTSD; CTSC; FASN; KRT10;
HL60	25	545	11.5207	3.8691	7.88357e-09	6.68527e-06	2.78553e-07	1.09646e-06	ADPGK; ARL6IP1; ATP2B4; M6PR; SEMA4D; SIGLEC5; SLC2A1; IL2RA; CD300C; NOTCH2; SLC29A1; KRT75; KRT1; CTSS; SLC1A5; CFP; LRP1; C3; SLC7A1; MIF; CTSD; FASN; KRT10; MERTK; SLC44A1;
PC3(AR)6	17	262	7.8341	5.47377	1.60538e-08	1.36136e-05	5.44544e-07	2.14347e-06	SEMA3F; KRT18; TIMP2; KRT75; KRT1; CFD; GM2A; KRT8; CTSA; HSPA13; GNS; C3; TPP1; TPT1; CTSD; CTSC; KRT10;
K-562	61	2513	28.1106	2.04695	1.88662e-08	1.59985e-05	6.15327e-07	2.42209e-06	CDK6; FBXO7; FGFR1OP; GORASP2; HNRNPH3; IPO11; KIAA1033; LRRC47; NCKAP1; NUDCD1; NUP62; PAF1; PI4KA; POLE3; RECQL; RNMT; RPS6KA1; SRP72; SUCLG1; THOC2; TNPO2; TOP2A; TUBA1C; WDR4; ZNF706; CLUH; DCK; MSH2; NCBP2; NUP85; POLR1C; ESYT2; JUP; PPP1R14A; GCDH; LIMD1; SPEG; RRM1; KRT18; PHGDH; FAM129B; SMARCC1; BID; OXSR1; ASNS; RALB; KRT8; NPM3; PSAT1; MCM4; GNS; TPP1; TPT1; MIF; CTSD; FYN; CTSC; FASN;…
Neutrophil	53	2031	24.424	2.20063	2.06167e-08	1.7483e-05	6.47517e-07	2.5488e-06	ARL6IP1; ATP2B4; GLRX; HNRNPH3; LRRC47; M6PR; MMP8; PAF1; RAB3D; RAC1; SEMA4D; SIGLEC5; SLC2A1; SRP72; THOC2; TOP2A; TUBA1C; POLR1C; ITIH4; JUP; GCDH; TGFBI; GFAP; C1QB; C1QA; FOLR1; KRT18; PHGDH; FAM129B; KRT5; SMARCC1; BID; KRT1; OLFM1; C4BPA; CTSS; RALB; KRT8; PLBD2; CTSA; NPM3; CFP; PSAT1; LRP1; KRT77; C3; TPP1; TPT1; MIF; CTSD; CTSC; FASN; KRT10;
Platelets	55	2168	25.3456	2.13934	2.7231e-08	2.30919e-05	8.24712e-07	3.24629e-06	ACSL5; APPL2; ARL6IP1; ATRX; CD226; F2RL3; GORASP2; HEATR5B; M6PR; NCKAP1; PMVK; POLE3; RAC1; SEMA4D; SRP72; SUCLG1; TUBA1C; LAT; ARHGAP18; ESYT2; ITIH4; JUP; PPP1R14A; SYTL4; CD69; GFAP; C1QB; CCL5; TIMP2; KRT5; KRT75; BID; OXSR1; KRT1; C4BPA; PPP3R1; RALB; CTSA; HPSE; KRT77; GNS; VPS13A; C3; TPP1; GGH; TPT1; MIF; FYN; CTSC; FASN; GUCY1B3; THBS3; KRT10; MERTK; PIK3AP1;
CPE_SCX_fractionated	57	2331	26.2673	2.06209	5.10488e-08	4.32894e-05	1.49274e-06	5.87582e-06	ARL6IP1; ATP2B4; BICD2; DOHH; EXOSC5; GLRX; GORASP2; HEATR5B; IL18; KIAA1033; LRRC47; NCKAP1; NUDCD1; NUP62; PI4KA; PMVK; RAB3D; RECQL; RNMT; RPS6KA1; SHOC2; SRP72; THOC2; TNPO2; TRMT1; TUBA1C; WDR4; CLUH; MSH2; ESYT2; JUP; RRM1; PHGDH; FAM129B; KRT5; BID; OXSR1; KRT1; PPP3R1; SLC1A5; GM2A; PLBD2; CTSA; NPM3; PSAT1; MCM4; LRP1; NUB1; TPT1; MIF; CTSD; CTSC; FASN; KRT10; NDRG3; SRM; SLC44A1;
HEK293	88	4439	40.553	1.67165	7.24087e-08	6.14026e-05	2.04675e-06	8.05657e-06	ADPGK; APPL2; ATP2B4; ATRX; BICD2; CLN5; CNOT10; DOHH; FBXO7; FGFR1OP; GLRX; GORASP2; HDAC3; HNRNPH3; IPO11; KIAA1033; LRPAP1; LRRC47; M6PR; NCKAP1; NUDCD1; NUP62; PAF1; PI4KA; PMVK; PRPSAP1; RAC1; RANGRF; RECQL; RNMT; RPS6KA1; SLC2A1; SRP72; THOC2; TNPO2; TOP2A; TRMT1; TSG101; TUBA1C; WBSCR22; CLUH; DCK; MSH2; NUP85; POLR1C; SDE2; ESYT2; JUP; GCDH; RRM1; SLC29A1; KRT18; PHGDH; FAM129B; KRT5; SMA…
TOV21G	31	904	14.2857	2.8922	1.00604e-07	8.53121e-05	2.752e-06	1.08326e-05	HNRNPH3; LRRC47; TUBA1C; XRCC6; TGFBI; PHGDH; TIMP2; KRT1; LIPG; SLC1A5; GM2A; KRT8; CTSA; PSAT1; MCM4; HSPA13; GNS; C3; CTSH; GLA; LIPA; ANG; GGH; NEU1; RBM3; TPT1; MIF; CTSD; CTSC; HEXA; MERTK;
Lung	156	9992	71.8894	1.31644	1.11037e-07	9.41595e-05	2.94248e-06	1.15824e-05	ACSL5; ATP2B4; ATRX; BICD2; CD226; CDK6; CHST11; CLEC1B; CLN5; EFR3A; F2RL3; FBXO7; GIMAP8; GLRX; GORASP2; HDAC3; HEATR5B; HNRNPH3; IFNG; IL18; IL2; IPO11; KIAA1033; LIF; LRPAP1; LRRC47; LTA; MMP8; NCKAP1; NUDCD1; NUP62; OSM; PFKFB3; PI4KA; PMVK; PNKP; POLE3; RAB3D; RAC1; RANGRF; RECQL; RNMT; RPS6KA1; SEMA3F; SEMA4D; SHOC2; SIGLEC5; SLC2A1; SLC31A1; SMPD1; SP100; SRP72; TNFRSF18; TNFRSF4; TOP2A; …
Pancreas	155	9936	71.4286	1.31537	1.49127e-07	0.00012646	3.83212e-06	1.50843e-05	ACSL5; ATP2B4; ATRX; BICD2; CDK6; CHST11; CLEC1B; CLN5; EFR3A; F2RL3; FBXO7; FGFR1OP; GIMAP8; GLRX; GORASP2; HDAC3; HEATR5B; HNRNPH3; IL18; IL2; IPO11; KIAA1033; LIF; LRPAP1; LRRC47; LTA; MMP8; NCKAP1; NUDCD1; NUP62; OSM; PFKFB3; PI4KA; PMVK; PNKP; POLE3; PPP1R16B; RAB3D; RAC1; RANGRF; RECQL; RNMT; RPS6KA1; SEMA3F; SEMA4D; SHOC2; SIGLEC5; SLC2A1; SLC31A1; SMPD1; SP100; SRP72; THOC2; TNFRSF18; TOP…
H460	27	736	12.4424	3.09415	1.94835e-07	0.00016522	4.8594e-06	1.91279e-05	GLRX; SLC2A1; XRCC6; TGFBI; TIMP2; FAM129B; OLFM1; CFD; LIPG; GM2A; PSAT1; HSPA13; GNS; ST8SIA4; GLA; SCPEP1; LIPA; ANG; GGH; RBM3; TPT1; MIF; CTSD; CTSC; HEXA; THBS3; SLC44A1;
Bone marrow	130	7808	59.9078	1.4039	2.08976e-07	0.000177211	5.06318e-06	1.99301e-05	ADPGK; ATP2B4; ATRX; BICD2; CD27; CDK6; CHST11; CLEC1B; DOHH; EFR3A; F2RL3; FGFR1OP; GIMAP8; GLRX; GORASP2; HDAC3; IL18; IL2; KIAA1033; LIF; LRPAP1; LRRC47; M6PR; MMP8; NCKAP1; NUDCD1; NUP62; OSM; PFKFB3; PI4KA; PMVK; PNKP; PRPSAP1; RAB3D; RAC1; RECQL; RPS6KA1; SEMA4D; SHOC2; SIGLEC5; SLC2A1; SLC31A1; SMPD1; SP100; SRP72; SUCLG1; TOP2A; TRMT1; TSG101; WDR4; XRCC6; CXCL10; FKBP9; LAT; MSH2; POLR1C…
MicroProt2	23	561	10.5991	3.45817	2.45747e-07	0.000208394	5.78871e-06	2.27859e-05	CD27; GLRX; TUBA1C; NOTCH2; GFAP; FOLR1; TIMP2; KRT5; KRT79; SMARCC1; KRT1; CTSS; GM2A; RNASE6; CFP; KRT77; CTSH; ANG; GGH; MIF; CTSD; FASN; KRT10;
Lymph nodes	116	6700	53.4562	1.45989	2.77101e-07	0.000234982	6.35086e-06	2.49987e-05	ATP2B4; ATRX; BICD2; CD226; CD27; CDK6; CHST11; CLEC1B; EFR3A; F2RL3; FGFR1OP; GIMAP8; GLRX; GORASP2; HDAC3; IL18; IL2; LIF; LRPAP1; LRRC47; LTA; NCKAP1; NUDCD1; NUP62; OSM; PFKFB3; PI4KA; PMVK; PNKP; PRF1; RAB3D; RAC1; RECQL; RPS6KA1; SEMA4D; SHOC2; SIGLEC5; SLC31A1; SMPD1; SP100; SRP72; TNFRSF18; TNFRSF4; TOP2A; TSG101; XRCC6; ZFP36L1; FKBP9; LAT; MSH2; SDE2; ICOS; LAG3; GZMB; CD300C; CREM; ESY…
hupo1_b2-hep_cam	29	848	13.3641	2.88434	2.88125e-07	0.00024433	6.42974e-06	2.53092e-05	ADPGK; ATP2B4; CHST11; KIAA1033; M6PR; NUP62; RAC1; SEMA4D; SLC2A1; TUBA1C; LAT; NUP85; ESYT2; JUP; SLC29A1; PHGDH; BID; KRT1; C4BPA; RALB; SLC1A5; KRT77; SLC7A1; TPP1; FYN; FASN; KRT10; NDRG3; SLC44A1;
MicroProt	20	440	9.21659	3.83429	3.12228e-07	0.000264769	6.78896e-06	2.67232e-05	CNOT10; TUBA1C; NOTCH2; GFAP; C1QB; TIMP2; KRT5; KRT1; C4BPA; CTSS; GM2A; RNASE6; CFP; KRT77; C3; CTSH; ANG; GGH; CTSD; KRT10;
Renal cancer	121	7121	55.7604	1.43278	3.28125e-07	0.00027825	6.95625e-06	2.73817e-05	ATP2B4; ATRX; BICD2; CDK6; CLEC1B; EFR3A; GIMAP8; GLRX; GORASP2; HDAC3; IFNG; IL18; IL2; LIF; LRPAP1; LRRC47; LTA; MMP8; NCKAP1; NUDCD1; NUP62; OSM; PFKFB3; PI4KA; PMVK; PNKP; RAB3D; RAC1; RECQL; RPS6KA1; SEMA3F; SEMA4D; SHOC2; SIGLEC5; SLC2A1; SLC31A1; SMPD1; SP100; SRP72; TNFRSF18; TOP2A; TSG101; WDR4; XRCC6; ZFP36L1; FKBP9; MSH2; RBM47; SDE2; GZMB; CD300C; ESYT2; ITIH4; JUP; NAAA; PPP1R14A; SY…
Cerebrospinal fluid	33	1059	15.2074	2.62812	3.3977e-07	0.000288125	7.02743e-06	2.76619e-05	NUDCD1; SIGLEC5; TUBA1C; CXCL10; ITIH4; JUP; TCN2; TGFBI; GFAP; C1QB; C1QA; MRC1; KRT18; TIMP2; KRT5; KRT1; CFD; CTSS; GM2A; RNASE6; KRT8; PSAT1; LRP1; KRT77; C3; CTSH; ANG; TPP1; GGH; MIF; CTSD; HEXA; KRT10;
TOV112D	37	1276	17.0507	2.44549	3.56852e-07	0.000302611	7.20502e-06	2.83609e-05	DOHH; GLRX; GORASP2; HNRNPH3; LRRC47; TUBA1C; XRCC6; TGFBI; KRT18; PHGDH; TIMP2; FAM129B; KRT1; ASNS; CFD; LIPG; GM2A; KRT8; NPM3; PSAT1; MCM4; GNS; C3; CTSH; GLA; ANG; TPP1; GGH; RBM3; TPT1; MIF; CTSD; CTSC; HEXA; FASN; THBS3; MERTK;
Bladder cancer cells	18	369	8.29493	4.11506	4.50612e-07	0.000382119	8.88649e-06	3.49796e-05	ATP2B4; RAC1; SLC2A1; TSG101; TUBA1C; XRCC6; JUP; KRT18; PHGDH; FAM129B; KRT5; KRT1; SLC1A5; KRT8; TPP1; MIF; CTSD; FASN;
Seminal vesicle	114	6620	52.5346	1.45206	5.58042e-07	0.000473219	1.0755e-05	4.23345e-05	ATP2B4; ATRX; BICD2; CD226; CDK6; CLEC1B; EFR3A; GIMAP8; GLRX; GORASP2; HDAC3; IFNG; IL18; IL2; LIF; LRPAP1; LRRC47; LTA; NCKAP1; NUDCD1; NUP62; OSM; PFKFB3; PI4KA; PMVK; PNKP; RAB3D; RAC1; RECQL; RPS6KA1; SEMA4D; SHOC2; SIGLEC5; SMPD1; SP100; SRP72; TOP2A; TSG101; WDR4; XRCC6; ZFP36L1; FKBP9; LAT; MSH2; POLR1C; RBM47; SDE2; CREM; ESYT2; ITIH4; JUP; NAAA; SYTL4; TCN2; LDLRAD2; SPEG; HDAC4; C1QA; …
Melanoma	46	1826	21.1982	2.12446	6.24526e-07	0.000529598	1.17688e-05	4.63254e-05	GLRX; HNRNPH3; IL18; KIAA1033; NUP62; PMVK; RAC1; RECQL; RNMT; XRCC6; RBM47; ARHGAP18; ESYT2; ITIH4; JUP; TGFBI; C1QB; RRM1; PHGDH; FAM129B; KRT5; BID; OXSR1; KRT1; STAB1; GM2A; PLBD2; CTSA; PSAT1; LRP1; GNS; C3; CTSH; SCPEP1; LIPA; TPP1; GGH; RBM3; TPT1; CTSD; IQCE; CTSC; HEXA; FASN; KRT10; SRM;
Endometrial cancer	124	7460	57.1429	1.40158	7.34738e-07	0.000623058	1.35447e-05	5.33158e-05	ATP2B4; ATRX; BICD2; CD226; CDK6; CLEC1B; EFR3A; GIMAP8; GLRX; GORASP2; HDAC3; IFNG; IL18; IL2; LIF; LRPAP1; LRRC47; LTA; MMP8; NCKAP1; NUDCD1; NUP62; OSM; PFKFB3; PI4KA; PMVK; PNKP; RAB3D; RAC1; RECQL; RPS6KA1; SEMA3F; SEMA4D; SHOC2; SIGLEC5; SLC2A1; SLC31A1; SMPD1; SP100; SRP72; TNFRSF18; TOP2A; TSG101; WDR4; XRCC6; ZFP36L1; FKBP9; LAT; MSH2; POLR1C; RBM47; SDE2; CREM; ESYT2; ITIH4; JUP; NAAA; …
Preadipocytes	21	510	9.67742	3.47334	7.87133e-07	0.000667488	1.42019e-05	5.59025e-05	IFNG; LIF; OSM; TNFRSF18; TUBA1C; FKBP9; ITIH4; TGFBI; CCL5; TIMP2; KRT5; KRT1; CFD; PLBD2; PSAT1; LRP1; GNS; C3; IL1B; CTSD; FASN;
Monocytes	26	745	11.9816	2.9436	8.60337e-07	0.000729565	1.51993e-05	5.98285e-05	CLEC1B; F2RL3; FGFR1OP; LTA; M6PR; RAB3D; RAC1; CXCL10; DCK; CD300C; CD69; C1QA; CSF3; XCL2; BID; KRT1; STAB1; CFD; LIPG; RNASE6; CFP; C3; MIF; CTSC; KRT10; SLC44A1;
H23	29	896	13.3641	2.72983	8.89732e-07	0.000754493	1.53978e-05	6.061e-05	CHST11; DOHH; GORASP2; HNRNPH3; RECQL; TOP2A; XRCC6; NOTCH2; TIMP2; SMARCC1; OLFM1; GM2A; KRT8; PLBD2; CTSA; HSPA13; GNS; GLA; LIPA; ANG; TPP1; GGH; TPT1; MIF; CTSD; CTSC; HEXA; FASN; THBS3;
Jurkat	62	2869	28.5714	1.82234	9.5146e-07	0.000806838	1.61368e-05	6.35187e-05	ATP2B4; BICD2; CDK6; DOHH; FGFR1OP; GLRX; HDAC3; HNRNPH3; IPO11; LRPAP1; LRRC47; M6PR; MMP8; NUDCD1; PAF1; PI4KA; PPP1R16B; RAB3D; RPS6KA1; SEMA4D; SLC2A1; SMPD1; SRP72; SUCLG1; THOC2; TNPO2; XRCC6; ZNF706; CLUH; DCK; NCBP2; NUP85; POLR1C; ESYT2; JUP; GCDH; HDAC4; CD69; RRM1; SLC29A1; KRT18; PHGDH; BID; SLC1A5; CTSA; NPM3; PSAT1; MCM4; VPS13A; SLC7A1; SCPEP1; TPP1; RBM3; TPT1; MIF; CTSD; FYN; FAS…
Cervical cancer	123	7426	56.682	1.39664	1.09445e-06	0.000928096	1.8198e-05	7.16321e-05	ATP2B4; ATRX; BICD2; CD226; CDK6; CLEC1B; EFR3A; GIMAP8; GLRX; GORASP2; HDAC3; IFNG; IL18; IL2; LIF; LRPAP1; LRRC47; LTA; MMP8; NCKAP1; NUDCD1; NUP62; OSM; PFKFB3; PMVK; PNKP; PRF1; RAB3D; RAC1; RECQL; RPS6KA1; SEMA3F; SEMA4D; SHOC2; SIGLEC5; SLC2A1; SLC31A1; SMPD1; SP100; SRP72; TNFRSF18; TOP2A; TSG101; WDR4; XRCC6; ZFP36L1; FKBP9; LAT; MSH2; POLR1C; RBM47; SDE2; CD300C; CREM; ESYT2; ITIH4; JUP;…
B Cell	52	2254	23.9631	1.9455	1.44175e-06	0.0012226	2.34045e-05	9.21265e-05	ADPGK; CD27; DOHH; FGFR1OP; GLRX; GZMA; HNRNPH3; LRRC47; M6PR; MMP8; NUP62; PRF1; RAB3D; RAC1; RECQL; SLC2A1; SUCLG1; TRMT1; TUBA1C; XRCC6; ZNF706; CLUH; DCK; IL2RA; JUP; GCDH; GFAP; RRM1; CSF3; KRT18; PHGDH; KRT5; OXSR1; KRT1; C4BPA; CTSS; GM2A; KRT8; PLBD2; CTSA; PSAT1; MCM4; KRT77; TPP1; RBM3; TPT1; MIF; CTSD; CTSC; FASN; KRT10; SRM;
Adipocytes	11	147	5.06912	6.31453	1.46278e-06	0.00124044	2.34045e-05	9.21265e-05	IFNG; LIF; OSM; RPS6KA1; SLC2A1; TNFRSF18; CFD; C3; IL1B; MIF; FASN;
Spleen	128	7887	58.9862	1.36846	1.61562e-06	0.00137004	2.53712e-05	9.98678e-05	ACSL5; ATP2B4; ATRX; BICD2; CD226; CD27; CDK6; CHST11; CLEC1B; EFR3A; F2RL3; FGFR1OP; GIMAP8; GLRX; GORASP2; HDAC3; HNRNPH3; IL18; KIAA1033; LIF; LRPAP1; LRRC47; MMP8; NCKAP1; NUDCD1; NUP62; OSM; PFKFB3; PI4KA; PMVK; PNKP; PPP1R16B; PRF1; RAB3D; RAC1; RECQL; RPS6KA1; SEMA4D; SHOC2; SIGLEC5; SLC31A1; SP100; SRP72; TNFRSF18; TNFRSF4; TOP2A; TSG101; WBSCR22; WDR4; XRCC6; CXCL10; DCK; DXO; FKBP9; LAT…
Ovary	136	8592	62.6728	1.33468	2.05878e-06	0.00174585	3.17427e-05	0.000124948	ACSL5; ARL6IP1; ATP2B4; ATRX; BICD2; CDK6; CHST11; EFR3A; FGFR1OP; GIMAP8; GLRX; GORASP2; HDAC3; HEATR5B; HNRNPH3; IL18; IL2; IPO11; KIAA1033; LIF; LRPAP1; LRRC47; LTA; M6PR; MMP8; NCKAP1; NUDCD1; NUP62; OSM; PFKFB3; PI4KA; PMVK; PNKP; RAB3D; RAC1; RECQL; RPS6KA1; SEMA4D; SHOC2; SLC2A1; SLC31A1; SMPD1; SP100; SRP72; SUCLG1; THOC2; TNPO2; TSG101; TUBA1C; XRCC6; CLUH; DXO; FKBP9; MSH2; POLR1C; SDE2…
T cells	43	1726	19.8157	2.101	2.11678e-06	0.00179503	3.20541e-05	0.000126174	ATRX; CD27; CDK6; EXOSC5; GIMAP8; HNRNPH3; IFNG; KIAA1033; LRRC47; NUP62; PAF1; PNKP; PRF1; RECQL; SRP72; THOC2; TNFRSF18; TNFRSF4; XRCC6; DCK; MSH2; POLR1C; ICOS; IL2RA; LAG3; CREM; ESYT2; GZMH; CST7; PHGDH; CCL5; SMARCC1; BID; KRT1; SLC1A5; GBP2; CFP; C3; RBM3; TPT1; MIF; FYN; KRT10;
Jurkat A3	80	4200	36.8664	1.60618	2.3479e-06	0.00199102	3.45938e-05	0.000136171	ADPGK; ATRX; CDK6; CHST11; CLN5; CNOT10; DOHH; FBXO7; FGFR1OP; GZMA; HEATR5B; KIAA1033; LRPAP1; LRRC47; M6PR; NUDCD1; PAF1; PMVK; PNKP; PRPSAP1; RANGRF; RNMT; SLC2A1; SP100; SUCLG1; TRMT1; URM1; XRCC6; CLUH; DCK; LAT; MSH2; NUP85; SDE2; ESYT2; JUP; CAMSAP3; GCDH; SPEG; GFAP; C1QA; RRM1; PHGDH; TIMP2; KRT5; SMARCC1; BID; OXSR1; ASNS; RALB; SLC1A5; GM2A; CEP128; KRT8; PLBD2; NPM3; PSAT1; MCM4; HPSE…
DU145	29	941	13.3641	2.59928	2.36608e-06	0.00200644	3.45938e-05	0.000136171	ATP2B4; EFR3A; LRRC47; M6PR; RAB3D; RAC1; RECQL; SLC2A1; TUBA1C; JUP; TGFBI; SLC29A1; PHGDH; TIMP2; FAM129B; ASNS; RALB; SLC1A5; PLBD2; CTSA; LRP1; GNS; SLC7A1; GGH; MIF; CTSD; HEXA; FASN; SLC44A1;
Uterine cervix	28	902	12.9032	2.6182	3.1318e-06	0.00265576	4.50129e-05	0.000177183	ATRX; CDK6; RPS6KA1; SLC2A1; TOP2A; TSG101; XRCC6; ZFP36L1; CREM; JUP; SYTL4; TCN2; HDAC4; KRT18; PHGDH; KRT5; BID; KRT1; CTSS; PPP3R1; KRT8; C3; CTSH; GLA; MIF; CTSD; KRT10; NAGA;
Pancreatic cancer	132	8316	60.8295	1.33842	3.36392e-06	0.00285261	4.75435e-05	0.000187144	ADPGK; ARL6IP1; ATP2B4; ATRX; BICD2; CD226; CDK6; CLEC1B; EFR3A; GIMAP8; GLRX; GORASP2; HDAC3; HNRNPH3; IFNG; IL18; IL2; LIF; LRPAP1; LRRC47; LTA; M6PR; MMP8; NCKAP1; NUDCD1; NUP62; OSM; PFKFB3; PI4KA; PMVK; PNKP; RAB3D; RAC1; RECQL; RPS6KA1; SEMA3F; SEMA4D; SHOC2; SIGLEC5; SLC2A1; SLC31A1; SMPD1; SP100; SRP72; TNFRSF18; TOP2A; TSG101; TUBA1C; WDR4; XRCC6; ZFP36L1; FKBP9; LAT; MSH2; NUP85; POLR1C…
Colorectal cancer cells	21	561	9.67742	3.15759	3.5579e-06	0.0030171	4.94607e-05	0.000194691	RAC1; SLC2A1; TSG101; TUBA1C; JUP; SLC29A1; KRT18; FAM129B; KRT5; KRT75; KRT79; KRT1; ASNS; RALB; SLC1A5; KRT8; KRT77; MIF; FASN; KRT10; SLC44A1;
HCT116	57	2651	26.2673	1.81318	3.6466e-06	0.00309231	4.9876e-05	0.000196326	DOHH; EXOSC5; GIMAP8; HNRNPH3; IL18; IPO11; LRRC47; NUDCD1; NUP62; PI4KA; PMVK; POLE3; PRPSAP1; RAB3D; RAC1; RECQL; SLC2A1; SP100; SRP72; SUCLG1; THOC2; TNPO2; TOP2A; TUBA1C; XRCC6; CLUH; DCK; MSH2; NCBP2; NUP85; POLR1C; ARHGAP18; ESYT2; JUP; GFAP; RRM1; KRT18; PHGDH; FAM129B; KRT79; SMARCC1; OXSR1; ASNS; RALB; SLC1A5; KRT8; NPM3; PSAT1; MCM4; TPP1; RBM3; TPT1; MIF; CTSD; FYN; FASN; SRM;
NB4	24	711	11.0599	2.84719	4.14776e-06	0.0035173	5.58301e-05	0.000219762	ADPGK; ARL6IP1; CHST11; M6PR; SEMA4D; SIGLEC5; SLC2A1; SUCLG1; TNFRSF4; SLC29A1; CCL5; STAB1; SLC1A5; CTSA; LRP1; CTSH; SLC7A1; MIF; CTSD; CD320; CTSC; FASN; MERTK; SLC44A1;
Colorectal cancer	122	7513	56.2212	1.36925	4.23416e-06	0.00359057	5.61026e-05	0.000220835	ATP2B4; ATRX; BICD2; CD226; CDK6; CLEC1B; EFR3A; GIMAP8; GLRX; GORASP2; HDAC3; IFNG; IL18; IL2; LIF; LRPAP1; LRRC47; LTA; MMP8; NCKAP1; NUDCD1; NUP62; OSM; PFKFB3; PI4KA; PMVK; PNKP; RAB3D; RAC1; RECQL; RPS6KA1; SEMA3F; SEMA4D; SHOC2; SLC2A1; SLC31A1; SMPD1; SP100; SRP72; TNFRSF18; TOP2A; TSG101; WDR4; XRCC6; ZFP36L1; FKBP9; LAT; MSH2; POLR1C; RBM47; SDE2; IL2RA; CREM; ESYT2; ITIH4; JUP; NAAA; PP…
Serum	124	7685	57.1429	1.36054	4.47696e-06	0.00379647	5.84072e-05	0.000229906	ATRX; BICD2; CDK6; CNOT10; DOHH; FBXO7; FGFR1OP; GIMAP8; HDAC3; IFNG; IPO11; KIAA1033; LRRC47; M6PR; MMP8; NCKAP1; NUDCD1; NUP62; OSM; PAF1; PFKFB3; PI4KA; PNKP; POLE3; PPP1R16B; RAC1; RANGRF; RECQL; RNMT; RPS6KA1; SEMA4D; SHOC2; SLC2A1; SP100; SRP72; SRSF12; SUCLG1; THOC2; TOP2A; TRMT1; TSG101; TUBA1C; WBSCR22; WDR4; CCDC9; CLUH; CXCL10; DCK; LAT; MSH2; NUP85; POLR1C; PPP2R5B; SDE2; GZMB; ARHGAP…
Urothelial cancer	121	7521	55.7604	1.35658	8.43437e-06	0.00715235	0.000108369	0.000426569	ATP2B4; ATRX; BICD2; CD226; CDK6; CLEC1B; EFR3A; GIMAP8; GLRX; GORASP2; HDAC3; IL18; IL2; LIF; LRPAP1; LRRC47; LTA; MMP8; NCKAP1; NUDCD1; NUP62; OSM; PFKFB3; PI4KA; PMVK; PNKP; RAB3D; RAC1; RECQL; RPS6KA1; SEMA3F; SEMA4D; SHOC2; SIGLEC5; SLC2A1; SLC31A1; SMPD1; SP100; SRP72; TNFRSF18; TOP2A; TSG101; XRCC6; ZFP36L1; FKBP9; LAT; MSH2; POLR1C; RBM47; SDE2; CREM; ESYT2; ITIH4; JUP; NAAA; PPP1R14A; SY…
Liver cancer	123	7697	56.682	1.34747	9.17188e-06	0.00777775	0.000116086	0.000456945	ATP2B4; ATRX; BICD2; CDK6; CLEC1B; EFR3A; GIMAP8; GLRX; GORASP2; HDAC3; IFNG; IL18; IL2; LIF; LRPAP1; LRRC47; LTA; MMP8; NCKAP1; NUDCD1; NUP62; OSM; PFKFB3; PI4KA; PMVK; PNKP; RAB3D; RAC1; RECQL; RPS6KA1; SEMA3F; SEMA4D; SIGLEC5; SLC2A1; SLC31A1; SMPD1; SP100; SRP72; TNFRSF18; TOP2A; TSG101; WDR4; XRCC6; ZFP36L1; FKBP9; LAT; MSH2; RBM47; SDE2; CD300C; CREM; ESYT2; ITIH4; JUP; NAAA; PPP1R14A; SYTL…
Skin	118	7292	54.3779	1.36449	9.55569e-06	0.00810322	0.000119165	0.000469066	ATP2B4; ATRX; BICD2; CDK6; CLEC1B; EFR3A; GIMAP8; GLRX; GORASP2; HEATR5B; HNRNPH3; IL18; IL2; LIF; LRPAP1; LRRC47; MMP8; NCKAP1; NUP62; OSM; PI4KA; PMVK; PNKP; RAB3D; RAC1; RECQL; RPS6KA1; SEMA3F; SEMA4D; SHOC2; SIGLEC5; SLC2A1; SMPD1; SP100; SRP72; TNFRSF18; TNFRSF4; TOP2A; TSG101; WDR4; XRCC6; ZFP36L1; FKBP9; MSH2; POLR1C; SDE2; IL2RA; CD300C; CREM; ESYT2; ITIH4; JUP; PPP1R14A; SYTL4; TCN2; LDL…
Malignant lymphoma	109	6586	50.2304	1.39555	1.10885e-05	0.00940303	0.000136276	0.000536419	ATP2B4; ATRX; BICD2; CD226; CD27; CDK6; CLEC1B; EFR3A; GIMAP8; GLRX; GORASP2; HDAC3; IL18; IL2; LIF; LRPAP1; LRRC47; LTA; NCKAP1; NUDCD1; NUP62; OSM; PFKFB3; PI4KA; PMVK; PNKP; PRF1; RAC1; RECQL; RPS6KA1; SEMA4D; SHOC2; SIGLEC5; SLC2A1; SMPD1; SP100; SRP72; TNFRSF18; TNFRSF4; TOP2A; TSG101; XRCC6; ZFP36L1; FKBP9; LAT; MSH2; RBM47; SDE2; IL2RA; LAG3; GZMB; CD300C; CREM; ESYT2; ITIH4; NAAA; SPEG; H…
Ovarian cancer	122	7644	56.2212	1.34578	1.14211e-05	0.00968509	0.000137928	0.000542921	ATP2B4; ATRX; BICD2; CD226; CDK6; CLEC1B; EFR3A; GIMAP8; GLRX; GORASP2; HDAC3; IFNG; IL18; IL2; LIF; LRPAP1; LRRC47; LTA; MMP8; NCKAP1; NUDCD1; NUP62; OSM; PFKFB3; PI4KA; PMVK; PNKP; RAB3D; RAC1; RECQL; RPS6KA1; SEMA3F; SEMA4D; SHOC2; SIGLEC5; SLC2A1; SMPD1; SP100; SRP72; TNFRSF18; TOP2A; TSG101; WDR4; XRCC6; ZFP36L1; FKBP9; LAT; MSH2; RBM47; SDE2; CD300C; CREM; ESYT2; ITIH4; JUP; NAAA; PPP1R14A;…
Stomach cancer	119	7399	54.8387	1.35616	1.15482e-05	0.00979287	0.000137928	0.000542921	ATP2B4; ATRX; BICD2; CD226; CDK6; CLEC1B; EFR3A; GIMAP8; GLRX; GORASP2; HDAC3; IFNG; IL18; IL2; LIF; LRPAP1; LRRC47; LTA; MMP8; NCKAP1; NUDCD1; NUP62; OSM; PFKFB3; PMVK; PNKP; RAB3D; RAC1; RECQL; RPS6KA1; SEMA3F; SEMA4D; SHOC2; SIGLEC5; SLC2A1; SLC31A1; SMPD1; SP100; SRP72; TNFRSF18; TOP2A; TSG101; XRCC6; ZFP36L1; FKBP9; LAT; MSH2; POLR1C; RBM47; SDE2; CREM; ESYT2; ITIH4; JUP; NAAA; PPP1R14A; SYT…
Lymphocytes	18	468	8.29493	3.24458	1.26613e-05	0.0107368	0.000149122	0.000586983	GZMA; IFNG; LTA; PRF1; RAC1; RECQL; SEMA4D; SP100; TOP2A; XRCC6; MSH2; ICOS; CD300C; GZMH; CD69; RRM1; CTSC; SRM;
Kidney	152	10256	70.0461	1.24967	1.45253e-05	0.0123174	0.00016785	0.000660703	ACSL5; APPL2; ATP2B4; ATRX; BICD2; CDK6; CHST11; CLEC1B; CLN5; EFR3A; FBXO7; FGFR1OP; GIMAP8; GLRX; GORASP2; HDAC3; HEATR5B; HNRNPH3; IFNG; IL18; IL2; IPO11; KIAA1033; LIF; LRPAP1; LRRC47; LTA; MMP8; NCKAP1; NUDCD1; NUP62; OSM; PFKFB3; PI4KA; PMVK; PNKP; POLE3; PPP1R16B; RAB3D; RAC1; RANGRF; RECQL; RNMT; RPS6KA1; SEMA3F; SEMA4D; SHOC2; SIGLEC5; SLC2A1; SLC31A1; SMPD1; SP100; SRP72; TNFRSF18; TOP2…
Nuclear	34	1319	15.6682	2.174	1.46473e-05	0.0124209	0.00016785	0.000660703	ARL6IP1; ATRX; CNOT10; EXOSC5; HEATR5B; HNRNPH3; LRRC47; NUP62; RECQL; SHOC2; SRP72; THOC2; TNPO2; TUBA1C; CLUH; RBM47; JUP; CAMSAP3; PHGDH; FAM129B; OXSR1; PPP3R1; PLBD2; NPM3; PSAT1; MCM4; GNS; CTSH; LIPA; TPP1; TPT1; MIF; CTSD; FASN;
Prostate cancer	116	7214	53.4562	1.35587	1.79566e-05	0.0152272	0.000203029	0.000799177	ATP2B4; ATRX; BICD2; CD226; CDK6; CLEC1B; EFR3A; GIMAP8; GLRX; GORASP2; HDAC3; IFNG; IL18; IL2; LIF; LRPAP1; LRRC47; LTA; MMP8; NCKAP1; NUDCD1; NUP62; OSM; PFKFB3; PI4KA; PMVK; PNKP; RAB3D; RAC1; RECQL; RPS6KA1; SEMA4D; SHOC2; SIGLEC5; SLC2A1; SLC31A1; SMPD1; SP100; SRP72; TNFRSF18; TOP2A; TSG101; WDR4; XRCC6; ZFP36L1; FKBP9; LAT; MSH2; RBM47; SDE2; CREM; ESYT2; ITIH4; JUP; NAAA; PPP1R14A; SYTL4;…
HTB75	33	1277	15.2074	2.17947	1.89248e-05	0.0160482	0.000208531	0.000820835	GLRX; GORASP2; HNRNPH3; LRPAP1; LRRC47; M6PR; TUBA1C; XRCC6; TGFBI; FOLR1; KRT18; PHGDH; TIMP2; SMARCC1; BID; KRT1; GM2A; KRT8; CTSA; MCM4; GNS; C3; GLA; TPP1; GGH; RBM3; TPT1; MIF; CTSD; CTSC; HEXA; FASN; KRT10;
Breast cancer	119	7467	54.8387	1.34381	1.90215e-05	0.0161302	0.000208531	0.000820835	ATP2B4; ATRX; BICD2; CD226; CDK6; CLEC1B; EFR3A; GIMAP8; GLRX; GORASP2; HDAC3; IFNG; IL18; IL2; LIF; LRPAP1; LRRC47; LTA; MMP8; NCKAP1; NUDCD1; NUP62; OSM; PFKFB3; PI4KA; PMVK; PNKP; RAB3D; RAC1; RECQL; RPS6KA1; SEMA3F; SEMA4D; SHOC2; SIGLEC5; SLC2A1; SLC31A1; SMPD1; SP100; SRP72; TNFRSF18; TOP2A; TSG101; WDR4; XRCC6; ZFP36L1; FKBP9; MSH2; POLR1C; RBM47; SDE2; CREM; ESYT2; ITIH4; JUP; NAAA; PPP1R…
Aspc1	18	483	8.29493	3.14382	1.93042e-05	0.01637	0.000208531	0.000820835	HNRNPH3; IL18; XRCC6; TCN2; TGFBI; SMPDL3A; TIMP2; FAM129B; ASNS; CFD; CTSS; CTSA; GNS; TPP1; GGH; CTSD; CTSC; HEXA;
R	44	1948	20.2765	1.90485	1.94268e-05	0.016474	0.000208531	0.000820835	CDK6; DOHH; FBXO7; FGFR1OP; IPO11; LRRC47; NCKAP1; NUDCD1; NUP62; PAF1; RAC1; RECQL; RNMT; SRP72; TOP2A; TRMT1; TSG101; TUBA1C; WDR4; CCDC9; CLUH; MSH2; POLR1C; CREM; KRT18; PHGDH; SMARCC1; OXSR1; ASNS; KRT8; CTSA; NPM3; PSAT1; MCM4; GNS; TPP1; NUB1; TPT1; CTSD; CTSC; FASN; NAGA; NCAPG2; SRM;
Liver	167	11680	76.9585	1.20559	2.01912e-05	0.0171222	0.000214027	0.000842469	ACSL5; APPL2; ARL6IP1; ATP2B4; ATRX; BICD2; CDK6; CHST11; CLEC1B; EFR3A; F2RL3; FAM45A; FBXO7; FGFR1OP; GIMAP8; GLRX; GORASP2; HDAC3; HEATR5B; HNRNPH3; IFNG; IL18; IL2; IPO11; KIAA1033; LIF; LRPAP1; LRRC47; LTA; M6PR; MMP8; NCKAP1; NUP62; PFKFB3; PI4KA; PMVK; PNKP; POLE3; PRF1; PRPSAP1; RAB3D; RAC1; RANGRF; RECQL; RNMT; RPS6KA1; SEMA3F; SEMA4D; SHOC2; SIGLEC5; SLC2A1; SLC31A1; SMPD1; SP100; SRP72…
Adducin	18	486	8.29493	3.12442	2.09572e-05	0.0177717	0.000219404	0.000863633	ADPGK; CDK6; GZMA; PRF1; TOP2A; TUBA1C; ZNF706; MSH2; GCDH; PHGDH; CCL5; CTSS; GBP2; NPM3; MIF; CTSD; CTSC; FASN;
Epididymis	114	7090	52.5346	1.3558	2.37598e-05	0.0201483	0.000242929	0.000956236	ATP2B4; ATRX; BICD2; CD226; CDK6; CLEC1B; EFR3A; GIMAP8; GLRX; GORASP2; HDAC3; IFNG; IL18; IL2; LIF; LRPAP1; LRRC47; LTA; MMP8; NCKAP1; NUDCD1; NUP62; OSM; PFKFB3; PI4KA; PMVK; PNKP; RAC1; RECQL; RPS6KA1; SEMA4D; SHOC2; SIGLEC5; SLC2A1; SLC31A1; SMPD1; SP100; SRP72; TNFRSF18; TSG101; WDR4; XRCC6; ZFP36L1; FKBP9; LAT; MSH2; RBM47; SDE2; CD300C; CREM; ESYT2; ITIH4; JUP; PPP1R14A; SYTL4; SPEG; HDAC4…
H520	25	843	11.5207	2.50139	2.37773e-05	0.0201631	0.000242929	0.000956236	GORASP2; HNRNPH3; LRRC47; SEMA4D; TNPO2; TSPAN5; TUBA1C; RRM1; KRT18; PHGDH; TIMP2; BID; KRT1; SLC1A5; GM2A; KRT8; PSAT1; MCM4; GGH; RBM3; TPT1; MIF; CTSD; CTSC; HEXA;
hupo1_b2-edta_cam	14	316	6.45161	3.73799	2.60527e-05	0.0220927	0.000263008	0.00103527	CNOT10; TUBA1C; ITIH4; C1QB; C1QA; PHGDH; KRT79; KRT1; OLFM1; C4BPA; CFP; C3; MIF; KRT10;
Testis	151	10269	69.5853	1.23987	2.95568e-05	0.0250642	0.000294873	0.0011607	ACSL5; APPL2; ATP2B4; ATRX; BICD2; CD226; CDK6; CHST11; CLEC1B; EFR3A; F2RL3; FBXO7; FGFR1OP; GIMAP8; GLRX; GORASP2; HDAC3; HEATR5B; HNRNPH3; IFNG; IL18; IL2; KIAA1033; LIF; LRPAP1; LRRC47; LTA; MMP8; NCKAP1; NUDCD1; NUP62; OSM; PFKFB3; PI4KA; PMVK; PNKP; PPP1R16B; PRPSAP1; RAB3D; RAC1; RECQL; RNMT; RPS6KA1; SEMA3F; SEMA4D; SHOC2; SIGLEC5; SLC2A1; SLC31A1; SMPD1; SP100; SRP72; SRSF12; TNFRSF18; T…
Saliva	26	912	11.9816	2.40459	3.16524e-05	0.0268413	0.000312108	0.00122854	GLRX; HNRNPH3; MMP8; XRCC6; JUP; TGFBI; FOLR1; KRT18; PHGDH; KRT5; KRT75; KRT79; KRT1; KRT8; CTSA; HSPA13; LRP1; KRT77; C3; SCPEP1; NEU1; TPT1; MIF; CTSD; CTSC; KRT10;
Malignant melanoma	118	7459	54.3779	1.33395	3.22703e-05	0.0273653	0.000314543	0.00123813	ATP2B4; ATRX; BICD2; CD226; CD27; CDK6; CLEC1B; EFR3A; GIMAP8; GLRX; GORASP2; IFNG; IL18; IL2; LIF; LRPAP1; LRRC47; LTA; MMP8; NCKAP1; NUDCD1; NUP62; OSM; PFKFB3; PI4KA; PMVK; PNKP; RAB3D; RAC1; RECQL; RPS6KA1; SEMA3F; SEMA4D; SHOC2; SIGLEC5; SLC2A1; SLC31A1; SMPD1; SP100; SRP72; TNFRSF18; TOP2A; TSG101; XRCC6; FKBP9; LAT; MSH2; RBM47; SDE2; IL2RA; CREM; ESYT2; ITIH4; PPP1R14A; SYTL4; TCN2; LDLRA…
Head & neck cancer	113	7062	52.0737	1.34924	3.47737e-05	0.0294881	0.000335092	0.00131901	ATP2B4; ATRX; BICD2; CD226; CDK6; CLEC1B; EFR3A; GIMAP8; GLRX; GORASP2; HDAC3; IFNG; IL18; IL2; LIF; LRPAP1; LRRC47; LTA; MMP8; NCKAP1; NUDCD1; NUP62; OSM; PFKFB3; PI4KA; PMVK; PNKP; RAB3D; RECQL; RPS6KA1; SEMA3F; SEMA4D; SHOC2; SIGLEC5; SLC2A1; SMPD1; SP100; SRP72; TNFRSF18; TOP2A; TSG101; XRCC6; ZFP36L1; FKBP9; LAT; MSH2; RBM47; SDE2; CREM; ESYT2; ITIH4; JUP; PPP1R14A; SYTL4; TCN2; LDLRAD2; HDA…
Pancreatic fluid	9	136	4.14747	5.5854	3.58088e-05	0.0303659	0.000341189	0.00134301	C1QA; KRT18; KRT5; KRT75; KRT79; KRT1; KRT8; KRT77; KRT10;
Natural killer cell	8	106	3.68664	6.37068	3.83104e-05	0.0324873	0.000360969	0.00142087	CLEC1B; GZMA; LAG3; GZMB; CD300C; CD69; CST7; CTSW;
WM1158	11	212	5.06912	4.37856	4.73076e-05	0.0401169	0.000440845	0.00173528	NUP62; SLC2A1; JUP; TGFBI; KRT18; PHGDH; KRT5; KRT1; KRT77; FASN; KRT10;
Lung cancer	117	7435	53.9171	1.32691	4.83372e-05	0.04099	0.000445543	0.00175378	ATP2B4; ATRX; BICD2; CD226; CDK6; CLEC1B; EFR3A; GIMAP8; GLRX; GORASP2; HDAC3; IFNG; IL18; IL2; LIF; LRPAP1; LRRC47; LTA; MMP8; NCKAP1; NUDCD1; NUP62; OSM; PFKFB3; PMVK; PNKP; RAB3D; RAC1; RECQL; RPS6KA1; SEMA3F; SEMA4D; SHOC2; SIGLEC5; SLC2A1; SLC31A1; SMPD1; SP100; SRP72; TNFRSF18; TOP2A; TSG101; XRCC6; ZFP36L1; FKBP9; MSH2; RBM47; SDE2; CREM; ESYT2; ITIH4; JUP; PPP1R14A; SYTL4; TCN2; SPEG; HDA…
Duodenum	115	7275	52.9954	1.33291	4.95258e-05	0.0419979	0.00045159	0.00177758	ATP2B4; ATRX; BICD2; CD226; CDK6; CLEC1B; EFR3A; GIMAP8; GLRX; GORASP2; HDAC3; IFNG; IL18; IL2; LIF; LRPAP1; LRRC47; LTA; MMP8; NCKAP1; NUDCD1; NUP62; OSM; PFKFB3; PMVK; PNKP; RAB3D; RAC1; RECQL; RPS6KA1; SEMA3F; SEMA4D; SHOC2; SIGLEC5; SLC2A1; SLC31A1; SMPD1; SP100; SRP72; TNFRSF18; TOP2A; TSG101; WDR4; XRCC6; ZFP36L1; FKBP9; LAT; MSH2; RBM47; SDE2; CREM; ESYT2; ITIH4; JUP; NAAA; SYTL4; LDLRAD2;…
MDA231	14	336	6.45161	3.51549	5.08582e-05	0.0431278	0.000458806	0.00180599	TUBA1C; TGFBI; TIMP2; FAM129B; PLBD2; CTSA; HSPA13; GNS; LIPA; TPP1; TPT1; CTSD; HEXA; FASN;
CD4	42	1901	19.3548	1.86324	5.23102e-05	0.044359	0.000466937	0.00183799	ARL6IP1; EXOSC5; GLRX; GORASP2; GZMA; HNRNPH3; LRRC47; PRF1; RAB3D; RAC1; RECQL; TUBA1C; ESYT2; NAAA; GFAP; C1QB; C1QA; RRM1; PHGDH; CCL5; KRT5; BID; OXSR1; KRT1; C4BPA; CTSS; RALB; SLC1A5; GBP2; CTSA; KRT77; C3; CTSH; TPP1; GGH; RBM3; TPT1; MIF; CTSD; CTSC; FASN; KRT10;
Urinary bladder	112	7054	51.6129	1.33882	5.80273e-05	0.0492072	0.000504072	0.00198416	ATP2B4; ATRX; BICD2; CD226; CDK6; CLEC1B; EFR3A; GIMAP8; GLRX; GORASP2; HDAC3; IFNG; IL18; IL2; LIF; LRPAP1; LRRC47; LTA; MMP8; NCKAP1; NUDCD1; NUP62; OSM; PFKFB3; PMVK; PNKP; RAB3D; RAC1; RECQL; RPS6KA1; SEMA3F; SEMA4D; SHOC2; SLC2A1; SMPD1; SP100; SRP72; TNFRSF18; TOP2A; TSG101; WDR4; XRCC6; ZFP36L1; FKBP9; MSH2; POLR1C; RBM47; SDE2; IL2RA; CD300C; CREM; ESYT2; ITIH4; JUP; PPP1R14A; SYTL4; SPEG…
Embryonic stem cells	59	3047	27.1889	1.63287	5.81032e-05	0.0492715	0.000504072	0.00198416	ADPGK; ARL6IP1; ATP2B4; EFR3A; GORASP2; HNRNPH3; IPO11; LRRC47; M6PR; NCKAP1; NUP62; PI4KA; RAC1; RECQL; RPS6KA1; SEMA4D; SLC2A1; SLC31A1; SRP72; SUCLG1; TOP2A; TUBA1C; XRCC6; CLUH; MSH2; NUP85; PRICKLE2; ESYT2; JUP; GCDH; TGFBI; RRM1; SLC29A1; KRT18; PHGDH; KRT5; BID; OXSR1; KRT1; ASNS; SLC1A5; B4GALT5; KRT8; MCM4; LRP1; SLC7A1; GLA; SCPEP1; TPP1; MIF; CTSD; FYN; CD320; CTSC; FASN; KRT10; NDRG3;…
Parathyroid	23	782	10.5991	2.48087	5.82536e-05	0.049399	0.000504072	0.00198416	ATRX; CDK6; RAC1; RPS6KA1; SLC2A1; TOP2A; TSG101; XRCC6; ZFP36L1; LAG3; CREM; ITIH4; JUP; SYTL4; HDAC4; KRT18; PHGDH; BID; PPP3R1; KRT8; GLA; MIF; NAGA;
Stomach	124	8044	57.1429	1.29982	5.93502e-05	0.050329	0.000508374	0.0020011	ATP2B4; ATRX; BICD2; CD226; CDK6; CHST11; CLEC1B; EFR3A; F2RL3; FGFR1OP; GIMAP8; GLRX; GORASP2; HDAC3; IFNG; IL18; IL2; LIF; LRPAP1; LRRC47; LTA; MMP8; NCKAP1; NUDCD1; NUP62; OSM; PFKFB3; PMVK; PNKP; RAB3D; RAC1; RECQL; RPS6KA1; SEMA3F; SEMA4D; SHOC2; SIGLEC5; SLC2A1; SLC31A1; SMPD1; SP100; SRP72; TNFRSF18; TOP2A; TSG101; WDR4; XRCC6; ZFP36L1; FKBP9; LAT; MSH2; RBM47; SDE2; IL2RA; CD300C; CREM; E…
Corpus, uterine	111	6997	51.1521	1.33767	6.84459e-05	0.0580422	0.000580422	0.0022847	ATP2B4; ATRX; BICD2; CD226; CDK6; CLEC1B; EFR3A; GIMAP8; GLRX; GORASP2; HDAC3; IFNG; IL18; IL2; LIF; LRPAP1; LRRC47; LTA; MMP8; NCKAP1; NUDCD1; NUP62; OSM; PFKFB3; PI4KA; PMVK; PNKP; PRF1; RAB3D; RAC1; RECQL; RPS6KA1; SEMA4D; SIGLEC5; SLC2A1; SLC31A1; SMPD1; SP100; SRP72; TNFRSF18; TOP2A; TSG101; XRCC6; ZFP36L1; FKBP9; LAT; MSH2; RBM47; SDE2; GZMB; CD300C; CREM; ESYT2; ITIH4; JUP; NAAA; PPP1R14A;…
Appendix	111	7004	51.1521	1.33634	7.18079e-05	0.0608931	0.000602902	0.00237319	ATP2B4; ATRX; BICD2; CD226; CD27; CDK6; CLEC1B; EFR3A; GIMAP8; GLRX; GORASP2; HDAC3; IFNG; IL18; IL2; LIF; LRPAP1; LRRC47; MMP8; NCKAP1; NUDCD1; NUP62; OSM; PFKFB3; PI4KA; PMVK; PNKP; RECQL; RPS6KA1; SEMA3F; SEMA4D; SLC2A1; SLC31A1; SMPD1; SP100; SRP72; TNFRSF18; TOP2A; TSG101; WDR4; XRCC6; ZFP36L1; FKBP9; LAT; MSH2; RBM47; SDE2; IL2RA; LAG3; GZMB; CREM; ESYT2; JUP; NAAA; PPP1R14A; SYTL4; HDAC4; …
17_wcx	34	1438	15.6682	1.99409	8.36969e-05	0.0709749	0.000695833	0.00273899	ATP2B4; CNOT10; EXOSC5; M6PR; NUP62; SHOC2; THOC2; TUBA1C; DCK; POLR1C; JUP; GCDH; LIMD1; TGFBI; C1QB; C1QA; KRT18; PHGDH; KRT5; KRT1; C4BPA; KRT8; PLBD2; NPM3; PSAT1; MCM4; GNS; C3; CTSH; TPT1; MIF; CTSD; FASN; KRT10;
Thyroid cancer	114	7281	52.5346	1.32024	8.98602e-05	0.0762014	0.00073982	0.00291213	ATP2B4; ATRX; BICD2; CD226; CDK6; CLEC1B; EFR3A; GIMAP8; GLRX; GORASP2; HDAC3; IFNG; IL18; IL2; LIF; LRPAP1; LRRC47; LTA; MMP8; NCKAP1; NUDCD1; NUP62; OSM; PFKFB3; PI4KA; PMVK; PNKP; RAB3D; RAC1; RECQL; RPS6KA1; SEMA3F; SEMA4D; SHOC2; SIGLEC5; SLC2A1; SLC31A1; SMPD1; SP100; SRP72; TNFRSF18; TOP2A; TSG101; XRCC6; ZFP36L1; FKBP9; MSH2; POLR1C; RBM47; SDE2; CD300C; CREM; ESYT2; ITIH4; JUP; PPP1R14A;…
Lens	27	1037	12.4424	2.19605	0.000103392	0.0876765	0.000843044	0.00331845	ADPGK; CNOT10; DOHH; EXOSC5; GLRX; LRRC47; RAC1; TNPO2; TRMT1; TUBA1C; RRM1; IDO1; PHGDH; OXSR1; KRT1; ASNS; CTSS; KRT8; CTSA; PSAT1; MCM4; KRT77; TPT1; MIF; CTSD; FASN; SRM;
Sy5y	50	2490	23.0415	1.69339	0.000104643	0.0887373	0.000845117	0.00332661	ARL6IP1; ATP2B4; EXOSC5; FAM45A; GLRX; HNRNPH3; LRRC47; M6PR; NUP62; PMVK; PNKP; PRPSAP1; RAC1; RNMT; SEMA4D; SHOC2; SRP72; SRSF12; WBSCR22; XRCC6; MSH2; NCBP2; POLR1C; ESYT2; ITIH4; JUP; CAMSAP3; C1QB; RRM1; PHGDH; KRT5; KRT75; KRT79; BID; KRT1; GM2A; KRT8; CTSA; KRT77; SCPEP1; TPP1; GGH; RBM3; TPT1; MIF; CTSD; CTSC; FASN; KRT10; NDRG3;
hupo1_b2-cit_cam	6	65	2.76498	7.79462	0.00011972	0.101522	0.000946247	0.00372468	TUBA1C; GFAP; KRT5; KRT1; C4BPA; KRT10;
22_mars	10	196	4.60829	4.30582	0.000120208	0.101936	0.000946247	0.00372468	TGFBI; C1QB; C1QA; KRT1; C4BPA; CFP; KRT77; C3; GGH; KRT10;
Malignant carcinoid	111	7081	51.1521	1.3218	0.000120513	0.102195	0.000946247	0.00372468	ATP2B4; ATRX; BICD2; CDK6; CLEC1B; EFR3A; GIMAP8; GLRX; GORASP2; HDAC3; IFNG; IL18; IL2; LIF; LRPAP1; LRRC47; LTA; MMP8; NCKAP1; NUDCD1; NUP62; OSM; PFKFB3; PI4KA; PMVK; PNKP; RAB3D; RAC1; RECQL; RPS6KA1; SEMA4D; SHOC2; SIGLEC5; SLC2A1; SLC31A1; SMPD1; SP100; SRP72; TNFRSF18; TOP2A; TSG101; WDR4; XRCC6; ZFP36L1; FKBP9; MSH2; RBM47; SDE2; CD300C; CREM; ESYT2; ITIH4; JUP; NAAA; PPP1R14A; SYTL4; LDL…
MCF10A	20	661	9.21659	2.55235	0.000123756	0.104945	0.000946985	0.00372759	ATP2B4; GLRX; HNRNPH3; LRRC47; TUBA1C; XRCC6; TGFBI; TIMP2; FAM129B; KRT5; KRT1; GM2A; TPP1; GGH; RBM3; TPT1; MIF; CTSD; CTSC; KRT10;
BT474	18	558	8.29493	2.72127	0.000123906	0.105072	0.000946985	0.00372759	HNRNPH3; LRRC47; TUBA1C; XRCC6; KRT18; KRT1; GM2A; KRT8; GNS; CTSH; GGH; RBM3; TPT1; MIF; CTSD; HEXA; FASN; KRT10;
Testis cancer	113	7248	52.0737	1.31461	0.000123957	0.105115	0.000946985	0.00372759	ATP2B4; ATRX; BICD2; CDK6; CLEC1B; EFR3A; GIMAP8; GLRX; GORASP2; HDAC3; IFNG; IL18; IL2; LIF; LRPAP1; LRRC47; LTA; MMP8; NCKAP1; NUDCD1; NUP62; OSM; PFKFB3; PI4KA; PMVK; PNKP; RAB3D; RAC1; RECQL; RPS6KA1; SEMA4D; SHOC2; SLC2A1; SLC31A1; SMPD1; SP100; SRP72; TOP2A; TSG101; XRCC6; ZFP36L1; FKBP9; MSH2; RBM47; SDE2; CREM; ESYT2; ITIH4; JUP; PPP1R14A; SYTL4; TCN2; LDLRAD2; SPEG; HDAC4; TGFBI; C1QA; M…
Cerebral cortex	111	7099	51.1521	1.31845	0.000135672	0.11505	0.00102723	0.00404347	APPL2; ATP2B4; ATRX; BICD2; CD226; CDK6; CHST11; CLEC1B; EFR3A; FBXO7; GIMAP8; GLRX; GORASP2; HDAC3; IL18; LIF; LRPAP1; LRRC47; LTA; MMP8; NCKAP1; NUDCD1; NUP62; OSM; PFKFB3; PI4KA; PMVK; PNKP; RAB3D; RAC1; RECQL; RPS6KA1; SEMA3F; SEMA4D; SHOC2; SIGLEC5; SLC2A1; SMPD1; SP100; SRP72; TOP2A; TSG101; XRCC6; FKBP9; MSH2; POLR1C; RBM47; SDE2; CD300C; CREM; ESYT2; ITIH4; NAAA; PPP1R14A; SYTL4; LDLRAD2;…
Cervico-vaginal fluid	18	565	8.29493	2.68756	0.000144657	0.122669	0.00108557	0.00427309	ATRX; GLRX; HNRNPH3; MMP8; ITIH4; JUP; PHGDH; FAM129B; KRT75; C4BPA; CTSS; GM2A; CTSA; CFP; CTSH; GGH; CTSD; FASN;
Skin cancer	110	7029	50.6912	1.31959	0.000145944	0.123761	0.00108562	0.00427329	ATP2B4; ATRX; BICD2; CD226; CDK6; CLEC1B; EFR3A; GIMAP8; GLRX; GORASP2; HDAC3; IFNG; IL18; IL2; LIF; LRPAP1; LRRC47; LTA; MMP8; NCKAP1; NUDCD1; NUP62; OSM; PFKFB3; PMVK; PNKP; RAB3D; RAC1; RECQL; RPS6KA1; SEMA3F; SEMA4D; SLC2A1; SMPD1; SP100; SRP72; TNFRSF18; TOP2A; TSG101; XRCC6; ZFP36L1; FKBP9; MSH2; POLR1C; SDE2; CREM; ESYT2; ITIH4; JUP; PPP1R14A; SYTL4; TCN2; SPEG; HDAC4; C1QA; SMPDL3A; RRM1;…
Amniotic fluid	18	566	8.29493	2.68281	0.000147858	0.125384	0.00109029	0.00429168	SLC2A1; TUBA1C; ITIH4; TGFBI; C1QB; KRT18; TIMP2; FAM129B; KRT5; KRT1; CFD; GM2A; KRT8; LRP1; C3; MIF; CTSD; HEXA;
	29	1183	13.3641	2.06757	0.000160237	0.135881	0.00117139	0.00461091	ARL6IP1; ATP2B4; IPO11; NCKAP1; PI4KA; RAB3D; RAC1; RPS6KA1; SLC2A1; TNPO2; DCK; ESYT2; ITIH4; JUP; TGFBI; MRC1; TIMP2; FAM129B; RALB; SLC1A5; CTSA; LRP1; RBM3; MIF; CTSD; FYN; FASN; GUCY1B3; MERTK;
Vulva	23	838	10.5991	2.31509	0.0001629	0.138139	0.00118068	0.00464746	ATRX; CDK6; PRF1; RPS6KA1; SLC2A1; TOP2A; TSG101; XRCC6; ZFP36L1; CREM; JUP; SYTL4; TCN2; HDAC4; PHGDH; KRT5; KRT1; C4BPA; PPP3R1; C3; MIF; CTSD; KRT10;
19_proteinag	7	98	3.22581	6.03043	0.000166234	0.140967	0.00119463	0.0047024	JUP; C1QA; KRT5; KRT1; C4BPA; KRT77; KRT10;
hupo53_reference_cam	7	104	3.22581	5.68255	0.00024043	0.203884	0.00171331	0.00674407	C1QB; C1QA; KRT1; C4BPA; CFP; C3; KRT10;
Cervix, uterine	101	6391	46.5438	1.33259	0.000254486	0.215804	0.00179837	0.00707887	ATP2B4; ATRX; BICD2; CDK6; CLEC1B; EFR3A; GIMAP8; GLRX; GORASP2; IFNG; IL18; IL2; LIF; LRPAP1; LRRC47; LTA; MMP8; NCKAP1; NUDCD1; NUP62; OSM; PFKFB3; PMVK; PNKP; RAB3D; RECQL; RPS6KA1; SEMA3F; SEMA4D; SHOC2; SIGLEC5; SLC2A1; SMPD1; SP100; SRP72; TOP2A; TSG101; XRCC6; ZFP36L1; FKBP9; MSH2; RBM47; SDE2; CD300C; ESYT2; ITIH4; JUP; TCN2; SPEG; HDAC4; GZMH; C1QA; MMP12; SMPDL3A; RRM1; IDO1; CSF3; SLC2…
041803_BALF3	27	1103	12.4424	2.06465	0.000280634	0.237978	0.00195815	0.00770782	DOHH; GLRX; GORASP2; HNRNPH3; LRRC47; MMP8; NUP62; PAF1; SHOC2; TRMT1; TUBA1C; ITIH4; LIMD1; C1QB; C1QA; RRM1; PHGDH; C4BPA; MCM4; IL1B; LIPA; TPP1; TPT1; MIF; CTSC; HEXA; FASN;
Gall bladder	112	7295	51.6129	1.29459	0.000281715	0.238894	0.00195815	0.00770782	ATP2B4; ATRX; BICD2; CD226; CDK6; CLEC1B; EFR3A; GIMAP8; GLRX; GORASP2; IFNG; IL18; IL2; LIF; LRPAP1; LRRC47; LTA; MMP8; NCKAP1; NUDCD1; NUP62; OSM; PFKFB3; PMVK; PNKP; RAB3D; RAC1; RECQL; RPS6KA1; SEMA4D; SHOC2; SIGLEC5; SLC2A1; SMPD1; SP100; SRP72; TNFRSF18; TOP2A; TSG101; WDR4; XRCC6; ZFP36L1; FKBP9; LAT; MSH2; POLR1C; RBM47; SDE2; CD300C; CREM; ESYT2; ITIH4; JUP; NAAA; PPP1R14A; SYTL4; LDLRAD…
Oral mucosa	94	5861	43.318	1.35239	0.000297608	0.252372	0.0020518	0.00807645	ATP2B4; ATRX; BICD2; CDK6; CLEC1B; EFR3A; GIMAP8; GLRX; GORASP2; HDAC3; IFNG; IL18; IL2; LIF; LRPAP1; LRRC47; MMP8; NCKAP1; NUP62; OSM; PFKFB3; PMVK; PNKP; PRF1; RECQL; RPS6KA1; SEMA3F; SEMA4D; SHOC2; SIGLEC5; SLC2A1; SMPD1; SP100; SRP72; TOP2A; TSG101; XRCC6; ZFP36L1; FKBP9; MSH2; POLR1C; SDE2; CD300C; ITIH4; JUP; NAAA; SYTL4; LDLRAD2; SPEG; HDAC4; C1QA; SMPDL3A; RRM1; IDO1; SLC29A1; KRT18; PHGD…
Adrenal glands	115	7554	52.9954	1.28368	0.000305241	0.258844	0.00208745	0.00821679	ATP2B4; ATRX; BICD2; CD226; CDK6; CHST11; CLEC1B; EFR3A; F2RL3; FGFR1OP; GIMAP8; GLRX; GORASP2; IFNG; IL18; IL2; LIF; LRPAP1; LRRC47; LTA; MMP8; NCKAP1; NUDCD1; NUP62; OSM; PFKFB3; PI4KA; PMVK; PNKP; PRPSAP1; RAB3D; RECQL; RPS6KA1; SEMA3F; SEMA4D; SIGLEC5; SLC31A1; SMPD1; SP100; SRP72; TNFRSF18; TOP2A; TSG101; ZFP36L1; FKBP9; LAT; MSH2; POLR1C; RBM47; SDE2; CD300C; CREM; ESYT2; ITIH4; NAAA; PPP1R…
Fallopian tubes	104	6677	47.9263	1.31339	0.000340632	0.288856	0.00231084	0.00909611	ATP2B4; ATRX; BICD2; CD226; CDK6; CLEC1B; EFR3A; GIMAP8; GLRX; GORASP2; IL18; IL2; LIF; LRPAP1; LRRC47; LTA; MMP8; NCKAP1; NUDCD1; NUP62; OSM; PFKFB3; PI4KA; PMVK; PNKP; RAC1; RECQL; RPS6KA1; SEMA4D; SIGLEC5; SLC2A1; SLC31A1; SMPD1; SP100; SRP72; TNFRSF18; TOP2A; TSG101; XRCC6; ZFP36L1; FKBP9; MSH2; RBM47; SDE2; CREM; ESYT2; ITIH4; JUP; NAAA; SYTL4; LDLRAD2; SPEG; HDAC4; C1QA; SMPDL3A; RRM1; IDO1…
Salivary glands	103	6607	47.4654	1.31454	0.0003634	0.308163	0.00244574	0.00962709	ATP2B4; ATRX; BICD2; CDK6; CHST11; CLEC1B; EFR3A; GIMAP8; GLRX; GORASP2; IFNG; IL18; LIF; LRPAP1; LRRC47; LTA; NUDCD1; NUP62; OSM; PFKFB3; PI4KA; PMVK; PNKP; RAB3D; RAC1; RECQL; RPS6KA1; SEMA3F; SEMA4D; SMPD1; SP100; SRP72; TNFRSF18; TSG101; WDR4; XRCC6; CXCL10; FKBP9; MSH2; POLR1C; RBM47; SDE2; CREM; ESYT2; ITIH4; JUP; NAAA; PPP1R14A; SYTL4; TCN2; LDLRAD2; HDAC4; C1QA; MMP12; SMPDL3A; IDO1; CSF3…
051503_BAL20_gly_hui	11	268	5.06912	3.46367	0.000370439	0.314133	0.00247348	0.00973631	ARL6IP1; SLC2A1; TNPO2; TUBA1C; LAT; PHGDH; KRT1; C4BPA; C3; CTSH; KRT10;
Thyroid	23	889	10.5991	2.18228	0.00037879	0.321214	0.00250948	0.009878	ATRX; CDK6; RPS6KA1; SLC2A1; TSG101; XRCC6; ZFP36L1; CREM; JUP; SYTL4; HDAC4; CSF3; KRT18; PHGDH; CTSS; PPP3R1; CEP128; KRT8; C3; GLA; MIF; CTSD; NAGA;
Prostate	119	7923	54.8387	1.26647	0.000384804	0.326314	0.00252521	0.00993991	ACSL5; ATRX; CD226; CDK6; CHST11; CLEC1B; EFR3A; F2RL3; FGFR1OP; GIMAP8; GLRX; GORASP2; HDAC3; HEATR5B; IFNG; IL18; IL2; LIF; LRPAP1; LRRC47; LTA; MMP8; NCKAP1; NUP62; OSM; PFKFB3; PI4KA; PMVK; PNKP; RAB3D; RAC1; RPS6KA1; SEMA3F; SEMA4D; SLC2A1; SLC31A1; SMPD1; SP100; SRP72; TOP2A; TSG101; XRCC6; ZFP36L1; DXO; FKBP9; MSH2; RBM47; SDE2; IL2RA; CD300C; CREM; ESYT2; ITIH4; JUP; NAAA; PPP1R14A; SYTL4…
Vulva/anal skin	100	6377	46.0829	1.32229	0.000387119	0.328277	0.00252521	0.00993991	ATP2B4; ATRX; BICD2; CDK6; CLEC1B; EFR3A; GIMAP8; GLRX; GORASP2; IL18; IL2; LIF; LRPAP1; LRRC47; MMP8; NCKAP1; NUP62; OSM; PFKFB3; PI4KA; PMVK; PNKP; PRF1; RAB3D; RECQL; RPS6KA1; SEMA3F; SEMA4D; SHOC2; SIGLEC5; SLC2A1; SLC31A1; SMPD1; SP100; SRP72; TOP2A; TSG101; WDR4; XRCC6; ZFP36L1; FKBP9; MSH2; POLR1C; SDE2; ESYT2; ITIH4; JUP; PPP1R14A; TCN2; LDLRAD2; SPEG; HDAC4; GZMH; C1QA; MMP12; SMPDL3A; R…
Parathyroid gland	95	5997	43.7788	1.33578	0.000430833	0.365346	0.00277352	0.0109173	ATP2B4; ATRX; BICD2; CDK6; CLEC1B; EFR3A; GIMAP8; GLRX; GORASP2; IFNG; IL18; IL2; LIF; LRPAP1; LRRC47; LTA; NCKAP1; NUP62; OSM; PFKFB3; PI4KA; PMVK; PNKP; RAC1; RECQL; RPS6KA1; SEMA4D; SHOC2; SIGLEC5; SLC2A1; SLC31A1; SMPD1; SP100; SRP72; TNFRSF18; TOP2A; TSG101; WDR4; XRCC6; ZFP36L1; FKBP9; MSH2; RBM47; SDE2; LAG3; CREM; ESYT2; ITIH4; JUP; PPP1R14A; LDLRAD2; HDAC4; C1QA; MMP12; SMPDL3A; CTSW; RR…
Small intestine	124	8360	57.1429	1.25069	0.000431727	0.366105	0.00277352	0.0109173	ACSL5; ATP2B4; ATRX; BICD2; CDK6; CHST11; CLEC1B; EFR3A; F2RL3; FGFR1OP; GIMAP8; GLRX; GORASP2; HDAC3; IFNG; IL18; IL2; LIF; LRPAP1; LRRC47; LTA; MMP8; NCKAP1; NUDCD1; NUP62; OSM; PFKFB3; PI4KA; PMVK; PNKP; RAB3D; RAC1; RECQL; RPS6KA1; SEMA3F; SEMA4D; SIGLEC5; SLC2A1; SLC31A1; SMPD1; SP100; SRP72; TOP2A; TSG101; WDR4; XRCC6; ZFP36L1; DXO; FKBP9; LAT; MSH2; RBM47; SDE2; CREM; ESYT2; ITIH4; JUP; NA…
HPDE6	14	414	6.45161	2.85317	0.000443274	0.375896	0.00282629	0.011125	TGFBI; SMPDL3A; TIMP2; PLBD2; CTSA; GNS; C3; CTSH; TPP1; GGH; CTSD; CTSC; HEXA; FASN;
Soft tissue	107	6969	49.3088	1.29465	0.000462764	0.392424	0.00292854	0.0115275	ATP2B4; ATRX; BICD2; CD226; CDK6; CLEC1B; EFR3A; GIMAP8; GLRX; GORASP2; IFNG; IL18; IL2; LIF; LRPAP1; LRRC47; LTA; MMP8; NCKAP1; NUDCD1; NUP62; OSM; PI4KA; PMVK; PNKP; RAB3D; RAC1; RECQL; RPS6KA1; SEMA3F; SEMA4D; SHOC2; SIGLEC5; SLC2A1; SLC31A1; SMPD1; SP100; SRP72; TNFRSF18; TOP2A; TSG101; XRCC6; FKBP9; LAT; MSH2; SDE2; LAG3; CD300C; CREM; ESYT2; ITIH4; NAAA; PPP1R14A; LDLRAD2; SPEG; HDAC4; GFAP…
Breast	100	6413	46.0829	1.31487	0.000484448	0.410812	0.00304305	0.0119783	ATP2B4; ATRX; BICD2; CD226; CDK6; CLEC1B; EFR3A; GIMAP8; GLRX; GORASP2; HDAC3; IL2; LIF; LRPAP1; LRRC47; MMP8; NCKAP1; NUDCD1; NUP62; OSM; PFKFB3; PI4KA; PMVK; PNKP; RAB3D; RAC1; RECQL; RPS6KA1; SEMA3F; SEMA4D; SHOC2; SIGLEC5; SLC2A1; SMPD1; SP100; SRP72; TNFRSF18; TOP2A; TSG101; XRCC6; ZFP36L1; FKBP9; MSH2; POLR1C; SDE2; CREM; ESYT2; ITIH4; JUP; NAAA; PPP1R14A; SYTL4; LDLRAD2; SPEG; HDAC4; C1QA;…
LNCaP	32	1455	14.7465	1.8549	0.000502168	0.425839	0.00313117	0.0123251	CHST11; GIMAP8; GLRX; HNRNPH3; SEMA3F; SEMA4D; TSG101; TUBA1C; XRCC6; JUP; NOTCH2; GFAP; KRT18; PHGDH; TIMP2; KRT1; ASNS; GM2A; KRT8; CTSA; PSAT1; GNS; CTSH; ANG; TPP1; GGH; RBM3; TPT1; MIF; CTSD; FASN; KRT10;
15_clinprot_c3	20	749	9.21659	2.25247	0.000622417	0.527809	0.00385262	0.015165	EXOSC5; NUP62; SRP72; TUBA1C; MSH2; JUP; PHGDH; KRT5; SMARCC1; KRT1; C4BPA; NPM3; KRT77; C3; CTSH; RBM3; TPT1; MIF; CTSC; KRT10;
Lateral ventricle	102	6620	47.0046	1.29923	0.000643341	0.545553	0.00395328	0.0155612	ATRX; BICD2; CD226; CLEC1B; EFR3A; GIMAP8; GLRX; GORASP2; HDAC3; IL18; IL2; LIF; LRPAP1; LRRC47; LTA; NCKAP1; NUDCD1; NUP62; OSM; PFKFB3; PMVK; PNKP; RAB3D; RAC1; RECQL; RPS6KA1; SEMA3F; SEMA4D; SHOC2; SIGLEC5; SLC2A1; SLC31A1; SMPD1; SP100; SRP72; TOP2A; TSG101; XRCC6; FKBP9; LAT; MSH2; SDE2; CD300C; CREM; NAAA; PPP1R14A; SYTL4; LDLRAD2; SPEG; HDAC4; GZMH; TGFBI; GFAP; C1QA; MMP12; SMPDL3A; CTSW…
Gastric juice	10	243	4.60829	3.47304	0.000667662	0.566177	0.00405216	0.0159504	JUP; FOLR1; KRT5; KRT1; CTSS; GM2A; KRT8; C3; CTSD; KRT10;
Rectum	108	7113	49.7696	1.2803	0.000672417	0.57021	0.00405216	0.0159504	ATP2B4; ATRX; BICD2; CDK6; CLEC1B; EFR3A; GIMAP8; GLRX; GORASP2; HDAC3; IFNG; IL18; IL2; LIF; LRPAP1; LRRC47; LTA; MMP8; NCKAP1; NUDCD1; NUP62; OSM; PFKFB3; PMVK; PNKP; RAB3D; RAC1; RECQL; RPS6KA1; SEMA3F; SEMA4D; SHOC2; SIGLEC5; SLC2A1; SMPD1; SP100; SRP72; TNFRSF18; TOP2A; TSG101; WDR4; XRCC6; ZFP36L1; FKBP9; LAT; MSH2; RBM47; SDE2; CREM; ESYT2; ITIH4; JUP; NAAA; PPP1R14A; SYTL4; LDLRAD2; SPEG;…
Ciliary body	3	15	1.38249	16.9078	0.000673768	0.571355	0.00405216	0.0159504	GLRX; IDO1; CTSD;
Embryonal carcinoma cells	28	1232	12.9032	1.9169	0.000701233	0.594646	0.00418765	0.0164837	ARL6IP1; ATP2B4; CNOT10; LRRC47; M6PR; RAC1; SEMA4D; SLC2A1; SLC31A1; MSH2; ESYT2; JUP; NOTCH2; SLC29A1; KRT18; PHGDH; KRT5; KRT1; RALB; SLC1A5; KRT8; MCM4; LRP1; SLC7A1; GLA; FASN; KRT10; SLC44A1;
Leukocytes	52	2845	23.9631	1.54136	0.000754103	0.639479	0.00447188	0.0176026	ACSL5; CHST11; EFR3A; FGFR1OP; GIMAP8; GLRX; HDAC3; HNRNPH3; IL2; MMP8; NUDCD1; PI4KA; PRF1; RAB3D; RECQL; SIGLEC5; SLC31A1; TSG101; WDR4; XRCC6; DXO; MSH2; IL2RA; LIMD1; HDAC4; CST7; CCL5; AOAH; OXSR1; CTSS; GM2A; B4GALT5; NPL; CTSA; NPM3; CFP; GNS; VPS13A; C3; ST8SIA4; SCPEP1; LIPA; TPP1; GGH; NUB1; TPT1; MIF; CTSD; CTSC; FASN; NDRG3; SLC44A1;
HeLa	91	5789	41.9355	1.32552	0.000841389	0.713498	0.00495484	0.0195036	APPL2; ATRX; BICD2; CDK6; DOHH; EFR3A; EXOSC5; GLRX; HDAC3; HNRNPH3; IL18; IPO11; KIAA1033; LRPAP1; LRRC47; NCKAP1; NUDCD1; NUP62; PI4KA; PMVK; POLE3; RAB3D; RAC1; RANGRF; RPS6KA1; SEMA3F; SEMA4D; SRP72; TNPO2; TOP2A; TRMT1; TSG101; TUBA1C; WDR4; XRCC6; ZFP36L1; ZNF706; CLUH; DCK; MSH2; NCBP2; NUP85; POLR1C; LAG3; ESYT2; JUP; PPP1R14A; GCDH; SPEG; HDAC4; GFAP; MMP12; FOLR1; MRC1; RRM1; KRT18; PHG…
Neutrophils	13	393	5.99078	2.79109	0.000865541	0.733979	0.00506192	0.0199251	GLRX; MMP8; RAB3D; CXCL10; CD69; BID; AOAH; RNASE6; CFP; TPP1; MIF; HEXA; SLC44A1;
BOB_Sensitivity	7	129	3.22581	4.58137	0.000882044	0.747974	0.00512311	0.0201659	ITIH4; C1QA; KRT5; KRT1; C4BPA; KRT77; KRT10;
H1688	24	1007	11.0599	2.01029	0.000902167	0.765037	0.00520434	0.0204857	CHST11; GORASP2; HNRNPH3; TOP2A; TUBA1C; XRCC6; TCN2; PHGDH; TIMP2; SMARCC1; LIPG; GM2A; KRT8; PLBD2; CTSA; GNS; ANG; TPP1; GGH; NEU1; MIF; CTSD; CTSC; HEXA;
Malignant glioma	108	7169	49.7696	1.2703	0.00092917	0.787937	0.0053239	0.0209563	ATP2B4; ATRX; BICD2; CDK6; CLEC1B; EFR3A; GIMAP8; GLRX; GORASP2; HDAC3; IL18; IL2; LIF; LRPAP1; LRRC47; LTA; MMP8; NCKAP1; NUDCD1; NUP62; OSM; PFKFB3; PI4KA; PMVK; PNKP; RAB3D; RAC1; RECQL; RPS6KA1; SEMA3F; SEMA4D; SIGLEC5; SLC2A1; SLC31A1; SMPD1; SP100; SRP72; TOP2A; TSG101; XRCC6; FKBP9; MSH2; RBM47; SDE2; CD300C; CREM; ESYT2; ITIH4; PPP1R14A; SYTL4; LDLRAD2; HDAC4; GFAP; C1QA; MMP12; SMPDL3A; …
21_unfract	6	95	2.76498	5.33342	0.000938621	0.795951	0.00534195	0.0210274	C1QA; KRT5; KRT1; C4BPA; C3; KRT10;
BOB2L	6	96	2.76498	5.27787	0.000991455	0.840754	0.00560503	0.0220629	ITIH4; C1QA; KRT5; KRT1; C4BPA; KRT10;
Colon	123	8429	56.682	1.23045	0.0010277	0.871487	0.00577144	0.0227179	ACSL5; APPL2; ATP2B4; ATRX; BICD2; CD226; CDK6; CHST11; CLEC1B; EFR3A; F2RL3; FGFR1OP; GIMAP8; GLRX; GORASP2; HDAC3; IFNG; IL18; IL2; LIF; LRPAP1; LRRC47; LTA; MMP8; NCKAP1; NUDCD1; NUP62; OSM; PFKFB3; PI4KA; PMVK; PNKP; RAB3D; RAC1; RPS6KA1; SEMA3F; SEMA4D; SIGLEC5; SLC2A1; SLC31A1; SMPD1; SP100; SRP72; TNFRSF18; TOP2A; TSG101; WDR4; XRCC6; ZFP36L1; DXO; FKBP9; LAT; MSH2; RBM47; SDE2; CREM; ESYT…
BOB2H_ISB	6	98	2.76498	5.17017	0.00110396	0.936156	0.00615892	0.0242432	ITIH4; C1QA; KRT1; C4BPA; KRT77; KRT10;
Brain	109	7290	50.2304	1.26078	0.00115929	0.983082	0.00642537	0.025292	ACSL5; APPL2; ARL6IP1; ATP2B4; ATRX; BICD2; CDK6; CHST11; EFR3A; FBXO7; FGFR1OP; GIMAP8; GLRX; GORASP2; GZMA; HDAC3; HNRNPH3; IL2; IPO11; KIAA1033; LRPAP1; LRRC47; M6PR; NCKAP1; PFKFB3; PI4KA; PMVK; PNKP; POLE3; PPP1R16B; PRF1; PRPSAP1; RAB3D; RAC1; RANGRF; RNMT; RPS6KA1; SEMA3F; SEMA4D; SHOC2; SLC2A1; SLC31A1; SUCLG1; TNPO2; TSPAN5; TUBA1C; WBSCR22; WDR4; XRCC6; DCK; DXO; MSH2; POLR1C; PPP2R5B; …
HUVEC	161	13061	74.1935	1.03939	0.199659	1	0.5515	1	ACSL5; APPL2; ATP2B4; ATRX; BICD2; CD226; CD27; CDK6; CLEC1B; CLN5; CNOT10; EFR3A; EXOSC5; FAM45A; FBXO7; GORASP2; GZMA; HDAC3; HEATR5B; HNRNPH3; IL18; IL2; IPO11; KIAA1033; LIF; LRPAP1; LRRC47; LTA; MMP8; NCKAP1; NUDCD1; OSM; PFKFB3; PI4KA; PNKP; PPP1R16B; PRF1; RAB3D; RANGRF; RECQL; RNMT; RPS6KA1; SEMA3F; SEMA4D; SIGLEC5; SMPD1; SP100; SRP72; SRSF12; THOC2; TNFRSF18; TNFRSF4; TNPO2; TOP2A; TRMT…
Skeletal muscles	124	9060	57.1429	1.15406	0.0140998	1	0.0588997	0.231845	ACSL5; APPL2; ATP2B4; ATRX; BICD2; CDK6; CLEC1B; CLN5; EFR3A; F2RL3; FBXO7; GIMAP8; GLRX; GORASP2; HDAC3; HEATR5B; HNRNPH3; IFNG; IL18; IL2; IPO11; KIAA1033; LIF; LRPAP1; LRRC47; LTA; MMP8; NCKAP1; NUDCD1; NUP62; PFKFB3; PI4KA; PMVK; PNKP; RAB3D; RAC1; RANGRF; RECQL; RNMT; RPS6KA1; SEMA4D; SHOC2; SIGLEC5; SLC2A1; SLC31A1; SMPD1; SP100; SRP72; SUCLG1; TSG101; TUBA1C; WBSCR22; WDR4; XRCC6; CLUH; DX…
Cerebellum	109	7633	50.2304	1.20412	0.00666269	1	0.0303761	0.119569	APPL2; ATP2B4; ATRX; BICD2; CDK6; CHST11; CLEC1B; EFR3A; FBXO7; GIMAP8; GLRX; GORASP2; HDAC3; HEATR5B; IL18; IL2; KIAA1033; LIF; LRPAP1; LRRC47; LTA; MMP8; NCKAP1; NUDCD1; NUP62; OSM; PFKFB3; PI4KA; PMVK; PNKP; PPP1R16B; RAB3D; RAC1; RECQL; RNMT; RPS6KA1; SEMA3F; SEMA4D; SHOC2; SIGLEC5; SLC2A1; SMPD1; SP100; SRP72; TOP2A; TSG101; WDR4; XRCC6; MSH2; SDE2; CREM; ESYT2; ITIH4; PPP1R14A; SYTL4; CAMSA…
Nasopharynx	103	6904	47.4654	1.25799	0.00203716	1	0.0107299	0.0422358	ATP2B4; ATRX; BICD2; CDK6; CLEC1B; EFR3A; GIMAP8; GLRX; GORASP2; IFNG; IL18; IL2; LIF; LRPAP1; LRRC47; MMP8; NCKAP1; NUDCD1; NUP62; OSM; PFKFB3; PMVK; PNKP; RAC1; RECQL; RPS6KA1; SEMA3F; SEMA4D; SHOC2; SIGLEC5; SMPD1; SP100; SRP72; TNFRSF18; TOP2A; TSG101; XRCC6; FKBP9; MSH2; POLR1C; RBM47; SDE2; CD300C; CREM; ITIH4; JUP; PPP1R14A; SYTL4; TCN2; LDLRAD2; SPEG; HDAC4; MMP12; SMPDL3A; IDO1; CSF3; SL…
Hippocampus	109	7355	50.2304	1.24964	0.00165517	1	0.00888346	0.0349677	ATP2B4; ATRX; BICD2; CD226; CDK6; CHST11; CLEC1B; EFR3A; FBXO7; GIMAP8; GLRX; HDAC3; HEATR5B; IFNG; IL18; KIAA1033; LIF; LRPAP1; LRRC47; LTA; MMP8; NCKAP1; NUDCD1; NUP62; OSM; PFKFB3; PI4KA; PMVK; PNKP; PPP1R16B; RAB3D; RAC1; RECQL; RPS6KA1; SEMA3F; SEMA4D; SHOC2; SIGLEC5; SLC2A1; SMPD1; SP100; SRP72; TSG101; WDR4; XRCC6; FKBP9; MSH2; RBM47; SDE2; GZMB; CREM; ESYT2; ITIH4; NOTCH2; PPP1R14A; SYTL4…
Bronchus	103	6923	47.4654	1.25454	0.00225464	1	0.0117296	0.046171	ATP2B4; ATRX; BICD2; CD226; CDK6; CLEC1B; EFR3A; GIMAP8; GLRX; GORASP2; IFNG; IL18; IL2; LIF; LRPAP1; LRRC47; LTA; MMP8; NCKAP1; NUDCD1; NUP62; OSM; PMVK; PNKP; RAB3D; RAC1; RECQL; RPS6KA1; SEMA3F; SEMA4D; SHOC2; SLC2A1; SLC31A1; SMPD1; SP100; TOP2A; TSG101; XRCC6; ZFP36L1; FKBP9; MSH2; RBM47; SDE2; CREM; ESYT2; ITIH4; JUP; NAAA; PPP1R14A; SYTL4; TCN2; LDLRAD2; SPEG; HDAC4; C1QA; MMP12; SMPDL3A; …
Erythrocytes	30	1539	13.8249	1.64409	0.00475326	1	0.0226447	0.0891358	DOHH; FBXO7; GLRX; HNRNPH3; IL18; IPO11; LRRC47; NUDCD1; RAC1; RANGRF; RPS6KA1; SLC2A1; TNPO2; TSG101; TUBA1C; URM1; CCDC9; NCBP2; PPP2R5B; ARHGAP18; JUP; RRM1; PHGDH; BID; OXSR1; NPL; RBM3; MIF; FASN; SRM;
Smooth muscle cells	62	5124	28.5714	1.02036	0.451546	1	1	1	ATP2B4; ATRX; BICD2; CDK6; EFR3A; GIMAP8; GLRX; IFNG; IL18; IL2; LIF; LRPAP1; LRRC47; NUDCD1; NUP62; OSM; PFKFB3; PMVK; RAB3D; RAC1; RECQL; RPS6KA1; SEMA4D; SIGLEC5; SRP72; TSG101; XRCC6; MSH2; SDE2; CREM; ITIH4; PPP1R14A; TCN2; LDLRAD2; SPEG; HDAC4; GZMH; MMP12; SMPDL3A; IDO1; SLC29A1; PHGDH; TIMP2; FAM129B; SMARCC1; OXSR1; STAB1; PPP3R1; LIPG; CEP128; CTSA; HSPA13; LRP1; VPS13A; C3; GGH; NEU1; …
Thymocyte	1	48	0.460829	1.77374	0.436404	1	1	1	PPP3R1;
Heart	79	5507	36.4055	1.20967	0.026234	1	0.102048	0.401688	ACSL5; APPL2; ATP2B4; ATRX; BICD2; CHST11; EFR3A; FBXO7; FGFR1OP; GIMAP8; GORASP2; HDAC3; HEATR5B; HNRNPH3; IPO11; KIAA1033; LRRC47; NCKAP1; NUDCD1; PFKFB3; PI4KA; PMVK; PNKP; POLE3; RAB3D; RAC1; RANGRF; RECQL; RNMT; RPS6KA1; SEMA4D; SHOC2; SLC31A1; TSG101; WBSCR22; WDR4; XRCC6; DXO; MSH2; PPP2R5B; CREM; ESYT2; ITIH4; JUP; NAAA; NOTCH2; PPP1R14A; TCN2; CAMSAP3; LIMD1; SPEG; HDAC4; CST7; PHGDH; BI…
Amygdala	17	1204	7.8341	1.19117	0.262364	1	0.682469	1	BICD2; CHST11; FBXO7; HEATR5B; KIAA1033; LRRC47; NCKAP1; PI4KA; PPP1R16B; MSH2; IL2RA; ESYT2; CAMSAP3; SPEG; VPS13A; ST8SIA4; NDRG3;
Red blood cells	3	166	1.38249	1.52874	0.314753	1	0.780602	1	GLRX; SLC2A1; SLC29A1;
Thyroid gland	107	7306	49.3088	1.23494	0.00302436	1	0.0156382	0.0615561	ATP2B4; ATRX; BICD2; CDK6; CHST11; CLEC1B; EFR3A; F2RL3; FBXO7; FGFR1OP; GIMAP8; GLRX; GORASP2; HDAC3; IL18; IL2; LIF; LRPAP1; LRRC47; LTA; MMP8; NCKAP1; NUDCD1; NUP62; OSM; PFKFB3; PI4KA; PMVK; PNKP; RAB3D; RECQL; RNMT; RPS6KA1; SEMA4D; SIGLEC5; SLC2A1; SMPD1; SP100; SRP72; TNFRSF18; TOP2A; TSG101; XRCC6; ZFP36L1; FKBP9; LAT; MSH2; POLR1C; RBM47; SDE2; ESYT2; JUP; NAAA; PPP1R14A; HDAC4; C1QA; MM…
Heart muscle	90	6191	41.4747	1.22583	0.0109544	1	0.0482621	0.189973	ATP2B4; ATRX; BICD2; CD226; EFR3A; GIMAP8; GLRX; HDAC3; IFNG; LIF; LRPAP1; LRRC47; LTA; MMP8; NCKAP1; NUDCD1; NUP62; PFKFB3; PI4KA; PMVK; PNKP; RAC1; RECQL; RPS6KA1; SEMA4D; SIGLEC5; SLC31A1; SP100; SRP72; TSG101; XRCC6; FKBP9; MSH2; POLR1C; RBM47; SDE2; CD300C; CREM; ITIH4; JUP; NAAA; PPP1R14A; TCN2; LDLRAD2; SPEG; TGFBI; C1QA; SMPDL3A; CTSW; RRM1; IDO1; CSF3; SLC29A1; PHGDH; TIMP2; FAM129B; KRT…
Spinal cord	21	1465	9.67742	1.20917	0.211842	1	0.575776	1	APPL2; BICD2; CHST11; FBXO7; FGFR1OP; HEATR5B; KIAA1033; LRRC47; PPP1R16B; RAB3D; RPS6KA1; MSH2; IL2RA; ESYT2; CAMSAP3; SPEG; C1QB; B4GALT5; VPS13A; ST8SIA4; NDRG3;
Oesophagus	20	921	9.21659	1.83182	0.0067775	1	0.0307343	0.120979	ATRX; CDK6; GIMAP8; PRF1; RPS6KA1; SLC2A1; TOP2A; TSG101; XRCC6; JUP; HDAC4; C1QA; KRT18; KRT5; KRT1; PPP3R1; C3; IL1B; MIF; KRT10;
Huh7	51	2976	23.5023	1.44518	0.00349829	1	0.0174503	0.0686891	ARL6IP1; ATRX; CLN5; DOHH; EXOSC5; GIMAP8; GLRX; IL18; LRRC47; NUDCD1; NUP62; PFKFB3; SMPD1; SP100; SRP72; THOC2; TOP2A; TRMT1; TUBA1C; LAT; NUP85; POLR1C; PPP2R5B; LAG3; ARHGAP18; CREM; PPP1R14A; CAMSAP3; GCDH; TGFBI; C1QA; MRC1; RRM1; PHGDH; TIMP2; KRT79; SMARCC1; AOAH; CFD; B4GALT5; RNASE6; PLBD2; CTSA; NPM3; PSAT1; MCM4; LRP1; MIF; CTSD; CTSC; FASN;
Hair	19	817	8.75576	1.9618	0.00404113	1	0.0195822	0.0770808	ATP2B4; NCKAP1; RAC1; TUBA1C; JUP; PHGDH; FAM129B; KRT1; SLC1A5; GM2A; KRT8; GNS; TPP1; GGH; RBM3; MIF; CTSD; FASN; KRT10;
Uterus	16	917	7.37327	1.47203	0.0794927	1	0.269663	1	CHST11; F2RL3; GIMAP8; HNRNPH3; NUDCD1; PFKFB3; MSH2; BID; CTSS; LIPG; GM2A; NPL; NPM3; CTSH; THBS3; NDRG3;
Tracheobronchial cells	3	47	1.38249	5.39854	0.0181913	1	0.0738096	0.290535	TSG101; TUBA1C; MIF;
T24	6	123	2.76498	4.1194	0.003493	1	0.0174503	0.0686891	TUBA1C; TGFBI; GGH; TPT1; CTSD; HEXA;
Fetal hepatocytes	63	3784	29.0323	1.40397	0.00207723	1	0.0108734	0.0428006	ADPGK; ATP2B4; ATRX; CDK6; DOHH; EXOSC5; FGFR1OP; GLRX; GORASP2; GZMA; HDAC3; IL18; KIAA1033; LIF; LRRC47; M6PR; NUDCD1; PI4KA; PRF1; RANGRF; RECQL; SEMA3F; SEMA4D; SMPD1; SP100; SRP72; SRSF12; THOC2; TNFRSF18; TNPO2; TOP2A; TRMT1; DCK; LAT; MSH2; RBM47; CD300C; NOTCH2; GCDH; MRC1; RRM1; PHGDH; CCL5; SMARCC1; KRT1; CTSS; GM2A; SDS; GBP2; PLBD2; CTSA; NPM3; CFP; PSAT1; LRP1; GNS; SLC7A1; MIF; CTSD…
HH4	46	2684	21.1982	1.44533	0.00573107	1	0.0265571	0.104536	ARL6IP1; ATP2B4; ATRX; CLN5; EXOSC5; GLRX; LRRC47; M6PR; NCKAP1; NUDCD1; NUP62; PI4KA; THOC2; TOP2A; TUBA1C; DCK; MSH2; NUP85; SDE2; ARHGAP18; CD300C; NAAA; GCDH; LIMD1; HDAC4; MRC1; PHGDH; TIMP2; SMARCC1; OXSR1; KRT1; SLC1A5; GM2A; PLBD2; CTSA; PSAT1; MCM4; LRP1; GNS; LIPA; NEU1; MIF; CTSD; CTSC; FASN; SLC44A1;
Ramos	32	1566	14.7465	1.72342	0.0017008	1	0.00907095	0.0357057	ARL6IP1; CDK6; HEATR5B; IPO11; LRRC47; NUDCD1; PAF1; PI4KA; RNMT; RPS6KA1; SLC2A1; ZNF706; CLUH; DCK; NCBP2; NUP85; JUP; GCDH; RRM1; PHGDH; BID; ASNS; SLC1A5; GM2A; NPM3; MCM4; NUB1; RBM3; MIF; CTSD; FYN; FASN;
Aorta	14	530	6.45161	2.22871	0.00445215	1	0.0213301	0.0839609	CHST11; CLN5; FBXO7; PPP1R16B; CXCL10; MSH2; PPP1R14A; PHGDH; HPSE; LRP1; C3; CTSD; KRT10; NDRG3;
hupo46_reference_cam	20	1042	9.21659	1.61911	0.023263	1	0.0921824	0.362855	ADPGK; ARL6IP1; ATP2B4; PRPSAP1; RAC1; SLC2A1; TNPO2; TUBA1C; PPP1R14A; GFAP; C1QB; C1QA; SLC29A1; PHGDH; C4BPA; RALB; CFP; MIF; FYN; FASN;
Substantia nigra	17	1146	7.8341	1.25146	0.20218	1	0.554849	1	BICD2; CHST11; FBXO7; HEATR5B; KIAA1033; LRRC47; NCKAP1; PI4KA; PPP1R16B; MSH2; ESYT2; CAMSAP3; SPEG; CTSA; VPS13A; ST8SIA4; NDRG3;
Vagina	84	5307	38.7097	1.33469	0.00125939	1	0.00693482	0.0272973	ATP2B4; ATRX; BICD2; CDK6; CLEC1B; GIMAP8; GLRX; GORASP2; IL18; IL2; LIF; LRPAP1; LRRC47; MMP8; NCKAP1; NUP62; OSM; PFKFB3; PMVK; PNKP; PRF1; RAB3D; RECQL; RPS6KA1; SEMA3F; SEMA4D; SHOC2; SLC2A1; SLC31A1; SMPD1; SP100; SRP72; TNFRSF18; TOP2A; TSG101; XRCC6; ZFP36L1; FKBP9; POLR1C; SDE2; ITIH4; JUP; SYTL4; HDAC4; C1QA; SMPDL3A; RRM1; IDO1; SLC29A1; KRT18; PHGDH; TIMP2; FAM129B; KRT5; KRT75; SMARCC…
MDA-MB-468	16	770	7.37327	1.75305	0.0214275	1	0.0857099	0.337377	HNRNPH3; NUP62; RAC1; TUBA1C; XRCC6; MSH2; KRT18; PHGDH; KRT5; BID; KRT1; KRT8; PSAT1; TPT1; FASN; KRT10;
Esophagus	91	6034	41.9355	1.2717	0.00339518	1	0.0171376	0.0674582	ATP2B4; ATRX; BICD2; CDK6; CLEC1B; EFR3A; GIMAP8; GLRX; IL18; IL2; LIF; LRPAP1; LRRC47; LTA; MMP8; NCKAP1; NUP62; OSM; PFKFB3; PMVK; PNKP; PRF1; RAB3D; RECQL; RPS6KA1; SEMA3F; SEMA4D; SHOC2; SIGLEC5; SLC2A1; SLC31A1; SMPD1; SP100; SRP72; TNFRSF18; TOP2A; TSG101; XRCC6; FKBP9; POLR1C; SDE2; CD300C; ITIH4; JUP; LDLRAD2; SPEG; HDAC4; C1QA; SMPDL3A; RRM1; IDO1; CSF3; SLC29A1; KRT18; PHGDH; TIMP2; FAM…
Corpus callosum	15	988	6.91244	1.28091	0.196308	1	0.545801	1	BICD2; FBXO7; HEATR5B; KIAA1033; LRRC47; NCKAP1; PI4KA; PPP1R16B; IL2RA; ESYT2; CAMSAP3; SPEG; GFAP; VPS13A; NDRG3;
Mammary gland	13	760	5.99078	1.44331	0.11925	1	0.370416	1	LIF; NUDCD1; PFKFB3; XRCC6; MSH2; TGFBI; KRT18; GM2A; KRT8; LIPA; CTSD; FASN; NDRG3;
Tears	11	510	5.06912	1.82016	0.0413185	1	0.154353	0.607574	GLRX; MMP8; TUBA1C; ITIH4; JUP; TCN2; ANG; NEU1; MIF; CTSD; FASN;
Cellzome_Abl_inhibitors_NatureBiotechnology_exp144	3	186	1.38249	1.36437	0.379471	1	0.910248	1	PAF1; RPS6KA1; MIF;
hupo1_b1-hep_cam	4	80	1.84332	4.22572	0.0150963	1	0.0624589	0.245855	KRT1; C4BPA; C3; KRT10;
Subthalamic nucleus	11	882	5.06912	1.05248	0.476076	1	1	1	BICD2; HEATR5B; KIAA1033; LRRC47; PPP1R16B; IL2RA; ESYT2; CAMSAP3; SPEG; VPS13A; ST8SIA4;
Dentin	3	246	1.38249	1.03161	0.560761	1	1	1	TUBA1C; TGFBI; LRP1;
J82	5	216	2.30415	1.95553	0.114835	1	0.360668	1	FAM129B; PSAT1; RBM3; TPT1; MIF;
Ubiquitous	17	1052	7.8341	1.36328	0.121295	1	0.375396	1	ATRX; CLN5; FGFR1OP; GORASP2; PFKFB3; RAC1; SLC31A1; SP100; TSG101; WBSCR22; DXO; SMARCC1; RALB; PLBD2; GGH; TPT1; CTSD;
Cortex	13	683	5.99078	1.60602	0.0638594	1	0.220133	0.866504	ATP2B4; RAB3D; RAC1; SLC2A1; TUBA1C; GFAP; PHGDH; KRT1; RALB; PSAT1; TPP1; MIF; CTSD;
N06cs122	4	123	1.84332	2.74855	0.0588417	1	0.203664	0.801679	HNRNPH3; KRT5; KRT8; FYN;
Ileum	2	201	0.921659	0.843099	0.691508	1	1	1	GIMAP8; MSH2;
N06CS98-2	3	165	1.38249	1.538	0.311511	1	0.776944	1	TSG101; KRT8; FYN;
MV4-11	9	382	4.14747	1.98861	0.0390009	1	0.147646	0.581176	CDK6; PI4KA; RPS6KA1; TUBA1C; DCK; GCDH; PHGDH; MIF; FYN;
Caudate nucleus	17	1204	7.8341	1.19117	0.262364	1	0.682469	1	BICD2; CHST11; FBXO7; HEATR5B; KIAA1033; LRRC47; NCKAP1; PI4KA; PPP1R16B; MSH2; IL2RA; ESYT2; CAMSAP3; SPEG; VPS13A; ST8SIA4; NDRG3;
Retina	6	364	2.76498	1.39207	0.264302	1	0.685407	1	GLRX; TSPAN5; IDO1; TIMP2; LRP1; THBS3;
Medulla oblongata	8	473	3.68664	1.42778	0.200842	1	0.552967	1	APPL2; CHST11; FBXO7; RAB3D; MSH2; VPS13A; ST8SIA4; NDRG3;
A549	20	997	9.21659	1.69219	0.0152364	1	0.0624589	0.245855	NUDCD1; NUP62; POLE3; RAB3D; XRCC6; CLUH; NCBP2; POLR1C; RBM47; MRC1; RRM1; KRT18; SMARCC1; KRT8; MCM4; VPS13A; RBM3; MIF; FASN; SRM;
Temporal cortex	1	51	0.460829	1.66942	0.456272	1	1	1	C3;
Keratinocytes	9	250	4.14747	3.03856	0.00305758	1	0.0157064	0.0618245	NUP62; CXCL10; CCL5; KRT75; KRT1; CTSS; PPP3R1; LIPG; MIF;
Fetus	42	2992	19.3548	1.18383	0.134151	1	0.407741	1	ATP2B4; ATRX; BICD2; CHST11; CLN5; FBXO7; GIMAP8; HDAC3; HEATR5B; LRRC47; PFKFB3; PI4KA; PPP1R16B; RAB3D; SIGLEC5; TSPAN5; WBSCR22; WDR4; MSH2; PPP2R5B; PRICKLE2; ICOS; IL2RA; ESYT2; NOTCH2; CAMSAP3; SPEG; CSF3; KRT18; TIMP2; OXSR1; STAB1; CTSS; B4GALT5; GBP2; VPS13A; CTSH; ST8SIA4; NUB1; MIF; FASN; NDRG3;
MCF7	11	317	5.06912	2.92829	0.00146798	1	0.0079798	0.0314107	TUBA1C; KRT18; SLC1A5; KRT8; CTSA; GGH; TPT1; MIF; CTSD; HEXA; FASN;
Corneal epithelial cells	1	28	0.460829	3.04025	0.284168	1	0.72148	1	GLRX;
Ovarian follicle	1	18	0.460829	4.72833	0.193341	1	0.539319	1	CSF3;
Macrophages	9	274	4.14747	2.77242	0.0055497	1	0.0258579	0.101784	LIF; CXCL10; MRC1; IDO1; CFD; LIPG; LRP1; IL1B; CTSC;
Muscle	14	904	6.45161	1.30667	0.187234	1	0.531017	1	FGFR1OP; PFKFB3; POLE3; SUCLG1; DCK; HDAC4; PHGDH; LIPG; GM2A; NPM3; GLA; CTSC; THBS3; LRP5;
Hypothalamus	1	147	0.460829	0.579262	0.82811	1	1	1	NCKAP1;
Ventricles	2	151	0.921659	1.12225	0.536812	1	1	1	GIMAP8; NDRG3;
Thalamus	16	1141	7.37327	1.18305	0.279775	1	0.718938	1	BICD2; CHST11; FBXO7; GLRX; KIAA1033; LRRC47; NCKAP1; PI4KA; PPP1R16B; MSH2; ESYT2; CAMSAP3; SPEG; VPS13A; ST8SIA4; NDRG3;
Putamen	9	527	4.14747	1.44147	0.175574	1	0.510794	1	APPL2; CHST11; FBXO7; RAB3D; RPS6KA1; MSH2; VPS13A; ST8SIA4; NDRG3;
PT45	11	361	5.06912	2.57139	0.00399635	1	0.0194764	0.0766646	TGFBI; TIMP2; HSPA13; GNS; ANG; TPP1; GGH; TPT1; CTSD; CTSC; HEXA;
Jejunum	1	194	0.460829	0.438932	0.902406	1	1	1	GIMAP8;
ARPE-19	11	330	5.06912	2.81294	0.00201358	1	0.010672	0.0420077	M6PR; SLC2A1; KRT18; KRT1; KRT8; GNS; GGH; RBM3; CTSD; HEXA; KRT10;
Temporal lobe	10	477	4.60829	1.76932	0.0587042	1	0.203664	0.801679	APPL2; CHST11; FBXO7; RAB3D; RPS6KA1; MSH2; VPS13A; C3; ST8SIA4; NDRG3;
Lacrimal glands	11	453	5.06912	2.04918	0.0196655	1	0.0790347	0.311102	GLRX; MMP8; TUBA1C; ITIH4; JUP; TCN2; ANG; NEU1; MIF; CTSD; FASN;
hupo1_b1-edta_cam	1	42	0.460829	2.02707	0.394474	1	0.934396	1	C4BPA;
Cervix	1	104	0.460829	0.818741	0.711865	1	1	1	KRT8;
Epidermis	4	95	1.84332	3.55857	0.0265261	1	0.102713	0.404307	CXCL10; KRT5; PPP3R1; MIF;
Colostrum	1	8	0.460829	10.6314	0.0910493	1	0.299263	1	CXCL10;
Embryo	2	104	0.921659	1.62938	0.350145	1	0.853227	1	ATRX; CLN5;
Thymus	7	456	3.22581	1.29612	0.297828	1	0.75166	1	FGFR1OP; PI4KA; SIGLEC5; MSH2; CST7; VPS13A; CTSC;
Vermiform appendix	7	286	3.22581	2.06651	0.0547197	1	0.196909	0.775086	CHST11; GIMAP8; HDAC3; RAB3D; SIGLEC5; MSH2; FASN;
Mast cells	3	62	1.38249	4.09266	0.0373219	1	0.142563	0.561167	CCL5; FASN; SLC44A1;
Bone	2	112	0.921659	1.513	0.384203	1	0.917759	1	CTSS; CTSC;
Trachea	8	612	3.68664	1.10351	0.440549	1	1	1	CHST11; F2RL3; FGFR1OP; GIMAP8; MSH2; BID; B4GALT5; NDRG3;
Astrocytes	2	58	0.921659	2.92142	0.15077	1	0.448607	1	LRP1; FASN;
050603_BALF11	19	1019	8.75576	1.57291	0.0343499	1	0.132403	0.521176	ADPGK; POLE3; RECQL; SLC2A1; TOP2A; TUBA1C; C1QB; RRM1; SLC29A1; KRT1; ASNS; RALB; NPM3; KRT77; IL1B; FYN; FASN; KRT10; SRM;
HCC78	5	249	2.30415	1.69637	0.174675	1	0.510773	1	JUP; KRT18; KRT8; RBM3; FYN;
RBC	4	267	1.84332	1.26624	0.390506	1	0.930195	1	ATP2B4; RAC1; SLC2A1; TUBA1C;
T-lymphocytes	1	18	0.460829	4.72833	0.193341	1	0.539319	1	IFNG;
Hepatocytes	2	73	0.921659	2.32121	0.214614	1	0.579595	1	LIPG; FASN;
Nervous system	3	212	1.38249	1.19705	0.461385	1	1	1	GFAP; C1QB; FYN;
Transverse colon	2	48	0.921659	3.52992	0.110867	1	0.353439	1	GIMAP8; NDRG3;
Occipital lobe	6	359	2.76498	1.41146	0.254344	1	0.667752	1	APPL2; CHST11; FBXO7; RAB3D; MSH2; NDRG3;
N06CS97	6	270	2.76498	1.8767	0.102895	1	0.332969	1	JUP; KRT18; FAM129B; KRT5; KRT8; FYN;
Blood vessels	1	130	0.460829	0.655006	0.789132	1	1	1	C1QB;
NIBSC_glyco_qstar	1	60	0.460829	1.41905	0.51179	1	1	1	ITIH4;
Cartilage	3	89	1.38249	2.8512	0.0892445	1	0.29795	1	MMP8; SLC2A1; PRICKLE2;
Milk	2	47	0.921659	3.60501	0.107049	1	0.342556	1	CXCL10; CSF3;
MiaPaCa2	7	289	3.22581	2.04506	0.0572349	1	0.202882	0.798597	TGFBI; TIMP2; CTSH; GGH; TPT1; CTSD; HEXA;
Intestine	10	508	4.60829	1.66135	0.0814927	1	0.273145	1	HNRNPH3; MSH2; TCN2; HDAC4; GM2A; KRT8; CTSH; GLA; CTSC; LRP5;
Blood	7	227	3.22581	2.60359	0.0188684	1	0.0761923	0.299914	IL2; SIGLEC5; TOP2A; MSH2; GLA; ANG; NAGA;
Stem cell	5	138	2.30415	3.06075	0.0244324	1	0.0959196	0.377566	KRT1; KRT77; TPT1; CTSD; KRT10;
Pituitary gland	7	494	3.22581	1.19642	0.370538	1	0.897761	1	CHST11; FBXO7; LIF; MSH2; GM2A; THBS3; NDRG3;
BOBFreezeThaw	2	64	0.921659	2.64758	0.175886	1	0.510794	1	C1QA; C4BPA;
032403_BALF4_glypep	2	43	0.921659	3.94028	0.0921585	1	0.301739	1	MMP8; C1QA;
B cells	11	533	5.06912	1.74162	0.0535334	1	0.194001	0.763642	PI4KA; RAC1; SLC2A1; SLC29A1; PHGDH; RALB; SLC1A5; PSAT1; MIF; FASN; SLC44A1;
SH-SY5Y	9	537	4.14747	1.41463	0.189105	1	0.534536	1	POLE3; NCBP2; GCDH; PHGDH; NPM3; TPP1; MIF; CTSD; FASN;
Adrenal cortex	4	82	1.84332	4.12266	0.0163943	1	0.0668383	0.263094	RAB3D; CREM; LIPG; FASN;
Cytoskeleton	1	86	0.460829	0.990086	0.642439	1	1	1	SLC2A1;
Hematopoietic stem cells	7	200	3.22581	2.95506	0.00999882	1	0.0443927	0.174742	CDK6; OSM; TNFRSF4; TGFBI; CD69; KRT5; CTSC;
20_cys	3	96	1.38249	2.64332	0.105917	1	0.340219	1	KRT1; C4BPA; CFP;
hupo1_b1-cit_cam	3	71	1.38249	3.57394	0.0522554	1	0.190183	0.748612	C1QA; C4BPA; C3;
Panc1	5	346	2.30415	1.22081	0.391663	1	0.930336	1	XRCC6; TGFBI; GGH; TPT1; FASN;
Frontal lobe	9	480	4.14747	1.58261	0.118593	1	0.369774	1	APPL2; CHST11; FBXO7; RAB3D; RPS6KA1; MSH2; VPS13A; ST8SIA4; NDRG3;
Pons	3	134	1.38249	1.89378	0.212819	1	0.576583	1	FBXO7; CTSA; NDRG3;
Breast milk	3	73	1.38249	3.47604	0.0559109	1	0.199212	0.784152	FOLR1; MIF; FASN;
01_glyco	13	667	5.99078	1.64454	0.0550252	1	0.196909	0.775086	NUP62; TUBA1C; ITIH4; JUP; C1QA; PHGDH; KRT1; C4BPA; PLBD2; C3; CTSH; MIF; FASN;
Nucleus accumbens	4	166	1.84332	2.03662	0.135335	1	0.409873	1	CHST11; FBXO7; MSH2; NDRG3;
Bronchoalveolar fluid	4	186	1.84332	1.81764	0.18006	1	0.521129	1	CDK6; GLRX; IFNG; MIF;
Striatum	1	28	0.460829	3.04025	0.284168	1	0.72148	1	GLRX;
Bronchial epithelial cells	4	69	1.84332	4.89929	0.00912151	1	0.0407108	0.160249	PFKFB3; CSF3; CTSA; C3;
Kidney cancer	11	352	5.06912	2.63714	0.00330548	1	0.0167847	0.0660692	SLC2A1; MSH2; TGFBI; C1QB; KRT1; C4BPA; KRT8; LRP1; C3; TPT1; KRT10;
Umbilical vein endothelial cells	7	178	3.22581	3.32027	0.00541791	1	0.0253834	0.0999159	PPP1R16B; C1QB; C1QA; KRT1; CFP; C3; SLC44A1;
B lymphoblast	1	8	0.460829	10.6314	0.0910493	1	0.299263	1	DCK;
Eyes	5	122	2.30415	3.46212	0.0151805	1	0.0624589	0.245855	PRICKLE2; TGFBI; MMP12; LRP1; NUB1;
H2228	4	168	1.84332	2.01238	0.139584	1	0.421236	1	PI4KA; KRT18; RBM3; FYN;
Dentate nucleus	1	14	0.460829	6.07832	0.153877	1	0.453082	1	CTSA;
Bone marrow stromal cells	1	19	0.460829	4.4796	0.202917	1	0.555077	1	CSF3;
Granulocytes	5	89	2.30415	4.74569	0.00415183	1	0.0200043	0.0787423	CLEC1B; FGFR1OP; RAB3D; CD300C; CFP;
CD8 cell	1	45	0.460829	1.89196	0.415813	1	0.982199	1	CTSW;
Ventricular septum	2	82	0.921659	2.06647	0.254031	1	0.667752	1	GIMAP8; NDRG3;
Peripheral blood leukocytes	3	125	1.38249	2.03012	0.185537	1	0.52797	1	FGFR1OP; MSH2; CST7;
BJ635	3	175	1.38249	1.45012	0.343944	1	0.840531	1	TSG101; FYN; PIK3AP1;
Mesenchymal stromal cells	8	178	3.68664	3.79392	0.00131026	1	0.00716841	0.0282168	ATP2B4; SLC2A1; ESYT2; TGFBI; SLC1A5; LRP1; TPP1; SLC44A1;
Osteoblasts	1	52	0.460829	1.63733	0.462739	1	1	1	NOTCH2;
H1703	2	138	0.921659	1.22796	0.488798	1	1	1	RBM3; FYN;
T lymphocytes	1	32	0.460829	2.66033	0.31758	1	0.780602	1	CD27;
Cellzome_Abl_inhibitors_NatureBiotechnology_exp142	5	83	2.30415	5.08871	0.00307459	1	0.0157064	0.0618245	RPS6KA1; TUBA1C; DCK; MIF; FYN;
Adipose tissue	3	155	1.38249	1.63722	0.279185	1	0.718938	1	PRPSAP1; CFD; CTSS;
Occipital pole	3	129	1.38249	1.96718	0.197549	1	0.547456	1	RPS6KA1; VPS13A; ST8SIA4;
hupo55_b1-cit_cam	4	78	1.84332	4.33406	0.0138652	1	0.0582064	0.229116	PRPSAP1; KRT1; CFP; KRT10;
Tongue	1	54	0.460829	1.57669	0.475443	1	1	1	HNRNPH3;
Adrenal medulla	2	71	0.921659	2.38659	0.205927	1	0.5615	1	BID; LIPG;
Bowmann's capsule	1	7	0.460829	12.148	0.0801357	1	0.269663	1	MIF;
Gastrointestinal tract	1	23	0.460829	3.70088	0.240104	1	0.640277	1	LRP1;
Peripheral blood cells	5	140	2.30415	3.01703	0.0257959	1	0.100806	0.396801	LAT; CD300C; CST7; PLBD2; C3;
Syncytiotrophoblast	4	54	1.84332	6.25995	0.00382827	1	0.0187652	0.0738648	SLC2A1; IDO1; SLC1A5; LRP1;
Ascending colon	2	50	0.921659	3.38875	0.118607	1	0.369774	1	GIMAP8; NDRG3;
Neurons	1	68	0.460829	1.25213	0.556381	1	1	1	LRP1;
Zona glomerulosa	1	9	0.460829	9.45142	0.101834	1	0.330863	1	MIF;
Lymph	1	22	0.460829	3.86903	0.230972	1	0.619824	1	SIGLEC5;
Hematopoietic cells	1	22	0.460829	3.86903	0.230972	1	0.619824	1	FASN;
Melanoma cells	1	47	0.460829	1.81147	0.429622	1	1	1	KRT10;
Cornea	2	82	0.921659	2.06647	0.254031	1	0.667752	1	TGFBI; MIF;
Iris	2	14	0.921659	12.0965	0.0115996	1	0.0501861	0.197546	GLRX; CTSD;
Retinal pigmented epithelial cells	2	51	0.921659	3.32232	0.122526	1	0.376619	1	GLRX; CTSD;
18_size	5	104	2.30415	4.06128	0.00798008	1	0.0358048	0.140937	C1QB; C1QA; KRT1; KRT77; KRT10;
Decidua	4	43	1.84332	7.86095	0.00165313	1	0.00888346	0.0349677	IDO1; CSF3; MIF; FASN;
16_clinprot_c8	5	92	2.30415	4.59096	0.0047809	1	0.0226492	0.0891534	C1QA; KRT5; KRT1; C4BPA; KRT10;
Descending colon	2	56	0.921659	3.02573	0.142569	1	0.428717	1	GIMAP8; NDRG3;
Villus	1	10	0.460829	8.50722	0.112491	1	0.35462	1	ACSL5;
b1-SE_nonglyco_qstar	1	90	0.460829	0.946087	0.659181	1	1	1	C4BPA;
Eosinophils	1	100	0.460829	0.851488	0.6977	1	1	1	CD69;
Vascular endothelium	1	40	0.460829	2.1284	0.379818	1	0.910248	1	CFP;
Myocardium	1	30	0.460829	2.83763	0.301073	1	0.757155	1	CREM;
AdducinII	5	116	2.30415	3.64118	0.012428	1	0.0524327	0.206389	C1QB; C1QA; KRT1; C4BPA; CFP;
Granulosa lutein cells	1	28	0.460829	3.04025	0.284168	1	0.72148	1	LRP1;
Proximal convoluted tubule	1	32	0.460829	2.66033	0.31758	1	0.780602	1	C3;
Leydig cells	2	36	0.921659	4.70623	0.0678004	1	0.232772	0.916255	CTSA; LRP1;
Lung cancer cells	1	3	0.460829	28.2915	0.0351612	1	0.134917	0.531071	TSG101;
Cellzome_Abl_inhibitors_NatureBiotechnology_exp143	5	87	2.30415	4.85477	0.00376681	1	0.0185713	0.0731016	RPS6KA1; TUBA1C; DCK; MIF; FYN;
Gastric mucosa	1	33	0.460829	2.57974	0.325688	1	0.798217	1	DCK;
Skin fibroblasts	3	162	1.38249	1.56648	0.301791	1	0.757155	1	IDO1; CTSA; C3;
Alveolar macrophage	1	18	0.460829	4.72833	0.193341	1	0.539319	1	MMP12;
Urothelium	2	33	0.921659	5.13394	0.0581371	1	0.202882	0.798597	SMPDL3A; FASN;
Islets of Langerhans	5	135	2.30415	3.12876	0.0224756	1	0.0894804	0.352219	PFKFB3; PRICKLE2; KRT18; KRT8; KRT10;
Atrium	2	146	0.921659	1.16068	0.518713	1	1	1	GIMAP8; NDRG3;
Corpus luteum	1	12	0.460829	7.09053	0.13343	1	0.40701	1	LIPG;
Parietal lobe	2	111	0.921659	1.52663	0.379986	1	0.910248	1	FBXO7; NDRG3;
Sebaceous glands	1	29	0.460829	2.93545	0.29267	1	0.740849	1	FASN;
Large intestine	3	39	1.38249	6.50565	0.0109842	1	0.0482621	0.189973	RNMT; ST8SIA4; FASN;
Hair follicle	1	83	0.460829	1.02587	0.629348	1	1	1	KRT75;
Cytotrophoblasts	1	39	0.460829	2.18296	0.372359	1	0.899601	1	LRP1;
Lymphoblast	1	13	0.460829	6.54552	0.143714	1	0.429118	1	VPS13A;
Glomerulus	3	44	1.38249	5.76654	0.0152465	1	0.0624589	0.245855	PFKFB3; CFP; C3;
Mammary epithelium	4	75	1.84332	4.50739	0.0121416	1	0.0514802	0.20264	PFKFB3; JUP; LIPG; CTSD;
Dental cells	1	4	0.460829	21.2362	0.0466059	1	0.170353	0.670555	CSF3;
Karpas 299	1	24	0.460829	3.54674	0.249127	1	0.660188	1	KRT1;
B lymphocytes	2	27	0.921659	6.27439	0.0404645	1	0.151831	0.597649	CD27; CSF3;
Malignant pleural effusions	1	31	0.460829	2.74612	0.309375	1	0.773895	1	C1QB;
N06BJ504	1	78	0.460829	1.09162	0.606461	1	1	1	FYN;
Proximal tubular epithelium	1	8	0.460829	10.6314	0.0910493	1	0.299263	1	C3;
Vascular endothelial cells	3	63	1.38249	4.0277	0.0388561	1	0.147646	0.581176	PPP1R16B; LIPG; CFP;
Tooth	1	32	0.460829	2.66033	0.31758	1	0.780602	1	NOTCH2;
Dentate gyrus	1	26	0.460829	3.27402	0.266856	1	0.68992	1	GLRX;
Anterior pituitary	1	1	0.460829	84.3141	0.0118599	1	0.0505385	0.198933	FASN;
Chorion	1	14	0.460829	6.07832	0.153877	1	0.453082	1	IDO1;
T-lymphoblast	1	11	0.460829	7.73454	0.123023	1	0.376619	1	DCK;
Colon mucosa	2	46	0.921659	3.68336	0.103268	1	0.332969	1	DCK; CST7;
Seminiferous tubule	1	23	0.460829	3.70088	0.240104	1	0.640277	1	FASN;
Intestinal epithelial cells	2	27	0.921659	6.27439	0.0404645	1	0.151831	0.597649	KRT1; KRT10;
Reticulocytes	1	25	0.460829	3.40493	0.258044	1	0.675375	1	ASNS;
Pancreatic acinus	1	17	0.460829	5.00631	0.18365	1	0.524361	1	PFKFB3;
Coronary arteries	1	32	0.460829	2.66033	0.31758	1	0.780602	1	LIPG;
BOB2L_ISB	5	87	2.30415	4.85477	0.00376681	1	0.0185713	0.0731016	ITIH4; C1QA; KRT5; KRT1; KRT10;
Duodenum epithelium	1	7	0.460829	12.148	0.0801357	1	0.269663	1	FASN;
Zona fasciculata	2	11	0.921659	15.3925	0.00717653	1	0.0323707	0.12742	MIF; FASN;
Alveolus	1	14	0.460829	6.07832	0.153877	1	0.453082	1	PFKFB3;
Lung epithelium	1	9	0.460829	9.45142	0.101834	1	0.330863	1	KRT18;
Articular cartilage	1	17	0.460829	5.00631	0.18365	1	0.524361	1	SLC2A1;
Subthalamus	2	10	0.921659	16.9302	0.00591771	1	0.0271255	0.106773	NCKAP1; PI4KA;
Osteoclast	1	18	0.460829	4.72833	0.193341	1	0.539319	1	NUP85;
Cerebrum	3	30	1.38249	8.4567	0.00527511	1	0.0248516	0.0978227	RNMT; CTSA; C3;
Choriodecidua	1	10	0.460829	8.50722	0.112491	1	0.35462	1	LTA;
Nasal tissue epithelial cells	1	24	0.460829	3.54674	0.249127	1	0.660188	1	CCL5;
Medulla	1	5	0.460829	16.9975	0.0579155	1	0.202882	0.798597	RPS6KA1;
Basophils	1	28	0.460829	3.04025	0.284168	1	0.72148	1	CD69;
Midbrain	2	14	0.921659	12.0965	0.0115996	1	0.0501861	0.197546	GLRX; CTSA;
Dermal microvascular endothelial cells	2	14	0.921659	12.0965	0.0115996	1	0.0501861	0.197546	PPP1R16B; SLC44A1;
Amnion	1	16	0.460829	5.31901	0.173843	1	0.510101	1	LTA;
Colon epithelium	2	32	0.921659	5.29433	0.0550322	1	0.196909	0.775086	KRT18; MIF;
Intestinal mucosa	1	8	0.460829	10.6314	0.0910493	1	0.299263	1	ACSL5;
Cerebral neurons	1	7	0.460829	12.148	0.0801357	1	0.269663	1	FASN;
Renal tubular epithelium	2	10	0.921659	16.9302	0.00591771	1	0.0271255	0.106773	PFKFB3; MIF;
HUPO28_b1-CIT	1	37	0.460829	2.30093	0.35717	1	0.867852	1	ITIH4;
Pancreatic duct	1	17	0.460829	5.00631	0.18365	1	0.524361	1	PFKFB3;
Gingiva	1	11	0.460829	7.73454	0.123023	1	0.376619	1	CXCL10;
Lymphoid stem cell	1	17	0.460829	5.00631	0.18365	1	0.524361	1	LRP1;
Adenohypophysis	1	13	0.460829	6.54552	0.143714	1	0.429118	1	FASN;
Lactiferous ducts	1	4	0.460829	21.2362	0.0466059	1	0.170353	0.670555	FASN;
Precentral gyrus	1	5	0.460829	16.9975	0.0579155	1	0.202882	0.798597	NDRG3;
Conjunctiva	1	10	0.460829	8.50722	0.112491	1	0.35462	1	GLRX;
Vascular system	1	6	0.460829	14.1693	0.0690916	1	0.236249	0.929939	GUCY1B3;
Cervical mucus	1	5	0.460829	16.9975	0.0579155	1	0.202882	0.798597	IDO1;
Zona reticularis	1	4	0.460829	21.2362	0.0466059	1	0.170353	0.670555	MIF;
Mononuclear cell	1	4	0.460829	21.2362	0.0466059	1	0.170353	0.670555	CCL5;
Anagen follicle	1	2	0.460829	42.3668	0.0235797	1	0.0930028	0.366084	KRT75;
Lymphoid	1	4	0.460829	21.2362	0.0466059	1	0.170353	0.670555	LRP1;
Odontoclast	1	1	0.460829	84.3141	0.0118599	1	0.0505385	0.198933	CTSD;
Liver endothelium	1	1	0.460829	84.3141	0.0118599	1	0.0505385	0.198933	MRC1;

## Sheet: Transcription factor
Analysis: Transcription factor
Dataset name: BanLecsecretomep005
Number of genes in the dataset: 217
Number of genes in the dataset (which are available in Transcription factor database) :193
Number of genes in background: 15253
Is analysis quantitative: No
						Corrected p-values
Transcription factor	No. of genes in the dataset	No. of genes in the background dataset	Percentage of genes	Fold enrichment	P-value (Hypergeometric test)	Bonferroni method	BH method	Q-value (Storey-Tibshirani method)	genes mapped (from input data set)
ETS1	47	2496	24.3523	1.4884	0.00264129	0.554671	0.554671	1	ACSL5; APPL2; BICD2; EFR3A; F2RL3; FAM45A; IL18; IPO11; LIF; M6PR; PFKFB3; PNKP; PPP1R16B; PRF1; RAB3D; RAC1; RPS6KA1; SEMA4D; SHOC2; SIGLEC5; SP100; TSG101; TSPAN5; TUBA1C; CCDC9; LAT; SDE2; LAG3; ARHGAP18; ITIH4; JUP; NOTCH2; CTSW; CSF3; XCL2; KRT79; OLFM1; CTSA; PSAT1; ST8SIA4; SLC7A1; ANG; TPP1; CTSD; FYN; HEXA; LRP5;
MAFB	2	352	1.03627	0.45125	0.939734	1	1	1	CNOT10; SEMA4D;
NFIC	28	2040	14.5078	1.08507	0.351598	1	1	1	ATP2B4; CDK6; HEATR5B; LIF; PPP1R16B; RPS6KA1; SHOC2; TNFRSF4; URM1; CXCL10; IL2RA; ITIH4; NOTCH2; CD69; CSF3; SLC29A1; CCL5; KRT5; AOAH; CTSS; LRP1; CTSH; ST8SIA4; FYN; THBS3; MERTK; PIK3AP1; SLC44A1;
NR1H3	21	1020	10.8808	1.62779	0.0187985	1	0.79386	1	ADPGK; CLN5; HDAC3; RANGRF; RPS6KA1; SLC2A1; SUCLG1; THOC2; CCDC9; LAT; SYTL4; CAMSAP3; SPEG; HDAC4; TIMP2; LRP1; TPP1; CTSD; THBS3; MERTK; PIK3AP1;
PITX3	2	265	1.03627	0.59939	0.851896	1	1	1	ACSL5; RPS6KA1;
RXRA	18	1113	9.32642	1.27876	0.169255	1	1	1	ADPGK; CLN5; PPP1R16B; PRF1; RANGRF; RPS6KA1; SLC2A1; SUCLG1; THOC2; LAT; OLFML2B; SYTL4; SPEG; LRP1; TPP1; CTSD; MERTK; NAGA;
SOAT1	23	1261	11.9171	1.44203	0.0480248	1	0.79386	1	ADPGK; CLEC1B; EFR3A; IL18; NUDCD1; OSM; PAF1; SLC2A1; THOC2; ZFP36L1; CREM; ITIH4; SPEG; GFAP; SLC29A1; CCL5; SMARCC1; SLC1A5; KRT8; ANG; FYN; MERTK; LRP5;
STAT1	23	1261	11.9171	1.44203	0.0480248	1	0.79386	1	ADPGK; CLEC1B; EFR3A; IL18; NUDCD1; OSM; PAF1; SLC2A1; THOC2; ZFP36L1; CREM; ITIH4; SPEG; GFAP; SLC29A1; CCL5; SMARCC1; SLC1A5; KRT8; ANG; FYN; MERTK; LRP5;
DLX2	1	171	0.518135	0.466741	0.888063	1	1	1	NOTCH2;
DLX3	5	413	2.59067	0.958634	0.602301	1	1	1	FBXO7; ZFP36L1; NOTCH2; VPS13A; LRP5;
HNF1A	9	831	4.66321	0.856829	0.73078	1	1	1	CDK6; GORASP2; THOC2; RBM47; NOTCH2; FOLR1; AOAH; VPS13A; FYN;
HOXC9	6	573	3.10881	0.828873	0.736908	1	1	1	CD226; HEATR5B; IPO11; NCKAP1; CD320; NDRG3;
IRF1	16	811	8.29016	1.56006	0.0522569	1	0.79386	1	ACSL5; CD27; CDK6; CHST11; EFR3A; FBXO7; IL2; KIAA1033; OSM; CXCL10; FKBP9; HDAC4; IDO1; LIPA; KRT10; PIK3AP1;
LHX3	14	1210	7.25389	0.915008	0.675972	1	1	1	ACSL5; CLEC1B; CNOT10; GORASP2; NCKAP1; SRSF12; SUCLG1; THOC2; TUBA1C; C1QA; FOLR1; SMARCC1; ST8SIA4; FYN;
MEF2A	22	1835	11.399	0.947889	0.640114	1	1	1	APPL2; ARL6IP1; FAM45A; FBXO7; LIF; PPP1R16B; SUCLG1; THOC2; ZNF706; SDE2; SYTL4; SPEG; HDAC4; TIMP2; FAM129B; KRT5; AOAH; OLFM1; PPP3R1; VPS13A; FYN; SLC44A1;
NKX6-1	19	1408	9.84456	1.06697	0.419414	1	1	1	CD226; GORASP2; NCKAP1; PPP1R16B; SRP72; THOC2; URM1; ICOS; SPEG; HDAC4; PHGDH; TIMP2; SMARCC1; AOAH; CTSS; SLC7A1; GLA; FYN; LRP5;
OTX2	5	324	2.59067	1.22195	0.390923	1	1	1	ARL6IP1; CDK6; TSPAN5; TCN2; SLC7A1;
PHOX2A	1	442	0.518135	0.180578	0.996694	1	1	1	SYTL4;
POU2F1	21	2209	10.8808	0.75163	0.942006	1	1	1	ARL6IP1; CDK6; FBXO7; IPO11; SEMA4D; SHOC2; FKBP9; RBM47; SDE2; ARHGAP18; FOLR1; CSF3; AOAH; LIPG; CEP128; HPSE; VPS13A; IL1B; FYN; PIK3AP1; SRM;
POU3F2	4	789	2.07254	0.401641	0.991187	1	1	1	FAM45A; CREM; C1QA; FYN;
SRF	4	462	2.07254	0.685913	0.840414	1	1	1	JUP; SPEG; SLC7A1; FYN;
ARID3A	18	1250	9.32642	1.13861	0.318037	1	1	1	ATRX; CD226; CNOT10; GZMA; HDAC3; HEATR5B; IPO11; NCKAP1; SUCLG1; MSH2; NOTCH2; SYTL4; C1QA; AOAH; C4BPA; CFP; VPS13A; NCAPG2;
EHF	13	753	6.73575	1.36538	0.159189	1	1	1	ACSL5; APPL2; GORASP2; M6PR; RANGRF; RPS6KA1; SEMA4D; SHOC2; CD300C; JUP; KRT18; CTSS; RNASE6;
FOXA1	4	804	2.07254	0.394147	0.992398	1	1	1	RBM47; SLC7A1; LIPA; LRP5;
ATF1	9	1037	4.66321	0.686622	0.914729	1	1	1	ATP2B4; IPO11; PAF1; SLC31A1; DXO; CREM; ESYT2; OXSR1; THBS3;
CREB1	12	973	6.21762	0.975442	0.579281	1	1	1	OSM; PAF1; PMVK; RNMT; SLC31A1; DXO; GZMB; ESYT2; HDAC4; OXSR1; SCPEP1; TPT1;
JDP2	10	763	5.18135	1.03676	0.500832	1	1	1	CDK6; OSM; PAF1; SEMA4D; DXO; PPP2R5B; CREM; HDAC4; OXSR1; FYN;
NFYA	33	2544	17.0984	1.02542	0.467616	1	1	1	ATP2B4; CD226; CNOT10; M6PR; OSM; PAF1; RECQL; RPS6KA1; SLC2A1; TNPO2; TSPAN5; TUBA1C; WBSCR22; XRCC6; CXCL10; SPEG; HDAC4; LIPG; SLC1A5; SDS; CTSA; PSAT1; MCM4; GNS; C3; GLA; SCPEP1; LIPA; NEU1; FASN; GUCY1B3; PIK3AP1; SRM;
PLAU	9	1037	4.66321	0.686622	0.914729	1	1	1	ATP2B4; IPO11; PAF1; SLC31A1; DXO; CREM; ESYT2; OXSR1; THBS3;
RORA	15	1168	7.77202	1.01557	0.515265	1	1	1	ARL6IP1; CDK6; CLEC1B; EFR3A; PFKFB3; RECQL; SHOC2; SUCLG1; THOC2; ZFP36L1; SPEG; GFAP; SMARCC1; FYN; NDRG3;
YY1	7	1317	3.62694	0.420634	0.99823	1	1	1	DOHH; HNRNPH3; IPO11; RAC1; TRMT1; RRM1; NDRG3;
ELK1	25	1986	12.9534	0.995195	0.543715	1	1	1	ATP2B4; CDK6; HDAC3; KIAA1033; M6PR; PNKP; RAC1; RNMT; RPS6KA1; SEMA4D; SHOC2; TSG101; URM1; CCDC9; CREM; JUP; LIMD1; C1QB; AOAH; OLFM1; VPS13A; ST8SIA4; FYN; HEXA; KRT10;
GABPA	33	2702	17.0984	0.96546	0.618794	1	1	1	APPL2; BICD2; CNOT10; EXOSC5; FAM45A; FBXO7; GORASP2; HEATR5B; KIAA1033; M6PR; OSM; PFKFB3; PNKP; PRF1; RNMT; SHOC2; SLC31A1; TSG101; TUBA1C; URM1; CCDC9; DCK; DXO; RBM47; SDE2; LIMD1; HDAC4; XCL2; VPS13A; ST8SIA4; NEU1; TPT1; HEXA;
CTCF	29	2605	15.0259	0.880064	0.803339	1	1	1	ACSL5; ATP2B4; BICD2; CNOT10; FBXO7; GORASP2; PFKFB3; ZNF706; ARHGAP18; OLFML2B; PPP1R14A; SPEG; HDAC4; CSF3; SLC29A1; FAM129B; BID; CTSA; NPM3; MCM4; LRP1; C3; NEU1; TPT1; FYN; THBS3; MERTK; PIK3AP1; SRM;
FEV	7	526	3.62694	1.05317	0.500235	1	1	1	PPP1R16B; RAC1; LAT; CREM; KRT18; AOAH; IQCE;
HERPUD1	2	421	1.03627	0.377294	0.971482	1	1	1	ATP2B4; THBS3;
KLF7	68	4448	35.2332	1.20832	0.0385996	1	0.79386	1	ADPGK; BICD2; CNOT10; FAM45A; FGFR1OP; GORASP2; HDAC3; LRPAP1; OSM; PMVK; PNKP; PRF1; RECQL; RPS6KA1; SHOC2; SLC2A1; SLC31A1; SMPD1; SRP72; SRSF12; TNPO2; TSPAN5; TUBA1C; WBSCR22; XRCC6; ZNF706; CCDC9; DCK; PPP2R5B; SDE2; JUP; NOTCH2; SYTL4; CAMSAP3; LIMD1; SPEG; HDAC4; TGFBI; GFAP; CST7; SLC29A1; KRT18; TIMP2; FAM129B; KRT75; OLFM1; SLC1A5; B4GALT5; KRT8; NPM3; HSPA13; LRP1; GNS; VPS13A; C3; SLC…
MAF	8	466	4.14508	1.35835	0.238554	1	1	1	TUBA1C; FKBP9; TCN2; SPEG; KRT18; PHGDH; TIMP2; LRP1;
NANOG	3	204	1.5544	1.16598	0.478761	1	1	1	NCKAP1; RAC1; SPEG;
NR5A1	15	1129	7.77202	1.05065	0.461075	1	1	1	ADPGK; EXOSC5; PPP1R16B; RPS6KA1; SEMA4D; SLC31A1; THOC2; WBSCR22; FKBP9; SPEG; C1QA; FAM129B; SLC7A1; PIK3AP1; NDRG3;
RFX1	23	2158	11.9171	0.842634	0.84127	1	1	1	ATP2B4; ATRX; CNOT10; IPO11; RECQL; SRSF12; THOC2; DXO; POLR1C; SDE2; CREM; LDLRAD2; SPEG; HDAC4; SLC29A1; VPS13A; GLA; FASN; GUCY1B3; THBS3; NAGA; PIK3AP1; SLC44A1;
RREB1	32	2136	16.5803	1.18429	0.17427	1	1	1	ATP2B4; CDK6; CHST11; HNRNPH3; LIF; OSM; PRF1; RECQL; RPS6KA1; ZFP36L1; LAG3; JUP; NOTCH2; SPEG; CD69; CTSW; SLC29A1; FAM129B; KRT5; AOAH; OXSR1; CTSA; HSPA13; KRT77; C3; ST8SIA4; GLA; LIPA; TPP1; FYN; CD320; THBS3;
SF1	15	1129	7.77202	1.05065	0.461075	1	1	1	ADPGK; EXOSC5; PPP1R16B; RPS6KA1; SEMA4D; SLC31A1; THOC2; WBSCR22; FKBP9; SPEG; C1QA; FAM129B; SLC7A1; PIK3AP1; NDRG3;
SP1	95	7140	49.2228	1.05159	0.272879	1	1	1	ADPGK; APPL2; ARL6IP1; ATRX; CDK6; CHST11; CNOT10; EXOSC5; FAM45A; FGFR1OP; HDAC3; IPO11; KIAA1033; LIF; LRPAP1; NUDCD1; OSM; PMVK; PNKP; POLE3; PPP1R16B; PRF1; RAB3D; RPS6KA1; SHOC2; SLC2A1; SLC31A1; SMPD1; SRP72; SRSF12; TNPO2; TRMT1; TSPAN5; TUBA1C; WBSCR22; XRCC6; ZFP36L1; ZNF706; CCDC9; DCK; DXO; FKBP9; LAT; SDE2; LAG3; JUP; NOTCH2; OLFML2B; PPP1R14A; SYTL4; CAMSAP3; LIMD1; SPEG; HDAC4; CD69…
SP4	49	4345	25.3886	0.891394	0.851047	1	1	1	APPL2; ATRX; CDK6; FGFR1OP; HDAC3; IPO11; LRPAP1; NCKAP1; OSM; PAF1; PNKP; PPP1R16B; PRF1; RECQL; SLC31A1; SMPD1; WBSCR22; XRCC6; ZNF706; CCDC9; LAT; MSH2; LAG3; CAMSAP3; SPEG; CD69; KRT18; PHGDH; TIMP2; FAM129B; KRT75; OLFM1; CFD; SLC1A5; GM2A; CTSA; HSPA13; LRP1; GNS; VPS13A; C3; CTSH; ST8SIA4; TPT1; CTSD; FYN; CD320; GUCY1B3; NCAPG2;
TCF3	31	2140	16.0622	1.14515	0.233981	1	1	1	ACSL5; CNOT10; GORASP2; HDAC3; LIF; RANGRF; RPS6KA1; SEMA4D; TSG101; ZNF706; CCDC9; LAT; PPP2R5B; ITIH4; OLFML2B; SPEG; GFAP; C1QA; PHGDH; TIMP2; KRT79; LIPG; NPM3; LRP1; CTSH; SLC7A1; NEU1; CD320; GUCY1B3; PIK3AP1; LRP5;
OTX1	12	848	6.21762	1.11923	0.38731	1	1	1	ARL6IP1; CLEC1B; HEATR5B; IPO11; KIAA1033; NCKAP1; RECQL; MSH2; NOTCH2; PHGDH; AOAH; VPS13A;
PITX1	12	848	6.21762	1.11923	0.38731	1	1	1	ARL6IP1; CLEC1B; HEATR5B; IPO11; KIAA1033; NCKAP1; RECQL; MSH2; NOTCH2; PHGDH; AOAH; VPS13A;
E2F1	18	1188	9.32642	1.19803	0.245774	1	1	1	CDK6; FBXO7; HNRNPH3; IPO11; NCKAP1; PPP1R16B; SHOC2; THOC2; NOTCH2; SYTL4; GFAP; RRM1; SMARCC1; SLC1A5; MCM4; ANG; TPT1; CTSC;
EGR1	36	3215	18.6528	0.885149	0.82061	1	1	1	APPL2; CDK6; GLRX; HDAC3; IL2; KIAA1033; LIF; POLE3; PPP1R16B; RECQL; RPS6KA1; SHOC2; SLC31A1; THOC2; TNPO2; XRCC6; ZFP36L1; ZNF706; LAT; MSH2; IL2RA; NOTCH2; PPP1R14A; SPEG; GFAP; OLFM1; KRT8; NPM3; HSPA13; LRP1; C3; ST8SIA4; GLA; TPT1; FYN; GUCY1B3;
NKX2-1	10	711	5.18135	1.11259	0.412044	1	1	1	ACSL5; ARL6IP1; HNRNPH3; SRP72; ARHGAP18; NOTCH2; TIMP2; C4BPA; SLC7A1; CTSC;
NRF1	18	2037	9.32642	0.698709	0.966139	1	1	1	EXOSC5; FBXO7; HEATR5B; IPO11; OSM; XRCC6; DCK; HDAC4; SMPDL3A; SMARCC1; LRP1; VPS13A; LIPA; IQCE; CD320; FASN; NCAPG2; NDRG3;
BACH1	12	648	6.21762	1.46466	0.120714	1	1	1	EFR3A; LIF; LAT; ESYT2; GFAP; CSF3; TIMP2; KRT5; KRT8; NPL; LRP1; TPP1;
HOXB4	5	718	2.59067	0.551421	0.952676	1	1	1	CNOT10; HEATR5B; C1QA; AOAH; NCAPG2;
MEIS2	5	527	2.59067	0.751268	0.801198	1	1	1	KRT1; OLFM1; B4GALT5; CFP; VPS13A;
NR4A2	14	1042	7.25389	1.06253	0.448019	1	1	1	CDK6; CHST11; EXOSC5; GZMA; PPP1R16B; RANGRF; RECQL; SLC31A1; SMPD1; TSG101; WBSCR22; SPEG; ANG; NDRG3;
PPARA	6	370	3.10881	1.28362	0.327304	1	1	1	LIF; SRP72; URM1; SPEG; HDAC4; KRT5;
PPARG	28	2016	14.5078	1.09798	0.327574	1	1	1	ADPGK; ARL6IP1; HDAC3; LIF; PNKP; RANGRF; RPS6KA1; SEMA4D; SLC2A1; SLC31A1; SRP72; THOC2; URM1; LAT; LAG3; ITIH4; SYTL4; SPEG; KRT5; KRT79; LRP1; C3; IL1B; SLC7A1; ANG; TPP1; CTSD; MERTK;
HSF1	12	806	6.21762	1.17755	0.322781	1	1	1	SEMA4D; ZFP36L1; ARHGAP18; CREM; JUP; MRC1; KRT18; FAM129B; LRP1; VPS13A; FYN; PIK3AP1;
ETV7	19	1049	9.84456	1.43212	0.0726296	1	1	1	ACSL5; APPL2; BICD2; CNOT10; F2RL3; FAM45A; IPO11; PRF1; RNMT; RPS6KA1; SEMA4D; SHOC2; ZNF706; CCDC9; ARHGAP18; CTSW; CTSS; RNASE6; ANG;
NR5A2	5	486	2.59067	0.814645	0.740608	1	1	1	APPL2; CLEC1B; FAM45A; WBSCR22; FKBP9;
TEAD1	6	422	3.10881	1.12545	0.44459	1	1	1	CDK6; NOTCH2; SPEG; GFAP; NPM3; THBS3;
TFAP2A	2	258	1.03627	0.615652	0.841215	1	1	1	GFAP; LRP1;
ARNT	3	403	1.5544	0.590237	0.888269	1	1	1	KIAA1033; SLC29A1; GLA;
BARX1	5	382	2.59067	1.03643	0.532689	1	1	1	GORASP2; HEATR5B; MMP8; KRT10; SRM;
BSX	4	268	2.07254	1.18241	0.440971	1	1	1	HEATR5B; XRCC6; KRT8; FYN;
DMBX1	5	368	2.59067	1.07586	0.499552	1	1	1	ARL6IP1; SP100; TNPO2; NOTCH2; SLC7A1;
GSC	3	379	1.5544	0.627612	0.862035	1	1	1	ATRX; FYN; SLC44A1;
HNF4A	40	3015	20.7254	1.04871	0.396529	1	1	1	ACSL5; ADPGK; ARL6IP1; CDK6; CLEC1B; CNOT10; DOHH; GORASP2; GZMA; IL18; NUDCD1; RAB3D; RPS6KA1; SLC2A1; SUCLG1; URM1; XRCC6; ZNF706; LAT; ICOS; ARHGAP18; SPEG; TGFBI; SLC29A1; PHGDH; KRT5; SMARCC1; OXSR1; B4GALT5; PSAT1; LRP1; VPS13A; SLC7A1; GLA; ANG; TPP1; CTSD; IQCE; FYN; CD320;
HOXA3	5	573	2.59067	0.690957	0.855362	1	1	1	CDK6; GORASP2; ARHGAP18; CAMSAP3; SRM;
HOXB3	2	335	1.03627	0.474148	0.927846	1	1	1	ZFP36L1; FYN;
HOXD8	4	811	2.07254	0.390745	0.992907	1	1	1	CDK6; THOC2; AOAH; FYN;
ONECUT1	4	564	2.07254	0.561867	0.930003	1	1	1	GORASP2; HEATR5B; RAC1; SEMA4D;
PAX7	5	467	2.59067	0.847788	0.70835	1	1	1	SRSF12; NOTCH2; CD69; VPS13A; FYN;
POU4F3	8	687	4.14508	0.921394	0.645143	1	1	1	EFR3A; NCKAP1; PPP1R16B; PHGDH; AOAH; VPS13A; FYN; KRT10;
PRRX2	6	597	3.10881	0.795552	0.771618	1	1	1	ACSL5; CNOT10; HEATR5B; IL18; THOC2; GNS;
VAX2	3	434	1.5544	0.548078	0.915547	1	1	1	SYTL4; VPS13A; LIPA;
VSX2	4	595	2.07254	0.532593	0.946398	1	1	1	ATRX; RAC1; CREM; SRM;
CUX1	5	350	2.59067	1.13118	0.455748	1	1	1	FBXO7; SP100; TSPAN5; SLC7A1; GLA;
CACD	10	514	5.18135	1.539	0.117869	1	1	1	IPO11; OSM; RAC1; RECQL; JUP; CAMSAP3; SLC29A1; OXSR1; C3; THBS3;
HOXB13	4	526	2.07254	0.602457	0.903869	1	1	1	IPO11; CREM; VPS13A; FYN;
ZNF238	6	799	3.10881	0.594426	0.942874	1	1	1	CHST11; RPS6KA1; JUP; SLC29A1; VPS13A; ANG;
ZNF513	6	799	3.10881	0.594426	0.942874	1	1	1	CHST11; RPS6KA1; JUP; SLC29A1; VPS13A; ANG;
MYC	16	1086	8.29016	1.16502	0.299843	1	1	1	DOHH; EXOSC5; IPO11; OSM; PFKFB3; SLC2A1; TNPO2; TUBA1C; HDAC4; SLC29A1; PLBD2; CTSA; GNS; CD320; HEXA; PIK3AP1;
MYF5	29	1856	15.0259	1.23522	0.134207	1	1	1	ACSL5; BICD2; CNOT10; GORASP2; LIF; PPP1R16B; PRF1; RPS6KA1; SEMA4D; SRP72; CCDC9; GZMB; ARHGAP18; OLFML2B; TCN2; CAMSAP3; HDAC4; C1QA; SLC29A1; LIPG; KRT8; GNS; SLC7A1; TPP1; THBS3; PIK3AP1; NCAPG2; LRP5; SLC44A1;
FOXD1	5	334	2.59067	1.18537	0.415996	1	1	1	RAB3D; SLC31A1; ICOS; ST8SIA4; LIPA;
POU6F1	8	655	4.14508	0.966408	0.591339	1	1	1	IPO11; THOC2; TSPAN5; CD69; LIPG; VPS13A; FYN; KRT10;
ASCL2	19	1499	9.84456	1.0022	0.53266	1	1	1	CDK6; LIF; PPP1R16B; SLC2A1; TNPO2; FKBP9; PPP2R5B; NOTCH2; SPEG; C1QB; C1QA; SLC29A1; FAM129B; NPM3; PSAT1; LIPA; IQCE; FYN; THBS3;
BARHL1	8	509	4.14508	1.2436	0.316593	1	1	1	HEATR5B; THOC2; XRCC6; ARHGAP18; SPEG; HDAC4; KRT75; FYN;
ESRRA	15	917	7.77202	1.29355	0.185644	1	1	1	ARL6IP1; ATRX; PNKP; SHOC2; THOC2; TSG101; FKBP9; ARHGAP18; NOTCH2; SPEG; SMPDL3A; KRT5; CTSA; SLC7A1; FYN;
GBX1	2	199	1.03627	0.798173	0.720349	1	1	1	CDK6; LRP5;
GBX2	2	302	1.03627	0.525957	0.89824	1	1	1	CDK6; FAM45A;
LHX4	4	392	2.07254	0.808394	0.734731	1	1	1	FAM45A; NCKAP1; HDAC4; FYN;
TCF12	14	1099	7.25389	1.00742	0.529767	1	1	1	ACSL5; IL2; LIF; RAB3D; RPS6KA1; TNPO2; PPP2R5B; LIMD1; SPEG; KRT5; KRT1; PSAT1; THBS3; NAGA;
ELF2	13	780	6.73575	1.31811	0.189722	1	1	1	APPL2; BICD2; PFKFB3; PRF1; RPS6KA1; SHOC2; SUCLG1; TNFRSF18; LAT; ICOS; CTSW; LRP1; FYN;
ESR1	13	696	6.73575	1.47719	0.104143	1	1	1	ACSL5; BICD2; NCKAP1; RPS6KA1; ICOS; ARHGAP18; CD300C; SPEG; GFAP; CCL5; LRP1; VPS13A; CTSD;
FOS	30	1754	15.544	1.3521	0.052924	1	0.79386	1	CD226; EFR3A; GLRX; HDAC3; LIF; PFKFB3; PMVK; RAB3D; RAC1; RPS6KA1; SLC31A1; TUBA1C; LAT; GZMB; ARHGAP18; ITIH4; JUP; CAMSAP3; GFAP; CSF3; KRT18; TIMP2; FAM129B; KRT5; KRT79; PPP3R1; KRT8; NPL; PLBD2; KRT10;
FOSB	30	1754	15.544	1.3521	0.052924	1	0.79386	1	CD226; EFR3A; GLRX; HDAC3; LIF; PFKFB3; PMVK; RAB3D; RAC1; RPS6KA1; SLC31A1; TUBA1C; LAT; GZMB; ARHGAP18; ITIH4; JUP; CAMSAP3; GFAP; CSF3; KRT18; TIMP2; FAM129B; KRT5; KRT79; PPP3R1; KRT8; NPL; PLBD2; KRT10;
JUN	30	1754	15.544	1.3521	0.052924	1	0.79386	1	CD226; EFR3A; GLRX; HDAC3; LIF; PFKFB3; PMVK; RAB3D; RAC1; RPS6KA1; SLC31A1; TUBA1C; LAT; GZMB; ARHGAP18; ITIH4; JUP; CAMSAP3; GFAP; CSF3; KRT18; TIMP2; FAM129B; KRT5; KRT79; PPP3R1; KRT8; NPL; PLBD2; KRT10;
JUNB	30	1754	15.544	1.3521	0.052924	1	0.79386	1	CD226; EFR3A; GLRX; HDAC3; LIF; PFKFB3; PMVK; RAB3D; RAC1; RPS6KA1; SLC31A1; TUBA1C; LAT; GZMB; ARHGAP18; ITIH4; JUP; CAMSAP3; GFAP; CSF3; KRT18; TIMP2; FAM129B; KRT5; KRT79; PPP3R1; KRT8; NPL; PLBD2; KRT10;
JUND	30	1754	15.544	1.3521	0.052924	1	0.79386	1	CD226; EFR3A; GLRX; HDAC3; LIF; PFKFB3; PMVK; RAB3D; RAC1; RPS6KA1; SLC31A1; TUBA1C; LAT; GZMB; ARHGAP18; ITIH4; JUP; CAMSAP3; GFAP; CSF3; KRT18; TIMP2; FAM129B; KRT5; KRT79; PPP3R1; KRT8; NPL; PLBD2; KRT10;
NR6A1	10	769	5.18135	1.02867	0.510905	1	1	1	CDK6; FAM45A; HDAC3; NUDCD1; RECQL; RPS6KA1; SDE2; IL2RA; ARHGAP18; NOTCH2;
RAB40B	10	806	5.18135	0.981453	0.571567	1	1	1	ADPGK; PPP1R16B; RANGRF; RPS6KA1; LAT; RBM47; ZNF662; PHGDH; LIPA; ANG;
RARA	10	806	5.18135	0.981453	0.571567	1	1	1	ADPGK; PPP1R16B; RANGRF; RPS6KA1; LAT; RBM47; ZNF662; PHGDH; LIPA; ANG;
SPI1	15	814	7.77202	1.45723	0.0927209	1	1	1	ARL6IP1; M6PR; NCKAP1; RANGRF; RPS6KA1; SIGLEC5; TSG101; DCK; FKBP9; RBM47; C1QB; C1QA; CTSS; GM2A; CTSA;
BARX2	1	296	0.518135	0.269644	0.977773	1	1	1	KRT10;
DBX2	1	408	0.518135	0.195626	0.994838	1	1	1	AOAH;
EN1	2	466	1.03627	0.34086	0.982719	1	1	1	CNOT10; LRP5;
FOXC1	2	301	1.03627	0.527705	0.897188	1	1	1	CDK6; AOAH;
HOXA5	12	916	6.21762	1.03614	0.493406	1	1	1	CDK6; FGFR1OP; SRP72; THOC2; XRCC6; ZNF706; NOTCH2; SMARCC1; ANG; FYN; KRT10; SRM;
HOXA7	6	527	3.10881	0.901221	0.660514	1	1	1	CNOT10; KIAA1033; THOC2; MSH2; GZMH; FYN;
HOXB6	1	123	0.518135	0.648869	0.792499	1	1	1	SRM;
HOXB7	1	388	0.518135	0.205709	0.993295	1	1	1	SYTL4;
HOXC6	1	237	0.518135	0.336768	0.952246	1	1	1	CDK6;
ISX	4	265	2.07254	1.1958	0.432516	1	1	1	SUCLG1; JUP; FYN; MERTK;
LHX8	1	223	0.518135	0.357909	0.94277	1	1	1	LRP5;
MNX1	1	311	0.518135	0.256639	0.981709	1	1	1	CFP;
NKX1-1	1	146	0.518135	0.546657	0.845585	1	1	1	NOTCH2;
PAX6	3	557	1.5544	0.427051	0.974046	1	1	1	OSM; SRSF12; CTSS;
PBX1	6	741	3.10881	0.640953	0.912179	1	1	1	CD226; GZMA; LIF; SP100; THOC2; OXSR1;
POU5F1	2	373	1.03627	0.425845	0.951872	1	1	1	SEMA4D; AOAH;
PRRX1	2	389	1.03627	0.40833	0.95952	1	1	1	THOC2; FOLR1;
REST	4	765	2.07254	0.414241	0.988859	1	1	1	ACSL5; JUP; OLFM1; SRM;
SOX1	5	276	2.59067	1.43446	0.271577	1	1	1	PPP1R16B; SHOC2; RBM47; ARHGAP18; ST8SIA4;
TGIF1	13	1034	6.73575	0.994325	0.55095	1	1	1	CNOT10; HNRNPH3; PRF1; MSH2; ESYT2; NOTCH2; CAMSAP3; SLC29A1; KRT1; CFP; VPS13A; PIK3AP1; LRP5;
CRX	2	349	1.03627	0.455128	0.93778	1	1	1	KRT5; FYN;
ESR2	4	464	2.07254	0.682956	0.842832	1	1	1	ACSL5; SPEG; GFAP; CEP128;
GLI1	1	148	0.518135	0.53927	0.849506	1	1	1	KRT79;
HENMT1	23	1144	11.9171	1.58951	0.018282	1	0.79386	1	CLEC1B; LIF; PPP1R16B; RANGRF; SLC31A1; SP100; FKBP9; LAT; PPP2R5B; JUP; OLFML2B; CAMSAP3; SPEG; HDAC4; C1QA; SLC29A1; FAM129B; KRT5; CFP; LRP1; ANG; FYN; GUCY1B3;
INSM1	6	487	3.10881	0.975242	0.584089	1	1	1	IL2; SEMA4D; TGFBI; GFAP; OLFM1; SLC44A1;
NHLH1	23	1144	11.9171	1.58951	0.018282	1	0.79386	1	CLEC1B; LIF; PPP1R16B; RANGRF; SLC31A1; SP100; FKBP9; LAT; PPP2R5B; JUP; OLFML2B; CAMSAP3; SPEG; HDAC4; C1QA; SLC29A1; FAM129B; KRT5; CFP; LRP1; ANG; FYN; GUCY1B3;
ZEB1	4	401	2.07254	0.790251	0.75075	1	1	1	SEMA4D; CAMSAP3; PHGDH; LIPG;
ZFP161	8	1137	4.14508	0.556729	0.978948	1	1	1	PFKFB3; TSPAN5; ZNF706; DCK; OXSR1; LIPA; CTSC; LRP5;
BACH2	10	628	5.18135	1.25963	0.273076	1	1	1	EFR3A; LIF; RPS6KA1; LAT; LAG3; ITIH4; CAMSAP3; KRT18; KRT5; LRP1;
EBF1	3	205	1.5544	1.16029	0.481988	1	1	1	RANGRF; JUP; SRM;
HOXA13	4	309	2.07254	1.02553	0.551727	1	1	1	RBM47; KRT1; VPS13A; PIK3AP1;
MSX2	5	344	2.59067	1.15091	0.440911	1	1	1	CDK6; CNOT10; RECQL; THOC2; NEU1;
NOBOX	5	621	2.59067	0.637551	0.898264	1	1	1	GORASP2; NCKAP1; RECQL; THOC2; NOTCH2;
TFAP4	17	1280	8.80829	1.05019	0.454373	1	1	1	CDK6; CNOT10; LRRC47; PPP1R16B; RANGRF; RPS6KA1; TNPO2; TUBA1C; PPP2R5B; OLFML2B; TCN2; LIMD1; SPEG; FOLR1; KRT5; LRP1; THBS3;
ATF3	11	800	5.69948	1.0876	0.432739	1	1	1	PAF1; RPS6KA1; SEMA4D; SLC31A1; ZFP36L1; DXO; CREM; AOAH; OXSR1; TPT1; THBS3;
TAL1	15	1113	7.77202	1.06575	0.438662	1	1	1	ACSL5; CDK6; CHST11; GLRX; LIF; RAC1; RPS6KA1; OLFML2B; LIMD1; TGFBI; CTSW; AOAH; VPS13A; ANG; FYN;
HOXA9	10	729	5.18135	1.08512	0.442961	1	1	1	CDK6; HEATR5B; SEMA4D; THOC2; FKBP9; TIMP2; IL1B; GLA; KRT10; NDRG3;
NFE2	7	518	3.62694	1.06944	0.48405	1	1	1	HDAC3; RPS6KA1; TUBA1C; ARHGAP18; SPEG; TIMP2; PLBD2;
LMO2	4	610	2.07254	0.519497	0.953005	1	1	1	ATP2B4; GORASP2; RBM47; PHGDH;
RUNX2	5	315	2.59067	1.25687	0.368301	1	1	1	LIF; RPS6KA1; FYN; THBS3; LRP5;
GATA1	4	728	2.07254	0.435294	0.9841	1	1	1	NOTCH2; NPL; NPM3; FYN;
FOXD3	2	361	1.03627	0.44	0.945254	1	1	1	THOC2; SLC7A1;
ISL2	7	515	3.62694	1.07567	0.477945	1	1	1	ARL6IP1; ATRX; THOC2; XRCC6; ARHGAP18; SYTL4; SPEG;
ZNF143	5	618	2.59067	0.640646	0.895944	1	1	1	KIAA1033; NUDCD1; POLE3; SLC2A1; KRT8;
CDX2	1	253	0.518135	0.315471	0.961179	1	1	1	FYN;
FOXO1	1	192	0.518135	0.415694	0.914604	1	1	1	CDK6;
GFI1	7	552	3.62694	1.00357	0.551626	1	1	1	ACSL5; IPO11; CREM; IL1B; ANG; FYN; SLC44A1;
HMX1	3	240	1.5544	0.99109	0.58827	1	1	1	SPEG; HDAC4; FYN;
HOXB9	7	537	3.62694	1.0316	0.522224	1	1	1	CNOT10; HEATR5B; IL18; HDAC4; TIMP2; RNASE6; IL1B;
PAX4	3	175	1.5544	1.35919	0.381798	1	1	1	AOAH; FYN; LRP5;
PDX1	5	372	2.59067	1.06429	0.509113	1	1	1	IPO11; SYTL4; OLFM1; CTSA; FYN;
EOMES	3	291	1.5544	0.817399	0.716105	1	1	1	HEATR5B; ITIH4; LIPG;
POU3F3	1	59	0.518135	1.35261	0.528929	1	1	1	LIPG;
TBX5	3	204	1.5544	1.16598	0.478761	1	1	1	HEATR5B; LIPG; SLC7A1;
ATF6	1	195	0.518135	0.409299	0.917846	1	1	1	TPT1;
STRA13	10	574	5.18135	1.37813	0.19224	1	1	1	PMVK; TNPO2; DCK; PLBD2; CTSA; GNS; GLA; SCPEP1; NEU1; HEXA;
ZIC1	12	548	6.21762	1.73193	0.046128	1	0.79386	1	ATP2B4; CDK6; HDAC3; URM1; JUP; FOLR1; LRP1; C3; SLC7A1; GLA; TPP1; PIK3AP1;
FOXJ2	2	299	1.03627	0.531234	0.895052	1	1	1	SRSF12; SLC44A1;
ELF1	11	585	5.69948	1.4873	0.123876	1	1	1	FAM45A; IL2; PPP1R16B; RAC1; RPS6KA1; SHOC2; TSG101; DCK; LAG3; C1QA; CTSA;
E4F1	3	158	1.5544	1.50542	0.323084	1	1	1	ADPGK; RNMT; TPT1;
ITGAL	2	178	1.03627	0.892334	0.661612	1	1	1	CNOT10; PPP2R5B;
ESX1	1	266	0.518135	0.300054	0.967196	1	1	1	SRSF12;
TLX2	1	60	0.518135	1.33007	0.534913	1	1	1	TNPO2;
DLX5	1	220	0.518135	0.362789	0.940508	1	1	1	CDK6;
HOXC10	1	81	0.518135	0.985277	0.644484	1	1	1	IL2;
ATF4	3	315	1.5544	0.755123	0.764711	1	1	1	PAF1; DXO; HDAC4;
ELF3	4	437	2.07254	0.725151	0.8075	1	1	1	ACSL5; PPP1R16B; CTSS; RNASE6;
SPDEF	3	189	1.5544	1.25851	0.429332	1	1	1	HEATR5B; CSF3; LRP1;
PAX5	2	149	1.03627	1.066	0.564916	1	1	1	HDAC3; AOAH;
NKX3-1	2	61	1.03627	2.60358	0.180426	1	1	1	CDK6; KRT5;
WT1	1	17	0.518135	4.69238	0.194742	1	1	1	CDK6;
RBPJ	5	235	2.59067	1.68472	0.177858	1	1	1	CDK6; CNOT10; ITIH4; KRT8; GUCY1B3;
MAFK	1	128	0.518135	0.623524	0.805402	1	1	1	SEMA4D;
ALX1	1	56	0.518135	1.42505	0.510514	1	1	1	AOAH;

## Sheet: Clinical phenotype
Analysis: Clinical phenotype
Dataset name: BanLecsecretomep005
Number of genes in the dataset: 217
Number of genes in the dataset (which are available in Clinical phenotype database) :40
Number of genes in background: 1820
Is analysis quantitative: No
						Corrected p-values
Clinical phenotype	No. of genes in the dataset	No. of genes in the background dataset	Percentage of genes	Fold enrichment	P-value (Hypergeometric test)	Bonferroni method	BH method	Q-value (Storey-Tibshirani method)	genes mapped (from input data set)
Abdomen	17	621	42.5	1.24598	0.167732	1	1	1	ATRX; NUP62; PRF1; SMPD1; SUCLG1; MSH2; ICOS; NOTCH2; TCN2; GCDH; KRT18; KRT8; GNS; VPS13A; GLA; LIPA; NEU1;
Abdominal pain	1	19	2.5	2.41682	0.345815	1	1	1	GLA;
Abdominal protuberance	1	2	2.5	22.8576	0.0434848	1	1	1	LIPA;
Abnormal eye movements, paroxysmal	1	1	2.5	45.4889	0.021978	1	0.960083	1	SLC2A1;
Abnormal Schilling test (not normalized by addition of intrinsic factor)	1	1	2.5	45.4889	0.021978	1	0.960083	1	TCN2;
Abnormal tonofibrils with formation of concentric unbroken shells of tonofilaments surrounding the nucleus on EM	1	1	2.5	45.4889	0.021978	1	0.960083	1	KRT1;
Abolished electroretinogram (ERG)	1	2	2.5	22.8576	0.0434848	1	1	1	TPP1;
Absence of corpus callosum	1	3	2.5	15.2637	0.0645303	1	1	1	PHGDH;
Absence of Hb H inclusions in red blood cells	1	1	2.5	45.4889	0.021978	1	0.960083	1	ATRX;
Absence of neurologic manifestations	1	1	2.5	45.4889	0.021978	1	0.960083	1	SMPD1;
Absence of olfactory bulbs	1	1	2.5	45.4889	0.021978	1	0.960083	1	PHGDH;
Absence of premature birth, low birthweight, and exposure to oxygen	1	2	2.5	22.8576	0.0434848	1	1	1	LRP5;
Absent anterior eye chamber	1	1	2.5	45.4889	0.021978	1	0.960083	1	LRP5;
Absent eyelashes	1	4	2.5	11.4573	0.085124	1	1	1	PHGDH;
Absent eyelids	1	1	2.5	45.4889	0.021978	1	0.960083	1	PHGDH;
Absent frontal sinus	1	2	2.5	22.8576	0.0434848	1	1	1	NOTCH2;
Absent frontal sinuses	1	4	2.5	11.4573	0.085124	1	1	1	ATRX;
Absent scalp hair	1	1	2.5	45.4889	0.021978	1	0.960083	1	PHGDH;
Acanthocytes	1	3	2.5	15.2637	0.0645303	1	1	1	VPS13A;
Acantholytic changes (in some patients)	1	1	2.5	45.4889	0.021978	1	0.960083	1	KRT5;
Acanthotic epidermis	2	2	5	45.4889	0.000471217	1	0.335993	1	KRT1; KRT10;
Acid cholesteryl ester hydrolase deficiency	1	1	2.5	45.4889	0.021978	1	0.960083	1	LIPA;
Acroosteolysis	2	6	5	15.2134	0.0066832	1	0.960083	1	NOTCH2; CTSC;
Acroparesthesias, episodic	1	1	2.5	45.4889	0.021978	1	0.960083	1	GLA;
Activated HLA DR+ T cells in peripheral blood	1	1	2.5	45.4889	0.021978	1	0.960083	1	PRF1;
Adducted thumbs	1	8	2.5	5.7358	0.163168	1	1	1	PHGDH;
Adenomatous colonic polyps	1	4	2.5	11.4573	0.085124	1	1	1	MSH2;
Adult patients have heterogeneous symptoms including some with relapsing-remitting symptoms similar to multiple sclerosis	1	1	2.5	45.4889	0.021978	1	0.960083	1	GFAP;
Agenesis of the corpus callosum (in some patients)	1	5	2.5	9.17041	0.105275	1	1	1	MSH2;
Age of onset 23-59 years	1	1	2.5	45.4889	0.021978	1	0.960083	1	VPS13A;
Aggregated tonofilaments at cell surface	1	2	2.5	22.8576	0.0434848	1	1	1	KRT1;
Aggressive behavior	1	20	2.5	2.29604	0.360345	1	1	1	HDAC4;
Aggressiveness	1	8	2.5	5.7358	0.163168	1	1	1	VPS13A;
Airways	2	66	5	1.38513	0.42991	1	1	1	ICOS; HEXA;
ALEXANDER DISEASE	1	1	2.5	45.4889	0.021978	1	0.960083	1	GFAP;
All cases occur in a Jewish religious isolate originally from Cochin, India	1	1	2.5	45.4889	0.021978	1	0.960083	1	CTSC;
Allelic disorder to EBS Dowling-Meara (	1	1	2.5	45.4889	0.021978	1	0.960083	1	KRT5;
Allelic disorder to Niemann-Pick disease type A (	1	1	2.5	45.4889	0.021978	1	0.960083	1	SMPD1;
Allelic disorder to Nieman-Pick disease type B (	1	1	2.5	45.4889	0.021978	1	0.960083	1	SMPD1;
Allelic disorder to osteoporosis-pseudoglioma syndrome (OPPG,	1	1	2.5	45.4889	0.021978	1	0.960083	1	LRP5;
Allelic to Groenouw type 1 corneal dystrophy (	1	1	2.5	45.4889	0.021978	1	0.960083	1	TGFBI;
Allelic to osteoporosis-pseudoglioma syndrome (	1	1	2.5	45.4889	0.021978	1	0.960083	1	LRP5;
Allelic to Papillon-Lefevre syndrome (	1	1	2.5	45.4889	0.021978	1	0.960083	1	CTSC;
Allelic to type I osteopetrosis (	1	1	2.5	45.4889	0.021978	1	0.960083	1	LRP5;
Alpha-galactosidase A deficiency in plasma, leukocytes, or fibroblasts	1	1	2.5	45.4889	0.021978	1	0.960083	1	GLA;
Alpha-thalassemia/mental retardation syndrome (	1	1	2.5	45.4889	0.021978	1	0.960083	1	ATRX;
Alveolar bone destruction	1	1	2.5	45.4889	0.021978	1	0.960083	1	CTSC;
Anemia	2	43	5	2.12585	0.243436	1	1	1	PRF1; GLA;
Angina	1	3	2.5	15.2637	0.0645303	1	1	1	GLA;
Angiokeratoma	1	4	2.5	11.4573	0.085124	1	1	1	GLA;
Anteverted nares	3	36	7.5	3.80232	0.0425463	1	1	1	ATRX; NOTCH2; GNS;
Anteverted nostrils	1	18	2.5	2.55101	0.330964	1	1	1	ATRX;
Anxiety	1	18	2.5	2.55101	0.330964	1	1	1	VPS13A;
Apathy	1	11	2.5	4.17291	0.217402	1	1	1	HEXA;
Arachnodactyly	1	16	2.5	2.86969	0.30027	1	1	1	CTSC;
Areflexia	1	38	2.5	1.20873	0.573985	1	1	1	VPS13A;
Arrhythmias (1 patient)	1	1	2.5	45.4889	0.021978	1	0.960083	1	HDAC4;
Arrhythmogenic right ventricular dysplasia	1	1	2.5	45.4889	0.021978	1	0.960083	1	JUP;
Aspiration	2	4	5	22.8012	0.00274911	1	0.960083	1	GM2A; HEXA;
Associated with deletion at chromosome 2q37	1	1	2.5	45.4889	0.021978	1	0.960083	1	HDAC4;
Astrocytoma	1	6	2.5	7.64455	0.124994	1	1	1	MSH2;
Asymmetric septal hypertrophy	1	7	2.5	6.55403	0.144288	1	1	1	GNS;
Ataxia	4	130	10	1.40305	0.318926	1	1	1	CLN5; PRF1; SLC2A1; TPP1;
Ataxia, episodic	1	3	2.5	15.2637	0.0645303	1	1	1	SLC2A1;
Ataxia (if untreated)	1	1	2.5	45.4889	0.021978	1	0.960083	1	TCN2;
Ataxia (type I and type II, infantile and juvenile)	1	1	2.5	45.4889	0.021978	1	0.960083	1	NEU1;
Athetosis (later)	1	1	2.5	45.4889	0.021978	1	0.960083	1	SMPD1;
Atrial septal defect	1	47	2.5	0.977319	0.652875	1	1	1	PHGDH;
Atrophic scarring (less common)	1	2	2.5	22.8576	0.0434848	1	1	1	KRT5;
Atrophic scarring (rare)	1	3	2.5	15.2637	0.0645303	1	1	1	KRT5;
Atrophy of alveolar ridges	1	1	2.5	45.4889	0.021978	1	0.960083	1	CTSC;
Atypical affected males, 'cardiac variants'	1	1	2.5	45.4889	0.021978	1	0.960083	1	GLA;
Autistic features	1	25	2.5	1.83702	0.4284	1	1	1	HDAC4;
Autofluorescent lipopigment in neurons	2	7	5	13.0432	0.00922682	1	0.960083	1	CLN5; TPP1;
Autoimmune neutropenia (less common)	1	1	2.5	45.4889	0.021978	1	0.960083	1	ICOS;
Autonomic dysfunction	1	7	2.5	6.55403	0.144288	1	1	1	GLA;
Autosomal dominant (2p16)	1	1	2.5	45.4889	0.021978	1	0.960083	1	MSH2;
Autosomal dominant (5q22-q33.3)	1	1	2.5	45.4889	0.021978	1	0.960083	1	TGFBI;
Autosomal dominant	12	747	30	0.731344	0.94728	1	1	1	SLC2A1; TSG101; MSH2; ITIH4; NOTCH2; TGFBI; GFAP; KRT5; KRT1; IL1B; KRT10; LRP5;
Autosomal locus and allelic heterogeneity	1	1	2.5	45.4889	0.021978	1	0.960083	1	IL2RA;
Autosomal recessive	24	924	60	1.18201	0.153641	1	1	1	CLN5; FBXO7; NUP62; PRF1; SMPD1; SUCLG1; MSH2; POLR1C; ICOS; JUP; TCN2; GCDH; PHGDH; KRT5; GM2A; CTSA; GNS; VPS13A; LIPA; TPP1; NEU1; CTSC; HEXA; LRP5;
Autosomal recessive cases, probably heterogeneous	2	2	5	45.4889	0.000471217	1	0.335993	1	KRT18; KRT8;
Autosomal recessive (rare)	1	2	2.5	22.8576	0.0434848	1	1	1	SLC2A1;
Average age at onset 38 years	1	4	2.5	11.4573	0.085124	1	1	1	IL1B;
Average age of onset 6 months (range birth - 2 years)	1	1	2.5	45.4889	0.021978	1	0.960083	1	GFAP;
Axillary freckling	1	5	2.5	9.17041	0.105275	1	1	1	MSH2;
Ballooned neurons	1	2	2.5	22.8576	0.0434848	1	1	1	HEXA;
Barrel chest	1	3	2.5	15.2637	0.0645303	1	1	1	LRP5;
Basal cell carcinoma	1	11	2.5	4.17291	0.217402	1	1	1	MSH2;
Basal cell layer contains clumped keratin filaments	1	1	2.5	45.4889	0.021978	1	0.960083	1	KRT5;
Bathrocephaly	1	1	2.5	45.4889	0.021978	1	0.960083	1	NOTCH2;
Behavioral Psychiatric Manifestations	6	200	15	1.36687	0.271616	1	1	1	ATRX; CLN5; HDAC4; GNS; VPS13A; HEXA;
Benign gastrointestinal tract tumors	1	2	2.5	22.8576	0.0434848	1	1	1	MSH2;
Benign genitourinary tract tumors	1	2	2.5	22.8576	0.0434848	1	1	1	MSH2;
Biconcave vertebrae	1	1	2.5	45.4889	0.021978	1	0.960083	1	NOTCH2;
Bifid uterus	1	2	2.5	22.8576	0.0434848	1	1	1	PHGDH;
Bitemporal narrowing	1	8	2.5	5.7358	0.163168	1	1	1	ATRX;
Bladder	1	90	2.5	0.51043	0.871424	1	1	1	ATRX;
Blindness	2	41	5	2.22952	0.22697	1	1	1	HEXA; LRP5;
Blindness (onset in infancy)	1	1	2.5	45.4889	0.021978	1	0.960083	1	LRP5;
Blistering at acral sites	1	1	2.5	45.4889	0.021978	1	0.960083	1	KRT5;
Blistering becomes confined to the palms and soles with age	1	2	2.5	22.8576	0.0434848	1	1	1	KRT5;
Blistering, generalized, recurrent (occurs after mild physical trauma)	1	2	2.5	22.8576	0.0434848	1	1	1	KRT5;
Blistering, generalized, recurrent, severe (occurs after mild physical trauma)	1	2	2.5	22.8576	0.0434848	1	1	1	KRT5;
Blistering may be generalized or localized	1	2	2.5	22.8576	0.0434848	1	1	1	KRT5;
Blistering occurs in clusters ('herpetiform', 'arcuate')	1	2	2.5	22.8576	0.0434848	1	1	1	KRT5;
Blistering of hands, elbows, feet, knees	1	2	2.5	22.8576	0.0434848	1	1	1	KRT5;
Blistering, recurrent	1	4	2.5	11.4573	0.085124	1	1	1	KRT5;
Blistering, recurrent, of the palms and soles	1	3	2.5	15.2637	0.0645303	1	1	1	KRT5;
Blistering tends to improve with age	1	2	2.5	22.8576	0.0434848	1	1	1	KRT5;
Bone marrow contains lipid-laden macrophages	1	1	2.5	45.4889	0.021978	1	0.960083	1	GLA;
Bone marrow foam cells (type II)	1	1	2.5	45.4889	0.021978	1	0.960083	1	NEU1;
Brachycephaly	1	37	2.5	1.24139	0.564209	1	1	1	HDAC4;
Brachydactyly	1	64	2.5	0.717759	0.764907	1	1	1	ATRX;
Brachydactyly type E	1	1	2.5	45.4889	0.021978	1	0.960083	1	HDAC4;
Bradykinesia	1	24	2.5	1.91353	0.41538	1	1	1	FBXO7;
Brain MRI shows lesions in the basal ganglia	1	1	2.5	45.4889	0.021978	1	0.960083	1	SUCLG1;
Breast cancer	1	5	2.5	9.17041	0.105275	1	1	1	MSH2;
BREAST CANCER	1	23	2.5	1.99669	0.40207	1	1	1	TSG101;
Breast cancer, lobular	1	4	2.5	11.4573	0.085124	1	1	1	IL1B;
Breast carcinoma	1	23	2.5	1.99669	0.40207	1	1	1	TSG101;
Broad face	1	4	2.5	11.4573	0.085124	1	1	1	HDAC4;
Broad nose	1	9	2.5	5.0992	0.181641	1	1	1	NOTCH2;
Broad upturned nose	1	1	2.5	45.4889	0.021978	1	0.960083	1	HDAC4;
Bronchiectasis	1	11	2.5	4.17291	0.217402	1	1	1	ICOS;
Bronchitis, recurrent	1	2	2.5	22.8576	0.0434848	1	1	1	ICOS;
Bulging fontanelle	1	1	2.5	45.4889	0.021978	1	0.960083	1	PRF1;
Cafe-au-lait spots	1	13	2.5	3.53142	0.251638	1	1	1	MSH2;
Calcaneovalgus	1	3	2.5	15.2637	0.0645303	1	1	1	PHGDH;
Camptodactyly	1	36	2.5	1.27586	0.554214	1	1	1	PHGDH;
Cardiac	1	55	2.5	0.835189	0.710901	1	1	1	CTSA;
Cardiomegaly	1	21	2.5	2.18676	0.374559	1	1	1	JUP;
Cardiomegaly (type II, infantile)	1	1	2.5	45.4889	0.021978	1	0.960083	1	NEU1;
Cardiomyopathy (type II, congenital)	1	1	2.5	45.4889	0.021978	1	0.960083	1	NEU1;
Cardiovascular	10	446	25	1.02093	0.532555	1	1	1	ATRX; ITIH4; JUP; NOTCH2; HDAC4; PHGDH; GNS; GLA; NEU1; LRP5;
'Carp-like' mouth	1	1	2.5	45.4889	0.021978	1	0.960083	1	ATRX;
Cataract	2	36	5	2.53909	0.186344	1	1	1	PHGDH; LRP5;
Cataracts, congenital	1	1	2.5	45.4889	0.021978	1	0.960083	1	PHGDH;
Caudate atrophy	1	3	2.5	15.2637	0.0645303	1	1	1	VPS13A;
Central Nervous System	23	887	57.5	1.18003	0.168215	1	1	1	ATRX; CLN5; FBXO7; NUP62; PRF1; SLC2A1; SMPD1; SUCLG1; MSH2; NOTCH2; TCN2; GCDH; HDAC4; GFAP; PHGDH; GNS; VPS13A; GLA; TPP1; NEU1; CTSC; HEXA; LRP5;
Cerebellar hypoplasia	1	24	2.5	1.91353	0.41538	1	1	1	PHGDH;
Cerebral atrophy	3	48	7.5	2.85194	0.0861166	1	1	1	ATRX; SUCLG1; TPP1;
Cervical instability	1	1	2.5	45.4889	0.021978	1	0.960083	1	NOTCH2;
Characteristic findings on MRI	1	1	2.5	45.4889	0.021978	1	0.960083	1	CLN5;
Cherry red macula	1	1	2.5	45.4889	0.021978	1	0.960083	1	GM2A;
Cherry-red maculae (50%)	1	1	2.5	45.4889	0.021978	1	0.960083	1	SMPD1;
Cherry-red maculae (less common)	1	1	2.5	45.4889	0.021978	1	0.960083	1	SMPD1;
Cherry-red spot (type II, infantile and juvenile and type I)	1	1	2.5	45.4889	0.021978	1	0.960083	1	NEU1;
Chest	2	243	5	0.376251	0.977829	1	1	1	GNS; LRP5;
Childhood onset has been reported in 1 family	1	1	2.5	45.4889	0.021978	1	0.960083	1	FBXO7;
Choreoathetosis	2	17	5	5.37523	0.0520285	1	1	1	SLC2A1; GCDH;
Choreoathetosis (in a subset of patients)	1	1	2.5	45.4889	0.021978	1	0.960083	1	SLC2A1;
Choreoathetosis of the face, trunk, extremities	1	1	2.5	45.4889	0.021978	1	0.960083	1	NUP62;
Choroid plexus cyst	1	1	2.5	45.4889	0.021978	1	0.960083	1	PHGDH;
Circumscribed clumps of keratin filaments (some associated with desmosomes)	2	2	5	45.4889	0.000471217	1	0.335993	1	KRT1; KRT10;
CIRRHOSIS, FAMILIAL	2	2	5	45.4889	0.000471217	1	0.335993	1	KRT18; KRT8;
Claw-like volar curve	1	1	2.5	45.4889	0.021978	1	0.960083	1	CTSC;
Clear corneas	1	4	2.5	11.4573	0.085124	1	1	1	GNS;
Cleavage within basal keratinocytes	1	3	2.5	15.2637	0.0645303	1	1	1	KRT5;
Cleft lip	1	43	2.5	1.06821	0.619749	1	1	1	PHGDH;
Cleft lip (in some patients)	1	6	2.5	7.64455	0.124994	1	1	1	IL1B;
Cleft palate	2	97	5	0.942507	0.639451	1	1	1	POLR1C; PHGDH;
Cleft palate (in some patients)	1	7	2.5	6.55403	0.144288	1	1	1	IL1B;
Clinical variability	2	6	5	15.2134	0.0066832	1	0.960083	1	VPS13A; LRP5;
Clinodactyly	2	39	5	2.34383	0.210606	1	1	1	ATRX; PHGDH;
Clinodactyly of isolated digits	1	1	2.5	45.4889	0.021978	1	0.960083	1	ATRX;
Clumping of keratin filaments in basal epidermal cells	1	2	2.5	22.8576	0.0434848	1	1	1	KRT5;
Clumsiness	1	3	2.5	15.2637	0.0645303	1	1	1	CLN5;
Coarse facial features	2	15	5	6.09145	0.0412902	1	1	1	ATRX; GNS;
Coarse facies	2	28	5	3.26429	0.124478	1	1	1	NOTCH2; CTSA;
Coarse facies (type II, all types)	1	1	2.5	45.4889	0.021978	1	0.960083	1	NEU1;
Coarse hair	1	9	2.5	5.0992	0.181641	1	1	1	GNS;
Coarsened pattern of sulci and gyri	1	1	2.5	45.4889	0.021978	1	0.960083	1	GFAP;
Cognitive impairment	1	7	2.5	6.55403	0.144288	1	1	1	SLC2A1;
Coloboma, lower eyelid	1	1	2.5	45.4889	0.021978	1	0.960083	1	POLR1C;
Colon cancer	1	4	2.5	11.4573	0.085124	1	1	1	MSH2;
Colonic adenocarcinoma	1	4	2.5	11.4573	0.085124	1	1	1	MSH2;
Colonic diverticula (early onset)	1	2	2.5	22.8576	0.0434848	1	1	1	MSH2;
Colorectal cancer (in some patients)	1	4	2.5	11.4573	0.085124	1	1	1	IL1B;
Coma	1	48	2.5	0.956962	0.660706	1	1	1	PRF1;
Concentration difficulties	1	1	2.5	45.4889	0.021978	1	0.960083	1	CLN5;
Conductive hearing loss	1	22	2.5	2.0874	0.388466	1	1	1	LRP5;
Confusion, paroxysmal	1	1	2.5	45.4889	0.021978	1	0.960083	1	SLC2A1;
Congenital cirrhosis	2	2	5	45.4889	0.000471217	1	0.335993	1	KRT18; KRT8;
Congenital heart disease (variable)	1	1	2.5	45.4889	0.021978	1	0.960083	1	NOTCH2;
Congenital palmoplantar keratosis	1	1	2.5	45.4889	0.021978	1	0.960083	1	CTSC;
Congestive heart failure	1	25	2.5	1.83702	0.4284	1	1	1	GLA;
Conjunctivitis	1	17	2.5	2.70099	0.315785	1	1	1	ICOS;
Constipation	2	41	5	2.22952	0.22697	1	1	1	ATRX; SMPD1;
Corneal and lenticular opacities	1	1	2.5	45.4889	0.021978	1	0.960083	1	GLA;
Corneal arcus	1	8	2.5	5.7358	0.163168	1	1	1	ITIH4;
Coronary artery disease presenting after age 30 years in heterozygotes, in childhood in homozygotes	1	7	2.5	6.55403	0.144288	1	1	1	ITIH4;
Coxa valga	1	22	2.5	2.0874	0.388466	1	1	1	ATRX;
Cox-negative fibers seen on muscle biopsy	1	1	2.5	45.4889	0.021978	1	0.960083	1	SUCLG1;
Cranial osteosclerosis	1	1	2.5	45.4889	0.021978	1	0.960083	1	LRP5;
Crowded carpal bones	1	1	2.5	45.4889	0.021978	1	0.960083	1	NOTCH2;
Cryptorchidism	3	101	7.5	1.35552	0.384719	1	1	1	ATRX; NOTCH2; PHGDH;
CSF pleocytosis, particularly of lymphocytes	1	1	2.5	45.4889	0.021978	1	0.960083	1	PRF1;
Curly hair	1	4	2.5	11.4573	0.085124	1	1	1	JUP;
Curved nails	1	1	2.5	45.4889	0.021978	1	0.960083	1	NOTCH2;
Curvilinear profiles' ultrastructurally	1	1	2.5	45.4889	0.021978	1	0.960083	1	TPP1;
Curvilinear' profiles ultrastructurally	1	2	2.5	22.8576	0.0434848	1	1	1	CLN5;
Cytolysis	2	2	5	45.4889	0.000471217	1	0.335993	1	KRT1; KRT10;
Cytolysis of keratinocytes in spinous and granular layers	1	2	2.5	22.8576	0.0434848	1	1	1	KRT1;
Dandy-Walker malformation	1	12	2.5	3.82546	0.234707	1	1	1	PHGDH;
Death at 10 to 15 years	1	1	2.5	45.4889	0.021978	1	0.960083	1	TPP1;
Death at 13 to 30 years	1	1	2.5	45.4889	0.021978	1	0.960083	1	CLN5;
Death by age 3 years	1	1	2.5	45.4889	0.021978	1	0.960083	1	SMPD1;
Death by age 5 (infantile form)	1	1	2.5	45.4889	0.021978	1	0.960083	1	GFAP;
Death secondary to renal failure, cardiac or cerebrovascular disease	1	1	2.5	45.4889	0.021978	1	0.960083	1	GLA;
Death usually in infancy	1	4	2.5	11.4573	0.085124	1	1	1	SUCLG1;
Deceleration of head growth	1	3	2.5	15.2637	0.0645303	1	1	1	SLC2A1;
Decreased acid sphingomyelinase activity	1	1	2.5	45.4889	0.021978	1	0.960083	1	SMPD1;
Decreased acid sphingomyelinase activity (less than 5%)	1	1	2.5	45.4889	0.021978	1	0.960083	1	SMPD1;
Decreased activity and protein levels of respiratory chain complexes I, II, III, and IV	1	1	2.5	45.4889	0.021978	1	0.960083	1	SUCLG1;
Decreased bone mineral density	1	3	2.5	15.2637	0.0645303	1	1	1	LRP5;
Decreased CSF glycine	1	1	2.5	45.4889	0.021978	1	0.960083	1	PHGDH;
Decreased CSF serine	1	1	2.5	45.4889	0.021978	1	0.960083	1	PHGDH;
Decreased fetal activity	1	6	2.5	7.64455	0.124994	1	1	1	PHGDH;
Decreased gonial angle (endosteal hyperostosis)	1	1	2.5	45.4889	0.021978	1	0.960083	1	LRP5;
Decreased HDL	1	1	2.5	45.4889	0.021978	1	0.960083	1	PRF1;
Decreased HDL cholesterol	1	5	2.5	9.17041	0.105275	1	1	1	SMPD1;
Decreased IgA	1	1	2.5	45.4889	0.021978	1	0.960083	1	TCN2;
Decreased IgG	1	1	2.5	45.4889	0.021978	1	0.960083	1	TCN2;
Decreased IgM	1	2	2.5	22.8576	0.0434848	1	1	1	TCN2;
Decreased PHGDH activity (fibroblasts)	1	1	2.5	45.4889	0.021978	1	0.960083	1	PHGDH;
Decreased platelets	1	1	2.5	45.4889	0.021978	1	0.960083	1	SMPD1;
Decreased pulmonary diffusion secondary to alveolar infiltration	1	1	2.5	45.4889	0.021978	1	0.960083	1	SMPD1;
Decreased vision	1	3	2.5	15.2637	0.0645303	1	1	1	GNS;
Decreased visual acuity	1	21	2.5	2.18676	0.374559	1	1	1	LRP5;
Decrease plasma serine (fasting)	1	1	2.5	45.4889	0.021978	1	0.960083	1	PHGDH;
Deeper, fusiform lattice deposits develop later	1	1	2.5	45.4889	0.021978	1	0.960083	1	TGFBI;
Deep fissures of skin creases	1	1	2.5	45.4889	0.021978	1	0.960083	1	KRT1;
Defective antibody production	1	2	2.5	22.8576	0.0434848	1	1	1	ICOS;
Deficiency of properdin P factor	1	1	2.5	45.4889	0.021978	1	0.960083	1	CFP;
Deficiency of serum properdin P factor	1	1	2.5	45.4889	0.021978	1	0.960083	1	CFP;
Degeneration of basal epidermal cells	1	1	2.5	45.4889	0.021978	1	0.960083	1	KRT5;
Delayed bone age	1	31	2.5	1.48158	0.500788	1	1	1	ATRX;
Delayed developmental milestones	1	1	2.5	45.4889	0.021978	1	0.960083	1	ATRX;
Delayed myelination	1	10	2.5	4.58979	0.199716	1	1	1	GCDH;
Delayed psychomotor development	1	30	2.5	1.53095	0.489377	1	1	1	PRF1;
Delayed psychomotor development, severe	1	5	2.5	9.17041	0.105275	1	1	1	SUCLG1;
Delayed puberty	1	16	2.5	2.86969	0.30027	1	1	1	GLA;
Delivery	1	43	2.5	1.06821	0.619749	1	1	1	NEU1;
Dementia	1	34	2.5	1.35089	0.533548	1	1	1	HEXA;
Dementia (in some patients)	1	3	2.5	15.2637	0.0645303	1	1	1	VPS13A;
Dense bones with thick cortices	1	1	2.5	45.4889	0.021978	1	0.960083	1	LRP5;
Dense, rough, and bristly hair	1	1	2.5	45.4889	0.021978	1	0.960083	1	JUP;
Dense whorls of keratin filaments in the lower and middle spinous layers	2	2	5	45.4889	0.000471217	1	0.335993	1	KRT1; KRT10;
Deposits may recur in graft after corneal transplantation	1	1	2.5	45.4889	0.021978	1	0.960083	1	TGFBI;
Depressed nasal bridge	1	38	2.5	1.20873	0.573985	1	1	1	ATRX;
Developmental arrest	1	1	2.5	45.4889	0.021978	1	0.960083	1	NUP62;
Developmental delay	2	141	5	0.648412	0.829945	1	1	1	SLC2A1; HDAC4;
Developmental regression	2	5	5	18.25	0.00451817	1	0.960083	1	CLN5; NUP62;
Developmental regression after age 2 years	1	1	2.5	45.4889	0.021978	1	0.960083	1	TPP1;
Diabetes mellitus, insulin-dependent	1	2	2.5	22.8576	0.0434848	1	1	1	IL2RA;
Diarrhea	3	56	7.5	2.44459	0.122567	1	1	1	ICOS; TCN2; GNS;
Diffuse demyelination (increased signal intensity in T2-weighted images, especially frontal lobes)	1	1	2.5	45.4889	0.021978	1	0.960083	1	GFAP;
Diffuse punctate adrenal calcification	1	1	2.5	45.4889	0.021978	1	0.960083	1	LIPA;
Diffuse reticular or finely nodular infiltrations	1	1	2.5	45.4889	0.021978	1	0.960083	1	SMPD1;
Diffuse, symmetrical osteosclerosis	1	1	2.5	45.4889	0.021978	1	0.960083	1	LRP5;
Dilated cardiomyopathy	1	10	2.5	4.58979	0.199716	1	1	1	JUP;
Dilation of lateral ventricles	1	1	2.5	45.4889	0.021978	1	0.960083	1	GCDH;
Diplopia	1	8	2.5	5.7358	0.163168	1	1	1	SLC2A1;
Discrete 2 to 5-mm hyper- and hypopigmented macules	1	1	2.5	45.4889	0.021978	1	0.960083	1	KRT5;
Disease exacerbation during summer due to heat	1	3	2.5	15.2637	0.0645303	1	1	1	KRT5;
Disinhibition	1	10	2.5	4.58979	0.199716	1	1	1	VPS13A;
Dislocation of radial head	1	1	2.5	45.4889	0.021978	1	0.960083	1	NOTCH2;
Disorders with overlapping phenotypes can be caused by mutation in the keratin-14 gene (	1	1	2.5	45.4889	0.021978	1	0.960083	1	KRT5;
Dolichocephaly	1	21	2.5	2.18676	0.374559	1	1	1	ATRX;
Downslanting palpebral fissures	2	57	5	1.6038	0.358663	1	1	1	POLR1C; NOTCH2;
Drooling	3	14	7.5	9.77313	0.00302842	1	0.960083	1	ATRX; GNS; VPS13A;
Duodenal carcinoma	1	2	2.5	22.8576	0.0434848	1	1	1	MSH2;
Dural and choroid plexus calcifications	1	1	2.5	45.4889	0.021978	1	0.960083	1	CTSC;
Dwarfism	1	9	2.5	5.0992	0.181641	1	1	1	CTSA;
Dysarthria	4	118	10	1.54572	0.258275	1	1	1	FBXO7; SLC2A1; GNS; VPS13A;
Dysfunctional alternative complement pathway	1	1	2.5	45.4889	0.021978	1	0.960083	1	CFP;
Dyskinesias	1	2	2.5	22.8576	0.0434848	1	1	1	SLC2A1;
Dysmetria (type I)	1	1	2.5	45.4889	0.021978	1	0.960083	1	NEU1;
Dysmyelination	1	3	2.5	15.2637	0.0645303	1	1	1	PHGDH;
Dysostosis multiplex	1	9	2.5	5.0992	0.181641	1	1	1	CTSA;
Dysostosis multiplex (type II, all types)	1	1	2.5	45.4889	0.021978	1	0.960083	1	NEU1;
Dysphagia	3	67	7.5	2.0433	0.180176	1	1	1	NUP62; GNS; VPS13A;
Dyspnea	1	13	2.5	3.53142	0.251638	1	1	1	SMPD1;
Dystonia	5	71	12.5	3.2094	0.0178001	1	0.960083	1	FBXO7; NUP62; SLC2A1; GCDH; VPS13A;
Dystonia, paroxysmal	1	2	2.5	22.8576	0.0434848	1	1	1	SLC2A1;
Dystrophic nails	1	14	2.5	3.27936	0.268204	1	1	1	KRT5;
Dystrophic nails (less common)	1	2	2.5	22.8576	0.0434848	1	1	1	KRT5;
Early adult onset has been reported	1	3	2.5	15.2637	0.0645303	1	1	1	KRT5;
Early tooth loss	1	2	2.5	22.8576	0.0434848	1	1	1	NOTCH2;
Ears	10	442	25	1.03017	0.519465	1	1	1	ATRX; SUCLG1; POLR1C; ICOS; NOTCH2; HDAC4; PHGDH; GNS; NEU1; LRP5;
Eczema	1	16	2.5	2.86969	0.30027	1	1	1	HDAC4;
EEG abnormalities	1	7	2.5	6.55403	0.144288	1	1	1	SLC2A1;
EKG abnormalities	1	2	2.5	22.8576	0.0434848	1	1	1	JUP;
Electrocardiographic changes	1	1	2.5	45.4889	0.021978	1	0.960083	1	GLA;
Electron Microscopy	3	27	7.5	5.06929	0.0199666	1	0.960083	1	KRT5; KRT1; KRT10;
Electron microscopy of foam cells shows lamellar inclusions	1	1	2.5	45.4889	0.021978	1	0.960083	1	SMPD1;
Elevated bone mass	1	1	2.5	45.4889	0.021978	1	0.960083	1	LRP5;
Elevated CSF protein	1	2	2.5	22.8576	0.0434848	1	1	1	GFAP;
Elongated mandible	1	1	2.5	45.4889	0.021978	1	0.960083	1	LRP5;
Elongated sella turcica	1	1	2.5	45.4889	0.021978	1	0.960083	1	NOTCH2;
EM of skin biopsy and peripheral blood lymphocytes shows membrane-bound fibrillogranular inclusions	1	1	2.5	45.4889	0.021978	1	0.960083	1	CTSA;
Encephalitis	1	3	2.5	15.2637	0.0645303	1	1	1	PRF1;
Endocrine	1	44	2.5	1.04394	0.628308	1	1	1	IL2RA;
Endosteal sclerosis of cranium	1	1	2.5	45.4889	0.021978	1	0.960083	1	LRP5;
Enlarged mandible	1	2	2.5	22.8576	0.0434848	1	1	1	LRP5;
Enteritis, recurrent	1	2	2.5	22.8576	0.0434848	1	1	1	ICOS;
Eosinophils and neutrophils in the epidermis	2	2	5	45.4889	0.000471217	1	0.335993	1	KRT1; KRT10;
Ependymoma	1	6	2.5	7.64455	0.124994	1	1	1	MSH2;
Epicanthal folds	2	61	5	1.49865	0.390755	1	1	1	ATRX; NOTCH2;
Epidermal spongiosis	2	2	5	45.4889	0.000471217	1	0.335993	1	KRT1; KRT10;
Epidermolysis bullosa simplex	1	2	2.5	22.8576	0.0434848	1	1	1	KRT5;
EPIDERMOLYSIS BULLOSA SIMPLEX, DOWLING-MEARA TYPE	1	2	2.5	22.8576	0.0434848	1	1	1	KRT5;
EPIDERMOLYSIS BULLOSA SIMPLEX, GENERALIZED	1	2	2.5	22.8576	0.0434848	1	1	1	KRT5;
EPIDERMOLYSIS BULLOSA SIMPLEX, LOCALIZED	1	3	2.5	15.2637	0.0645303	1	1	1	KRT5;
Epiphyseal stippling (type II, congenital)	1	1	2.5	45.4889	0.021978	1	0.960083	1	NEU1;
Episodes of ventricular tachycardia	1	1	2.5	45.4889	0.021978	1	0.960083	1	JUP;
Episodic diarrhea	1	1	2.5	45.4889	0.021978	1	0.960083	1	GLA;
Erythema, blisters, pustules (cyclical, explosive episodes)	2	2	5	45.4889	0.000471217	1	0.335993	1	KRT1; KRT10;
Everted ears	1	1	2.5	45.4889	0.021978	1	0.960083	1	ATRX;
Exotropia (less common)	1	1	2.5	45.4889	0.021978	1	0.960083	1	ATRX;
Expressive speech absent	1	1	2.5	45.4889	0.021978	1	0.960083	1	ATRX;
Extensor plantar responses	2	65	5	1.40644	0.422175	1	1	1	FBXO7; SLC2A1;
External Features	5	180	12.5	1.26604	0.361604	1	1	1	ATRX; SMPD1; NOTCH2; NEU1; LRP5;
External Genitalia (Male)	3	151	7.5	0.906705	0.658547	1	1	1	ATRX; NOTCH2; NEU1;
Extrapyramidal signs	1	19	2.5	2.41682	0.345815	1	1	1	FBXO7;
Extrapyramidal signs show a favorable response to levodopa	1	1	2.5	45.4889	0.021978	1	0.960083	1	FBXO7;
Eyes	20	826	50	1.10196	0.331617	1	1	1	ATRX; CLN5; FBXO7; NUP62; SLC2A1; SMPD1; POLR1C; ICOS; ITIH4; NOTCH2; HDAC4; TGFBI; PHGDH; GM2A; GNS; GLA; TPP1; NEU1; HEXA; LRP5;
FABRY DISEASE	1	1	2.5	45.4889	0.021978	1	0.960083	1	GLA;
Face	9	433	22.5	0.946525	0.638086	1	1	1	ATRX; POLR1C; NOTCH2; HDAC4; PHGDH; GNS; VPS13A; NEU1; LRP5;
Facial edema (type II, congenital)	1	1	2.5	45.4889	0.021978	1	0.960083	1	NEU1;
Failure of suture ossification	1	1	2.5	45.4889	0.021978	1	0.960083	1	NOTCH2;
Failure to thrive	7	202	17.5	1.57852	0.147039	1	1	1	NUP62; PRF1; SMPD1; SUCLG1; NOTCH2; TCN2; GCDH;
Falciform retinal folds	1	2	2.5	22.8576	0.0434848	1	1	1	LRP5;
Fasciculations	1	15	2.5	3.06088	0.284412	1	1	1	GLA;
Favorable response to a ketogenic diet	1	1	2.5	45.4889	0.021978	1	0.960083	1	SLC2A1;
Feeding difficulties	2	18	5	5.07677	0.0577337	1	1	1	SMPD1; SUCLG1;
Feet	8	345	20	1.0561	0.496979	1	1	1	ATRX; FBXO7; NOTCH2; HDAC4; PHGDH; VPS13A; CTSC; LRP5;
Female carriers experience significant clinical manifestations	1	1	2.5	45.4889	0.021978	1	0.960083	1	GLA;
Fever	2	17	5	5.37523	0.0520285	1	1	1	KRT18; KRT8;
Filiform epithelial downgrowth of epidermal rete ridges	1	1	2.5	45.4889	0.021978	1	0.960083	1	KRT5;
'Fingerprint' profiles ultrastructurally	1	2	2.5	22.8576	0.0434848	1	1	1	CLN5;
Fingers in mouth	1	1	2.5	45.4889	0.021978	1	0.960083	1	ATRX;
Finger syndactyly	1	1	2.5	45.4889	0.021978	1	0.960083	1	PHGDH;
Flat, broad nasal bridge	1	4	2.5	11.4573	0.085124	1	1	1	ATRX;
Flat nasal bridge	1	21	2.5	2.18676	0.374559	1	1	1	GNS;
Flattened forehead (adolescence)	1	1	2.5	45.4889	0.021978	1	0.960083	1	LRP5;
Flattened nose	1	4	2.5	11.4573	0.085124	1	1	1	PHGDH;
Flexion contractures of joints	1	1	2.5	45.4889	0.021978	1	0.960083	1	PHGDH;
Foreign body sensation if erosions occur	1	1	2.5	45.4889	0.021978	1	0.960083	1	TGFBI;
Four clinically indistinguishable biochemically distinct forms (see	1	1	2.5	45.4889	0.021978	1	0.960083	1	GNS;
Fracture resistance	1	1	2.5	45.4889	0.021978	1	0.960083	1	LRP5;
Frequent respiratory infections	1	2	2.5	22.8576	0.0434848	1	1	1	SMPD1;
Frequent upper respiratory tract infections	1	4	2.5	11.4573	0.085124	1	1	1	GNS;
Frontotemporal atrophy	1	2	2.5	22.8576	0.0434848	1	1	1	GCDH;
Full cheeks	1	8	2.5	5.7358	0.163168	1	1	1	NOTCH2;
Full lips	1	7	2.5	6.55403	0.144288	1	1	1	ATRX;
Gastric cancer, diffuse type, poorly differentiated, high-grade submucosal lesions	1	4	2.5	11.4573	0.085124	1	1	1	IL1B;
Gastroesophageal reflux	1	13	2.5	3.53142	0.251638	1	1	1	ATRX;
Gastrointestinal	11	425	27.5	1.1784	0.321489	1	1	1	ATRX; NUP62; SMPD1; SUCLG1; MSH2; ICOS; NOTCH2; TCN2; GNS; VPS13A; GLA;
Generalized edema	1	1	2.5	45.4889	0.021978	1	0.960083	1	PRF1;
Generalized erythroderma	2	3	5	30.3763	0.00139395	1	0.960083	1	KRT1; KRT10;
Generalized tissue edema	1	1	2.5	45.4889	0.021978	1	0.960083	1	PHGDH;
Genetic heterogeneity	2	142	5	0.643847	0.833005	1	1	1	TSG101; CTSC;
Genetic heterogeneity (see	1	18	2.5	2.55101	0.330964	1	1	1	LRP5;
Genetic heterogeneity, see EVR1 (	1	1	2.5	45.4889	0.021978	1	0.960083	1	LRP5;
Genetic heterogeneity, see mitochondrial inheritance of the disorder (	1	1	2.5	45.4889	0.021978	1	0.960083	1	NUP62;
Genitourinary	5	478	12.5	0.476767	0.990266	1	1	1	ATRX; NOTCH2; PHGDH; GLA; NEU1;
Genua valga	1	3	2.5	15.2637	0.0645303	1	1	1	ATRX;
Genu valgum	1	20	2.5	2.29604	0.360345	1	1	1	NOTCH2;
GI	4	63	10	2.89494	0.0468867	1	1	1	KRT18; KRT8; CTSA; LIPA;
Gingival recession	1	1	2.5	45.4889	0.021978	1	0.960083	1	CTSC;
Glare	1	1	2.5	45.4889	0.021978	1	0.960083	1	TGFBI;
Glioblastoma	1	4	2.5	11.4573	0.085124	1	1	1	MSH2;
GLUTARIC ACIDEMIA I	1	1	2.5	45.4889	0.021978	1	0.960083	1	GCDH;
Glutaricaciduria	1	1	2.5	45.4889	0.021978	1	0.960083	1	GCDH;
Glutaryl-CoA dehydrogenase deficiency	1	1	2.5	45.4889	0.021978	1	0.960083	1	GCDH;
Gm2-ganglioside accumulation	2	2	5	45.4889	0.000471217	1	0.335993	1	GM2A; HEXA;
GM2-GANGLIOSIDOSIS, AB VARIANT	1	1	2.5	45.4889	0.021978	1	0.960083	1	GM2A;
Granular corneal dystrophy	1	1	2.5	45.4889	0.021978	1	0.960083	1	TGFBI;
Granular deposits replace epithelial basement membrane	1	1	2.5	45.4889	0.021978	1	0.960083	1	TGFBI;
Gray, crumb-like granular deposits in anterior third of stroma	1	1	2.5	45.4889	0.021978	1	0.960083	1	TGFBI;
Gray, granular-appearing maculae	1	1	2.5	45.4889	0.021978	1	0.960083	1	SMPD1;
Gray matter heterotopia (in some patients)	1	4	2.5	11.4573	0.085124	1	1	1	MSH2;
Growth	17	609	42.5	1.27053	0.145859	1	1	1	ATRX; NUP62; PRF1; SMPD1; SUCLG1; NOTCH2; TCN2; GCDH; HDAC4; PHGDH; KRT5; CTSA; GNS; GLA; LIPA; NEU1; LRP5;
Growth retardation	3	57	7.5	2.40171	0.127478	1	1	1	ATRX; PHGDH; KRT5;
Gut dysmotility	1	1	2.5	45.4889	0.021978	1	0.960083	1	ATRX;
Hair	6	240	15	1.13907	0.435649	1	1	1	JUP; NOTCH2; PHGDH; KRT1; GNS; KRT10;
Halos around lights	1	1	2.5	45.4889	0.021978	1	0.960083	1	TGFBI;
Hands	7	349	17.5	0.913662	0.670872	1	1	1	ATRX; NOTCH2; HDAC4; PHGDH; GLA; CTSC; LRP5;
Hb H erythrocyte inclusions	1	1	2.5	45.4889	0.021978	1	0.960083	1	ATRX;
Head	10	345	25	1.3198	0.212344	1	1	1	ATRX; PRF1; SLC2A1; ICOS; NOTCH2; GCDH; HDAC4; GFAP; PHGDH; LRP5;
Headache	2	12	5	7.61304	0.0270521	1	1	1	SLC2A1; LRP5;
Head and Neck	28	954	70	1.33557	0.0172168	1	0.960083	1	ATRX; CLN5; FBXO7; NUP62; PRF1; SLC2A1; SMPD1; SUCLG1; POLR1C; ICOS; ITIH4; NOTCH2; TCN2; GCDH; HDAC4; TGFBI; GFAP; PHGDH; KRT5; GNS; VPS13A; IL1B; GLA; TPP1; NEU1; CTSC; HEXA; LRP5;
Hearing impairment (rare)	1	1	2.5	45.4889	0.021978	1	0.960083	1	SUCLG1;
Hearing loss	1	41	2.5	1.12031	0.60205	1	1	1	GNS;
Hearing loss, conductive	1	14	2.5	3.27936	0.268204	1	1	1	NOTCH2;
Hearing loss, sensorineural	1	38	2.5	1.20873	0.573985	1	1	1	LRP5;
Hearing loss, sensorineural (type II)	1	1	2.5	45.4889	0.021978	1	0.960083	1	NEU1;
Heart	10	351	25	1.29724	0.228854	1	1	1	ATRX; ITIH4; JUP; NOTCH2; HDAC4; PHGDH; GNS; GLA; NEU1; LRP5;
HEENT	1	28	2.5	1.64026	0.465788	1	1	1	CTSA;
Height	7	290	17.5	1.09954	0.458894	1	1	1	ATRX; SMPD1; NOTCH2; HDAC4; GNS; NEU1; LRP5;
Hematology	8	229	20	1.59105	0.120049	1	1	1	ATRX; PRF1; SMPD1; TCN2; PHGDH; VPS13A; GLA; NEU1;
Hemiparesis, paroxysmal	1	1	2.5	45.4889	0.021978	1	0.960083	1	SLC2A1;
Hemiplegia	1	3	2.5	15.2637	0.0645303	1	1	1	PRF1;
Hemivertebra	1	1	2.5	45.4889	0.021978	1	0.960083	1	ATRX;
Hemophagocytosis in bone marrow, lymph nodes, spleen, liver, and central nervous system	1	1	2.5	45.4889	0.021978	1	0.960083	1	PRF1;
Hemorrhagic blisters	1	2	2.5	22.8576	0.0434848	1	1	1	KRT5;
Heparan sulfate excretion in urine	1	4	2.5	11.4573	0.085124	1	1	1	GNS;
Hepatomegaly	4	130	10	1.40305	0.318926	1	1	1	PRF1; SMPD1; ICOS; GCDH;
Hepatomegaly (type II, all subtypes)	1	1	2.5	45.4889	0.021978	1	0.960083	1	NEU1;
Herpes infections	1	1	2.5	45.4889	0.021978	1	0.960083	1	ICOS;
Heterozygotes are not affected	1	2	2.5	22.8576	0.0434848	1	1	1	KRT5;
Hexosaminidase A deficiency	1	1	2.5	45.4889	0.021978	1	0.960083	1	HEXA;
High-arched palate	2	86	5	1.06305	0.57233	1	1	1	ATRX; NOTCH2;
Hirsutism	2	22	5	4.15414	0.0825246	1	1	1	NOTCH2; GNS;
Histopathology shows fusiform amyloid deposits in the deeper stroma as seen in lattice dystrophy	1	1	2.5	45.4889	0.021978	1	0.960083	1	TGFBI;
Histopathology shows hyaline changes consistent with granular dystrophy in the anterior stroma	1	1	2.5	45.4889	0.021978	1	0.960083	1	TGFBI;
Horizontal pendular nystagmus	1	2	2.5	22.8576	0.0434848	1	1	1	LRP5;
Hydranencephaly	1	4	2.5	11.4573	0.085124	1	1	1	PHGDH;
Hydrocephalus	2	49	5	1.86559	0.293074	1	1	1	NOTCH2; GFAP;
Hydronephrosis	1	38	2.5	1.20873	0.573985	1	1	1	ATRX;
Hydrops fetalis (type II, congenital)	1	1	2.5	45.4889	0.021978	1	0.960083	1	NEU1;
Hyperactivity	3	36	7.5	3.80232	0.0425463	1	1	1	ATRX; HDAC4; GNS;
Hypercholesterolemia, 350-550 mg/L in heterozygotes, 650-1000 mg/L in homozygotes	1	7	2.5	6.55403	0.144288	1	1	1	ITIH4;
HYPERCHOLESTEROLEMIA, FAMILIAL	1	7	2.5	6.55403	0.144288	1	1	1	ITIH4;
Hyperextensible joints	1	5	2.5	9.17041	0.105275	1	1	1	LRP5;
Hyperfolded ears	1	1	2.5	45.4889	0.021978	1	0.960083	1	ATRX;
Hyperhidrosis	1	8	2.5	5.7358	0.163168	1	1	1	SUCLG1;
Hyperkeratosis, focal, on the palms and soles (in adulthood in some)	1	3	2.5	15.2637	0.0645303	1	1	1	KRT5;
Hyperkeratosis of palms and soles	3	4	7.5	34.145	3.87959e-05	0.857546	0.335993	1	KRT1; CTSC; KRT10;
Hyperkeratosis of skin at nipples and umbilicus	1	1	2.5	45.4889	0.021978	1	0.960083	1	KRT1;
Hyperkeratosis of stratum corneum	2	2	5	45.4889	0.000471217	1	0.335993	1	KRT1; KRT10;
Hyperkeratosis of the palms and soles	3	5	7.5	27.3296	9.55095e-05	1	0.335993	1	KRT5; KRT1; KRT10;
Hyperkeratosis on dorsal surface of fingers and toes (knuckle pads, in some patients)	1	2	2.5	22.8576	0.0434848	1	1	1	KRT1;
Hyperkeratotic dark-brown papules	1	1	2.5	45.4889	0.021978	1	0.960083	1	KRT5;
HYPEROSTOSIS CORTICALIS GENERALISATA, BENIGN FORM OF WORTH, WITH TORUS PALATINUS	1	1	2.5	45.4889	0.021978	1	0.960083	1	LRP5;
Hyperpigmented spots	1	4	2.5	11.4573	0.085124	1	1	1	MSH2;
Hyperreflexia	3	122	7.5	1.12222	0.509353	1	1	1	ATRX; FBXO7; SLC2A1;
Hyperreflexia (type I)	1	1	2.5	45.4889	0.021978	1	0.960083	1	NEU1;
Hypertelorism	2	121	5	0.755579	0.75777	1	1	1	ATRX; PHGDH;
Hypertension	1	57	2.5	0.80589	0.72386	1	1	1	GLA;
Hypertonia	2	21	5	4.35186	0.0760534	1	1	1	PRF1; PHGDH;
Hypertonia of lower limbs, later	1	1	2.5	45.4889	0.021978	1	0.960083	1	ATRX;
Hypertriglyceridemia	1	7	2.5	6.55403	0.144288	1	1	1	PRF1;
Hypoalbuminemia	1	10	2.5	4.58979	0.199716	1	1	1	PRF1;
Hypodensity of caudate	1	1	2.5	45.4889	0.021978	1	0.960083	1	GCDH;
Hypodensity of lenticular nuclei	1	1	2.5	45.4889	0.021978	1	0.960083	1	GCDH;
Hypofibrinogenemia	1	1	2.5	45.4889	0.021978	1	0.960083	1	PRF1;
Hypogammaglobulinemia	1	9	2.5	5.0992	0.181641	1	1	1	ICOS;
Hypoglycemia	2	55	5	1.66211	0.342409	1	1	1	SUCLG1; GCDH;
Hypoglycorrhachia (low glucose in CSF)	1	1	2.5	45.4889	0.021978	1	0.960083	1	SLC2A1;
Hypogonadism	1	19	2.5	2.41682	0.345815	1	1	1	ATRX;
Hypohidrosis	1	5	2.5	9.17041	0.105275	1	1	1	GLA;
Hypomimia	1	2	2.5	22.8576	0.0434848	1	1	1	FBXO7;
Hyponatremia	1	11	2.5	4.17291	0.217402	1	1	1	PRF1;
Hypoplastic scrotum	1	7	2.5	6.55403	0.144288	1	1	1	ATRX;
Hypoproteinemia	1	4	2.5	11.4573	0.085124	1	1	1	PRF1;
Hyporeflexia	3	75	7.5	1.82538	0.226032	1	1	1	SMPD1; HDAC4; VPS13A;
Hypospadias	2	55	5	1.66211	0.342409	1	1	1	ATRX; NOTCH2;
Hypotonia	5	233	12.5	0.978067	0.595711	1	1	1	PRF1; SMPD1; GCDH; HEXA; LRP5;
Hypotonia, axial, severe	1	1	2.5	45.4889	0.021978	1	0.960083	1	SUCLG1;
Hypotonia early	1	1	2.5	45.4889	0.021978	1	0.960083	1	ATRX;
Hypotonia, early	1	1	2.5	45.4889	0.021978	1	0.960083	1	ATRX;
Hypotonia (type I and type II, infantile)	1	1	2.5	45.4889	0.021978	1	0.960083	1	NEU1;
Hypsarrhythmia or severe multifocal epileptic abnormalities with poor background activity on EEG	1	1	2.5	45.4889	0.021978	1	0.960083	1	PHGDH;
ICHTHYOSIS, CYCLIC, WITH EPIDERMOLYTIC HYPERKERATOSIS	2	2	5	45.4889	0.000471217	1	0.335993	1	KRT1; KRT10;
Ichthyosis hystrix	1	3	2.5	15.2637	0.0645303	1	1	1	KRT1;
Ichthyosis of scalp and flexural areas	2	2	5	45.4889	0.000471217	1	0.335993	1	KRT1; KRT10;
Immunology	5	148	12.5	1.53976	0.221165	1	1	1	PRF1; SMPD1; ICOS; TCN2; CFP;
Improvement with age	1	3	2.5	15.2637	0.0645303	1	1	1	KRT5;
Inability to sit or hold head up	1	1	2.5	45.4889	0.021978	1	0.960083	1	SUCLG1;
Incidence, 1 in 500 heterozygotes, 1 in 1,000,000 homozygotes	1	7	2.5	6.55403	0.144288	1	1	1	ITIH4;
Incidence of 1 in 320,000 births among non-Jewish persons	1	1	2.5	45.4889	0.021978	1	0.960083	1	HEXA;
Incidence of 1 in 3,900 births among Jewish persons	1	1	2.5	45.4889	0.021978	1	0.960083	1	HEXA;
Increased alanine aminotransferase	1	1	2.5	45.4889	0.021978	1	0.960083	1	PRF1;
Increased calvarial density	1	1	2.5	45.4889	0.021978	1	0.960083	1	LRP5;
Increased calvarial thickness	1	1	2.5	45.4889	0.021978	1	0.960083	1	LRP5;
Increased creatine kinase	1	5	2.5	9.17041	0.105275	1	1	1	VPS13A;
Increased gonial angle (AD osteosclerosis)	1	1	2.5	45.4889	0.021978	1	0.960083	1	LRP5;
Increased intracranial pressure	1	2	2.5	22.8576	0.0434848	1	1	1	PRF1;
Increased lactate in spinal fluid	1	1	2.5	45.4889	0.021978	1	0.960083	1	SUCLG1;
Increased LDL	1	1	2.5	45.4889	0.021978	1	0.960083	1	PRF1;
Increased LDL cholesterol	1	1	2.5	45.4889	0.021978	1	0.960083	1	SMPD1;
Increased level of globotriaosylceramide (GB3) in plasma and urinary sediment	1	1	2.5	45.4889	0.021978	1	0.960083	1	GLA;
Increased mandibular bone density	1	1	2.5	45.4889	0.021978	1	0.960083	1	LRP5;
Increased plasma globotriaosylsphingosine (lyso-GB3)	1	1	2.5	45.4889	0.021978	1	0.960083	1	GLA;
Increased protein in CSF	1	1	2.5	45.4889	0.021978	1	0.960083	1	PRF1;
Increased serum ferritin level	1	1	2.5	45.4889	0.021978	1	0.960083	1	PRF1;
Increased spinal bone density Z(BMD)	1	1	2.5	45.4889	0.021978	1	0.960083	1	LRP5;
Increased startle response	2	2	5	45.4889	0.000471217	1	0.335993	1	GM2A; HEXA;
Increased susceptibility to Neisseria infections	1	1	2.5	45.4889	0.021978	1	0.960083	1	CFP;
Increased tone	1	2	2.5	22.8576	0.0434848	1	1	1	SLC2A1;
Increased total bilirubin	1	1	2.5	45.4889	0.021978	1	0.960083	1	PRF1;
Increased triglycerides	1	2	2.5	22.8576	0.0434848	1	1	1	SMPD1;
Increased urinary sialylglycopeptides	1	1	2.5	45.4889	0.021978	1	0.960083	1	NEU1;
Increased urinary sialyloligosaccharides	1	1	2.5	45.4889	0.021978	1	0.960083	1	NEU1;
Increased VLDL	1	1	2.5	45.4889	0.021978	1	0.960083	1	PRF1;
Infant death may occur secondary to sepsis	1	2	2.5	22.8576	0.0434848	1	1	1	KRT5;
Infantile encephalopathy	1	1	2.5	45.4889	0.021978	1	0.960083	1	GCDH;
Infantile onset	1	1	2.5	45.4889	0.021978	1	0.960083	1	HEXA;
Infantile seizures (approximately 80% of patients)	1	1	2.5	45.4889	0.021978	1	0.960083	1	SLC2A1;
Inguinal hernia	1	44	2.5	1.04394	0.628308	1	1	1	NOTCH2;
Inguinal hernia (type II, congenital)	1	1	2.5	45.4889	0.021978	1	0.960083	1	NEU1;
Internal Genitalia (Female)	1	96	2.5	0.478531	0.888284	1	1	1	PHGDH;
Internal Genitalia (Male)	3	148	7.5	0.925083	0.644644	1	1	1	ATRX; NOTCH2; PHGDH;
Intestinal malrotation (less common)	1	1	2.5	45.4889	0.021978	1	0.960083	1	NOTCH2;
Intracellular glycosphingolipid deposition in all tissues of the body	1	1	2.5	45.4889	0.021978	1	0.960083	1	GLA;
Intracerebral cysts (in some patients)	1	4	2.5	11.4573	0.085124	1	1	1	MSH2;
Intraepidermal vesicles	2	2	5	45.4889	0.000471217	1	0.335993	1	KRT1; KRT10;
Intraocular calcification	1	1	2.5	45.4889	0.021978	1	0.960083	1	LRP5;
Inverted V-shaped upper lip	1	2	2.5	22.8576	0.0434848	1	1	1	ATRX;
Involuntary movements	1	3	2.5	15.2637	0.0645303	1	1	1	SLC2A1;
Iris atrophy	1	1	2.5	45.4889	0.021978	1	0.960083	1	LRP5;
Irritability	2	34	5	2.6884	0.170426	1	1	1	PRF1; TCN2;
Isosthenuria	1	1	2.5	45.4889	0.021978	1	0.960083	1	GLA;
Jaundice	3	28	7.5	4.88831	0.0220265	1	0.960304	1	PRF1; KRT18; KRT8;
Joint contractures	1	49	2.5	0.937437	0.668365	1	1	1	GNS;
Joint laxity	1	36	2.5	1.27586	0.554214	1	1	1	NOTCH2;
Juvenile epithelial corneal dystrophy	1	1	2.5	45.4889	0.021978	1	0.960083	1	TGFBI;
Juvenile patients have slower clinical course with preserved intellect, bulbar signs, ataxia, and spasticity	1	1	2.5	45.4889	0.021978	1	0.960083	1	GFAP;
Keratin clumping in suprabasal epidermal layers	2	2	5	45.4889	0.000471217	1	0.335993	1	KRT1; KRT10;
Keratoacanthomas	1	2	2.5	22.8576	0.0434848	1	1	1	MSH2;
Keratosis palmaris	1	2	2.5	22.8576	0.0434848	1	1	1	KRT1;
Keratosis plantaris	1	2	2.5	22.8576	0.0434848	1	1	1	KRT1;
Ketonemia	1	1	2.5	45.4889	0.021978	1	0.960083	1	GCDH;
Ketonuria	1	3	2.5	15.2637	0.0645303	1	1	1	GCDH;
Kidneys	4	276	10	0.660883	0.878333	1	1	1	ATRX; NOTCH2; PHGDH; GLA;
Kyphoscoliosis	3	34	7.5	4.02592	0.036748	1	1	1	ATRX; NOTCH2; LRP5;
Kyphoscoliosis (approximately 30%)	1	1	2.5	45.4889	0.021978	1	0.960083	1	ATRX;
Lab	6	266	15	1.02774	0.541767	1	1	1	KRT18; KRT1; GM2A; KRT8; CTSA; LIPA;
Laboratory Abnormalities	21	712	52.5	1.34229	0.0573452	1	1	1	ATRX; CLN5; PRF1; SLC2A1; SMPD1; SUCLG1; ICOS; ITIH4; TCN2; GCDH; HDAC4; GFAP; PHGDH; CFP; GNS; VPS13A; GLA; TPP1; NEU1; HEXA; LRP5;
Lack of scarring	1	2	2.5	22.8576	0.0434848	1	1	1	KRT5;
Lack of speech	1	7	2.5	6.55403	0.144288	1	1	1	GNS;
Lactic acidosis	1	58	2.5	0.791997	0.730125	1	1	1	SUCLG1;
Large ears	1	27	2.5	1.70099	0.453599	1	1	1	PHGDH;
Large irregularly shaped keratohyalin granules	1	2	2.5	22.8576	0.0434848	1	1	1	KRT1;
Large vacuolated foam cells ('NP cells') on bone marrow biopsy	1	1	2.5	45.4889	0.021978	1	0.960083	1	SMPD1;
Laryngeal carcinoma	1	2	2.5	22.8576	0.0434848	1	1	1	MSH2;
Late hypertonia	1	1	2.5	45.4889	0.021978	1	0.960083	1	HEXA;
Later onset can also occur (up to age 17 years)	1	1	2.5	45.4889	0.021978	1	0.960083	1	CLN5;
Lattice corneal dystrophy	1	3	2.5	15.2637	0.0645303	1	1	1	TGFBI;
Learning disabilities	1	6	2.5	7.64455	0.124994	1	1	1	SLC2A1;
Left ventricular septal hypertrophy	1	1	2.5	45.4889	0.021978	1	0.960083	1	GLA;
Left ventricular wall hypertrophy	1	1	2.5	45.4889	0.021978	1	0.960083	1	GLA;
Lens opacities (type II, infantile and juvenile)	1	1	2.5	45.4889	0.021978	1	0.960083	1	NEU1;
Lethargy	3	64	7.5	2.13906	0.163743	1	1	1	TCN2; KRT18; KRT8;
Lethargy, paroxysmal	1	1	2.5	45.4889	0.021978	1	0.960083	1	SLC2A1;
Leukemia	1	8	2.5	5.7358	0.163168	1	1	1	MSH2;
Leukopenia	1	15	2.5	3.06088	0.284412	1	1	1	PRF1;
Limb muscle weakness	1	2	2.5	22.8576	0.0434848	1	1	1	VPS13A;
Limb muscular atrophy	1	1	2.5	45.4889	0.021978	1	0.960083	1	VPS13A;
Limbs	6	339	15	0.806431	0.783932	1	1	1	ATRX; NOTCH2; PHGDH; GNS; NEU1; LRP5;
Limited extension of terminal joints	1	1	2.5	45.4889	0.021978	1	0.960083	1	GLA;
Lipopigment in extraneuronal cells	1	2	2.5	22.8576	0.0434848	1	1	1	TPP1;
Lissencephaly	1	4	2.5	11.4573	0.085124	1	1	1	PHGDH;
Liver	6	256	15	1.06788	0.501623	1	1	1	PRF1; SMPD1; ICOS; GCDH; GNS; NEU1;
Liver histopathology shows severe panlobular liver-cell swelling with Mallory body formation, prominent pericellular fibrosis, 'micro-micronodular' cirrhosis, and marked deposits of copper and copper-binding protein	2	2	5	45.4889	0.000471217	1	0.335993	1	KRT18; KRT8;
Localized epidermolytic hyperkeratosis	1	2	2.5	22.8576	0.0434848	1	1	1	KRT1;
Long bone deformities	1	1	2.5	45.4889	0.021978	1	0.960083	1	LRP5;
Long, bowed fibulae	1	1	2.5	45.4889	0.021978	1	0.960083	1	NOTCH2;
Long eyelashes	1	9	2.5	5.0992	0.181641	1	1	1	NOTCH2;
Long philtrum	1	54	2.5	0.850653	0.704201	1	1	1	NOTCH2;
Loss of diploe	1	1	2.5	45.4889	0.021978	1	0.960083	1	LRP5;
Low body weight	1	2	2.5	22.8576	0.0434848	1	1	1	SMPD1;
Low nasal bridge	1	20	2.5	2.29604	0.360345	1	1	1	ATRX;
Low-set ears	3	97	7.5	1.41142	0.360124	1	1	1	ATRX; NOTCH2; GNS;
Low-to-normal CSF lactate	1	1	2.5	45.4889	0.021978	1	0.960083	1	SLC2A1;
Lung	4	171	10	1.06667	0.527277	1	1	1	SMPD1; ICOS; PHGDH; GLA;
Lymphadenopathy	3	13	7.5	10.5243	0.00241614	1	0.960083	1	PRF1; SMPD1; ICOS;
Lymphedema	1	3	2.5	15.2637	0.0645303	1	1	1	GLA;
Lymphoma	1	9	2.5	5.0992	0.181641	1	1	1	MSH2;
LYNCH SYNDROME I	1	1	2.5	45.4889	0.021978	1	0.960083	1	MSH2;
LYSOSOMAL ACID LIPASE DEFICIENCY	1	1	2.5	45.4889	0.021978	1	0.960083	1	LIPA;
Macrocephaly	1	60	2.5	0.765602	0.742243	1	1	1	GCDH;
Macrocytic anemia	1	1	2.5	45.4889	0.021978	1	0.960083	1	TCN2;
Macrostomia	1	9	2.5	5.0992	0.181641	1	1	1	ATRX;
Macular ectopia	1	2	2.5	22.8576	0.0434848	1	1	1	LRP5;
Macular pallor with prominence of fovea centralis (cherry red spot)	1	1	2.5	45.4889	0.021978	1	0.960083	1	HEXA;
Malignant gastrointestinal tract tumors	1	2	2.5	22.8576	0.0434848	1	1	1	MSH2;
Malignant genitourinary tract tumors	1	2	2.5	22.8576	0.0434848	1	1	1	MSH2;
Malocclusion	2	15	5	6.09145	0.0412902	1	1	1	NOTCH2; LRP5;
Mandibular hypoplasia	1	9	2.5	5.0992	0.181641	1	1	1	POLR1C;
Map-dot-fingerprint corneal dystrophy	1	1	2.5	45.4889	0.021978	1	0.960083	1	TGFBI;
Markedly reduced IgA levels	1	2	2.5	22.8576	0.0434848	1	1	1	ICOS;
Markedly reduced IgG levels	1	2	2.5	22.8576	0.0434848	1	1	1	ICOS;
May have seasonal variance in severity	1	1	2.5	45.4889	0.021978	1	0.960083	1	KRT5;
Medulloblastoma	1	11	2.5	4.17291	0.217402	1	1	1	MSH2;
Megaloblastic anemia	1	11	2.5	4.17291	0.217402	1	1	1	PHGDH;
Megaloblastic bone marrow	1	1	2.5	45.4889	0.021978	1	0.960083	1	TCN2;
Meningitis	1	9	2.5	5.0992	0.181641	1	1	1	PRF1;
Mental retardation	9	200	22.5	2.04917	0.0256119	1	1	1	ATRX; CLN5; NUP62; SLC2A1; SMPD1; HDAC4; PHGDH; CTSA; GNS;
Mental retardation (if untreated)	1	3	2.5	15.2637	0.0645303	1	1	1	TCN2;
Mental retardation, mild	1	11	2.5	4.17291	0.217402	1	1	1	LRP5;
Mental retardation, moderate to severe (type II, infantile and juvenile)	1	1	2.5	45.4889	0.021978	1	0.960083	1	NEU1;
Mental retardation, severe	1	17	2.5	2.70099	0.315785	1	1	1	SUCLG1;
Mental retardation, severe, profound	1	1	2.5	45.4889	0.021978	1	0.960083	1	ATRX;
Metabolic acidosis	1	30	2.5	1.53095	0.489377	1	1	1	GCDH;
Metabolic Features	1	195	2.5	0.235597	0.9898	1	1	1	SUCLG1;
Metacarpal diaphyseal endosteal sclerosis	1	1	2.5	45.4889	0.021978	1	0.960083	1	LRP5;
Metachromasia of white blood cells and fibroblasts	1	2	2.5	22.8576	0.0434848	1	1	1	GNS;
Metatarsal diaphyseal endosteal sclerosis	1	1	2.5	45.4889	0.021978	1	0.960083	1	LRP5;
Methylmalonic aciduria	2	8	5	11.4148	0.0121322	1	0.960083	1	SUCLG1; TCN2;
Microcephaly	3	129	7.5	1.06132	0.548227	1	1	1	ATRX; PHGDH; LRP5;
Microcephaly, acquired	1	1	2.5	45.4889	0.021978	1	0.960083	1	SLC2A1;
Microcephaly, congenital	1	2	2.5	22.8576	0.0434848	1	1	1	PHGDH;
Microcytic anemia	1	3	2.5	15.2637	0.0645303	1	1	1	SMPD1;
Micrognathia	3	121	7.5	1.13149	0.50367	1	1	1	ATRX; NOTCH2; PHGDH;
Micropenis	1	21	2.5	2.18676	0.374559	1	1	1	ATRX;
Microphthalmia	2	37	5	2.47048	0.194386	1	1	1	PHGDH; LRP5;
Microtia Hearing loss, conductive	1	1	2.5	45.4889	0.021978	1	0.960083	1	POLR1C;
Midface hypoplasia	2	38	5	2.40549	0.202475	1	1	1	ATRX; HDAC4;
Mid-face hypoplasia	1	1	2.5	45.4889	0.021978	1	0.960083	1	ATRX;
Migraine	1	5	2.5	9.17041	0.105275	1	1	1	SLC2A1;
Migratory plaques of thickened, sharply demarcated erythema and hyperkeratosis	2	2	5	45.4889	0.000471217	1	0.335993	1	KRT1; KRT10;
Mild clavicular sclerosis	1	1	2.5	45.4889	0.021978	1	0.960083	1	LRP5;
Mild dysotosis multiplex	1	1	2.5	45.4889	0.021978	1	0.960083	1	GNS;
Mild form of hemoglobin H (Hb H) disease	1	1	2.5	45.4889	0.021978	1	0.960083	1	ATRX;
Mild hepatomegaly	1	6	2.5	7.64455	0.124994	1	1	1	GNS;
Mild hypochromic microcytic anemia	1	1	2.5	45.4889	0.021978	1	0.960083	1	ATRX;
Mild joint stiffness	1	4	2.5	11.4573	0.085124	1	1	1	GNS;
Mild obstructive lung disease	1	1	2.5	45.4889	0.021978	1	0.960083	1	GLA;
Mild rib sclerosis	1	1	2.5	45.4889	0.021978	1	0.960083	1	LRP5;
Mild sclerosis	1	1	2.5	45.4889	0.021978	1	0.960083	1	LRP5;
Mild splenomegaly	1	5	2.5	9.17041	0.105275	1	1	1	GNS;
Mild vertebral body sclerosis	1	1	2.5	45.4889	0.021978	1	0.960083	1	LRP5;
Milia	1	11	2.5	4.17291	0.217402	1	1	1	KRT5;
Milia (less common)	1	2	2.5	22.8576	0.0434848	1	1	1	KRT5;
Milia (rare)	1	3	2.5	15.2637	0.0645303	1	1	1	KRT5;
Misc	5	219	12.5	1.04059	0.537146	1	1	1	MSH2; TGFBI; KRT18; KRT8; LIPA;
Miscellaneous	28	1228	70	1.03757	0.438295	1	1	1	ATRX; CLN5; FBXO7; NUP62; SLC2A1; SMPD1; SUCLG1; TSG101; MSH2; ICOS; ITIH4; TCN2; GCDH; HDAC4; TGFBI; GFAP; PHGDH; KRT5; CFP; GNS; VPS13A; IL1B; GLA; TPP1; NEU1; CTSC; HEXA; LRP5;
Mitochondrial DNA depletion	1	3	2.5	15.2637	0.0645303	1	1	1	SUCLG1;
Mitral valvular disease	1	1	2.5	45.4889	0.021978	1	0.960083	1	CTSA;
Monotone speech	1	1	2.5	45.4889	0.021978	1	0.960083	1	FBXO7;
Mood changes	1	2	2.5	22.8576	0.0434848	1	1	1	VPS13A;
More common in Ashkenazi Jews	1	1	2.5	45.4889	0.021978	1	0.960083	1	SMPD1;
Motor deterioration	1	4	2.5	11.4573	0.085124	1	1	1	CLN5;
Mottled' pigmentation of the trunk and proximal extremities	1	1	2.5	45.4889	0.021978	1	0.960083	1	KRT5;
Mouth	10	417	25	1.09193	0.436471	1	1	1	ATRX; POLR1C; NOTCH2; TCN2; PHGDH; KRT5; GNS; IL1B; CTSC; LRP5;
Mucosal ulceration	1	1	2.5	45.4889	0.021978	1	0.960083	1	TCN2;
Multiple organs (lung, liver, spleen, kidney, brain) contain foamy resident cells and histiocytes	1	1	2.5	45.4889	0.021978	1	0.960083	1	SMPD1;
Multiple visceral organs (lung, liver, spleen, kidney) contain foamy resident cells and histiocytes	1	1	2.5	45.4889	0.021978	1	0.960083	1	SMPD1;
Muscle atrophy	1	39	2.5	1.17774	0.583548	1	1	1	SUCLG1;
Muscle atrophy (type I)	1	1	2.5	45.4889	0.021978	1	0.960083	1	NEU1;
Muscle cramps	1	17	2.5	2.70099	0.315785	1	1	1	GLA;
Muscle, Soft Tissue	6	341	15	0.801701	0.789029	1	1	1	PRF1; SUCLG1; TCN2; VPS13A; GLA; NEU1;
Muscle weakness	1	62	2.5	0.740909	0.753829	1	1	1	SMPD1;
Muscle weakness (type I)	1	1	2.5	45.4889	0.021978	1	0.960083	1	NEU1;
Myocardial infarction	1	9	2.5	5.0992	0.181641	1	1	1	GLA;
Myoclonic astatic epilepsy	1	1	2.5	45.4889	0.021978	1	0.960083	1	SLC2A1;
Myoclonus	2	31	5	2.94849	0.147061	1	1	1	CLN5; TPP1;
Myoclonus, paroxysmal	1	1	2.5	45.4889	0.021978	1	0.960083	1	SLC2A1;
Myoclonus (type I and type II, infantile and juvenile)	1	1	2.5	45.4889	0.021978	1	0.960083	1	NEU1;
N-acetylglucosamine-6-sulfate sulfatase deficiency	1	1	2.5	45.4889	0.021978	1	0.960083	1	GNS;
Nails	5	123	12.5	1.85269	0.128409	1	1	1	NOTCH2; KRT5; KRT1; CTSC; KRT10;
Nail shedding	1	2	2.5	22.8576	0.0434848	1	1	1	KRT5;
Narrow diaphyses	1	1	2.5	45.4889	0.021978	1	0.960083	1	LRP5;
Narrow disc space	1	1	2.5	45.4889	0.021978	1	0.960083	1	NOTCH2;
Nasopharynx	1	34	2.5	1.35089	0.533548	1	1	1	GNS;
Nausea	1	10	2.5	4.58979	0.199716	1	1	1	GLA;
NAXOS DISEASE	1	1	2.5	45.4889	0.021978	1	0.960083	1	JUP;
Neck	5	130	12.5	1.75294	0.152218	1	1	1	ATRX; NOTCH2; PHGDH; GNS; VPS13A;
Neck flexion, intermittent	1	1	2.5	45.4889	0.021978	1	0.960083	1	VPS13A;
Neonatal ascites (type II, congenital)	1	1	2.5	45.4889	0.021978	1	0.960083	1	NEU1;
Neonatal blisters and erosions	2	2	5	45.4889	0.000471217	1	0.335993	1	KRT1; KRT10;
Neonatal jaundice	1	4	2.5	11.4573	0.085124	1	1	1	SMPD1;
Neoplasia	3	151	7.5	0.906705	0.658547	1	1	1	TSG101; MSH2; IL1B;
Neovascularization	1	1	2.5	45.4889	0.021978	1	0.960083	1	LRP5;
NEURAMINIDASE DEFICIENCY	1	1	2.5	45.4889	0.021978	1	0.960083	1	NEU1;
Neuraminidase deficiency (white blood cells, fibroblasts, cultured amniotic cells)	1	1	2.5	45.4889	0.021978	1	0.960083	1	NEU1;
Neuro	4	132	10	1.38179	0.329212	1	1	1	KRT18; GM2A; KRT8; CTSA;
Neuroblastoma	1	11	2.5	4.17291	0.217402	1	1	1	MSH2;
Neurologic	23	930	57.5	1.12547	0.255408	1	1	1	ATRX; CLN5; FBXO7; NUP62; PRF1; SLC2A1; SMPD1; SUCLG1; MSH2; NOTCH2; TCN2; GCDH; HDAC4; GFAP; PHGDH; GNS; VPS13A; GLA; TPP1; NEU1; CTSC; HEXA; LRP5;
Neurologic dysfunction is infrequent and associated with delayed diagnosis	1	1	2.5	45.4889	0.021978	1	0.960083	1	TCN2;
Neurologic findings closely resemble those of Huntington disease (HD,	1	1	2.5	45.4889	0.021978	1	0.960083	1	VPS13A;
Neurophysiologic abnormalities (EEG, VEP, SEP)	2	2	5	45.4889	0.000471217	1	0.335993	1	CLN5; TPP1;
Neutropenia	1	20	2.5	2.29604	0.360345	1	1	1	TCN2;
NIEMANN-PICK DISEASE, TYPE A	1	1	2.5	45.4889	0.021978	1	0.960083	1	SMPD1;
NIEMANN-PICK DISEASE, TYPE B	1	1	2.5	45.4889	0.021978	1	0.960083	1	SMPD1;
No abnormal keratohyalin granules	1	1	2.5	45.4889	0.021978	1	0.960083	1	KRT1;
No aggregated tonofilaments	1	1	2.5	45.4889	0.021978	1	0.960083	1	KRT1;
No clumping of keratin filaments in basal epidermal cells	1	2	2.5	22.8576	0.0434848	1	1	1	KRT5;
No cytolysis	1	1	2.5	45.4889	0.021978	1	0.960083	1	KRT1;
No endobones	1	1	2.5	45.4889	0.021978	1	0.960083	1	LRP5;
No increased fracture rate	1	1	2.5	45.4889	0.021978	1	0.960083	1	LRP5;
No large keratohyalin granules	1	1	2.5	45.4889	0.021978	1	0.960083	1	KRT1;
Non-malignant mixed lymphohistiocytic infiltration of the reticuloendothelial system	1	1	2.5	45.4889	0.021978	1	0.960083	1	PRF1;
Nonpolyposis colon cancer	1	1	2.5	45.4889	0.021978	1	0.960083	1	MSH2;
No palmoplantar keratosis	1	1	2.5	45.4889	0.021978	1	0.960083	1	CTSC;
Normal	2	4	5	22.8012	0.00274911	1	0.960083	1	KRT1; KRT10;
Normal alkaline phosphatase	1	1	2.5	45.4889	0.021978	1	0.960083	1	LRP5;
Normal G(s)-alpha levels (	1	1	2.5	45.4889	0.021978	1	0.960083	1	HDAC4;
Normal height	1	5	2.5	9.17041	0.105275	1	1	1	LRP5;
Normal intelligence	1	45	2.5	1.02075	0.63668	1	1	1	NOTCH2;
Normal intelligence in most cases	1	1	2.5	45.4889	0.021978	1	0.960083	1	LRP5;
Normal numbers of T cells	1	2	2.5	22.8576	0.0434848	1	1	1	ICOS;
Normal or reduced numbers of B cells	1	1	2.5	45.4889	0.021978	1	0.960083	1	ICOS;
Normal serum acid phosphatase	1	1	2.5	45.4889	0.021978	1	0.960083	1	LRP5;
Normal serum cobalamin	1	3	2.5	15.2637	0.0645303	1	1	1	TCN2;
Normal serum folate	1	1	2.5	45.4889	0.021978	1	0.960083	1	TCN2;
Normal serum lipoprotein levels	1	1	2.5	45.4889	0.021978	1	0.960083	1	VPS13A;
Normal stature	1	4	2.5	11.4573	0.085124	1	1	1	GNS;
Normal-to-decreased plasma glycine (fasting)	1	1	2.5	45.4889	0.021978	1	0.960083	1	PHGDH;
No 'rugger-jersey spine'	1	1	2.5	45.4889	0.021978	1	0.960083	1	LRP5;
Nose	5	314	12.5	0.725771	0.846177	1	1	1	ATRX; NOTCH2; HDAC4; PHGDH; GNS;
Nutritional failure	1	1	2.5	45.4889	0.021978	1	0.960083	1	LIPA;
Nystagmus	1	122	2.5	0.376557	0.939595	1	1	1	PHGDH;
Nystagmus, pendular	1	3	2.5	15.2637	0.0645303	1	1	1	NUP62;
Nystagmus (type I)	1	1	2.5	45.4889	0.021978	1	0.960083	1	NEU1;
Obesity	1	43	2.5	1.06821	0.619749	1	1	1	HDAC4;
Obesity, mild (rare)	1	1	2.5	45.4889	0.021978	1	0.960083	1	ATRX;
Occasional degeneration of the globus pallidus	1	1	2.5	45.4889	0.021978	1	0.960083	1	NUP62;
Occurs in at least 1 in 55,000 male births (that figure may not include milder variants)	1	1	2.5	45.4889	0.021978	1	0.960083	1	GLA;
Oligodendroglioma	1	4	2.5	11.4573	0.085124	1	1	1	MSH2;
Oncology	1	80	2.5	0.574225	0.837659	1	1	1	MSH2;
Onset 7 to 15 months of age	1	1	2.5	45.4889	0.021978	1	0.960083	1	NUP62;
Onset after puberty	1	1	2.5	45.4889	0.021978	1	0.960083	1	KRT5;
Onset at 2 to 15 years	1	1	2.5	45.4889	0.021978	1	0.960083	1	SLC2A1;
Onset at 2 to 4 years	1	1	2.5	45.4889	0.021978	1	0.960083	1	TPP1;
Onset at 4 to 7 years	1	1	2.5	45.4889	0.021978	1	0.960083	1	CLN5;
Onset at birth	1	27	2.5	1.70099	0.453599	1	1	1	HDAC4;
Onset at birth or early childhood	1	3	2.5	15.2637	0.0645303	1	1	1	KRT5;
Onset at birth or in early infancy	1	5	2.5	9.17041	0.105275	1	1	1	KRT5;
Onset in adolescence or young adulthood	1	1	2.5	45.4889	0.021978	1	0.960083	1	FBXO7;
Onset in childhood of blistering and pigmentary changes	1	1	2.5	45.4889	0.021978	1	0.960083	1	KRT5;
Onset in early childhood or adolescence	1	3	2.5	15.2637	0.0645303	1	1	1	KRT5;
Onset in infancy	3	82	7.5	1.66957	0.267926	1	1	1	SLC2A1; SMPD1; SUCLG1;
Onset in infancy or childhood	1	7	2.5	6.55403	0.144288	1	1	1	SMPD1;
Onset in infancy or early childhood	1	25	2.5	1.83702	0.4284	1	1	1	LRP5;
Onset in teens has been reported	1	4	2.5	11.4573	0.085124	1	1	1	IL1B;
Onset of bone fragility in childhood	1	1	2.5	45.4889	0.021978	1	0.960083	1	LRP5;
Onset of disease in late childhood	1	1	2.5	45.4889	0.021978	1	0.960083	1	LRP5;
Onset of gastrointestinal tumors typically occurs in the second decade	1	4	2.5	11.4573	0.085124	1	1	1	MSH2;
Onset of hematologic or CNS tumors in the first or second decades of life	1	4	2.5	11.4573	0.085124	1	1	1	MSH2;
Onset of illness often associated with acute infection	1	1	2.5	45.4889	0.021978	1	0.960083	1	GCDH;
Onset usually in childhood or adolescence	1	5	2.5	9.17041	0.105275	1	1	1	GLA;
Onychogryposis	1	3	2.5	15.2637	0.0645303	1	1	1	CTSC;
Open mouth	1	9	2.5	5.0992	0.181641	1	1	1	ATRX;
Opisthotonus	1	9	2.5	5.0992	0.181641	1	1	1	GCDH;
Optic atrophy	2	82	5	1.1149	0.54588	1	1	1	ATRX; NUP62;
Oral blistering	1	2	2.5	22.8576	0.0434848	1	1	1	KRT5;
Orofacial dyskinesia	1	5	2.5	9.17041	0.105275	1	1	1	VPS13A;
Osteopenia	1	28	2.5	1.64026	0.465788	1	1	1	NOTCH2;
Osteoporosis	2	42	5	2.17645	0.235193	1	1	1	SMPD1; NOTCH2;
OSTEOPOROSIS	1	6	2.5	7.64455	0.124994	1	1	1	LRP5;
Osteoporosis (onset in childhood)	1	1	2.5	45.4889	0.021978	1	0.960083	1	LRP5;
Other	11	384	27.5	1.30422	0.206006	1	1	1	ATRX; NUP62; PRF1; SMPD1; SUCLG1; NOTCH2; TCN2; GCDH; PHGDH; KRT5; GLA;
Other tumors may also occur	1	4	2.5	11.4573	0.085124	1	1	1	MSH2;
Otitis media, recurrent	1	3	2.5	15.2637	0.0645303	1	1	1	ICOS;
Overproduction by T lymphocytes and macrophages of cytokines, particularly interferon gamma and tumor necrosis factor alpha	1	1	2.5	45.4889	0.021978	1	0.960083	1	PRF1;
Ovoid thoracolumbar vertebrae	1	4	2.5	11.4573	0.085124	1	1	1	GNS;
Pain and paresthesia in the extremities, episodic	1	1	2.5	45.4889	0.021978	1	0.960083	1	GLA;
Painful crises precipitated by exercise, fatigue, or stress	1	1	2.5	45.4889	0.021978	1	0.960083	1	GLA;
Pain insensitivity	1	2	2.5	22.8576	0.0434848	1	1	1	HDAC4;
Palmoplantar epidermolytic hyperkeratosis along Blaschko lines (rare)	1	2	2.5	22.8576	0.0434848	1	1	1	KRT1;
Palmoplantar keratoderma	1	7	2.5	6.55403	0.144288	1	1	1	JUP;
Pancytopenia	1	14	2.5	3.27936	0.268204	1	1	1	TCN2;
Paresthesias	1	14	2.5	3.27936	0.268204	1	1	1	SLC2A1;
Parkinsonism	2	42	5	2.17645	0.235193	1	1	1	FBXO7; VPS13A;
Paroxysmal bursts of laughter	1	1	2.5	45.4889	0.021978	1	0.960083	1	ATRX;
Patent ductus arteriosus	2	41	5	2.22952	0.22697	1	1	1	NOTCH2; PHGDH;
Patent foramen ovale	1	4	2.5	11.4573	0.085124	1	1	1	PHGDH;
Pathologic fractures	1	11	2.5	4.17291	0.217402	1	1	1	NOTCH2;
Pelvis	2	153	5	0.59756	0.863618	1	1	1	ATRX; LRP5;
Penetrance of 70 to 80% over a lifetime in heterozygous mutation carriers	1	4	2.5	11.4573	0.085124	1	1	1	IL1B;
Perimembranous ventricular septal defect	1	1	2.5	45.4889	0.021978	1	0.960083	1	ATRX;
Perinuclear vacuolization of keratinocytes	1	2	2.5	22.8576	0.0434848	1	1	1	KRT1;
PERIODONTITIS, AGGRESSIVE, 1	1	1	2.5	45.4889	0.021978	1	0.960083	1	CTSC;
Periodontium is less severely affected than in Papillon-Lefevre syndrome	1	1	2.5	45.4889	0.021978	1	0.960083	1	CTSC;
Periosteal cloaking (type II, congenital)	1	1	2.5	45.4889	0.021978	1	0.960083	1	NEU1;
Peripheral Nervous System	4	178	10	1.02472	0.560479	1	1	1	SLC2A1; HDAC4; VPS13A; GLA;
Peripheral retinal avascularization	1	2	2.5	22.8576	0.0434848	1	1	1	LRP5;
Personality changes	1	16	2.5	2.86969	0.30027	1	1	1	VPS13A;
Pes cavus	1	58	2.5	0.791997	0.730125	1	1	1	VPS13A;
Pes equinovarus	1	3	2.5	15.2637	0.0645303	1	1	1	FBXO7;
Pes planus	2	37	5	2.47048	0.194386	1	1	1	ATRX; CTSC;
Phenotypic overlap with Albright hereditary osteodystrophy (AHO,	1	1	2.5	45.4889	0.021978	1	0.960083	1	HDAC4;
Phenotypic variability	1	11	2.5	4.17291	0.217402	1	1	1	SLC2A1;
PHOSPHOGLYCERATE DEHYDROGENASE DEFICIENCY	1	1	2.5	45.4889	0.021978	1	0.960083	1	PHGDH;
Phthisis bulbi	1	3	2.5	15.2637	0.0645303	1	1	1	LRP5;
Pitted, perioral acneiform scars	1	1	2.5	45.4889	0.021978	1	0.960083	1	KRT5;
Planar xanthomas in homozygotes	1	7	2.5	6.55403	0.144288	1	1	1	ITIH4;
Platyspondyly	1	26	2.5	1.76639	0.441138	1	1	1	LRP5;
Pneumonia, recurrent	1	2	2.5	22.8576	0.0434848	1	1	1	ICOS;
Polymorphic geographic deposits at Bowman's layer	1	1	2.5	45.4889	0.021978	1	0.960083	1	TGFBI;
Poor growth	1	27	2.5	1.70099	0.453599	1	1	1	SUCLG1;
Poor head control	1	2	2.5	22.8576	0.0434848	1	1	1	HEXA;
Poorly mineralized bones	1	1	2.5	45.4889	0.021978	1	0.960083	1	PHGDH;
Poor weight gain	1	4	2.5	11.4573	0.085124	1	1	1	LIPA;
Posteriorly rotated ears	1	32	2.5	1.43529	0.51195	1	1	1	ATRX;
Postmenopausal osteoporosis	1	6	2.5	7.64455	0.124994	1	1	1	LRP5;
Postnatal growth deficiency	1	7	2.5	6.55403	0.144288	1	1	1	ATRX;
Postural instability	1	14	2.5	3.27936	0.268204	1	1	1	FBXO7;
Premature tooth	1	1	2.5	45.4889	0.021978	1	0.960083	1	CTSC;
Premature tooth loss	1	2	2.5	22.8576	0.0434848	1	1	1	CTSC;
Premature tooth loss (both primary and secondary dentition)	1	1	2.5	45.4889	0.021978	1	0.960083	1	CTSC;
Prenatal Manifestations	1	115	2.5	0.399476	0.928653	1	1	1	NEU1;
Prenatal onset growth retardation	1	2	2.5	22.8576	0.0434848	1	1	1	PHGDH;
Presence of glial fibrillary acidic proteins (GFAP) in astrocytes	1	1	2.5	45.4889	0.021978	1	0.960083	1	GFAP;
Presence of Rosenthal fibers (cytoplasmic inclusions) in astrocytes	1	1	2.5	45.4889	0.021978	1	0.960083	1	GFAP;
Presence of Rosenthal fibers (eosinophilic bodies near astrocyte filaments)	1	1	2.5	45.4889	0.021978	1	0.960083	1	GFAP;
Presentation at 3-6 weeks of age	1	1	2.5	45.4889	0.021978	1	0.960083	1	TCN2;
Prevalent in Old Order Amish of Lancaster County, Pennsylvania and Saulteaux/Ojibway Indians of Canada	1	1	2.5	45.4889	0.021978	1	0.960083	1	GCDH;
'Primary' pulmonary hypertension	2	2	5	45.4889	0.000471217	1	0.335993	1	KRT18; KRT8;
Progressive basilar impression	1	1	2.5	45.4889	0.021978	1	0.960083	1	NOTCH2;
Progressive choreoathetosis	1	1	2.5	45.4889	0.021978	1	0.960083	1	VPS13A;
Progressive disorder	2	69	5	1.32492	0.452803	1	1	1	GNS; VPS13A;
Progressive macrocephaly	1	2	2.5	22.8576	0.0434848	1	1	1	GFAP;
Progressive reticulate hyperpigmentation (axillae, groin, perineal, perianal)	1	1	2.5	45.4889	0.021978	1	0.960083	1	KRT5;
Progressive sclerosis with age	1	2	2.5	22.8576	0.0434848	1	1	1	LRP5;
Progressive, symmetric degeneration of the caudate and putamen	1	1	2.5	45.4889	0.021978	1	0.960083	1	NUP62;
Progressive visual impairment, mild	1	1	2.5	45.4889	0.021978	1	0.960083	1	TGFBI;
Prolonged prothrombin time	1	4	2.5	11.4573	0.085124	1	1	1	PRF1;
Prominent ear lobes	1	1	2.5	45.4889	0.021978	1	0.960083	1	NOTCH2;
Prominent forehead	1	36	2.5	1.27586	0.554214	1	1	1	GNS;
Prominent lower lip	1	4	2.5	11.4573	0.085124	1	1	1	ATRX;
Pronounced calvarial sclerosis	1	1	2.5	45.4889	0.021978	1	0.960083	1	LRP5;
Proteinuria	1	48	2.5	0.956962	0.660706	1	1	1	GLA;
Proteinuria (type II, congenital)	1	1	2.5	45.4889	0.021978	1	0.960083	1	NEU1;
Protruding eyes	1	3	2.5	15.2637	0.0645303	1	1	1	PHGDH;
Protruding tongue	1	8	2.5	5.7358	0.163168	1	1	1	ATRX;
Protuberant abdomen	1	8	2.5	5.7358	0.163168	1	1	1	SMPD1;
Proximally placed fourth toe	1	1	2.5	45.4889	0.021978	1	0.960083	1	HDAC4;
Pseudoclubbing	1	1	2.5	45.4889	0.021978	1	0.960083	1	NOTCH2;
Pseudoglioma	1	1	2.5	45.4889	0.021978	1	0.960083	1	LRP5;
Psychomotor degeneration	1	3	2.5	15.2637	0.0645303	1	1	1	HEXA;
Psychomotor regression	1	20	2.5	2.29604	0.360345	1	1	1	GFAP;
Psychomotor retardation	1	42	2.5	1.09364	0.610997	1	1	1	SMPD1;
Psychosis	1	26	2.5	1.76639	0.441138	1	1	1	VPS13A;
Pterygia	1	1	2.5	45.4889	0.021978	1	0.960083	1	PHGDH;
Ptosis	1	107	2.5	0.429341	0.913774	1	1	1	ATRX;
Puffiness of feet	1	1	2.5	45.4889	0.021978	1	0.960083	1	PHGDH;
Puffiness of hands	1	1	2.5	45.4889	0.021978	1	0.960083	1	PHGDH;
Pulmonary	1	21	2.5	2.18676	0.374559	1	1	1	LIPA;
Pulmonary hypertension	1	11	2.5	4.17291	0.217402	1	1	1	LIPA;
Pulmonary hypoplasia	1	18	2.5	2.55101	0.330964	1	1	1	PHGDH;
Punctate palmoplantar hyperkeratosis (later onset)	1	1	2.5	45.4889	0.021978	1	0.960083	1	KRT5;
Purpuric rashes	1	1	2.5	45.4889	0.021978	1	0.960083	1	PRF1;
Putamen atrophy	1	1	2.5	45.4889	0.021978	1	0.960083	1	VPS13A;
Pyramidal signs	2	23	5	3.9736	0.0891607	1	1	1	FBXO7; SLC2A1;
Radiology	1	28	2.5	1.64026	0.465788	1	1	1	LIPA;
Ragged red fibers	1	4	2.5	11.4573	0.085124	1	1	1	SUCLG1;
Rectilinear' profiles ultrastructurally	1	2	2.5	22.8576	0.0434848	1	1	1	CLN5;
Recurrent bacterial infections	1	8	2.5	5.7358	0.163168	1	1	1	ICOS;
Recurrent corneal ulceration	1	1	2.5	45.4889	0.021978	1	0.960083	1	TGFBI;
Recurrent erosions uncommon	1	1	2.5	45.4889	0.021978	1	0.960083	1	TGFBI;
Recurrent pyogenic skin infections	1	1	2.5	45.4889	0.021978	1	0.960083	1	CTSC;
Reduced erythrocyte glucose/hexose transport	1	1	2.5	45.4889	0.021978	1	0.960083	1	SLC2A1;
Reduced IgM levels	1	3	2.5	15.2637	0.0645303	1	1	1	ICOS;
Reduced Natural Killer cell cytotoxicity	1	1	2.5	45.4889	0.021978	1	0.960083	1	PRF1;
Reduced T cell cytotoxicity	1	1	2.5	45.4889	0.021978	1	0.960083	1	PRF1;
Reduced unsaturated serum cobalamin binding capacity	1	1	2.5	45.4889	0.021978	1	0.960083	1	TCN2;
Reduced upgaze	1	1	2.5	45.4889	0.021978	1	0.960083	1	FBXO7;
Reduced visual acuity	1	5	2.5	9.17041	0.105275	1	1	1	TGFBI;
Renal agenesis	2	14	5	6.52624	0.0362819	1	1	1	ATRX; PHGDH;
Renal biopsy shows glomerular sclerosis	1	1	2.5	45.4889	0.021978	1	0.960083	1	GLA;
Renal cysts	1	11	2.5	4.17291	0.217402	1	1	1	NOTCH2;
Renal failure	1	37	2.5	1.24139	0.564209	1	1	1	GLA;
Renal hypoplasia (less common)	1	1	2.5	45.4889	0.021978	1	0.960083	1	ATRX;
Repetitive behaviors	1	2	2.5	22.8576	0.0434848	1	1	1	HDAC4;
Repetitive, self-stimulatory behavior using upper limbs	1	1	2.5	45.4889	0.021978	1	0.960083	1	ATRX;
Resistance of bone to fractures	1	1	2.5	45.4889	0.021978	1	0.960083	1	LRP5;
Resp	1	22	2.5	2.0874	0.388466	1	1	1	GM2A;
Respiratory	7	360	17.5	0.885745	0.704917	1	1	1	SMPD1; SUCLG1; ICOS; PHGDH; GNS; GLA; HEXA;
Respiratory failure	1	42	2.5	1.09364	0.610997	1	1	1	SUCLG1;
Respiratory insufficiency	1	35	2.5	1.3123	0.543995	1	1	1	SUCLG1;
Retarded growth	1	2	2.5	22.8576	0.0434848	1	1	1	GLA;
Reticulate acropigmentation of Kitamura (hyperpigmentation found primarily in hands and feet)	1	1	2.5	45.4889	0.021978	1	0.960083	1	KRT5;
Reticulocytopenia	1	2	2.5	22.8576	0.0434848	1	1	1	TCN2;
Retinal degeneration	2	13	5	7.02787	0.0315314	1	1	1	CLN5; TPP1;
Retinal exudates	1	3	2.5	15.2637	0.0645303	1	1	1	LRP5;
Rhabdomyosarcoma	1	9	2.5	5.0992	0.181641	1	1	1	MSH2;
Ribs, Sternum, Clavicles and Scapulae	2	162	5	0.564364	0.884855	1	1	1	GNS; LRP5;
Ridged nails	1	2	2.5	22.8576	0.0434848	1	1	1	KRT5;
Rigidity	2	28	5	3.26429	0.124478	1	1	1	FBXO7; GCDH;
Rigidity (later)	1	1	2.5	45.4889	0.021978	1	0.960083	1	SMPD1;
Round face	1	12	2.5	3.82546	0.234707	1	1	1	HDAC4;
Round, gaping mouth	1	1	2.5	45.4889	0.021978	1	0.960083	1	PHGDH;
Scaly skin	2	2	5	45.4889	0.000471217	1	0.335993	1	KRT1; KRT10;
Scissor gait	1	1	2.5	45.4889	0.021978	1	0.960083	1	FBXO7;
Sea blue' histiocytes	1	1	2.5	45.4889	0.021978	1	0.960083	1	SMPD1;
Sebaceous adenomas	1	2	2.5	22.8576	0.0434848	1	1	1	MSH2;
Sebaceous carcinoma	1	2	2.5	22.8576	0.0434848	1	1	1	MSH2;
Sebaceous epitheliomas	1	2	2.5	22.8576	0.0434848	1	1	1	MSH2;
Sebaceous gland tumors	1	2	2.5	22.8576	0.0434848	1	1	1	MSH2;
See also GLUT1DS2 (	1	1	2.5	45.4889	0.021978	1	0.960083	1	SLC2A1;
Seizures (1 patient)	1	4	2.5	11.4573	0.085124	1	1	1	HDAC4;
Seizures	9	275	22.5	1.49033	0.137494	1	1	1	CLN5; PRF1; GFAP; PHGDH; GNS; VPS13A; GLA; TPP1; HEXA;
Seizures, generalized tonic/clonic, myoclonic, atonic, or atypical absence, aggravated by fatigue and fasting with frequency ranges from daily to monthly (in some patients)	1	1	2.5	45.4889	0.021978	1	0.960083	1	SLC2A1;
Seizures (in 35%)	1	1	2.5	45.4889	0.021978	1	0.960083	1	ATRX;
Seizures (less common)	1	10	2.5	4.58979	0.199716	1	1	1	GCDH;
Seizures (type I and type II, juvenile)	1	1	2.5	45.4889	0.021978	1	0.960083	1	NEU1;
Self-absorbed	1	1	2.5	45.4889	0.021978	1	0.960083	1	ATRX;
Self-injurious behavior	1	3	2.5	15.2637	0.0645303	1	1	1	HDAC4;
Self-mutilation of tongue and lips due to involuntary movements	1	1	2.5	45.4889	0.021978	1	0.960083	1	VPS13A;
Sensorineural hearing impairment (less common)	1	1	2.5	45.4889	0.021978	1	0.960083	1	ATRX;
Sensorineural hearing loss (1 patient)	1	2	2.5	22.8576	0.0434848	1	1	1	HDAC4;
Sensorineural hearing loss (less common)	1	1	2.5	45.4889	0.021978	1	0.960083	1	ATRX;
Septal defects	1	5	2.5	9.17041	0.105275	1	1	1	NOTCH2;
Serpentine fibulae	1	1	2.5	45.4889	0.021978	1	0.960083	1	NOTCH2;
Severe behavioral problems beginning at 3 to 4 years of age	1	1	2.5	45.4889	0.021978	1	0.960083	1	GNS;
Severe disorder	1	3	2.5	15.2637	0.0645303	1	1	1	SUCLG1;
Severe, early-onset periodontitis	1	1	2.5	45.4889	0.021978	1	0.960083	1	CTSC;
Severe infections in untreated patients with neutropenia	1	1	2.5	45.4889	0.021978	1	0.960083	1	TCN2;
Shawl scrotum	1	6	2.5	7.64455	0.124994	1	1	1	ATRX;
Short distal digits	1	1	2.5	45.4889	0.021978	1	0.960083	1	NOTCH2;
Shortened metacarpals	1	1	2.5	45.4889	0.021978	1	0.960083	1	HDAC4;
Shortened metatarsals	1	1	2.5	45.4889	0.021978	1	0.960083	1	HDAC4;
Shortened phalanges	1	1	2.5	45.4889	0.021978	1	0.960083	1	HDAC4;
Short limbs	1	4	2.5	11.4573	0.085124	1	1	1	PHGDH;
Short nails	1	6	2.5	7.64455	0.124994	1	1	1	NOTCH2;
Short neck	3	63	7.5	2.17301	0.158376	1	1	1	NOTCH2; PHGDH; GNS;
Short neck (less common)	1	1	2.5	45.4889	0.021978	1	0.960083	1	ATRX;
Short stature	5	172	12.5	1.32492	0.325252	1	1	1	ATRX; SMPD1; NOTCH2; HDAC4; LRP5;
Short stature (less common)	1	2	2.5	22.8576	0.0434848	1	1	1	SMPD1;
Short stature (type II, infantile and juvenile)	1	1	2.5	45.4889	0.021978	1	0.960083	1	NEU1;
Short, thin upper lip	1	1	2.5	45.4889	0.021978	1	0.960083	1	ATRX;
Signet ring cell adenocarcinoma	1	4	2.5	11.4573	0.085124	1	1	1	IL1B;
Significant phenotypic variability	1	2	2.5	22.8576	0.0434848	1	1	1	TGFBI;
Sinusitis, recurrent	1	2	2.5	22.8576	0.0434848	1	1	1	ICOS;
Skel	2	46	5	1.98723	0.268242	1	1	1	CTSA; LRP5;
Skeletal	12	634	30	0.861692	0.791237	1	1	1	ATRX; FBXO7; SMPD1; NOTCH2; HDAC4; PHGDH; GNS; VPS13A; GLA; NEU1; CTSC; LRP5;
Skin	17	539	42.5	1.43553	0.0547307	1	1	1	PRF1; SMPD1; SUCLG1; MSH2; ITIH4; JUP; NOTCH2; HDAC4; KRT18; PHGDH; KRT5; KRT1; KRT8; CTSA; GLA; CTSC; KRT10;
Skin blistering	2	2	5	45.4889	0.000471217	1	0.335993	1	KRT1; KRT10;
Skin Histology	3	53	7.5	2.58294	0.108285	1	1	1	KRT5; KRT1; KRT10;
Skin manifestations are more severe and of later onset than Papillon-Lefevre syndrome	1	1	2.5	45.4889	0.021978	1	0.960083	1	CTSC;
Skin, Nails, Hair	15	554	37.5	1.23245	0.207564	1	1	1	PRF1; SMPD1; SUCLG1; MSH2; ITIH4; JUP; NOTCH2; HDAC4; PHGDH; KRT5; KRT1; GNS; GLA; CTSC; KRT10;
Skin over joint surfaces of hands and feet is thick, red, and edematous	1	1	2.5	45.4889	0.021978	1	0.960083	1	KRT1;
Skull	2	148	5	0.617746	0.850376	1	1	1	NOTCH2; LRP5;
Sleep disturbances	1	10	2.5	4.58979	0.199716	1	1	1	SLC2A1;
Sleep disturbances common	1	3	2.5	15.2637	0.0645303	1	1	1	GNS;
Sleeping disturbances	1	1	2.5	45.4889	0.021978	1	0.960083	1	HDAC4;
Slender, tapering fingers	1	1	2.5	45.4889	0.021978	1	0.960083	1	ATRX;
Sloping forehead	1	12	2.5	3.82546	0.234707	1	1	1	PHGDH;
Slowing mental development by 1.5 to 3 years of age	1	3	2.5	15.2637	0.0645303	1	1	1	GNS;
Slow progression	1	18	2.5	2.55101	0.330964	1	1	1	FBXO7;
Slow saccades	1	5	2.5	9.17041	0.105275	1	1	1	FBXO7;
Slurred speech (type I)	1	1	2.5	45.4889	0.021978	1	0.960083	1	NEU1;
Small ears	1	17	2.5	2.70099	0.315785	1	1	1	ATRX;
Small mandible	1	9	2.5	5.0992	0.181641	1	1	1	NOTCH2;
Small penis	1	21	2.5	2.18676	0.374559	1	1	1	ATRX;
Small philtrum	1	1	2.5	45.4889	0.021978	1	0.960083	1	ATRX;
Small placenta	1	1	2.5	45.4889	0.021978	1	0.960083	1	PHGDH;
Small testes	2	12	5	7.61304	0.0270521	1	1	1	ATRX; PHGDH;
Small triangular nose	1	1	2.5	45.4889	0.021978	1	0.960083	1	ATRX;
Smooth, waxy, thick skin over palms and soles, desquamating in large flakes	1	1	2.5	45.4889	0.021978	1	0.960083	1	KRT1;
Somatic mutation	1	30	2.5	1.53095	0.489377	1	1	1	HDAC4;
Some patients may be asymptomatic	1	3	2.5	15.2637	0.0645303	1	1	1	LRP5;
Some patients respond to acetazolamide	1	1	2.5	45.4889	0.021978	1	0.960083	1	SLC2A1;
Some patients show improvement during summer or with fever	1	2	2.5	22.8576	0.0434848	1	1	1	KRT5;
Spastic diplegia	1	3	2.5	15.2637	0.0645303	1	1	1	GCDH;
Spasticity	3	103	7.5	1.32921	0.396958	1	1	1	NUP62; SLC2A1; GFAP;
Spasticity later	1	1	2.5	45.4889	0.021978	1	0.960083	1	ATRX;
Spasticity (later)	1	1	2.5	45.4889	0.021978	1	0.960083	1	SMPD1;
Spasticity, mainly in the lower limbs	1	1	2.5	45.4889	0.021978	1	0.960083	1	FBXO7;
Spastic paraplegia	1	6	2.5	7.64455	0.124994	1	1	1	SLC2A1;
Spastic quadriplegia	1	12	2.5	3.82546	0.234707	1	1	1	PHGDH;
Speech and language difficulties	2	4	5	22.8012	0.00274911	1	0.960083	1	SLC2A1; TPP1;
Spina bifida	1	9	2.5	5.0992	0.181641	1	1	1	PHGDH;
Spine	4	286	10	0.637776	0.89584	1	1	1	ATRX; NOTCH2; GNS; LRP5;
Spleen	5	109	12.5	2.09063	0.0867856	1	1	1	PRF1; SMPD1; ICOS; GNS; NEU1;
Splenomegaly	3	84	7.5	1.62982	0.280098	1	1	1	PRF1; SMPD1; ICOS;
Splenomegaly (type II, all subtypes)	1	1	2.5	45.4889	0.021978	1	0.960083	1	NEU1;
Spontaneous fracture	1	1	2.5	45.4889	0.021978	1	0.960083	1	LRP5;
Still birth	1	1	2.5	45.4889	0.021978	1	0.960083	1	NEU1;
Striatal necrosis	1	1	2.5	45.4889	0.021978	1	0.960083	1	GCDH;
Strokes	1	1	2.5	45.4889	0.021978	1	0.960083	1	GLA;
Subcapsular opacities	1	2	2.5	22.8576	0.0434848	1	1	1	LRP5;
Subvalvular aortic stenosis (1 patient)	1	1	2.5	45.4889	0.021978	1	0.960083	1	HDAC4;
Sudden death	1	9	2.5	5.0992	0.181641	1	1	1	JUP;
Superficial and deep perivascular infiltrates in the dermis	2	2	5	45.4889	0.000471217	1	0.335993	1	KRT1; KRT10;
Susceptibility conferred by mutation in the homolog of the S. pombe checkpoint kinase 2 gene (CHEK2,	1	23	2.5	1.99669	0.40207	1	1	1	TSG101;
Swelling	2	2	5	45.4889	0.000471217	1	0.335993	1	KRT18; KRT8;
Symmetrical progressive demyelination	1	1	2.5	45.4889	0.021978	1	0.960083	1	GCDH;
Symptoms precipitated by stress, exertion, fatigue, alcohol	1	1	2.5	45.4889	0.021978	1	0.960083	1	SLC2A1;
Synophrys	2	16	5	5.71097	0.0465432	1	1	1	NOTCH2; GNS;
Talipes calcaneovalgus	1	4	2.5	11.4573	0.085124	1	1	1	ATRX;
Talipes equinovarus	1	49	2.5	0.937437	0.668365	1	1	1	ATRX;
Tall lumbar vertebral bodies	1	1	2.5	45.4889	0.021978	1	0.960083	1	NOTCH2;
Tapered, pointed distal phalanges	1	1	2.5	45.4889	0.021978	1	0.960083	1	CTSC;
Tapering fingers	1	4	2.5	11.4573	0.085124	1	1	1	ATRX;
Teeth	4	228	10	0.800011	0.758262	1	1	1	ATRX; NOTCH2; CTSC; LRP5;
Telecanthus	1	17	2.5	2.70099	0.315785	1	1	1	NOTCH2;
Tendinous xanthomas presenting after age 20 years in heterozygotes, during first 4 years of life in homozygotes	1	7	2.5	6.55403	0.144288	1	1	1	ITIH4;
Tenesmus	1	1	2.5	45.4889	0.021978	1	0.960083	1	GLA;
Tetraplegia	1	3	2.5	15.2637	0.0645303	1	1	1	PRF1;
Thickened cortex of long bones	1	3	2.5	15.2637	0.0645303	1	1	1	LRP5;
Thickened cortices of long bones	1	1	2.5	45.4889	0.021978	1	0.960083	1	LRP5;
Thickened cranial vault	1	1	2.5	45.4889	0.021978	1	0.960083	1	LRP5;
Thickened granular layer of epidermis	1	2	2.5	22.8576	0.0434848	1	1	1	KRT1;
Thickened nails	1	3	2.5	15.2637	0.0645303	1	1	1	KRT5;
Thickened skull vault	1	1	2.5	45.4889	0.021978	1	0.960083	1	NOTCH2;
Thick eyebrows	2	8	5	11.4148	0.0121322	1	0.960083	1	NOTCH2; GNS;
Thick lips	2	14	5	6.52624	0.0362819	1	1	1	PHGDH; GNS;
Thick ribs	1	2	2.5	22.8576	0.0434848	1	1	1	GNS;
Thick, straight hair	1	1	2.5	45.4889	0.021978	1	0.960083	1	NOTCH2;
Thick, waxy skin of palms and soles with well-defined erythematous border	1	2	2.5	22.8576	0.0434848	1	1	1	KRT1;
Three variants distinguished by age of onset - infantile ( onset before age 2), juvenile (onset in childhood), and adult	1	1	2.5	45.4889	0.021978	1	0.960083	1	GFAP;
Thrombocytopenia	2	52	5	1.75798	0.317826	1	1	1	PRF1; PHGDH;
Tics	1	1	2.5	45.4889	0.021978	1	0.960083	1	VPS13A;
Toe syndactyly	1	4	2.5	11.4573	0.085124	1	1	1	PHGDH;
Tonic-clonic seizures (less common)	1	1	2.5	45.4889	0.021978	1	0.960083	1	SLC2A1;
Tonofilament aggregation in suprabasal keratinocytes	2	2	5	45.4889	0.000471217	1	0.335993	1	KRT1; KRT10;
Tooth loss	1	2	2.5	22.8576	0.0434848	1	1	1	LRP5;
Torus palatinus	1	1	2.5	45.4889	0.021978	1	0.960083	1	LRP5;
Total body paralysis, paroxysmal	1	1	2.5	45.4889	0.021978	1	0.960083	1	SLC2A1;
Tractional retinal detachment	1	1	2.5	45.4889	0.021978	1	0.960083	1	LRP5;
Transcobalamin II deficiency	1	1	2.5	45.4889	0.021978	1	0.960083	1	TCN2;
TRANSCOBALAMIN II DEFICIENCY	1	1	2.5	45.4889	0.021978	1	0.960083	1	TCN2;
Transient ischemic attacks	1	2	2.5	22.8576	0.0434848	1	1	1	GLA;
Transposition of great vessels	1	4	2.5	11.4573	0.085124	1	1	1	PHGDH;
Tremor	1	33	2.5	1.39181	0.522868	1	1	1	FBXO7;
Triangular nasal tip	1	1	2.5	45.4889	0.021978	1	0.960083	1	ATRX;
Type II sialidosis - severe disease, dysmorphic features, variable onset (congenital or hydropic (in utero), infantile (1-12 months), juvenile (2-20 years))	1	1	2.5	45.4889	0.021978	1	0.960083	1	NEU1;
Type I sialidosis (cherry-red spot/myoclonus syndrome ) - mild disease, no dysmorphic features, onset in second decade	1	1	2.5	45.4889	0.021978	1	0.960083	1	NEU1;
Umbilical hernia	2	43	5	2.12585	0.243436	1	1	1	ATRX; NOTCH2;
Upslanting palpebral fissure	1	1	2.5	45.4889	0.021978	1	0.960083	1	HDAC4;
Upslanting palpebral fissures	1	20	2.5	2.29604	0.360345	1	1	1	ATRX;
Up to 60% of cases	1	1	2.5	45.4889	0.021978	1	0.960083	1	MSH2;
Up to 60% of female mutation carriers develop lobular breast cancer	1	4	2.5	11.4573	0.085124	1	1	1	IL1B;
Usually asymptomatic	1	7	2.5	6.55403	0.144288	1	1	1	TGFBI;
Usually fatal by age 5 years	1	1	2.5	45.4889	0.021978	1	0.960083	1	HEXA;
Usually no organomegaly	1	1	2.5	45.4889	0.021978	1	0.960083	1	CTSA;
Vacuolated lymphocytes (type II)	1	1	2.5	45.4889	0.021978	1	0.960083	1	NEU1;
Vacuolation of stratum granulosum	2	2	5	45.4889	0.000471217	1	0.335993	1	KRT1; KRT10;
Vacuolization of glomerular and tubular epithelial cells	1	1	2.5	45.4889	0.021978	1	0.960083	1	GLA;
Valvular disease (mitral)	1	1	2.5	45.4889	0.021978	1	0.960083	1	GLA;
VAN BUCHEM DISEASE, TYPE 2	1	1	2.5	45.4889	0.021978	1	0.960083	1	LRP5;
Variable age at onset, ranging from 18 months to 27 years	1	1	2.5	45.4889	0.021978	1	0.960083	1	ICOS;
Variable clinical presentation ranging from acute onset to normal adult	1	1	2.5	45.4889	0.021978	1	0.960083	1	GCDH;
Variable degree of T cell dysfunction	1	2	2.5	22.8576	0.0434848	1	1	1	ICOS;
Variable features	1	2	2.5	22.8576	0.0434848	1	1	1	SLC2A1;
Variable phenotype	3	36	7.5	3.80232	0.0425463	1	1	1	ATRX; SMPD1; SUCLG1;
Variable sclerosis	1	1	2.5	45.4889	0.021978	1	0.960083	1	LRP5;
Variable severity	1	55	2.5	0.835189	0.710901	1	1	1	KRT5;
Vascular	3	215	7.5	0.636815	0.869551	1	1	1	KRT18; PHGDH; KRT8;
Ventricular septal defect	2	52	5	1.75798	0.317826	1	1	1	PHGDH; LRP5;
Vertebral collapse	1	1	2.5	45.4889	0.021978	1	0.960083	1	NOTCH2;
Vertical talus	1	6	2.5	7.64455	0.124994	1	1	1	PHGDH;
Vesicoureteral reflux (less common)	1	1	2.5	45.4889	0.021978	1	0.960083	1	ATRX;
Vision loss, progressive	2	6	5	15.2134	0.0066832	1	0.960083	1	CLN5; TPP1;
Vision loss, progressive (type I)	1	1	2.5	45.4889	0.021978	1	0.960083	1	NEU1;
Vitreoretinal abnormalities	1	1	2.5	45.4889	0.021978	1	0.960083	1	LRP5;
Vitreous detachment	1	2	2.5	22.8576	0.0434848	1	1	1	LRP5;
Vitreous hemorrhage	1	2	2.5	22.8576	0.0434848	1	1	1	LRP5;
Voice	2	67	5	1.36446	0.437594	1	1	1	FBXO7; NEU1;
Vomiting	5	86	12.5	2.64968	0.0374	1	1	1	ATRX; SMPD1; TCN2; GLA; LIPA;
Warty thickening of flexural skin	2	2	5	45.4889	0.000471217	1	0.335993	1	KRT1; KRT10;
Weakness	1	16	2.5	2.86969	0.30027	1	1	1	TCN2;
Weight	3	122	7.5	1.12222	0.509353	1	1	1	ATRX; SMPD1; HDAC4;
Well-defined erythematous border	1	1	2.5	45.4889	0.021978	1	0.960083	1	KRT1;
Whorl-like corneal dystrophy in carrier females	1	1	2.5	45.4889	0.021978	1	0.960083	1	GLA;
Widely-spaced upper incisors	1	1	2.5	45.4889	0.021978	1	0.960083	1	ATRX;
Wide metaphyses	1	3	2.5	15.2637	0.0645303	1	1	1	LRP5;
Wide mouth	1	5	2.5	9.17041	0.105275	1	1	1	GNS;
Widening of cortical sulci	1	1	2.5	45.4889	0.021978	1	0.960083	1	GCDH;
Widening of the ventricles	1	1	2.5	45.4889	0.021978	1	0.960083	1	SUCLG1;
Widespread hemangiomas	1	1	2.5	45.4889	0.021978	1	0.960083	1	CTSA;
Woolly hair	1	2	2.5	22.8576	0.0434848	1	1	1	JUP;
Worldwide frequency of 1 in 100,000 infants	1	1	2.5	45.4889	0.021978	1	0.960083	1	GCDH;
Wormian bones	1	11	2.5	4.17291	0.217402	1	1	1	NOTCH2;
Xanthelasma	1	8	2.5	5.7358	0.163168	1	1	1	ITIH4;
Xanthomas	1	1	2.5	45.4889	0.021978	1	0.960083	1	SMPD1;
X-linked	1	25	2.5	1.83702	0.4284	1	1	1	GLA;
X-linked dominant	1	60	2.5	0.765602	0.742243	1	1	1	ATRX;
X-linked mental retardation-hypotonic facies syndrome	1	1	2.5	45.4889	0.021978	1	0.960083	1	ATRX;
X-linked recessive	2	99	5	0.923469	0.650765	1	1	1	ATRX; CFP;
Yellow subcutaneous tissue covered by thin, scaly skin	1	1	2.5	45.4889	0.021978	1	0.960083	1	PHGDH;
Zygomatic complex hypoplasia	1	1	2.5	45.4889	0.021978	1	0.960083	1	POLR1C;

## Sheet: COSMIC
Analysis: COSMIC
Dataset name: BanLecsecretomep005
Number of genes in the dataset: 217
Number of genes in the dataset (which are available in COSMIC database) :217
Number of genes in background: 18585
Is analysis quantitative: No
						Corrected p-values
COSMIC	No. of genes in the dataset	No. of genes in the background dataset	Percentage of genes	Fold enrichment	P-value (Hypergeometric test)	Bonferroni method	BH method	Q-value (Storey-Tibshirani method)	genes mapped (from input data set)
skin	150	11549	69.1244	1.11239	0.0185628	0.779637	0.155927	0.348727	ACSL5; ADPGK; APPL2; ARL6IP1; ATP2B4; ATRX; BICD2; CD226; CD27; CDK6; CHST11; CNOT10; EFR3A; FBXO7; FGFR1OP; GIMAP8; GORASP2; GZMA; HDAC3; HEATR5B; IFNG; IL2; IPO11; LIF; LRPAP1; M6PR; MMP8; NCKAP1; NUDCD1; OSM; PFKFB3; PI4KA; PPP1R16B; PRPSAP1; RAC1; RNMT; RPS6KA1; SEMA3F; SEMA4D; SHOC2; SIGLEC5; SLC31A1; SMPD1; SP100; SUCLG1; THOC2; TOP2A; TRMT1; TSPAN5; TUBA1C; URM1; WBSCR22; WDR4; XRCC6; DXO;…
prostate	119	9587	54.8387	1.06312	0.18504	1	0.671982	1	ADPGK; APPL2; ARL6IP1; ATP2B4; ATRX; CD226; CD27; CHST11; CLN5; CNOT10; EXOSC5; F2RL3; GIMAP8; GORASP2; GZMA; HEATR5B; HNRNPH3; IFNG; LIF; LRPAP1; LRRC47; LTA; NCKAP1; NUDCD1; PAF1; PFKFB3; PI4KA; PPP1R16B; PRF1; RAC1; RECQL; SEMA3F; SEMA4D; SIGLEC5; SMPD1; SP100; SUCLG1; TNFRSF4; TOP2A; TRMT1; TSG101; TSPAN5; WBSCR22; WDR4; XRCC6; ZFP36L1; CCDC9; DCK; MSH2; POLR1C; PRICKLE2; RBM47; SDE2; LAG3; A…
biliary tract	17	1799	7.8341	0.809755	0.851902	1	1	1	CD226; KIAA1033; LIF; LRPAP1; PPP1R16B; PRF1; SEMA4D; TRMT1; NOTCH2; HDAC4; KRT5; KRT1; LRP1; KRT77; C3; HEXA; NDRG3;
CancerGeneCensus geneList	8	503	3.68664	1.36376	0.235711	1	0.707134	1	ATRX; CDK6; FGFR1OP; IL2; PRF1; RAC1; MSH2; NOTCH2;
lung	179	15353	82.4885	0.998543	0.562053	1	1	1	ACSL5; ADPGK; APPL2; ARL6IP1; ATP2B4; ATRX; BICD2; CD226; CD27; CHST11; CLEC1B; CNOT10; EFR3A; EXOSC5; F2RL3; FAM45A; FBXO7; FGFR1OP; GIMAP8; GLRX; GORASP2; IFNG; IL2; IPO11; KIAA1033; LIF; LRPAP1; LRRC47; M6PR; NCKAP1; NUDCD1; NUP62; OSM; PAF1; PFKFB3; PI4KA; PMVK; PNKP; PPP1R16B; PRF1; PRPSAP1; RAB3D; RAC1; RECQL; RNMT; RPS6KA1; SEMA3F; SEMA4D; SHOC2; SIGLEC5; SLC2A1; SLC31A1; SMPD1; SP100; SRP…
autonomic ganglia	16	736	7.37327	1.8629	0.012831	0.538904	0.147908	0.330791	ATRX; MMP8; SLC2A1; SRSF12; TNPO2; WBSCR22; MSH2; ITIH4; GCDH; C1QA; MMP12; TIMP2; AOAH; LIPG; PIK3AP1; LRP5;
meninges	7	447	3.22581	1.34302	0.268332	1	0.738663	1	F2RL3; SLC2A1; THOC2; NOTCH2; HSPA13; GNS; LIPA;
kidney	159	13456	73.2719	1.01202	0.42033	1	0.96647	1	ACSL5; APPL2; ATP2B4; ATRX; BICD2; CD226; CD27; CDK6; CLN5; EFR3A; EXOSC5; FAM45A; FBXO7; FGFR1OP; GIMAP8; GORASP2; GZMA; HEATR5B; IPO11; KIAA1033; LIF; M6PR; MMP8; NCKAP1; NUDCD1; NUP62; PAF1; PFKFB3; PI4KA; PMVK; PNKP; PPP1R16B; PRF1; PRPSAP1; RAB3D; RAC1; RANGRF; RECQL; RNMT; SEMA3F; SEMA4D; SHOC2; SLC31A1; SMPD1; SP100; SRP72; SUCLG1; THOC2; TNFRSF4; TNPO2; TOP2A; TSG101; TSPAN5; TUBA1C; URM1…
endometrium	154	12807	70.9677	1.02987	0.281395	1	0.738663	1	ACSL5; ADPGK; APPL2; ATP2B4; ATRX; BICD2; CD226; CDK6; CHST11; CLN5; CNOT10; EFR3A; EXOSC5; FAM45A; FBXO7; FGFR1OP; GIMAP8; GLRX; GORASP2; GZMA; HDAC3; HEATR5B; IFNG; IL2; IPO11; KIAA1033; LRPAP1; LRRC47; LTA; M6PR; NCKAP1; NUP62; OSM; PAF1; PFKFB3; PI4KA; PMVK; PNKP; PPP1R16B; PRF1; PRPSAP1; RAB3D; RAC1; RANGRF; RNMT; RPS6KA1; SEMA4D; SHOC2; SIGLEC5; SLC2A1; SP100; SRSF12; THOC2; TNPO2; TOP2A; T…
stomach	16	1289	7.37327	1.0637	0.437213	1	0.96647	1	ATRX; HDAC3; PRPSAP1; SRP72; SRSF12; FKBP9; MSH2; POLR1C; PRICKLE2; CREM; SPEG; STAB1; CEP128; MCM4; KRT10; MERTK;
large intestine	214	17427	98.6175	1.05171	0.000502225	0.0210934	0.0210934	0.0471749	ACSL5; ADPGK; APPL2; ARL6IP1; ATP2B4; ATRX; BICD2; CD226; CD27; CDK6; CHST11; CLEC1B; CLN5; CNOT10; DOHH; EFR3A; EXOSC5; F2RL3; FAM45A; FBXO7; FGFR1OP; GIMAP8; GLRX; GORASP2; GZMA; HDAC3; HEATR5B; HNRNPH3; IFNG; IL18; IL2; IPO11; KIAA1033; LIF; LRPAP1; LRRC47; LTA; M6PR; MMP8; NCKAP1; NUDCD1; NUP62; OSM; PAF1; PFKFB3; PI4KA; PMVK; PNKP; POLE3; PPP1R16B; PRF1; PRPSAP1; RAB3D; RAC1; RANGRF; RECQL; …
parathyroid	1	202	0.460829	0.428185	0.907952	1	1	1	IPO11;
central nervous system	154	12014	70.9677	1.09785	0.0281343	1	0.168806	0.377529	ACSL5; APPL2; ATP2B4; ATRX; BICD2; CDK6; CLEC1B; CLN5; CNOT10; DOHH; EFR3A; EXOSC5; F2RL3; FBXO7; GIMAP8; GORASP2; HEATR5B; HNRNPH3; IFNG; IL2; IPO11; KIAA1033; LRPAP1; LRRC47; LTA; M6PR; MMP8; NCKAP1; NUDCD1; NUP62; OSM; PAF1; PFKFB3; PI4KA; PMVK; PPP1R16B; PRF1; PRPSAP1; RAB3D; RECQL; RNMT; RPS6KA1; SEMA3F; SEMA4D; SIGLEC5; SLC2A1; SMPD1; SP100; SRSF12; SUCLG1; THOC2; TNFRSF4; TNPO2; TOP2A; TRM…
eye	13	461	5.99078	2.41685	0.003088	0.129696	0.0648479	0.145031	NUP62; PI4KA; RECQL; SEMA4D; SIGLEC5; SMPD1; XRCC6; CCDC9; POLR1C; OLFML2B; SYTL4; GZMH; CTSA;
ovary	137	12007	63.1336	0.977238	0.702761	1	1	1	APPL2; ARL6IP1; ATP2B4; ATRX; BICD2; CD27; CLN5; CNOT10; EFR3A; FAM45A; FBXO7; FGFR1OP; GIMAP8; GZMA; HDAC3; HEATR5B; HNRNPH3; IPO11; KIAA1033; LRPAP1; LRRC47; M6PR; MMP8; NCKAP1; NUDCD1; PFKFB3; PI4KA; PNKP; PPP1R16B; PRF1; PRPSAP1; RAB3D; RECQL; RPS6KA1; SEMA4D; SHOC2; SLC2A1; SMPD1; SP100; SRP72; THOC2; TNFRSF18; TNPO2; TOP2A; TRMT1; TSG101; TSPAN5; TUBA1C; WBSCR22; WDR4; XRCC6; ZFP36L1; ZNF70…
bone	19	1330	8.75576	1.22408	0.211366	1	0.682876	1	ARL6IP1; CHST11; GIMAP8; PI4KA; SEMA4D; THOC2; TSG101; RBM47; ESYT2; NAAA; SPEG; CST7; KRT79; HPSE; LRP1; KRT77; IL1B; GLA; GUCY1B3;
240 NB cases mutantgeneList	49	3941	22.5806	1.06503	0.334373	1	0.826098	1	ACSL5; ATRX; CHST11; DOHH; FGFR1OP; GIMAP8; HEATR5B; LRPAP1; NUDCD1; PI4KA; PNKP; PPP1R16B; RNMT; SIGLEC5; SMPD1; SP100; TSG101; WDR4; ZNF706; DCK; MSH2; NUP85; PPP2R5B; RBM47; GZMB; NOTCH2; GCDH; LIMD1; SPEG; HDAC4; MMP12; MRC1; RRM1; FAM129B; KRT79; KRT1; STAB1; PPP3R1; SDS; HPSE; LRP1; VPS13A; C3; IL1B; ST8SIA4; TPP1; CD320; KRT10; MERTK;
haematopoietic and lymphoid tissue	102	8977	47.0046	0.973182	0.674514	1	1	1	ACSL5; ATRX; BICD2; CD27; CDK6; CHST11; CNOT10; DOHH; EXOSC5; FAM45A; GIMAP8; GZMA; HEATR5B; IPO11; KIAA1033; LRRC47; LTA; NUP62; PI4KA; PNKP; SEMA3F; SEMA4D; SIGLEC5; SLC31A1; SP100; SRP72; SUCLG1; THOC2; TUBA1C; URM1; ZFP36L1; CLUH; FKBP9; MSH2; NCBP2; PRICKLE2; RBM47; SDE2; LAG3; ARHGAP18; ESYT2; ITIH4; JUP; NOTCH2; OLFML2B; SYTL4; TCN2; CAMSAP3; GCDH; SPEG; ZNF662; HDAC4; TGFBI; GFAP; MMP12; …
breast	182	14924	83.871	1.04446	0.104789	1	0.54316	1	ACSL5; ADPGK; APPL2; ARL6IP1; ATP2B4; ATRX; BICD2; CD226; CD27; CDK6; CHST11; CLEC1B; CLN5; CNOT10; EFR3A; EXOSC5; FAM45A; FBXO7; FGFR1OP; GIMAP8; GORASP2; GZMA; HEATR5B; HNRNPH3; IL18; IPO11; KIAA1033; LIF; LRPAP1; LRRC47; LTA; M6PR; MMP8; NCKAP1; NUDCD1; NUP62; OSM; PAF1; PFKFB3; PI4KA; PMVK; PNKP; POLE3; PPP1R16B; PRF1; PRPSAP1; RAB3D; RANGRF; RECQL; RNMT; RPS6KA1; SEMA3F; SEMA4D; SHOC2; SIGLE…
upper aerodigestive tract	67	6364	30.8756	0.901762	0.869823	1	1	1	ADPGK; APPL2; ATRX; BICD2; CNOT10; HEATR5B; KIAA1033; LRRC47; PI4KA; PPP1R16B; RECQL; SLC31A1; SP100; SRP72; THOC2; TOP2A; TSPAN5; ZFP36L1; CCDC9; CLUH; LAT; PPP2R5B; RBM47; SDE2; IL2RA; ARHGAP18; ESYT2; NOTCH2; OLFML2B; TCN2; CAMSAP3; SPEG; ZNF662; TGFBI; GFAP; C1QA; MMP12; FOLR1; KRT18; PHGDH; TIMP2; FAM129B; KRT5; KRT79; BID; STAB1; ASNS; SLC1A5; GM2A; B4GALT5; CTSA; LRP1; VPS13A; C3; SLC7A1; …
cervix	41	2590	18.894	1.35604	0.0248968	1	0.168806	0.377529	APPL2; ATP2B4; BICD2; CD226; CNOT10; F2RL3; GIMAP8; M6PR; NCKAP1; PNKP; RAB3D; RAC1; RNMT; RPS6KA1; TOP2A; URM1; CLUH; FKBP9; MSH2; ESYT2; NOTCH2; CAMSAP3; GCDH; MMP12; FOLR1; AOAH; KRT1; ASNS; CTSS; SLC1A5; GM2A; CEP128; LRP1; GNS; VPS13A; CD320; HEXA; FASN; PIK3AP1; LRP5; SLC44A1;
thyroid	101	8760	46.5438	0.987513	0.59582	1	1	1	APPL2; ATRX; BICD2; CD27; CHST11; CLN5; F2RL3; FBXO7; FGFR1OP; GIMAP8; GORASP2; HDAC3; HEATR5B; KIAA1033; LRPAP1; M6PR; MMP8; OSM; PI4KA; PPP1R16B; PRPSAP1; RNMT; RPS6KA1; SEMA3F; SEMA4D; SIGLEC5; SLC2A1; SMPD1; SRP72; TNFRSF18; TNFRSF4; TOP2A; TSPAN5; TUBA1C; URM1; WBSCR22; WDR4; ZFP36L1; ZNF706; CCDC9; CLUH; FKBP9; KIAA0040; LAT; RBM47; LAG3; GZMB; CREM; ESYT2; ITIH4; NOTCH2; OLFML2B; TCN2; CAM…
liver	166	14176	76.4977	1.00291	0.506783	1	1	1	ACSL5; ADPGK; APPL2; ARL6IP1; ATP2B4; ATRX; BICD2; CD27; CLEC1B; CLN5; CNOT10; DOHH; EFR3A; EXOSC5; F2RL3; FAM45A; FBXO7; FGFR1OP; GORASP2; GZMA; HDAC3; HEATR5B; IFNG; IL18; IPO11; KIAA1033; LIF; LRPAP1; LRRC47; MMP8; NCKAP1; NUDCD1; PAF1; PFKFB3; PI4KA; PMVK; PNKP; PPP1R16B; PRF1; RAB3D; RAC1; RECQL; RNMT; RPS6KA1; SEMA3F; SEMA4D; SHOC2; SIGLEC5; SMPD1; SP100; SRP72; THOC2; TNFRSF4; TNPO2; TOP2A…
pancreas	150	12286	69.1244	1.04566	0.191995	1	0.671982	1	ACSL5; ADPGK; APPL2; ARL6IP1; ATP2B4; ATRX; CD226; CDK6; CHST11; CLN5; CNOT10; EFR3A; F2RL3; FBXO7; FGFR1OP; GIMAP8; GLRX; GORASP2; GZMA; HDAC3; HEATR5B; IPO11; KIAA1033; LRRC47; LTA; MMP8; NCKAP1; NUDCD1; PAF1; PFKFB3; PI4KA; PPP1R16B; PRF1; PRPSAP1; RAB3D; RECQL; RNMT; SEMA3F; SEMA4D; SIGLEC5; SLC2A1; SMPD1; SP100; SRSF12; THOC2; TNFRSF18; TNFRSF4; TNPO2; TOP2A; TRMT1; TUBA1C; WDR4; XRCC6; ZFP3…
neuroblastoma	16	744	7.37327	1.84287	0.0140864	0.591631	0.147908	0.330791	ATRX; MMP8; SLC2A1; SRSF12; TNPO2; WBSCR22; MSH2; ITIH4; GCDH; C1QA; MMP12; TIMP2; AOAH; LIPG; PIK3AP1; LRP5;
oesophagus	66	5660	30.4147	0.998793	0.53093	1	1	1	ADPGK; APPL2; ATRX; BICD2; CD226; CHST11; CLEC1B; EFR3A; F2RL3; GIMAP8; HEATR5B; IPO11; PI4KA; PNKP; RPS6KA1; SEMA3F; SIGLEC5; SLC2A1; SMPD1; SRP72; SRSF12; THOC2; XRCC6; CCDC9; CLUH; MSH2; PPP2R5B; PRICKLE2; RBM47; GZMB; CREM; NAAA; NOTCH2; OLFML2B; TCN2; CAMSAP3; GCDH; LDLRAD2; LIMD1; SPEG; ZNF662; HDAC4; TGFBI; IDO1; CCL5; KRT1; STAB1; C4BPA; LIPG; SLC1A5; CEP128; KRT8; CTSA; MCM4; HSPA13; LRP…
adrenal gland	1	53	0.460829	1.63172	0.463855	1	0.974096	1	KRT5;
urinary tract	160	13085	73.7327	1.04726	0.15738	1	0.660994	1	ACSL5; APPL2; ATP2B4; ATRX; BICD2; CD226; CDK6; CHST11; CLEC1B; EFR3A; EXOSC5; F2RL3; FAM45A; FBXO7; FGFR1OP; GIMAP8; GLRX; GORASP2; HEATR5B; HNRNPH3; IFNG; IPO11; KIAA1033; LRPAP1; LRRC47; MMP8; NCKAP1; NUDCD1; NUP62; OSM; PAF1; PFKFB3; PI4KA; PMVK; PNKP; PPP1R16B; PRF1; PRPSAP1; RAB3D; RECQL; RPS6KA1; SEMA3F; SEMA4D; SHOC2; SIGLEC5; SLC2A1; SMPD1; SP100; SRP72; SRSF12; SUCLG1; THOC2; TNFRSF4; T…
small intestine	2	196	0.921659	0.878215	0.669822	1	1	1	SIGLEC5; MSH2;
salivary gland	10	555	4.60829	1.5446	0.116391	1	0.54316	1	ATRX; CD226; PI4KA; SP100; TNPO2; ZFP36L1; FKBP9; NOTCH2; GCDH; KRT18;
